# Supplementary material
Source: publisher figshare collection journal article supplement (https://plos.figshare.com/articles/dataset/_/127846)

**A** Correlation between expression levels  
in the two individuals  $\text{cor}=0.95$ ,  $p<1\text{e-}200$

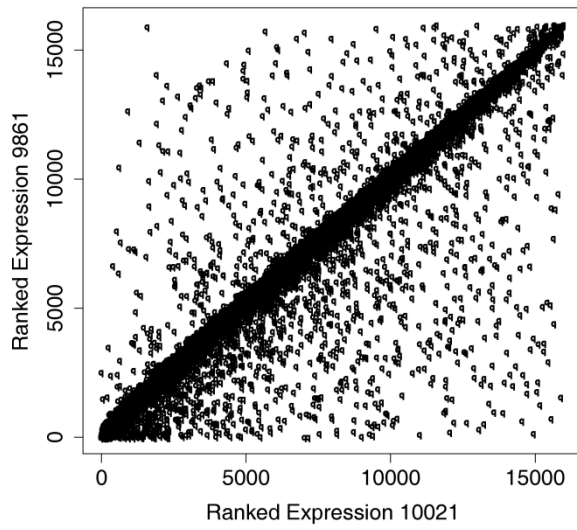

**B** Correlation between connectivity levels  
in the two individuals  $\text{cor}=0.52$ ,  $p<1\text{e-}200$

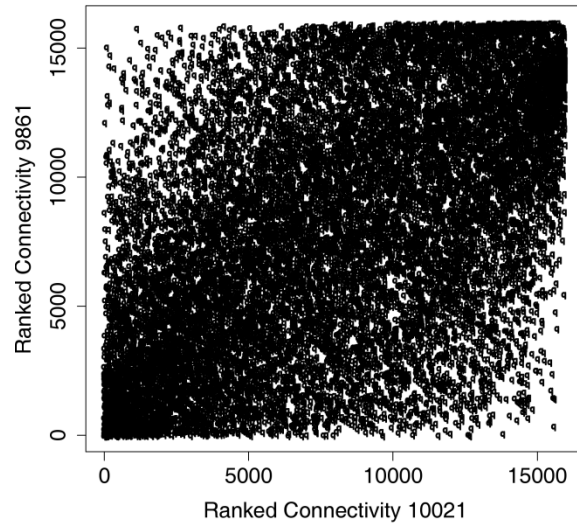

Supplement: Supplementary file 1 [file 1 › Figure_S1.pdf]
