# Supplementary material
Source: publisher figshare collection journal article supplement (https://plos.figshare.com/articles/dataset/_/127846)

## (A) Enrichment for neuronal genes

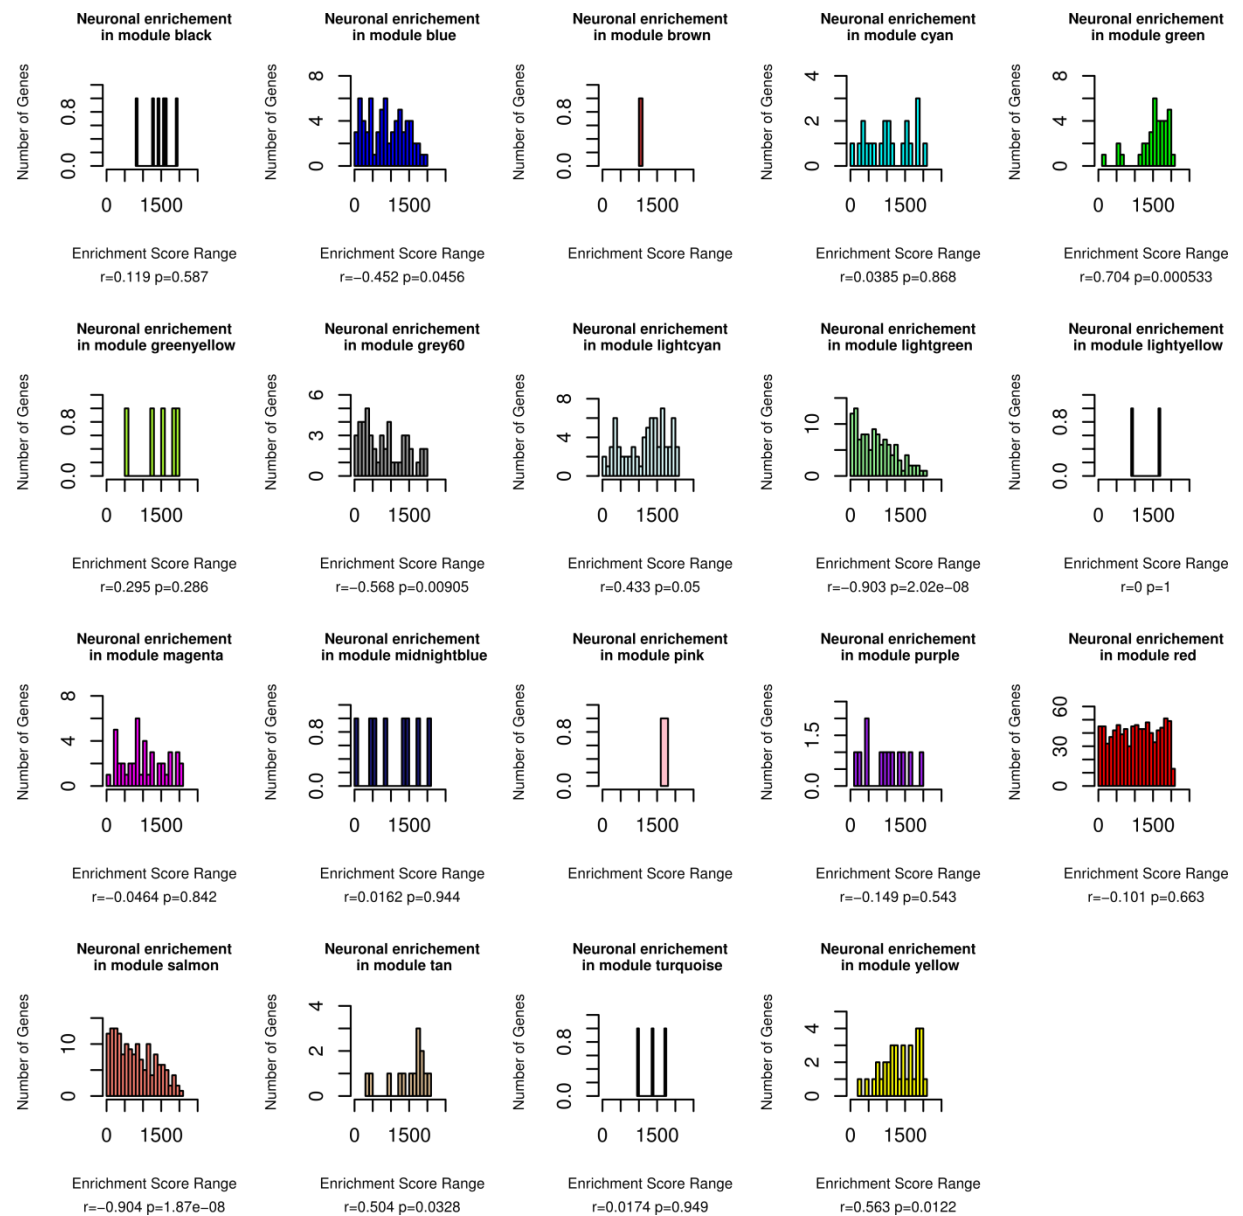

## (B) Enrichment for astrocyte specific genes

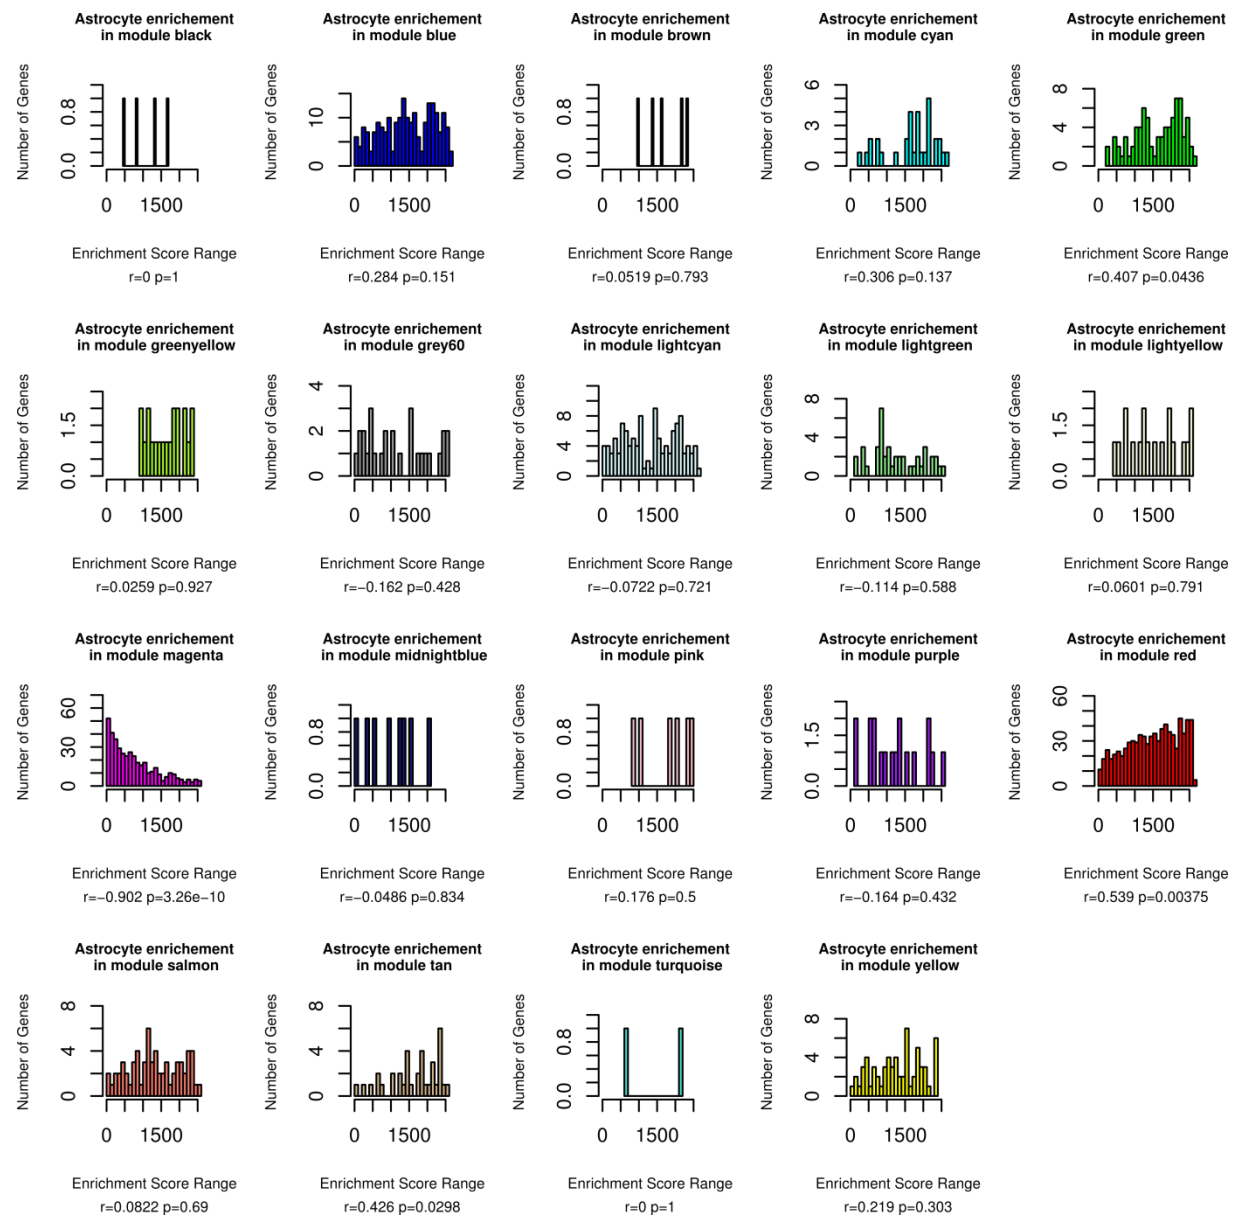

## (C) Enrichment for oligodendrocytes specific genes

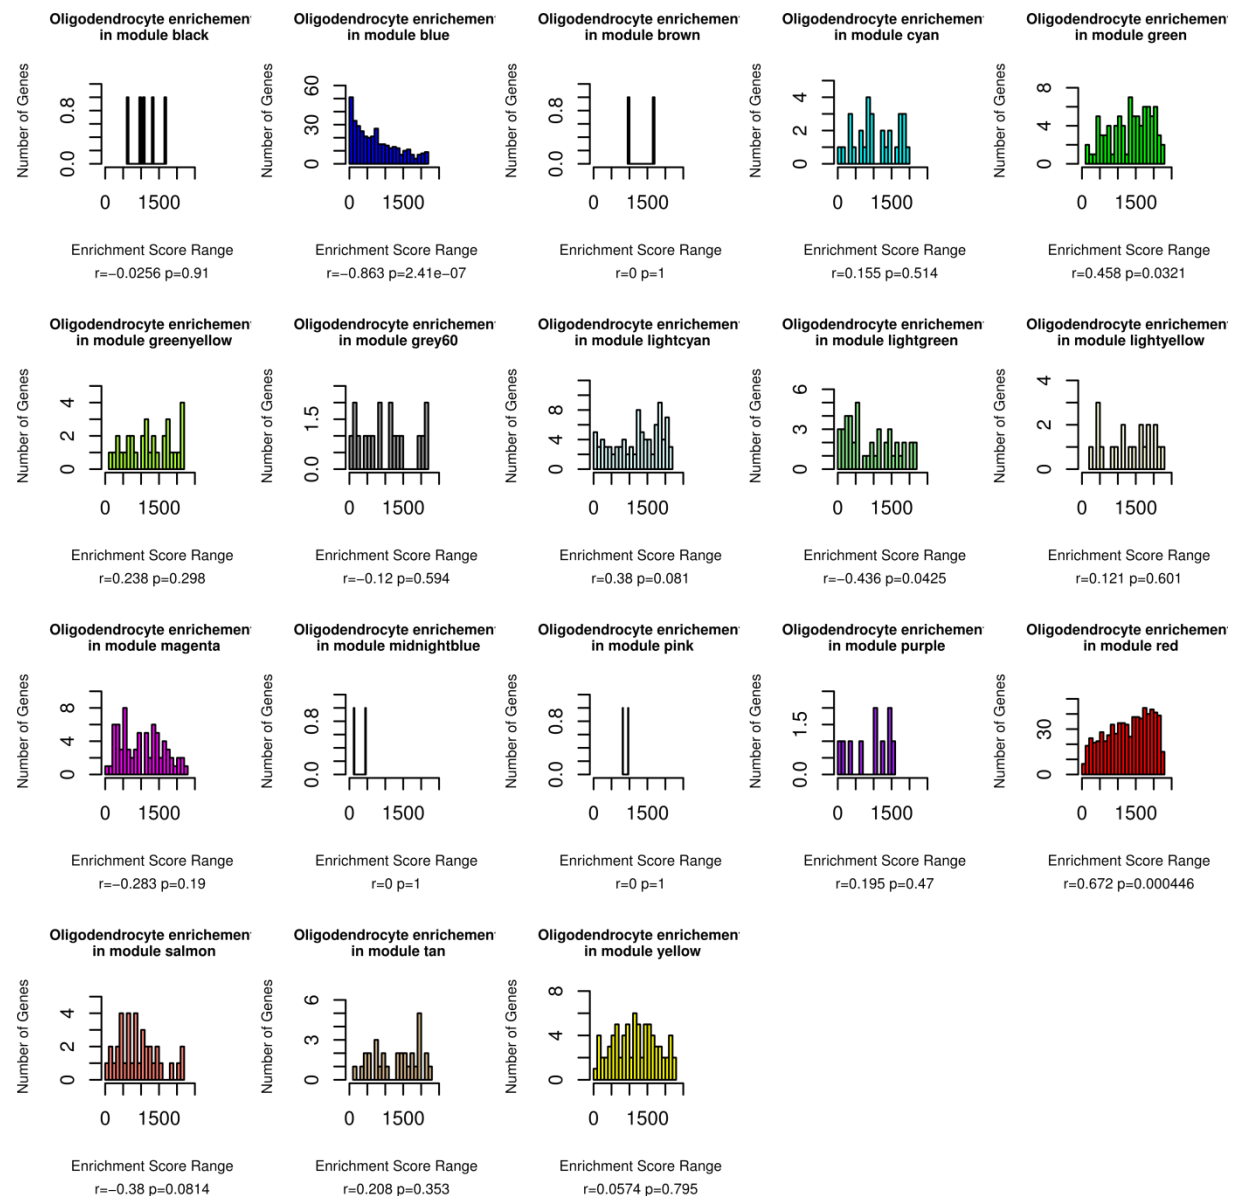

Supplement: Supplementary file 1 [file 1 › Figure_S3.pdf]
