# Supplementary material
Source: publisher figshare collection journal article supplement (https://plos.figshare.com/articles/dataset/_/127846)
Supplement: Supplementary file 1 [file 1 › Table_S1.csv]

geneSymbol	gene_name	entrez_is	moduleColor	MM.grey60	p.MM.grey60	MM.lightgreen	p.MM.lightgreen	MM.red	p.MM.red	MM.salmon	p.MM.salmon	MM.yellow	p.MM.yellow	MM.greenyellow	p.MM.greenyellow	MM.blue	p.MM.blue	MM.magenta	p.MM.magenta	MM.cyan	p.MM.cyan	MM.tan	p.MM.tan	MM.lightyellow	p.MM.lightyellow	MM.black	p.MM.black	MM.turquoise	p.MM.turquoise	MM.green	p.MM.green	MM.midnightblue	p.MM.midnightblue	MM.lightcyan	p.MM.lightcyan	MM.brown	p.MM.brown	MM.pink	p.MM.pink	MM.purple	p.MM.purple
FAM96B	family with sequence similarity 96, member B	51647	yellow	0.103617916	0.000144853	-0.210173714	7.64E-15	0.713545952	5.38E-209	0.073066958	0.00745576	0.665545263	3.30E-172	0.615664042	1.28E-140	0.099025853	0.000282889	-0.028731572	0.293266101	0.391431977	2.65E-50	0.103389454	0.000149856	0.725311241	3.36E-219	-0.114018373	2.87E-05	-0.398144939	3.90E-52	-0.549997941	8.50E-107	-0.076653543	0.004992874	-0.364289488	2.56E-43	0.23181446	8.31E-18	-0.351463848	3.04E-40	-0.002275564	0.933675276
JTB	jumping translocation breakpoint	10899	yellow	0.04885628	0.073803092	-0.200040652	1.46E-13	0.711295709	4.21E-207	0.16746795	6.91E-10	0.625998823	1.08E-146	0.519798063	1.29E-93	-0.05608735	0.040088671	-0.085787108	0.001671179	0.3747822	6.11E-46	0.079248367	0.003698125	0.64919586	3.38E-161	-0.147142007	6.28E-08	-0.396114001	1.41E-51	-0.571403785	5.47E-117	-0.174468506	1.28E-10	-0.407039787	1.25E-54	0.149283316	4.01E-08	-0.37018409	8.86E-45	0.038793195	0.155819412
C1orf43	chromosome 1 open reading frame 43	25912	yellow	0.100199644	0.000239031	-0.238984537	7.39E-19	0.69246194	6.04E-192	0.119491729	1.16E-05	0.620998719	1.00E-143	0.589930406	1.95E-126	0.1025022	0.000170868	-0.011374629	0.677406603	0.368109826	2.92E-44	0.087999877	0.001261596	0.700957687	1.24E-198	-0.221845481	2.11E-16	-0.430631645	1.29E-61	-0.590755992	7.17E-127	-0.235590668	2.35E-18	-0.450933757	4.31E-68	0.154559062	1.30E-08	-0.414545889	8.61E-57	-0.019211443	0.482265897
GABARAP	GABA(A) receptor-associated protein	11337	yellow	0.032715633	0.231387818	-0.29021558	2.04E-27	0.683704533	2.74E-185	0.07199756	0.008376474	0.73288577	4.69E-226	0.600044805	7.41E-132	0.161157162	2.98E-09	0.115662209	2.19E-05	0.371945302	3.20E-45	0.050087099	0.066813239	0.709383484	1.65E-205	-0.126194693	3.59E-06	-0.376999296	1.66E-46	-0.551441377	1.84E-107	-0.090311979	0.000934157	-0.372945407	1.79E-45	0.199221058	1.84E-13	-0.367520185	4.09E-44	-0.049816688	0.068300318
ERGIC3	ERGIC and golgi 3	51614	yellow	0.024664009	0.366979516	-0.259398845	4.80E-22	0.676617069	4.52E-180	0.14536244	9.06E-08	0.639458154	5.89E-155	0.511475306	3.26E-90	0.019776394	0.469477164	0.011679143	0.669275589	0.356823644	1.64E-41	0.09907179	0.00028104	0.724819851	9.19E-219	-0.153763768	1.54E-08	-0.442799688	1.91E-65	-0.580100455	2.39E-121	-0.137372018	4.47E-07	-0.440477922	1.06E-64	0.113998126	2.88E-05	-0.418296464	6.81E-58	0.003884909	0.887017727
SCAMP3	secretory carrier membrane protein 3	10067	yellow	0.215504524	1.52E-15	-0.16397884	1.56E-09	0.649812299	1.34E-161	-0.049612296	0.069442282	0.557617918	2.43E-110	0.640514968	1.27E-155	0.218392907	6.23E-16	-0.005324945	0.84559299	0.328912266	3.58E-35	0.19768198	2.84E-13	0.751726352	3.55E-244	-0.137002401	4.80E-07	-0.4501884	7.59E-68	-0.521638511	2.21E-94	-0.046857637	0.086416343	-0.335991614	1.02E-36	0.172790191	1.93E-10	-0.362249286	8.07E-43	-0.069023467	0.011493334
C19orf56	chromosome 19 open reading frame 56	51398	yellow	0.018699124	0.494024842	-0.269905276	8.45E-24	0.639181589	8.79E-155	0.053497469	0.050241344	0.732349	1.46E-225	0.593866124	1.60E-128	0.16299849	1.96E-09	0.009598539	0.72555503	0.338969908	2.21E-37	0.036674506	0.179691391	0.637178105	1.58E-153	0.053134439	0.051823335	-0.357011977	1.48E-41	-0.46911249	2.84E-74	-0.008965766	0.742986349	-0.282274081	5.75E-26	0.198247191	2.42E-13	-0.311054462	1.89E-31	-0.028344499	0.299820199
MRPL40	mitochondrial ribosomal protein L40	64976	yellow	0.087209893	0.001395806	-0.296450007	1.37E-28	0.633158276	4.88E-151	0.091575704	0.000790366	0.666853007	4.04E-173	0.59118291	4.27E-127	0.134992066	7.06E-07	0.11001972	5.44E-05	0.342907675	2.86E-38	0.029432179	0.281648983	0.622987753	6.70E-145	-0.150578593	3.05E-08	-0.400488712	8.75E-53	-0.573638119	4.27E-118	-0.038843401	0.155284405	-0.309692372	3.55E-31	0.259965295	3.88E-22	-0.319503463	3.52E-33	-0.043540196	0.111137548
CHID1	chitinase domain containing 1	66005	yellow	-0.189742189	2.51E-12	-0.17427729	1.34E-10	0.628676636	2.64E-148	0.431014439	9.80E-62	0.572996877	8.89E-118	0.319495732	3.53E-33	-0.072640338	0.007811603	0.026987683	0.323559674	0.245364692	8.01E-20	-0.12163322	8.01E-06	0.442517794	2.36E-65	-0.07257984	0.007863276	-0.320641288	2.04E-33	-0.394484335	3.94E-51	-0.024430114	0.371542478	-0.330450488	1.66E-35	0.066727003	0.0145636	-0.484353106	9.43E-80	-0.042397134	0.120844405
SF3A1	splicing factor 3a, subunit 1, 120kDa	10291	yellow	0.101979319	0.000184515	-0.265472111	4.75E-23	0.605970046	4.01E-135	0.130820651	1.55E-06	0.575936834	3.03E-119	0.642708351	5.16E-157	0.104038485	0.000136052	0.064854656	0.01757966	0.316211957	1.69E-32	0.196329052	4.14E-13	0.61519288	2.39E-140	-0.115216457	2.36E-05	-0.457188786	3.54E-70	-0.555162721	3.45E-109	-0.077522771	0.004519494	-0.333007507	4.61E-36	0.201651531	9.23E-14	-0.275626411	8.68E-25	-0.045041047	0.099338157
RNF5	ring finger protein 5	6048	yellow	-0.038490301	0.159076808	-0.348508147	1.48E-39	0.59716212	2.72E-130	0.17038286	3.45E-10	0.663086241	1.65E-170	0.534182068	9.96E-100	0.134832197	7.28E-07	0.067481996	0.013482699	0.415806172	3.68E-57	0.108683608	6.70E-05	0.694720751	1.06E-193	-0.162903685	2.00E-09	-0.340552089	9.74E-38	-0.539378468	5.22E-102	-0.154528396	1.30E-08	-0.336335223	8.52E-37	0.114336668	2.73E-05	-0.38882113	1.33E-49	0.04993586	0.067641637
RPL7A	ribosomal protein L7a	6130	yellow	-0.00336918	0.901934878	-0.226086524	5.42E-17	0.594528104	7.09E-129	0.144759403	1.03E-07	0.808729294	1.08741977675399e-310	0.514280279	2.38E-91	0.110652178	4.92E-05	0.062610252	0.021904399	0.316813904	1.27E-32	0.061680669	0.023950264	0.556393479	9.16E-110	0.098609363	0.000300185	-0.213505255	2.80E-15	-0.34125951	6.75E-38	-0.045396503	0.096695295	-0.288850825	3.65E-27	0.104106806	0.000134671	-0.361725603	1.08E-42	-0.001375099	0.959891355
EIF3F	eukaryotic translation initiation factor 3, subunit F	8665	yellow	-0.033664082	0.2181334	-0.256938526	1.20E-21	0.592848661	5.58E-128	0.095213094	0.00048293	0.68815386	1.22E-188	0.480018908	3.64E-78	0.052357727	0.055348147	0.02325635	0.394967827	0.326897482	9.68E-35	0.071755916	0.008598093	0.637726755	7.18E-154	0.019213646	0.482215661	-0.324524612	3.10E-34	-0.424349528	1.06E-59	-0.138331932	3.71E-07	-0.404897308	5.08E-54	0.086874122	0.001456737	-0.336642329	7.28E-37	-0.005060295	0.853177649
POP5	processing of precursor 5, ribonuclease P/MRP subunit (S. cerevisiae)	51367	yellow	0.188217035	3.77E-12	-0.128733303	2.27E-06	0.592708708	6.62E-128	0.037290712	0.172484252	0.545571722	8.83E-105	0.576086456	2.55E-119	0.127613438	2.78E-06	0.068840382	0.011715141	0.315214401	2.70E-32	0.234760021	3.10E-18	0.68977555	7.05E-190	-0.141761927	1.88E-07	-0.378143084	8.43E-47	-0.451426887	2.96E-68	-0.149368569	3.94E-08	-0.414493525	8.92E-57	0.074904178	0.006083646	-0.382791259	5.24E-48	-0.013982365	0.609080841
TBCB	tubulin folding cofactor B	1155	yellow	-0.057522424	0.035252607	-0.241292603	3.33E-19	0.590775413	7.00E-127	0.171911472	2.38E-10	0.640979532	6.46E-156	0.435869822	3.02E-63	0.13419102	8.23E-07	-0.03689286	0.177112372	0.409582269	2.35E-55	-0.133805014	8.85E-07	0.496179904	3.38E-84	-0.046967698	0.085679211	-0.240588449	4.25E-19	-0.432647925	3.06E-62	0.091124358	0.000839185	-0.144915238	9.93E-08	0.297922081	7.18E-29	-0.239895731	5.40E-19	0.062601613	0.02192269
PSMD9	proteasome (prosome, macropain) 26S subunit, non-ATPase, 9	5715	yellow	-0.04310885	0.114725688	-0.309956126	3.14E-31	0.577731437	3.80E-120	0.00589318	0.829356963	0.721292322	1.18E-215	0.613700309	1.72E-139	0.181738366	2.05E-11	0.103107894	0.000156245	0.411720319	5.70E-56	0.175727618	9.35E-11	0.685904964	6.13E-187	0.00946938	0.729101868	-0.267933629	1.83E-23	-0.423637954	1.74E-59	-0.116775316	1.82E-05	-0.346515056	4.28E-39	0.087510395	0.001343276	-0.346161229	5.16E-39	0.105128035	0.000115534
HINT2	histidine triad nucleotide binding protein 2	84681	yellow	0.071696307	0.008653561	-0.242063308	2.55E-19	0.576463747	1.65E-119	0.137827335	4.09E-07	0.729298403	8.85E-223	0.454561475	2.69E-69	0.147017692	6.44E-08	0.25170309	8.26E-21	0.289463057	2.81E-27	-0.036472694	0.182099738	0.547429035	1.27E-105	-0.032382622	0.236174447	-0.265617541	4.49E-23	-0.407582675	8.79E-55	-0.02629114	0.336209453	-0.272189588	3.43E-24	0.095496033	0.00046444	-0.44387376	8.63E-66	-0.090277553	0.000938393
MYL6	myosin, light chain 6, alkali, smooth muscle and non-muscle	4637	yellow	0.063836288	0.01943945	-0.206907708	2.01E-14	0.571815316	3.42E-117	-0.100663062	0.000223539	0.710424308	2.25E-206	0.517984479	7.23E-93	0.179795608	3.37E-11	0.077896553	0.004328723	0.302269513	1.04E-29	-0.012684326	0.642713724	0.509878917	1.43E-89	0.057424537	0.035565892	-0.208452574	1.27E-14	-0.339808578	1.43E-37	-0.116676653	1.85E-05	-0.279019427	2.19E-25	0.086327354	0.001561216	-0.381477323	1.15E-47	0.000905253	0.973589433
COPE	coatomer protein complex, subunit epsilon	11316	yellow	0.077643329	0.004457148	-0.229007023	2.10E-17	0.569122804	7.24E-116	0.122809925	6.53E-06	0.680315943	8.92E-183	0.436332325	2.17E-63	0.169972665	3.80E-10	0.195058636	5.89E-13	0.28088461	1.02E-25	0.039005726	0.153564162	0.604602367	2.31E-134	-0.068760286	0.011813364	-0.283509804	3.44E-26	-0.412082441	4.48E-56	0.043939961	0.107891677	-0.279179789	2.05E-25	0.045821616	0.09360862	-0.463677159	2.19E-72	-0.089879681	0.000988659
LOC124685	hCG1644301	124685	yellow	0.040696721	0.136494958	-0.272849333	2.64E-24	0.562010381	2.00E-112	-0.108282585	7.13E-05	0.602088032	5.64E-133	0.449800578	1.02E-67	0.093686386	0.000595098	-0.073714311	0.006943502	0.292092772	9.11E-28	-0.141942417	1.81E-07	0.463390443	2.75E-72	-0.078552944	0.004011281	-0.219500524	4.41E-16	-0.532571696	4.98E-99	0.17595084	8.84E-11	0.002865361	0.916541044	0.553791736	1.50E-108	-0.008298809	0.761502731	-0.088757507	0.00114416
COMMD4	COMM domain containing 4	54939	yellow	0.104928074	0.000119067	-0.206596954	2.20E-14	0.559110395	4.81E-111	0.027200968	0.319749027	0.582035933	2.46E-122	0.48333185	2.24E-79	0.14657209	7.06E-08	0.058307719	0.032823387	0.308329925	6.65E-31	0.124578265	4.79E-06	0.691068461	7.19E-191	-0.123611956	5.68E-06	-0.351173574	3.55E-40	-0.463280203	3.00E-72	-0.006742672	0.805221837	-0.318702434	5.16E-33	0.134865476	7.24E-07	-0.339375907	1.79E-37	-0.064943062	0.017425812
RNF181	ring finger protein 181	51255	yellow	-0.072741833	0.007725596	-0.252499239	6.18E-21	0.557565526	2.58E-110	0.184924393	8.98E-12	0.811556126	1.45401381254964e-314	0.50895475	3.36E-89	0.244821988	9.70E-20	0.212054459	4.34E-15	0.270990353	5.51E-24	-0.155047557	1.16E-08	0.378936528	5.26E-47	0.109071801	6.31E-05	-0.180270824	2.98E-11	-0.256225048	1.57E-21	-0.023633639	0.387342604	-0.238162607	9.79E-19	0.076571363	0.005039869	-0.423586029	1.80E-59	-0.057793238	0.034398107
TMEM147	transmembrane protein 147	10430	yellow	0.090724815	0.000884716	-0.314156111	4.45E-32	0.555770014	1.80E-109	0.076355917	0.005164976	0.679059778	7.47E-182	0.604228998	3.72E-134	0.221333269	2.48E-16	0.195267371	5.56E-13	0.268593935	1.41E-23	0.072691293	0.007768317	0.56467393	1.05E-113	-0.043494922	0.111509948	-0.384055631	2.44E-48	-0.460614157	2.45E-71	-0.029731299	0.276785434	-0.317233332	1.04E-32	0.157563806	6.68E-09	-0.321587527	1.29E-33	-0.094295501	0.000547718
AIP	aryl hydrocarbon receptor interacting protein	9049	yellow	0.15261429	1.97E-08	-0.25220128	6.89E-21	0.554839837	4.88E-109	0.017451663	0.5232861	0.643266609	2.27E-157	0.563367857	4.48E-113	0.172564288	2.03E-10	0.0109201	0.689613109	0.303026115	7.40E-30	0.231560821	9.04E-18	0.719867066	2.06E-214	-0.058394252	0.032564681	-0.350998102	3.91E-40	-0.462269558	6.66E-72	-0.087884165	0.00128048	-0.350021987	6.60E-40	0.089320898	0.001063468	-0.313400101	6.34E-32	-0.038843348	0.155284971
POLR2I	polymerase (RNA) II (DNA directed) polypeptide I, 14.5kDa	5438	yellow	0.02002925	0.46381452	-0.220166366	3.58E-16	0.552588188	5.44E-108	0.048270688	0.077332453	0.790038645	1.31E-286	0.570692392	1.23E-116	0.170644447	3.24E-10	0.041834853	0.125856412	0.301927121	1.21E-29	0.084084229	0.002066032	0.512069697	1.88E-90	0.204643946	3.90E-14	-0.23011789	1.46E-17	-0.276906792	5.18E-25	-0.043201424	0.113948044	-0.292006148	9.45E-28	0.08713783	0.001408682	-0.2710966	5.29E-24	0.035282506	0.196790954
GAMT	guanidinoacetate N-methyltransferase	2593	yellow	-0.063402984	0.020281453	-0.273673919	1.90E-24	0.548098973	6.29E-106	0.04647965	0.088986949	0.612937046	4.71E-139	0.498353999	4.92E-85	0.265589525	4.54E-23	0.048914425	0.073459951	0.312430736	9.97E-32	0.039482508	0.148595138	0.668111959	5.31E-174	-0.102673456	0.000166608	-0.293409197	5.16E-28	-0.435886636	2.99E-63	0.043610108	0.110564414	-0.271407981	4.67E-24	0.115508992	2.25E-05	-0.357843382	9.35E-42	-0.073309505	0.007259992
DTNBP1	dystrobrevin binding protein 1	84062	yellow	-0.166035626	9.67E-10	-0.364816266	1.90E-43	0.547415775	1.29E-105	0.398096698	4.02E-52	0.690997984	8.14E-191	0.312826037	8.29E-32	0.00360586	0.895084444	0.236676504	1.62E-18	0.263006354	1.22E-22	-0.203017096	6.24E-14	0.393618425	6.78E-51	-0.075856394	0.005465893	-0.257784183	8.79E-22	-0.426607917	2.19E-60	-0.018250845	0.50443829	-0.232098802	7.56E-18	0.141403865	2.02E-07	-0.373357077	1.41E-45	-0.09996705	0.00024718
BTF3L1	basic transcription factor 3-like 1, pseudogene	690	yellow	0.041325293	0.130536854	-0.323119781	6.15E-34	0.542273003	2.69E-103	-0.054425982	0.046378161	0.644223335	5.55E-158	0.69268374	4.07E-192	0.179671472	3.47E-11	0.025984129	0.341884607	0.291100441	1.40E-27	0.142270297	1.70E-07	0.596906102	3.74E-130	-0.006555213	0.810532727	-0.411815788	5.35E-56	-0.495741018	4.97E-84	-0.229595647	1.73E-17	-0.434250605	9.71E-63	0.100361419	0.000233512	-0.309253567	4.35E-31	0.0383171	0.160962442
RPS4Y1	ribosomal protein S4, Y-linked 1	6192	yellow	-0.050387883	0.065190518	-0.341459324	6.08E-38	0.541018343	9.75E-103	0.092687517	0.000681119	0.652903692	1.24E-163	0.525112408	7.69E-96	-0.00706145	0.796211281	-0.011814712	0.665668064	0.331354628	1.06E-35	0.003351674	0.902441867	0.483126304	2.67E-79	0.004648939	0.864993443	-0.316099686	1.78E-32	-0.495854611	4.50E-84	-0.139358222	3.03E-07	-0.298983445	4.50E-29	0.255881509	1.78E-21	-0.185538018	7.65E-12	0.068548971	0.012076013
LOC100289396	hypothetical protein LOC100289396	100289396	yellow	0.016129829	0.555233544	-0.300288475	2.52E-29	0.540228168	2.19E-102	0.069452966	0.010987547	0.58934427	3.97E-126	0.45263879	1.18E-68	0.162210093	2.34E-09	0.154653772	1.27E-08	0.402834157	1.93E-53	0.100449008	0.000230574	0.73683533	1.00E-229	-0.186434404	6.04E-12	-0.329951392	2.13E-35	-0.515205403	9.98E-92	-0.064886838	0.017523518	-0.31631447	1.61E-32	0.116188706	2.01E-05	-0.381799511	9.51E-48	0.012839477	0.638653154
DIS3L	DIS3 mitotic control homolog (S. cerevisiae)-like	115752	yellow	-0.004990474	0.855180928	-0.271764646	4.06E-24	0.538094674	1.93E-101	0.02794969	0.306605077	0.559452408	3.31E-111	0.594718598	5.61E-129	0.201849399	8.72E-14	0.067699261	0.013185063	0.264729581	6.33E-23	0.164250135	1.47E-09	0.652300835	3.09E-163	-0.090088457	0.00096198	-0.411813554	5.36E-56	-0.44202557	3.39E-65	-0.117335556	1.66E-05	-0.411779124	5.48E-56	0.071396591	0.008937328	-0.332353178	6.41E-36	-0.034602954	0.205558533
SIVA1	SIVA1, apoptosis-inducing factor	10572	yellow	-0.128213801	2.50E-06	-0.20922764	1.01E-14	0.53691239	6.38E-101	0.400882707	6.79E-53	0.681604446	9.97E-184	0.351941515	2.35E-40	-0.00413197	0.879885455	0.21484754	1.86E-15	0.18470234	9.52E-12	-0.05134272	0.060253031	0.404758221	5.56E-54	0.032247981	0.238129465	-0.236667734	1.63E-18	-0.303161643	6.97E-30	-0.015558431	0.569332379	-0.314107108	4.55E-32	-0.008331226	0.760599512	-0.483193297	2.52E-79	-0.097537607	0.000349347
PAF1	Paf1, RNA polymerase II associated factor, homolog (S. cerevisiae)	54623	yellow	0.031322177	0.251881632	-0.266364947	3.37E-23	0.534882133	4.94E-100	-0.009578322	0.726109827	0.617272934	1.50E-141	0.572630576	1.35E-117	0.23933391	6.55E-19	0.042848179	0.116937821	0.360782563	1.83E-42	0.215615712	1.47E-15	0.736457543	2.27E-229	-0.072264064	0.008137985	-0.327682834	6.57E-35	-0.426316619	2.69E-60	-0.10248224	0.000171371	-0.365419655	1.35E-43	0.042939936	0.116155363	-0.354996538	4.47E-41	0.053683069	0.049448292
C19orf43	chromosome 19 open reading frame 43	79002	yellow	0.299008132	4.45E-29	-0.040093744	0.142405396	0.534372648	8.23E-100	-0.060814875	0.026002589	0.523335227	4.30E-95	0.41933892	3.35E-58	0.037071133	0.175027264	-0.035246833	0.197244303	0.218718334	5.63E-16	0.197361638	3.11E-13	0.556971665	4.90E-110	-0.053998966	0.048122623	-0.285870335	1.28E-26	-0.383588645	3.24E-48	-0.055004689	0.044099137	-0.307821838	8.40E-31	0.076231196	0.005238675	-0.292058397	9.24E-28	-0.041963274	0.124697685
CHMP2A	chromatin modifying protein 2A	27243	yellow	-0.15903269	4.82E-09	-0.332664633	5.48E-36	0.53420905	9.70E-100	0.27373888	1.85E-24	0.733780659	7.00E-227	0.459588948	5.47E-71	0.107098097	8.56E-05	0.107733992	7.77E-05	0.260782351	2.85E-22	-0.101173682	0.000207562	0.44998061	8.88E-68	0.063378818	0.020329335	-0.253771418	3.88E-21	-0.355109681	4.20E-41	0.005106594	0.851849742	-0.220442651	3.28E-16	0.216572391	1.09E-15	-0.314892469	3.15E-32	-0.101838204	0.00018837
C6orf129	chromosome 6 open reading frame 129	154467	yellow	-0.040613198	0.137302193	-0.212969903	3.29E-15	0.533085681	2.98E-99	0.025998955	0.341609163	0.714342842	1.14E-209	0.478958195	8.82E-78	0.20833058	1.32E-14	0.138943645	3.29E-07	0.332514431	5.91E-36	-0.082313902	0.002565645	0.475237332	1.92E-76	0.037244061	0.173022205	-0.158549312	5.37E-09	-0.301470705	1.49E-29	-0.050819018	0.062921308	-0.222094721	1.95E-16	0.102568264	0.000169212	-0.374513197	7.16E-46	0.043893275	0.108266827
RNF5P1	ring finger protein 5 pseudogene 1	286140	yellow	-0.057622736	0.034934005	-0.324977208	2.49E-34	0.526177741	2.72E-96	0.212439978	3.87E-15	0.581637176	3.93E-122	0.466853007	1.74E-73	0.132356495	1.16E-06	0.083054022	0.002344682	0.278806844	2.39E-25	0.05367469	0.049483869	0.533764433	1.51E-99	-0.163518592	1.74E-09	-0.31137598	1.63E-31	-0.473767718	6.44E-76	-0.037561533	0.169385927	-0.258043006	7.98E-22	0.055624927	0.041762132	-0.356218345	2.29E-41	-0.060052044	0.027934979
MGMT	O-6-methylguanine-DNA methyltransferase	4255	yellow	-0.125289248	4.22E-06	-0.343069646	2.63E-38	0.521133712	3.58E-94	0.113608026	3.07E-05	0.713908981	2.65E-209	0.482163523	6.01E-79	0.165446371	1.11E-09	0.174851838	1.16E-10	0.279339659	1.92E-25	0.016749299	0.540143649	0.597817779	1.20E-130	0.013594572	0.6190469	-0.287924184	5.40E-27	-0.393357824	7.98E-51	-0.013746866	0.615124553	-0.303424098	6.19E-30	0.100419196	0.00023157	-0.350007276	6.65E-40	-0.060562759	0.026628068
PMVK	phosphomevalonate kinase	10654	yellow	-0.113972411	2.89E-05	-0.237784047	1.11E-18	0.517100079	1.67E-92	0.254311281	3.18E-21	0.703864828	5.59E-201	0.283744496	3.12E-26	0.080744174	0.00309849	0.249062123	2.14E-20	0.240041749	5.13E-19	-0.172585344	2.02E-10	0.392914908	1.05E-50	0.004516025	0.868817866	-0.152341577	2.09E-08	-0.312769423	8.51E-32	0.116912435	1.78E-05	-0.108024405	7.42E-05	0.147718485	5.57E-08	-0.377189394	1.48E-46	-0.130421816	1.67E-06
HMGCL	3-hydroxymethyl-3-methylglutaryl-CoA lyase	3155	yellow	0.002656222	0.922612739	-0.318985468	4.51E-33	0.516636713	2.59E-92	0.027593483	0.312813112	0.642561972	6.39E-157	0.541568806	5.54E-103	0.263089003	1.19E-22	0.254227804	3.28E-21	0.368429143	2.43E-44	0.089367533	0.00105703	0.666215908	1.13E-172	-0.135759393	6.10E-07	-0.291884406	9.96E-28	-0.449477735	1.30E-67	-0.089896143	0.000986531	-0.287155479	7.48E-27	0.121380206	8.37E-06	-0.382464185	6.38E-48	0.002016895	0.941200034
NSMCE1	non-SMC element 1 homolog (S. cerevisiae)	197370	yellow	-0.098483763	0.000305592	-0.39581814	1.70E-51	0.516191437	3.94E-92	0.033859582	0.215470447	0.638493081	2.38E-154	0.556004851	1.39E-109	0.191171605	1.71E-12	0.136878291	4.92E-07	0.316442145	1.51E-32	0.034762032	0.203481116	0.615401964	1.81E-140	-0.050615586	0.063983782	-0.372878545	1.86E-45	-0.491745309	1.64E-82	-0.087949065	0.001269857	-0.317465973	9.31E-33	0.157707082	6.48E-09	-0.310910021	2.02E-31	-0.042410343	0.120728564
PHPT1	phosphohistidine phosphatase 1	29085	yellow	-0.167168526	7.41E-10	-0.366276014	8.30E-44	0.514209341	2.54E-91	0.260621894	3.03E-22	0.833498319	0	0.413644533	1.58E-56	0.141158886	2.12E-07	0.278882774	2.32E-25	0.228602009	2.39E-17	-0.17568775	9.44E-11	0.380154026	2.55E-47	0.076839821	0.004887812	-0.186604482	5.78E-12	-0.326000763	1.51E-34	0.023915457	0.381705835	-0.218730905	5.60E-16	0.084505351	0.001961132	-0.410186489	1.58E-55	-0.095837036	0.000443034
SNAPIN	SNAP-associated protein	23557	yellow	0.075382711	0.005765751	-0.30113677	1.73E-29	0.513496846	4.96E-91	-0.034213193	0.210713422	0.619181864	1.16E-142	0.599221918	2.08E-131	0.27838277	2.84E-25	0.194546721	6.79E-13	0.347824591	2.14E-39	0.09012346	0.000957573	0.604044558	4.70E-134	-0.10381929	0.000140575	-0.353328545	1.11E-40	-0.444582377	5.10E-66	-0.138971831	3.27E-07	-0.303258619	6.67E-30	0.096757015	0.000389781	-0.408561878	4.62E-55	0.018145029	0.506913148
EIF3L	eukaryotic translation initiation factor 3, subunit L	51386	yellow	-0.057443264	0.035505775	-0.27368435	1.89E-24	0.512142506	1.75E-90	0.288314884	4.58E-27	0.63916409	9.02E-155	0.428931871	4.28E-61	-0.018731206	0.49328403	-0.020036919	0.463643364	0.289292594	3.02E-27	0.060415842	0.026998509	0.481156433	1.40E-78	0.079069068	0.003776667	-0.284017926	2.79E-26	-0.373861024	1.05E-45	-0.068644003	0.011957261	-0.269910084	8.44E-24	0.163247966	1.85E-09	-0.213516562	2.79E-15	0.008350836	0.760053283
HIGD2A	HIG1 hypoxia inducible domain family, member 2A	192286	yellow	0.088215227	0.001227133	-0.224389984	9.36E-17	0.50939408	2.24E-89	0.136520204	5.27E-07	0.546410707	3.68E-105	0.36871719	2.06E-44	0.005694249	0.835033067	0.109206789	6.18E-05	0.326998473	9.21E-35	0.067639567	0.013266255	0.580038353	2.57E-121	-0.066447016	0.014983437	-0.364963581	1.75E-43	-0.458217242	1.59E-70	-0.134123074	8.33E-07	-0.335075068	1.62E-36	0.062635159	0.021851738	-0.370583428	7.03E-45	0.034372532	0.208594869
ACAA1	acetyl-CoA acyltransferase 1	30	yellow	0.064322235	0.01853159	-0.269846601	8.65E-24	0.505863385	5.70E-88	0.015225872	0.577615864	0.567308156	5.57E-115	0.551372911	1.98E-107	0.237571324	1.20E-18	0.1410289	2.18E-07	0.35328076	1.14E-40	0.276096474	7.18E-25	0.804994662	1.14E-305	-0.143974327	1.20E-07	-0.364418633	2.38E-43	-0.447135669	7.58E-67	-0.13978394	2.79E-07	-0.407890327	7.18E-55	0.025151819	0.35757587	-0.400172695	1.07E-52	-0.01742465	0.523929434
ATOX1	ATX1 antioxidant protein 1 homolog (yeast)	475	yellow	-0.133076465	1.02E-06	-0.271225359	5.02E-24	0.504098262	2.84E-87	0.1712147	2.82E-10	0.8010928	1.53E-300	0.448014567	3.91E-67	0.238579201	8.49E-19	0.191229951	1.68E-12	0.274567911	1.33E-24	-0.212483633	3.82E-15	0.310057507	3.00E-31	0.169278354	4.49E-10	-0.132444005	1.14E-06	-0.21146398	5.19E-15	0.033235168	0.2240583	-0.138901998	3.31E-07	0.096615799	0.000397547	-0.396900754	8.59E-52	-0.025906038	0.343337852
C17orf95	chromosome 17 open reading frame 95	124512	yellow	-0.024031942	0.379390717	-0.262525818	1.47E-22	0.499999435	1.13E-85	0.071648209	0.008698551	0.547324553	1.42E-105	0.486112659	2.11E-80	0.141413162	2.02E-07	0.026777514	0.327343459	0.527756187	5.82E-97	0.124555344	4.81E-06	0.602832245	2.20E-133	-0.066889868	0.014324181	-0.246216271	5.92E-20	-0.406333337	1.99E-54	-0.090485193	0.000913109	-0.275378955	9.59E-25	0.095864707	0.000441337	-0.280506064	1.19E-25	0.280829358	1.04E-25
LOC100294153	similar to ribosomal protein L3	100294153	yellow	-0.002033429	0.940718898	-0.349775942	7.53E-40	0.499752643	1.41E-85	0.01958746	0.47373308	0.653246505	7.33E-164	0.491577083	1.90E-82	0.097792583	0.000337012	0.068338297	0.012342997	0.369935032	1.02E-44	0.190369643	2.12E-12	0.728235597	8.08E-222	-0.091657579	0.000781798	-0.264430313	7.10E-23	-0.491521423	2.00E-82	-0.088424113	0.001194535	-0.313928554	4.95E-32	0.178252049	4.97E-11	-0.192751167	1.11E-12	0.015906416	0.560725776
MRPL24	mitochondrial ribosomal protein L24	79590	yellow	-0.027972498	0.30621037	-0.164218363	1.48E-09	0.497999155	6.74E-85	0.22149664	2.35E-16	0.495263943	7.57E-84	0.281856236	6.84E-26	0.04943188	0.070463259	-0.021255109	0.436907211	0.424683985	8.40E-60	-0.013450394	0.62277023	0.52746895	7.71E-97	-0.147638495	5.66E-08	-0.204965687	3.55E-14	-0.388365268	1.76E-49	0.069607106	0.010810903	-0.156299837	8.84E-09	0.128069441	2.56E-06	-0.344607076	1.17E-38	0.110587106	4.97E-05
LOC100128737	hypothetical LOC100128737	100128737	yellow	-0.053589273	0.049847754	-0.230465117	1.30E-17	0.497872594	7.55E-85	0.118031325	1.48E-05	0.633898607	1.71E-151	0.448889829	2.02E-67	0.210316363	7.32E-15	0.081551964	0.002812847	0.315803504	2.05E-32	-0.086227998	0.001580926	0.406908652	1.37E-54	0.001416326	0.958689892	-0.165986575	9.78E-10	-0.304389428	4.00E-30	0.033611344	0.218855782	-0.13523553	6.74E-07	0.150603776	3.03E-08	-0.298703934	5.09E-29	0.024915538	0.362111656
C3orf1	chromosome 3 open reading frame 1	51300	yellow	0.103636351	0.000144457	-0.297336174	9.30E-29	0.49542073	6.59E-84	-0.082565542	0.002488469	0.75590566	2.03E-248	0.733078697	3.11E-226	0.455456747	1.35E-69	0.241211095	3.43E-19	0.264804568	6.15E-23	0.070625349	0.009706051	0.486092272	2.15E-80	0.035863415	0.189515607	-0.256624857	1.35E-21	-0.313585818	5.81E-32	-0.094453664	0.000536003	-0.271863711	3.90E-24	0.060602461	0.026528719	-0.39269845	1.20E-50	-0.051517483	0.059383738
LOC643630	ribosomal protein L7a pseudogene	643630	yellow	-0.075581266	0.0056383	-0.227951543	2.96E-17	0.495275578	7.49E-84	0.174999739	1.12E-10	0.560953634	6.40E-112	0.290368011	1.91E-27	-0.05324688	0.051328955	-0.102083065	0.000181729	0.353086959	1.26E-40	-0.046214111	0.090829358	0.504625528	1.76E-87	-0.048537776	0.075706041	-0.177117023	6.61E-11	-0.410149745	1.62E-55	0.057534441	0.035214309	-0.157402247	6.93E-09	0.25669659	1.32E-21	-0.141051329	2.17E-07	0.032364052	0.236443414
RPS10	ribosomal protein S10	6204	yellow	-0.142160923	1.74E-07	-0.368107254	2.92E-44	0.495094616	8.79E-84	0.088330346	0.001209068	0.848284325	0	0.503697304	4.08E-87	0.162057758	2.43E-09	0.124792727	4.61E-06	0.279422679	1.86E-25	-0.024184995	0.376361958	0.493692742	3.01E-83	0.161724511	2.62E-09	-0.14453315	1.07E-07	-0.33134245	1.06E-35	0.051530777	0.05931804	-0.178109056	5.16E-11	0.212244631	4.10E-15	-0.183225853	1.40E-11	-0.042943499	0.116125062
ZNRD1	zinc ribbon domain containing 1	30834	yellow	0.220185315	3.55E-16	-0.195875991	4.70E-13	0.494799791	1.14E-83	-0.010314237	0.706009562	0.563869188	2.57E-113	0.611827024	2.02E-138	0.15618559	9.07E-09	0.134402746	7.90E-07	0.306200188	1.76E-30	0.366285257	8.26E-44	0.652741767	1.58E-163	-0.005135096	0.851032488	-0.347040495	3.24E-39	-0.387116579	3.79E-49	-0.148601211	4.63E-08	-0.365406556	1.36E-43	0.01478863	0.588592293	-0.333606411	3.41E-36	0.040887289	0.13466687
BTF3	basic transcription factor 3	689	yellow	0.002967898	0.913565959	-0.355542219	3.31E-41	0.49344603	3.73E-83	-0.076986646	0.004806414	0.554982928	4.19E-109	0.56086906	7.03E-112	0.109284133	6.10E-05	-0.071864075	0.008498258	0.313366668	6.44E-32	0.012906763	0.636895485	0.508765841	3.99E-89	-0.063493836	0.020102321	-0.296552411	1.31E-28	-0.560333003	1.26E-111	0.079444297	0.003613997	-0.101735342	0.000191228	0.511428801	3.40E-90	0.060281037	0.027342311	-0.004869494	0.858654303
ALKBH7	alkB, alkylation repair homolog 7 (E. coli)	84266	yellow	-0.023862255	0.382766076	-0.384414115	1.96E-48	0.492117384	1.19E-82	0.036114488	0.186433166	0.792745281	6.09E-290	0.564342115	1.52E-113	0.209465945	9.43E-15	0.15875729	5.12E-09	0.290757486	1.62E-27	0.125136108	4.34E-06	0.586240968	1.66E-124	0.196384641	4.08E-13	-0.281095509	9.36E-26	-0.344385601	1.32E-38	-0.005884028	0.829617904	-0.228063428	2.86E-17	0.098915051	0.000287397	-0.273080164	2.41E-24	-0.029126641	0.286676349
GRHPR	glyoxylate reductase/hydroxypyruvate reductase	9380	yellow	0.074107681	0.00664787	-0.360714645	1.90E-42	0.489325782	1.34E-81	-0.141985206	1.80E-07	0.702949691	3.08E-200	0.661977192	9.56E-170	0.433242288	2.00E-62	0.189304878	2.82E-12	0.345304277	8.12E-39	0.152322057	2.10E-08	0.71582972	6.18E-211	-0.024598584	0.368252341	-0.334528965	2.14E-36	-0.421237012	9.11E-59	-0.112844626	3.47E-05	-0.332617321	5.61E-36	0.058331602	0.032751809	-0.364980964	1.73E-43	-0.042471337	0.120194798
FIS1	fission 1 (mitochondrial outer membrane) homolog (S. cerevisiae)	51024	yellow	0.043088193	0.114899783	-0.243301677	1.65E-19	0.488051831	4.01E-81	-0.021817473	0.424870325	0.811052489	7.2031806117612e-314	0.571314947	6.05E-117	0.399670881	1.48E-52	0.173573451	1.59E-10	0.338064569	3.52E-37	0.024013311	0.379760417	0.504617152	1.77E-87	0.126095398	3.66E-06	-0.113308214	3.22E-05	-0.223560551	1.22E-16	-0.020563547	0.451975022	-0.192169263	1.30E-12	0.051278822	0.060573492	-0.344055935	1.57E-38	0.011877886	0.663989607
VKORC1	vitamin K epoxide reductase complex, subunit 1	79001	yellow	0.170995691	2.97E-10	-0.274205294	1.54E-24	0.487618412	5.81E-81	-0.148458377	4.77E-08	0.632330836	1.57E-150	0.687215482	6.27E-188	0.381901229	8.95E-48	0.086478904	0.001531587	0.332228743	6.82E-36	0.306312823	1.67E-30	0.707815795	3.28E-204	0.041497551	0.128939754	-0.352191677	2.05E-40	-0.377974186	9.32E-47	-0.03365691	0.218231538	-0.271748449	4.08E-24	0.075773116	0.005517569	-0.256369433	1.49E-21	-0.012131031	0.657280801
PSENEN	presenilin enhancer 2 homolog (C. elegans)	55851	yellow	-0.196144301	4.36E-13	-0.300750387	2.05E-29	0.487134119	8.81E-81	0.257962802	8.23E-22	0.660059824	1.95E-168	0.337478025	4.75E-37	0.101389227	0.000201144	0.171676145	2.52E-10	0.256732607	1.30E-21	-0.126679602	3.29E-06	0.424929518	7.08E-60	0.078367181	0.004098906	-0.243441304	1.57E-19	-0.304782367	3.35E-30	0.071335325	0.008996344	-0.193989146	7.91E-13	0.078395321	0.004085522	-0.366894384	5.84E-44	-0.032322677	0.23704346
UXT	ubiquitously-expressed transcript	8409	yellow	-0.027444991	0.315425304	-0.367832517	3.42E-44	0.486298114	1.80E-80	-0.020079975	0.46268315	0.857159484	0	0.644006603	7.65E-158	0.33918724	1.97E-37	0.165592083	1.07E-09	0.305140212	2.85E-30	0.096253034	0.000418165	0.548725056	3.25E-106	0.205410798	3.12E-14	-0.212285799	4.05E-15	-0.301464089	1.49E-29	-0.004403468	0.872058934	-0.234033132	3.96E-18	0.106702573	9.10E-05	-0.248891839	2.28E-20	-0.015891771	0.561086699
N6AMT2	N-6 adenine-specific DNA methyltransferase 2 (putative)	221143	yellow	-0.061042343	0.02544919	-0.258711131	6.22E-22	0.48216919	5.98E-79	0.139742156	2.81E-07	0.677776899	6.47E-181	0.537386908	3.95E-101	0.094070795	0.000564772	0.260954474	2.67E-22	0.246033261	6.32E-20	0.160662933	3.33E-09	0.501710013	2.45E-86	0.097839938	0.000334766	-0.311082812	1.87E-31	-0.297715676	7.87E-29	-0.201138791	1.07E-13	-0.418306314	6.77E-58	-0.047080185	0.084931085	-0.391384972	2.73E-50	0.019893755	0.466844162
C6orf108	chromosome 6 open reading frame 108	10591	yellow	-0.136080862	5.73E-07	-0.26497786	5.75E-23	0.481993195	6.94E-79	0.367114047	5.15E-44	0.597657112	1.47E-130	0.307776831	8.57E-31	-0.01424492	0.60237409	0.251064023	1.04E-20	0.280895533	1.02E-25	0.007493008	0.784056177	0.527365828	8.53E-97	-0.055948693	0.040584385	-0.274972621	1.13E-24	-0.364855217	1.86E-43	-0.101829128	0.000188621	-0.378980007	5.13E-47	-0.053681005	0.049457054	-0.49646452	2.63E-84	-0.003031518	0.911720637
EIF3G	eukaryotic translation initiation factor 3, subunit G	8666	yellow	0.033888907	0.215073043	-0.269670969	9.27E-24	0.481609014	9.58E-79	-0.085926107	0.001642227	0.743260216	7.75E-236	0.52365646	3.15E-95	0.287907891	5.44E-27	0.072654207	0.007799799	0.3509312	4.05E-40	0.127376965	2.90E-06	0.625310151	2.79E-146	0.166856568	7.98E-10	-0.242164624	2.46E-19	-0.315833527	2.02E-32	0.109104176	6.28E-05	-0.139719521	2.82E-07	0.079112252	0.003757613	-0.292414947	7.93E-28	0.033981327	0.213824002
RPS10P7	ribosomal protein S10 pseudogene 7	376693	yellow	-0.146927742	6.56E-08	-0.351912732	2.38E-40	0.481547504	1.01E-78	0.085440477	0.001745436	0.858590716	0	0.486562068	1.44E-80	0.173135232	1.77E-10	0.139460304	2.97E-07	0.318581856	5.47E-33	-0.008519564	0.755358326	0.506224178	4.10E-88	0.194855136	6.23E-13	-0.112321976	3.77E-05	-0.285343136	1.60E-26	-0.016973282	0.534738447	-0.21114201	5.72E-15	0.127592119	2.79E-06	-0.249068281	2.14E-20	0.018815382	0.491343083
SSR4	signal sequence receptor, delta (translocon-associated protein delta)	6748	yellow	-0.176287298	8.13E-11	-0.386252652	6.42E-49	0.480548343	2.33E-78	0.131717062	1.31E-06	0.843775761	0	0.520642907	5.73E-94	0.262254433	1.63E-22	0.205777943	2.80E-14	0.279222499	2.02E-25	-0.107376395	8.20E-05	0.405961687	2.54E-54	0.236277974	1.86E-18	-0.193173739	9.89E-13	-0.280195878	1.35E-25	0.094130085	0.000560225	-0.148105757	5.14E-08	0.111582549	4.25E-05	-0.321664157	1.24E-33	-0.030623503	0.262619663
RPS2P32	ribosomal protein S2 pseudogene 32	256355	yellow	-0.208659483	1.20E-14	-0.424731407	8.13E-60	0.476675913	5.87E-77	0.22110495	2.66E-16	0.784833821	2.45E-280	0.4542998	3.29E-69	0.161144247	2.99E-09	0.203785714	5.00E-14	0.361041451	1.59E-42	0.041979582	0.124551139	0.624074126	1.52E-145	0.033987833	0.213736273	-0.197201439	3.25E-13	-0.379285766	4.28E-47	-0.047522697	0.082039092	-0.253696432	3.99E-21	0.063682317	0.019735088	-0.352167847	2.08E-40	-0.01059599	0.698366969
GNB2L1	guanine nucleotide binding protein (G protein), beta polypeptide 2-like 1	10399	yellow	-0.048385826	0.076627875	-0.372300199	2.60E-45	0.469850549	1.56E-74	-0.005758235	0.833206415	0.692190683	9.80E-192	0.493610079	3.23E-83	0.165788047	1.02E-09	0.115368218	2.30E-05	0.383256138	3.96E-48	0.184733837	9.44E-12	0.726890417	1.31E-220	0.004199637	0.877933686	-0.27244667	3.10E-24	-0.436356495	2.13E-63	-0.129010396	2.16E-06	-0.302947365	7.67E-30	0.036764215	0.178628472	-0.323873662	4.26E-34	0.046183716	0.091042192
TOMM7	translocase of outer mitochondrial membrane 7 homolog (yeast)	54543	yellow	-0.075167293	0.005906956	-0.271258361	4.96E-24	0.468503565	4.63E-74	0.206431418	2.31E-14	0.84446683	0	0.464907624	8.24E-73	0.151185709	2.68E-08	0.215750766	1.41E-15	0.235001589	2.86E-18	-0.103362223	0.000150463	0.275163636	1.05E-24	0.189970967	2.36E-12	-0.061238804	0.024979447	-0.184177925	1.09E-11	-0.077295289	0.004639288	-0.204933227	3.58E-14	0.081436049	0.002852303	-0.301071867	1.78E-29	-0.034291917	0.209664774
RPL9	ribosomal protein L9	6133	yellow	-0.055366175	0.042724037	-0.30001576	2.84E-29	0.465051919	7.35E-73	0.033432108	0.2213237	0.767927059	4.07E-261	0.538759981	9.79E-102	0.099698662	0.000256907	0.052385076	0.055220726	0.245126209	8.71E-20	0.023882591	0.382360595	0.396819959	9.04E-52	0.155546119	1.04E-08	-0.139627502	2.87E-07	-0.311225208	1.75E-31	-0.08955899	0.001030975	-0.21674036	1.04E-15	0.228133495	2.79E-17	-0.11524068	2.35E-05	-0.007991724	0.770075019
CTSL1	cathepsin L1	1514	yellow	0.097878126	0.000332966	-0.26586075	4.09E-23	0.460473596	2.74E-71	-0.042455826	0.120330361	0.580918897	9.16E-122	0.605983205	3.94E-135	0.325359078	2.06E-34	0.190367697	2.12E-12	0.261518001	2.16E-22	0.115848878	2.13E-05	0.557162271	3.99E-110	-0.071823435	0.008535648	-0.326576372	1.13E-34	-0.374833238	5.93E-46	-0.11987794	1.08E-05	-0.358488334	6.55E-42	0.050561566	0.064268386	-0.357447075	1.16E-41	-0.025018144	0.360137564
RPS5	ribosomal protein S5	6193	yellow	-0.063686468	0.019727067	-0.408518902	4.75E-55	0.457601623	2.57E-70	0.019754899	0.469960292	0.837224023	0	0.583969551	2.49E-123	0.237364464	1.29E-18	0.182670361	1.61E-11	0.355565781	3.27E-41	0.133276778	9.78E-07	0.62081229	1.29E-143	0.145517484	8.78E-08	-0.202988848	6.29E-14	-0.358367922	7.00E-42	-0.057191604	0.03632094	-0.248061752	3.07E-20	0.121115692	8.76E-06	-0.236526166	1.71E-18	0.041369047	0.130129738
MRPL23	mitochondrial ribosomal protein L23	6150	yellow	-0.090292311	0.000936575	-0.251205497	9.89E-21	0.455180414	1.67E-69	0.272580423	2.94E-24	0.600517242	4.09E-132	0.183541038	1.29E-11	-0.014335436	0.600069674	0.111759447	4.13E-05	0.241760558	2.83E-19	-0.222533739	1.69E-16	0.335629563	1.22E-36	0.009495682	0.728379108	-0.109098846	6.28E-05	-0.323336225	5.53E-34	0.148197687	5.04E-08	-0.056011319	0.040359852	0.211149104	5.70E-15	-0.301959743	1.19E-29	-0.073845131	0.006843902
RPL17	ribosomal protein L17	6139	yellow	-0.041656523	0.127479334	-0.329248664	3.02E-35	0.446827569	9.54E-67	-0.033167293	0.225006343	0.768849389	4.01E-262	0.590158755	1.48E-126	0.173613563	1.57E-10	0.117115497	1.72E-05	0.258219539	7.47E-22	0.126591892	3.35E-06	0.506392054	3.52E-88	0.16413586	1.51E-09	-0.193705082	8.55E-13	-0.308379116	6.50E-31	-0.145298731	9.18E-08	-0.304528854	3.76E-30	0.104460606	0.000127726	-0.199430251	1.74E-13	0.011724416	0.668070028
SNRPA	small nuclear ribonucleoprotein polypeptide A	6626	yellow	-0.054125561	0.047599801	-0.330251494	1.84E-35	0.442669488	2.11E-65	0.19761541	2.89E-13	0.501305829	3.52E-86	0.427682286	1.03E-60	0.076137831	0.005294464	0.082784055	0.00242318	0.325151011	2.28E-34	0.236957264	1.48E-18	0.68796268	1.70E-188	-0.077238812	0.004669471	-0.375958282	3.06E-46	-0.434713875	6.96E-63	-0.062977582	0.021138847	-0.327146453	8.57E-35	0.053084148	0.052045735	-0.279606244	1.72E-25	0.029739369	0.276655016
RPL27	ribosomal protein L27	6155	yellow	-0.083914801	0.002109667	-0.242679803	2.06E-19	0.442157401	3.07E-65	0.172109555	2.27E-10	0.831851131	0	0.480039061	3.58E-78	0.157001433	7.57E-09	0.207632798	1.62E-14	0.216289849	1.19E-15	-0.044205666	0.105776085	0.281036642	9.59E-26	0.244290246	1.17E-19	-0.058528843	0.032165758	-0.142873029	1.50E-07	-0.078338746	0.004112471	-0.246574912	5.21E-20	0.037821947	0.166446169	-0.282017685	6.40E-26	-0.012341629	0.651720469
LOC100287430	ribosomal protein S5 pseudogene	100287430	yellow	-0.076193877	0.00526091	-0.379876554	3.01E-47	0.441916138	3.67E-65	0.025742318	0.346397371	0.786070936	8.20E-282	0.546721682	2.66E-105	0.215352672	1.59E-15	0.161440475	2.80E-09	0.330516757	1.61E-35	0.116729768	1.84E-05	0.584201721	1.89E-123	0.13792635	4.01E-07	-0.202302314	7.66E-14	-0.347504121	2.53E-39	-0.046275999	0.090397238	-0.260457722	3.22E-22	0.079001982	0.003806441	-0.26304152	1.21E-22	0.035664673	0.191982049
LOC729859	WW domain binding protein 1 pseudogene	729859	yellow	-0.156102261	9.24E-09	-0.414047827	1.20E-56	0.440946592	7.49E-65	0.188817572	3.21E-12	0.647670902	3.32E-160	0.370606097	6.94E-45	0.144903498	9.96E-08	0.229534235	1.76E-17	0.357616715	1.06E-41	0.103910534	0.000138675	0.705671112	1.89E-202	-0.113092443	3.33E-05	-0.233347255	4.99E-18	-0.430512572	1.40E-61	0.026920912	0.324758693	-0.216836096	1.01E-15	0.080206731	0.003302914	-0.306556432	1.50E-30	-0.056439577	0.038852434
C17orf61	chromosome 17 open reading frame 61	254863	yellow	-0.101773834	0.000190154	-0.306840334	1.32E-30	0.439378428	2.36E-64	0.05495099	0.04430656	0.808589687	1.68280077250374e-310	0.534386283	8.12E-100	0.363183425	4.77E-43	0.2611945	2.44E-22	0.232921386	5.75E-18	-0.095819411	0.000444117	0.360999127	1.62E-42	0.155388721	1.08E-08	-0.096191765	0.000421744	-0.198717297	2.12E-13	0.005278873	0.846912373	-0.172998095	1.83E-10	0.044710941	0.101843794	-0.361540219	1.20E-42	-0.052830545	0.053179438
ZP3	zona pellucida glycoprotein 3 (sperm receptor)	7784	yellow	0.050781408	0.063116629	-0.102042395	0.000182816	0.437823694	7.34E-64	0.150863731	2.87E-08	0.445608103	2.38E-66	0.337536959	4.61E-37	0.00919677	0.736606955	-0.039810974	0.145243857	0.303705156	5.45E-30	0.249942002	1.56E-20	0.58958276	2.98E-126	0.0159555	0.559516875	-0.21998389	3.79E-16	-0.28013453	1.39E-25	-0.039555992	0.147840322	-0.246432699	5.48E-20	0.018549775	0.497481389	-0.24815393	2.97E-20	0.057767389	0.034478896
RPS3A	ribosomal protein S3A	6189	yellow	-0.114187486	2.79E-05	-0.355342957	3.69E-41	0.432057607	4.66E-62	-0.013660102	0.617357829	0.700419537	3.33E-198	0.438164817	5.73E-64	0.080625049	0.00314278	0.00558139	0.838257131	0.249445672	1.87E-20	-0.059640116	0.029028983	0.413812001	1.41E-56	0.115124211	2.40E-05	-0.143253638	1.39E-07	-0.396106841	1.42E-51	0.071932386	0.008435739	-0.066147864	0.015443747	0.388443698	1.68E-49	0.006917592	0.800274269	-0.037224605	0.173246929
LOC100294376	similar to hCG16318	100294376	yellow	0.260001837	3.83E-22	-0.195423119	5.33E-13	0.431638842	6.29E-62	-0.243309458	1.65E-19	0.588035659	1.93E-125	0.588747245	8.18E-126	0.383669804	3.08E-48	0.131040732	1.49E-06	0.343010664	2.71E-38	0.334722416	1.94E-36	0.711343293	3.84E-207	0.025220316	0.356267675	-0.262696383	1.38E-22	-0.312974253	7.74E-32	-0.045421596	0.096510867	-0.242411807	2.26E-19	-0.005239264	0.848047028	-0.285946469	1.24E-26	0.025577965	0.349486127
RPL10A	ribosomal protein L10a	4736	yellow	-0.174303779	1.33E-10	-0.292231416	8.58E-28	0.429876225	2.20E-61	0.099779169	0.000253952	0.755295395	8.55E-248	0.407452064	9.57E-55	0.070702988	0.009626085	0.041238046	0.131351595	0.277171662	4.65E-25	-0.105891164	0.000102939	0.309383268	4.10E-31	0.208982122	1.09E-14	-0.0604968	0.026793833	-0.254500744	2.97E-21	0.003660378	0.893507551	-0.112244883	3.82E-05	0.254268954	3.23E-21	-0.072516369	0.007917817	0.019446053	0.476932205
PAAF1	proteasomal ATPase-associated factor 1	80227	yellow	-0.082938286	0.002378045	-0.397344242	6.49E-52	0.429393487	3.09E-61	0.021561737	0.430319956	0.678679035	1.42E-181	0.555262719	3.10E-109	0.34599879	5.63E-39	0.231304493	9.84E-18	0.328011265	5.59E-35	0.121375973	8.37E-06	0.645772125	5.62E-159	-0.100128922	0.000241482	-0.236663401	1.63E-18	-0.386443021	5.72E-49	-0.155129253	1.14E-08	-0.320729681	1.95E-33	0.05541547	0.042539354	-0.320238813	2.47E-33	-0.028682243	0.294095976
ITGAE	integrin, alpha E (antigen CD103, human mucosal lymphocyte antigen 1; alpha polypeptide)	3682	yellow	-0.112975724	3.40E-05	-0.426896327	1.79E-60	0.428709216	5.01E-61	0.147414871	5.93E-08	0.649281463	2.97E-161	0.568180302	2.09E-115	0.162595194	2.15E-09	0.095857601	0.000441772	0.341515067	5.91E-38	0.02924996	0.284639996	0.436989605	1.35E-63	0.059861795	0.028435755	-0.269129492	1.15E-23	-0.391866389	2.02E-50	-0.046489404	0.08891985	-0.22310687	1.41E-16	0.221798266	2.14E-16	-0.138322268	3.71E-07	0.07423201	0.006556812
RPS4Y2	ribosomal protein S4, Y-linked 2	140032	yellow	-0.040178431	0.141563639	-0.34253605	3.47E-38	0.428230296	7.02E-61	0.094729859	0.000516102	0.624756941	5.96E-146	0.54917172	2.03E-106	0.052429792	0.055012921	0.069383619	0.011067849	0.181247434	2.33E-11	0.072787866	0.007686867	0.377672258	1.11E-46	0.112371819	3.74E-05	-0.298420719	5.77E-29	-0.369085941	1.67E-44	-0.064302028	0.01856859	-0.268298206	1.59E-23	0.192282231	1.26E-12	-0.156823553	7.88E-09	-0.037518758	0.169872502
EIF1	eukaryotic translation initiation factor 1	10209	yellow	-0.122221089	7.23E-06	-0.43666842	1.70E-63	0.427523237	1.15E-60	0.114804844	2.52E-05	0.833307009	0	0.684368375	8.73E-186	0.357260365	1.29E-41	0.305208587	2.76E-30	0.299004929	4.45E-29	0.037651226	0.168369038	0.370112834	9.23E-45	0.141288247	2.07E-07	-0.158236064	5.76E-09	-0.25875721	6.11E-22	-0.089179134	0.001083262	-0.226131084	5.35E-17	0.075327714	0.005801509	-0.288287698	4.63E-27	0.009254967	0.735002633
LOC148430	ribosomal protein S2 pseudogene	148430	yellow	-0.244976339	9.18E-20	-0.45186307	2.13E-68	0.426782545	1.94E-60	0.230104752	1.46E-17	0.7243742	2.28E-218	0.384039217	2.46E-48	0.122717185	6.64E-06	0.175070661	1.10E-10	0.363422116	4.17E-43	0.055831851	0.04100613	0.631484999	5.18E-150	0.024269213	0.374701752	-0.170347285	3.48E-10	-0.381373415	1.23E-47	0.036012097	0.187685725	-0.196476868	3.98E-13	0.095288183	0.000477957	-0.264559761	6.75E-23	-0.017552477	0.520888771
POLR2G	polymerase (RNA) II (DNA directed) polypeptide G	5436	yellow	-0.190194202	2.22E-12	-0.432160173	4.34E-62	0.4247346	8.11E-60	0.070320012	0.010026304	0.823143658	0	0.677096047	2.03E-180	0.443204588	1.42E-65	0.284314091	2.46E-26	0.222914648	1.50E-16	0.018604471	0.49621401	0.461096221	1.68E-71	0.162419121	2.24E-09	-0.219701406	4.14E-16	-0.278966996	2.24E-25	-0.04609331	0.091677598	-0.250114453	1.47E-20	0.051416081	0.059886853	-0.344453717	1.27E-38	-0.08388715	0.002116868
DNPEP	aspartyl aminopeptidase	23549	yellow	-0.094035214	0.000567518	-0.305810024	2.10E-30	0.423976241	1.37E-59	0.317975052	7.31E-33	0.594476868	7.55E-129	0.251567072	8.68E-21	0.078281128	0.004140083	0.334648072	2.01E-36	0.2518393	7.86E-21	0.00813803	0.765987305	0.526256335	2.52E-96	-0.075599491	0.005626729	-0.212780533	3.49E-15	-0.324691501	2.86E-34	0.014540501	0.594863754	-0.209952509	8.16E-15	-0.034977583	0.200690631	-0.472450313	1.89E-75	-0.110198458	5.29E-05
EEF1G	eukaryotic translation elongation factor 1 gamma	1937	yellow	-0.109056852	6.32E-05	-0.462005507	8.20E-72	0.419536286	2.92E-58	0.092146959	0.000732353	0.82994789	0	0.544898259	1.78E-104	0.223356661	1.30E-16	0.276836812	5.32E-25	0.302182271	1.08E-29	0.205516049	3.02E-14	0.662264754	6.07E-170	0.14484911	1.01E-07	-0.224726672	8.41E-17	-0.321361812	1.44E-33	-0.110181108	5.30E-05	-0.339265478	1.89E-37	0.013745262	0.615165786	-0.277386605	4.26E-25	-0.024278425	0.374520439
SNHG8	small nucleolar RNA host gene 8 (non-protein coding)	100093630	yellow	-0.288535286	4.17E-27	-0.367122351	5.13E-44	0.418120918	7.68E-58	0.269624405	9.44E-24	0.74059206	2.82E-233	0.456103546	8.21E-70	0.026149229	0.338825148	0.093013319	0.000651868	0.232477445	6.67E-18	-0.059464252	0.029507148	0.266598869	3.07E-23	0.235213648	2.66E-18	-0.127239455	2.98E-06	-0.219030635	5.10E-16	-0.114676466	2.58E-05	-0.222077475	1.96E-16	0.138305228	3.72E-07	-0.14674403	6.82E-08	0.041024367	0.133363633
RPL5	ribosomal protein L5	6125	yellow	-0.081198799	0.002934637	-0.401261842	5.33E-53	0.413988213	1.25E-56	0.009897815	0.717359309	0.807275593	0.00E+00	0.657299169	1.44E-166	0.22246425	1.73E-16	0.183006282	1.48E-11	0.262581829	1.44E-22	0.178201605	5.04E-11	0.489372301	1.29E-81	0.226346685	4.99E-17	-0.210301252	7.35E-15	-0.277320254	4.38E-25	-0.179440893	3.68E-11	-0.350537079	5.00E-40	0.068597742	0.012014939	-0.170732756	3.17E-10	0.026918216	0.324807163
PMF1	polyamine-modulated factor 1	11243	yellow	-0.070911956	0.009413763	-0.357612748	1.06E-41	0.411946386	4.90E-56	-0.038646515	0.157390473	0.593945008	1.45E-128	0.503817549	3.66E-87	0.261276468	2.36E-22	0.14234348	1.67E-07	0.393137946	9.15E-51	0.262863276	1.29E-22	0.750753321	3.35E-243	-0.044901254	0.100393177	-0.238389555	9.06E-19	-0.408136445	6.11E-55	-0.047530901	0.081986233	-0.215642295	1.46E-15	0.072325642	0.008083751	-0.241848899	2.75E-19	0.091516686	0.000796597
SCNM1	sodium channel modifier 1	79005	yellow	0.083386737	0.00225114	-0.278476352	2.74E-25	0.411872696	5.15E-56	-0.020373505	0.456166495	0.650290862	6.50E-162	0.575008251	8.85E-119	0.268567794	1.43E-23	0.141155423	2.12E-07	0.22104756	2.71E-16	0.192350802	1.24E-12	0.469738664	1.71E-74	0.099363914	0.000269541	-0.199310177	1.80E-13	-0.266653315	3.01E-23	0.06965717	0.010754076	-0.133185648	9.95E-07	0.159501569	4.33E-09	-0.17880379	4.33E-11	-0.094452633	0.000536078
NUBP1	nucleotide binding protein 1 (MinD homolog, E. coli)	4682	yellow	0.166626246	8.42E-10	-0.194964515	6.05E-13	0.408411606	5.10E-55	-0.103784775	0.000141299	0.491027028	3.07E-82	0.462106863	7.57E-72	0.156786851	7.94E-09	0.068731948	0.011848289	0.403092311	1.64E-53	0.180614059	2.73E-11	0.531972879	9.04E-99	-0.031044239	0.256116096	-0.217223053	8.95E-16	-0.316248682	1.66E-32	-0.195262975	5.57E-13	-0.282732205	4.76E-26	0.039456231	0.148865761	-0.264035523	8.26E-23	0.22067536	3.05E-16
EMG1	EMG1 nucleolar protein homolog (S. cerevisiae)	10436	yellow	-0.055698876	0.041490616	-0.164234116	1.47E-09	0.407852813	7.36E-55	0.123738787	5.55E-06	0.662589927	3.63E-170	0.390216565	5.63E-50	0.224266298	9.74E-17	0.317858957	7.72E-33	0.185221972	8.31E-12	-0.147378401	5.98E-08	0.193530777	8.97E-13	0.141346859	2.04E-07	-0.091655153	0.00078205	-0.074368399	0.006458211	-0.173288129	1.70E-10	-0.21756242	8.06E-16	-0.116760044	1.83E-05	-0.499487452	1.79E-85	-0.011642853	0.670242597
ASB1	ankyrin repeat and SOCS box-containing 1	51665	yellow	-0.249588744	1.77E-20	-0.322316953	9.08E-34	0.405732909	2.95E-54	0.21971185	4.12E-16	0.611679212	2.45E-138	0.40679659	1.47E-54	0.207491989	1.69E-14	0.196542462	3.90E-13	0.242361953	2.30E-19	0.065233155	0.016929232	0.531044282	2.27E-98	0.003283021	0.904430491	-0.172223929	2.21E-10	-0.228973073	2.12E-17	-0.179826213	3.34E-11	-0.362941042	5.47E-43	-0.094181821	0.000556285	-0.405870265	2.70E-54	-0.025044006	0.359641054
C1orf122	chromosome 1 open reading frame 122	127687	yellow	-0.095802977	0.00044513	-0.36443433	2.36E-43	0.401426932	4.79E-53	0.02432373	0.37362946	0.821384469	0	0.541663717	5.03E-103	0.453209956	7.60E-69	0.350934084	4.04E-40	0.262690343	1.38E-22	-0.0309186	0.258046358	0.460214489	3.35E-71	0.091049132	0.000847588	-0.08162793	0.00278726	-0.232214315	7.28E-18	0.059172653	0.030314906	-0.109995213	5.46E-05	0.10280066	0.000163509	-0.299433693	3.68E-29	-0.09935427	0.000269914
PRDX4	peroxiredoxin 4	10549	yellow	-0.190471275	2.06E-12	-0.536532529	9.37E-101	0.401358955	5.00E-53	-0.034421514	0.207946709	0.84605746	0	0.765756667	9.09E-259	0.459115311	7.92E-71	0.300428187	2.37E-29	0.280572757	1.16E-25	0.09927575	0.000272964	0.500757985	5.75E-86	0.20658656	2.21E-14	-0.264769656	6.23E-23	-0.325673194	1.77E-34	-0.050144327	0.066501962	-0.257334907	1.04E-21	0.095896107	0.00043942	-0.236233252	1.89E-18	-0.002837856	0.917339292
RPL7	ribosomal protein L7	6129	yellow	-0.148504786	4.72E-08	-0.40026312	1.01E-52	0.396584816	1.05E-51	-0.014805555	0.588165626	0.712076475	9.32E-208	0.476033262	9.99E-77	0.090386354	0.000925065	0.010766784	0.693748935	0.246781534	4.85E-20	-0.099669436	0.000257987	0.337942025	3.74E-37	0.171159228	2.86E-10	-0.135637139	6.24E-07	-0.365749022	1.12E-43	0.060108721	0.027787271	-0.046943661	0.085839762	0.422503626	3.81E-59	0.093815871	0.000584718	-0.022108634	0.418715085
LOC100130107	hypothetical LOC100130107	100130107	yellow	-0.139698571	2.83E-07	-0.35882813	5.43E-42	0.396243801	1.30E-51	0.016212703	0.553202921	0.79857877	2.69E-297	0.477032258	4.37E-77	0.134976115	7.08E-07	0.112976677	3.40E-05	0.295835513	1.80E-28	-0.019621161	0.472972365	0.375178294	4.85E-46	0.260052742	3.75E-22	-0.069153363	0.011338231	-0.248739744	2.41E-20	-0.012590028	0.645186902	-0.109482313	5.92E-05	0.219569497	4.31E-16	-0.081816607	0.002724625	0.053890857	0.04857291
ARL2	ADP-ribosylation factor-like 2	402	yellow	-0.008313951	0.761080811	-0.313190353	6.99E-32	0.395159382	2.58E-51	0.20695637	1.98E-14	0.645461436	8.91E-159	0.368847588	1.91E-44	0.274823991	1.20E-24	0.154857116	1.21E-08	0.304290448	4.19E-30	-0.018687279	0.494298527	0.470349444	1.04E-74	0.09760206	0.000346189	-0.206853263	2.04E-14	-0.245390083	7.93E-20	0.127452363	2.87E-06	-0.12396597	5.33E-06	0.025957224	0.342384854	-0.359380612	4.00E-42	-0.06059454	0.026548514
RPS14	ribosomal protein S14	6208	yellow	-0.123403821	5.89E-06	-0.33262729	5.58E-36	0.391985999	1.88E-50	0.084264243	0.002020577	0.850618884	0	0.476625985	6.12E-77	0.24982314	1.63E-20	0.247953228	3.19E-20	0.242467446	2.21E-19	-0.064987706	0.017348569	0.350451159	5.24E-40	0.1884994	3.50E-12	-0.020937574	0.443789516	-0.202842342	6.56E-14	0.015010242	0.583016956	-0.136326303	5.47E-07	0.154747859	1.24E-08	-0.191079952	1.75E-12	-0.037254146	0.172905799
LSM2	LSM2 homolog, U6 small nuclear RNA associated (S. cerevisiae)	57819	yellow	0.030817971	0.25959963	-0.310765602	2.16E-31	0.388469737	1.65E-49	-0.131873649	1.27E-06	0.538521648	1.25E-101	0.501800735	2.26E-86	0.25800017	8.11E-22	0.092617153	0.000687594	0.457129249	3.71E-70	0.255834504	1.81E-21	0.674554168	1.40E-178	-0.047382794	0.082944658	-0.217174154	9.09E-16	-0.403726867	1.09E-53	-0.059607241	0.029117859	-0.196583424	3.86E-13	0.120119572	1.04E-05	-0.143361172	1.36E-07	0.175561476	9.74E-11
DPH5	DPH5 homolog (S. cerevisiae)	51611	yellow	-0.237941866	1.06E-18	-0.474900002	2.54E-76	0.387230655	3.53E-49	0.125581169	4.01E-06	0.687441814	4.23E-188	0.560272296	1.35E-111	0.242797623	1.97E-19	0.206730327	2.12E-14	0.240642002	4.17E-19	-0.032561176	0.233599329	0.405078237	4.52E-54	0.097391167	0.00035662	-0.230839215	1.15E-17	-0.352931018	1.37E-40	0.007216699	0.791832721	-0.144603875	1.06E-07	0.221708596	2.20E-16	-0.146543469	7.11E-08	-0.034053659	0.212850105
LOC100289874	similar to ribosomal protein SA	100289874	yellow	-0.097836754	0.000334917	-0.438924317	3.29E-64	0.386194915	6.65E-49	0.079026268	0.003795638	0.710205935	3.42E-206	0.485997661	2.33E-80	0.203850206	4.90E-14	0.170913096	3.03E-10	0.242910676	1.90E-19	0.066153352	0.015435191	0.551901143	1.13E-107	-0.016434228	0.5477929	-0.185943602	6.88E-12	-0.410758436	1.08E-55	0.067550663	0.013387996	-0.165405107	1.12E-09	0.243602033	1.49E-19	-0.1021519	0.000179902	-0.107839222	7.64E-05
LOC100289173	hypothetical protein LOC100289173	100289173	yellow	-0.111768345	4.12E-05	-0.402144961	3.02E-53	0.385201515	1.22E-48	0.034001414	0.21355322	0.845811938	0	0.555413716	2.64E-109	0.292934245	6.33E-28	0.248116408	3.01E-20	0.285894486	1.27E-26	0.092983518	0.000654494	0.495119062	8.60E-84	0.258463916	6.82E-22	-0.1622327	2.33E-09	-0.24830862	2.81E-20	-0.030471047	0.265004146	-0.190802839	1.88E-12	0.038111827	0.16321903	-0.290663818	1.68E-27	0.000386393	0.98872537
RPL29	ribosomal protein L29	6159	yellow	-0.203897389	4.84E-14	-0.428117219	7.60E-61	0.385111905	1.29E-48	0.112895483	3.44E-05	0.878544655	0	0.476360721	7.62E-77	0.244973987	9.19E-20	0.250150576	1.45E-20	0.239200947	6.86E-19	-0.000929351	0.972886637	0.462001271	8.23E-72	0.258309845	7.22E-22	-0.10334185	0.000150919	-0.22203279	1.98E-16	0.035650553	0.192158173	-0.182935854	1.51E-11	0.089446453	0.001046217	-0.222269587	1.84E-16	-0.047740494	0.080645278
HSBP1	heat shock factor binding protein 1	3281	yellow	-0.217198779	9.02E-16	-0.473219631	1.01E-75	0.383621347	3.17E-48	0.05797391	0.033837914	0.813895799	8.0617778376337e-318	0.643128095	2.78E-157	0.376495639	2.23E-46	0.379782613	3.18E-47	0.208020115	1.45E-14	-0.077531935	0.004514727	0.295473324	2.10E-28	0.162792397	2.05E-09	-0.151049388	2.76E-08	-0.240462963	4.44E-19	-0.073688453	0.006963343	-0.206422566	2.32E-14	0.071223728	0.009104739	-0.29769864	7.93E-29	-0.046311697	0.090148741
RPL3	ribosomal protein L3	6122	yellow	-0.04635758	0.089830148	-0.404582271	6.23E-54	0.380418016	2.18E-47	-0.027075778	0.321982152	0.770850584	2.54E-264	0.477377685	3.28E-77	0.187460309	4.61E-12	0.170495776	3.36E-10	0.303922382	4.94E-30	0.191900575	1.40E-12	0.601847467	7.64E-133	0.112061232	3.94E-05	-0.119263498	1.20E-05	-0.321729574	1.21E-33	-0.044774629	0.101356507	-0.225972439	5.63E-17	0.109736452	5.69E-05	-0.133192995	9.93E-07	0.011213859	0.681714669
LOC100294217	similar to ribosomal protein L3	100294217	yellow	-0.042640781	0.118721657	-0.382502734	6.23E-48	0.378875852	5.46E-47	-0.034684178	0.204495897	0.598785666	3.59E-131	0.422453024	3.94E-59	0.125618318	3.98E-06	0.094554563	0.000528652	0.34937914	9.31E-40	0.178697624	4.45E-11	0.634015158	1.45E-151	-0.037659645	0.168273825	-0.215232835	1.65E-15	-0.415651123	4.09E-57	-0.086456279	0.001535978	-0.266552688	3.13E-23	0.113408972	3.17E-05	-0.160335613	3.59E-09	0.037887111	0.165716575
MRPS16	mitochondrial ribosomal protein S16	51021	yellow	-0.138478572	3.60E-07	-0.364238693	2.63E-43	0.378175032	8.27E-47	0.100173212	0.000239944	0.737175289	4.82E-230	0.45377905	4.91E-69	0.250817329	1.14E-20	0.300110649	2.73E-29	0.23187957	8.13E-18	-0.05137837	0.060074853	0.374982622	5.44E-46	0.145278964	9.22E-08	-0.125346417	4.18E-06	-0.226050699	5.49E-17	0.056279311	0.039410861	-0.145714105	8.43E-08	0.114559113	2.63E-05	-0.247291825	4.04E-20	-0.054365874	0.046620455
SF3B2	splicing factor 3b, subunit 2, 145kDa	10992	yellow	-0.100063088	0.000243784	-0.29057127	1.75E-27	0.377270613	1.41E-46	0.205746165	2.83E-14	0.561694003	2.84E-112	0.447442124	6.02E-67	0.166109868	9.51E-10	0.090307275	0.000934734	0.212985841	3.28E-15	0.254050412	3.50E-21	0.596178174	9.23E-130	0.09381635	0.00058468	-0.28217876	5.98E-26	-0.223077017	1.42E-16	-0.12304567	6.27E-06	-0.443174662	1.45E-65	-0.112899265	3.44E-05	-0.340000485	1.30E-37	-0.030934832	0.257796406
RPL23	ribosomal protein L23	9349	yellow	-0.093843248	0.000582545	-0.328651097	4.07E-35	0.375965317	3.05E-46	-0.00889903	0.744832628	0.775645868	1.10E-269	0.572874451	1.02E-117	0.19931161	1.80E-13	0.156361627	8.72E-09	0.185335648	8.07E-12	-0.034849485	0.202345579	0.247480007	3.78E-20	0.237940726	1.06E-18	-0.072142639	0.008245883	-0.190625393	1.98E-12	-0.084348086	0.001999721	-0.161743116	2.61E-09	0.236416024	1.77E-18	-0.035703242	0.191501554	-0.038215287	0.162078721
AKR7L	aldo-keto reductase family 7-like	246181	yellow	-0.153125408	1.77E-08	-0.430684783	1.24E-61	0.374723384	6.33E-46	0.136349403	5.44E-07	0.651899376	5.70E-163	0.412998206	2.43E-56	0.203150362	6.00E-14	0.347315901	2.80E-39	0.287377744	6.81E-27	0.137043764	4.76E-07	0.669931273	2.78E-175	-0.005138416	0.850937312	-0.228788385	2.25E-17	-0.365600121	1.22E-43	-0.021468791	0.432310604	-0.268674133	1.37E-23	0.042929212	0.116246602	-0.31605906	1.81E-32	-0.058370742	0.032634794
PRDX1	peroxiredoxin 1	5052	yellow	-0.099074445	0.000280933	-0.394914042	3.01E-51	0.373379333	1.39E-45	-0.087975545	0.001265546	0.747671613	3.85E-240	0.57350466	4.98E-118	0.387978417	2.23E-49	0.42038064	1.64E-58	0.216164915	1.24E-15	-0.001057401	0.969152586	0.481481748	1.07E-78	0.110171256	5.31E-05	-0.236601784	1.67E-18	-0.277916829	3.44E-25	-0.132152483	1.21E-06	-0.295709022	1.90E-28	-0.005646593	0.836394131	-0.402926534	1.82E-53	-0.079210209	0.003714715
ROMO1	reactive oxygen species modulator 1	140823	yellow	-0.062330427	0.022503644	-0.255994925	1.71E-21	0.369744446	1.14E-44	0.114694725	2.57E-05	0.784487535	6.30E-280	0.355755808	2.95E-41	0.215219242	1.66E-15	0.292037961	9.32E-28	0.208005294	1.46E-14	-0.141204528	2.10E-07	0.256848817	1.25E-21	0.276129229	7.09E-25	-0.039895333	0.144392568	-0.085882771	0.001651203	0.029530568	0.280042867	-0.129581396	1.94E-06	-0.013030341	0.633672695	-0.342039911	4.49E-38	-0.027157421	0.320524654
RPL36	ribosomal protein L36	25873	yellow	-0.199746605	1.59E-13	-0.210770028	6.39E-15	0.368461522	2.38E-44	0.168607418	5.27E-10	0.77142989	5.81E-265	0.29408006	3.86E-28	0.100599599	0.000225603	0.158652076	5.24E-09	0.208682215	1.19E-14	-0.111880163	4.05E-05	0.249546308	1.80E-20	0.291973424	9.59E-28	0.029111836	0.286921473	-0.082304628	0.00256853	-0.008611147	0.752813742	-0.124647372	4.73E-06	0.040645923	0.136985477	-0.205532826	3.01E-14	0.006330876	0.816899844
DPM3	dolichyl-phosphate mannosyltransferase polypeptide 3	54344	yellow	0.090864649	0.000868527	-0.223462429	1.26E-16	0.368451903	2.40E-44	0.070561831	0.009771911	0.638826424	1.47E-154	0.448126629	3.60E-67	0.211682115	4.86E-15	0.229766313	1.63E-17	0.220144325	3.60E-16	0.204020929	4.67E-14	0.505191036	1.05E-87	0.220787617	2.94E-16	-0.272635236	2.87E-24	-0.200110398	1.43E-13	-0.003462778	0.899224889	-0.251332875	9.45E-21	-0.106607809	9.23E-05	-0.420689703	1.33E-58	-0.006260492	0.818899991
THNSL2	threonine synthase-like 2 (S. cerevisiae)	55258	yellow	-0.10466388	0.00012389	-0.398562205	2.99E-52	0.367538839	4.04E-44	0.034251989	0.210196173	0.604622086	2.25E-134	0.460129353	3.58E-71	0.341509199	5.93E-38	0.327022918	9.10E-35	0.355222345	3.95E-41	0.099216672	0.000275281	0.64797636	2.11E-160	-0.119859567	1.09E-05	-0.198922384	2.00E-13	-0.357875796	9.19E-42	-0.070251919	0.010098992	-0.249462407	1.86E-20	0.009565217	0.726469522	-0.36587667	1.04E-43	0.029992549	0.272584666
LOC653881	similar to 60S ribosomal protein L3 (L4)	653881	yellow	0.004971495	0.855725635	-0.327059675	8.94E-35	0.366544487	7.13E-44	-0.004341374	0.873847857	0.784111726	1.76E-279	0.48943565	1.22E-81	0.243387785	1.60E-19	0.238643903	8.30E-19	0.293158573	5.75E-28	0.274906005	1.16E-24	0.625758426	1.50E-146	0.225335932	6.91E-17	-0.141565965	1.96E-07	-0.207355908	1.76E-14	-0.112128883	3.89E-05	-0.31809969	6.88E-33	-0.107183265	8.45E-05	-0.315664785	2.19E-32	0.033777017	0.216592216
PPIB	peptidylprolyl isomerase B (cyclophilin B)	5479	yellow	-0.15094361	2.82E-08	-0.383011217	4.59E-48	0.365828688	1.07E-43	-0.058539775	0.032133541	0.586687721	9.74E-125	0.541493675	5.99E-103	0.300080505	2.76E-29	0.151308913	2.61E-08	0.204426105	4.15E-14	0.01867503	0.494581613	0.493903183	2.50E-83	0.128027406	2.58E-06	-0.324299744	3.46E-34	-0.327138008	8.60E-35	-0.042649848	0.118643225	-0.288958167	3.48E-27	0.056508837	0.038613195	-0.294903385	2.70E-28	-0.046869255	0.086338295
RPL8	ribosomal protein L8	6132	yellow	-0.035198502	0.197859721	-0.22496805	7.78E-17	0.364543369	2.22E-43	-0.023594627	0.388126878	0.775538629	1.46E-269	0.387463568	3.06E-49	0.194774953	6.37E-13	0.109865461	5.57E-05	0.244811063	9.73E-20	0.057515278	0.035275398	0.390758103	4.02E-50	0.331786072	8.52E-36	-0.019804656	0.468842336	-0.099529133	0.000263234	0.046494286	0.088886282	-0.075041046	0.00599115	0.071785704	0.008570494	-0.199977117	1.49E-13	0.011520236	0.673513915
CDC26	cell division cycle 26 homolog (S. cerevisiae)	246184	yellow	0.008089618	0.767339196	-0.297195098	9.89E-29	0.358437389	6.74E-42	0.012560034	0.645974385	0.751620345	4.53E-244	0.545957434	5.91E-105	0.231680211	8.69E-18	0.325656372	1.78E-34	0.242444388	2.23E-19	0.137797462	4.11E-07	0.388008397	2.19E-49	0.242010051	2.60E-19	-0.135841001	6.00E-07	-0.156011718	9.42E-09	-0.20622671	2.46E-14	-0.3610501	1.58E-42	-0.09795926	0.00032917	-0.328286043	4.88E-35	0.059899115	0.028336916
LOC100288252	ribosomal protein L10 pseudogene	100288252	yellow	-0.113803701	2.97E-05	-0.456650383	5.38E-70	0.356334955	2.15E-41	-0.039964249	0.143699955	0.83984462	0	0.596935869	3.60E-130	0.333988282	2.81E-36	0.286339505	1.05E-26	0.311407116	1.61E-31	0.210436046	7.06E-15	0.621150796	8.14E-144	0.214743711	1.92E-15	-0.176164872	8.39E-11	-0.274476353	1.38E-24	-0.111850584	4.07E-05	-0.285550356	1.47E-26	-0.029794598	0.275763589	-0.275109447	1.07E-24	0.027211481	0.31956195
NACA	nascent polypeptide-associated complex alpha subunit	4666	yellow	-0.048402359	0.076527132	-0.304008054	4.76E-30	0.349325194	9.59E-40	-0.011593861	0.671548923	0.715541945	1.09E-210	0.582558788	1.33E-122	0.176444375	7.82E-11	0.083185106	0.002307412	0.205810082	2.77E-14	0.061926627	0.023393454	0.253215335	4.76E-21	0.25124778	9.74E-21	-0.073161462	0.007378927	-0.182597388	1.64E-11	-0.078998793	0.003807862	-0.137505293	4.35E-07	0.253923724	3.67E-21	0.032692702	0.231715204	0.01065333	0.696815333
LOC100287260	hypothetical LOC100287260	100287260	yellow	-0.184385209	1.03E-11	-0.287775895	5.75E-27	0.3492564	9.95E-40	0.101566246	0.000196014	0.842550422	0	0.360434613	2.22E-42	0.176124448	8.47E-11	0.285552366	1.47E-26	0.25388758	3.72E-21	-0.157811646	6.33E-09	0.220391688	3.33E-16	0.295530133	2.05E-28	0.048856944	0.073799169	-0.094291413	0.000548024	-0.031596743	0.247746652	-0.079950409	0.003404668	0.047958958	0.079266561	-0.23933727	6.54E-19	0.038539556	0.158543631
EEF1B2	eukaryotic translation elongation factor 1 beta 2	1933	yellow	-0.111028541	4.64E-05	-0.420189353	1.87E-58	0.348813992	1.26E-39	0.10334323	0.000150888	0.827625889	0	0.583567354	4.02E-123	0.307212217	1.11E-30	0.286600635	9.45E-27	0.196104419	4.41E-13	-0.040330983	0.140056959	0.234626427	3.25E-18	0.213259664	3.02E-15	-0.070067332	0.010298401	-0.183548447	1.29E-11	0.011267999	0.680262735	-0.154047997	1.45E-08	0.150598287	3.04E-08	-0.154900614	1.20E-08	-0.059652716	0.028994982
C4orf3	chromosome 4 open reading frame 3	401152	yellow	0.081244439	0.002918632	-0.330351808	1.75E-35	0.348384409	1.58E-39	-0.040908751	0.134462181	0.697669326	5.12E-196	0.65483386	6.45E-165	0.435086263	5.32E-63	0.352742521	1.52E-40	0.234985863	2.88E-18	0.097407824	0.000355786	0.372846194	1.89E-45	0.030518794	0.264255776	-0.144709777	1.04E-07	-0.229700245	1.67E-17	-0.111201748	4.51E-05	-0.235294047	2.59E-18	0.070223146	0.010129848	-0.233546235	4.67E-18	-0.038428639	0.159746195
PNKD	paroxysmal nonkinesigenic dyskinesia	25953	yellow	0.358720495	5.76E-42	-0.114327299	2.73E-05	0.343850589	1.74E-38	-0.198632655	2.17E-13	0.637977225	5.01E-154	0.547599209	1.06E-105	0.334975484	1.70E-36	0.264968508	5.77E-23	0.161160392	2.98E-09	0.297684242	7.98E-29	0.48679619	1.18E-80	0.143240863	1.40E-07	-0.168520279	5.38E-10	-0.152063991	2.22E-08	-0.053801625	0.048947226	-0.253396937	4.45E-21	-0.040125763	0.142086687	-0.295998054	1.67E-28	-0.062693922	0.021727935
BLOC1S1	biogenesis of lysosomal organelles complex-1, subunit 1	2647	yellow	-0.096195719	0.000421512	-0.135113937	6.90E-07	0.343521977	2.07E-38	0.2129067	3.36E-15	0.632433391	1.36E-150	0.286129904	1.15E-26	0.186960765	5.26E-12	0.209287449	9.95E-15	0.249663311	1.73E-20	-0.077273762	0.004650772	0.255174647	2.32E-21	0.21725711	8.86E-16	-0.038720781	0.156593539	-0.031944903	0.242571931	-0.037531034	0.169732753	-0.152593235	1.98E-08	-0.130207539	1.73E-06	-0.441365803	5.51E-65	0.063275838	0.020534482
PGLS	6-phosphogluconolactonase	25796	yellow	-0.248375083	2.74E-20	-0.406240203	2.12E-54	0.341626633	5.57E-38	0.119521473	1.15E-05	0.718068156	7.42E-213	0.412609272	3.15E-56	0.243032974	1.82E-19	0.226049874	5.49E-17	0.295887941	1.75E-28	0.174661241	1.22E-10	0.628632279	2.81E-148	0.120776824	9.28E-06	-0.12885397	2.22E-06	-0.22131399	2.49E-16	-0.011291858	0.679623263	-0.235407177	2.50E-18	-0.043740509	0.109501621	-0.312360727	1.03E-31	0.014149848	0.604798797
CSTB	cystatin B (stefin B)	1476	yellow	-0.058567798	0.032051083	-0.341061233	7.48E-38	0.3378582	3.91E-37	0.130914518	1.52E-06	0.727304743	5.56E-221	0.477194684	3.82E-77	0.309356097	4.15E-31	0.466345306	2.62E-73	0.158827964	5.04E-09	-0.023471224	0.390614047	0.316559563	1.43E-32	0.224535712	8.94E-17	-0.213650535	2.68E-15	-0.139612149	2.88E-07	-0.09837118	0.000310515	-0.265876511	4.07E-23	-0.0823489	0.002554782	-0.432172476	4.30E-62	-0.093160449	0.000639045
C11orf10	chromosome 11 open reading frame 10	746	yellow	-0.134429605	7.86E-07	-0.362372157	7.53E-43	0.335395393	1.38E-36	-0.009768153	0.720906207	0.824495863	0	0.555818396	1.70E-109	0.45087443	4.51E-68	0.274094163	1.61E-24	0.216829125	1.01E-15	-0.079036731	0.003790993	0.292239305	8.55E-28	0.334231826	2.48E-36	-0.1045995	0.000125093	-0.123418586	5.87E-06	0.021825044	0.424709605	-0.10545568	0.000109958	-0.021650363	0.428426792	-0.349182412	1.03E-39	-0.008889218	0.745104203
DAD1	defender against cell death 1	1603	yellow	-0.106692392	9.11E-05	-0.43721209	1.14E-63	0.333669384	3.30E-36	0.009868184	0.71816933	0.791172735	5.33E-288	0.693942689	4.29E-193	0.502445003	1.26E-86	0.417858526	9.17E-58	0.18644848	6.02E-12	-0.003125334	0.909000353	0.332395912	6.27E-36	0.20410509	4.56E-14	-0.208570238	1.23E-14	-0.182172509	1.83E-11	-0.108035611	7.41E-05	-0.230004375	1.51E-17	0.013319935	0.626147601	-0.338731442	2.49E-37	-0.065782422	0.016022891
EIF3D	eukaryotic translation initiation factor 3, subunit D	8664	yellow	-0.101929947	0.000185856	-0.231912506	8.04E-18	0.329865017	2.23E-35	0.079619651	0.003540182	0.6469739	9.41E-160	0.414986089	6.40E-57	0.166043732	9.65E-10	0.089497948	0.001039217	0.308074116	7.48E-31	0.231818159	8.30E-18	0.469765924	1.67E-74	0.256140383	1.62E-21	-0.07192036	0.008446716	-0.103477992	0.000147899	-0.123148399	6.16E-06	-0.249590399	1.77E-20	-0.179543476	3.59E-11	-0.35467585	5.32E-41	0.14276872	1.54E-07
RNASEH2C	ribonuclease H2, subunit C	84153	yellow	-0.293365978	5.26E-28	-0.345503134	7.31E-39	0.329851413	2.24E-35	0.14038408	2.47E-07	0.747013332	1.71E-239	0.397435597	6.12E-52	0.332609676	5.63E-36	0.239623061	5.93E-19	0.235817993	2.17E-18	-0.108864852	6.52E-05	0.328907348	3.58E-35	0.204218363	4.41E-14	-0.029449419	0.281367108	-0.133406421	9.54E-07	0.120948033	9.01E-06	-0.021868153	0.423795152	0.016128179	0.555273991	-0.320623106	2.06E-33	-0.018691545	0.494199937
C9orf119	chromosome 9 open reading frame 119	375757	yellow	-0.18620125	6.43E-12	-0.473204366	1.02E-75	0.328862032	3.67E-35	0.107633267	7.89E-05	0.756026708	1.52E-248	0.447307178	6.66E-67	0.315758669	2.09E-32	0.339466776	1.71E-37	0.340361747	1.07E-37	0.072381161	0.008035131	0.559653031	2.66E-111	0.137897507	4.03E-07	-0.139335588	3.04E-07	-0.250349186	1.35E-20	0.016359416	0.549617007	-0.197293234	3.17E-13	0.012261017	0.65384658	-0.296993242	1.08E-28	0.027450065	0.315335806
RPSAP52	ribosomal protein SA pseudogene 52	204010	yellow	-0.110198133	5.29E-05	-0.431475445	7.06E-62	0.328058013	5.46E-35	0.067187441	0.013895681	0.722592593	8.54E-217	0.480297726	2.88E-78	0.268129677	1.69E-23	0.23273559	6.12E-18	0.215063267	1.74E-15	0.086991309	0.001435199	0.53022111	5.14E-98	0.066149074	0.015441861	-0.179557571	3.58E-11	-0.321003867	1.71E-33	0.035407963	0.195202685	-0.198684571	2.14E-13	0.092947397	0.00065769	-0.20250183	7.24E-14	-0.101489556	0.000198221
RPL22	ribosomal protein L22	6146	yellow	-0.082955738	0.002372987	-0.253552011	4.21E-21	0.324808479	2.70E-34	0.038525208	0.158698804	0.678023193	4.28E-181	0.490208468	6.24E-82	0.20443461	4.14E-14	0.099182989	0.00027661	0.210433499	7.07E-15	0.001892146	0.944830956	0.192626788	1.15E-12	0.191813017	1.43E-12	-0.002888044	0.915882813	-0.097464588	0.000352956	-0.10915654	6.23E-05	-0.154432875	1.33E-08	0.119728854	1.11E-05	-0.044255466	0.105383255	0.032874577	0.229127632
LOC100131699	hypothetical LOC100131699	100131699	yellow	-0.111227722	4.49E-05	-0.365336002	1.42E-43	0.324627934	2.95E-34	-0.091853101	0.000761683	0.552186173	8.35E-108	0.426707311	2.05E-60	0.075162746	0.00590997	-0.015817985	0.562906918	0.162770646	2.06E-09	-0.092660878	0.000683564	0.267247978	2.39E-23	0.022420366	0.412183439	-0.115001818	2.44E-05	-0.410644169	1.17E-55	0.112525624	3.65E-05	0.012809303	0.639442001	0.523047072	5.68E-95	0.232968482	5.66E-18	-0.066000519	0.015675004
LOC100288550	hypothetical protein LOC100288550	100288550	yellow	-0.174542885	1.25E-10	-0.398444373	3.23E-52	0.323046088	6.37E-34	0.04607607	0.091799174	0.801096196	1.52E-300	0.456409688	6.48E-70	0.242133554	2.49E-19	0.272497545	3.03E-24	0.255529024	2.03E-21	0.15229346	2.11E-08	0.531893947	9.78E-99	0.242275759	2.37E-19	-0.10646053	9.44E-05	-0.198760127	2.10E-13	-0.091298596	0.000820017	-0.211413761	5.27E-15	-0.0326574	0.232219841	-0.296104918	1.60E-28	0.010257808	0.707543803
CIB1	calcium and integrin binding 1 (calmyrin)	10519	yellow	-0.259823754	4.09E-22	-0.438896316	3.36E-64	0.322519394	8.23E-34	0.161927526	2.50E-09	0.734075633	3.74E-227	0.384499441	1.86E-48	0.266691467	2.97E-23	0.455593012	1.22E-69	0.245661492	7.21E-20	-0.061740624	0.023813486	0.41370096	1.52E-56	0.107936088	7.53E-05	-0.128324592	2.45E-06	-0.225111351	7.43E-17	0.032128846	0.239868836	-0.136545275	5.24E-07	0.018541236	0.497679412	-0.335821719	1.11E-36	-0.03984885	0.144861164
IPP	intracisternal A particle-promoted polypeptide	3652	yellow	-0.13328026	9.77E-07	-0.374517238	7.14E-46	0.321355157	1.44E-33	0.002730962	0.920442375	0.62765241	1.10E-147	0.53564718	2.29E-100	0.293643828	4.66E-28	0.280051629	1.44E-25	0.235710521	2.25E-18	0.19298258	1.04E-12	0.548577678	3.80E-106	0.107794214	7.69E-05	-0.1852019	8.35E-12	-0.235200261	2.68E-18	-0.097805189	0.000336413	-0.323258997	5.75E-34	-0.021843712	0.42431347	-0.229526262	1.77E-17	-0.003841998	0.888257456
RPL18AP3	ribosomal protein L18a pseudogene 3	390354	yellow	-0.134633747	7.56E-07	-0.39880669	2.56E-52	0.320485764	2.20E-33	0.05779892	0.034380369	0.852589204	0	0.44853555	2.64E-67	0.24492697	9.34E-20	0.265334128	5.01E-23	0.299790471	3.14E-29	0.11102747	4.64E-05	0.473345627	9.10E-76	0.347699877	2.28E-39	-0.073151058	0.007387351	-0.154160097	1.41E-08	-0.023077786	0.39860811	-0.158109617	5.92E-09	-0.020459173	0.454274344	-0.237284972	1.32E-18	0.045859904	0.09333454
WBP1	WW domain binding protein 1	23559	yellow	-0.20632442	2.39E-14	-0.471463199	4.22E-75	0.310787791	2.14E-31	0.203757176	5.04E-14	0.783080606	2.89E-278	0.426427358	2.49E-60	0.297259547	9.62E-29	0.456659382	5.34E-70	0.210112984	7.78E-15	0.138380343	3.67E-07	0.53276118	4.12E-99	0.101201559	0.000206721	-0.113196612	3.28E-05	-0.202185762	7.92E-14	-0.003850241	0.888019302	-0.217465322	8.30E-16	-0.092916765	0.000660413	-0.378219889	8.06E-47	-0.120252286	1.02E-05
AATF	apoptosis antagonizing transcription factor	26574	yellow	0.114578233	2.62E-05	-0.368716971	2.06E-44	0.309295309	4.27E-31	-0.166345616	8.99E-10	0.616876372	2.55E-141	0.661736788	1.40E-169	0.458063272	1.80E-70	0.25229202	6.67E-21	0.252795138	5.55E-21	0.403148096	1.58E-53	0.691592219	2.84E-191	0.13295912	1.04E-06	-0.317254925	1.03E-32	-0.261395207	2.26E-22	-0.134433012	7.86E-07	-0.376178105	2.69E-46	-0.113600051	3.07E-05	-0.28847914	4.27E-27	-0.004098118	0.880862157
SURF1	surfeit 1	6834	yellow	-0.215431037	1.55E-15	-0.449623469	1.16E-67	0.308576748	5.94E-31	0.12713636	3.03E-06	0.762850718	1.16E-255	0.37934402	4.13E-47	0.291604329	1.12E-27	0.39837679	3.37E-52	0.267503123	2.16E-23	-0.019012889	0.486805063	0.469124473	2.81E-74	0.100843841	0.000217755	-0.068864963	0.011685142	-0.217215175	8.97E-16	0.012959648	0.635515454	-0.157910344	6.19E-09	0.019186116	0.482843627	-0.323689491	4.66E-34	-0.03467976	0.204553603
RPL10	ribosomal protein L10	6134	yellow	-0.102930812	0.000160394	-0.459692068	5.04E-71	0.306111325	1.83E-30	-0.064678837	0.017889165	0.890992081	0	0.596452938	6.56E-130	0.408859652	3.79E-55	0.358583609	6.21E-42	0.291115206	1.39E-27	0.256633576	1.35E-21	0.612559134	7.73E-139	0.300109581	2.73E-29	-0.11449677	2.66E-05	-0.179155037	3.96E-11	-0.102626229	0.000167773	-0.263338376	1.08E-22	-0.07044318	0.009896005	-0.256152948	1.61E-21	0.013993833	0.608787218
TRAPPC6A	trafficking protein particle complex 6A	79090	yellow	-0.202240708	7.80E-14	-0.442781764	1.94E-65	0.305754819	2.16E-30	0.048079942	0.078511311	0.673493824	8.09E-178	0.413835979	1.39E-56	0.357032284	1.46E-41	0.255311459	2.20E-21	0.348587536	1.42E-39	0.05293837	0.052694926	0.5840747	2.20E-123	0.061684787	0.023940847	-0.112800542	3.50E-05	-0.286257169	1.09E-26	0.070335804	0.010009513	-0.099756663	0.000254775	0.036581781	0.180794986	-0.253803323	3.84E-21	0.013299246	0.62668393
GAS5	growth arrest-specific 5 (non-protein coding)	60674	yellow	-0.163588535	1.71E-09	-0.363425388	4.17E-43	0.305202963	2.77E-30	0.03142232	0.250367932	0.768836404	4.15E-262	0.452968858	9.14E-69	0.285185103	1.71E-26	0.144097922	1.17E-07	0.254903969	2.56E-21	0.039273234	0.150760874	0.411763713	5.54E-56	0.214101042	2.34E-15	-0.013810576	0.613486921	-0.179182973	3.93E-11	-0.001245493	0.963668935	-0.141660245	1.92E-07	0.122235675	7.22E-06	-0.090474908	0.000914347	-0.025209719	0.356469864
IFI27L2	interferon, alpha-inducible protein 27-like 2	83982	yellow	-0.14795821	5.30E-08	-0.390470708	4.81E-50	0.304832323	3.28E-30	-0.016334622	0.550222205	0.765717114	1.00E-258	0.449135714	1.68E-67	0.312347483	1.04E-31	0.468090081	6.46E-74	0.192834486	1.09E-12	0.051178235	0.061080804	0.446494988	1.22E-66	0.19593528	4.62E-13	-0.117519711	1.61E-05	-0.167941703	6.17E-10	-0.046310553	0.090156694	-0.211415409	5.27E-15	-0.079123657	0.003752595	-0.390548544	4.58E-50	-0.050204982	0.066173347
RPL29P2	ribosomal protein L29 pseudogene 2	118432	yellow	-0.260028392	3.79E-22	-0.463865448	1.89E-72	0.302686499	8.63E-30	0.080106032	0.003342555	0.731367554	1.16E-224	0.328650592	4.07E-35	0.163050946	1.93E-09	0.141965238	1.80E-07	0.220522011	3.20E-16	-0.174138257	1.38E-10	0.323913216	4.18E-34	0.181547777	2.15E-11	-0.051665401	0.058656115	-0.307285396	1.07E-30	0.307557257	9.48E-31	0.120913211	9.07E-06	0.410463406	1.31E-55	0.065108811	0.017140543	-0.082035417	0.002653597
POLR2F	polymerase (RNA) II (DNA directed) polypeptide F	5435	yellow	-0.054510789	0.046038114	-0.420851388	1.19E-58	0.300783045	2.02E-29	0.032404957	0.235851229	0.813077057	1.12486040189641e-316	0.620100883	3.37E-143	0.47826664	1.57E-77	0.385130512	1.27E-48	0.245667617	7.19E-20	0.172900971	1.87E-10	0.494174051	1.97E-83	0.249391619	1.91E-20	-0.188788295	3.24E-12	-0.158102012	5.93E-09	-0.055884888	0.040814234	-0.237889376	1.07E-18	-0.104512916	0.000126729	-0.404275248	7.61E-54	-0.023587306	0.388274171
LOC100289349	similar to hCG1643102	100289349	yellow	-0.124311224	5.02E-06	-0.486945247	1.04E-80	0.300088226	2.75E-29	-0.076612767	0.005016142	0.885046871	0	0.597891793	1.10E-130	0.412737784	2.89E-56	0.3449536	9.77E-39	0.295823309	1.80E-28	0.22661512	4.57E-17	0.603209457	1.36E-133	0.29462832	3.04E-28	-0.117595858	1.59E-05	-0.209341937	9.79E-15	-0.040488673	0.138512525	-0.218992259	5.16E-16	-0.022057264	0.41979724	-0.223233131	1.36E-16	0.007823863	0.7747728
RPL10L	ribosomal protein L10-like	140801	yellow	-0.126178396	3.60E-06	-0.438315725	5.13E-64	0.298903971	4.66E-29	-0.041843944	0.125774108	0.774429535	2.60E-268	0.504309786	2.34E-87	0.299945905	2.93E-29	0.256681248	1.33E-21	0.268230114	1.63E-23	0.180113631	3.11E-11	0.551536332	1.67E-107	0.214973282	1.79E-15	-0.119968683	1.07E-05	-0.250743968	1.17E-20	-0.017571325	0.520441216	-0.177394718	6.17E-11	0.03065497	0.262129353	-0.174204855	1.36E-10	0.009922161	0.716693993
PHACTR3	phosphatase and actin regulator 3	116154	yellow	-0.133851883	8.77E-07	-0.17442284	1.29E-10	0.297466261	8.78E-29	-0.036009116	0.187722289	0.512178998	1.69E-90	0.460234523	3.30E-71	0.340908359	8.10E-38	0.136818401	4.97E-07	0.145813117	8.26E-08	-0.002743439	0.920080097	0.298573888	5.39E-29	-0.018273983	0.503897976	-0.035695406	0.191599104	-0.144433776	1.10E-07	-0.152426795	2.05E-08	-0.193437283	9.20E-13	0.006361697	0.816024356	-0.231070922	1.06E-17	-0.080532793	0.003177476
RAB32	RAB32, member RAS oncogene family	10981	yellow	-0.179566923	3.57E-11	-0.404756302	5.57E-54	0.295359671	2.21E-28	0.084158362	0.002047201	0.682444758	2.38E-184	0.42602787	3.29E-60	0.302166213	1.09E-29	0.36168583	1.11E-42	0.347267533	2.87E-39	-0.011219786	0.681555657	0.376142229	2.75E-46	0.127285028	2.95E-06	-0.08271695	0.002443062	-0.209333077	9.82E-15	0.009988573	0.714880258	-0.051640603	0.058777582	0.070252634	0.010098227	-0.248677831	2.46E-20	0.104631716	0.00012449
ORMDL2	ORM1-like 2 (S. cerevisiae)	29095	yellow	-0.068346048	0.012333083	-0.448245884	3.29E-67	0.293798603	4.36E-28	-0.188014966	3.98E-12	0.70025645	4.50E-198	0.664787768	1.11E-171	0.526849372	1.41E-96	0.286581074	9.52E-27	0.225727785	6.09E-17	0.094012562	0.000569272	0.418665548	5.30E-58	0.215107189	1.72E-15	-0.18806975	3.92E-12	-0.206527106	2.25E-14	-0.013838011	0.612782332	-0.168117165	5.92E-10	0.024902033	0.362371973	-0.223620706	1.20E-16	-0.034195707	0.210946865
RPS15	ribosomal protein S15	6209	yellow	-0.100550257	0.000227221	-0.312390262	1.02E-31	0.286600452	9.45E-27	-0.02959256	0.279034113	0.852357014	0	0.472473725	1.85E-75	0.308727013	5.54E-31	0.243532198	1.53E-19	0.240577202	4.27E-19	0.12115888	8.69E-06	0.40332489	1.41E-53	0.430262693	1.67E-61	-0.022461476	0.4113266	-0.033809072	0.216156205	-0.057604255	0.034992517	-0.196134638	4.37E-13	-0.104104122	0.000134725	-0.244373168	1.14E-19	0.055756077	0.041281618
LOC729973	hypothetical LOC729973	729973	yellow	-0.046799133	0.086810253	-0.293155132	5.76E-28	0.286390979	1.03E-26	0.172351449	2.14E-10	0.657624799	8.68E-167	0.476273247	8.19E-77	0.159611293	4.23E-09	0.356816131	1.65E-41	0.097491776	0.000351608	0.000824289	0.975950801	0.126172908	3.61E-06	0.096765701	0.000389308	-0.05583012	0.041012408	-0.135902187	5.93E-07	-0.157355558	7.00E-09	-0.220810712	2.92E-16	0.048295445	0.077180511	-0.179427443	3.70E-11	-0.063998601	0.019131986
FGGY	FGGY carbohydrate kinase domain containing	55277	yellow	-0.153844298	1.51E-08	-0.371356568	4.50E-45	0.282689843	4.84E-26	0.141619276	1.93E-07	0.61578381	1.09E-140	0.385570024	9.73E-49	0.075298726	0.005820437	0.383863701	2.74E-48	0.153393782	1.67E-08	0.05172408	0.058369527	0.287109454	7.62E-27	0.203318435	5.72E-14	-0.175130763	1.08E-10	-0.181302313	2.29E-11	-0.182094661	1.87E-11	-0.26298905	1.23E-22	-0.005006302	0.854726721	-0.245333055	8.10E-20	-0.005329699	0.845456889
TAF10	TAF10 RNA polymerase II, TATA box binding protein (TBP)-associated factor, 30kDa	6881	yellow	-0.248230142	2.89E-20	-0.343237655	2.40E-38	0.282015757	6.40E-26	0.252526629	6.12E-21	0.670790465	6.85E-176	0.198268789	2.41E-13	0.211673843	4.87E-15	0.355576217	3.25E-41	0.214596848	2.01E-15	-0.176457783	7.80E-11	0.272476094	3.06E-24	0.111844275	4.07E-05	0.015751574	0.564547646	-0.109674868	5.74E-05	0.088004935	0.001260776	-0.030546637	0.263820031	-0.017923942	0.512104462	-0.338484819	2.83E-37	-0.083918161	0.002108794
LOC100291837	similar to ribosomal protein S21	100291837	yellow	-0.084020612	0.002082318	-0.166481799	8.71E-10	0.275565172	8.90E-25	0.035965908	0.188252783	0.747066898	1.52E-239	0.349794984	7.45E-40	0.153102996	1.78E-08	0.159806887	4.05E-09	0.183487824	1.31E-11	-0.060220993	0.027496656	0.149427633	3.89E-08	0.373377941	1.39E-45	0.104373321	0.000129408	0.032242868	0.238203928	-0.060301242	0.027290542	-0.076990873	0.004804089	0.034252087	0.210194864	-0.132618033	1.11E-06	0.036797159	0.178239301
SERF2	small EDRK-rich factor 2	10169	yellow	-0.094856792	0.000507189	-0.426763294	1.97E-60	0.275310013	9.86E-25	-0.047699169	0.080908257	0.804579613	4.05E-305	0.465271517	6.17E-73	0.433087207	2.24E-62	0.422700254	3.32E-59	0.225987721	5.60E-17	-0.019759182	0.469863985	0.419493207	3.01E-58	0.203037066	6.20E-14	-0.0447154	0.101809615	-0.154738724	1.25E-08	0.078601871	0.003988486	-0.035761045	0.190783113	0.098419539	0.000308391	-0.245082188	8.85E-20	-0.100195349	0.000239179
LOC648771	similar to 60S ribosomal protein L12	648771	yellow	-0.278506642	2.70E-25	-0.446807524	9.69E-67	0.27384548	1.77E-24	0.024003287	0.379959414	0.834817469	0	0.481278267	1.27E-78	0.256462445	1.44E-21	0.220393464	3.33E-16	0.210633593	6.66E-15	0.016641341	0.542758617	0.327339046	7.79E-35	0.34179432	5.11E-38	-0.016333579	0.550247671	-0.143291776	1.38E-07	0.006426521	0.814183748	-0.074477101	0.006380583	0.158395923	5.55E-09	-0.023232531	0.395452245	-0.018867239	0.490149407
STX4	syntaxin 4	6810	yellow	0.055313282	0.042922954	-0.214608028	2.00E-15	0.271484711	4.53E-24	-0.144073789	1.18E-07	0.61448485	6.11E-140	0.555626596	2.10E-109	0.548167812	5.85E-106	0.212616819	3.66E-15	0.269722921	9.08E-24	0.227277612	3.69E-17	0.467046642	1.49E-73	0.186694532	5.64E-12	-0.114085271	2.84E-05	-0.069745325	0.010654655	-0.059330947	0.029874093	-0.19990202	1.52E-13	-0.225709779	6.13E-17	-0.447103522	7.76E-67	0.080709745	0.003111232
GMNN	geminin, DNA replication inhibitor	51053	yellow	0.073714224	0.006943569	-0.413381076	1.88E-56	0.27100308	5.49E-24	-0.023824366	0.383522266	0.586543701	1.16E-124	0.589184567	4.82E-126	0.227372744	3.58E-17	0.383915645	2.66E-48	0.182134285	1.85E-11	0.197130492	3.31E-13	0.362173057	8.42E-43	0.142504203	1.62E-07	-0.273311004	2.19E-24	-0.28867128	3.93E-27	-0.161531777	2.74E-09	-0.251045567	1.05E-20	0.07751312	0.004524519	-0.141302595	2.06E-07	-0.02733307	0.317403591
MSRB2	methionine sulfoxide reductase B2	22921	yellow	-0.046176639	0.091091799	-0.411467674	6.74E-56	0.26734088	2.30E-23	0.170086245	3.70E-10	0.752351116	8.34E-245	0.398637568	2.85E-52	0.286623079	9.36E-27	0.493295411	4.26E-83	0.115488912	2.26E-05	0.040770217	0.135787672	0.360986064	1.64E-42	0.175956097	8.83E-11	-0.139684542	2.84E-07	-0.137382825	4.46E-07	-0.015090135	0.581013066	-0.210870753	6.20E-15	-0.045469938	0.096156359	-0.35128011	3.35E-40	-0.165823834	1.02E-09
BRI3	brain protein I3	25798	yellow	-0.136457956	5.33E-07	-0.458649538	1.14E-70	0.265944232	3.96E-23	0.235247759	2.63E-18	0.73152645	8.29E-225	0.401485342	4.61E-53	0.276074779	7.24E-25	0.505371781	8.92E-88	0.202125214	8.06E-14	-0.005363198	0.844497874	0.290874841	1.54E-27	0.174034176	1.42E-10	-0.106794551	8.97E-05	-0.15711037	7.39E-09	0.069881418	0.010502774	-0.06857629	0.012041768	-0.040431933	0.13906672	-0.371555692	4.01E-45	-0.101063091	0.000210928
LOC644563	general transcription factor IIIC, polypeptide 6, alpha 35kDa pseudogene	644563	yellow	-0.351060937	3.78E-40	-0.53456171	6.81E-100	0.264298752	7.47E-23	0.181391904	2.24E-11	0.661989971	9.37E-170	0.488784812	2.13E-81	0.216733973	1.04E-15	0.386257755	6.40E-49	0.152788221	1.90E-08	-0.103812216	0.000140723	0.248461252	2.66E-20	0.073750143	0.006916093	-0.148871412	4.37E-08	-0.269360647	1.05E-23	-0.150424616	3.15E-08	-0.247214723	4.15E-20	0.136032397	5.79E-07	-0.133419056	9.52E-07	-0.085750522	0.001678878
AKR7A2	aldo-keto reductase family 7, member A2 (aflatoxin aldehyde reductase)	8574	yellow	-0.258442088	6.88E-22	-0.512952182	8.24E-91	0.260196672	3.56E-22	0.12504142	4.41E-06	0.721318832	1.12E-215	0.503575763	4.55E-87	0.311632388	1.45E-31	0.524821039	1.02E-95	0.107564351	7.97E-05	0.035999737	0.187837347	0.360916016	1.70E-42	0.127420734	2.88E-06	-0.170301469	3.52E-10	-0.22158375	2.29E-16	-0.039831074	0.145040674	-0.254338637	3.15E-21	0.002311012	0.932644504	-0.276072827	7.25E-25	-0.145927403	8.07E-08
RCBTB2	regulator of chromosome condensation (RCC1) and BTB (POZ) domain containing protein 2	1102	yellow	-0.157772298	6.38E-09	-0.407453872	9.56E-55	0.260014873	3.81E-22	-0.020491446	0.45356268	0.613122929	3.68E-139	0.616002781	8.16E-141	0.390518243	4.67E-50	0.342195019	4.15E-38	0.191460586	1.58E-12	0.117023645	1.75E-05	0.367932088	3.23E-44	0.116120443	2.03E-05	-0.219056497	5.06E-16	-0.226158236	5.30E-17	-0.101937967	0.000185637	-0.273709962	1.87E-24	-0.030539645	0.263929413	-0.235910856	2.11E-18	0.008292148	0.761688377
C17orf89	chromosome 17 open reading frame 89	284184	yellow	-0.282310331	5.67E-26	-0.406578832	1.70E-54	0.259764361	4.19E-22	0.383520788	3.37E-48	0.722150621	2.09E-216	0.275670717	8.53E-25	0.150745807	2.94E-08	0.345681768	6.65E-39	0.159146798	4.69E-09	-0.259384694	4.83E-22	0.052717963	0.053689285	0.16719272	7.37E-10	0.066091953	0.015531144	-0.093537415	0.000607251	0.100428862	0.000231246	0.025939007	0.342723842	0.194009193	7.87E-13	-0.091668537	0.000780657	-0.116781483	1.82E-05
RAB3IP	RAB3A interacting protein (rabin3)	117177	yellow	0.015696773	0.565903275	-0.272537863	2.99E-24	0.256228939	1.57E-21	-0.184863494	9.13E-12	0.576306892	1.98E-119	0.552610039	5.31E-108	0.406489283	1.80E-54	0.09449809	0.000532754	0.281292303	8.63E-26	0.202633589	6.97E-14	0.418613207	5.49E-58	0.165629396	1.06E-09	-0.076027014	0.005361377	-0.108140709	7.29E-05	-0.199883543	1.53E-13	-0.231435448	9.42E-18	-0.009824685	0.719359043	-0.111251134	4.48E-05	0.099230363	0.000274742
ENOX2	ecto-NOX disulfide-thiol exchanger 2	10495	yellow	-0.352156163	2.09E-40	-0.43410078	1.08E-62	0.255733255	1.88E-21	0.243728793	1.42E-19	0.565975552	2.47E-114	0.456830286	4.68E-70	0.318305772	6.24E-33	0.148445783	4.78E-08	0.206046432	2.59E-14	-0.030102053	0.270836926	0.317865027	7.70E-33	0.140404709	2.46E-07	-0.142365361	1.67E-07	-0.163130932	1.90E-09	-0.032760246	0.230751829	-0.189311611	2.81E-12	0.025616284	0.348764415	-0.206801624	2.07E-14	0.008058099	0.768219724
RPL26	ribosomal protein L26	6154	yellow	-0.17882332	4.31E-11	-0.326224456	1.35E-34	0.255613671	1.97E-21	-0.005776089	0.832696874	0.813121338	9.75743287304928e-317	0.421216291	9.24E-59	0.243109701	1.77E-19	0.181877125	1.98E-11	0.214425434	2.12E-15	-0.073590433	0.007039013	0.198881514	2.03E-13	0.362235132	8.13E-43	0.104342838	0.00013	-0.050845778	0.06278264	0.001748822	0.949003909	-0.051834753	0.057832161	0.138055345	3.91E-07	-0.040818409	0.135325431	0.030129548	0.270399303
FAM200B	family with sequence similarity 200, member B	285550	yellow	-0.190355318	2.13E-12	-0.268048377	1.75E-23	0.255604495	1.98E-21	0.107290015	8.31E-05	0.603051084	1.66E-133	0.31514018	2.80E-32	0.203691935	5.13E-14	0.140893413	2.24E-07	0.323562121	4.96E-34	-0.008338323	0.760401801	0.322355278	8.91E-34	0.242238629	2.40E-19	-0.003817281	0.88897167	-0.048986538	0.073036187	-0.148821011	4.42E-08	-0.139924282	2.71E-07	-0.034510498	0.206772974	-0.227005814	4.03E-17	0.165499126	1.10E-09
LSM7	LSM7 homolog, U6 small nuclear RNA associated (S. cerevisiae)	51690	yellow	-0.237443838	1.25E-18	-0.444806684	4.32E-66	0.253530389	4.24E-21	0.227797451	3.11E-17	0.644112738	6.54E-158	0.350303018	5.67E-40	0.113134444	3.31E-05	0.23963829	5.90E-19	0.134917439	7.16E-07	-0.082716394	0.002443227	0.145931608	8.06E-08	0.217520457	8.16E-16	-0.071113176	0.009213265	-0.157530771	6.73E-09	0.08613665	0.001599249	-0.054389465	0.046525234	0.080990786	0.003008602	-0.115411078	2.29E-05	-0.046052485	0.091965697
ALOX5	arachidonate 5-lipoxygenase	240	yellow	-0.134348288	7.98E-07	-0.337710322	4.22E-37	0.253272197	4.66E-21	-0.019915296	0.466361762	0.610125953	1.86E-137	0.424788421	7.81E-60	0.197032166	3.41E-13	0.081705083	0.002761491	0.395894324	1.62E-51	0.155104514	1.15E-08	0.372029936	3.04E-45	0.24111394	3.54E-19	-0.004592486	0.866617438	-0.13411674	8.34E-07	-0.022999318	0.400214147	-0.059879253	0.028389481	0.150031846	3.42E-08	0.037994659	0.164517698	0.219058748	5.06E-16
P2RY12	purinergic receptor P2Y, G-protein coupled, 12	64805	yellow	-0.16584597	1.01E-09	-0.225188452	7.25E-17	0.250054359	1.50E-20	0.167402844	7.01E-10	0.65781144	6.50E-167	0.227825509	3.09E-17	0.198031355	2.58E-13	0.197597494	2.91E-13	0.262464581	1.51E-22	-0.239720658	5.73E-19	0.068232428	0.012479126	0.266685208	2.97E-23	0.127666105	2.76E-06	0.016978015	0.534624539	0.077123087	0.004731873	0.054667275	0.045416153	0.147330632	6.04E-08	-0.071672104	0.008676174	0.029978605	0.272807782
BRMS1	breast cancer metastasis suppressor 1	25855	yellow	-0.195108272	5.81E-13	-0.361984116	9.36E-43	0.249685921	1.71E-20	0.161586006	2.70E-09	0.576104878	2.50E-119	0.385501373	1.01E-48	0.337175971	5.54E-37	0.23269502	6.20E-18	0.178778637	4.36E-11	0.117991543	1.49E-05	0.471244798	5.04E-75	0.118995611	1.26E-05	-0.128836338	2.23E-06	-0.113016806	3.38E-05	0.043129729	0.114549936	-0.160981655	3.10E-09	-0.055386491	0.042647843	-0.297326659	9.34E-29	-0.117485154	1.62E-05
HSD17B10	hydroxysteroid (17-beta) dehydrogenase 10	3028	yellow	-0.171687408	2.52E-10	-0.527184197	1.02E-96	0.249445777	1.87E-20	-0.05311298	0.051918133	0.726724834	1.84E-220	0.519601021	1.55E-93	0.432531498	3.33E-62	0.420423376	1.59E-58	0.293084352	5.94E-28	0.145662167	8.52E-08	0.591320909	3.61E-127	0.139492076	2.95E-07	-0.165739312	1.04E-09	-0.23546133	2.45E-18	-0.073437495	0.007158555	-0.218286726	6.43E-16	-0.072861236	0.007625498	-0.350477195	5.17E-40	-0.002816156	0.91796912
C1orf123	chromosome 1 open reading frame 123	54987	yellow	-0.143362048	1.36E-07	-0.363785505	3.40E-43	0.249406801	1.89E-20	0.099821886	0.000252397	0.625024478	4.13E-146	0.473980934	5.41E-76	0.263125147	1.17E-22	0.195591103	5.09E-13	0.253811865	3.82E-21	0.175089343	1.09E-10	0.406363207	1.95E-54	0.188008931	3.98E-12	-0.137143837	4.67E-07	-0.138701803	3.45E-07	-0.10595489	0.000101948	-0.210640184	6.64E-15	-0.086529572	0.001521797	-0.22844844	2.52E-17	0.080770392	0.003088819
CX3CR1	chemokine (C-X3-C motif) receptor 1	1524	yellow	-0.128846804	2.22E-06	-0.317126852	1.09E-32	0.248916397	2.26E-20	0.106504858	9.38E-05	0.736411639	2.50E-229	0.365251015	1.49E-43	0.28788378	5.49E-27	0.293743719	4.46E-28	0.266828148	2.81E-23	-0.135059021	6.97E-07	0.127091139	3.06E-06	0.249924743	1.57E-20	0.091368712	0.000812418	-0.031304106	0.252155448	0.019925991	0.466122379	-0.015691267	0.566039544	0.118422844	1.38E-05	-0.102003462	0.000183863	0.022419882	0.412193538
GTF3C6	general transcription factor IIIC, polypeptide 6, alpha 35kDa	112495	yellow	-0.345818189	6.19E-39	-0.531207918	1.93E-98	0.247411451	3.87E-20	0.250315458	1.37E-20	0.733491474	1.30E-226	0.544366329	3.09E-104	0.265529352	4.65E-23	0.500553289	6.91E-86	0.110825595	4.79E-05	-0.039503189	0.148382405	0.216548255	1.10E-15	0.164768237	1.30E-09	-0.131851919	1.28E-06	-0.186032598	6.72E-12	-0.140424469	2.45E-07	-0.241314917	3.30E-19	0.040113719	0.142206508	-0.2404965	4.39E-19	-0.089959471	0.000978383
RPL13AP5	ribosomal protein L13a pseudogene 5	728658	yellow	-0.207444145	1.72E-14	-0.509548148	1.94E-89	0.24610649	6.16E-20	-0.030919003	0.258040158	0.832961558	0	0.482271145	5.49E-79	0.325657344	1.78E-34	0.272263483	3.33E-24	0.286919476	8.26E-27	0.152578407	1.99E-08	0.560956632	6.38E-112	0.297535266	8.52E-29	-0.0759554	0.005405023	-0.199687281	1.61E-13	-0.001107825	0.967682382	-0.139007542	3.25E-07	0.065421832	0.016612955	-0.100613978	0.000225134	-0.004950291	0.85633428
RPL28	ribosomal protein L28	6158	yellow	-0.218805517	5.47E-16	-0.44505975	3.57E-66	0.245033402	9.00E-20	0.055741176	0.041335976	0.847148144	0	0.465306849	6.00E-73	0.392304063	1.54E-50	0.33065835	1.50E-35	0.221256765	2.54E-16	0.042472279	0.12018657	0.409335133	2.77E-55	0.298929064	4.60E-29	-0.015452898	0.571954896	-0.10921189	6.17E-05	0.030131626	0.270366245	-0.148866491	4.38E-08	-0.014389227	0.598702092	-0.209724304	8.74E-15	-0.029929	0.273602468
AGBL5	ATP/GTP binding protein-like 5	60509	yellow	-0.311894224	1.28E-31	-0.464632142	1.03E-72	0.244051767	1.27E-19	0.204195026	4.44E-14	0.811932788	4.37978735668543e-315	0.387867043	2.39E-49	0.277843589	3.54E-25	0.463927531	1.80E-72	0.112539621	3.64E-05	-0.166758703	8.16E-10	0.142503714	1.62E-07	0.295198185	2.37E-28	-0.012091877	0.658316653	-0.080262155	0.00328128	0.02282748	0.403744767	-0.082722611	0.002441379	0.034497669	0.206941892	-0.236232152	1.89E-18	-0.103597626	0.000145291
RGN	regucalcin (senescence marker protein-30)	9104	yellow	-0.04692327	0.085976152	-0.375784973	3.39E-46	0.241587205	3.01E-19	-0.142804023	1.52E-07	0.530069137	5.97E-98	0.51606247	4.45E-92	0.291739331	1.06E-27	0.297535288	8.52E-29	0.237926375	1.06E-18	0.181896978	1.97E-11	0.486330177	1.75E-80	0.099894648	0.000249769	-0.198687995	2.14E-13	-0.24081492	3.93E-19	-0.155677623	1.01E-08	-0.265523296	4.66E-23	0.050307444	0.065621269	-0.1337149	9.00E-07	0.042413618	0.120699857
RPL13AP6	ribosomal protein L13a pseudogene 6	644511	yellow	-0.201270641	1.03E-13	-0.500874254	5.19E-86	0.240180644	4.89E-19	-0.026357623	0.334988528	0.846919963	0	0.498872141	3.10E-85	0.34846191	1.52E-39	0.308524884	6.08E-31	0.290123704	2.12E-27	0.182124584	1.86E-11	0.572760291	1.17E-117	0.323384848	5.41E-34	-0.086572611	0.001513527	-0.171541123	2.61E-10	-0.059367258	0.029773755	-0.196323988	4.15E-13	-0.024951994	0.361409476	-0.168777526	5.06E-10	0.00928371	0.734210678
COMMD6	COMM domain containing 6	170622	yellow	-0.163256482	1.84E-09	-0.407754937	7.85E-55	0.238795531	7.88E-19	-0.010528549	0.700193591	0.756752962	2.73E-249	0.586436128	1.32E-124	0.330318459	1.78E-35	0.292371148	8.08E-28	0.157144844	7.34E-09	-0.045611909	0.095121251	0.101034534	0.000211806	0.316926156	1.20E-32	0.003713024	0.891985237	-0.057225126	0.036211447	-0.091740193	0.000773239	-0.144293783	1.13E-07	0.111927894	4.02E-05	-0.0413975	0.129865528	0.014819768	0.587807438
BRD7	bromodomain containing 7	29117	yellow	-0.238840598	7.76E-19	-0.486901902	1.07E-80	0.238378104	9.09E-19	-0.008366065	0.759629154	0.787526726	1.46E-283	0.643509155	1.59E-157	0.488453143	2.84E-81	0.413483764	1.76E-56	0.197492853	2.99E-13	0.148085725	5.16E-08	0.408155211	6.03E-55	0.284627517	2.16E-26	-0.1382097	3.79E-07	-0.11589973	2.11E-05	-0.213949492	2.45E-15	-0.266729497	2.92E-23	-0.174213195	1.36E-10	-0.382671158	5.63E-48	0.002941948	0.914318795
RPL15	ribosomal protein L15	6138	yellow	-0.159578505	4.26E-09	-0.442364689	2.64E-65	0.237448809	1.25E-18	-0.002751995	0.919831676	0.838180572	0	0.542910736	1.39E-103	0.364897526	1.81E-43	0.341686828	5.40E-38	0.171469961	2.65E-10	0.066857578	0.014371372	0.283547911	3.39E-26	0.290408936	1.88E-27	0.006150017	0.822041805	-0.111591943	4.24E-05	0.018456734	0.499641218	-0.092268499	0.000720531	0.06437033	0.018443786	-0.143662872	1.28E-07	-0.042022721	0.12416412
SLC27A5	solute carrier family 27 (fatty acid transporter), member 5	10998	yellow	-0.201407981	9.90E-14	-0.272485648	3.05E-24	0.236430364	1.77E-18	0.302661669	8.72E-30	0.693805504	5.48E-193	0.138397843	3.66E-07	0.105945338	0.000102096	0.403915299	9.61E-54	0.135796262	6.06E-07	-0.200873105	1.15E-13	0.091890715	0.000757869	0.209601593	9.06E-15	0.10991846	5.53E-05	-0.004289292	0.875348836	0.07326152	0.007298353	0.020143709	0.461263795	-0.004931766	0.856866104	-0.274990007	1.12E-24	-0.072611366	0.007836311
C9orf156	chromosome 9 open reading frame 156	51531	yellow	-0.087297961	0.001380219	-0.368241731	2.70E-44	0.234641409	3.23E-18	-0.010482765	0.701434594	0.554087967	1.09E-108	0.477638077	2.64E-77	0.306288645	1.69E-30	0.243076686	1.79E-19	0.30432612	4.12E-30	0.291343671	1.26E-27	0.584617261	1.15E-123	0.154223908	1.39E-08	-0.217578963	8.02E-16	-0.18390786	1.17E-11	-0.131915037	1.26E-06	-0.305650457	2.26E-30	-0.131078255	1.48E-06	-0.25391657	3.68E-21	0.121750557	7.85E-06
HSD17B8	hydroxysteroid (17-beta) dehydrogenase 8	7923	yellow	-0.099742896	0.000255279	-0.383884054	2.71E-48	0.231309976	9.82E-18	0.034917075	0.201471124	0.632488389	1.26E-150	0.32259841	7.92E-34	0.272445016	3.10E-24	0.455438076	1.37E-69	0.308614215	5.84E-31	0.092597514	0.000689412	0.499790519	1.37E-85	0.053190061	0.051578279	-0.079675918	0.003516788	-0.208553306	1.24E-14	0.016210519	0.553256389	-0.116716829	1.84E-05	-0.053785843	0.04901368	-0.320646401	2.03E-33	0.058907146	0.031066822
RPL18	ribosomal protein L18	6141	yellow	-0.174718644	1.20E-10	-0.454917412	2.05E-69	0.230964147	1.10E-17	-0.010179356	0.709678808	0.81844221	0	0.492061508	1.25E-82	0.314969836	3.03E-32	0.333208777	4.16E-36	0.260251398	3.48E-22	0.255306222	2.21E-21	0.573721641	3.88E-118	0.308493042	6.17E-31	-0.066981662	0.014190774	-0.135367835	6.57E-07	-0.064223679	0.01871266	-0.218722193	5.62E-16	-0.050087022	0.066813655	-0.186943226	5.28E-12	0.01039449	0.70382962
IPO13	importin 13	9670	yellow	-0.17354937	1.60E-10	-0.443646728	1.02E-65	0.229744444	1.65E-17	-0.007231713	0.791409639	0.563769275	2.87E-113	0.512746858	9.98E-91	0.522987877	6.02E-95	0.195407179	5.35E-13	0.364181317	2.72E-43	0.213149052	3.12E-15	0.634889237	4.18E-152	0.01807981	0.508441665	-0.177460194	6.07E-11	-0.253011934	5.13E-21	-0.058765711	0.031473851	-0.182078178	1.88E-11	-0.081069188	0.002980527	-0.298530799	5.49E-29	0.0891857	0.001082337
C9orf142	chromosome 9 open reading frame 142	286257	yellow	-0.05460409	0.045666427	-0.264860147	6.02E-23	0.228930552	2.15E-17	-0.047423532	0.082680139	0.612199991	1.24E-138	0.414422778	9.35E-57	0.326447276	1.21E-34	0.257196249	1.09E-21	0.270278747	7.30E-24	0.396284079	1.27E-51	0.645800218	5.39E-159	0.184735883	9.43E-12	-0.113374098	3.19E-05	-0.085320508	0.001771833	-0.065044751	0.017250309	-0.244972845	9.19E-20	-0.252306178	6.63E-21	-0.37490642	5.68E-46	0.062280308	0.022612465
ILVBL	ilvB (bacterial acetolactate synthase)-like	10994	yellow	-0.03382443	0.215947534	-0.434601529	7.54E-63	0.228220122	2.71E-17	-0.079836909	0.003450629	0.67190822	1.10E-176	0.538466975	1.32E-101	0.514712145	1.59E-91	0.362326902	7.72E-43	0.221364255	2.45E-16	0.206421705	2.32E-14	0.539266709	5.85E-102	0.203447244	5.51E-14	-0.234822337	3.04E-18	-0.187696933	4.33E-12	0.046665604	0.087714735	-0.113049201	3.36E-05	-0.067177511	0.013909795	-0.326646434	1.10E-34	-0.080053419	0.003363438
TMEM219	transmembrane protein 219	124446	yellow	-0.240990129	3.70E-19	-0.465212848	6.46E-73	0.226628375	4.55E-17	0.14408888	1.18E-07	0.743160255	9.68E-236	0.367130336	5.10E-44	0.351253375	3.40E-40	0.486169587	2.01E-80	0.205590636	2.96E-14	0.017797563	0.515084355	0.427418964	1.24E-60	0.151187437	2.68E-08	-0.064901978	0.017497161	-0.15636652	8.71E-09	0.042907366	0.116432636	-0.124196265	5.12E-06	-0.122014731	7.50E-06	-0.380058776	2.70E-47	-0.078734612	0.003927234
SLC25A1	solute carrier family 25 (mitochondrial carrier; citrate transporter), member 1	6576	yellow	-0.148642252	4.59E-08	-0.418076373	7.91E-58	0.225795301	5.96E-17	-0.017752633	0.516145932	0.592864253	5.47E-128	0.445783674	2.08E-66	0.422181082	4.76E-59	0.39114173	3.17E-50	0.212024615	4.38E-15	0.183060929	1.46E-11	0.586373134	1.42E-124	0.096602717	0.000398274	-0.198729776	2.12E-13	-0.18435758	1.04E-11	-0.022869507	0.402879569	-0.244444391	1.11E-19	-0.103776311	0.000141478	-0.33429759	2.40E-36	-0.076978469	0.004810915
UBA52	ubiquitin A-52 residue ribosomal protein fusion product 1	7311	yellow	-0.290597397	1.73E-27	-0.387438437	3.11E-49	0.225436141	6.69E-17	0.141983476	1.80E-07	0.847667069	0	0.342204659	4.12E-38	0.314783812	3.31E-32	0.315162219	2.77E-32	0.18957457	2.62E-12	-0.183815011	1.20E-11	0.148403961	4.82E-08	0.456750667	4.98E-70	0.065435939	0.016589517	0.034733373	0.203854244	0.039202424	0.151499095	-0.027041984	0.322586721	-0.041379174	0.130035652	-0.256108818	1.64E-21	3.42E-05	0.999001165
LOC730144	similar to eukaryotic translation initiation factor 1	730144	yellow	-0.222365398	1.79E-16	-0.302477498	9.47E-30	0.2249458	7.83E-17	0.109503628	5.90E-05	0.697275032	1.05E-195	0.305685004	2.23E-30	0.262088571	1.74E-22	0.210156316	7.68E-15	0.159721985	4.12E-09	-0.156124432	9.19E-09	0.139829381	2.76E-07	0.344289052	1.39E-38	0.105111875	0.000115816	0.013119503	0.631351748	0.087693135	0.001312228	-0.031454749	0.249879133	0.04535096	0.097030735	-0.133744158	8.95E-07	-0.022131895	0.418225606
RPL24	ribosomal protein L24	6152	yellow	-0.124147247	5.17E-06	-0.370575247	7.07E-45	0.224589859	8.78E-17	0.064342406	0.01849472	0.763114075	6.08E-256	0.470173639	1.20E-74	0.224344065	9.50E-17	0.257769582	8.84E-22	0.145708345	8.44E-08	0.093544731	0.000606649	0.239820251	5.54E-19	0.346442264	4.45E-39	0.001442726	0.957920584	-0.06168824	0.023932954	-0.04393673	0.107917606	-0.155247245	1.11E-08	0.042482204	0.120099891	-0.074273054	0.006526998	-0.028180828	0.302620694
NACA2	nascent polypeptide-associated complex alpha subunit 2	342538	yellow	-0.084591508	0.001940282	-0.288580685	4.09E-27	0.223987238	1.07E-16	-0.089050226	0.001101555	0.554591378	6.38E-109	0.425561849	4.56E-60	0.137670008	4.22E-07	0.033861274	0.21544751	0.087948902	0.001269883	-0.009815132	0.719620407	0.162676452	2.11E-09	0.214571672	2.02E-15	-0.017591251	0.519968242	-0.150276058	3.25E-08	0.016694437	0.541471728	-0.025197054	0.356711615	0.27086182	5.80E-24	0.113396397	3.17E-05	-0.021795457	0.42533788
DCXR	dicarbonyl/L-xylulose reductase	51181	yellow	0.260143476	3.63E-22	-0.17219313	2.23E-10	0.222562476	1.68E-16	-0.161325813	2.87E-09	0.539349803	5.37E-102	0.357295644	1.27E-41	0.292972887	6.23E-28	0.304192291	4.38E-30	0.193722278	8.51E-13	0.279874025	1.55E-25	0.48864969	2.40E-81	0.184611251	9.75E-12	-0.127908271	2.64E-06	-0.082185507	0.002605859	-0.024271637	0.374654048	-0.162706593	2.09E-09	-0.101431973	0.000199894	-0.262614677	1.42E-22	-0.028718022	0.293493904
RPS7	ribosomal protein S7	6201	yellow	-0.039390098	0.149548525	-0.228138949	2.79E-17	0.220368351	3.36E-16	-0.001443821	0.957888683	0.716901802	7.47E-212	0.38934851	9.62E-50	0.223135623	1.40E-16	0.274076526	1.62E-24	0.207482751	1.70E-14	0.170551868	3.31E-10	0.348350239	1.61E-39	0.349555192	8.48E-40	0.032080199	0.240581639	0.020493622	0.453514716	-0.184243747	1.07E-11	-0.261007322	2.62E-22	-0.146170127	7.68E-08	-0.244416706	1.12E-19	0.050204596	0.066175434
KIAA0114	KIAA0114	57291	yellow	-0.101729012	0.000191405	-0.326466244	1.20E-34	0.219062202	5.05E-16	0.115313381	2.32E-05	0.504387278	2.18E-87	0.321897383	1.11E-33	0.102881935	0.000161557	0.215048242	1.75E-15	0.301778811	1.30E-29	0.279640387	1.70E-25	0.549199173	1.98E-106	0.112712005	3.55E-05	-0.156366645	8.71E-09	-0.213664533	2.67E-15	-0.158996857	4.85E-09	-0.228649144	2.36E-17	-0.15240974	2.06E-08	-0.267752562	1.96E-23	0.089187771	0.001082046
CHCHD5	coiled-coil-helix-coiled-coil-helix domain containing 5	84269	yellow	-0.221239313	2.55E-16	-0.368312622	2.60E-44	0.217850807	7.37E-16	0.177281892	6.35E-11	0.601870452	7.42E-133	0.146842087	6.68E-08	0.187672728	4.35E-12	0.308791161	5.38E-31	0.370181457	8.87E-45	-0.151699163	2.40E-08	0.311677442	1.42E-31	0.098746843	0.000294369	0.059910003	0.028308135	-0.145374164	9.04E-08	0.190838436	1.87E-12	0.124450349	4.90E-06	0.009849388	0.718683316	-0.25911406	5.34E-22	0.126916615	3.16E-06
RNASET2	ribonuclease T2	8635	yellow	-0.305605476	2.31E-30	-0.431748132	5.82E-62	0.217831571	7.41E-16	0.354226933	6.79E-41	0.665676536	2.67E-172	0.267027797	2.60E-23	0.155610055	1.03E-08	0.279725595	1.64E-25	0.226609936	4.58E-17	-0.08732275	0.00137586	0.231217562	1.01E-17	0.188005211	3.99E-12	-0.010533512	0.70005909	-0.095952468	0.000435998	-0.008401329	0.75864734	-0.102797778	0.000163578	0.045967908	0.092564862	-0.181737396	2.05E-11	0.00146903	0.957154134
GTPBP6	GTP binding protein 6 (putative)	8225	yellow	0.00804675	0.768536867	-0.095768122	0.000447284	0.217828056	7.42E-16	0.200137731	1.42E-13	0.448277991	3.21E-67	0.161101149	3.02E-09	0.178306638	4.91E-11	0.249422174	1.88E-20	0.221996412	2.01E-16	0.209103494	1.05E-14	0.378377937	7.33E-47	0.052466722	0.054841791	0.016069593	0.55671175	-0.019114965	0.484468624	0.108727035	6.66E-05	-0.04698659	0.085553194	-0.24533092	8.10E-20	-0.427683742	1.03E-60	0.013239099	0.628244268
LOC145783	hypothetical LOC145783	145783	yellow	-0.137656315	4.23E-07	-0.345422976	7.62E-39	0.217675184	7.78E-16	0.018364795	0.501780349	0.566127432	2.09E-114	0.469672774	1.80E-74	0.378717684	5.99E-47	0.146076317	7.83E-08	0.270237346	7.42E-24	0.1826721	1.61E-11	0.460076838	3.73E-71	0.184579526	9.83E-12	-0.114718959	2.56E-05	-0.106737696	9.05E-05	-0.052201146	0.05608238	-0.188350151	3.64E-12	-0.040833606	0.135179923	-0.163792874	1.63E-09	0.075282644	0.005830962
RPS27L	ribosomal protein S27-like	51065	yellow	-0.107817481	7.67E-05	-0.463582552	2.36E-72	0.214203324	2.26E-15	-0.060479008	0.0268387	0.731604529	7.03E-225	0.649803207	1.36E-161	0.436887294	1.45E-63	0.460078819	3.73E-71	0.101966278	0.000184869	0.117152406	1.71E-05	0.347252933	2.89E-39	0.280518596	1.19E-25	-0.200822022	1.17E-13	-0.121092088	8.79E-06	-0.146584634	7.05E-08	-0.301609096	1.40E-29	-0.087519317	0.001341744	-0.298461507	5.66E-29	-0.093628082	0.000599827
ARMCX6	armadillo repeat containing, X-linked 6	54470	yellow	0.134944064	7.13E-07	-0.253623338	4.10E-21	0.210682541	6.56E-15	-0.24190556	2.69E-19	0.566892354	8.88E-115	0.538041833	2.03E-101	0.471971349	2.79E-75	0.375057109	5.20E-46	0.1397784	2.79E-07	0.243317059	1.65E-19	0.425806716	3.84E-60	0.173280528	1.71E-10	-0.128960427	2.18E-06	-0.067011654	0.014147423	-0.109639479	5.77E-05	-0.205027119	3.49E-14	-0.041134842	0.132320426	-0.250228343	1.41E-20	-0.072897741	0.007595129
RPL19	ribosomal protein L19	6143	yellow	-0.169752949	4.01E-10	-0.465408453	5.53E-73	0.210129185	7.74E-15	-0.016698048	0.541384272	0.856109021	0	0.549669599	1.20E-106	0.4288424	4.56E-61	0.354808274	4.95E-41	0.20237416	7.51E-14	0.179886425	3.29E-11	0.457951927	1.96E-70	0.342041967	4.49E-38	-0.038771314	0.156053021	-0.066719907	0.014574111	-0.115492791	2.26E-05	-0.26593646	3.97E-23	-0.103909057	0.000138706	-0.21939629	4.55E-16	-0.020138008	0.461390666
NPB	neuropeptide B	256933	yellow	-0.185327672	8.08E-12	-0.305402318	2.53E-30	0.209621988	9.01E-15	-0.096453729	0.000406638	0.530001444	6.38E-98	0.275178189	1.04E-24	0.215559801	1.49E-15	0.053910819	0.0484895	0.250911368	1.10E-20	-0.024038815	0.379254386	0.301925901	1.21E-29	0.2099921	8.07E-15	-0.005065979	0.853014583	-0.149949023	3.49E-08	0.149877836	3.54E-08	0.120897463	9.09E-06	0.148802162	4.44E-08	0.030232755	0.268760925	0.070838682	0.009487733
AKR1C3	aldo-keto reductase family 1, member C3 (3-alpha hydroxysteroid dehydrogenase, type II)	8644	yellow	-0.110521181	5.03E-05	-0.409360594	2.73E-55	0.20954632	9.21E-15	0.229004018	2.10E-17	0.518244939	5.65E-93	0.259564649	4.51E-22	0.240828847	3.91E-19	0.499562548	1.68E-85	0.186135012	6.54E-12	-0.079964917	0.003398833	0.283639423	3.26E-26	0.02006365	0.463047092	-0.112538917	3.65E-05	-0.179677192	3.47E-11	-0.042211437	0.122482107	-0.142753831	1.54E-07	-0.00840014	0.758680432	-0.294123861	3.78E-28	-0.130234168	1.72E-06
AIF1	allograft inflammatory factor 1	199	yellow	-0.204374931	4.21E-14	-0.363318983	4.42E-43	0.209461795	9.45E-15	0.087711786	0.001309097	0.756420206	6.01E-249	0.31154592	1.51E-31	0.273662429	1.91E-24	0.259964341	3.88E-22	0.27669892	5.63E-25	-0.143898023	1.22E-07	0.146545792	7.10E-08	0.314065681	4.64E-32	0.117153275	1.71E-05	-0.018789764	0.49193336	0.069532073	0.010896573	0.045986382	0.092433722	0.106313071	9.65E-05	-0.100271184	0.000236575	0.070595152	0.009737312
RPL22L1	ribosomal protein L22-like 1	200916	yellow	0.005484435	0.841028998	-0.418822396	4.76E-58	0.207045426	1.93E-14	-0.077817607	0.004368397	0.647314105	5.66E-160	0.681288313	1.71E-183	0.309492958	3.89E-31	0.455952316	9.23E-70	0.152391338	2.07E-08	0.367019759	5.44E-44	0.436618662	1.76E-63	0.209938501	8.20E-15	-0.231301453	9.85E-18	-0.180509466	2.81E-11	-0.270655047	6.29E-24	-0.354896668	4.72E-41	-0.067075021	0.014056216	-0.181675868	2.08E-11	-0.004201448	0.877881443
GNAI2	guanine nucleotide binding protein (G protein), alpha inhibiting activity polypeptide 2	2771	yellow	-0.252291709	6.67E-21	-0.403423819	1.32E-53	0.207004729	1.95E-14	-0.055548774	0.042043307	0.568058448	2.40E-115	0.301563487	1.43E-29	0.363854563	3.27E-43	0.333910425	2.92E-36	0.338253522	3.19E-37	-0.003596369	0.895358992	0.475876919	1.14E-76	0.070061026	0.010305275	-0.072555017	0.007884566	-0.197301066	3.16E-13	-0.052573613	0.054348961	-0.140005928	2.67E-07	-0.108580073	6.81E-05	-0.337501257	4.69E-37	0.117214284	1.70E-05
RPL13A	ribosomal protein L13a	23521	yellow	-0.196297048	4.18E-13	-0.501040754	4.47E-86	0.20599008	2.63E-14	-0.031527405	0.248786378	0.849253047	0	0.483583243	1.81E-79	0.366492423	7.34E-44	0.341698136	5.37E-38	0.295339726	2.23E-28	0.207594157	1.64E-14	0.549890276	9.53E-107	0.32717236	8.46E-35	-0.02892892	0.289961744	-0.128666089	2.30E-06	-0.059118776	0.030466209	-0.200411114	1.31E-13	-0.076430518	0.005121342	-0.152146074	2.18E-08	0.043897614	0.10823192
RPSAP15	ribosomal protein SA pseudogene 15	220885	yellow	-0.131619711	1.33E-06	-0.435732119	3.34E-63	0.205941156	2.67E-14	0.073772626	0.006898945	0.733120648	2.85E-226	0.414171578	1.11E-56	0.295996661	1.67E-28	0.296743145	1.21E-28	0.154403867	1.34E-08	0.051551197	0.059217241	0.381950885	8.68E-48	0.16422764	1.47E-09	-0.03375591	0.216879657	-0.170948224	3.01E-10	0.03111738	0.254997002	-0.10280952	0.000163295	0.105743296	0.000105273	-0.088410573	0.001196624	-0.11196125	4.00E-05
RPL31	ribosomal protein L31	6160	yellow	-0.132499859	1.13E-06	-0.220210334	3.53E-16	0.204028848	4.66E-14	0.215245966	1.65E-15	0.673705511	5.70E-178	0.294648313	3.01E-28	0.170302987	3.51E-10	0.303027834	7.40E-30	0.114754974	2.55E-05	-0.1629988	1.96E-09	-0.03162142	0.24737736	0.217759775	7.58E-16	0.162571442	2.16E-09	0.037176727	0.173800877	-0.030543782	0.263864687	-0.059114251	0.030478949	0.068747308	0.011829347	-0.07263799	0.007813603	-0.055602903	0.041843284
RPL21	ribosomal protein L21	6144	yellow	-0.23654955	1.70E-18	-0.461832303	9.40E-72	0.203394273	5.60E-14	-0.043365395	0.112580816	0.813631661	1.88945524939068e-317	0.50623827	4.05E-88	0.328296312	4.85E-35	0.249746568	1.68E-20	0.235871677	2.13E-18	0.003576947	0.895920884	0.274842224	1.19E-24	0.367049046	5.35E-44	0.027149767	0.320661114	-0.094104068	0.000562216	-0.03282216	0.229871263	-0.064449967	0.018299198	0.148335983	4.89E-08	0.016203306	0.553432973	0.017457088	0.523156966
RPLP0	ribosomal protein, large, P0	6175	yellow	-0.197662375	2.86E-13	-0.375556127	3.88E-46	0.203048848	6.18E-14	0.033571205	0.219406735	0.793274598	1.34E-290	0.413802876	1.42E-56	0.301509089	1.46E-29	0.355029814	4.38E-41	0.230939159	1.11E-17	0.163558862	1.72E-09	0.416998621	1.64E-57	0.366518543	7.23E-44	-0.007656907	0.779453457	-0.029123287	0.286731862	-0.118207613	1.44E-05	-0.16651636	8.64E-10	-0.167293411	7.20E-10	-0.3266692	1.08E-34	0.06336774	0.020351317
CRELD2	cysteine-rich with EGF-like domains 2	79174	yellow	-0.338611029	2.65E-37	-0.48630796	1.79E-80	0.202954697	6.35E-14	0.254158025	3.37E-21	0.53468852	6.00E-100	0.311332418	1.66E-31	0.202075898	8.18E-14	0.231421278	9.47E-18	0.277098405	4.79E-25	0.158579061	5.33E-09	0.481525361	1.03E-78	0.075213624	0.005876327	-0.130594803	1.61E-06	-0.235656795	2.29E-18	0.165869872	1.01E-09	-0.067612832	0.013302761	-0.05210806	0.056522704	-0.231793477	8.37E-18	0.076960647	0.004820738
CD53	CD53 molecule	963	yellow	-0.02733068	0.317445922	-0.141573938	1.95E-07	0.201940727	8.50E-14	0.050198777	0.066206903	0.496485162	2.58E-84	0.195591446	5.08E-13	0.193622973	8.75E-13	0.167413174	7.00E-10	0.327503189	7.18E-35	-0.172801691	1.92E-10	0.092049033	0.000742008	0.194305705	7.25E-13	0.114347687	2.72E-05	0.011451232	0.675357579	0.025043382	0.359653025	0.054876576	0.044595352	0.089106294	0.001093564	-0.081697304	0.002764079	0.174060232	1.41E-10
LCP1	lymphocyte cytosolic protein 1 (L-plastin)	3936	yellow	-0.152380917	2.08E-08	-0.399406784	1.75E-52	0.19860148	2.19E-13	-0.125262858	4.24E-06	0.634244964	1.05E-151	0.42078533	1.24E-58	0.31138505	1.62E-31	0.26165664	2.05E-22	0.351304353	3.31E-40	0.098592616	0.0003009	0.367968882	3.16E-44	0.229056765	2.06E-17	-0.017707707	0.517208536	-0.118587566	1.35E-05	-0.032011021	0.241597849	-0.067374305	0.013632414	0.027840801	0.308494102	-0.117906369	1.51E-05	0.191398294	1.60E-12
UBXN1	UBX domain protein 1	51035	yellow	-0.018826116	0.49109588	-0.353510711	1.00E-40	0.1980834	2.54E-13	-0.057698664	0.034694485	0.715440531	1.33E-210	0.524181561	1.90E-95	0.431210535	8.53E-62	0.32170462	1.22E-33	0.201989787	8.38E-14	0.367932943	3.23E-44	0.514721672	1.57E-91	0.274631176	1.29E-24	-0.068161328	0.012571291	-0.063902546	0.019313424	0.019580208	0.473896841	-0.173050542	1.81E-10	-0.102270738	0.000176788	-0.202011282	8.33E-14	-0.00934964	0.732395216
C9orf21	chromosome 9 open reading frame 21	195827	yellow	-0.252439926	6.32E-21	-0.398510388	3.09E-52	0.195247995	5.59E-13	0.21298971	3.27E-15	0.483790885	1.52E-79	0.450558537	5.73E-68	0.249546769	1.80E-20	0.298911031	4.64E-29	0.159859508	4.00E-09	0.12801585	2.59E-06	0.341650349	5.51E-38	0.186581024	5.81E-12	-0.254951668	2.51E-21	-0.132996495	1.03E-06	-0.0762385	0.005234333	-0.29532889	2.24E-28	-0.101619579	0.000194492	-0.258839768	5.92E-22	0.02191073	0.422893109
HMHA1	histocompatibility (minor) HA-1	23526	yellow	-0.145251286	9.27E-08	-0.428328026	6.56E-61	0.195241209	5.60E-13	0.023428217	0.391483128	0.740664361	2.40E-233	0.404720515	5.70E-54	0.336334299	8.53E-37	0.37600872	2.98E-46	0.240090614	5.05E-19	0.042710905	0.118116151	0.280929386	1.00E-25	0.230313488	1.37E-17	0.064180705	0.018792096	-0.074271833	0.006527883	0.009294509	0.733913218	-0.076192267	0.005261871	0.021937891	0.422318277	-0.133473901	9.42E-07	0.011242082	0.68095763
EIF4E2	eukaryotic translation initiation factor 4E family member 2	9470	yellow	-0.177228373	6.43E-11	-0.383439828	3.54E-48	0.193403466	9.29E-13	0.177796758	5.58E-11	0.576426647	1.72E-119	0.44751883	5.68E-67	0.289140325	3.22E-27	0.331543297	9.62E-36	0.18472524	9.46E-12	0.327575637	6.93E-35	0.446965749	8.60E-67	0.187552692	4.50E-12	-0.113715491	3.02E-05	-0.081420725	0.002857557	-0.103245671	0.000153088	-0.279396518	1.88E-25	-0.222926745	1.49E-16	-0.323806856	4.40E-34	0.010781813	0.693343095
RPS4X	ribosomal protein S4, X-linked	6191	yellow	-0.249562363	1.79E-20	-0.456834586	4.66E-70	0.193287173	9.59E-13	0.032062762	0.240837504	0.84104291	0	0.499153288	2.42E-85	0.315887971	1.97E-32	0.332324095	6.50E-36	0.186261598	6.32E-12	0.036031919	0.187442764	0.255632121	1.96E-21	0.397738748	5.05E-52	0.011821838	0.665478644	-0.035742404	0.191014591	-0.117742353	1.55E-05	-0.138517834	3.57E-07	0.018817006	0.491305681	-0.114660384	2.59E-05	-0.000465308	0.98642292
RGS10	regulator of G-protein signaling 10	6001	yellow	-0.193113515	1.01E-12	-0.358071755	8.25E-42	0.192115512	1.32E-12	0.087931474	0.001272728	0.765985521	5.15E-259	0.359934488	2.94E-42	0.316954115	1.19E-32	0.310988958	1.95E-31	0.23062386	1.23E-17	-0.085558812	0.001719751	0.159624735	4.22E-09	0.327592089	6.87E-35	0.105864657	0.000103354	0.019600918	0.473429215	0.015834131	0.562508377	-0.036273365	0.184501838	0.042717364	0.118060497	-0.133216841	9.89E-07	0.027234957	0.319144468
NCRNA00275	non-protein coding RNA 275	441951	yellow	-0.126383986	3.47E-06	-0.378166645	8.31E-47	0.191949759	1.38E-12	-0.116315474	1.97E-05	0.828603459	0	0.584894691	8.30E-124	0.460785137	2.14E-71	0.310102541	2.94E-31	0.216281291	1.20E-15	0.096437667	0.00040755	0.275931419	7.68E-25	0.389577702	8.35E-50	0.046184823	0.091034427	0.003279997	0.904518105	-0.146535918	7.12E-08	-0.15270562	1.94E-08	-0.049334328	0.071020415	-0.141600713	1.94E-07	0.06378382	0.019539757
RPL11	ribosomal protein L11	6135	yellow	-0.146412237	7.30E-08	-0.508215745	6.62E-89	0.191872582	1.41E-12	-0.158254106	5.73E-09	0.853735782	0	0.649294224	2.92E-161	0.464546702	1.10E-72	0.314650864	3.52E-32	0.226232384	5.18E-17	0.141125728	2.13E-07	0.375306978	4.49E-46	0.376874594	1.79E-46	-0.031084171	0.255504693	-0.116522429	1.90E-05	-0.062730945	0.021650247	-0.13213683	1.21E-06	0.083884617	0.002117529	-0.036883101	0.177227048	0.006393601	0.81511835
C1QL1	complement component 1, q subcomponent-like 1	10882	yellow	-0.257662956	9.20E-22	-0.201747865	8.98E-14	0.191475298	1.57E-12	0.228105233	2.82E-17	0.467826536	7.99E-74	0.003196758	0.906930057	0.095302101	0.000477041	0.36016394	2.59E-42	0.331459001	1.00E-35	-0.141231623	2.09E-07	0.230433603	1.31E-17	0.040566548	0.137754648	0.126129997	3.63E-06	-0.04195353	0.124785309	0.006557494	0.810468057	-0.0202951	0.457902088	-0.135470993	6.44E-07	-0.340567441	9.66E-38	0.173587857	1.58E-10
RPS21	ribosomal protein S21	6227	yellow	-0.087774697	0.001298586	-0.176098997	8.52E-11	0.191261321	1.66E-12	0.008001744	0.769794838	0.679857166	1.94E-182	0.335824283	1.11E-36	0.151244157	2.65E-08	0.166279115	9.14E-10	0.146621251	6.99E-08	-0.077470958	0.00454653	0.033075744	0.226289578	0.351080464	3.74E-40	0.177563713	5.91E-11	0.064330743	0.018516031	-0.021988812	0.421241795	0.02273062	0.405743075	0.160081299	3.80E-09	0.046084438	0.091740144	0.018345695	0.502225346
PLAC9	placenta-specific 9	219348	yellow	-0.347461116	2.59E-39	-0.256337274	1.51E-21	0.191039576	1.77E-12	0.376343173	2.44E-46	0.51059602	7.37E-90	0.083290587	0.002277815	0.040199193	0.141357855	0.349248923	9.99E-40	0.160021786	3.86E-09	-0.215493989	1.53E-15	0.019760565	0.469832902	0.117263401	1.68E-05	0.095956791	0.000435737	-0.015036526	0.582357336	0.075356923	0.005782493	0.033818882	0.216022901	-0.075755209	0.005528739	-0.293888455	4.19E-28	0.032507874	0.234365958
SNHG12	small nucleolar RNA host gene 12 (non-protein coding)	85028	yellow	-0.146044279	7.88E-08	-0.261138321	2.49E-22	0.190053425	2.31E-12	0.009636384	0.724516902	0.5753259	6.14E-119	0.481067664	1.51E-78	0.21662154	1.08E-15	0.131976449	1.25E-06	0.198322303	2.37E-13	0.336761619	6.85E-37	0.355902228	2.72E-41	0.270637388	6.34E-24	-0.036756989	0.178713915	-0.015748291	0.564628826	-0.136158464	5.65E-07	-0.22782701	3.08E-17	-0.05713941	0.036491986	-0.072165615	0.008225369	0.096111291	0.000426488
ST5	suppression of tumorigenicity 5	6764	yellow	-0.082985834	0.002364286	-0.308334003	6.64E-31	0.188333565	3.65E-12	0.0105965	0.698353181	0.402089764	3.13E-53	0.279975532	1.48E-25	0.143819666	1.24E-07	0.487071219	9.29E-81	0.184286103	1.06E-11	0.286301141	1.07E-26	0.500907181	5.03E-86	-0.050532183	0.064423627	-0.174314722	1.33E-10	-0.211287632	5.47E-15	-0.224162034	1.01E-16	-0.319590195	3.38E-33	-0.218891006	5.33E-16	-0.338825976	2.38E-37	0.013570809	0.619659887
C2orf40	chromosome 2 open reading frame 40	84417	yellow	-0.1557593	9.96E-09	-0.454683958	2.45E-69	0.186744702	5.57E-12	0.025096833	0.358628208	0.460480771	2.72E-71	0.407704067	8.11E-55	0.128109657	2.54E-06	0.274772521	1.22E-24	0.213560533	2.75E-15	0.127844661	2.67E-06	0.341900853	4.83E-38	0.167194631	7.37E-10	-0.247576981	3.65E-20	-0.233443509	4.83E-18	-0.083553799	0.002205471	-0.216041697	1.29E-15	0.002705132	0.921192365	-0.113564642	3.09E-05	0.11368915	3.03E-05
RBM42	RNA binding motif protein 42	79171	yellow	-0.092756813	0.000674797	-0.31976814	3.10E-33	0.185143508	8.48E-12	-0.046954281	0.085768797	0.541227296	7.87E-103	0.386387307	5.91E-49	0.356384833	2.09E-41	0.252471504	6.24E-21	0.207953588	1.48E-14	0.316581933	1.42E-32	0.60982152	2.77E-137	0.160991045	3.10E-09	-0.120223811	1.02E-05	-0.112377427	3.74E-05	-0.024001006	0.380004715	-0.255400602	2.13E-21	-0.206035642	2.60E-14	-0.350315245	5.64E-40	0.016180928	0.553981051
FCGR1A	Fc fragment of IgG, high affinity Ia, receptor (CD64)	2209	yellow	-0.184974745	8.86E-12	-0.313928525	4.95E-32	0.183083275	1.45E-11	0.123089071	6.22E-06	0.660996677	4.48E-169	0.225695437	6.15E-17	0.21917213	4.88E-16	0.268437468	1.50E-23	0.377639261	1.14E-46	-0.127448243	2.87E-06	0.166267258	9.16E-10	0.255383602	2.14E-21	0.151071037	2.75E-08	-0.018182751	0.506030152	0.17586675	9.03E-11	0.150098399	3.38E-08	0.193101543	1.01E-12	-0.008673667	0.751078186	0.150255344	3.27E-08
P2RY13	purinergic receptor P2Y, G-protein coupled, 13	53829	yellow	-0.232469516	6.68E-18	-0.317508281	9.12E-33	0.181616423	2.12E-11	0.145773875	8.33E-08	0.683355886	4.98E-185	0.257290777	1.06E-21	0.236581187	1.68E-18	0.253118339	4.93E-21	0.273841412	1.78E-24	-0.193909309	8.09E-13	0.068897845	0.01164512	0.303905706	4.98E-30	0.153841003	1.51E-08	0.031040106	0.25617943	0.080177998	0.003314181	0.057443632	0.035504595	0.112809162	3.49E-05	-0.074103968	0.006650607	0.087540476	0.001338119
RPS17	ribosomal protein S17	6218	yellow	-0.206034602	2.60E-14	-0.377397759	1.31E-46	0.180341481	2.93E-11	0.045715092	0.094374559	0.847479727	0	0.473160304	1.06E-75	0.349942544	6.89E-40	0.348583836	1.42E-39	0.179110091	4.01E-11	0.050877635	0.062617889	0.235358399	2.54E-18	0.410963794	9.43E-56	0.096320393	0.000414263	0.03911925	0.152369722	-0.05016232	0.06640434	-0.128641325	2.31E-06	-0.040460205	0.138790366	-0.157943012	6.14E-09	0.005768993	0.832899374
RRP8	ribosomal RNA processing 8, methyltransferase, homolog (yeast)	23378	yellow	0.106436805	9.47E-05	-0.248793315	2.36E-20	0.180186368	3.05E-11	-0.153380602	1.67E-08	0.47968864	4.79E-78	0.587657969	3.04E-125	0.454375327	3.11E-69	0.432204597	4.20E-62	0.155351056	1.09E-08	0.457660231	2.46E-70	0.544878989	1.81E-104	0.08337028	0.002255685	-0.202583845	7.07E-14	-0.098260912	0.00031541	-0.168215378	5.79E-10	-0.317674822	8.43E-33	-0.227499968	3.43E-17	-0.381168538	1.39E-47	-0.036568596	0.180952315
FAHD2B	fumarylacetoacetate hydrolase domain containing 2B	151313	yellow	-0.115542193	2.24E-05	-0.358113674	8.06E-42	0.179918877	3.26E-11	-0.141585415	1.95E-07	0.618928144	1.63E-142	0.383484304	3.45E-48	0.418257596	6.99E-58	0.229499475	1.78E-17	0.506480686	3.25E-88	0.178828405	4.30E-11	0.521709912	2.06E-94	0.191006577	1.78E-12	0.049810257	0.068336014	-0.106477631	9.42E-05	-0.040932401	0.134236897	-0.030471612	0.264995289	-0.139274104	3.08E-07	-0.274375737	1.43E-24	0.284699918	2.10E-26
FAHD2A	fumarylacetoacetate hydrolase domain containing 2A	51011	yellow	-0.183746383	1.22E-11	-0.33669822	7.08E-37	0.179467788	3.66E-11	-0.000205664	0.993998757	0.521843432	1.81E-94	0.276079057	7.23E-25	0.318827898	4.86E-33	0.159263197	4.57E-09	0.471189855	5.28E-75	-0.00134877	0.960658672	0.383405465	3.61E-48	0.099692486	0.000257135	0.050274928	0.065796058	-0.130266172	1.71E-06	-0.016988853	0.5343637	0.015005297	0.583141108	-0.02565384	0.348058016	-0.228125832	2.80E-17	0.287053927	7.80E-27
ULK2	unc-51-like kinase 2 (C. elegans)	9706	yellow	-0.113000025	3.38E-05	-0.131576058	1.34E-06	0.177929185	5.39E-11	-0.060024794	0.028006239	0.441589908	4.67E-65	0.494886406	1.06E-83	0.302822839	8.11E-30	0.093789965	0.000586781	0.173684456	1.55E-10	0.147508581	5.82E-08	0.15776967	6.39E-09	0.168352606	5.60E-10	0.016114732	0.555603828	0.048478255	0.076066054	-0.300612885	2.18E-29	-0.21762012	7.92E-16	-0.150733495	2.95E-08	-0.160467242	3.49E-09	0.120430093	9.85E-06
NARS2	asparaginyl-tRNA synthetase 2, mitochondrial (putative)	79731	yellow	0.057478885	0.035391661	-0.018022895	0.509777533	0.174387819	1.30E-10	-0.116875799	1.79E-05	0.266083831	3.75E-23	0.20729922	1.79E-14	0.017824444	0.514449776	-0.008096595	0.767144327	0.167239005	7.29E-10	0.06784981	0.012982241	0.205112927	3.40E-14	0.158794607	5.08E-09	-0.045915361	0.092938693	-0.03624214	0.184880238	-0.120383856	9.93E-06	-0.163941531	1.57E-09	0.016516679	0.545786012	-0.055880174	0.040831259	0.16013301	3.76E-09
RPL36AL	ribosomal protein L36a-like	6166	yellow	-0.114292648	2.75E-05	-0.305746799	2.16E-30	0.173532898	1.61E-10	-0.106105704	9.96E-05	0.681515459	1.16E-183	0.437020628	1.32E-63	0.281020445	9.65E-26	0.161009651	3.08E-09	0.135992803	5.83E-07	-0.058665874	0.031763912	0.100103017	0.000242385	0.319723126	3.17E-33	0.105452138	0.000110017	-0.02760159	0.312670906	-0.020555384	0.45215461	0.02433933	0.373322993	0.237984582	1.04E-18	0.105183667	0.000114569	-0.026161419	0.338599953
RPS26P11	ribosomal protein S26 pseudogene 11	441502	yellow	-0.163261951	1.84E-09	-0.429419417	3.04E-61	0.171340281	2.74E-10	-0.035860812	0.18954775	0.871343047	0	0.527292009	9.17E-97	0.437466109	9.52E-64	0.377132428	1.53E-46	0.165688795	1.05E-09	0.083719144	0.002161107	0.283228715	3.87E-26	0.456949891	4.26E-70	0.030748553	0.260674902	0.023322294	0.393628569	-0.068482126	0.012160164	-0.166844363	8.00E-10	-0.067317022	0.013712646	-0.12717381	3.01E-06	-0.01982841	0.468309152
RPS13	ribosomal protein S13	6207	yellow	-0.055967843	0.040515614	-0.420646185	1.37E-58	0.171175361	2.85E-10	-0.140924377	2.22E-07	0.839834682	0	0.595319453	2.67E-129	0.452755588	1.08E-68	0.37421818	8.51E-46	0.202549813	7.14E-14	0.178184377	5.06E-11	0.346634755	4.02E-39	0.405980427	2.51E-54	-0.00215806	0.93709282	-0.029753559	0.276425789	-0.117344425	1.66E-05	-0.208944329	1.10E-14	-0.065949245	0.01575619	-0.134185529	8.23E-07	0.034798064	0.203012702
FABP6	fatty acid binding protein 6, ileal	2172	yellow	-0.091778766	0.000769273	-0.443697912	9.83E-66	0.170639155	3.24E-10	0.121781555	7.81E-06	0.614788654	4.09E-140	0.323448904	5.24E-34	0.309747075	3.46E-31	0.350199943	6.00E-40	0.126048213	3.69E-06	-0.152905595	1.85E-08	0.111793113	4.11E-05	0.204112688	4.55E-14	-0.060174252	0.027617325	-0.088514958	0.00118061	0.10499321	0.000117905	-0.007965431	0.770810291	0.103204532	0.000154024	-0.133182805	9.95E-07	-0.080736234	0.003101424
VSIG4	V-set and immunoglobulin domain containing 4	11326	yellow	-0.125115824	4.35E-06	-0.276354151	6.47E-25	0.170498607	3.35E-10	0.175123161	1.09E-10	0.597176159	2.67E-130	0.266908964	2.73E-23	0.203877	4.87E-14	0.372734121	2.02E-45	0.440804132	8.32E-65	0.027485244	0.314715785	0.209833925	8.45E-15	0.213776093	2.58E-15	0.088738285	0.00114701	-0.024383837	0.372449439	0.041821095	0.125981045	0.056530473	0.038538715	0.074441335	0.006406031	-0.099651717	0.000258645	0.25166194	8.38E-21
C1QB	complement component 1, q subcomponent, B chain	713	yellow	-0.173471633	1.63E-10	-0.413599645	1.62E-56	0.170181054	3.62E-10	0.031089264	0.255426784	0.768536024	8.83E-262	0.328384417	4.65E-35	0.334761862	1.90E-36	0.334009839	2.78E-36	0.297420051	8.96E-29	-0.064291659	0.0185876	0.233663258	4.49E-18	0.313860891	5.11E-32	0.082247228	0.002586456	-0.045425673	0.096480928	0.080491278	0.003193202	0.044959432	0.099953027	0.060279355	0.027346626	-0.121622788	8.02E-06	0.076088264	0.005324299
ETFB	electron-transfer-flavoprotein, beta polypeptide	2109	yellow	-0.113827927	2.96E-05	-0.44829294	3.18E-67	0.170026759	3.76E-10	0.048075266	0.078540388	0.811570682	1.38820010947898e-314	0.424454011	9.86E-60	0.50578323	6.13E-88	0.491186194	2.67E-82	0.147231693	6.16E-08	-0.068049639	0.012717287	0.252925949	5.29E-21	0.31814154	6.75E-33	0.030212491	0.269082073	0.022756401	0.405210617	0.06729535	0.013743108	-0.048880409	0.073660539	-0.038541209	0.158525769	-0.252755253	5.63E-21	-0.139518593	2.94E-07
DAPL1	death associated protein-like 1	92196	yellow	-0.312833779	8.26E-32	-0.330177174	1.91E-35	0.168493873	5.42E-10	0.147596698	5.71E-08	0.412493828	3.40E-56	0.158703693	5.18E-09	0.124250243	5.07E-06	0.277473028	4.11E-25	0.038760332	0.156170363	-0.251134873	1.02E-20	0.034354601	0.208832505	0.108330218	7.08E-05	-0.054380097	0.046563029	-0.110125333	5.35E-05	-0.022954711	0.401128873	-0.05226572	0.055778606	0.012956203	0.635605312	-0.202465424	7.31E-14	-0.081137896	0.00295612
RPL21P44	ribosomal protein L21 pseudogene 44	402176	yellow	-0.24133955	3.28E-19	-0.455158518	1.70E-69	0.168329224	5.63E-10	-0.062626528	0.021869976	0.78788102	5.47E-284	0.476925249	4.78E-77	0.332262154	6.71E-36	0.227873353	3.04E-17	0.19008526	2.29E-12	-0.009465966	0.729195707	0.239806552	5.57E-19	0.370897249	5.87E-45	0.083035064	0.002350117	-0.071726791	0.008625156	0.026630058	0.330015229	-0.004759261	0.861821476	0.197023025	3.41E-13	0.096715658	0.000392041	-0.020037914	0.463621171
CYBB	cytochrome b-245, beta polypeptide	1536	yellow	-0.126665412	3.30E-06	-0.380354961	2.26E-47	0.168160676	5.86E-10	0.096479599	0.000405174	0.643219315	2.44E-157	0.416968242	1.68E-57	0.302104682	1.12E-29	0.348593182	1.42E-39	0.379153697	4.63E-47	0.070874164	0.009451849	0.241778108	2.81E-19	0.23039184	1.33E-17	0.04249027	0.120029494	-0.047022902	0.0853114	-0.00401655	0.883216274	-0.019201814	0.482485506	0.123347606	5.94E-06	0.001983515	0.94217148	0.159385747	4.45E-09
CHMP4A	chromatin modifying protein 4A	29082	yellow	-0.238942604	7.49E-19	-0.457595006	2.59E-70	0.167587874	6.71E-10	0.087946839	0.00127022	0.801431025	5.57E-301	0.436279323	2.25E-63	0.454308552	3.27E-69	0.501313202	3.50E-86	0.169748354	4.01E-10	-0.055193337	0.043376931	0.214098325	2.34E-15	0.268599442	1.41E-23	0.051929017	0.057377707	0.010192865	0.709311005	-0.099562725	0.000261969	-0.132035391	1.23E-06	-0.113148676	3.30E-05	-0.281074422	9.44E-26	-0.036392781	0.183059959
RPSAP9	ribosomal protein SA pseudogene 9	653162	yellow	-0.170304822	3.51E-10	-0.457221204	3.46E-70	0.166185638	9.34E-10	0.058719187	0.031608734	0.689403675	1.36E-189	0.331932445	7.91E-36	0.250318036	1.36E-20	0.25646124	1.44E-21	0.11486996	2.50E-05	-0.005400543	0.843429027	0.331833318	8.32E-36	0.169410605	4.35E-10	-0.009191356	0.736756268	-0.187388219	4.70E-12	0.147628007	5.67E-08	0.00526729	0.847244162	0.221734291	2.18E-16	0.012028909	0.659983935	-0.147059218	6.39E-08
LOC100286946	ribosomal protein S3A pseudogene	100286946	yellow	-0.074329248	0.006486377	-0.306067963	1.87E-30	0.16468087	1.33E-09	-0.149843019	3.56E-08	0.391272721	2.92E-50	0.343480172	2.12E-38	0.089146345	0.001087888	-0.01285579	0.638226834	0.100752277	0.000220667	-0.098579453	0.000301464	0.070141593	0.010217761	0.046923003	0.085977944	0.002996508	0.912736058	-0.269808925	8.78E-24	0.215723734	1.42E-15	0.234187801	3.76E-18	0.61808832	5.04E-142	0.422172034	4.78E-59	-0.063413934	0.02025979
ARHGDIB	Rho GDP dissociation inhibitor (GDI) beta	397	yellow	-0.136627132	5.16E-07	-0.336448718	8.04E-37	0.162381902	2.25E-09	0.148620686	4.61E-08	0.635539452	1.65E-152	0.311978767	1.23E-31	0.263726321	9.30E-23	0.379844192	3.07E-47	0.199370879	1.77E-13	-0.118271584	1.42E-05	0.093535625	0.000607399	0.229324153	1.89E-17	0.078060362	0.00424744	-0.004114192	0.880398366	0.018944475	0.488374413	0.000817293	0.976154834	0.035924962	0.188756533	-0.14575896	8.35E-08	-0.01970969	0.470977316
POLR3C	polymerase (RNA) III (DNA directed) polypeptide C (62kD)	10623	yellow	-0.058086565	0.033492576	-0.077157195	0.004713403	0.160260678	3.65E-09	0.048922103	0.073414738	0.418911644	4.48E-58	0.197055041	3.38E-13	0.104647265	0.0001242	0.106502067	9.38E-05	0.080584192	0.003158103	0.061608914	0.024114854	0.165188974	1.18E-09	0.358922183	5.15E-42	-0.039808193	0.145271987	0.11603579	2.06E-05	-0.199935433	1.51E-13	-0.27285455	2.63E-24	-0.239622609	5.93E-19	-0.273910608	1.73E-24	0.021178595	0.438559953
ROCK2	Rho-associated, coiled-coil containing protein kinase 2	9475	yellow	0.328294606	4.86E-35	0.372561756	2.23E-45	0.159433691	4.40E-09	0.268864609	1.27E-23	-0.459391547	6.38E-71	-0.128432568	2.40E-06	-0.335455348	1.33E-36	-0.250869195	1.12E-20	-0.033733198	0.217189264	0.084970701	0.001850912	0.037793039	0.166770596	-0.404655876	5.94E-54	-0.247293672	4.04E-20	-0.189703132	2.53E-12	0.060446352	0.026921218	-0.085811109	0.001666147	0.176836421	7.09E-11	0.046696657	0.087503716	-0.14046768	2.43E-07
DPYSL3	dihydropyrimidinase-like 3	1809	yellow	-0.488836613	2.04E-81	-0.343013782	2.70E-38	0.157730632	6.44E-09	0.279515088	1.79E-25	0.503275594	5.97E-87	0.106079515	0.000100036	0.096108643	0.000426645	0.338936491	2.24E-37	0.115240226	2.35E-05	-0.236392769	1.79E-18	0.037337865	0.171941777	0.168627894	5.25E-10	0.061941239	0.023360731	-5.64E-05	0.998354585	-0.079294335	0.00367823	-0.090067355	0.000964646	-0.106958484	8.75E-05	-0.256591602	1.37E-21	0.006021695	0.825694743
ARHGAP4	Rho GTPase activating protein 4	393	yellow	-0.224640901	8.64E-17	-0.236658727	1.63E-18	0.156602924	8.27E-09	0.032950411	0.228054806	0.450752035	4.95E-68	0.211668214	4.88E-15	0.063976471	0.019173655	0.100859153	0.000217272	0.332105265	7.26E-36	0.228792771	2.25E-17	0.332734333	5.29E-36	0.309753563	3.45E-31	0.043309141	0.113048414	0.011372221	0.67747104	-0.048594892	0.075361882	-0.043771535	0.109249942	-0.134987485	7.07E-07	-0.111876323	4.05E-05	0.25753139	9.66E-22
SGTA	small glutamine-rich tetratricopeptide repeat (TPR)-containing, alpha	6449	yellow	-0.116986701	1.76E-05	-0.048563611	0.075550207	0.155204943	1.12E-08	-0.047287979	0.083562968	0.400547096	8.43E-53	0.161615449	2.69E-09	0.265428688	4.83E-23	0.03956935	0.147703419	0.261991757	1.80E-22	0.166434198	8.81E-10	0.352304994	1.93E-40	0.229651745	1.70E-17	0.122466431	6.93E-06	0.099218085	0.000275225	0.155481719	1.06E-08	0.030089345	0.271039359	-0.181416087	2.23E-11	-0.240386203	4.56E-19	0.133752082	8.94E-07
LPIN1	lipin 1	23175	yellow	-0.034222039	0.210595398	-0.398981841	2.29E-52	0.152239698	2.14E-08	0.061184583	0.025108336	0.493470436	3.65E-83	0.475445828	1.62E-76	0.230733088	1.19E-17	0.381471246	1.16E-47	0.127206764	2.99E-06	0.244975062	9.19E-20	0.327016159	9.13E-35	0.159217768	4.62E-09	-0.220491213	3.23E-16	-0.118838117	1.29E-05	-0.243755678	1.41E-19	-0.320188875	2.53E-33	-0.095044699	0.000494257	-0.136195805	5.61E-07	-0.035503934	0.19399405
UQCRB	ubiquinol-cytochrome c reductase binding protein	7381	yellow	0.106804205	8.96E-05	-0.200130711	1.42E-13	0.15146528	2.52E-08	-0.047959474	0.079263326	0.588134849	1.71E-125	0.340185233	1.18E-37	0.222360614	1.79E-16	0.287063591	7.77E-27	-0.024173891	0.376581193	-0.228789614	2.25E-17	-0.104799668	0.000121388	0.304320357	4.13E-30	0.054719724	0.045209284	0.046675874	0.087644897	0.023508566	0.389860404	0.017443906	0.523470809	0.175353111	1.03E-10	-0.032817356	0.229939496	-0.180034024	3.17E-11
C15orf21	Dresden prostate cancer 2	283651	yellow	-0.355361834	3.66E-41	-0.655183541	3.77E-165	0.150767833	2.93E-08	-0.077948257	0.004302916	0.728264873	7.60E-222	0.695187087	4.58E-194	0.452094694	1.78E-68	0.367206818	4.89E-44	0.240870129	3.86E-19	0.293740875	4.47E-28	0.508173716	6.88E-89	0.246594797	5.18E-20	-0.168301695	5.67E-10	-0.249013232	2.18E-20	-0.124274406	5.05E-06	-0.201377811	9.98E-14	0.070457637	0.00988081	-0.012734895	0.641389067	0.029732934	0.27675901
BTD	biotinidase	686	yellow	-0.088367649	0.001203267	-0.265299632	5.08E-23	0.150432231	3.15E-08	-0.20034593	1.34E-13	0.396531608	1.09E-51	0.478704897	1.09E-77	0.372021393	3.06E-45	0.049390775	0.070697586	0.253402886	4.44E-21	0.281328212	8.50E-26	0.458593961	1.19E-70	0.263200184	1.14E-22	-0.163253887	1.85E-09	-0.094844952	0.000508015	-0.002422577	0.929401205	-0.077102397	0.004743109	-0.029484912	0.280787393	-0.058405243	0.032531945	0.11847956	1.37E-05
RPS27A	ribosomal protein S27a	6233	yellow	-0.257963555	8.22E-22	-0.421634078	6.93E-59	0.150144988	3.34E-08	-0.019202238	0.482475821	0.74102124	1.10E-233	0.386348819	6.05E-49	0.249252999	2.00E-20	0.203907502	4.82E-14	0.103135267	0.000155613	-0.105903957	0.000102739	0.117988541	1.49E-05	0.386562126	5.32E-49	0.092137134	0.000733316	-0.043565767	0.110927646	0.117646535	1.58E-05	0.03274657	0.230946665	0.21452401	2.05E-15	0.096734909	0.000390987	-0.054818824	0.044820576
CCT6B	chaperonin containing TCP1, subunit 6B (zeta 2)	10693	yellow	-0.082735759	0.002437474	-0.264446258	7.05E-23	0.149084315	4.18E-08	-0.059088877	0.030550457	0.434755177	6.76E-63	0.3851672	1.24E-48	0.274083447	1.61E-24	0.174036763	1.42E-10	0.348379325	1.59E-39	0.158514031	5.41E-09	0.344774861	1.07E-38	0.155387578	1.08E-08	-0.057241186	0.036159089	-0.074133814	0.006628636	-0.073708955	0.006947607	-0.113761471	2.99E-05	-0.026608741	0.330402645	-0.094631331	0.000523121	0.258562513	6.57E-22
IER3	immediate early response 3	8870	yellow	-0.171011811	2.96E-10	-0.383738051	2.96E-48	0.148988383	4.27E-08	0.23455053	3.33E-18	0.468269087	5.60E-74	0.214225625	2.25E-15	0.160511394	3.45E-09	0.279105073	2.12E-25	0.218315432	6.38E-16	-0.000459386	0.986595691	0.23736423	1.29E-18	0.055596663	0.041866303	-0.013742003	0.615249609	-0.174402637	1.30E-10	0.201396505	9.93E-14	0.066285876	0.015229863	0.171134718	2.88E-10	-0.02395688	0.38088156	-0.000611683	0.982152509
FCGR1B	Fc fragment of IgG, high affinity Ib, receptor (CD64)	2210	yellow	-0.171414455	2.69E-10	-0.283393096	3.62E-26	0.148298486	4.93E-08	0.130388565	1.68E-06	0.635752269	1.22E-152	0.226285441	5.09E-17	0.273964247	1.69E-24	0.292093966	9.10E-28	0.511157279	4.38E-90	-0.057920736	0.034001972	0.193118714	1.00E-12	0.301579883	1.42E-29	0.180802787	2.61E-11	0.070716128	0.00961261	0.086708041	0.001487771	0.116959642	1.77E-05	0.075891637	0.005444155	-0.047192322	0.084190546	0.310431639	2.52E-31
KRTCAP2	keratinocyte associated protein 2	200185	yellow	-0.024866299	0.363061375	-0.394784629	3.26E-51	0.147516142	5.81E-08	-0.037958948	0.164915056	0.702039066	1.67E-199	0.524611257	1.25E-95	0.534269122	9.13E-100	0.448083248	3.72E-67	0.175763576	9.26E-11	0.188880435	3.16E-12	0.385649076	9.27E-49	0.352481353	1.75E-40	-0.145129507	9.51E-08	-0.015883945	0.561279629	-0.00339706	0.901127534	-0.154538711	1.30E-08	-0.211145574	5.71E-15	-0.369034045	1.72E-44	-0.025494287	0.351065393
CBR3	carbonyl reductase 3	874	yellow	-0.031661761	0.246774477	-0.250144163	1.45E-20	0.145895563	8.12E-08	0.124524679	4.83E-06	0.326202073	1.36E-34	0.206976159	1.97E-14	0.095009824	0.000496634	0.306266051	1.71E-30	0.186628527	5.74E-12	0.056365963	0.039108097	0.274590121	1.32E-24	-0.043543642	0.111109241	-0.122577793	6.80E-06	-0.212197725	4.16E-15	-0.080331893	0.00325424	-0.1557543	9.97E-09	0.03668058	0.179619281	-0.148938105	4.31E-08	0.047270772	0.083675579
C19orf42	chromosome 19 open reading frame 42	79086	yellow	-0.100084742	0.000243024	-0.254444105	3.03E-21	0.145572154	8.68E-08	0.056501461	0.038638614	0.512758146	9.88E-91	0.391919396	1.96E-50	0.338017638	3.60E-37	0.409238367	2.95E-55	0.109179772	6.20E-05	-0.044721486	0.101762983	0.112123385	3.90E-05	0.094352959	0.000543435	0.017589165	0.520017744	0.025530939	0.350373105	-0.211232505	5.56E-15	-0.207307192	1.79E-14	-0.065646622	0.016242916	-0.199816676	1.56E-13	-0.030691228	0.261565175
PSME2	proteasome (prosome, macropain) activator subunit 2 (PA28 beta)	5721	yellow	-0.278107562	3.18E-25	-0.184668162	9.60E-12	0.143130899	1.43E-07	0.234914037	2.95E-18	0.407760038	7.82E-55	0.166885313	7.92E-10	0.015321767	0.575221484	0.338940479	2.24E-37	0.090624857	0.000896459	0.037313061	0.172226978	0.078741293	0.003924174	0.065166806	0.0170417	0.10714504	8.50E-05	0.034612233	0.20543693	-0.143190009	1.41E-07	-0.183240996	1.39E-11	-0.137961599	3.98E-07	-0.210931303	6.09E-15	0.025022908	0.360046078
MAD2L2	MAD2 mitotic arrest deficient-like 2 (yeast)	10459	yellow	-0.348881298	1.22E-39	-0.414926447	6.67E-57	0.142939722	1.48E-07	0.112186101	3.86E-05	0.566598013	1.23E-114	0.245923021	6.57E-20	0.193872784	8.17E-13	0.163557741	1.72E-09	0.355329837	3.72E-41	0.113285311	3.23E-05	0.400345581	9.59E-53	0.299720865	3.24E-29	-0.005358189	0.844641241	-0.078548437	0.004013387	-0.045464067	0.096199357	-0.054878602	0.044587472	-0.196061004	4.46E-13	-0.25121837	9.85E-21	0.216197756	1.23E-15
ISOC1	isochorismatase domain containing 1	51015	yellow	-0.412835542	2.71E-56	-0.45298028	9.06E-69	0.141164046	2.12E-07	0.160214313	3.69E-09	0.585280492	5.24E-124	0.441337071	5.62E-65	0.368805173	1.96E-44	0.396550068	1.07E-51	0.108869465	6.51E-05	-0.097618539	0.000345386	0.113185597	3.28E-05	0.220991619	2.76E-16	-0.054097544	0.047715098	-0.017566723	0.52055046	-0.160672707	3.33E-09	-0.140237701	2.55E-07	-0.077522959	0.004519396	-0.225594039	6.36E-17	-0.043790632	0.109095259
SH3GL3	SH3-domain GRB2-like 3	6457	yellow	-0.220187253	3.55E-16	-0.291131036	1.38E-27	0.140463512	2.44E-07	-0.063442583	0.020203207	0.478347766	1.47E-77	0.413891496	1.34E-56	0.378732797	5.94E-47	0.013538855	0.620484622	0.204016257	4.67E-14	0.06148554	0.024400136	0.29211811	9.01E-28	0.225522612	6.51E-17	-0.019147395	0.483727586	-0.053298482	0.051103396	-0.07121199	0.009116208	-0.126557426	3.37E-06	-0.011563417	0.67236116	-0.037805117	0.166634988	0.045671102	0.094692318
PNMT	phenylethanolamine N-methyltransferase	5409	yellow	-0.482997296	2.97E-79	-0.473773336	6.41E-76	0.140074518	2.63E-07	0.433587607	1.56E-62	0.519824266	1.25E-93	0.107839604	7.64E-05	0.026491143	0.332545128	0.445808842	2.04E-66	0.088215512	0.001227087	-0.206646734	2.17E-14	0.070456713	0.00988178	0.14003622	2.65E-07	-0.038872188	0.154978281	-0.104666263	0.000123846	-0.005610786	0.837417101	-0.057486222	0.035368196	-0.061484047	0.024403605	-0.237597097	1.19E-18	-0.081869696	0.002707234
NQO1	NAD(P)H dehydrogenase, quinone 1	1728	yellow	-0.204342042	4.25E-14	-0.491581661	1.90E-82	0.138789793	3.39E-07	0.234182725	3.77E-18	0.586539069	1.16E-124	0.269562795	9.67E-24	0.27706869	4.85E-25	0.511454286	3.32E-90	0.292869191	6.52E-28	-0.030283056	0.267964885	0.359329019	4.11E-42	0.067486045	0.013477098	-0.044251186	0.105416968	-0.162959905	1.97E-09	-0.00859052	0.753386616	-0.04603759	0.092070991	-0.004761183	0.861766233	-0.240242699	4.79E-19	0.036418179	0.182754376
C6orf52	chromosome 6 open reading frame 52	347744	yellow	-0.249481408	1.84E-20	-0.30191089	1.22E-29	0.13787296	4.05E-07	0.042684827	0.11834104	0.475463948	1.60E-76	0.274927195	1.15E-24	0.182774193	1.57E-11	0.212106639	4.28E-15	0.272808159	2.68E-24	-0.00162847	0.952509103	0.169921463	3.85E-10	0.207866066	1.52E-14	0.037380837	0.171448511	-0.041013054	0.133470812	-0.063321621	0.020443057	-0.067395352	0.013603039	-0.03227597	0.237722126	-0.111715331	4.16E-05	0.234502395	3.39E-18
PPP1R12A	protein phosphatase 1, regulatory (inhibitor) subunit 12A	4659	yellow	0.235305337	2.58E-18	0.528539751	2.70E-97	0.137056728	4.75E-07	0.214261291	2.22E-15	-0.483387209	2.14E-79	-0.18660445	5.78E-12	-0.390226955	5.59E-50	-0.322330789	9.02E-34	-0.145554623	8.71E-08	-0.100896357	0.000216101	-0.206910741	2.01E-14	-0.249985747	1.54E-20	-0.122584402	6.79E-06	0.023405137	0.391949998	-0.052864231	0.053027671	-0.106034898	0.000100716	0.194052275	7.78E-13	0.110884224	4.75E-05	-0.118277041	1.42E-05
NUDT1	nudix (nucleoside diphosphate linked moiety X)-type motif 1	4521	yellow	-0.215429398	1.56E-15	-0.536416865	1.05E-100	0.136114117	5.70E-07	0.155739565	1.00E-08	0.729381426	7.44E-223	0.509209833	2.65E-89	0.476368963	7.57E-77	0.334220559	2.50E-36	0.191331556	1.63E-12	0.085801234	0.001668216	0.338389906	2.97E-37	0.302478272	9.47E-30	-0.067611705	0.013304302	-0.077242188	0.004667662	0.073630147	0.007008266	-0.106263132	9.73E-05	0.009223632	0.735866307	-0.123283984	6.01E-06	-0.060620826	0.02648287
LOC644246	hypothetical protein LOC644246	644246	yellow	-0.120032297	1.05E-05	-0.320528028	2.15E-33	0.135994376	5.83E-07	-0.083308932	0.002272704	0.621956171	2.73E-144	0.449644276	1.15E-67	0.310868944	2.06E-31	0.423822193	1.53E-59	0.21062982	6.66E-15	0.223333633	1.31E-16	0.329854039	2.24E-35	0.249539963	1.81E-20	0.007476352	0.784524364	-0.028191729	0.302433628	-0.162083434	2.41E-09	-0.187319504	4.78E-12	-0.121593293	8.06E-06	-0.204437328	4.14E-14	0.10313504	0.000155618
LOC400236	hypothetical LOC400236	400236	yellow	-0.193831726	8.26E-13	-0.330949258	1.30E-35	0.134747969	7.40E-07	0.109619797	5.79E-05	0.546945554	2.11E-105	0.254939665	2.53E-21	0.187762754	4.25E-12	0.412435765	3.54E-56	0.157854281	6.27E-09	-0.026537735	0.331695219	0.176542154	7.63E-11	0.207676311	1.60E-14	-0.004010337	0.883395647	-0.017425554	0.52390789	-0.050357256	0.065354248	-0.074414172	0.00642542	-0.118625731	1.34E-05	-0.262515576	1.48E-22	0.047031838	0.085251977
PPAPDC1A	phosphatidic acid phosphatase type 2 domain containing 1A	196051	yellow	-0.270761355	6.03E-24	-0.432610658	3.14E-62	0.134057256	8.44E-07	0.17507036	1.10E-10	0.56893881	8.91E-116	0.32233857	8.98E-34	0.305470574	2.45E-30	0.3634161	4.19E-43	0.072349396	0.008062917	-0.04916542	0.071993632	0.230534387	1.27E-17	0.134753985	7.39E-07	-0.041091315	0.132730685	-0.088928597	0.001119077	0.055632957	0.041732575	-0.101348612	0.000202339	0.03583018	0.189926425	-0.132280526	1.18E-06	-0.138225064	3.78E-07
TRMT61A	tRNA methyltransferase 61 homolog A (S. cerevisiae)	115708	yellow	-0.163795963	1.63E-09	-0.407079504	1.22E-54	0.134015424	8.50E-07	0.243107698	1.77E-19	0.42960835	2.66E-61	0.286538307	9.70E-27	0.256598392	1.37E-21	0.306686942	1.41E-30	0.199152608	1.88E-13	0.228582367	2.41E-17	0.487420067	6.89E-81	0.051226002	0.060839456	-0.160162576	3.73E-09	-0.146096687	7.79E-08	0.024972276	0.361019203	-0.193454087	9.16E-13	-0.135564111	6.33E-07	-0.28752572	6.39E-27	-0.047817168	0.080159191
HLA-DMB	major histocompatibility complex, class II, DM beta	3109	yellow	-0.172730047	1.95E-10	-0.372002835	3.09E-45	0.133083551	1.01E-06	0.08766722	0.001316591	0.64817475	1.56E-160	0.364439207	2.35E-43	0.324018305	3.97E-34	0.328219562	5.04E-35	0.461756948	9.98E-72	0.055787255	0.041168077	0.240033187	5.15E-19	0.286128787	1.15E-26	0.094432203	0.000537579	0.014001124	0.608600556	0.069605243	0.010813024	0.063064131	0.020961895	0.099442431	0.000266527	-0.014681635	0.591292855	0.251104816	1.03E-20
IK	IK cytokine, down-regulator of HLA II	3550	yellow	-0.052317968	0.055533821	-0.098003691	0.000327109	0.131518662	1.36E-06	-0.036530332	0.181409474	0.336421338	8.15E-37	0.284074449	2.72E-26	0.118640336	1.34E-05	0.020328796	0.457155746	0.063370298	0.02034624	0.172282005	2.18E-10	0.227598347	3.32E-17	0.31729438	1.01E-32	-0.101654314	0.000193507	0.060117153	0.027765354	-0.076065036	0.005338333	-0.24584451	6.76E-20	-0.147344577	6.02E-08	-0.18218953	1.83E-11	0.054308552	0.046852508
BLM	Bloom syndrome, RecQ helicase-like	641	yellow	-0.031257863	0.252857098	-0.162071883	2.42E-09	0.12992952	1.82E-06	-0.085085422	0.001824628	0.350687023	4.62E-40	0.298010344	6.91E-29	0.14112982	2.13E-07	0.208368631	1.31E-14	0.175065716	1.10E-10	0.192950936	1.05E-12	0.233327186	5.02E-18	0.043555698	0.111010262	0.012435515	0.649247826	-0.079819474	0.003457739	-0.124204158	5.11E-06	-0.072492697	0.007938245	0.001007938	0.970594909	-0.039821152	0.145140951	0.069199781	0.011283257
HNRNPC	heterogeneous nuclear ribonucleoprotein C (C1/C2)	3183	yellow	-0.293382141	5.22E-28	-0.387202158	3.59E-49	0.129828131	1.86E-06	0.001114956	0.967474453	0.546859059	2.30E-105	0.444141449	7.08E-66	0.387563785	2.88E-49	0.278588239	2.61E-25	0.12546477	4.09E-06	0.14730331	6.07E-08	0.306023329	1.91E-30	0.214982198	1.78E-15	-0.100257294	0.00023705	-0.038231106	0.161904898	-0.151664794	2.42E-08	-0.234459932	3.43E-18	-0.282572517	5.08E-26	-0.375444515	4.15E-46	0.029167399	0.286002238
HBG1	hemoglobin, gamma A	3047	yellow	-0.221321326	2.49E-16	-0.149968119	3.47E-08	0.128425722	2.40E-06	0.220579492	3.14E-16	0.293954759	4.07E-28	0.065413751	0.016626394	0.069289887	0.011177217	0.135145797	6.86E-07	0.250315217	1.37E-20	-0.152330093	2.10E-08	0.01836206	0.501844058	0.053014896	0.052353294	0.102606326	0.000168266	-0.018996573	0.4871791	0.076480973	0.005092021	0.104758453	0.000122143	0.121718883	7.89E-06	-0.044721711	0.101761259	0.163126266	1.90E-09
DHRS12	dehydrogenase/reductase (SDR family) member 12	79758	yellow	-0.268922285	1.24E-23	-0.355559503	3.28E-41	0.128211548	2.50E-06	0.050425447	0.064990164	0.451405691	3.01E-68	0.283129165	4.04E-26	0.212442141	3.86E-15	0.217551518	8.09E-16	0.408549074	4.65E-55	0.056378633	0.039063992	0.316642639	1.38E-32	0.136199624	5.60E-07	0.001087375	0.968278638	-0.100054114	0.0002441	-0.053029729	0.052287295	-0.064881299	0.017533169	-0.032193822	0.238919083	-0.118225232	1.43E-05	0.332382792	6.31E-36
FAM113B	family with sequence similarity 113, member B	91523	yellow	-0.353334166	1.10E-40	-0.330316029	1.78E-35	0.127870917	2.66E-06	0.194111769	7.65E-13	0.381568662	1.09E-47	0.022080204	0.419313778	0.054461934	0.046233749	0.272377739	3.18E-24	0.117848366	1.53E-05	-0.213002286	3.26E-15	0.084348109	0.001999715	0.059528384	0.029331999	0.029855412	0.274784294	-0.116817635	1.81E-05	0.151685636	2.41E-08	0.140903048	2.23E-07	0.017141364	0.530700246	-0.152836043	1.88E-08	-0.018457361	0.499626651
RPL31P11	ribosomal protein L31 pseudogene 11	641311	yellow	-0.183342304	1.36E-11	-0.200271866	1.37E-13	0.126113089	3.64E-06	0.186885902	5.36E-12	0.663618101	7.12E-171	0.171789636	2.46E-10	0.164162378	1.50E-09	0.289204468	3.14E-27	0.077580015	0.004489793	-0.22094312	2.80E-16	-0.074738855	0.006197083	0.336078164	9.71E-37	0.237554197	1.20E-18	0.150670685	2.99E-08	0.018101171	0.507940757	0.025770913	0.345861757	0.002644581	0.922950825	-0.093530214	0.000607845	-0.059865764	0.028425228
MTHFS	5,10-methenyltetrahydrofolate synthetase (5-formyltetrahydrofolate cyclo-ligase)	10588	yellow	-0.274153459	1.57E-24	-0.422371926	4.17E-59	0.125728751	3.90E-06	0.106234761	9.77E-05	0.61106313	5.49E-138	0.341456682	6.09E-38	0.163647496	1.69E-09	0.277043899	4.90E-25	0.144610708	1.06E-07	0.162996936	1.96E-09	0.282074676	6.25E-26	0.415362009	4.97E-57	-0.063521414	0.020048221	0.036479175	0.182022024	-0.122344603	7.08E-06	-0.212416159	3.89E-15	-0.144456749	1.09E-07	-0.145869421	8.17E-08	0.047239931	0.083877719
CSF1R	colony stimulating factor 1 receptor	1436	yellow	-0.169851174	3.92E-10	-0.35114468	3.61E-40	0.123056676	6.25E-06	0.072541509	0.007896173	0.713818796	3.16E-209	0.27165817	4.23E-24	0.32056985	2.11E-33	0.38247169	6.35E-48	0.234258948	3.67E-18	-0.098894714	0.000288232	0.109280591	6.11E-05	0.305103925	2.90E-30	0.159568474	4.27E-09	0.04247035	0.120203426	0.092768154	0.000673768	0.084500441	0.001962327	0.050635886	0.063877099	-0.099977475	0.000246809	0.026043643	0.340779728
CMTM7	CKLF-like MARVEL transmembrane domain containing 7	112616	yellow	-0.086128914	0.00160081	-0.367299875	4.63E-44	0.121816319	7.76E-06	-0.156046882	9.35E-09	0.639480123	5.71E-155	0.395252407	2.43E-51	0.304563826	3.70E-30	0.256872434	1.23E-21	0.32709037	8.81E-35	0.220563291	3.16E-16	0.346913756	3.46E-39	0.336194165	9.16E-37	0.050499365	0.064597383	-0.032090375	0.240432408	-0.021934334	0.42239352	-0.007396079	0.786781796	-0.008710727	0.750049993	-0.034970444	0.20078261	0.193179987	9.88E-13
CARD17	caspase recruitment domain family, member 17	440068	yellow	-0.120723453	9.37E-06	-0.169931453	3.84E-10	0.119844315	1.09E-05	-0.024323908	0.373625974	0.276662768	5.71E-25	0.125159499	4.32E-06	0.008520706	0.755326576	0.037839161	0.166253201	0.312960943	7.78E-32	-0.040444535	0.138943483	0.117941185	1.50E-05	0.10944877	5.95E-05	0.060424906	0.026975526	-0.120393124	9.91E-06	0.065342919	0.0167446	0.158243737	5.75E-09	0.148098073	5.14E-08	0.04421326	0.105716111	0.268428602	1.51E-23
WDR6	WD repeat domain 6	11180	yellow	-0.400750415	7.40E-53	-0.381042408	1.50E-47	0.119512669	1.15E-05	0.12662147	3.33E-06	0.45184276	2.16E-68	0.26974022	9.02E-24	0.150392009	3.17E-08	0.265679783	4.39E-23	0.140782533	2.29E-07	0.297289847	9.49E-29	0.428892248	4.40E-61	0.177036948	6.75E-11	-0.065103472	0.017149668	-0.057694298	0.03470822	-0.130606557	1.61E-06	-0.228009038	2.91E-17	-0.2375601	1.20E-18	-0.225272044	7.05E-17	0.037474255	0.170379838
C1QA	complement component 1, q subcomponent, A chain	712	yellow	-0.159662616	4.18E-09	-0.35571235	3.02E-41	0.119197429	1.22E-05	0.100053395	0.000244125	0.683466022	4.13E-185	0.275549484	8.95E-25	0.31783347	7.82E-33	0.366848996	5.99E-44	0.525021917	8.39E-96	0.027011094	0.323139956	0.265629187	4.47E-23	0.323220515	5.85E-34	0.174140307	1.38E-10	0.045139646	0.098599356	0.082676671	0.002455067	0.12520319	4.29E-06	0.059149381	0.030380183	-0.050991107	0.062033951	0.314980806	3.02E-32
APH1A	anterior pharynx defective 1 homolog A (C. elegans)	51107	yellow	-0.021655811	0.428310569	-0.262068399	1.75E-22	0.117541303	1.61E-05	-0.001401946	0.959108953	0.383131711	4.26E-48	0.350355039	5.52E-40	0.308641185	5.76E-31	0.371387646	4.42E-45	0.257107051	1.13E-21	0.258582396	6.52E-22	0.391452997	2.61E-50	0.013944055	0.6100622	-0.032148166	0.239586161	-0.092787344	0.000672029	-0.122104345	7.38E-06	-0.190843826	1.86E-12	-0.122395029	7.02E-06	-0.229699196	1.67E-17	0.12095663	9.00E-06
CCR1	chemokine (C-C motif) receptor 1	1230	yellow	-0.17305161	1.81E-10	-0.272519021	3.01E-24	0.117381967	1.65E-05	0.096619231	0.000397357	0.566823384	9.59E-115	0.220547052	3.17E-16	0.210471103	6.99E-15	0.26023878	3.50E-22	0.355197669	4.00E-41	-0.114386639	2.70E-05	0.061202276	0.025066216	0.261226851	2.41E-22	0.158763499	5.12E-09	0.043078378	0.114982573	0.047228457	0.083953028	0.091899544	0.000756976	0.0444168	0.104118552	-0.058965156	0.030901185	0.241981242	2.62E-19
LOC100287566	hypothetical protein LOC100287566	100287566	yellow	-0.111082112	4.60E-05	-0.422088207	5.07E-59	0.116929932	1.78E-05	0.068866965	0.011682701	0.448816798	2.14E-67	0.390849304	3.80E-50	0.231221788	1.01E-17	0.195920685	4.64E-13	0.25949874	4.63E-22	0.240038244	5.14E-19	0.375790891	3.38E-46	0.126159389	3.61E-06	-0.137623526	4.25E-07	-0.162593047	2.15E-09	-0.025756966	0.34612293	-0.091394206	0.000809672	0.013007173	0.634276385	-0.041793851	0.126228123	0.140045452	2.65E-07
ZNF223	zinc finger protein 223	7766	yellow	0.358041695	8.38E-42	0.277227705	4.54E-25	0.115315264	2.32E-05	-0.019989513	0.464701893	-0.298098271	6.65E-29	0.056933574	0.037173232	-0.171375991	2.71E-10	-0.230338346	1.35E-17	0.134247348	8.14E-07	0.225901588	5.76E-17	0.082407693	0.002536628	-0.242550992	2.15E-19	-0.117267355	1.68E-05	-0.104207175	0.000132665	-0.132261867	1.18E-06	-0.095715897	0.000450531	0.129581996	1.94E-06	0.088661124	0.001158518	0.186717784	5.61E-12
NT5C	5', 3'-nucleotidase, cytosolic	30833	yellow	0.007920955	0.772054536	-0.413376825	1.89E-56	0.114083453	2.84E-05	-0.274816821	1.20E-24	0.674764015	9.88E-179	0.547961887	7.26E-106	0.512191424	1.68E-90	0.409217225	3.00E-55	0.286051607	1.19E-26	0.446335012	1.38E-66	0.629329798	1.06E-148	0.320631875	2.05E-33	-0.095138399	0.000487924	-0.066330285	0.015161596	-0.088389646	0.001199858	-0.214872841	1.84E-15	-0.170274964	3.54E-10	-0.181052731	2.44E-11	0.081972591	0.002673816
CCDC77	coiled-coil domain containing 77	84318	yellow	-0.246206444	5.94E-20	-0.408818659	3.90E-55	0.114016299	2.87E-05	0.115896604	2.11E-05	0.473688476	6.87E-76	0.522804101	7.18E-95	0.428177532	7.29E-61	0.214177529	2.28E-15	0.132687328	1.09E-06	0.270301263	7.23E-24	0.382604584	5.86E-48	0.141207631	2.10E-07	-0.109924285	5.52E-05	-0.068219813	0.012495435	-0.076164055	0.00527874	-0.193213637	9.78E-13	-0.041087375	0.132767875	-0.103010776	0.000158508	-0.030969362	0.257265267
RPL32	ribosomal protein L32	6161	yellow	-0.291817368	1.03E-27	-0.405503529	3.42E-54	0.113080066	3.34E-05	0.062425216	0.022299079	0.784405567	7.88E-280	0.342269917	3.99E-38	0.30954524	3.80E-31	0.306530028	1.52E-30	0.177731661	5.67E-11	-0.149665487	3.70E-08	0.067024245	0.014129259	0.430431811	1.48E-61	0.155331494	1.09E-08	0.036721838	0.179129992	0.110478313	5.06E-05	0.124384084	4.95E-06	0.126794646	3.23E-06	-0.010260103	0.707481383	0.001943383	0.943339523
RNASE6	ribonuclease, RNase A family, k6	6039	yellow	-0.211119933	5.75E-15	-0.298164464	6.46E-29	0.113000501	3.38E-05	0.09372573	0.000591926	0.553187541	2.87E-108	0.202751177	6.73E-14	0.202495136	7.25E-14	0.206986215	1.97E-14	0.348017415	1.93E-39	-0.125994403	3.72E-06	0.06595718	0.015743601	0.235393762	2.51E-18	0.156614511	8.25E-09	0.013781449	0.61423539	0.049967963	0.06746509	0.071378025	0.008955175	0.069050981	0.011460325	-0.019862465	0.467545353	0.235861362	2.14E-18
RILPL1	Rab interacting lysosomal protein-like 1	353116	yellow	-0.18414443	1.10E-11	-0.121264348	8.54E-06	0.111212316	4.51E-05	0.053751485	0.049158618	0.436082845	2.59E-63	0.143849504	1.23E-07	0.331665898	9.05E-36	0.186201611	6.42E-12	0.233059231	5.49E-18	0.001061314	0.969038509	0.20478854	3.74E-14	0.163686589	1.67E-09	0.18613283	6.54E-12	0.131792223	1.29E-06	0.058893137	0.031106934	0.052749127	0.053547747	-0.129785221	1.87E-06	-0.199645993	1.63E-13	0.057002441	0.036944111
MARCH8	membrane-associated ring finger (C3HC4) 8	220972	yellow	-0.245148838	8.64E-20	-0.379792236	3.16E-47	0.110422573	5.11E-05	-0.098110337	0.00032221	0.477105547	4.11E-77	0.402359604	2.63E-53	0.342299277	3.93E-38	0.220945895	2.80E-16	0.224588349	8.79E-17	0.151815863	2.34E-08	0.433596709	1.55E-62	0.213071526	3.19E-15	-0.076831816	0.004892285	-0.087631681	0.001322595	-0.071684219	0.008664849	-0.146342983	7.41E-08	-0.020259368	0.458694304	-0.060481442	0.026832556	0.052103143	0.056546044
EEF1A1	eukaryotic translation elongation factor 1 alpha 1	1915	yellow	-0.297394675	9.06E-29	-0.644539308	3.48E-158	0.11011569	5.36E-05	0.014060806	0.607073655	0.83057712	0	0.577648442	4.18E-120	0.488109137	3.81E-81	0.45971454	4.96E-71	0.231990038	7.84E-18	0.231091148	1.06E-17	0.489799895	8.88E-82	0.343297674	2.33E-38	-0.078945098	0.003831854	-0.110509416	5.04E-05	-0.116387891	1.95E-05	-0.256915382	1.22E-21	-0.106048553	0.000100507	-0.152191318	2.16E-08	0.004598357	0.866448516
SEC61B	Sec61 beta subunit	10952	yellow	-0.242904999	1.90E-19	-0.241852438	2.74E-19	0.10988769	5.55E-05	0.286805023	8.67E-27	0.420249554	1.79E-58	0.354192476	6.92E-41	0.100347151	0.000233994	0.222845582	1.53E-16	-0.028735395	0.293201845	-0.018384215	0.501328098	-0.038448937	0.159525611	0.305901934	2.02E-30	-0.073698052	0.006955971	0.104058385	0.000135648	-0.12819455	2.50E-06	-0.242956428	1.87E-19	-0.091658392	0.000781713	-0.126540121	3.38E-06	-0.05987725	0.028394787
FBP1	fructose-1,6-bisphosphatase 1	2203	yellow	-0.13996635	2.69E-07	-0.11145451	4.34E-05	0.108416854	6.99E-05	0.066473173	0.01494377	0.287304299	7.02E-27	0.091720156	0.000775307	0.098427791	0.00030803	0.082852822	0.00240296	0.372261865	2.66E-45	-0.091708766	0.000776485	0.032992667	0.227458576	0.108190562	7.24E-05	0.126432125	3.44E-06	0.029366582	0.282723265	-0.014029223	0.60788147	0.068392494	0.012273819	-0.009205078	0.736377871	-0.080951154	0.003022885	0.370880869	5.92E-45
ALG9	asparagine-linked glycosylation 9, alpha-1,2-mannosyltransferase homolog (S. cerevisiae)	79796	yellow	-0.16877576	5.06E-10	-0.422156095	4.84E-59	0.107881523	7.59E-05	0.246967814	4.53E-20	0.434510637	8.05E-63	0.389543804	8.52E-50	0.24825932	2.86E-20	0.283173548	3.96E-26	0.072239809	0.008159436	0.112658343	3.58E-05	0.234052223	3.94E-18	0.213991839	2.41E-15	-0.270118683	7.77E-24	-0.121545137	8.13E-06	-0.070869064	0.009457	-0.216552417	1.10E-15	-0.115356336	2.31E-05	-0.234644518	3.23E-18	-0.082142065	0.002619595
LQK1	hypothetical LOC642946	642946	yellow	-0.030340909	0.267051321	-0.17223837	2.20E-10	0.10785651	7.62E-05	-0.171780131	2.46E-10	0.368833828	1.93E-44	0.288452315	4.32E-27	0.311023872	1.92E-31	0.178644343	4.51E-11	0.230271799	1.38E-17	0.123956281	5.34E-06	0.269899242	8.47E-24	0.161430361	2.80E-09	0.034373323	0.208584384	0.024198507	0.376095284	0.039226507	0.15124772	-0.035009372	0.20028148	-0.008547107	0.754592789	-0.073615247	0.007019788	0.145027778	9.71E-08
LYPLAL1	lysophospholipase-like 1	127018	yellow	-0.279769215	1.61E-25	-0.351487667	3.00E-40	0.106377003	9.56E-05	-0.017888927	0.5129292	0.591751135	2.13E-127	0.532084249	8.09E-99	0.351175138	3.55E-40	0.357547277	1.10E-41	-0.053501411	0.050224391	-0.020410826	0.455341646	0.085942675	0.001638807	0.407109403	1.20E-54	-0.086766939	0.001476696	0.085731054	0.001682987	-0.264650418	6.52E-23	-0.360689722	1.93E-42	-0.147935216	5.32E-08	-0.173598586	1.58E-10	-0.085243299	0.001789016
FTHL20	ferritin, heavy polypeptide-like 20	729009	yellow	-0.159997071	3.88E-09	-0.28880671	3.71E-27	0.106330144	9.63E-05	-0.000106848	0.99688216	0.576100192	2.51E-119	0.341627743	5.57E-38	0.425251082	5.66E-60	0.356873558	1.60E-41	0.116418433	1.94E-05	-0.175188876	1.07E-10	-0.024846872	0.363436514	0.141958102	1.81E-07	0.221047062	2.71E-16	0.049167581	0.071981111	0.041546426	0.128489382	0.065074241	0.017199701	0.101452284	0.000199303	0.000750238	0.978110722	-0.063818508	0.01947339
CASP1	caspase 1, apoptosis-related cysteine peptidase (interleukin 1, beta, convertase)	834	yellow	-0.196034051	4.50E-13	-0.306384532	1.62E-30	0.106157838	9.89E-05	-0.079259758	0.003693186	0.514942124	1.28E-91	0.252181382	6.94E-21	0.179605852	3.53E-11	0.212845196	3.42E-15	0.312511834	9.60E-32	-0.055541132	0.042071613	0.129366049	2.02E-06	0.243090269	1.78E-19	0.11270776	3.55E-05	-0.043945756	0.107845175	-0.048225978	0.077607475	0.052930955	0.052728126	0.008683971	0.750792281	-0.063382648	0.02032174	0.261053118	2.57E-22
CEBPA	CCAAT/enhancer binding protein (C/EBP), alpha	1050	yellow	-0.435335564	4.45E-63	-0.396758404	9.40E-52	0.106083126	1.00E-04	0.462980272	3.80E-72	0.51205333	1.91E-90	0.079937477	0.003409877	0.055856673	0.040916226	0.292161269	8.84E-28	0.223692289	1.17E-16	-0.103581121	0.000145648	0.148146474	5.09E-08	0.215017129	1.77E-15	0.073858301	0.006833946	0.027980476	0.306072385	0.05348022	0.050315585	-0.046155672	0.091238912	-0.044815362	0.101045818	-0.161636827	2.67E-09	0.027598705	0.31272151
DNAJC15	DnaJ (Hsp40) homolog, subfamily C, member 15	29103	yellow	-0.028070339	0.304521009	-0.289538369	2.72E-27	0.10571399	0.000105742	-0.051756902	0.058209733	0.646527159	1.83E-159	0.45248992	1.32E-68	0.444219817	6.68E-66	0.477263297	3.61E-77	0.045486741	0.096033379	-0.008061219	0.768132559	0.113169329	3.29E-05	0.367119412	5.14E-44	-0.008684241	0.750784791	0.114772233	2.54E-05	-0.045591731	0.095267821	-0.188003749	3.99E-12	-0.113771089	2.99E-05	-0.231866883	8.17E-18	-0.093761679	0.000589041
DKFZp779M0652	hypothetical DKFZp779M0652	374387	yellow	-0.37288466	1.85E-45	-0.28100618	9.71E-26	0.105075125	0.000116459	0.437132437	1.21E-63	0.420218201	1.83E-58	-0.08775858	0.001301271	-0.05611234	0.039999877	0.389248854	1.02E-49	0.045777893	0.093922395	-0.353008897	1.32E-40	-0.121740623	7.86E-06	0.112358859	3.75E-05	0.163560867	1.72E-09	0.023168418	0.396757938	0.09659043	0.000398958	0.124044558	5.26E-06	0.044546363	0.10311165	-0.131871888	1.27E-06	-0.129871589	1.84E-06
C5orf43	chromosome 5 open reading frame 43	643155	yellow	-0.212429258	3.88E-15	-0.416799823	1.88E-57	0.104261039	0.000131601	0.042876658	0.116694531	0.460638476	2.40E-71	0.605626823	6.23E-135	0.337078525	5.83E-37	0.336101784	9.60E-37	0.035806784	0.190216018	0.038629286	0.157575798	0.081006319	0.003003021	0.123927579	5.37E-06	-0.13311821	1.01E-06	-0.121210022	8.62E-06	-0.201614022	9.33E-14	-0.235783151	2.20E-18	0.069028919	0.011486786	-0.032292791	0.237477559	-0.053310616	0.051050473
ZCRB1	zinc finger CCHC-type and RNA binding motif 1	85437	yellow	-0.209194073	1.02E-14	-0.412517092	3.35E-56	0.103966276	0.000137527	0.025519963	0.350580319	0.717518445	2.21E-212	0.531814723	1.06E-98	0.471445963	4.28E-75	0.475172445	2.03E-76	0.126689175	3.29E-06	0.037641674	0.168477114	0.136434987	5.35E-07	0.29508438	2.49E-28	0.076356945	0.005164372	0.077799731	0.004377426	-0.158201041	5.80E-09	-0.205150771	3.36E-14	-0.126431848	3.44E-06	-0.190156227	2.24E-12	-0.021207495	0.437935288
NACAP1	nascent-polypeptide-associated complex alpha polypeptide pseudogene 1	83955	yellow	-0.101091329	0.000210064	-0.227925866	2.99E-17	0.103912165	0.000138641	-0.087048652	0.001424767	0.504922765	1.34E-87	0.368775229	1.99E-44	0.174359218	1.31E-10	0.068844537	0.011710065	0.197623529	2.89E-13	0.041592177	0.1280689	0.08332032	0.002269536	0.400907846	6.69E-53	0.02636002	0.334944566	0.051140942	0.06126979	-0.190147094	2.25E-12	-0.142270265	1.70E-07	-0.029997	0.272513475	0.021289682	0.436161587	0.165489328	1.10E-09
RPS16	ribosomal protein S16	6217	yellow	-0.15203124	2.24E-08	-0.494281364	1.79E-83	0.10377374	0.000141532	-0.09698295	0.00037765	0.874147309	0	0.528546396	2.68E-97	0.471002226	6.14E-75	0.427433758	1.23E-60	0.204564702	3.99E-14	0.19499681	5.99E-13	0.401288721	5.24E-53	0.46577994	4.11E-73	0.011425014	0.67605862	0.00236875	0.930965872	-0.089216	0.001078082	-0.167908057	6.22E-10	-0.139918571	2.71E-07	-0.185319067	8.10E-12	0.016112306	0.555663351
SEPX1	selenoprotein X, 1	51734	yellow	0.069349779	0.011107224	-0.318263165	6.37E-33	0.102199488	0.000178649	-0.033783505	0.216503919	0.437881274	7.04E-64	0.34168264	5.41E-38	0.359092314	4.69E-42	0.49973516	1.44E-85	0.168144918	5.88E-10	0.325375714	2.05E-34	0.538387301	1.43E-101	0.045107477	0.098839908	-0.154110757	1.43E-08	-0.136014695	5.81E-07	0.039998512	0.143356552	-0.175202633	1.06E-10	-0.178630158	4.52E-11	-0.34769836	2.28E-39	-0.081637873	0.002783926
TMEM50A	transmembrane protein 50A	23585	yellow	-0.184845761	9.17E-12	-0.327420678	7.48E-35	0.101844865	0.000188187	0.014730598	0.590056307	0.395334636	2.31E-51	0.438669454	3.97E-64	0.342905846	2.86E-38	0.148055907	5.19E-08	0.242965784	1.86E-19	0.023959403	0.380831394	0.224274774	9.72E-17	0.235128192	2.74E-18	-0.130337935	1.69E-06	-0.089553291	0.001031742	0.008327047	0.760715934	-0.124682514	4.70E-06	-0.025544553	0.350116172	-0.081814155	0.002725431	0.155744496	9.99E-09
ZNF248	zinc finger protein 248	57209	yellow	0.169241737	4.53E-10	0.194948472	6.07E-13	0.100913463	0.000215565	0.066396992	0.015059559	-0.296317395	1.45E-28	-0.0015113	0.955922511	-0.232158891	7.41E-18	-0.231407718	9.51E-18	0.124816105	4.59E-06	0.165293072	1.15E-09	0.072902638	0.007591063	-0.217981616	7.08E-16	-0.156582688	8.31E-09	-0.115286211	2.33E-05	-0.266713613	2.94E-23	-0.171389083	2.71E-10	0.061247735	0.024958273	0.060859584	0.025893006	0.121228452	8.59E-06
INTS4	integrator complex subunit 4	92105	yellow	-0.2050843	3.43E-14	-0.366352968	7.95E-44	0.100216041	0.000238466	-0.181865946	1.98E-11	0.418105115	7.76E-58	0.467302983	1.22E-73	0.366456289	7.49E-44	0.152304348	2.11E-08	0.243747765	1.41E-19	0.287194837	7.35E-27	0.429134972	3.71E-61	0.186705539	5.63E-12	-0.07483399	0.006131576	-0.096825084	0.000386089	-0.044341873	0.104704405	-0.095439461	0.000468084	0.028206922	0.302173043	0.031615878	0.247460266	0.137553117	4.31E-07
HCLS1	hematopoietic cell-specific Lyn substrate 1	3059	yellow	-0.053399296	0.050665112	-0.202904167	6.44E-14	0.098638133	0.000298959	-0.068003045	0.012778634	0.54738049	1.34E-105	0.278279536	2.96E-25	0.344413434	1.30E-38	0.265587396	4.55E-23	0.211305518	5.44E-15	0.057582184	0.035062505	0.176947639	6.90E-11	0.212508573	3.79E-15	0.145454284	8.89E-08	0.063379017	0.020328941	0.02124267	0.437175663	0.007978653	0.770440527	0.003754518	0.890785654	-0.077289103	0.004642585	0.06404434	0.019046115
CEP250	centrosomal protein 250kDa	11190	yellow	-0.038428455	0.159748202	-0.233350379	4.98E-18	0.098637805	0.000298973	0.071211566	0.009116622	0.316376269	1.56E-32	0.194202583	7.46E-13	0.170652464	3.23E-10	0.252714964	5.71E-21	0.203269074	5.80E-14	0.320818199	1.87E-33	0.453018893	8.79E-69	0.004977808	0.855544451	-0.044485182	0.103586156	-0.107738306	7.76E-05	0.055993486	0.040423681	-0.030492201	0.264672414	-0.03999967	0.143344955	-0.124353398	4.98E-06	0.021198165	0.438136894
SURF6	surfeit 6	6838	yellow	-0.126944353	3.14E-06	-0.339379004	1.79E-37	0.097555008	0.000348492	-0.136970387	4.83E-07	0.462683383	4.81E-72	0.488722473	2.25E-81	0.375008542	5.35E-46	0.154466897	1.32E-08	0.134879288	7.22E-07	0.180002604	3.19E-11	0.29801402	6.90E-29	0.179971872	3.22E-11	-0.02453699	0.369453136	-0.071447059	0.008888971	0.000422637	0.987667893	-0.06697452	0.014201114	0.150737992	2.95E-08	0.108768707	6.62E-05	-0.0122256	0.654781558
MANBA	mannosidase, beta A, lysosomal	4126	yellow	0.024995971	0.360563589	-0.275084414	1.08E-24	0.097187556	0.000366969	-0.22589659	5.77E-17	0.318632687	5.34E-33	0.410226444	1.54E-55	0.316957313	1.19E-32	0.174938854	1.14E-10	0.293755504	4.44E-28	0.322806659	7.16E-34	0.459743092	4.85E-71	0.076748185	0.004939243	-0.15608533	9.27E-09	-0.135310445	6.65E-07	-0.232521309	6.57E-18	-0.228209462	2.72E-17	-0.095611527	0.000457085	-0.122240617	7.21E-06	0.20942313	9.56E-15
PIP5K1A	phosphatidylinositol-4-phosphate 5-kinase, type I, alpha	8394	yellow	0.064425496	0.018343522	0.206175876	2.49E-14	0.09605886	0.000429606	0.191199591	1.69E-12	-0.271452959	4.59E-24	-0.073789932	0.006885771	-0.241858578	2.74E-19	-0.170418046	3.42E-10	0.156642838	8.20E-09	0.351051557	3.79E-40	0.249076829	2.13E-20	-0.219223316	4.81E-16	-0.124058563	5.25E-06	-0.073248994	0.007308396	-0.106666338	9.15E-05	-0.159913287	3.95E-09	-0.15050728	3.10E-08	-0.088852302	0.001130199	0.156409267	8.63E-09
SDCCAG1	serologically defined colon cancer antigen 1	9147	yellow	0.175638921	9.56E-11	-0.074300778	0.006506929	0.095977776	0.00043447	-0.244797903	9.78E-20	0.344799694	1.06E-38	0.50616567	4.33E-88	0.277663924	3.81E-25	0.111662592	4.19E-05	0.057972815	0.033841287	0.408013922	6.62E-55	0.317664584	8.47E-33	0.183474828	1.31E-11	-0.03099832	0.256820404	0.039471244	0.148711103	-0.307349094	1.04E-30	-0.361148588	1.49E-42	-0.109496017	5.91E-05	-0.024282065	0.374448796	-0.003072229	0.910540053
ATP6V1E2	ATPase, H+ transporting, lysosomal 31kDa, V1 subunit E2	90423	yellow	0.006393012	0.815135091	-0.28805637	5.11E-27	0.095974184	0.000434686	0.135524398	6.38E-07	0.362219382	8.20E-43	0.334157734	2.58E-36	0.264811907	6.13E-23	0.27717143	4.65E-25	0.183483934	1.31E-11	0.124568287	4.80E-06	0.240404505	4.53E-19	-0.006313234	0.817401083	-0.083369695	0.002255847	-0.153527113	1.62E-08	0.0213708	0.434415052	-0.051333737	0.060298	0.115743419	2.16E-05	-0.071763397	0.008591155	0.019389067	0.478224778
RPL35A	ribosomal protein L35a	6165	yellow	-0.196547551	3.90E-13	-0.324822639	2.68E-34	0.095843802	0.000442618	0.064932498	0.017444134	0.767668656	7.77E-261	0.38052623	2.04E-47	0.267536007	2.14E-23	0.373599137	1.22E-45	0.117904169	1.51E-05	0.052089981	0.056608555	0.106857682	8.88E-05	0.492571022	8.01E-83	0.133206371	9.91E-07	0.157209392	7.23E-09	-0.110202841	5.29E-05	-0.101913472	0.000186305	-0.142026145	1.78E-07	-0.176922378	6.94E-11	0.027361163	0.316906268
RHBDF2	rhomboid 5 homolog 2 (Drosophila)	79651	yellow	-0.165858096	1.01E-09	-0.354618755	5.49E-41	0.094206768	0.000554395	0.060041687	0.027962045	0.635233184	2.56E-152	0.330098989	1.98E-35	0.346816005	3.65E-39	0.376205559	2.65E-46	0.271460029	4.58E-24	0.070582837	0.009750087	0.196658387	3.78E-13	0.231591063	8.95E-18	0.154271956	1.38E-08	0.045058715	0.099205444	0.090555972	0.000904636	0.056094172	0.040064413	0.109450086	5.95E-05	0.016048961	0.557218511	0.056830137	0.037519634
RPS3	ribosomal protein S3	6188	yellow	-0.232461734	6.70E-18	-0.514689538	1.62E-91	0.092895436	0.000662314	-0.081266323	0.002910986	0.845027708	0	0.488468287	2.80E-81	0.451873515	2.11E-68	0.37655395	2.16E-46	0.267748978	1.97E-23	0.245547468	7.51E-20	0.475158356	2.05E-76	0.461772181	9.86E-72	0.032465576	0.234975586	0.009208285	0.736289436	-0.104263534	0.000131552	-0.15809148	5.94E-09	-0.16355003	1.72E-09	-0.173268486	1.71E-10	0.078587592	0.003995127
RPSA	ribosomal protein SA	3921	yellow	-0.157874078	6.24E-09	-0.415847021	3.58E-57	0.091865234	0.000760451	0.054864948	0.044640624	0.736366284	2.76E-229	0.344584812	1.19E-38	0.360349081	2.33E-42	0.364768215	1.95E-43	0.159798714	4.05E-09	0.100248244	0.00023736	0.338592409	2.68E-37	0.302321209	1.02E-29	0.061720376	0.023859602	-0.008387329	0.759037079	0.031334341	0.251697427	-0.046716628	0.087368223	-0.046929665	0.085933364	-0.155225376	1.12E-08	-0.039835669	0.144994261
HNRNPA3P1	heterogeneous nuclear ribonucleoprotein A3 pseudogene 1	10151	yellow	0.045580271	0.095351145	-0.086186218	0.001589283	0.090792505	0.000876844	-0.191953445	1.38E-12	0.228769398	2.27E-17	0.35543715	3.51E-41	0.143695744	1.27E-07	-0.08351911	0.002214883	-0.02691345	0.324892861	0.209403809	9.61E-15	0.249743071	1.68E-20	0.232671212	6.25E-18	-0.172606916	2.01E-10	-0.055052479	0.04391523	0.047414395	0.08273941	-0.161199227	2.95E-09	0.188567414	3.43E-12	0.219176974	4.88E-16	-0.103194781	0.000154247
GSTM3	glutathione S-transferase mu 3 (brain)	2947	yellow	-0.383157394	4.20E-48	-0.340646925	9.27E-38	0.089888614	0.000987504	0.468570438	4.39E-74	0.391205174	3.05E-50	0.061084994	0.025346566	-0.062996599	0.021099853	0.395261104	2.42E-51	-0.037495647	0.170135832	-0.228980738	2.12E-17	-0.111636907	4.21E-05	0.134860956	7.24E-07	-0.051086082	0.061548665	-0.056272843	0.039433543	-0.082046023	0.002650198	-0.139394911	3.01E-07	-0.072368952	0.008045801	-0.236898855	1.51E-18	-0.081374237	0.002873548
RPL37A	ribosomal protein L37a	6168	yellow	-0.236127214	1.96E-18	-0.426274524	2.77E-60	0.089392794	0.001053558	-0.064965548	0.01738687	0.835346071	0	0.382975799	4.69E-48	0.399877916	1.29E-52	0.360882699	1.73E-42	0.232345042	6.97E-18	0.058534624	0.032148719	0.26540786	4.87E-23	0.452433201	1.38E-68	0.186177983	6.46E-12	0.065216778	0.016956933	0.020513873	0.453068498	0.010322573	0.705783025	-0.013884522	0.611588616	-0.035258555	0.197095252	0.041884854	0.125404262
NR3C2	nuclear receptor subfamily 3, group C, member 2	4306	yellow	0.410991316	9.26E-56	0.392582698	1.29E-50	0.088223271	0.001225862	0.100168243	0.000240116	-0.387407459	3.17E-49	-0.028583862	0.29575578	-0.223680075	1.18E-16	-0.126195562	3.59E-06	-0.00982688	0.719298988	0.16715264	7.44E-10	0.02426279	0.374828225	-0.353992209	7.72E-41	-0.168383973	5.56E-10	-0.078577187	0.003999971	-0.146590524	7.04E-08	-0.208091051	1.42E-14	0.015294806	0.575894178	-0.04585974	0.093335708	0.005176388	0.849848802
HEBP1	heme binding protein 1	50865	yellow	-0.362463314	7.15E-43	-0.620787995	1.33E-143	0.086392659	0.001548385	0.106395373	9.53E-05	0.680524938	6.26E-183	0.639485061	5.67E-155	0.482075282	6.47E-79	0.493094024	5.08E-83	0.102554682	0.000169552	0.127836854	2.67E-06	0.220873479	2.86E-16	0.285735327	1.36E-26	-0.155828683	9.81E-09	-0.089082729	0.001096916	-0.169830801	3.94E-10	-0.250169946	1.44E-20	-0.110732484	4.86E-05	-0.197640379	2.87E-13	-0.024502693	0.370122815
MEIG1	meiosis expressed gene 1 homolog (mouse)	644890	yellow	-0.31861076	5.40E-33	-0.302979059	7.56E-30	0.086153993	0.001595755	0.22991113	1.56E-17	0.325055377	2.39E-34	0.102333611	0.000175161	0.0344893	0.207052142	0.174693577	1.21E-10	0.311324276	1.67E-31	-0.122164028	7.31E-06	0.079255659	0.003694963	0.060448562	0.026915626	0.065981419	0.015705203	-0.08527297	0.001782395	0.065270991	0.016865389	0.068426351	0.012230779	0.103414919	0.000149291	-0.0361531	0.185962426	0.269390714	1.03E-23
RPS15A	ribosomal protein S15a	6210	yellow	-0.215420192	1.56E-15	-0.479437936	5.91E-78	0.084988528	0.001846805	-0.089479461	0.001041725	0.827357147	0	0.511353828	3.65E-90	0.387823278	2.46E-49	0.395846055	1.67E-51	0.158240129	5.75E-09	0.114243731	2.77E-05	0.235442123	2.47E-18	0.484372444	9.28E-80	0.064147332	0.018853987	0.026532132	0.331797342	-0.093821281	0.000584288	-0.130408149	1.67E-06	-0.028251884	0.301402761	-0.021289055	0.436175104	0.033823462	0.215960684
FBXO42	F-box protein 42	54455	yellow	0.378691574	6.09E-47	0.435552952	3.80E-63	0.084190487	0.002039089	0.090574868	0.000902386	-0.407636894	8.48E-55	-0.043706084	0.1097814	-0.266524069	3.16E-23	-0.191708606	1.47E-12	-0.053156111	0.051727736	0.297621538	8.20E-29	-0.054049745	0.047912337	-0.230937322	1.11E-17	-0.096857454	0.000384344	0.068150293	0.012585649	-0.109142064	6.24E-05	-0.16946259	4.30E-10	0.017971382	0.510988215	0.088827018	0.001133907	0.021941702	0.422237639
CA8	carbonic anhydrase VIII	767	yellow	-0.077681877	0.004437378	-0.085499073	0.001732674	0.084005644	0.002086167	0.140968316	2.20E-07	0.259842366	4.06E-22	0.068057612	0.012706816	-0.045540405	0.095641466	0.184216351	1.08E-11	0.104476571	0.000127421	0.036030175	0.187464121	0.063479695	0.020130112	0.254437185	3.04E-21	0.030813051	0.259675739	0.08041935	0.003220618	-0.243043356	1.81E-19	-0.165410212	1.12E-09	-0.131360596	1.40E-06	-0.101972727	0.000184694	0.063838105	0.019435984
TIMP4	TIMP metallopeptidase inhibitor 4	7079	yellow	-0.066908813	0.014296558	-0.387667381	2.70E-49	0.08314441	0.002318924	-0.091270459	0.000823084	0.524728936	1.12E-95	0.367545555	4.03E-44	0.273010848	2.47E-24	0.404930023	4.97E-54	0.240494372	4.39E-19	0.301953851	1.20E-29	0.402411493	2.54E-53	0.222019738	1.99E-16	-0.010284183	0.706826562	-0.078141357	0.004207763	-0.037803834	0.16664939	-0.099096153	0.000280064	-0.056510188	0.03860854	-0.067030668	0.014120002	0.090116179	0.000958489
FAM135A	family with sequence similarity 135, member A	57579	yellow	0.334684652	1.97E-36	0.342189063	4.16E-38	0.082619144	0.002472306	-0.127001899	3.11E-06	-0.365938462	1.01E-43	0.046253646	0.090553126	-0.116148925	2.02E-05	-0.231514222	9.18E-18	0.070833912	0.009492566	0.226607466	4.58E-17	0.070592358	0.009740208	-0.29572838	1.88E-28	-0.1058881	0.000102987	-0.050436468	0.064931477	-0.207129429	1.88E-14	-0.143759514	1.26E-07	0.046347661	0.089898946	0.065371594	0.016696658	0.112519929	3.66E-05
LOC647030	eukaryotic translation elongation factor 1 beta 2-like	647030	yellow	-0.199014755	1.95E-13	-0.418585431	5.59E-58	0.082059057	0.002646026	0.022432531	0.411929774	0.633573918	2.71E-151	0.334113928	2.64E-36	0.293015148	6.12E-28	0.271484472	4.53E-24	0.057944006	0.033930094	-0.24500122	9.10E-20	-0.06193995	0.023363615	0.317163968	1.07E-32	0.091091835	0.000842808	0.01768499	0.517746282	0.018433098	0.500190687	0.052977271	0.052521029	0.230653205	1.22E-17	0.080530033	0.003178519	-0.114368838	2.71E-05
PYCARD	PYD and CARD domain containing	29108	yellow	-0.131437498	1.38E-06	-0.363195416	4.74E-43	0.081893696	0.002699406	-0.11360469	3.07E-05	0.602146662	5.23E-133	0.286420593	1.02E-26	0.2036677	5.17E-14	0.232352219	6.95E-18	0.296850549	1.15E-28	0.200989962	1.12E-13	0.344244946	1.42E-38	0.383649793	3.12E-48	0.032604478	0.232977827	-0.028329589	0.300074601	-0.002918037	0.915012504	0.038242979	0.161774534	-0.023341875	0.393231432	-0.028451418	0.298000127	0.173396816	1.66E-10
SUSD3	sushi domain containing 3	203328	yellow	-0.198882741	2.03E-13	-0.343531391	2.06E-38	0.080679014	0.003122645	0.03814149	0.162891467	0.632544552	1.16E-150	0.198511022	2.25E-13	0.285477662	1.51E-26	0.289995402	2.24E-27	0.283065075	4.14E-26	-0.093120639	0.000642491	0.104161728	0.00013357	0.274530576	1.35E-24	0.223547372	1.23E-16	0.051831761	0.057846633	0.134131885	8.32E-07	0.157409824	6.92E-09	0.080144579	0.00332733	-0.018383843	0.501336754	0.111702684	4.17E-05
UBE2CBP	ubiquitin-conjugating enzyme E2C binding protein	90025	yellow	-0.354666628	5.35E-41	-0.288666608	3.94E-27	0.07963144	0.003535269	0.312642835	9.03E-32	0.442276047	2.82E-65	0.020466693	0.454108452	0.037996677	0.16449527	0.266784767	2.86E-23	0.082496988	0.002509281	-0.273875702	1.75E-24	-0.014670565	0.591572588	0.224703089	8.47E-17	0.089749588	0.001005628	0.047553683	0.081839612	0.063028065	0.021035475	0.038918239	0.1544895	-0.027931519	0.306919782	-0.11368902	3.03E-05	-0.047213369	0.084052138
APBB1IP	amyloid beta (A4) precursor protein-binding, family B, member 1 interacting protein	54518	yellow	-0.286125505	1.15E-26	-0.366369596	7.87E-44	0.078603528	0.003987716	0.068801057	0.011763275	0.700369612	3.65E-198	0.249295813	1.97E-20	0.338383314	2.98E-37	0.332721372	5.32E-36	0.169144007	4.64E-10	-0.176251947	8.21E-11	0.040575719	0.137665608	0.369995808	9.87E-45	0.208631852	1.21E-14	0.118913628	1.27E-05	0.082093535	0.002635018	0.048602807	0.075314288	0.051492155	0.059509074	-0.040183629	0.141512089	-0.013465074	0.622390678
TMSB4Y	thymosin beta 4, Y-linked	9087	yellow	-0.11290274	3.44E-05	-0.30039382	2.40E-29	0.078342964	0.004110456	0.038818989	0.155544379	0.369092328	1.66E-44	0.449007636	1.85E-67	0.357198564	1.33E-41	0.264914476	5.89E-23	0.07112098	0.009205567	0.033447711	0.221108071	0.055436507	0.042460745	0.052844501	0.053116518	-0.044965617	0.099906326	-0.033724078	0.217313671	-0.009402129	0.730950959	-0.047766684	0.080478974	0.188409469	3.58E-12	0.062365112	0.022428601	-0.017339504	0.525959848
LASS1	LAG1 homolog, ceramide synthase 1	10715	yellow	-0.230891013	1.13E-17	-0.320334172	2.36E-33	0.077623228	0.004467488	0.070070902	0.010294512	0.528584159	2.58E-97	0.261650789	2.05E-22	0.359107897	4.65E-42	0.484414434	8.95E-80	0.153498841	1.63E-08	0.169902613	3.87E-10	0.351446821	3.07E-40	0.1633659	1.80E-09	0.078251924	0.004154142	0.069886042	0.010497647	0.061645478	0.024030862	-0.089402033	0.00105229	-0.200668589	1.22E-13	-0.299867735	3.04E-29	-0.025512804	0.350715523
RPS19	ribosomal protein S19	6223	yellow	-0.289471303	2.80E-27	-0.559580713	2.88E-111	0.077238099	0.004669853	0.030461702	0.26515079	0.873674173	0	0.436718272	1.64E-63	0.440125544	1.37E-64	0.480154075	3.25E-78	0.172543633	2.04E-10	0.103131501	0.0001557	0.351043446	3.81E-40	0.437676831	8.17E-64	0.048134308	0.078173836	-0.006987397	0.79830209	0.018973291	0.487713084	-0.097983463	0.000328046	-0.102179355	0.000179178	-0.167596451	6.70E-10	-0.037425933	0.170932001
RPS8	ribosomal protein S8	6202	yellow	-0.216307466	1.19E-15	-0.434104136	1.08E-62	0.076848941	0.00488272	-0.03896334	0.154011955	0.755713525	3.19E-248	0.509066766	3.03E-89	0.365025682	1.69E-43	0.345044663	9.31E-39	0.156764304	7.98E-09	0.17885003	4.28E-11	0.212253233	4.09E-15	0.406572666	1.70E-54	0.093928125	0.000575856	0.069267941	0.011202962	-0.147581338	5.73E-08	-0.118815018	1.30E-05	-0.02372921	0.385425385	-0.024892848	0.362549097	0.035682343	0.191761803
ZNRF2	zinc and ring finger 2	223082	yellow	-0.023292689	0.39422948	0.10653587	9.33E-05	0.076178598	0.005270038	-0.171127868	2.88E-10	0.262443327	1.52E-22	0.10321418	0.000153804	0.055363484	0.042734138	-0.012307505	0.652620118	0.055599959	0.041854144	0.02153396	0.430914304	0.03281899	0.229916284	0.407911003	7.08E-55	0.058404776	0.032533335	0.222731738	1.59E-16	-0.111601542	4.23E-05	-0.075079032	0.005965705	-0.163937638	1.58E-09	-0.067133273	0.01397283	0.098195677	0.000318339
TYROBP	TYRO protein tyrosine kinase binding protein	7305	yellow	-0.218899301	5.32E-16	-0.408796968	3.95E-55	0.075357223	0.005782298	0.02558651	0.349325105	0.775595932	1.26E-269	0.265727312	4.31E-23	0.372074274	2.97E-45	0.393347159	8.03E-51	0.232836051	5.92E-18	-0.106317449	9.65E-05	0.116711056	1.84E-05	0.426037548	3.27E-60	0.179564476	3.57E-11	0.090345683	0.000930026	0.100788882	0.000219498	0.102807091	0.000163354	-0.008767796	0.748467556	-0.116007137	2.07E-05	0.047676913	0.08105017
INTS12	integrator complex subunit 12	57117	yellow	-0.04065525	0.136895308	-0.089353429	0.001058973	0.074931746	0.006064913	-0.068431533	0.012224203	0.277781618	3.63E-25	0.217101898	9.29E-16	0.146333274	7.42E-08	0.147269816	6.11E-08	0.041051241	0.133109275	-0.023285039	0.394384857	0.050290111	0.065714397	0.309600233	3.71E-31	-0.087494946	0.001345931	0.111429786	4.35E-05	-0.191657324	1.50E-12	-0.195243985	5.60E-13	-0.186960189	5.26E-12	-0.211367255	5.34E-15	0.053849421	0.048746426
PARP8	poly (ADP-ribose) polymerase family, member 8	79668	yellow	0.1627935	2.05E-09	0.606038401	3.67E-135	0.074740821	0.006195724	0.116187202	2.01E-05	-0.479593432	5.19E-78	-0.454820457	2.21E-69	-0.420715382	1.30E-58	-0.287219807	7.28E-27	-0.053334078	0.050948284	-0.358496735	6.52E-42	-0.388201332	1.95E-49	-0.205930604	2.68E-14	0.144183103	1.15E-07	0.145458285	8.89E-08	0.052639095	0.054048876	0.137077233	4.73E-07	0.128603445	2.33E-06	0.010234426	0.708179877	0.055425223	0.042502895
COG6	component of oligomeric golgi complex 6	57511	yellow	0.033261366	0.223693149	0.164120491	1.51E-09	0.074579209	0.006308428	0.025946866	0.342577567	0.274451748	1.39E-24	-0.02132147	0.43547669	-0.025568753	0.349659756	0.079430434	0.003619892	-0.090960518	0.000857586	-0.197440328	3.04E-13	-0.170321449	3.50E-10	0.355944053	2.66E-41	0.128394059	2.42E-06	0.256536427	1.40E-21	-0.049522248	0.069950338	-0.053948161	0.048333794	-0.067782175	0.013073015	-0.038838387	0.155337782	-0.079774783	0.003476024
GPRIN2	G protein regulated inducer of neurite outgrowth 2	9721	yellow	-0.073856865	0.006835031	-0.280288027	1.30E-25	0.074365296	0.006460439	-0.095238425	0.000481247	0.381902906	8.94E-48	0.221087435	2.68E-16	0.196056733	4.47E-13	0.254323493	3.17E-21	0.219150103	4.92E-16	0.103972963	0.000137389	0.198271309	2.41E-13	0.180413516	2.88E-11	0.00388401	0.887043691	-0.036200857	0.185381406	-0.086292286	0.001568147	-0.015757313	0.564405778	-0.012458628	0.648639709	-0.025908184	0.343297862	0.158677708	5.21E-09
RGS18	regulator of G-protein signaling 18	64407	yellow	-0.219576253	4.30E-16	-0.263928472	8.61E-23	0.072863518	0.007623597	0.120274265	1.01E-05	0.523593332	3.35E-95	0.178195189	5.05E-11	0.257702055	9.07E-22	0.256715219	1.31E-21	0.504125796	2.77E-87	-0.090663051	0.000891955	0.079815609	0.003459316	0.286789327	8.72E-27	0.237500958	1.23E-18	0.105775312	0.000104764	0.120872801	9.13E-06	0.186557999	5.85E-12	0.083678936	0.002171819	0.009019907	0.741489598	0.366897348	5.83E-44
YIF1A	Yip1 interacting factor homolog A (S. cerevisiae)	10897	yellow	-0.126982335	3.12E-06	-0.550990121	2.97E-107	0.07251168	0.007921859	-0.226440913	4.84E-17	0.736825621	1.03E-229	0.578226893	2.13E-120	0.630929339	1.13E-149	0.522507634	9.56E-95	0.223042016	1.44E-16	0.323574751	4.93E-34	0.537608526	3.15E-101	0.297313746	9.39E-29	-0.081950192	0.002681059	-0.097491486	0.000351622	0.077471482	0.004546256	-0.068389119	0.012278117	-0.133926577	8.65E-07	-0.205900729	2.70E-14	-0.020827064	0.446199174
CLDND2	claudin domain containing 2	125875	yellow	-0.143323099	1.37E-07	-0.187747187	4.27E-12	0.07243245	0.007990448	0.145777876	8.32E-08	0.378565075	6.56E-47	0.137456677	4.39E-07	0.144383872	1.11E-07	0.373065982	1.67E-45	0.183263946	1.38E-11	-0.062360834	0.022437846	0.055563893	0.041987359	0.101405859	0.000200657	0.09169011	0.000778417	0.013020474	0.633929779	-0.006649484	0.807860838	0.016791584	0.539121127	-0.043783098	0.109156261	-0.195577656	5.10E-13	0.145460944	8.88E-08
ZMYND10	zinc finger, MYND-type containing 10	51364	yellow	-0.352218164	2.02E-40	-0.411472752	6.72E-56	0.072239465	0.008159741	0.262416072	1.53E-22	0.40005126	1.16E-52	0.154353064	1.35E-08	0.101777005	0.000190066	0.264951302	5.81E-23	0.341272758	6.70E-38	0.030011638	0.272279451	0.223001187	1.46E-16	0.168118405	5.92E-10	-0.059917941	0.02828717	-0.077596587	0.004481227	-0.015317693	0.575323111	-0.056682758	0.038017934	-0.100102842	0.000242391	-0.155245621	1.11E-08	0.263950102	8.53E-23
EEF1D	eukaryotic translation elongation factor 1 delta (guanine nucleotide exchange protein)	1936	yellow	-0.044346033	0.104671808	-0.45881294	1.00E-70	0.071157442	0.009169673	-0.288369401	4.47E-27	0.734352071	2.07E-227	0.528568038	2.62E-97	0.585520233	3.94E-124	0.375893978	3.18E-46	0.244981308	9.17E-20	0.414801404	7.25E-57	0.63952718	5.33E-155	0.336933696	6.28E-37	-0.012239739	0.654408232	-0.030405539	0.266033289	0.007356622	0.787892039	-0.137811952	4.10E-07	-0.108728085	6.66E-05	-0.112637283	3.59E-05	0.002771633	0.919261578
PEBP4	phosphatidylethanolamine-binding protein 4	157310	yellow	-0.044992363	0.099704567	-0.482264527	5.52E-79	0.070977322	0.009348209	-0.118205114	1.44E-05	0.567806545	3.19E-115	0.394481952	3.95E-51	0.444171987	6.92E-66	0.553849961	1.41E-108	0.24107009	3.60E-19	0.074621841	0.00627852	0.34011959	1.22E-37	0.155770969	9.93E-09	-0.049849972	0.068115822	-0.103960885	0.000137637	-0.00860061	0.753106375	-0.02809068	0.304170562	-0.043179324	0.114133313	-0.154105485	1.43E-08	0.007550087	0.782452392
CH25H	cholesterol 25-hydroxylase	9023	yellow	-0.09045796	0.000916389	-0.376106744	2.81E-46	0.06799449	0.012789927	-0.059474462	0.029479204	0.515254825	9.53E-92	0.36639975	7.74E-44	0.361080238	1.55E-42	0.366660074	6.67E-44	0.146893608	6.61E-08	0.011327836	0.678659391	0.157084976	7.43E-09	0.183940701	1.16E-11	-0.019755239	0.469952635	-0.048232865	0.077565056	0.05832821	0.032761967	-0.035742297	0.191015915	0.061817503	0.023639092	-0.056472585	0.03873826	0.01337303	0.624772104
HCST	hematopoietic cell signal transducer	10870	yellow	-0.316243621	1.66E-32	-0.422835268	3.03E-59	0.067502988	0.013453685	0.061687042	0.023935691	0.698783539	6.70E-197	0.188909881	3.13E-12	0.223760155	1.15E-16	0.346064057	5.43E-39	0.195628752	5.03E-13	-0.137319747	4.51E-07	0.058361868	0.032661295	0.397130668	7.43E-52	0.1764589	7.79E-11	0.057504995	0.035308215	0.140328928	2.50E-07	0.145246624	9.28E-08	0.005389835	0.843735458	-0.078918422	0.003843825	0.069096562	0.011405825
TSPAN4	tetraspanin 4	7106	yellow	-0.237116397	1.40E-18	-0.368487802	2.35E-44	0.065696256	0.016162193	0.140349945	2.49E-07	0.362595625	6.64E-43	0.204130424	4.52E-14	0.111126841	4.57E-05	0.334500949	2.17E-36	0.166734051	8.21E-10	0.258535599	6.64E-22	0.329050946	3.34E-35	0.121850133	7.71E-06	-0.071431672	0.008903689	-0.101374491	0.000201577	0.05453814	0.045928891	-0.029408382	0.282038381	-0.023894993	0.382113432	-0.071349734	0.008982433	0.011618716	0.670886056
FBL	fibrillarin	2091	yellow	-0.293497023	4.97E-28	-0.501215443	3.82E-86	0.065559434	0.016385573	0.042416366	0.120675779	0.77095241	1.96E-264	0.553216233	2.78E-108	0.441276062	5.88E-65	0.387187656	3.63E-49	0.162657348	2.12E-09	0.27587068	7.87E-25	0.308601369	5.87E-31	0.416745448	1.95E-57	0.03761205	0.168812631	0.05961422	0.029098972	-0.149259745	4.03E-08	-0.185139146	8.49E-12	-0.169351392	4.41E-10	-0.129990831	1.80E-06	0.027326595	0.317518283
CALR	calreticulin	811	yellow	-0.122508787	6.88E-06	-0.304433746	3.92E-30	0.064736156	0.017787743	0.002906351	0.915351589	0.51165695	2.75E-90	0.356839486	1.63E-41	0.379504054	3.75E-47	0.373647086	1.19E-45	0.024095121	0.378138654	0.102180494	0.000179148	0.19070026	1.94E-12	0.353282881	1.14E-40	-0.111375816	4.39E-05	0.063193162	0.020700484	0.048907635	0.073499957	-0.138196542	3.80E-07	-0.295365872	2.20E-28	-0.398292945	3.55E-52	-0.0391036	0.152533958
RPS18	ribosomal protein S18	6222	yellow	-0.294839497	2.77E-28	-0.489070878	1.67E-81	0.064606268	0.018018297	0.01445303	0.597081821	0.806618965	7.70E-308	0.362060486	8.97E-43	0.367923559	3.24E-44	0.395807699	1.71E-51	0.151151642	2.70E-08	-0.071877898	0.008485574	0.142964106	1.48E-07	0.411133167	8.42E-56	0.167495284	6.86E-10	0.012152335	0.656717449	0.089192739	0.001081347	0.094256243	0.000550663	0.125677417	3.94E-06	0.028013887	0.305494981	-0.052928558	0.052738862
FAM104B	family with sequence similarity 104, member B	90736	yellow	0.058220965	0.03308452	-0.141619779	1.93E-07	0.064427232	0.018340373	-0.083507936	0.002217923	0.388677069	1.45E-49	0.437296186	1.08E-63	0.287645425	6.08E-27	0.300364725	2.44E-29	-0.012954593	0.635647308	0.170984917	2.98E-10	0.166706853	8.26E-10	0.324109856	3.80E-34	-0.168198351	5.81E-10	0.094834688	0.000508731	-0.183070593	1.45E-11	-0.292944353	6.31E-28	-0.122558928	6.82E-06	-0.132908856	1.05E-06	-0.053679761	0.049462335
LOC100287572	similar to hCG1996962	100287572	yellow	-0.17842653	4.76E-11	-0.450652748	5.33E-68	0.061523267	0.02431259	-0.078669933	0.003956972	0.443899797	8.47E-66	0.490331531	5.61E-82	0.445504685	2.57E-66	0.327167221	8.48E-35	0.279375333	1.90E-25	0.41523384	5.42E-57	0.585794425	2.84E-124	0.113613534	3.07E-05	-0.150432135	3.15E-08	-0.142251492	1.70E-07	-0.101294521	0.000203941	-0.195629878	5.03E-13	-0.100602264	0.000225516	-0.100017971	0.000245374	0.110255893	5.24E-05
ITGAX	integrin, alpha X (complement component 3 receptor 4 subunit)	3687	yellow	-0.170802126	3.12E-10	-0.350654268	4.70E-40	0.061398924	0.024602163	-0.017653253	0.518498006	0.610282309	1.52E-137	0.248629769	2.50E-20	0.366237187	8.49E-44	0.287620483	6.14E-27	0.384433374	1.94E-48	0.007934914	0.771663971	0.217920518	7.21E-16	0.281391222	8.28E-26	0.173326568	1.69E-10	0.04894111	0.073302909	0.096785882	0.000388211	0.150981076	2.80E-08	0.050720333	0.063434883	-0.020311794	0.457532231	0.20897289	1.09E-14
LOC729983	hypothetical LOC729983	729983	yellow	-0.079006743	0.003804321	-0.084291494	0.002013777	0.060738167	0.026191538	0.104142013	0.000133964	0.351243617	3.42E-40	0.073720067	0.006939093	0.265149264	5.38E-23	0.30979304	3.39E-31	0.22397851	1.07E-16	0.032455902	0.235115183	0.161407848	2.82E-09	-0.00190541	0.944444828	0.230154712	1.44E-17	0.08041911	0.00322071	0.086658378	0.001497169	0.116372545	1.95E-05	-0.055744063	0.041325439	-0.121844274	7.72E-06	0.021051196	0.441319773
TNFSF13B	tumor necrosis factor (ligand) superfamily, member 13b	10673	yellow	0.020757432	0.447721285	0.126721848	3.27E-06	0.06036382	0.02713074	0.115321085	2.32E-05	0.118880816	1.28E-05	-0.120245889	1.02E-05	-0.061419692	0.02455359	0.005911152	0.8288446	0.272282784	3.30E-24	-0.063817974	0.019474411	0.032022039	0.241435803	0.065803184	0.015989485	0.176824733	7.11E-11	0.103386348	0.000149925	0.085662097	0.001697618	0.11052559	5.02E-05	-0.03193272	0.242751713	-0.071252055	0.009077115	0.281032568	9.60E-26
SEC61A1	Sec61 alpha 1 subunit (S. cerevisiae)	29927	yellow	-0.036927239	0.176708844	-0.207680287	1.60E-14	0.059389831	0.029711524	-0.078150387	0.00420336	0.29303113	6.07E-28	0.258363653	7.08E-22	0.149647307	3.71E-08	0.128128985	2.53E-06	0.406653238	1.62E-54	0.272090844	3.57E-24	0.348887991	1.21E-39	0.146486392	7.19E-08	-0.019918493	0.466290211	-0.071370368	0.008962545	-0.093841161	0.00058271	-0.082336171	0.002558728	-0.057860226	0.034189487	-0.053141547	0.051791962	0.423025789	2.65E-59
ZMYND12	zinc finger, MYND-type containing 12	84217	yellow	-0.161580354	2.71E-09	-0.350557164	4.95E-40	0.059352113	0.029815569	0.044333088	0.104773265	0.470455458	9.57E-75	0.27713799	4.71E-25	0.248676445	2.46E-20	0.431145275	8.93E-62	0.113874355	2.94E-05	0.063001368	0.021090087	0.199214784	1.85E-13	0.178698381	4.45E-11	-0.056030419	0.04029158	-0.021256435	0.436878599	-0.063208048	0.020670509	-0.124044725	5.26E-06	-0.122873985	6.46E-06	-0.187372173	4.72E-12	0.031165797	0.254258076
GPR34	G protein-coupled receptor 34	2857	yellow	-0.257587419	9.46E-22	-0.324010471	3.99E-34	0.058378207	0.032612518	0.081024725	0.002996419	0.602683008	2.65E-133	0.15783584	6.29E-09	0.256084068	1.65E-21	0.244740905	9.98E-20	0.328241138	4.99E-35	-0.199103095	1.90E-13	0.023017357	0.399844579	0.346252056	4.92E-39	0.204755839	3.77E-14	0.089547565	0.001032513	0.113766625	2.99E-05	0.169308896	4.46E-10	0.079121329	0.003753619	-0.010114273	0.711451704	0.218275272	6.46E-16
LOC157627	hypothetical LOC157627	157627	yellow	0.515151321	1.05E-91	0.597869444	1.13E-130	0.057995239	0.0337723	0.036127824	0.186270474	-0.60157146	1.08E-132	-0.186298726	6.26E-12	-0.394510133	3.88E-51	-0.423414079	2.03E-59	0.023752603	0.384956993	0.32185409	1.14E-33	-0.01570941	0.565590534	-0.391790012	2.12E-50	-0.037905673	0.165509194	-0.056438787	0.038855173	-0.023097979	0.398195426	0.006573174	0.810023493	0.191984783	1.37E-12	0.241405266	3.20E-19	0.082087252	0.002637021
ANKRD58	ankyrin repeat domain 58	347454	yellow	-0.135870209	5.97E-07	-0.229315175	1.90E-17	0.057764016	0.034489451	0.048523772	0.075790618	0.389450085	9.03E-50	0.059742019	0.028754974	0.19071547	1.93E-12	0.138777605	3.40E-07	0.326315231	1.29E-34	-0.180407838	2.88E-11	0.049363606	0.070852818	0.15580875	9.85E-09	0.182497313	1.69E-11	-0.006898138	0.800824129	0.282850267	4.53E-26	0.364806691	1.91E-43	0.210796267	6.34E-15	0.089529284	0.001034978	0.176945801	6.90E-11
SPRY2	sprouty homolog 2 (Drosophila)	10253	yellow	0.201039856	1.10E-13	0.327417099	7.50E-35	0.057673257	0.034774476	0.002359163	0.931244569	-0.303314261	6.50E-30	-0.065322973	0.016778019	-0.214187772	2.27E-15	-0.103104208	0.000156331	0.042228825	0.122328027	0.17379334	1.51E-10	0.032453731	0.235146508	-0.222446479	1.74E-16	-0.086318858	0.001562893	-0.039171466	0.151822711	-0.24234993	2.31E-19	-0.192654284	1.14E-12	-0.084513297	0.001959201	-0.059268237	0.030048065	0.117703998	1.56E-05
AMDHD1	amidohydrolase domain containing 1	144193	yellow	0.032727089	0.231224391	-0.320739972	1.94E-33	0.056311708	0.039297433	0.050671948	0.063687946	0.284083238	2.71E-26	0.265661886	4.42E-23	0.159922571	3.94E-09	0.11591571	2.10E-05	0.317798946	7.95E-33	0.130346443	1.69E-06	0.168371472	5.58E-10	0.171119781	2.89E-10	-0.116000971	2.07E-05	-0.10915943	6.22E-05	0.016776521	0.539485265	0.024954594	0.361359426	0.024095927	0.378122708	0.022523784	0.410029951	0.24644658	5.46E-20
PTPLAD2	protein tyrosine phosphatase-like A domain containing 2	401494	yellow	-0.384350174	2.04E-48	-0.410695699	1.13E-55	0.055813989	0.04107093	0.283229264	3.87E-26	0.485725131	2.94E-80	0.095194914	0.000484141	0.117243516	1.69E-05	0.309101334	4.66E-31	0.279218707	2.02E-25	-0.193630951	8.73E-13	0.035488846	0.194183702	0.249223758	2.02E-20	0.074027256	0.006707377	-0.021864344	0.423875893	0.088178223	0.001232992	0.104153703	0.00013373	0.046971281	0.085655302	-0.043733577	0.109557914	0.187569732	4.48E-12
RASSF1	Ras association (RalGDS/AF-6) domain family member 1	11186	yellow	0.01807971	0.50844401	-0.279550657	1.76E-25	0.055231244	0.04323302	-0.152273918	2.12E-08	0.372905997	1.83E-45	0.395652242	1.89E-51	0.324283921	3.49E-34	0.151709506	2.40E-08	0.158816289	5.06E-09	0.39220854	1.63E-50	0.414207038	1.08E-56	0.141271055	2.07E-07	-0.068394107	0.012271766	-0.082778142	0.002424926	-0.032938468	0.228223535	-0.085972635	0.001632639	-0.098077048	0.000323731	-0.058623435	0.031887903	0.060059143	0.027916442
CHL1	cell adhesion molecule with homology to L1CAM (close homolog of L1)	10752	yellow	0.125169231	4.31E-06	0.526376557	2.24E-96	0.055230795	0.043234725	0.354008495	7.65E-41	-0.481290905	1.25E-78	-0.346081743	5.38E-39	-0.411088407	8.68E-56	-0.189119755	2.96E-12	-0.200979104	1.12E-13	-0.300851252	1.96E-29	-0.461475166	1.25E-71	-0.267045241	2.59E-23	0.029647438	0.278143176	0.114496836	2.66E-05	-0.09657051	0.000400068	-0.038426417	0.159770364	0.100422953	0.000231444	0.044180223	0.105977238	-0.105382092	0.000111188
HHLA3	HERV-H LTR-associating 3	11147	yellow	-0.150559084	3.06E-08	-0.21507966	1.73E-15	0.055183514	0.04341429	0.055229046	0.043241356	0.342531308	3.48E-38	0.145080786	9.60E-08	0.178369617	4.83E-11	0.24292641	1.89E-19	0.179485643	3.64E-11	-0.084414271	0.001983397	0.083640906	0.002181996	0.160684938	3.32E-09	0.062163462	0.022867938	0.041095414	0.132692009	-0.047887605	0.079714741	-0.049991958	0.067333383	-0.044805653	0.101119808	-0.103105436	0.000156302	0.080992977	0.003007814
UXS1	UDP-glucuronate decarboxylase 1	80146	yellow	0.419532015	2.93E-58	0.475020166	2.30E-76	0.055087198	0.043782026	0.036607258	0.180491268	-0.42607442	3.19E-60	-0.134637935	7.56E-07	-0.160159002	3.74E-09	-0.075165742	0.005907984	-0.108787146	6.60E-05	0.117758682	1.55E-05	-0.047226558	0.083965497	-0.248184771	2.94E-20	-0.162439823	2.22E-09	0.106388299	9.54E-05	-0.159686874	4.16E-09	-0.200770215	1.19E-13	-0.124859176	4.56E-06	-0.163226832	1.86E-09	-0.094650445	0.000521753
HSF4	heat shock transcription factor 4	3299	yellow	0.336421477	8.15E-37	0.394742848	3.35E-51	0.054694758	0.045307658	-0.051926573	0.057389455	-0.336556807	7.61E-37	-0.197643745	2.87E-13	-0.181303211	2.29E-11	-0.262092012	1.73E-22	0.150443305	3.14E-08	0.305166844	2.82E-30	0.22341334	1.28E-16	-0.20328801	5.77E-14	0.017430355	0.523793535	-0.007135838	0.794112477	0.090405094	0.000922787	0.130537487	1.63E-06	0.02588271	0.343772747	0.039114774	0.152416679	0.131066177	1.48E-06
LOC572558	hypothetical locus LOC572558	572558	yellow	-0.356068931	2.48E-41	-0.354511558	5.82E-41	0.053110105	0.051930844	0.153851408	1.51E-08	0.331189875	1.15E-35	0.22798312	2.93E-17	0.045943244	0.092740177	0.124120875	5.19E-06	0.272328643	3.25E-24	0.179712409	3.44E-11	0.276146666	7.04E-25	0.216431384	1.14E-15	-0.025152289	0.357566876	-0.05047649	0.064718726	-0.069258512	0.011214039	-0.09910242	0.000279813	-0.068855147	0.011697113	-0.040151449	0.141831416	0.261017847	2.61E-22
EIF3E	eukaryotic translation initiation factor 3, subunit E	3646	yellow	-0.090883461	0.00086637	-0.301829103	1.27E-29	0.053020353	0.052329007	-0.010630471	0.697433753	0.449299201	1.49E-67	0.525629335	4.65E-96	0.187227203	4.90E-12	0.122103065	7.38E-06	0.082323944	0.002562523	0.266371031	3.36E-23	0.155620877	1.03E-08	0.390048544	6.24E-50	-0.132999667	1.03E-06	0.030141797	0.270204495	-0.270652753	6.30E-24	-0.254090656	3.45E-21	-0.007496893	0.783947006	0.064550882	0.0181174	0.065456369	0.016555625
CLEC9A	C-type lectin domain family 9, member A	283420	yellow	-0.245286316	8.23E-20	-0.409323648	2.79E-55	0.052398159	0.055159859	0.098770083	0.000293397	0.656496739	4.98E-166	0.276876671	5.24E-25	0.29818354	6.40E-29	0.365314096	1.43E-43	0.260877167	2.75E-22	-0.083410099	0.002244702	0.060380476	0.027088343	0.337758051	4.11E-37	0.177022874	6.77E-11	0.075948102	0.005409489	0.05066492	0.063724772	0.083982204	0.002092208	0.049427702	0.07048705	-0.031450162	0.249948234	0.113217517	3.27E-05
PANK3	pantothenate kinase 3	79646	yellow	0.033443948	0.221160061	0.270888622	5.74E-24	0.052159497	0.056279036	0.120650494	9.48E-06	-0.360358304	2.32E-42	-0.001361169	0.960297302	-0.212806535	3.46E-15	-0.210119843	7.76E-15	-0.15299014	1.82E-08	-0.020310624	0.45755816	-0.20425579	4.36E-14	-0.07793902	0.004307516	-0.125267548	4.24E-06	0.083854389	0.002125429	-0.15105811	2.75E-08	-0.192133547	1.31E-12	0.055192901	0.043378588	0.165193082	1.18E-09	-0.07368308	0.006967471
SRSF3	serine/arginine-rich splicing factor 3	6428	yellow	-0.013942493	0.610102243	-0.177270634	6.36E-11	0.052131067	0.056413609	-0.097676655	0.000342569	0.384393856	1.99E-48	0.523973575	2.32E-95	0.233055092	5.50E-18	0.207496455	1.69E-14	-0.006005317	0.826161268	0.244649922	1.03E-19	0.05205856	0.056758022	0.334313623	2.38E-36	-0.068053202	0.012712607	0.106503963	9.38E-05	-0.247898435	3.25E-20	-0.229279585	1.92E-17	-0.086170155	0.001592506	0.006843608	0.802365924	0.011815568	0.665645305
TMEM27	transmembrane protein 27	57393	yellow	-0.131477517	1.37E-06	-0.208939971	1.10E-14	0.051773291	0.058130078	0.141183757	2.11E-07	0.235175928	2.70E-18	0.1324101	1.15E-06	0.074420706	0.006420751	0.15509253	1.15E-08	0.229812511	1.61E-17	-0.068584876	0.012031024	-0.022308527	0.414519812	0.06488745	0.017522451	0.043164168	0.114260504	-0.02804794	0.30490721	0.035396738	0.19534441	0.053935535	0.048386395	0.073966898	0.006752349	0.008839342	0.746485165	0.231136318	1.04E-17
MYL5	myosin, light chain 5, regulatory	4636	yellow	-0.421856195	5.95E-59	-0.231826498	8.28E-18	0.050900372	0.062500519	0.336696762	7.08E-37	0.421597837	7.11E-59	-0.126754247	3.25E-06	0.063180814	0.020725377	0.228897089	2.17E-17	0.273814391	1.80E-24	-0.128883471	2.21E-06	0.107507348	8.04E-05	0.16243963	2.22E-09	0.322369312	8.85E-34	0.175037091	1.11E-10	0.167000893	7.71E-10	0.161903785	2.51E-09	-0.117249152	1.69E-05	-0.156658438	8.17E-09	0.102036119	0.000182985
SOX11	SRY (sex determining region Y)-box 11	6664	yellow	-0.414051034	1.20E-56	-0.490832583	3.63E-82	0.050280094	0.065768263	0.416326553	2.59E-57	0.463039347	3.63E-72	0.162552837	2.17E-09	0.11866968	1.33E-05	0.487135404	8.80E-81	0.068361056	0.012313906	-0.125374637	4.16E-06	0.021957195	0.421909978	0.11170065	4.17E-05	0.025501808	0.35092326	-0.033973302	0.213932253	-0.016596379	0.543849535	-0.056531021	0.03853683	0.002858194	0.916749047	-0.091725649	0.00077474	-0.099963583	0.000247303
PROCA1	protein interacting with cyclin A1	147011	yellow	-0.067334303	0.013688398	-0.258196394	7.54E-22	0.050002966	0.06727303	-0.014333082	0.600129553	0.36506648	1.65E-43	0.172400585	2.12E-10	0.133690733	9.04E-07	0.247154678	4.24E-20	0.27084511	5.84E-24	0.20562437	2.93E-14	0.306866244	1.30E-30	0.136872713	4.92E-07	0.048693902	0.074768304	-0.033750224	0.216957134	0.041139364	0.132277861	0.019368126	0.478700226	-0.0506897	0.063595001	-0.088255929	0.001220717	0.21279176	3.48E-15
DYNLRB2	dynein, light chain, roadblock-type 2	83657	yellow	-0.208108731	1.41E-14	-0.446519919	1.20E-66	0.049107506	0.072329826	0.093736998	0.00059102	0.537859912	2.44E-101	0.296229531	1.51E-28	0.198478528	2.27E-13	0.440100902	1.39E-64	0.082785964	0.002422617	0.057624973	0.03492693	0.187561435	4.49E-12	0.235044298	2.82E-18	-0.076808362	0.004905414	-0.073542805	0.007076048	0.010941315	0.689041541	-0.118703363	1.32E-05	-0.010234836	0.70816874	-0.099628462	0.00025951	-0.032231207	0.238373827
RPL39	ribosomal protein L39	6170	yellow	-0.234259162	3.67E-18	-0.446564409	1.16E-66	0.047091376	0.084856941	-0.010419842	0.703141494	0.804125912	1.62E-304	0.465727983	4.29E-73	0.418568561	5.66E-58	0.433321396	1.89E-62	0.099450067	0.000266235	-0.04156035	0.128361301	0.030069874	0.271349723	0.483918493	1.36E-79	0.151953202	2.27E-08	0.129915251	1.83E-06	-0.064838343	0.017608178	-0.028569721	0.295994858	-0.014558784	0.594400618	-0.052326835	0.055492367	-0.014899099	0.585810035
UBTD2	ubiquitin domain containing 2	92181	yellow	-0.110943627	4.70E-05	-0.233853792	4.21E-18	0.046746416	0.087166435	0.040873628	0.134797287	0.258984677	5.61E-22	0.252511801	6.15E-21	0.128408502	2.41E-06	0.027646515	0.311883656	0.131310747	1.41E-06	0.189281785	2.84E-12	0.240203016	4.86E-19	0.238221433	9.59E-19	-0.122075729	7.42E-06	-0.00640008	0.814934395	-0.10299799	0.000158808	-0.166304817	9.08E-10	-0.071643188	0.008703259	-0.003836524	0.888415622	0.121677132	7.95E-06
RPL12	ribosomal protein L12	6136	yellow	-0.329817738	2.28E-35	-0.438070872	6.13E-64	0.044811046	0.101078705	0.002692795	0.921550633	0.79507046	7.62E-293	0.355488286	3.41E-41	0.337263078	5.30E-37	0.351586245	2.84E-40	0.141675708	1.91E-07	0.058992429	0.030823576	0.14879603	4.44E-08	0.492086092	1.22E-82	0.203942579	4.78E-14	0.124821215	4.59E-06	-0.005027727	0.854111971	-0.006270627	0.818611913	-0.048757618	0.074388342	-0.019915778	0.466350988	0.03184063	0.244113716
SDF2L1	stromal cell-derived factor 2-like 1	23753	yellow	-0.182049222	1.89E-11	-0.383825022	2.81E-48	0.044530285	0.103236175	0.091980941	0.000748792	0.568894427	9.37E-116	0.282076184	6.24E-26	0.354925622	4.64E-41	0.367876601	3.33E-44	0.099266278	0.000273334	0.034082812	0.212458492	0.198863173	2.04E-13	0.330584114	1.55E-35	-0.007504916	0.783721534	0.093147249	0.000640185	0.104610592	0.000124885	-0.037709419	0.167711739	-0.185686623	7.36E-12	-0.273092148	2.40E-24	-0.073207854	0.00734147
AKR7A3	aldo-keto reductase family 7, member A3 (aflatoxin aldehyde reductase)	22977	yellow	-0.325367002	2.05E-34	-0.501357537	3.36E-86	0.044398937	0.10425799	0.078001116	0.004276677	0.567715373	3.53E-115	0.144806654	1.02E-07	0.279752408	1.62E-25	0.46556231	4.89E-73	0.294769466	2.86E-28	-0.014223489	0.602920277	0.359111837	4.64E-42	0.174580218	1.24E-10	0.024456771	0.371020673	-0.101833405	0.000188503	0.114929023	2.47E-05	0.067438307	0.013543261	-0.102293661	0.000176193	-0.224874363	8.02E-17	0.052287331	0.05567725
LOC440311	glioma tumor suppressor candidate region gene 2 pseudogene	440311	yellow	0.094045585	0.000566716	-0.331828939	8.34E-36	0.044101418	0.106602178	-0.236483052	1.73E-18	0.659373115	5.70E-168	0.469587689	1.93E-74	0.449452901	1.32E-67	0.386096258	7.06E-49	0.203558703	5.34E-14	0.511146795	4.42E-90	0.55366419	1.72E-108	0.327121093	8.67E-35	0.018155214	0.506674645	0.012819321	0.639180044	-0.101089586	0.000210117	-0.189032806	3.03E-12	-0.200535721	1.27E-13	-0.139943254	2.70E-07	0.056843524	0.037474647
GPLD1	glycosylphosphatidylinositol specific phospholipase D1	2822	yellow	0.556505973	8.11E-110	0.37958685	3.57E-47	0.043195758	0.113995519	-0.204106674	4.55E-14	-0.3709181	5.80E-45	0.052400802	0.055147569	-0.183731461	1.23E-11	-0.117617793	1.59E-05	0.069501479	0.010931676	0.41757303	1.11E-57	0.104561006	0.000125818	-0.282532428	5.17E-26	-0.139937987	2.70E-07	-0.084892848	0.001868946	-0.204612151	3.93E-14	-0.177044329	6.73E-11	0.029547914	0.279760357	0.085012925	0.001841198	0.181612996	2.12E-11
STAB1	stabilin 1	23166	yellow	-0.200620502	1.24E-13	-0.275715661	8.37E-25	0.042435262	0.120510274	0.104158316	0.000133638	0.366726765	6.42E-44	0.056276639	0.039420232	0.15351953	1.62E-08	0.231972238	7.89E-18	0.35327342	1.14E-40	-0.090311895	0.000934167	0.128151972	2.52E-06	0.090902802	0.000864157	0.139145872	3.16E-07	-0.032177366	0.239159367	0.154649536	1.27E-08	0.186618977	5.76E-12	0.065463644	0.016543571	-0.034738688	0.203785012	0.243785993	1.40E-19
SIGLEC10	sialic acid binding Ig-like lectin 10	89790	yellow	-0.114812382	2.52E-05	-0.167465003	6.91E-10	0.042064255	0.1237924	0.024881769	0.362762829	0.382140291	7.75E-48	0.079427295	0.003621228	0.227712016	3.20E-17	0.105630746	0.000107084	0.449255951	1.54E-67	-0.109272095	6.12E-05	0.052410227	0.055103763	0.204712857	3.82E-14	0.250490339	1.28E-20	0.088398822	0.001198439	0.125170746	4.31E-06	0.254720569	2.74E-21	0.074521966	0.006348788	0.012829488	0.63891426	0.401517811	4.52E-53
LOC441268	hypothetical LOC441268	441268	yellow	0.200235493	1.38E-13	0.390811173	3.89E-50	0.041091637	0.132727654	0.067458501	0.013515238	-0.350195393	6.01E-40	-0.226697613	4.45E-17	-0.226792038	4.32E-17	-0.222086817	1.95E-16	0.200840217	1.16E-13	0.247192732	4.19E-20	0.169723309	4.04E-10	-0.174757295	1.19E-10	-0.056189985	0.03972505	0.039532593	0.148080347	-0.067910862	0.012900779	-0.073784618	0.006889813	-0.082051153	0.002648555	-0.013079269	0.63239862	0.24599803	6.40E-20
LOC100132364	hypothetical LOC100132364	100132364	yellow	-0.066423525	0.015019141	-0.295028154	2.55E-28	0.040111167	0.142231909	0.235110438	2.76E-18	0.323934231	4.14E-34	0.094768904	0.000513345	0.192603113	1.16E-12	0.209147564	1.04E-14	0.277083289	4.82E-25	0.118545225	1.36E-05	0.316359026	1.57E-32	0.067019974	0.014135418	0.028102232	0.303971668	-0.029798525	0.275700291	-0.018783894	0.492068657	-0.034725157	0.203961311	-0.13183866	1.28E-06	-0.199509609	1.70E-13	0.072633365	0.007817543
NKPD1	NTPase, KAP family P-loop domain containing 1	284353	yellow	0.149187615	4.09E-08	0.418399057	6.35E-58	0.039952873	0.143814106	0.06089023	0.02581812	-0.337574201	4.52E-37	-0.328750165	3.87E-35	-0.280321573	1.29E-25	-0.309564666	3.77E-31	0.115267245	2.34E-05	-0.213792439	2.57E-15	-0.230436282	1.31E-17	-0.163151545	1.89E-09	0.135828563	6.02E-07	0.078673547	0.003955305	0.040717565	0.136294081	0.140381708	2.47E-07	0.131143049	1.46E-06	0.051960563	0.05722629	0.229220804	1.96E-17
C17orf60	chromosome 17 open reading frame 60	284021	yellow	-0.247434108	3.84E-20	-0.294788917	2.83E-28	0.03947633	0.148658731	0.059249488	0.030100245	0.585920329	2.44E-124	0.156184204	9.07E-09	0.283120038	4.05E-26	0.287337679	6.92E-27	0.202804394	6.63E-14	-0.159943919	3.92E-09	0.007943367	0.771427485	0.3364461	8.05E-37	0.231658634	8.75E-18	0.146775467	6.77E-08	0.077056488	0.004768126	0.087703558	0.001310477	0.013101839	0.631811278	-0.026241853	0.337116437	0.081250098	0.002916653
C20orf108	chromosome 20 open reading frame 108	116151	yellow	0.24984165	1.62E-20	-0.152087692	2.21E-08	0.039226156	0.151251378	-0.047590511	0.081603028	0.23289433	5.80E-18	0.23832872	9.25E-19	0.16632956	9.03E-10	0.33224416	6.77E-36	0.11150447	4.30E-05	0.431984177	4.92E-62	0.41680765	1.87E-57	0.030884	0.258579708	-0.180306428	2.96E-11	-0.072106791	0.00827798	-0.159773223	4.08E-09	-0.23935564	6.50E-19	-0.188834954	3.20E-12	-0.173991268	1.43E-10	-0.016606844	0.543595531
NMB	neuromedin B	4828	yellow	-0.226163079	5.29E-17	-0.357376026	1.21E-41	0.038425435	0.159781041	-0.140903555	2.23E-07	0.535212066	3.54E-100	0.403634563	1.15E-53	0.438565224	4.28E-64	0.370195895	8.80E-45	0.150753007	2.94E-08	0.145032173	9.70E-08	0.267984644	1.79E-23	0.25373628	3.93E-21	0.06605571	0.015588027	0.029919628	0.273752791	-0.019948369	0.465621674	-0.101784958	0.000189844	-0.082296268	0.002571134	-0.110730854	4.86E-05	0.032049861	0.241026926
SMARCE1	SWI/SNF related, matrix associated, actin dependent regulator of chromatin, subfamily e, member 1	6605	yellow	-0.3061451	1.81E-30	-0.468275965	5.56E-74	0.037824598	0.166416439	-0.016730514	0.540598206	0.463023965	3.67E-72	0.562845018	7.99E-113	0.330568829	1.57E-35	0.175932736	8.88E-11	0.0518086	0.057958772	0.201891037	8.62E-14	0.147670182	5.62E-08	0.335828224	1.10E-36	-0.127688436	2.75E-06	-0.0438007	0.109013781	-0.003174169	0.907584757	-0.099586354	0.000261083	0.024207233	0.375923142	0.067628419	0.013281467	0.010795892	0.692963005
RPS23	ribosomal protein S23	6228	yellow	-0.23502535	2.84E-18	-0.476893072	4.91E-77	0.037762859	0.167109813	-0.134807736	7.32E-07	0.771951743	1.53E-265	0.443839227	8.86E-66	0.41758962	1.10E-57	0.345831376	6.15E-39	0.139005025	3.25E-07	-0.020161534	0.460867261	0.150316748	3.22E-08	0.44004842	1.45E-64	0.135985289	5.84E-07	0.040676547	0.136689601	0.00776357	0.776462189	0.02355043	0.38901656	0.105883404	0.00010306	0.068696783	0.011891756	-0.010185035	0.709524168
RPL36A	ribosomal protein L36a	6173	yellow	-0.140289172	2.52E-07	-0.300625895	2.17E-29	0.037026944	0.175542397	-0.081557396	0.00281101	0.629581773	7.47E-149	0.341304151	6.59E-38	0.281211198	8.92E-26	0.285160632	1.73E-26	0.041338432	0.130414495	-0.033217904	0.224299165	-0.020894721	0.444723049	0.310450545	2.50E-31	0.210450935	7.03E-15	0.098401548	0.00030918	-0.027354073	0.317031733	0.039719555	0.146170727	0.086494185	0.001528629	0.09924557	0.000274145	-0.050634902	0.063882264
MOCS3	molybdenum cofactor synthesis 3	27304	yellow	0.121219999	8.60E-06	0.33261662	5.61E-36	0.036609193	0.180468211	0.187316023	4.79E-12	-0.267044945	2.59E-23	-0.258999668	5.58E-22	-0.224447912	9.19E-17	-0.178328756	4.88E-11	0.156796091	7.92E-09	0.011136749	0.683784645	-0.049232864	0.071603731	-0.089310716	0.001064878	-0.000380293	0.988903366	0.072305767	0.008101221	0.018911307	0.489136242	0.036878148	0.177285277	-0.051769024	0.058150807	-0.0865547	0.001516964	0.24909944	2.12E-20
WBP5	WW domain binding protein 5	51186	yellow	-0.16705219	7.62E-10	0.022589313	0.408668898	0.035777329	0.19058107	-0.11358068	3.08E-05	0.285631549	1.42E-26	0.064317609	0.018540055	0.172672142	1.98E-10	0.073899381	0.006802977	-0.030614957	0.26275294	-0.132562561	1.12E-06	-0.058154573	0.03328556	0.348437355	1.54E-39	0.178758767	4.38E-11	0.248101032	3.03E-20	0.027373451	0.316688881	-0.006483744	0.812559813	-0.159279538	4.56E-09	-0.12140573	8.33E-06	-0.027157598	0.320521508
C1orf88	chromosome 1 open reading frame 88	128344	yellow	-0.282717913	4.79E-26	-0.469471795	2.12E-74	0.033630143	0.218598084	0.165326545	1.14E-09	0.472189487	2.34E-75	0.193678877	8.61E-13	0.170463336	3.38E-10	0.458340086	1.45E-70	0.147682338	5.61E-08	-0.050508021	0.064551517	0.167874328	6.27E-10	0.163588754	1.71E-09	-0.068509879	0.012125163	-0.089899603	0.000986084	0.049723512	0.068818978	-0.021318219	0.4355467	-0.018136168	0.507120672	-0.140593988	2.37E-07	0.038221223	0.162013481
RPL35	ribosomal protein L35	11224	yellow	-0.315723094	2.13E-32	-0.37136083	4.49E-45	0.033185971	0.224745174	0.067288963	0.013752098	0.776354784	1.73E-270	0.225725154	6.10E-17	0.309787253	3.40E-31	0.398904268	2.41E-52	0.131262096	1.43E-06	-0.109308535	6.08E-05	0.072597537	0.007848129	0.522448778	1.01E-94	0.220124616	3.62E-16	0.176830699	7.10E-11	0.054114084	0.047647005	0.04755055	0.081859762	-0.114305163	2.74E-05	-0.158708887	5.18E-09	0.015188803	0.578542695
PLCG2	phospholipase C, gamma 2 (phosphatidylinositol-specific)	5336	yellow	-0.218350874	6.31E-16	-0.428866973	4.48E-61	0.031727524	0.245793872	0.058502435	0.032243701	0.558144196	1.38E-110	0.272329151	3.24E-24	0.342194536	4.15E-38	0.394346523	4.30E-51	0.324558436	3.05E-34	0.000283615	0.991724232	0.193807344	8.32E-13	0.241998712	2.61E-19	0.079842084	0.003448521	0.012692992	0.642486643	0.058075456	0.033526496	0.065740276	0.016090895	0.001749635	0.948980235	-0.066257168	0.015274137	0.188718874	3.30E-12
EEF1DP3	eukaryotic translation elongation factor 1 delta pseudogene 3	196549	yellow	-0.010986869	0.68781487	-0.30053523	2.26E-29	0.031521351	0.248877305	-0.196065246	4.46E-13	0.280764173	1.07E-25	0.246023244	6.34E-20	0.199961913	1.49E-13	0.090504697	0.000910767	0.377782667	1.04E-46	0.31627488	1.64E-32	0.512169919	1.71E-90	0.023500508	0.390022955	-0.015210258	0.578006188	-0.199937829	1.50E-13	0.140472752	2.43E-07	0.070371372	0.009971786	0.209624734	9.00E-15	0.189465513	2.70E-12	0.231656486	8.76E-18
SFRS12IP1	SFRS12-interacting protein 1	285672	yellow	-0.355662611	3.10E-41	-0.322455445	8.49E-34	0.0291311	0.286602552	0.203069123	6.15E-14	0.317908538	7.54E-33	0.385206445	1.21E-48	0.124263006	5.06E-06	0.059001947	0.030796529	0.035524611	0.193734367	0.19675412	3.68E-13	0.106994323	8.70E-05	0.304888166	3.20E-30	-0.041297622	0.13079483	0.067933074	0.012871254	-0.138095088	3.88E-07	-0.223616018	1.20E-16	-0.051332515	0.060304117	0.074756259	0.006185053	0.024052491	0.37898321
UCK1	uridine-cytidine kinase 1	83549	yellow	-0.014086268	0.606422768	-0.135111092	6.90E-07	0.028787199	0.292332148	-0.094406105	0.000539501	0.256810679	1.26E-21	0.118756635	1.31E-05	0.106195663	9.83E-05	0.198221647	2.44E-13	0.276318222	6.57E-25	0.154103348	1.43E-08	0.232228488	7.24E-18	0.08134709	0.002882925	0.079400839	0.003632506	0.052867421	0.053013317	-0.302121965	1.11E-29	-0.147850257	5.42E-08	-0.181574902	2.14E-11	-0.155296788	1.10E-08	0.246976737	4.52E-20
MYO1F	myosin IF	4542	yellow	-0.162436304	2.23E-09	-0.371198423	4.93E-45	0.026609665	0.330385858	-0.00650513	0.811953109	0.614489249	6.07E-140	0.260043212	3.77E-22	0.417814272	9.45E-58	0.404632594	6.03E-54	0.257838894	8.62E-22	0.051360806	0.060162586	0.217415962	8.43E-16	0.264310465	7.43E-23	0.167855109	6.30E-10	0.071025951	0.009299705	0.068911063	0.011629066	0.078162099	0.004197656	-0.067379859	0.013624657	-0.114873127	2.50E-05	0.090062532	0.000965257
RPS9	ribosomal protein S9	6203	yellow	-0.077023164	0.00478636	-0.35170681	2.66E-40	0.025948242	0.342551974	-0.090372924	0.000926701	0.524753294	1.09E-95	0.347205789	2.97E-39	0.397166614	7.26E-52	0.334653181	2.01E-36	0.32440529	3.29E-34	0.291081699	1.41E-27	0.413424129	1.83E-56	0.182329284	1.76E-11	0.081441811	0.00285033	-0.017652603	0.518513405	-0.000481181	0.985959819	0.005023659	0.854228681	-0.084929919	0.001860339	-0.064794431	0.017685145	0.182955619	1.50E-11
ZNF236	zinc finger protein 236	7776	yellow	-0.147724167	5.56E-08	-0.179906674	3.27E-11	0.025653769	0.348059344	0.143928621	1.21E-07	0.283282596	3.79E-26	0.157313659	7.07E-09	0.041833405	0.125869527	0.150034445	3.42E-08	0.110795392	4.81E-05	0.4062303	2.13E-54	0.469865038	1.54E-74	0.177279145	6.35E-11	-0.050488551	0.064654723	0.04202273	0.12416404	-0.123966937	5.33E-06	-0.290914972	1.51E-27	-0.211358079	5.36E-15	-0.044171176	0.106048831	-0.001033751	0.969842196
PYGL	phosphorylase, glycogen, liver	5836	yellow	-0.377538408	1.21E-46	-0.476872307	4.99E-77	0.02481547	0.364043416	0.173922311	1.46E-10	0.511647811	2.78E-90	0.218413045	6.19E-16	0.202607542	7.02E-14	0.464341315	1.29E-72	0.11543508	2.28E-05	-0.149703011	3.67E-08	0.032258657	0.237974035	0.212328659	4.00E-15	0.041706667	0.127021354	-0.025448875	0.351924357	-0.004143589	0.879550262	-0.003213032	0.90645845	0.01983116	0.468247462	-0.084934942	0.001859176	0.022963915	0.400940017
RPS11	ribosomal protein S11	6205	yellow	-0.235538492	2.39E-18	-0.483655186	1.70E-79	0.024749053	0.36532911	-0.055526292	0.042126624	0.853051615	0	0.38485364	1.50E-48	0.442650279	2.14E-65	0.460149482	3.53E-71	0.14076011	2.30E-07	0.068023327	0.012751899	0.220194227	3.54E-16	0.505296609	9.55E-88	0.156818069	7.89E-09	0.101770325	0.000190251	0.057063236	0.036742847	0.000464565	0.9864446	-0.091126774	0.000838916	-0.08513747	0.001812816	-0.017506076	0.521991477
TPT1	tumor protein, translationally-controlled 1	7178	yellow	-0.396482074	1.12E-51	-0.556390589	9.19E-110	0.024582376	0.368568077	0.146972205	6.50E-08	0.750616248	4.60E-243	0.400723367	7.53E-53	0.399433924	1.72E-52	0.390202959	5.67E-50	0.146076649	7.82E-08	-0.10245096	0.000172162	0.094784778	0.000512228	0.419755255	2.52E-58	0.098668659	0.000297663	0.067746452	0.013121187	-0.014672923	0.591513	-0.030149412	0.27008343	-0.00034077	0.990056559	-0.052688968	0.053821253	-0.0223255	0.414164736
LOC100287064	hypothetical protein LOC100287064	100287064	yellow	-0.212103188	4.28E-15	-0.469390536	2.27E-74	0.023968505	0.380650437	-0.014549953	0.594624285	0.455790826	1.05E-69	0.372014107	3.07E-45	0.294296929	3.51E-28	0.225505658	6.54E-17	0.318046359	7.06E-33	0.274618778	1.30E-24	0.39613285	1.40E-51	0.135724074	6.14E-07	-0.003956598	0.8849472	-0.148401592	4.83E-08	0.124678652	4.70E-06	0.000830704	0.975763677	0.119468391	1.16E-05	0.126193883	3.59E-06	0.157217734	7.22E-09
ITGAM	integrin, alpha M (complement component 3 receptor 3 subunit)	3684	yellow	-0.173300699	1.70E-10	-0.301748844	1.31E-29	0.023827637	0.383456937	0.008681501	0.75086081	0.406419156	1.88E-54	0.158173796	5.84E-09	0.220786676	2.94E-16	0.164636582	1.34E-09	0.370764952	6.33E-45	-0.058253775	0.032985553	0.096194288	0.000421596	0.163924097	1.58E-09	0.184626067	9.71E-12	-0.01159946	0.67139957	0.091026241	0.00085016	0.207195279	1.85E-14	0.146082812	7.81E-08	0.113909962	2.92E-05	0.288488129	4.25E-27
RBKS	ribokinase	64080	yellow	0.212629496	3.65E-15	-0.183707695	1.23E-11	0.023658574	0.386841822	-0.194535398	6.81E-13	0.311668323	1.42E-31	0.369285752	1.49E-44	0.222219272	1.87E-16	0.321958894	1.08E-33	0.09571603	0.000450522	0.308773819	5.42E-31	0.212068163	4.33E-15	0.194914786	6.13E-13	-0.130570524	1.62E-06	-0.003361001	0.902171728	-0.188544274	3.45E-12	-0.236318539	1.83E-18	-0.1194149	1.17E-05	-0.082543372	0.002495182	0.097722656	0.000340353
ZNF521	zinc finger protein 521	25925	yellow	-0.096346465	0.000412761	-0.388580347	1.54E-49	0.023493726	0.390159817	-0.165016395	1.23E-09	0.498939073	2.92E-85	0.477099727	4.13E-77	0.293652963	4.64E-28	0.340391499	1.06E-37	0.112823621	3.48E-05	0.289015141	3.40E-27	0.201617481	9.32E-14	0.319455175	3.60E-33	-0.056083813	0.040101252	0.005425392	0.842717972	-0.203404608	5.58E-14	-0.154194351	1.40E-08	-0.114967167	2.46E-05	-0.008666879	0.751266558	0.083607838	0.002190881
ATE1	arginyltransferase 1	11101	yellow	-0.308031599	7.63E-31	-0.201374792	9.99E-14	0.023262751	0.394837724	0.139037699	3.23E-07	0.369264683	1.50E-44	0.079947472	0.00340585	0.068510302	0.01212463	0.105334709	0.000111986	-0.023727993	0.38544976	-0.219893233	3.90E-16	-0.069945012	0.010432463	0.34049977	1.00E-37	0.102374142	0.00017412	0.138915137	3.31E-07	-0.042035268	0.12405174	-0.095607556	0.000457336	-0.042544274	0.119558939	0.001161338	0.966122187	-0.003605143	0.895105162
LOC100134361	similar to hCG1811002	100134361	yellow	-0.16516723	1.18E-09	-0.30916023	4.54E-31	0.021745767	0.426394261	-0.123638135	5.65E-06	0.465035526	7.44E-73	0.410496775	1.29E-55	0.400664945	7.81E-53	0.14574479	8.38E-08	0.187444402	4.63E-12	0.267040103	2.59E-23	0.291228114	1.32E-27	0.265285361	5.11E-23	0.071865695	0.00849677	0.044521021	0.103307985	0.019540331	0.474797989	0.002200518	0.93585779	-0.000604212	0.982370456	0.029863965	0.274646764	0.094070718	0.000564778
RPS25	ribosomal protein S25	6230	yellow	-0.138000915	3.95E-07	-0.426546671	2.29E-60	0.021664428	0.428126786	-0.092313348	0.000716214	0.767237633	2.28E-260	0.475963321	1.06E-76	0.433872175	1.27E-62	0.420802784	1.23E-58	0.066888116	0.014326738	0.061485319	0.02440065	0.121251131	8.55E-06	0.422437557	3.98E-59	0.136154954	5.65E-07	0.079657406	0.003524469	0.009737826	0.721736665	-0.017620619	0.519271589	0.075004792	0.006015527	0.068436883	0.012217416	-0.077375243	0.00459686
C9orf103	chromosome 9 open reading frame 103	414328	yellow	-0.496378053	2.83E-84	-0.617842179	7.01E-142	0.021262198	0.436754276	0.356353501	2.12E-41	0.552079519	9.35E-108	0.293741466	4.47E-28	0.073363973	0.007216667	0.408922061	3.64E-55	0.081244618	0.00291857	0.024176068	0.376538218	0.079842662	0.003448285	0.250159284	1.44E-20	-0.0355387	0.193557574	-0.089996495	0.000973649	-0.118831466	1.29E-05	-0.115838467	2.13E-05	-0.009564052	0.726501521	-0.01391964	0.610687998	-0.002854671	0.916851268
FOLR2	folate receptor 2 (fetal)	2350	yellow	-0.276831475	5.34E-25	-0.303840842	5.13E-30	0.021147786	0.439226466	0.165216073	1.17E-09	0.483575998	1.82E-79	0.041663589	0.127414722	0.134214778	8.19E-07	0.310950784	1.98E-31	0.289452481	2.82E-27	-0.198702246	2.13E-13	-0.046052381	0.091966431	0.283073414	4.13E-26	0.202757587	6.72E-14	0.070968049	0.009357483	0.126078819	3.67E-06	0.238334137	9.23E-19	-0.012442514	0.649063651	-0.070868839	0.009457227	0.18662832	5.74E-12
RND2	Rho family GTPase 2	8153	yellow	0.019738956	0.470318799	-0.462100472	7.61E-72	0.020497903	0.453420377	-0.144672911	1.04E-07	0.609614291	3.63E-137	0.276507958	6.08E-25	0.366704971	6.50E-44	0.501035043	4.49E-86	0.247442932	3.83E-20	0.159095692	4.75E-09	0.399968488	1.22E-52	0.184905118	9.03E-12	0.018965035	0.487902511	-0.065915909	0.01580917	0.02339038	0.392248685	-0.013777426	0.614338786	-0.103561083	0.000146083	-0.165445186	1.11E-09	0.046334056	0.089993375
GKAP1	G kinase anchoring protein 1	80318	yellow	-0.118420258	1.39E-05	-0.337730664	4.17E-37	0.020390062	0.455800459	-0.200572932	1.26E-13	0.370396443	7.83E-45	0.393890395	5.72E-51	0.23135022	9.69E-18	0.205408118	3.12E-14	0.113354071	3.20E-05	0.093221758	0.000633771	0.135552268	6.35E-07	0.255966621	1.73E-21	-0.046348333	0.089894284	-0.062569887	0.021989975	-0.069775709	0.010620578	-0.068640568	0.011961536	0.116507595	1.91E-05	0.13580068	6.05E-07	0.092736245	0.000676668
PVR	poliovirus receptor	5817	yellow	0.301449252	1.50E-29	0.441166031	6.38E-65	0.020370364	0.456235959	-0.034601267	0.205580645	-0.350580622	4.89E-40	-0.217052026	9.44E-16	-0.213526971	2.78E-15	-0.200521846	1.27E-13	0.125126852	4.34E-06	0.326188669	1.37E-34	0.195632635	5.03E-13	-0.112327779	3.77E-05	-0.017523311	0.521581749	0.08563407	0.001703598	-0.044759638	0.10147104	-0.090963071	0.000857297	-0.135137513	6.87E-07	-0.041385025	0.129981319	0.211383395	5.32E-15
FUNDC2	FUN14 domain containing 2	65991	yellow	0.147618544	5.68E-08	-0.082142455	0.002619472	0.019146717	0.48374307	-0.161579363	2.71E-09	0.265002589	5.70E-23	0.106170776	9.87E-05	0.172777645	1.93E-10	0.16885122	4.97E-10	0.229452408	1.81E-17	0.075849136	0.005470379	0.14325707	1.39E-07	0.21765755	7.82E-16	0.07481719	0.006143099	0.117577124	1.60E-05	-0.169389242	4.38E-10	-0.081577213	0.002804319	-0.132898685	1.05E-06	-0.121411937	8.32E-06	0.142707844	1.55E-07
DLEU1	deleted in lymphocytic leukemia 1 (non-protein coding)	10301	yellow	-0.127229695	2.98E-06	-0.478339376	1.48E-77	0.017696072	0.517483911	-0.055829653	0.041014101	0.487433194	6.81E-81	0.441284684	5.84E-65	0.361155849	1.49E-42	0.314979924	3.02E-32	0.224873694	8.02E-17	0.170544887	3.32E-10	0.246452322	5.45E-20	0.201366513	1.00E-13	-0.065021745	0.017289878	-0.101014104	0.000212436	-0.004623248	0.865732429	-0.05282411	0.053208468	0.027091686	0.321697832	0.058088193	0.033487606	0.133413447	9.53E-07
GK	glycerol kinase	2710	yellow	0.403237745	1.49E-53	0.416579615	2.18E-57	0.017654506	0.518468314	-0.085776133	0.001673485	-0.339985028	1.31E-37	-0.08018634	0.003310907	-0.09186878	0.000760091	-0.020565495	0.451932168	-0.074126411	0.00663408	0.071380885	0.008952424	-0.106932241	8.78E-05	-0.181480843	2.19E-11	-0.084251634	0.002023731	0.09721955	0.000365324	-0.116629775	1.87E-05	-0.101987328	0.000184299	-0.008145441	0.765780433	-0.049720192	0.068837515	0.014317036	0.600537784
PSME1	proteasome (prosome, macropain) activator subunit 1 (PA28 alpha)	5720	yellow	-0.276704184	5.62E-25	-0.285698379	1.38E-26	0.016346348	0.549935947	0.051765445	0.058168199	0.421574235	7.22E-59	0.067823397	0.013017624	0.204710184	3.82E-14	0.310593604	2.34E-31	0.171869047	2.41E-10	-0.029077805	0.287485483	0.193648759	8.69E-13	0.276779539	5.45E-25	0.103260424	0.000152753	0.06251456	0.022107745	0.037038707	0.175405161	-0.050899564	0.062504685	-0.205159821	3.35E-14	-0.236710664	1.61E-18	0.06787555	0.01294784
SEMA3D	sema domain, immunoglobulin domain (Ig), short basic domain, secreted, (semaphorin) 3D	223117	yellow	-0.273251123	2.25E-24	-0.11354618	3.10E-05	0.015721355	0.565294976	0.157743394	6.42E-09	0.230439711	1.31E-17	-0.051803385	0.057984046	0.044803976	0.101132592	0.155976615	9.49E-09	0.004333106	0.874086109	-0.230016015	1.51E-17	-0.113389536	3.18E-05	0.149243435	4.05E-08	0.123339932	5.95E-06	0.070143718	0.010215462	-0.001888116	0.944948272	0.022050883	0.41993178	-0.070230981	0.010121438	-0.132269247	1.18E-06	0.038878786	0.154908174
GSTP1	glutathione S-transferase pi 1	2950	yellow	-0.153257472	1.72E-08	-0.42106834	1.02E-58	0.015687231	0.56613946	-0.132612168	1.11E-06	0.72652749	2.76E-220	0.437260295	1.11E-63	0.515418248	8.17E-92	0.598788109	3.58E-131	0.154663148	1.27E-08	0.175465034	9.98E-11	0.273628073	1.93E-24	0.426085267	3.16E-60	0.075700539	0.005562965	0.154088751	1.43E-08	-0.069022252	0.011494793	-0.130091737	1.77E-06	-0.280201208	1.35E-25	-0.314485922	3.81E-32	0.028446914	0.298076649
ZNF525	zinc finger protein 525	170958	yellow	-0.251488764	8.93E-21	-0.474953199	2.43E-76	0.015529121	0.570060149	-0.076913468	0.004846828	0.701333739	6.17E-199	0.398691523	2.76E-52	0.340273856	1.13E-37	0.298079711	6.70E-29	0.073738323	0.006925123	-0.125327126	4.19E-06	-0.036865854	0.177429843	0.425993548	3.37E-60	0.166998151	7.72E-10	0.026965258	0.323962037	0.182499066	1.69E-11	0.202840316	6.56E-14	0.307648027	9.09E-31	0.262577514	1.44E-22	-0.065322358	0.016779051
WDFY4	WDFY family member 4	57705	yellow	-0.281384149	8.31E-26	-0.326878834	9.77E-35	0.015511407	0.570500211	0.107815274	7.67E-05	0.556469401	8.44E-110	0.149361899	3.95E-08	0.304044341	4.68E-30	0.315120453	2.83E-32	0.239065492	7.18E-19	-0.056815234	0.03756977	0.074680119	0.006237842	0.258353899	7.11E-22	0.278431921	2.79E-25	0.13026765	1.71E-06	0.12153059	8.15E-06	0.131543089	1.35E-06	-0.018012229	0.510028081	-0.04622429	0.090758172	0.094907591	0.000503662
C9orf78	chromosome 9 open reading frame 78	51759	yellow	-0.218303632	6.40E-16	-0.112734734	3.53E-05	0.015068997	0.581542947	0.212958602	3.30E-15	0.287716664	5.90E-27	0.060483182	0.026828169	0.118947428	1.27E-05	0.197710523	2.82E-13	0.018081977	0.508390841	0.023619948	0.387617721	0.094433837	0.000537459	0.262750667	1.35E-22	0.106151018	9.90E-05	0.221021828	2.73E-16	-0.034729572	0.203903763	-0.171381598	2.71E-10	-0.21356605	2.75E-15	-0.16142078	2.81E-09	-0.065618423	0.016288936
SYDE2	synapse defective 1, Rho GTPase, homolog 2 (C. elegans)	84144	yellow	0.089872441	0.000989597	0.367446333	4.26E-44	0.013675937	0.61694998	0.348980284	1.15E-39	-0.371721085	3.64E-45	-0.27262522	2.88E-24	-0.27708806	4.81E-25	-0.164699477	1.32E-09	0.09320709	0.000635029	-0.122907313	6.42E-06	-0.227022337	4.01E-17	-0.221444273	2.39E-16	0.08703032	0.001428094	0.087949104	0.00126985	0.032727812	0.231214077	0.078109937	0.004223115	0.138516035	3.57E-07	0.098459335	0.000306654	0.135958452	5.87E-07
IRS1	insulin receptor substrate 1	3667	yellow	0.466888628	1.69E-73	0.402771593	2.01E-53	0.012821431	0.639124894	-0.287482079	6.51E-27	-0.362396798	7.43E-43	-0.032370566	0.236349043	-0.1683591	5.59E-10	-0.203939706	4.78E-14	0.025406056	0.352735493	0.189175927	2.92E-12	-0.024221766	0.37563653	-0.159468745	4.37E-09	-0.10239326	0.00017363	0.007004074	0.797831096	-0.17954325	3.59E-11	-0.116014638	2.07E-05	-0.007625226	0.780342543	0.055353345	0.042772218	0.190250248	2.19E-12
LOC100131744	hypothetical protein LOC100131744	100131744	yellow	0.158487233	5.44E-09	0.315146134	2.79E-32	0.012485899	0.647922499	0.127731813	2.72E-06	-0.373294997	1.46E-45	-0.22660316	4.59E-17	-0.196983591	3.45E-13	-0.233213595	5.21E-18	0.288981243	3.45E-27	-0.02713663	0.320895408	-0.105924656	0.000102417	-0.245475442	7.70E-20	0.046875951	0.086293335	-0.049754299	0.068647244	0.122293695	7.14E-06	0.255790296	1.84E-21	0.183560681	1.28E-11	0.159430795	4.40E-09	0.341285438	6.66E-38
KSR2	kinase suppressor of ras 2	283455	yellow	0.346808114	3.66E-39	0.594673694	5.92E-129	0.011977933	0.661334911	0.326229128	1.35E-34	-0.550868299	3.38E-107	-0.417134745	1.50E-57	-0.445772288	2.10E-66	-0.26832951	1.57E-23	-0.004361021	0.873281769	0.068408511	0.01225344	-0.197263538	3.19E-13	-0.259891968	3.99E-22	0.044908636	0.100337243	0.180418164	2.87E-11	-0.101546575	0.000196578	-0.058406378	0.032528566	-0.03264231	0.2324358	0.030690281	0.261579898	0.08626594	0.001573373
FLJ44635	TPT1-like protein	392490	yellow	-0.351348996	3.23E-40	-0.557922886	1.75E-110	0.011773181	0.666772399	0.087394389	0.001363335	0.633352943	3.71E-151	0.353151769	1.22E-40	0.338924208	2.26E-37	0.286222888	1.11E-26	0.099488402	0.000264776	-0.176680492	7.37E-11	0.011326338	0.678699511	0.29975992	3.19E-29	0.138957998	3.28E-07	-0.052266809	0.055773493	0.273213197	2.28E-24	0.214071624	2.36E-15	0.416604392	2.15E-57	0.319311014	3.86E-33	-0.129215535	2.08E-06
RPL38	ribosomal protein L38	6169	yellow	-0.147928764	5.33E-08	-0.201549429	9.51E-14	0.011738304	0.667700367	-0.038871301	0.154987699	0.641263438	4.27E-156	0.177647923	5.79E-11	0.309427355	4.01E-31	0.270781175	5.99E-24	0.114912116	2.48E-05	-0.160798531	3.23E-09	-0.077344115	0.004613336	0.421321069	8.60E-59	0.356269196	2.22E-41	0.223841908	1.12E-16	0.177639043	5.80E-11	0.248187979	2.93E-20	0.039351319	0.149949993	-0.003745169	0.891055918	0.006621851	0.808643807
RPS20	ribosomal protein S20	6224	yellow	-0.301555261	1.43E-29	-0.519996336	1.06E-93	0.011309856	0.679141018	0.043941433	0.107879865	0.832140309	0	0.436767613	1.58E-63	0.453960005	4.28E-69	0.500261101	8.98E-86	0.135938646	5.89E-07	-0.031476216	0.249555907	0.072992368	0.007516908	0.470505016	9.20E-75	0.180108748	3.11E-11	0.124677609	4.70E-06	-0.002996232	0.91274407	0.038608883	0.157795469	0.010865545	0.691083724	-0.028658385	0.29449791	-0.028878265	0.290807495
SLC39A14	solute carrier family 39 (zinc transporter), member 14	23516	yellow	0.515156743	1.05E-91	0.532440645	5.68E-99	0.010356368	0.704864845	-0.234008921	4.00E-18	-0.436883039	1.45E-63	-0.177265295	6.37E-11	-0.183144336	1.43E-11	-0.234889808	2.97E-18	-0.047009519	0.085400452	0.187420449	4.66E-12	0.027163061	0.320424138	-0.119694405	1.12E-05	-0.113914877	2.92E-05	0.076786498	0.004917681	0.011533226	0.673167054	-0.031917229	0.242980453	-0.053144165	0.051780412	-0.013704214	0.616221942	0.05422876	0.04717714
FAM120A	family with sequence similarity 120A	23196	yellow	-0.302736623	8.43E-30	-0.227907287	3.00E-17	0.0099022	0.717239469	0.173309502	1.70E-10	0.245364388	8.01E-20	0.086496142	0.00152825	0.164882854	1.27E-09	0.217160659	9.13E-16	0.054524761	0.045982292	0.077352917	0.004608672	0.266431466	3.28E-23	0.162757168	2.07E-09	-0.009273426	0.734494012	0.070714171	0.009614615	-0.070539978	0.009794662	-0.150557685	3.06E-08	-0.167241825	7.28E-10	-0.183859928	1.19E-11	-0.09101685	0.000851218
JUN	jun oncogene	3725	yellow	-0.230601077	1.24E-17	-0.173892284	1.47E-10	0.008962035	0.743089531	0.039027506	0.153334459	0.325829783	1.64E-34	0.132042005	1.23E-06	0.17221796	2.21E-10	0.151771179	2.37E-08	0.167213171	7.33E-10	0.20989717	8.30E-15	0.227497518	3.43E-17	0.275078158	1.08E-24	0.150876366	2.86E-08	0.153728991	1.55E-08	0.069249338	0.011224827	-0.038989677	0.153733602	-0.223473592	1.26E-16	-0.102889578	0.000161375	0.115842596	2.13E-05
TCEA3	transcription elongation factor A (SII), 3	6920	yellow	-0.189177134	2.92E-12	-0.229004936	2.10E-17	0.008947078	0.743503207	-0.099877363	0.000250391	0.453639846	5.47E-69	0.077586556	0.00448641	0.196792044	3.64E-13	0.370289451	8.33E-45	0.17841856	4.77E-11	-0.132913328	1.05E-06	0.023208138	0.395948723	0.263987934	8.41E-23	0.201089657	1.08E-13	0.115893651	2.11E-05	-0.028282621	0.300876935	0.069344043	0.01111391	-0.091493279	0.00079908	-0.123082294	6.23E-06	0.180118263	3.10E-11
OR2L3	olfactory receptor, family 2, subfamily L, member 3	391192	yellow	0.534536075	6.99E-100	0.568407764	1.62E-115	0.007112078	0.794782674	-0.140040652	2.65E-07	-0.517341882	1.33E-92	-0.146547596	7.10E-08	-0.17408358	1.40E-10	-0.26705166	2.58E-23	-0.070644959	0.009685797	0.295366309	2.20E-28	0.048879885	0.073663634	-0.217493324	8.23E-16	-0.148760552	4.48E-08	0.061762352	0.023764085	-0.118317706	1.41E-05	-0.130624721	1.60E-06	-0.087725187	0.001306851	0.022435945	0.411858617	0.005115592	0.85159172
POLR2C	polymerase (RNA) II (DNA directed) polypeptide C, 33kDa	5432	yellow	0.1170206	1.75E-05	0.259340724	4.91E-22	0.006791904	0.803828523	0.020202527	0.459956079	-0.212476715	3.82E-15	-0.092286869	0.00071876	-0.039540181	0.148002482	-0.088664667	0.001157987	0.037486395	0.170241328	-0.080513361	0.003184828	-0.205390612	3.14E-14	-0.022223027	0.416311197	0.026318084	0.335714309	0.196151832	4.35E-13	-0.091207897	0.000829943	-0.035571261	0.193149433	-0.083659949	0.002176895	-0.045197884	0.098165035	0.105151546	0.000115125
LOC100131943	RVLA1944	100131943	yellow	0.305776678	2.14E-30	0.326715215	1.06E-34	0.006637628	0.808196738	-0.114923254	2.48E-05	-0.385928115	7.82E-49	-0.073715867	0.00694231	-0.147960023	5.29E-08	-0.350433637	5.29E-40	0.115361937	2.30E-05	0.204551015	4.00E-14	0.060688393	0.026314778	-0.227049319	3.97E-17	-0.041007334	0.133525037	-0.053834237	0.048810145	0.097176144	0.000367557	0.169963627	3.81E-10	0.202740878	6.75E-14	0.271853132	3.92E-24	0.156661328	8.16E-09
CMIP	c-Maf-inducing protein	80790	yellow	0.063185794	0.020715334	0.59808242	8.65E-131	0.006543936	0.810852503	0.29327069	5.48E-28	-0.490664019	4.21E-82	-0.534202585	9.76E-100	-0.413802065	1.42E-56	-0.173986533	1.44E-10	-0.093270722	0.000629588	-0.220141004	3.60E-16	-0.377126036	1.54E-46	-0.307856859	8.26E-31	0.257889934	8.45E-22	0.242108116	2.51E-19	0.00090808	0.973506992	0.106997573	8.70E-05	-0.009534022	0.72732602	-0.034276658	0.209867737	-0.003939824	0.885431596
SCAND3	SCAN domain containing 3	114821	yellow	0.287006352	7.96E-27	0.378687026	6.10E-47	0.005712903	0.834500438	0.046664323	0.087723447	-0.390609739	4.41E-50	-0.164388319	1.42E-09	-0.294827248	2.79E-28	-0.264080627	8.12E-23	0.056585881	0.038348533	0.092059135	0.000741007	-0.098878342	0.000288905	-0.094381374	0.000541328	-0.104964648	0.000118413	0.054827875	0.044785216	-0.160410483	3.53E-09	-0.109361875	6.03E-05	-0.028817404	0.291825854	0.035097455	0.199150926	0.250283619	1.38E-20
C3	complement component 3	718	yellow	-0.293279574	5.46E-28	-0.40587983	2.68E-54	0.004416486	0.871683985	0.011667078	0.669597035	0.68451629	6.77E-186	0.187861426	4.14E-12	0.340208753	1.16E-37	0.316750308	1.31E-32	0.237789348	1.11E-18	-0.149484345	3.84E-08	0.046298209	0.090242566	0.418069608	7.95E-58	0.253937354	3.65E-21	0.140245448	2.54E-07	0.094136985	0.000559698	0.131201496	1.44E-06	0.032047096	0.241067548	0.001597061	0.953424045	0.093921165	0.000576401
DYNLT1	dynein, light chain, Tctex-type 1	6993	yellow	-0.312352656	1.03E-31	-0.609857313	2.64E-137	0.003887701	0.886937072	-0.15635769	8.73E-09	0.7064059	4.73E-203	0.635133523	2.95E-152	0.562155182	1.71E-112	0.53784993	2.47E-101	0.14611931	7.76E-08	0.262803019	1.32E-22	0.373564824	1.25E-45	0.369969799	1.00E-44	-0.10153684	0.000196858	-0.039795204	0.145403424	-0.158902807	4.96E-09	-0.202516295	7.21E-14	-0.160539371	3.43E-09	-0.181492253	2.18E-11	0.049239717	0.071564208
NCK2	NCK adaptor protein 2	8440	yellow	0.341013812	7.67E-38	0.405577822	3.26E-54	0.003736155	0.891316501	-0.118440795	1.38E-05	-0.376003144	2.98E-46	-0.089365037	0.001057374	-0.212480917	3.82E-15	-0.326870174	9.82E-35	0.180581788	2.76E-11	0.378071851	8.79E-47	0.190350882	2.13E-12	-0.16348604	1.75E-09	-0.031448818	0.249968479	-0.025449841	0.351906062	0.00239363	0.930242613	-0.010656517	0.69672911	0.082455201	0.002522045	0.17146807	2.65E-10	0.300640592	2.15E-29
EGLN1	egl nine homolog 1 (C. elegans)	54583	yellow	-0.256423411	1.46E-21	-0.134589649	7.63E-07	0.002959728	0.913802965	0.204911772	3.60E-14	0.331026006	1.25E-35	0.191440645	1.59E-12	0.177782708	5.60E-11	0.259812634	4.11E-22	-0.097339055	0.000359242	-0.068393953	0.012271962	-0.051892183	0.057554934	0.362696188	6.28E-43	-0.004494886	0.869426392	0.25742981	1.00E-21	-0.111271743	4.46E-05	-0.22359518	1.21E-16	-0.201845552	8.73E-14	-0.159409806	4.42E-09	-0.11567981	2.19E-05
CDK4	cyclin-dependent kinase 4	1019	yellow	-0.101571742	0.000195857	-0.424324498	1.08E-59	-0.00014075	0.995892908	-0.196947501	3.49E-13	0.505517032	7.81E-88	0.413843278	1.38E-56	0.430700798	1.22E-61	0.459699876	5.01E-71	0.213702802	2.64E-15	0.361381441	1.31E-42	0.458762462	1.04E-70	0.19117702	1.70E-12	-0.059241017	0.030123847	-0.066849685	0.014382928	-0.176026136	8.68E-11	-0.209391066	9.65E-15	-0.259945936	3.91E-22	-0.244413493	1.12E-19	0.150195833	3.31E-08
R3HDM2	R3H domain containing 2	22864	yellow	0.215354507	1.59E-15	0.346424475	4.49E-39	-0.000891344	0.973995086	-0.021930881	0.422466588	-0.280159537	1.37E-25	-0.234711814	3.16E-18	-0.208761554	1.16E-14	-0.256945735	1.20E-21	0.135478788	6.44E-07	-0.072073716	0.008307694	-0.195559108	5.13E-13	-0.100776691	0.000219887	0.182829549	1.55E-11	0.064641533	0.017955444	0.171580416	2.58E-10	0.240527493	4.34E-19	0.24381619	1.38E-19	0.266430117	3.28E-23	0.219004336	5.15E-16
RAPGEFL1	Rap guanine nucleotide exchange factor (GEF)-like 1	51195	yellow	0.163925205	1.58E-09	0.566331179	1.66E-114	-0.001033153	0.969859639	0.459048105	8.34E-71	-0.530100732	5.79E-98	-0.530523478	3.81E-98	-0.474384898	3.88E-76	-0.246038101	6.31E-20	0.051702622	0.058474196	-0.034877732	0.201979797	-0.230322707	1.36E-17	-0.36827093	2.66E-44	0.172880296	1.88E-10	0.160859387	3.19E-09	-0.042480172	0.120117633	0.081191824	0.00293709	-0.026621693	0.330167219	-0.020335611	0.45700486	0.101451806	0.000199316
LPAR6	lysophosphatidic acid receptor 6	10161	yellow	-0.216964657	9.70E-16	-0.448286389	3.19E-67	-0.001171652	0.96582151	-0.025344892	0.353896176	0.639680014	4.27E-155	0.353261712	1.15E-40	0.432309116	3.90E-62	0.541434821	6.36E-103	0.160883069	3.17E-09	0.044662795	0.102213405	0.166950663	7.80E-10	0.269111487	1.15E-23	0.103571343	0.00014586	0.063694573	0.019711413	-0.035031724	0.199994147	-0.04271368	0.118092238	-0.075700822	0.005562788	-0.12656597	3.36E-06	0.006712198	0.8060846
FAM70A	family with sequence similarity 70, member A	55026	yellow	-0.179376964	3.74E-11	-0.297903951	7.24E-29	-0.001213421	0.96460385	-0.086106841	0.00160527	0.313032184	7.53E-32	0.223631032	1.19E-16	0.193034207	1.03E-12	0.273247729	2.25E-24	0.13662313	5.16E-07	0.027234675	0.319149498	0.077247073	0.004665045	0.169774414	3.99E-10	0.016682966	0.541749616	-0.000175131	0.994889696	-0.0740909	0.006660247	-0.038175729	0.162514003	-0.012228155	0.654714105	0.004517445	0.868776988	0.112746596	3.53E-05
ALOX5AP	arachidonate 5-lipoxygenase-activating protein	241	yellow	-0.228151291	2.77E-17	-0.381400307	1.21E-47	-0.001782265	0.948030055	-0.018189858	0.505863887	0.615330962	1.99E-140	0.178870704	4.26E-11	0.343208228	2.44E-38	0.288611159	4.04E-27	0.249802282	1.64E-20	-0.134007618	8.52E-07	0.046768096	0.087019813	0.345746466	6.43E-39	0.230805975	1.16E-17	0.094144838	0.000559099	0.166522009	8.63E-10	0.217247283	8.88E-16	0.048492669	0.07597874	0.008099397	0.767066056	0.116899872	1.79E-05
GGTA1	glycoprotein, alpha-galactosyltransferase 1 pseudogene	2681	yellow	-0.308502921	6.14E-31	-0.452832048	1.01E-68	-0.001949602	0.9431585	0.212448887	3.86E-15	0.597422428	1.97E-130	0.249828775	1.63E-20	0.328649537	4.07E-35	0.491898485	1.44E-82	0.082006538	0.002662874	-0.184679107	9.58E-12	-0.065161017	0.017051545	0.290511901	1.80E-27	0.144665111	1.05E-07	0.095290393	0.000477812	0.012351355	0.651464135	0.025456057	0.351788423	0.010335388	0.705434811	-0.060008363	0.02804928	-0.082513496	0.002504255
ANAPC16	anaphase promoting complex subunit 16	119504	yellow	-0.015050129	0.582016098	-0.351786656	2.55E-40	-0.001971343	0.942525741	-0.088144345	0.001238379	0.368838766	1.92E-44	0.502599461	1.10E-86	0.249925064	1.57E-20	0.286639788	9.29E-27	0.014027711	0.60792015	0.32685648	9.88E-35	0.187334302	4.76E-12	0.245595393	7.38E-20	-0.166199334	9.31E-10	-0.029235297	0.284881616	-0.2226025	1.66E-16	-0.310909528	2.02E-31	-0.12715648	3.02E-06	-0.036666999	0.17978055	-0.008938648	0.743736392
PHLDA1	pleckstrin homology-like domain, family A, member 1	22822	yellow	-0.133385789	9.58E-07	-0.35451501	5.81E-41	-0.002484271	0.927608176	0.135346737	6.60E-07	0.367751196	3.58E-44	0.145999327	7.95E-08	0.19157425	1.53E-12	0.323669012	4.71E-34	0.197412309	3.06E-13	-0.132530793	1.13E-06	-0.028253857	0.301368989	0.057538402	0.035201696	0.112040615	3.95E-05	-0.069211029	0.011269971	0.036370738	0.183325483	0.104977366	0.000118186	0.049858345	0.068069475	-0.050631994	0.063897539	0.136798039	4.99E-07
DHRS4	dehydrogenase/reductase (SDR family) member 4	10901	yellow	-0.19439611	7.07E-13	-0.480685986	2.08E-78	-0.003185232	0.907264111	0.170758889	3.15E-10	0.497790706	8.12E-85	0.256975145	1.19E-21	0.334341956	2.35E-36	0.495915596	4.26E-84	0.239533529	6.12E-19	0.060684497	0.026324444	0.261656702	2.05E-22	0.168399367	5.54E-10	0.020383423	0.455947211	-0.018957053	0.48808569	-0.005766636	0.832966624	-0.012881026	0.637567563	-0.036617452	0.180369845	-0.130638517	1.60E-06	0.023117359	0.397799615
PFDN5	prefoldin subunit 5	5204	yellow	-0.200973227	1.12E-13	-0.369932695	1.02E-44	-0.003765113	0.890479393	-0.09471713	0.000517004	0.718900099	1.42E-213	0.238304748	9.32E-19	0.33410768	2.64E-36	0.362103021	8.75E-43	0.180385892	2.90E-11	-0.002778718	0.919055892	0.166985784	7.74E-10	0.481395005	1.15E-78	0.200215895	1.39E-13	0.168801474	5.03E-10	-0.042494577	0.11999191	-0.026064601	0.340391194	-0.136135952	5.67E-07	-0.096832822	0.000385671	0.061660712	0.023995941
HS6ST3	heparan sulfate 6-O-sulfotransferase 3	266722	yellow	0.225043743	7.59E-17	0.487505112	6.41E-81	-0.005390484	0.843716882	0.305480335	2.44E-30	-0.390336993	5.22E-50	-0.417382993	1.27E-57	-0.345273394	8.25E-39	-0.057168248	0.036397397	-0.076924108	0.004840934	-0.188633225	3.37E-12	-0.30367887	5.52E-30	-0.170443524	3.40E-10	0.086801889	0.00147016	0.19166966	1.49E-12	0.077450628	0.004557178	0.048423762	0.076396878	-0.01249252	0.647748392	-0.061064873	0.025394937	-0.008849194	0.74621233
BLNK	B-cell linker	29760	yellow	-0.250260284	1.39E-20	-0.316809912	1.27E-32	-0.005523177	0.839921158	0.017579303	0.520251808	0.498638064	3.82E-85	0.162809969	2.04E-09	0.263681588	9.46E-23	0.240606806	4.22E-19	0.274827862	1.20E-24	-0.158962216	4.89E-09	-0.020982279	0.44281686	0.303665648	5.55E-30	0.193529162	8.98E-13	0.101357846	0.000202067	0.125169328	4.31E-06	0.187928867	4.07E-12	0.110883577	4.75E-05	0.085619481	0.001706719	0.180209674	3.03E-11
TSR2	TSR2, 20S rRNA accumulation, homolog (S. cerevisiae)	90121	yellow	-0.140120554	2.61E-07	-0.04469747	0.101947103	-0.006797972	0.803656846	0.163743043	1.65E-09	0.220745321	2.98E-16	-0.072943997	0.007556801	0.118672519	1.33E-05	0.127219889	2.99E-06	0.030909036	0.258193707	-0.179712472	3.44E-11	-0.075048095	0.005986421	0.216240432	1.21E-15	0.194716756	6.48E-13	0.212166306	4.20E-15	0.010478188	0.701558717	-0.005227367	0.848387866	-0.083203647	0.002302184	-0.130760397	1.56E-06	-0.050216227	0.066112573
HLA-DPA1	major histocompatibility complex, class II, DP alpha 1	3113	yellow	-0.183517102	1.30E-11	-0.49889926	3.03E-85	-0.006944403	0.799516649	-0.109350406	6.04E-05	0.707655955	4.44E-204	0.42068991	1.33E-58	0.455655257	1.16E-69	0.45191162	2.05E-68	0.21369406	2.64E-15	0.094638664	0.000522596	0.194685266	6.53E-13	0.375414499	4.22E-46	0.065947551	0.015758877	0.020372149	0.456196473	0.023256128	0.394972341	0.023841135	0.383187483	-0.007198844	0.792335972	-0.036837486	0.177763781	0.066132554	0.015467635
ATF1	activating transcription factor 1	466	yellow	-0.036662241	0.179837082	-0.006210874	0.820310742	-0.008602388	0.75305698	-0.085947488	0.001637814	0.145439936	8.92E-08	0.124954559	4.48E-06	-0.008002167	0.769783021	0.027358003	0.316962176	0.082403293	0.002537982	0.244540487	1.07E-19	0.170417682	3.42E-10	0.297636783	8.15E-29	-0.001103125	0.967819414	0.122060238	7.44E-06	-0.087790063	0.00129603	-0.108381069	7.03E-05	-0.080432832	0.003215463	0.111162849	4.54E-05	0.139021714	3.24E-07
ADAL	adenosine deaminase-like	161823	yellow	0.24005131	5.12E-19	0.010091386	0.712075536	-0.008658837	0.751489749	-0.103034843	0.000157944	0.26488221	5.97E-23	0.19943439	1.73E-13	0.164899373	1.26E-09	0.317783615	8.00E-33	-0.060502416	0.026779684	0.103084514	0.000156787	-0.009310068	0.733484714	0.203475401	5.47E-14	0.047252839	0.08379307	0.177860723	5.49E-11	-0.108180328	7.25E-05	-0.200316408	1.35E-13	-0.098566127	0.000302036	-0.018684594	0.494360564	-0.058582197	0.032008783
RASAL3	RAS protein activator like 3	64926	yellow	-0.235081007	2.79E-18	-0.364534052	2.23E-43	-0.008942274	0.743636104	-0.02674218	0.327982388	0.644391761	4.33E-158	0.189677277	2.55E-12	0.362631171	6.51E-43	0.344480363	1.25E-38	0.222510525	1.71E-16	-0.04864643	0.075052425	0.094868481	0.000506376	0.380385191	2.22E-47	0.269846927	8.65E-24	0.161089031	3.03E-09	0.082159496	0.002614076	0.140412037	2.46E-07	-0.060344601	0.027179732	-0.076244683	0.005230659	0.092942166	0.000658155
POU6F1	POU class 6 homeobox 1	5463	yellow	0.4371948	1.16E-63	0.395885961	1.63E-51	-0.010525017	0.700289283	0.076491401	0.00508598	-0.444810709	4.30E-66	-0.182370564	1.74E-11	-0.2410872	3.58E-19	-0.165556591	1.08E-09	0.030319945	0.267382125	0.357803131	9.56E-42	0.146310172	7.46E-08	-0.304376169	4.03E-30	-0.062559848	0.022011305	-0.015112386	0.58045554	-0.044838859	0.100866946	-0.088675745	0.001156329	0.020768111	0.447487653	0.105758367	0.000105033	0.024532398	0.369542745
LOC100132705	similar to immunoglobulin superfamily, member 3	100132705	yellow	0.2448306	9.67E-20	0.338423255	2.92E-37	-0.011795148	0.66618819	-0.128560483	2.34E-06	-0.267298307	2.34E-23	-0.105160755	0.000114965	-0.090448987	0.000917472	-0.142038742	1.78E-07	0.286045716	1.19E-26	0.31439143	3.98E-32	0.16771976	6.51E-10	-0.097093192	0.000371859	0.08972178	0.00100929	0.0934218	0.000616842	-0.09080886	0.000874952	0.024838692	0.363594557	-0.103381253	0.000150039	0.049144519	0.072114815	0.387600307	2.82E-49
TIGD6	tigger transposable element derived 6	81789	yellow	-0.136616852	5.17E-07	-0.245761599	6.96E-20	-0.013288311	0.626967493	-0.096256868	0.000417942	0.289382826	2.91E-27	0.29291533	6.39E-28	0.231115194	1.05E-17	0.218356856	6.30E-16	0.210771871	6.39E-15	0.23776072	1.12E-18	0.249439949	1.87E-20	0.286612263	9.40E-27	-0.070244526	0.010106913	0.064527533	0.018159323	-0.147213332	6.18E-08	-0.127515334	2.83E-06	-0.134064807	8.43E-07	-0.037841775	0.166223912	0.221588368	2.28E-16
LOC100129781	hypothetical protein LOC100129781	100129781	yellow	-0.009756577	0.721223163	-0.227249441	3.72E-17	-0.013801197	0.613727894	0.192331004	1.24E-12	0.229475569	1.80E-17	0.081520416	0.002823536	0.160691308	3.31E-09	0.256906086	1.22E-21	0.266392899	3.33E-23	-0.037743128	0.167331863	0.018649477	0.495172447	0.0348946	0.201761603	0.078615596	0.003982113	-0.01614671	0.554819608	0.125890808	3.79E-06	0.153856577	1.51E-08	0.014007454	0.608438529	-0.028860399	0.291106204	0.159876838	3.98E-09
CTSS	cathepsin S	1520	yellow	-0.007933992	0.771689774	-0.133424283	9.51E-07	-0.013838432	0.612771528	-0.051692924	0.058521551	0.427847155	9.19E-61	0.200383606	1.33E-13	0.289689856	2.55E-27	0.372554038	2.25E-45	0.10405379	0.000135742	0.118309353	1.41E-05	0.122403107	7.01E-06	0.297102846	1.03E-28	0.126643958	3.31E-06	0.189909053	2.40E-12	-0.051487462	0.05953232	-0.093621261	0.000600383	-0.15727546	7.13E-09	-0.114598989	2.61E-05	0.027922509	0.307075906
PCOLCE	procollagen C-endopeptidase enhancer	5118	yellow	0.059878594	0.028391226	-0.205552873	2.99E-14	-0.014887157	0.5861105	-0.201566208	9.46E-14	0.249126666	2.10E-20	0.159791196	4.06E-09	0.183778517	1.21E-11	0.228276789	2.66E-17	0.416391088	2.48E-57	0.349437156	9.03E-40	0.424516917	9.43E-60	0.096007052	0.000432708	0.034489165	0.207053919	-0.059426024	0.029611981	-0.010122878	0.71121719	0.050550008	0.064329412	-0.064827553	0.017627063	-0.017162203	0.530200664	0.342579753	3.39E-38
A1BG	alpha-1-B glycoprotein	1	yellow	-0.492925393	5.88E-83	-0.4771211	4.06E-77	-0.015293208	0.575934068	0.109430719	5.97E-05	0.614605554	5.21E-140	0.27148927	4.53E-24	0.416106427	3.01E-57	0.244011656	1.29E-19	0.152300032	2.11E-08	-0.022797629	0.404360002	0.145546743	8.73E-08	0.37846154	6.98E-47	0.162390698	2.25E-09	0.08887615	0.001126711	0.122119791	7.36E-06	0.113299017	3.23E-05	-0.143958191	1.21E-07	-0.110560006	5.00E-05	0.060238437	0.027451738
ZNF37B	zinc finger protein 37B (pseudogene)	100129482	yellow	0.203004529	6.26E-14	0.247197541	4.18E-20	-0.015560665	0.569276917	0.05812183	0.033385093	-0.318012364	7.18E-33	0.009105976	0.739112171	-0.134705592	7.46E-07	-0.20419631	4.44E-14	0.060549749	0.026660694	0.417570796	1.12E-57	0.200810868	1.17E-13	-0.186259596	6.33E-12	-0.048757169	0.074391015	-0.008620675	0.752549168	-0.040088552	0.142457123	-0.037578269	0.169195836	0.134974207	7.09E-07	0.255747249	1.87E-21	0.04155507	0.128409856
KCTD10	potassium channel tetramerisation domain containing 10	83892	yellow	-0.086105627	0.001605516	0.159965103	3.90E-09	-0.017271904	0.52757472	0.210175931	7.63E-15	-0.192894995	1.07E-12	-0.1847679	9.36E-12	-0.105398386	0.000110914	0.01123561	0.681131202	0.004081867	0.88133107	-0.277344055	4.34E-25	-0.32643412	1.22E-34	-0.078916047	0.003844892	0.138753038	3.41E-07	0.169034519	4.76E-10	-0.001730171	0.949547057	0.096651757	0.000395556	0.123518875	5.77E-06	0.083011917	0.00235677	-0.010457239	0.702126852
TNFAIP1	tumor necrosis factor, alpha-induced protein 1 (endothelial)	7126	yellow	0.218398462	6.21E-16	0.421186052	9.43E-59	-0.01739636	0.524603595	-0.004268113	0.875959322	-0.339407169	1.76E-37	-0.336144794	9.39E-37	-0.171576051	2.59E-10	-0.167352948	7.10E-10	0.208342105	1.32E-14	-0.042166445	0.122881496	-0.11202073	3.96E-05	-0.155786496	9.90E-09	0.183357035	1.35E-11	0.154625153	1.28E-08	-0.098093721	0.000322968	0.084467348	0.001970394	-0.157722402	6.45E-09	-0.121886512	7.67E-06	0.273780177	1.82E-24
RNASEH2A	ribonuclease H2, subunit A	10535	yellow	-0.354281038	6.60E-41	-0.270226729	7.45E-24	-0.018499119	0.498656678	-0.018795243	0.491807074	0.409313718	2.81E-55	0.103929172	0.00013829	0.227049595	3.97E-17	0.068515168	0.012118503	0.260390621	3.31E-22	0.023683795	0.386335717	0.117666723	1.57E-05	0.365376932	1.38E-43	0.203820935	4.95E-14	0.122814694	6.52E-06	0.175705796	9.40E-11	0.265956821	3.94E-23	-0.055290777	0.043007826	0.003426975	0.900261379	0.212525349	3.77E-15
CD84	CD84 molecule	8832	yellow	-0.256819506	1.26E-21	-0.298085336	6.69E-29	-0.019517743	0.475308844	0.045815227	0.093654421	0.541240203	7.77E-103	0.107150209	8.49E-05	0.287739727	5.84E-27	0.291882977	9.97E-28	0.22826715	2.67E-17	-0.150475133	3.12E-08	0.003323496	0.903258003	0.36608289	9.27E-44	0.265325297	5.03E-23	0.168072301	5.99E-10	0.112971466	3.40E-05	0.134542716	7.69E-07	-0.01820291	0.505558611	-0.026960353	0.324050098	0.141248112	2.08E-07
KCNB1	potassium voltage-gated channel, Shab-related subfamily, member 1	3745	yellow	0.324177978	3.67E-34	0.649965815	1.06E-161	-0.020654877	0.449968458	0.378275159	7.80E-47	-0.581408625	5.15E-122	-0.406244461	2.11E-54	-0.396156472	1.38E-51	-0.159644729	4.20E-09	-0.080546939	0.003172133	0.011067606	0.685642752	-0.281366922	8.37E-26	-0.316741242	1.31E-32	0.093892548	0.000578651	0.209565381	9.16E-15	-0.095126418	0.00048873	-0.070561562	0.009772191	-0.058149506	0.033300947	-0.025386652	0.353103461	-0.010686161	0.695927461
LOC100133944	similar to IgGFc-binding protein precursor (FcgammaBP) (Fcgamma-binding protein antigen)	100133944	yellow	-0.261990701	1.80E-22	-0.409058488	3.33E-55	-0.02071829	0.448578207	0.102917095	0.00016072	0.565891082	2.72E-114	0.179829119	3.34E-11	0.291748225	1.06E-27	0.391848697	2.04E-50	0.154203173	1.40E-08	0.063793708	0.019520817	0.188628767	3.38E-12	0.309248935	4.36E-31	0.121101206	8.78E-06	0.081203721	0.002932908	0.124469647	4.88E-06	0.068872013	0.01167655	-0.047619248	0.081418812	-0.08863223	0.001162854	0.013298995	0.626690434
LOC344593	protein tyrosine phosphatase, non-receptor type 11 pseudogene	344593	yellow	-0.139027124	3.23E-07	-0.298339042	5.98E-29	-0.022280287	0.415110976	0.034116832	0.212002155	0.276528436	6.03E-25	0.288757644	3.79E-27	0.270965657	5.57E-24	0.257897487	8.43E-22	-0.04677685	0.086960666	-0.08144066	0.002850724	0.005298497	0.846350349	0.120113658	1.04E-05	0.007104158	0.795006121	-0.024887465	0.362652934	0.104127176	0.000134262	-0.014032875	0.60778803	0.234209275	3.74E-18	0.223358842	1.30E-16	-0.201739141	9.00E-14
RPS29	ribosomal protein S29	6235	yellow	-0.182968465	1.49E-11	-0.403121285	1.61E-53	-0.022418953	0.412212903	-0.096524515	0.000402644	0.780348257	4.51E-275	0.399561914	1.58E-52	0.45872716	1.07E-70	0.438129634	5.88E-64	0.1032062	0.000153986	0.030896789	0.258382486	0.062951952	0.021191496	0.485242865	4.43E-80	0.238263496	9.46E-19	0.171012463	2.96E-10	0.002005002	0.941546141	0.037362009	0.171664506	-0.035543433	0.193498204	0.001955187	0.942995934	0.003118169	0.909208082
PEA15	phosphoprotein enriched in astrocytes 15	8682	yellow	-0.481924981	7.35E-79	-0.317391723	9.64E-33	-0.024639572	0.367454608	0.112508611	3.66E-05	0.478662726	1.13E-77	0.133903679	8.69E-07	0.297655015	8.08E-29	0.384271118	2.14E-48	0.12821588	2.50E-06	-0.102377155	0.000174042	0.001043657	0.969553366	0.276866226	5.26E-25	0.258114876	7.77E-22	0.199580117	1.66E-13	-0.036982584	0.17606065	0.049677845	0.069074357	-0.217432577	8.39E-16	-0.208252282	1.35E-14	0.088326746	0.001209629
H3F3B	H3 histone, family 3B (H3.3B)	3021	yellow	-0.337386317	4.98E-37	-0.640478915	1.34E-155	-0.024708215	0.366121055	-0.222710904	1.60E-16	0.658411726	2.55E-167	0.592796207	5.95E-128	0.571591762	4.42E-117	0.393393225	7.80E-51	0.257281299	1.06E-21	0.400220834	1.04E-52	0.565932068	2.60E-114	0.33313708	4.32E-36	0.000851635	0.975153201	-0.082986751	0.002364022	-0.18572227	7.29E-12	-0.226824184	4.27E-17	-0.206351894	2.37E-14	-0.096968114	0.000378435	0.115419775	2.28E-05
RPS12	ribosomal protein S12	6206	yellow	-0.181943255	1.95E-11	-0.451816007	2.20E-68	-0.026276263	0.336483053	-0.156781149	7.95E-09	0.78648834	2.59E-282	0.485771775	2.82E-80	0.571534164	4.72E-117	0.478099663	1.80E-77	0.15869224	5.20E-09	0.099425404	0.000267178	0.168139434	5.89E-10	0.457391679	3.03E-70	0.195413967	5.34E-13	0.149124426	4.15E-08	-0.065374773	0.01669135	-0.011308317	0.679182242	-0.081117709	0.002963272	-0.052030173	0.056893337	0.007742433	0.777054708
PSMB10	proteasome (prosome, macropain) subunit, beta type, 10	5699	yellow	-0.282807359	4.61E-26	-0.415618097	4.18E-57	-0.027396208	0.316286579	0.268141337	1.69E-23	0.59576629	1.54E-129	0.10463387	0.00012445	0.311274423	1.71E-31	0.509776322	1.57E-89	0.074798964	0.006155621	-0.19666255	3.78E-13	-0.017114415	0.531346674	0.359665515	3.41E-42	0.169567024	4.19E-10	0.177930839	5.39E-11	0.129928125	1.82E-06	0.115383167	2.30E-05	-0.129038291	2.15E-06	-0.219234517	4.79E-16	-0.128737186	2.27E-06
H2AFV	H2A histone family, member V	94239	yellow	-0.094401989	0.000539805	-0.403951992	9.39E-54	-0.027450535	0.315327512	-0.21898786	5.17E-16	0.618637435	2.41E-142	0.529356223	1.21E-97	0.50405964	2.94E-87	0.494944755	1.00E-83	0.094280557	0.000548837	0.308922575	5.06E-31	0.366055792	9.41E-44	0.510644512	7.05E-90	-0.096424276	0.000408311	0.121955568	7.57E-06	-0.205189674	3.32E-14	-0.317959772	7.36E-33	-0.28654134	9.69E-27	-0.14587867	8.15E-08	0.000682898	0.980075022
CD33	CD33 molecule	945	yellow	-0.191886584	1.40E-12	-0.265812951	4.17E-23	-0.027521525	0.314077181	0.036368082	0.183357499	0.445111411	3.44E-66	0.09441113	0.00053913	0.258842014	5.92E-22	0.250269024	1.39E-20	0.428268821	6.83E-61	-0.071191935	0.009135832	0.045240981	0.09784462	0.260622994	3.03E-22	0.255040662	2.43E-21	0.114520738	2.64E-05	0.122749502	6.60E-06	0.241566516	3.03E-19	0.018964292	0.487919553	0.012484719	0.647953508	0.362210379	8.24E-43
TLR2	toll-like receptor 2	7097	yellow	-0.211278122	5.49E-15	-0.3267167	1.06E-34	-0.027922243	0.307080504	0.035939153	0.188581837	0.516716645	2.40E-92	0.166849747	7.99E-10	0.261634959	2.06E-22	0.300650883	2.14E-29	0.330205119	1.88E-35	-0.025293599	0.35487141	0.064516734	0.018178739	0.336554502	7.62E-37	0.189703616	2.53E-12	0.127618654	2.78E-06	0.038043495	0.163975462	0.102005808	0.0001838	-0.03941352	0.149306442	-0.024299352	0.374108724	0.265226402	5.23E-23
HERC4	hect domain and RLD 4	26091	yellow	-0.155637138	1.02E-08	0.189614385	2.59E-12	-0.02821291	0.302070396	0.230024076	1.50E-17	-0.225688061	6.17E-17	0.029072892	0.287566972	-0.055386023	0.042649598	-0.11211704	3.90E-05	-0.080110289	0.00334087	-0.115765361	2.16E-05	-0.297107767	1.03E-28	0.007694391	0.778401894	0.056495593	0.038658844	0.232638442	6.32E-18	-0.144686803	1.04E-07	-0.074095322	0.006656984	0.040325871	0.140107249	0.078506664	0.004032951	0.022400545	0.41259694
HSFY1	heat shock transcription factor, Y-linked 1	86614	yellow	0.103729618	0.000142465	0.245168233	8.58E-20	-0.028398498	0.298900062	0.133002371	1.03E-06	-0.228088505	2.83E-17	-0.173632779	1.57E-10	-0.129077761	2.13E-06	-0.067681071	0.013209756	0.136805825	4.98E-07	-0.031133097	0.254756972	-0.1498518	3.56E-08	-0.144680133	1.04E-07	0.132304192	1.17E-06	0.120465568	9.79E-06	-0.086023361	0.001622244	0.069997045	0.010375248	0.042882682	0.116643116	0.069371853	0.011081526	0.236320895	1.83E-18
UBE2O	ubiquitin-conjugating enzyme E2O	63893	yellow	0.289076582	3.31E-27	0.327875056	5.98E-35	-0.028461394	0.297830684	-0.053220746	0.051443508	-0.414249352	1.05E-56	-0.211202088	5.61E-15	-0.202314674	7.63E-14	-0.317532777	9.02E-33	0.233894858	4.15E-18	0.213914831	2.47E-15	0.075373515	0.005771716	-0.255172965	2.32E-21	0.018706597	0.493852233	-0.02357537	0.388514363	0.062179183	0.022833421	0.173528931	1.61E-10	0.158965589	4.89E-09	0.219432778	4.50E-16	0.281705246	7.28E-26
RPL37	ribosomal protein L37	6167	yellow	-0.268611084	1.40E-23	-0.448955837	1.93E-67	-0.029028267	0.288307809	-0.031343568	0.251557755	0.793807743	2.90E-291	0.338980951	2.19E-37	0.45969954	5.01E-71	0.441373336	5.47E-65	0.130332393	1.69E-06	-0.044557034	0.103029064	0.089775769	0.001002191	0.521548343	2.41E-94	0.232939124	5.72E-18	0.177072103	6.69E-11	0.056776692	0.037699691	0.09264602	0.000684931	-0.002397853	0.930119868	0.008603749	0.753019193	-0.019585655	0.473773822
TLR1	toll-like receptor 1	7096	yellow	-0.166988269	7.73E-10	-0.348954379	1.17E-39	-0.029382098	0.282468903	-0.034027543	0.213201369	0.470985476	6.23E-75	0.253414811	4.42E-21	0.3337303	3.20E-36	0.334346127	2.34E-36	0.272200671	3.41E-24	0.002359036	0.931248272	0.081936569	0.002685473	0.270412046	6.93E-24	0.117767906	1.55E-05	0.076793507	0.004913745	0.045574364	0.095394119	0.074093392	0.006658408	-0.005086225	0.852433898	0.008416899	0.758213958	0.213102493	3.16E-15
MEF2A	myocyte enhancer factor 2A	4205	yellow	0.365573648	1.24E-43	0.674520484	1.48E-178	-0.030494241	0.264640433	0.11286258	3.46E-05	-0.567128856	6.81E-115	-0.335217321	1.51E-36	-0.319206829	4.06E-33	-0.227455927	3.48E-17	-0.117100623	1.73E-05	0.097149145	0.000368952	-0.231737566	8.52E-18	-0.266238841	3.53E-23	0.083600596	0.002192831	0.224915595	7.91E-17	-0.093607483	0.000601506	-0.058490226	0.032279788	-0.074350472	0.006471095	0.029748986	0.276499655	-0.028118267	0.303695724
RPLP0P2	ribosomal protein, large, P0 pseudogene 2	113157	yellow	-0.240369346	4.58E-19	-0.266819973	2.82E-23	-0.031014544	0.256571408	-0.040825139	0.135260972	0.539377756	5.22E-102	0.195418125	5.33E-13	0.205368323	3.16E-14	0.234088783	3.89E-18	0.177273417	6.36E-11	0.061783595	0.023715872	0.055803146	0.041110309	0.366696275	6.54E-44	0.297753708	7.74E-29	0.181687465	2.08E-11	-0.087623193	0.001324033	0.094542045	0.000529558	-0.013498705	0.621521528	0.041464476	0.129245226	0.150149929	3.34E-08
LST1	leukocyte specific transcript 1	7940	yellow	-0.238383854	9.07E-19	-0.373230432	1.51E-45	-0.031300499	0.252210129	0.025245938	0.355779095	0.662904831	2.21E-170	0.167755808	6.45E-10	0.368122146	2.90E-44	0.382127357	7.81E-48	0.299628451	3.38E-29	-0.075066992	0.005973759	0.082749555	0.002433383	0.423997127	1.35E-59	0.270724647	6.12E-24	0.174339094	1.32E-10	0.081773195	0.002738922	0.123142155	6.16E-06	-0.094547664	0.000529151	-0.109109914	6.27E-05	0.212616196	3.67E-15
FLJ35024	hypothetical LOC401491	401491	yellow	-0.269276152	1.08E-23	-0.392067547	1.78E-50	-0.032465587	0.234975435	0.263315507	1.09E-22	0.329699751	2.42E-35	0.272907608	2.58E-24	0.200053428	1.46E-13	0.199096499	1.91E-13	0.201220116	1.04E-13	0.297329261	9.33E-29	0.302552706	9.16E-30	0.246900917	4.64E-20	-0.035972443	0.188172479	0.01620692	0.553344483	-0.018235636	0.504793605	-0.133312035	9.71E-07	-0.132774142	1.07E-06	0.000604106	0.982373543	0.116709834	1.84E-05
C1orf86	chromosome 1 open reading frame 86	199990	yellow	0.193253456	9.68E-13	0.009748156	0.721453769	-0.033605816	0.218931599	-0.264153755	7.89E-23	0.336935862	6.27E-37	0.12185643	7.71E-06	0.271019975	5.45E-24	0.260257305	3.48E-22	0.063297249	0.020491682	0.210383267	7.18E-15	0.118688539	1.32E-05	0.244988053	9.14E-20	0.170403367	3.43E-10	0.212523099	3.77E-15	0.061796204	0.023687297	0.035580175	0.19303781	-0.202697586	6.84E-14	-0.162229183	2.33E-09	0.042481039	0.120110065
CCNC	cyclin C	892	yellow	0.201226731	1.04E-13	0.497008776	1.62E-84	-0.033619338	0.218746173	0.228236375	2.70E-17	-0.450107563	8.07E-68	-0.279537267	1.77E-25	-0.313530813	5.96E-32	-0.174085677	1.40E-10	-0.2397165	5.74E-19	-0.058468395	0.032344404	-0.333795418	3.10E-36	-0.091512422	0.000797048	0.029666731	0.277830405	0.264994342	5.71E-23	-0.092038102	0.000743094	-0.097543481	0.000349058	0.011962587	0.661741831	0.08569245	0.001691164	-0.12737094	2.91E-06
ODZ4	odz, odd Oz/ten-m homolog 4 (Drosophila)	26011	yellow	0.304360666	4.06E-30	0.506293915	3.85E-88	-0.033645792	0.218383723	0.124373604	4.96E-06	-0.50903669	3.11E-89	-0.351173999	3.55E-40	-0.255107861	2.37E-21	-0.121721979	7.89E-06	-0.00878888	0.747883189	-0.027724891	0.310513355	-0.199007414	1.96E-13	-0.309222984	4.41E-31	0.035759148	0.190806656	0.126987695	3.12E-06	-0.013770137	0.614526148	0.036546129	0.181220644	0.018600438	0.496307394	-0.007500869	0.78383526	0.040387445	0.139502449
H3F3A	H3 histone, family 3A	3020	yellow	-0.109658674	5.76E-05	-0.456333014	6.88E-70	-0.033696064	0.217696152	-0.282001851	6.44E-26	0.583599521	3.87E-123	0.659670289	3.59E-168	0.566571436	1.27E-114	0.420902985	1.15E-58	0.156687555	8.12E-09	0.517034679	1.78E-92	0.505573202	7.43E-88	0.417241366	1.40E-57	-0.140006321	2.67E-07	0.000351782	0.98973524	-0.169646923	4.11E-10	-0.28405537	2.74E-26	-0.226412241	4.88E-17	-0.106571912	9.28E-05	0.078221358	0.004168903
C11orf1	chromosome 11 open reading frame 1	64776	yellow	-0.352346523	1.89E-40	-0.446885899	9.14E-67	-0.034553491	0.206207602	0.331558451	9.55E-36	0.515275242	9.35E-92	0.119571337	1.14E-05	0.129332247	2.04E-06	0.428900444	4.38E-61	0.02321511	0.39580677	-0.171033298	2.95E-10	-0.072105307	0.008279312	0.412726215	2.91E-56	0.030707404	0.261313742	0.128926274	2.19E-06	0.048004372	0.078982371	-0.024939587	0.361648358	-0.023318317	0.393709257	-0.030012399	0.27226728	-0.083618048	0.002188134
DENND1C	DENN/MADD domain containing 1C	79958	yellow	-0.279318619	1.94E-25	-0.395005841	2.84E-51	-0.036053106	0.187183309	0.283162782	3.98E-26	0.452921917	9.47E-69	0.081535318	0.002818482	0.203792081	4.99E-14	0.359263458	4.26E-42	0.190749894	1.91E-12	-0.087925366	0.001273727	0.004578711	0.867013791	0.243442745	1.57E-19	0.112712666	3.55E-05	0.088621205	0.001164513	0.089432774	0.001048084	0.122498953	6.89E-06	-0.068755342	0.01181945	-0.082934664	0.002379096	0.094525098	0.000530789
PFN2	profilin 2	5217	yellow	0.235402813	2.50E-18	0.629932082	4.58E-149	-0.036458267	0.182272807	0.210911923	6.12E-15	-0.595421302	2.35E-129	-0.500877513	5.17E-86	-0.410189021	1.58E-55	-0.364924909	1.79E-43	-0.181936973	1.95E-11	-0.388911463	1.26E-49	-0.565355631	4.94E-114	-0.180086415	3.13E-11	0.188720375	3.30E-12	0.222934245	1.49E-16	0.233282055	5.10E-18	0.326768551	1.03E-34	0.369227983	1.54E-44	0.342797889	3.03E-38	-0.123967549	5.33E-06
LOC100133109	hypothetical LOC100133109	100133109	yellow	-0.103706733	0.000142951	-0.429470831	2.93E-61	-0.037472824	0.170396178	-0.268852518	1.28E-23	0.591486912	2.95E-127	0.630000671	4.16E-149	0.567617031	3.94E-115	0.437279819	1.09E-63	0.15441325	1.34E-08	0.523777176	2.81E-95	0.515906278	5.16E-92	0.452579748	1.23E-68	-0.134569753	7.65E-07	0.03997732	0.143568877	-0.205555294	2.99E-14	-0.304686965	3.50E-30	-0.309944549	3.16E-31	-0.188466162	3.53E-12	0.084073761	0.002068703
DCTN5	dynactin 5 (p25)	84516	yellow	0.10675338	9.03E-05	0.374834167	5.93E-46	-0.037510898	0.169962027	0.232729712	6.13E-18	-0.384767537	1.58E-48	-0.368609194	2.19E-44	-0.227506522	3.42E-17	-0.079988211	0.003389485	-0.070119239	0.010241975	-0.253986399	3.59E-21	-0.329901341	2.19E-35	-0.14066196	2.34E-07	0.122666496	6.70E-06	0.213970576	2.43E-15	0.027956187	0.306492608	0.126273035	3.54E-06	0.085432969	0.001747077	0.075763246	0.005523723	-0.086865704	0.001458295
HLA-DRB4	major histocompatibility complex, class II, DR beta 4	3126	yellow	-0.152242993	2.14E-08	-0.407598545	8.70E-55	-0.037770749	0.167021089	-0.009423745	0.730356444	0.563155199	5.67E-113	0.262495597	1.49E-22	0.405853411	2.72E-54	0.455802745	1.04E-69	0.422952834	2.79E-59	0.166901386	7.89E-10	0.3183555	6.09E-33	0.284025224	2.78E-26	0.12860291	2.33E-06	0.050488587	0.064654533	0.068037563	0.012733162	0.089999553	0.000973259	-0.018729844	0.493315463	-0.040636142	0.137080074	0.255393459	2.14E-21
C6orf48	chromosome 6 open reading frame 48	50854	yellow	-0.260982423	2.64E-22	-0.590100081	1.59E-126	-0.039594229	0.147448708	-0.096098868	0.000427225	0.800839119	3.27E-300	0.573345386	5.97E-118	0.649982151	1.04E-161	0.506161192	4.34E-88	0.141424878	2.01E-07	0.22021755	3.52E-16	0.302638393	8.81E-30	0.401087723	5.96E-53	0.078894598	0.003854544	0.057474106	0.035406953	-0.071113999	0.009212454	-0.078788022	0.00390283	-0.110645529	4.93E-05	-0.081742544	0.002749057	-0.028337859	0.299933481
TMEM116	transmembrane protein 116	89894	yellow	-0.301811641	1.28E-29	-0.451676261	2.45E-68	-0.040287258	0.140487542	0.028346492	0.299786209	0.410346371	1.42E-55	0.330992495	1.27E-35	0.335681709	1.19E-36	0.343507113	2.09E-38	0.153926266	1.49E-08	0.224871003	8.03E-17	0.329075119	3.30E-35	0.251586618	8.62E-21	-0.085149833	0.001810021	0.011830129	0.665258286	-0.23278736	6.01E-18	-0.23773913	1.13E-18	-0.265687424	4.37E-23	-0.185363714	8.01E-12	0.096785717	0.00038822
ACRC	acidic repeat containing	93953	yellow	0.165250765	1.16E-09	0.252439761	6.32E-21	-0.040895622	0.134587366	0.154188864	1.40E-08	-0.303493549	6.00E-30	-0.014824494	0.587688344	-0.162040647	2.44E-09	-0.10622304	9.79E-05	0.134943514	7.13E-07	0.438532248	4.38E-64	0.082007325	0.002662621	-0.150238883	3.28E-08	-0.014647654	0.592151716	0.08214271	0.002619391	-0.203456508	5.50E-14	-0.11622998	2.00E-05	-0.143484922	1.33E-07	0.000692219	0.979803119	0.253918473	3.68E-21
FBXO15	F-box protein 15	201456	yellow	-0.354685458	5.29E-41	-0.409416286	2.63E-55	-0.040897068	0.134573576	0.164371544	1.43E-09	0.42207071	5.13E-59	0.181683914	2.08E-11	0.195854178	4.73E-13	0.34519239	8.61E-39	0.053976254	0.048216932	-0.00447857	0.869896149	0.064901936	0.017497233	0.270330678	7.15E-24	0.024702429	0.366233346	0.090488436	0.000912719	-0.076358013	0.005163746	-0.113824977	2.96E-05	-0.188375672	3.61E-12	-0.189346357	2.79E-12	0.033547383	0.219734197
RPL6	ribosomal protein L6	6128	yellow	-0.254761369	2.70E-21	-0.261299979	2.34E-22	-0.042241877	0.122212464	0.074610406	0.006286529	0.544737435	2.10E-104	0.100023712	0.000245171	0.198821144	2.06E-13	0.259707477	4.28E-22	0.157119362	7.38E-09	-0.06405677	0.019022838	0.026560878	0.331273574	0.461046647	1.74E-71	0.219417794	4.52E-16	0.274771896	1.22E-24	-0.200886617	1.15E-13	-0.081965143	0.002676223	-0.253745463	3.92E-21	-0.171648083	2.54E-10	0.104754394	0.000122217
SORD	sorbitol dehydrogenase	6652	yellow	-0.06679013	0.014470385	-0.173983372	1.44E-10	-0.04229014	0.121785905	-0.27343311	2.09E-24	0.385873532	8.09E-49	0.275715944	8.37E-25	0.348680978	1.35E-39	0.292515519	7.59E-28	0.022945021	0.40132773	0.055849098	0.040943644	0.047757723	0.080535843	0.398928056	2.37E-52	0.089759218	0.001004363	0.20452765	4.03E-14	-0.126480077	3.41E-06	-0.09821492	0.000317472	-0.190433236	2.08E-12	-0.136438187	5.35E-07	0.060809102	0.026016769
LMNB2	lamin B2	84823	yellow	0.261055676	2.57E-22	0.323318615	5.58E-34	-0.042744269	0.117828912	-0.064858455	0.017573024	-0.394785415	3.26E-51	-0.118911375	1.28E-05	-0.23704676	1.43E-18	-0.162328468	2.28E-09	0.054572275	0.045792884	0.212194307	4.16E-15	-0.113062144	3.35E-05	-0.267101796	2.53E-23	0.119651775	1.12E-05	0.027418401	0.315894557	0.063441352	0.020205635	0.157480899	6.81E-09	0.289318618	2.99E-27	0.422405027	4.07E-59	0.116190828	2.01E-05
LOC389033	placenta-specific 9 pseudogene	389033	yellow	-0.430418825	1.50E-61	-0.36608167	9.27E-44	-0.043255492	0.113495777	0.19537652	5.40E-13	0.444574132	5.13E-66	0.03391235	0.214755718	0.203264811	5.81E-14	0.318729563	5.10E-33	0.192241602	1.28E-12	-0.251987566	7.45E-21	-0.121124257	8.74E-06	0.210981023	6.00E-15	0.273190732	2.30E-24	0.084901299	0.001866981	0.344686682	1.12E-38	0.415992933	3.25E-57	0.135680838	6.19E-07	0.109056569	6.33E-05	0.07985622	0.003442769
RPL30	ribosomal protein L30	6156	yellow	-0.233911584	4.13E-18	-0.513125779	7.01E-91	-0.04435669	0.104588342	-0.182364987	1.75E-11	0.769511573	7.56E-263	0.539744103	3.59E-102	0.547782512	8.76E-106	0.458429584	1.35E-70	0.109785604	5.64E-05	0.121737647	7.87E-06	0.163682978	1.67E-09	0.487813687	4.92E-81	0.112354356	3.75E-05	0.098908934	0.000287648	-0.080262955	0.003280968	-0.049377612	0.070772758	-0.059694876	0.02888146	-0.01056988	0.699073939	0.007522721	0.783221191
RASA1	RAS p21 protein activator (GTPase activating protein) 1	5921	yellow	0.265681727	4.38E-23	0.671114792	4.03E-176	-0.045241883	0.097837929	-0.024655121	0.367152261	-0.512159182	1.73E-90	-0.282817769	4.59E-26	-0.258717497	6.20E-22	-0.293031792	6.07E-28	-0.179013045	4.11E-11	-0.07130888	0.009021926	-0.366741617	6.37E-44	-0.040804772	0.13545611	0.105574448	0.000108	0.349872286	7.15E-40	-0.169307198	4.46E-10	-0.063262957	0.02056027	-0.091052302	0.000847232	0.031681508	0.246479734	0.042345101	0.121301562
C16orf86	chromosome 16 open reading frame 86	388284	yellow	-0.077586393	0.004486494	-0.303786936	5.26E-30	-0.045783916	0.09387912	-0.083934156	0.00210464	0.361208427	1.44E-42	0.236361621	1.81E-18	0.258113074	7.78E-22	0.248940984	2.24E-20	0.385889199	8.01E-49	0.433223387	2.03E-62	0.476846258	5.10E-77	0.212558733	3.73E-15	0.048229939	0.077583073	0.008124659	0.766360623	-0.049981477	0.067390889	-0.052335875	0.055450132	-0.187624586	4.41E-12	-0.069461611	0.010977571	0.376927711	1.73E-46
LOC100127891	similar to hCG2042508	100127891	yellow	-0.313318833	6.58E-32	-0.480328778	2.81E-78	-0.047116793	0.08468875	0.107038768	8.64E-05	0.475603263	1.42E-76	0.236442124	1.76E-18	0.288732036	3.83E-27	0.454053069	3.98E-69	0.136575605	5.21E-07	-0.028179959	0.302635606	0.060176416	0.027611728	0.213161863	3.11E-15	0.009492411	0.728468988	-0.00624705	0.819282132	0.096400864	0.000409645	0.136448894	5.34E-07	-0.032147257	0.239599455	-0.048194453	0.077801867	0.029690078	0.277452256
MOSPD1	motile sperm domain containing 1	56180	yellow	0.272941643	2.54E-24	0.351945968	2.34E-40	-0.048293788	0.077190675	-0.169955751	3.82E-10	-0.305916444	2.00E-30	-0.229097118	2.04E-17	-0.185274348	8.20E-12	-0.164664946	1.33E-09	-0.116399195	1.94E-05	-0.116250389	1.99E-05	-0.250953236	1.08E-20	-0.077039108	0.004777628	0.106260153	9.73E-05	0.123142936	6.16E-06	0.12859942	2.33E-06	0.22876719	2.27E-17	0.172905551	1.87E-10	0.184600324	9.77E-12	-0.028913335	0.290221784
PHF19	PHD finger protein 19	26147	yellow	-0.034326292	0.209208072	-0.312567577	9.35E-32	-0.048326828	0.076988254	-0.007244638	0.791045448	0.436898201	1.44E-63	0.301681371	1.35E-29	0.368516684	2.31E-44	0.291663176	1.10E-27	0.21584093	1.37E-15	0.376369335	2.41E-46	0.392987	1.01E-50	0.270827889	5.88E-24	0.009391876	0.731232981	0.050674332	0.063675454	0.030551337	0.263746522	-0.016104907	0.555844892	-0.14820742	5.03E-08	-0.086372794	0.001552278	0.07956789	0.003561827
CCDC109A	coiled-coil domain containing 109A	90550	yellow	0.203009675	6.25E-14	0.312685671	8.85E-32	-0.049855529	0.068085063	-0.078071	0.004242209	-0.309581075	3.74E-31	-0.143154624	1.42E-07	-0.212067097	4.33E-15	-0.24306094	1.80E-19	-0.030865965	0.25885801	0.036544089	0.181245012	-0.155773404	9.93E-09	0.0178891	0.512925117	0.021731956	0.426688154	0.125604638	3.99E-06	0.005561417	0.838827974	0.036658835	0.179877549	0.06911184	0.011387608	0.165110378	1.20E-09	0.123278129	6.02E-06
FTL	ferritin, light polypeptide	2512	yellow	-0.416159552	2.90E-57	-0.577607065	4.39E-120	-0.050147443	0.066485048	0.099399066	0.000268188	0.700167293	5.30E-198	0.275048182	1.10E-24	0.446599292	1.13E-66	0.540882442	1.12E-102	0.102608927	0.000168201	-0.112691104	3.56E-05	0.115137858	2.39E-05	0.360687343	1.93E-42	0.154770613	1.24E-08	0.0476549	0.081190735	0.166209353	9.29E-10	0.144989859	9.78E-08	0.042933185	0.116212794	-0.037629388	0.168616202	-0.110959912	4.69E-05
SAMSN1	SAM domain, SH3 domain and nuclear localization signals 1	64092	yellow	-0.262419076	1.53E-22	-0.291379156	1.24E-27	-0.05034984	0.065393947	0.043991464	0.107479006	0.461283932	1.45E-71	0.115567724	2.23E-05	0.273512949	2.03E-24	0.266437905	3.27E-23	0.26986152	8.60E-24	-0.14001796	2.66E-07	-0.0376012	0.168935643	0.334153932	2.58E-36	0.243345969	1.63E-19	0.169021571	4.78E-10	0.048247229	0.077476657	0.124541617	4.82E-06	-0.053609597	0.049760968	-0.04046722	0.138721858	0.251703317	8.26E-21
RPS24	ribosomal protein S24	6229	yellow	-0.215649117	1.45E-15	-0.124855707	4.56E-06	-0.051932891	0.057359094	-0.036457655	0.182280149	0.55384515	1.42E-108	0.185920914	6.92E-12	0.254387134	3.10E-21	0.263426128	1.04E-22	0.043819587	0.108861057	-0.093995835	0.000570571	-0.157800089	6.34E-09	0.554842987	4.87E-109	0.302253023	1.05E-29	0.393991263	5.37E-51	-0.185645203	7.44E-12	-0.007690193	0.77851963	-0.173505618	1.62E-10	-0.062274929	0.02262417	0.076316904	0.005187928
FGL2	fibrinogen-like 2	10875	yellow	-0.189829041	2.45E-12	-0.386801337	4.59E-49	-0.052056178	0.056769367	-0.158531011	5.39E-09	0.566185257	1.96E-114	0.334330634	2.36E-36	0.315221863	2.69E-32	0.313573858	5.84E-32	0.16224135	2.33E-09	0.126341039	3.50E-06	0.114954904	2.46E-05	0.507865368	9.13E-89	0.09315987	0.000639095	0.154173665	1.41E-08	-0.065524866	0.016442437	-0.026353768	0.33505924	-0.081193896	0.002936362	0.043958378	0.107743964	0.129244933	2.07E-06
HBD	hemoglobin, delta	3045	yellow	-0.086976167	0.001437965	-0.383511114	3.39E-48	-0.053165564	0.051686084	-0.049736544	0.068746241	0.577574923	4.55E-120	0.300722452	2.08E-29	0.444775492	4.42E-66	0.551724886	1.36E-107	0.133534123	9.32E-07	0.088040423	0.00125504	0.165064445	1.21E-09	0.313340473	6.52E-32	0.05555388	0.042024405	0.05200973	0.05699095	0.009582133	0.726005242	0.00338549	0.901462564	-0.10217278	0.000179351	-0.119267178	1.20E-05	-0.018369822	0.501663261
SIGLEC11	sialic acid binding Ig-like lectin 11	114132	yellow	-0.331785147	8.52E-36	-0.298132677	6.55E-29	-0.053516477	0.050159637	0.132479655	1.14E-06	0.497929393	7.18E-85	0.048480489	0.076052516	0.250965575	1.08E-20	0.324296457	3.47E-34	0.316210007	1.69E-32	-0.113184459	3.29E-05	0.014085732	0.606436449	0.298934697	4.59E-29	0.346743011	3.79E-39	0.177092447	6.65E-11	0.127260047	2.97E-06	0.214764077	1.91E-15	-0.043873476	0.108426238	-0.04097018	0.133877631	0.240434014	4.48E-19
MAF	v-maf musculoaponeurotic fibrosarcoma oncogene homolog (avian)	4094	yellow	-0.127433229	2.87E-06	-0.246741447	4.91E-20	-0.05566462	0.041616205	-0.119466539	1.16E-05	0.394423614	4.09E-51	0.065367289	0.016703848	0.135260624	6.71E-07	0.200451529	1.30E-13	0.327277019	8.03E-35	0.016865502	0.537336001	0.047237446	0.083894024	0.308842013	5.26E-31	0.242556892	2.15E-19	0.078031382	0.004261718	0.072660883	0.007794124	0.320120719	2.62E-33	0.014045662	0.607460937	0.115299663	2.33E-05	0.261853088	1.90E-22
SPATA24	spermatogenesis associated 24	202051	yellow	-0.201666715	9.19E-14	-0.191813994	1.43E-12	-0.055820522	0.041047221	0.061769963	0.023746802	0.208757268	1.16E-14	-0.004767573	0.86158258	0.086855512	0.001460184	0.198355119	2.35E-13	0.260105215	3.68E-22	-0.076286732	0.005205741	0.011319304	0.678887932	0.129015019	2.16E-06	0.17639698	7.91E-11	0.092555914	0.000693276	0.083124792	0.002324493	0.153468372	1.64E-08	0.06780773	0.013038652	0.06032962	0.027217974	0.246710388	4.97E-20
RPL13AP20	ribosomal protein L13a pseudogene 20	387841	yellow	-0.283631487	3.27E-26	-0.548491602	4.16E-106	-0.057017017	0.036895771	-0.102698416	0.000165996	0.782739255	7.30E-278	0.330917422	1.32E-35	0.439126823	2.84E-64	0.399244162	1.94E-52	0.214197905	2.27E-15	0.204581206	3.97E-14	0.388709033	1.43E-49	0.512825973	9.27E-91	0.160155669	3.74E-09	0.075654464	0.005591959	0.086901304	0.001451715	0.037800402	0.166687923	-0.068117587	0.012628291	0.018340673	0.502342394	0.043831261	0.108766745
TRMT5	TRM5 tRNA methyltransferase 5 homolog (S. cerevisiae)	57570	yellow	-0.287209144	7.31E-27	-0.562000076	2.03E-112	-0.058060325	0.033572743	-0.197959239	2.63E-13	0.45752262	2.73E-70	0.585522181	3.93E-124	0.377581537	1.18E-46	0.303688383	5.50E-30	0.039985912	0.143482763	0.194440283	6.99E-13	0.134819802	7.30E-07	0.219075913	5.03E-16	-0.063155961	0.020775558	-0.152067186	2.22E-08	-0.008001379	0.769805041	0.018783752	0.492071923	0.286048112	1.19E-26	0.356223701	2.28E-41	-0.033406723	0.221674845
GRM7	glutamate receptor, metabotropic 7	2917	yellow	0.042965026	0.11594212	0.464710042	9.64E-73	-0.058761971	0.031484675	0.411274504	7.67E-56	-0.417096008	1.54E-57	-0.470170167	1.21E-74	-0.381916406	8.86E-48	-0.104208771	0.000132634	-0.040000067	0.143340985	-0.115900051	2.11E-05	-0.278913661	2.29E-25	-0.133800266	8.86E-07	0.107887203	7.58E-05	0.227376108	3.57E-17	-0.037613717	0.168793736	0.010865542	0.691083817	-0.118326034	1.41E-05	-0.078265285	0.004147704	0.074200091	0.006580082
LOC285741	tumor protein, translationally-controlled 1 pseudogene	285741	yellow	-0.352062776	2.20E-40	-0.532641635	4.65E-99	-0.059938098	0.028233988	0.032443607	0.235292673	0.535387895	2.97E-100	0.275494849	9.15E-25	0.302933318	7.72E-30	0.249047465	2.16E-20	0.071661848	0.008685772	-0.222022395	1.99E-16	-0.053603067	0.049788836	0.284127022	2.66E-26	0.169945287	3.83E-10	-0.029889687	0.274233401	0.315379841	2.50E-32	0.304801827	3.32E-30	0.459221769	7.28E-71	0.402343631	2.66E-53	-0.113878655	2.94E-05
SLC37A3	solute carrier family 37 (glycerol-3-phosphate transporter), member 3	84255	yellow	0.078666475	0.003958568	0.26406998	8.15E-23	-0.060160662	0.027652495	0.100653964	0.000223834	-0.351842374	2.48E-40	-0.23638852	1.79E-18	-0.216376682	1.16E-15	-0.169952804	3.82E-10	0.025872115	0.343970369	-0.055666016	0.04161108	-0.193105238	1.01E-12	-0.08391698	0.002109101	0.048620096	0.075210417	0.127246353	2.97E-06	-0.176155598	8.40E-11	-0.016492625	0.546371126	-0.065730594	0.016106552	0.034018033	0.213329386	0.158733761	5.15E-09
CPVL	carboxypeptidase, vitellogenic-like	54504	yellow	-0.334379794	2.30E-36	-0.4639134	1.82E-72	-0.060443833	0.026927591	0.091211747	0.00082952	0.446650433	1.09E-66	0.251072383	1.04E-20	0.236354343	1.81E-18	0.188020724	3.97E-12	0.301117949	1.74E-29	0.10266385	0.000166844	0.147702855	5.59E-08	0.407225134	1.11E-54	0.027816236	0.308921312	0.056069279	0.040152986	-0.042409576	0.120735295	-0.000655438	0.980876073	-0.07503444	0.005995585	0.040503451	0.138368455	0.293845998	4.27E-28
KBTBD6	kelch repeat and BTB (POZ) domain containing 6	89890	yellow	-0.006935685	0.799762974	0.320699193	1.98E-33	-0.061085035	0.025346469	0.212264068	4.08E-15	-0.329672034	2.45E-35	-0.195488402	5.23E-13	-0.230344041	1.35E-17	-0.089148674	0.001087559	-0.131901333	1.27E-06	-0.02154888	0.430595008	-0.260349192	3.36E-22	-0.02333595	0.393351577	0.044877627	0.10057237	0.275212064	1.03E-24	-0.174033181	1.42E-10	-0.112275491	3.80E-05	-0.039479433	0.148626782	0.069435058	0.011008234	-0.017683414	0.517783599
FGFBP3	fibroblast growth factor binding protein 3	143282	yellow	-0.214523446	2.05E-15	-0.259815775	4.11E-22	-0.061179129	0.025121332	-0.051796433	0.058017752	0.300856572	1.96E-29	0.13108215	1.47E-06	0.188515019	3.48E-12	0.24760864	3.61E-20	0.218064247	6.90E-16	0.163841855	1.61E-09	0.134104337	8.36E-07	0.190681538	1.95E-12	0.174069149	1.41E-10	0.05871835	0.031611165	0.100160024	0.000240401	0.088747107	0.001145701	-0.061129054	0.02524093	0.012384417	0.650593104	0.19995602	1.50E-13
DPY19L2P2	dpy-19-like 2 pseudogene 2 (C. elegans)	349152	yellow	0.162667323	2.11E-09	0.263804331	9.02E-23	-0.061632754	0.024060062	0.117902221	1.51E-05	-0.360414565	2.25E-42	-0.164746533	1.31E-09	-0.262359895	1.57E-22	-0.228203364	2.73E-17	0.008176074	0.764925456	-0.042497107	0.119969835	-0.244210105	1.20E-19	-0.141657979	1.92E-07	-0.000758414	0.977872236	0.027393013	0.316343043	0.094151046	0.000558626	0.162492305	2.20E-09	0.316982993	1.17E-32	0.355430969	3.52E-41	0.129314123	2.04E-06
SNTG1	syntrophin, gamma 1	54212	yellow	0.187522872	4.53E-12	0.399911465	1.27E-52	-0.062031696	0.023159037	0.366286012	8.25E-44	-0.420608915	1.40E-58	-0.300557731	2.23E-29	-0.275182048	1.04E-24	-0.084579866	0.001943088	-0.021067914	0.440957065	-0.008527324	0.75514261	-0.208731636	1.17E-14	-0.180046803	3.16E-11	0.04037284	0.139645717	0.134076146	8.41E-07	-0.023789331	0.384222285	0.004533566	0.868312963	-0.019863563	0.467520738	0.020622959	0.45066914	0.041496692	0.128947687
RNF216	ring finger protein 216	54476	yellow	-0.103893102	0.000139036	-0.083189081	0.00230629	-0.062462072	0.022219976	0.019972384	0.465084707	0.243849086	1.37E-19	0.108030652	7.42E-05	0.115384858	2.30E-05	0.114044407	2.86E-05	-0.026902658	0.325086989	0.176488491	7.74E-11	0.13124449	1.43E-06	0.386441517	5.72E-49	0.073043801	0.007474696	0.262566828	1.45E-22	-0.084292452	0.002013538	-0.168880467	4.94E-10	-0.19223423	1.28E-12	0.014133169	0.605224628	-0.014072796	0.606767115
RPL23A	ribosomal protein L23a	6147	yellow	-0.17762164	5.83E-11	-0.488833488	2.05E-81	-0.06263365	0.021854927	-0.141065081	2.16E-07	0.801021844	1.90E-300	0.484208516	1.07E-79	0.553797033	1.49E-108	0.555735135	1.86E-109	0.10903778	6.34E-05	0.114746947	2.55E-05	0.126780646	3.23E-06	0.494935749	1.01E-83	0.198630171	2.18E-13	0.167914536	6.21E-10	-0.04955723	0.069752607	-0.006862787	0.801823569	-0.074178386	0.006595948	-0.003319517	0.903373266	-0.018694993	0.494120285
ZFYVE27	zinc finger, FYVE domain containing 27	118813	yellow	0.142426463	1.65E-07	0.373319107	1.44E-45	-0.063451245	0.020186125	0.071973241	0.008398545	-0.298497023	5.57E-29	-0.348826045	1.25E-39	-0.207661692	1.61E-14	-0.189310772	2.81E-12	0.240766777	4.00E-19	-0.022623202	0.407966073	-0.135004143	7.05E-07	-0.110833687	4.78E-05	0.222293097	1.83E-16	0.177669475	5.76E-11	-0.020385018	0.455911939	0.166731288	8.22E-10	-0.088682166	0.001155369	-0.030739836	0.260810152	0.371142469	5.09E-45
INTS4L2	integrator complex subunit 4-like 2	644619	yellow	0.391458844	2.61E-50	0.470621233	8.37E-75	-0.06601795	0.015647489	-0.161209357	2.95E-09	-0.470181917	1.19E-74	-0.227614709	3.30E-17	-0.189430447	2.73E-12	-0.303931623	4.92E-30	0.074397854	0.006437093	0.129680333	1.91E-06	-0.068285519	0.012410695	-0.148775506	4.46E-08	0.044210676	0.105736514	0.085808514	0.00166669	-0.033872346	0.21529741	0.096959825	0.000378875	0.028656748	0.294525507	0.115357994	2.31E-05	0.245939079	6.53E-20
TTC3	tetratricopeptide repeat domain 3	7267	yellow	0.010260345	0.707474809	0.485209683	4.55E-80	-0.06635498	0.015123752	0.41218346	4.19E-56	-0.428232542	7.01E-61	-0.404018369	8.99E-54	-0.385230402	1.20E-48	-0.184655267	9.64E-12	-0.156845424	7.84E-09	-0.18309364	1.45E-11	-0.493362737	4.01E-83	-0.06852371	0.012107753	0.253239869	4.72E-21	0.37433722	7.93E-46	-0.118517413	1.36E-05	-0.021353552	0.434786073	-0.088644408	0.001161025	0.035574906	0.193103778	-0.006880734	0.801316126
RPS2	ribosomal protein S2	6187	yellow	-0.410847258	1.02E-55	-0.420134678	1.94E-58	-0.066880607	0.014337702	0.303514643	5.94E-30	0.638023918	4.68E-154	0.130941561	1.51E-06	0.287368557	6.83E-27	0.403177361	1.55E-53	0.158244269	5.74E-09	-0.007463081	0.784897445	0.02758424	0.31297529	0.423929457	1.42E-59	0.328338944	4.75E-35	0.237495981	1.23E-18	0.149418703	3.90E-08	0.118859712	1.29E-05	-0.175130694	1.08E-10	-0.118493591	1.37E-05	0.027024346	0.322902543
RIOK1	RIO kinase 1 (yeast)	83732	yellow	0.100137458	0.000241184	0.183705292	1.23E-11	-0.067706702	0.013174972	-0.037024536	0.175570498	-0.258441563	6.88E-22	-0.048760288	0.074372458	-0.068006093	0.012774614	-0.190683049	1.95E-12	-0.018467222	0.4993975	-0.023065541	0.398858476	-0.14874535	4.49E-08	0.017576941	0.520307877	0.018480556	0.49908775	0.10040036	0.000232201	0.082145048	0.00261865	0.114349515	2.72E-05	0.275241144	1.01E-24	0.324630867	2.94E-34	0.043344861	0.11275132
GTF2F2	general transcription factor IIF, polypeptide 2, 30kDa	2963	yellow	-0.389825676	7.16E-50	-0.408664287	4.31E-55	-0.068583572	0.012032655	0.127904344	2.64E-06	0.431122634	9.08E-62	0.375982384	3.02E-46	0.348821284	1.26E-39	0.47156726	3.88E-75	0.016209205	0.553288541	0.048088687	0.078456944	-0.039640751	0.146973324	0.277330848	4.36E-25	0.093599106	0.000602191	0.153374387	1.68E-08	-0.11843016	1.38E-05	-0.113654363	3.05E-05	-0.143730584	1.26E-07	-0.039171653	0.151820749	-0.012615499	0.644518472
PTAFR	platelet-activating factor receptor	5724	yellow	-0.046534931	0.088607201	-0.225999757	5.58E-17	-0.068845475	0.01170892	-0.072363126	0.008050896	0.417660606	1.05E-57	0.122263069	7.18E-06	0.324232259	3.58E-34	0.301602954	1.40E-29	0.337788827	4.05E-37	0.04779553	0.080296127	0.138926523	3.30E-07	0.248513659	2.61E-20	0.213641196	2.69E-15	0.11526304	2.34E-05	0.097474689	0.000352454	0.186565883	5.84E-12	-0.019350713	0.479095789	-0.000337055	0.990164938	0.242847091	1.94E-19
TRAF3IP3	TRAF3 interacting protein 3	80342	yellow	-0.200905857	1.14E-13	-0.31660318	1.40E-32	-0.069225778	0.011252571	-0.04259556	0.119113418	0.475797221	1.21E-76	0.169740978	4.02E-10	0.341222643	6.88E-38	0.305306015	2.64E-30	0.307635425	9.14E-31	-0.025981169	0.341939631	0.036503362	0.18173222	0.29200887	9.44E-28	0.237752998	1.13E-18	0.136560155	5.23E-07	0.074162383	0.006607667	0.170931249	3.02E-10	0.012210525	0.655179688	0.049276635	0.071351611	0.246229653	5.89E-20
IKZF5	IKAROS family zinc finger 5 (Pegasus)	64376	yellow	-0.180795141	2.61E-11	-0.169264302	4.51E-10	-0.070385904	0.009956408	-0.186567318	5.83E-12	0.354715007	5.21E-41	0.286621953	9.36E-27	0.357320467	1.25E-41	0.161507377	2.75E-09	-0.004057344	0.882038794	0.142542675	1.61E-07	0.099824932	0.000252287	0.511262982	3.97E-90	0.028550476	0.296320457	0.265136005	5.41E-23	-0.102027044	0.000183229	-0.149620774	3.74E-08	-0.208351948	1.31E-14	-0.002099382	0.938799856	0.041572755	0.128247277
ABHD13	abhydrolase domain containing 13	84945	yellow	0.321114972	1.62E-33	0.430209363	1.74E-61	-0.07077069	0.009556833	-0.023943914	0.38113945	-0.460855906	2.03E-71	-0.076611326	0.005016967	-0.189690483	2.54E-12	-0.171512461	2.63E-10	-0.052827658	0.053192461	0.224869267	8.03E-17	-0.102931563	0.000160376	-0.07145488	0.008881499	-0.069333261	0.011126489	0.160948512	3.13E-09	-0.208282265	1.34E-14	-0.140278627	2.53E-07	-0.096251763	0.000418239	0.085611529	0.001708422	0.120393098	9.91E-06
MCM3	minichromosome maintenance complex component 3	4172	yellow	-0.246204785	5.95E-20	-0.398743153	2.67E-52	-0.071313338	0.009017609	0.183012996	1.48E-11	0.452914171	9.53E-69	0.253135632	4.90E-21	0.198260552	2.41E-13	0.440811784	8.27E-65	0.045030726	0.099415742	0.187788802	4.22E-12	0.054236728	0.047144636	0.292515955	7.59E-28	0.057515137	0.035275847	0.120748486	9.33E-06	-0.21405536	2.37E-15	-0.141684774	1.91E-07	-0.237609184	1.18E-18	-0.116326479	1.97E-05	0.004001448	0.883652238
CCDC148	coiled-coil domain containing 148	130940	yellow	-0.511538695	3.07E-90	-0.452533591	1.27E-68	-0.072722975	0.007741512	0.250508846	1.27E-20	0.460080836	3.72E-71	0.124268895	5.06E-06	0.128745603	2.27E-06	0.300545057	2.25E-29	0.079624173	0.003538297	-0.099451669	0.000266174	-0.000651476	0.980991656	0.366409491	7.69E-44	0.09481905	0.000509824	0.134359055	7.97E-07	-0.082851983	0.002403206	-0.084949179	0.001855881	-0.120081675	1.05E-05	0.002407065	0.929852079	0.079235035	0.003703914
MGC16703	tubulin, alpha pseudogene	113691	yellow	-0.042590248	0.119159498	0.187918437	4.08E-12	-0.073641728	0.006999323	-0.01500925	0.583041856	-0.357082221	1.42E-41	-0.295877692	1.76E-28	-0.301750606	1.31E-29	-0.292871548	6.51E-28	0.168844368	4.98E-10	0.012345326	0.65162304	-0.074595927	0.006296684	-0.116901817	1.79E-05	0.130019059	1.79E-06	0.034751702	0.203615555	0.085746542	0.001679717	0.254083069	3.46E-21	0.188039386	3.95E-12	0.314478651	3.82E-32	0.277400755	4.24E-25
CD68	CD68 molecule	968	yellow	-0.254606492	2.86E-21	-0.372996457	1.74E-45	-0.074093242	0.006658519	0.051971307	0.057174792	0.577626462	4.29E-120	0.205072538	3.44E-14	0.369156587	1.60E-44	0.405138153	4.34E-54	0.244335762	1.15E-19	0.00172043	0.949830737	0.066557049	0.01481719	0.41557522	4.31E-57	0.210918119	6.11E-15	0.202743949	6.75E-14	0.044940121	0.100098958	0.069947084	0.01043018	-0.108704694	6.68E-05	-0.054112476	0.04765362	0.174958202	1.13E-10
KIF26B	kinesin family member 26B	55083	yellow	-0.049101154	0.072366775	0.042113336	0.123354245	-0.074204601	0.006576789	-0.101454623	0.000199235	0.150049181	3.41E-08	-0.0671841	0.013900428	-0.009296133	0.733868487	0.148978982	4.28E-08	0.029472651	0.280987562	0.020310245	0.457566555	-0.050656571	0.063768544	0.26958549	9.59E-24	0.22143328	2.40E-16	0.264349067	7.32E-23	-0.122434825	6.97E-06	-0.002873501	0.91630483	-0.142616523	1.58E-07	-0.017901656	0.512629289	0.113714819	3.02E-05
RNFT2	ring finger protein, transmembrane 2	84900	yellow	0.416194257	2.83E-57	0.52735468	8.62E-97	-0.075681893	0.005574682	0.171991758	2.34E-10	-0.426585748	2.23E-60	-0.398564473	2.99E-52	-0.171138736	2.87E-10	-9.25E-06	0.999729992	-0.122164377	7.31E-06	-0.070518863	0.009816689	-0.336403721	8.23E-37	-0.194018403	7.85E-13	0.154541561	1.30E-08	0.295429894	2.14E-28	0.023696368	0.386083556	0.070171072	0.010185905	-0.102363547	0.000174391	-0.10314296	0.000155436	-0.08060044	0.003152001
FBXO34	F-box protein 34	55030	yellow	0.060573463	0.026601252	0.407681071	8.24E-55	-0.07612479	0.005302299	0.233913888	4.12E-18	-0.49435234	1.69E-83	-0.497919194	7.24E-85	-0.458039105	1.83E-70	-0.40331905	1.41E-53	-0.017364658	0.525359607	-0.362500578	7.01E-43	-0.496649042	2.23E-84	-0.192910772	1.06E-12	0.226274223	5.11E-17	0.112291203	3.79E-05	0.304858147	3.24E-30	0.440069588	1.43E-64	0.449331377	1.45E-67	0.441696786	4.31E-65	0.085899272	0.00164778
LOC100286979	similar to anaphase promoting complex subunit 1	100286979	yellow	0.211398361	5.29E-15	0.381173034	1.38E-47	-0.076702598	0.004965011	0.255120182	2.36E-21	-0.387706666	2.64E-49	-0.218680196	5.69E-16	-0.192263375	1.27E-12	-0.090752136	0.000881531	-0.115016707	2.44E-05	-0.058312444	0.032809218	-0.317766138	8.07E-33	-0.089487261	0.001040666	0.015301673	0.57572281	0.242721129	2.03E-19	-0.109098277	6.28E-05	-0.047256725	0.083767599	-0.013231051	0.628453177	0.059585661	0.029176328	-0.00793419	0.771684228
OR2M1P	olfactory receptor, family 2, subfamily M, member 1 pseudogene	388762	yellow	0.294428617	3.31E-28	0.495349808	7.02E-84	-0.077811363	0.004371548	-0.013902096	0.611137842	-0.410568194	1.23E-55	-0.392365278	1.48E-50	-0.189173465	2.92E-12	-0.149570366	3.78E-08	0.01540186	0.573225243	-0.119638209	1.13E-05	-0.279648243	1.70E-25	-0.112219057	3.84E-05	0.166644437	8.39E-10	0.223991008	1.06E-16	0.090072806	0.000963957	0.272790962	2.70E-24	-0.014338566	0.599990045	0.041203378	0.131676424	0.13268594	1.09E-06
BGLAP	bone gamma-carboxyglutamate (gla) protein	632	yellow	0.017578733	0.520265357	-0.118333573	1.41E-05	-0.079288738	0.003680647	-0.106933226	8.78E-05	0.405112166	4.42E-54	0.154137692	1.42E-08	0.273438071	2.09E-24	0.305797082	2.12E-30	0.170611432	3.26E-10	0.336561079	7.59E-37	0.199573608	1.67E-13	0.443063153	1.57E-65	0.169906475	3.87E-10	0.262083682	1.74E-22	-0.054774377	0.044994564	-0.006493295	0.812288845	-0.392290676	1.55E-50	-0.221282928	2.52E-16	0.18361577	1.26E-11
LOC100287126	hypothetical protein LOC100287126	100287126	yellow	-0.10326874	0.000152565	-0.322172124	9.74E-34	-0.081755554	0.002744751	-0.160851252	3.20E-09	0.475116081	2.13E-76	0.296077685	1.61E-28	0.352509756	1.73E-40	0.464275663	1.36E-72	0.135699049	6.17E-07	0.367772207	3.54E-44	0.348880046	1.22E-39	0.334239355	2.47E-36	0.06258417	0.02195966	0.122794894	6.55E-06	-0.085901999	0.001647215	-0.094716004	0.000517084	-0.233115224	5.39E-18	-0.109164842	6.22E-05	0.075988504	0.005384808
FAM36A	family with sequence similarity 36, member A	116228	yellow	0.023148225	0.397169701	-0.225596867	6.35E-17	-0.082183059	0.002606631	-0.105702082	0.000105933	0.529846198	7.44E-98	0.298217242	6.31E-29	0.357012123	1.48E-41	0.535336803	3.13E-100	0.006854792	0.802049655	0.127638086	2.77E-06	0.029607634	0.278789197	0.408486232	4.85E-55	0.189674484	2.55E-12	0.292693581	7.03E-28	-0.268789102	1.31E-23	-0.179713769	3.44E-11	-0.264355337	7.31E-23	-0.145711843	8.43E-08	-0.030295149	0.267773737
FAM126B	family with sequence similarity 126, member B	285172	yellow	0.524730727	1.11E-95	0.651481869	1.07E-162	-0.083822769	0.002133722	-0.033091984	0.226061562	-0.601997106	6.32E-133	-0.31088194	2.05E-31	-0.25881296	5.98E-22	-0.16514675	1.19E-09	-0.09572409	0.00045002	0.125802608	3.85E-06	-0.249598652	1.77E-20	-0.212981945	3.28E-15	0.060385888	0.027074579	0.263526467	1.00E-22	-0.250175076	1.44E-20	-0.057518619	0.035264742	-0.129096565	2.13E-06	0.035977541	0.188109846	0.008740265	0.749230822
TLR6	toll-like receptor 6	10333	yellow	-0.153267318	1.71E-08	-0.246581426	5.20E-20	-0.084576257	0.001943958	-0.005616314	0.837259137	0.445521102	2.53E-66	0.130177771	1.74E-06	0.324706363	2.84E-34	0.311421564	1.60E-31	0.246676798	5.03E-20	0.017332668	0.526123041	0.060024711	0.028006455	0.380185358	2.50E-47	0.200259139	1.37E-13	0.223730766	1.16E-16	0.023905636	0.381901405	0.06397688	0.019172885	-0.140151881	2.59E-07	-0.037992311	0.164543804	0.251139458	1.01E-20
TRIM9	tripartite motif-containing 9	114088	yellow	0.221816667	2.13E-16	0.392942263	1.03E-50	-0.087169496	0.001403011	0.104799112	0.000121399	-0.535019265	4.30E-100	-0.242954599	1.87E-19	-0.246373264	5.60E-20	-0.204968748	3.55E-14	0.001398861	0.959198852	0.263933283	8.59E-23	0.050404779	0.065100335	-0.204033167	4.65E-14	-0.101216945	0.000206259	0.103556215	0.000146189	-0.133604349	9.19E-07	-0.099303541	0.000271881	-0.043692279	0.109893758	0.115357571	2.31E-05	0.053936749	0.048381333
WFIKKN2	WAP, follistatin/kazal, immunoglobulin, kunitz and netrin domain containing 2	124857	yellow	-0.08361083	0.002190075	-0.197969173	2.62E-13	-0.088140359	0.001239014	-0.175713051	9.38E-11	0.215590402	1.48E-15	0.146871264	6.64E-08	0.169854626	3.91E-10	0.065388268	0.016668835	0.310456435	2.50E-31	0.219931673	3.85E-16	0.159396424	4.44E-09	0.231906202	8.06E-18	0.073149383	0.007388708	0.040568544	0.137735273	0.070350968	0.009993413	0.134318736	8.03E-07	-0.00790859	0.772400584	0.113987055	2.89E-05	0.363241718	4.62E-43
CHORDC1	cysteine and histidine-rich domain (CHORD)-containing 1	26973	yellow	0.166804866	8.07E-10	0.249931577	1.57E-20	-0.090348184	0.000929721	-0.08087011	0.003052286	-0.343689832	1.90E-38	-0.041290608	0.130860285	-0.02396861	0.380648357	-0.04750058	0.082181714	-0.071860789	0.008501276	-0.090560399	0.000904108	-0.307771438	8.59E-31	-0.154062062	1.44E-08	0.050896987	0.062517978	0.177861075	5.49E-11	-0.102472775	0.00017161	0.019805811	0.468816404	0.125766452	3.88E-06	0.20166072	9.21E-14	-0.00969178	0.72299821
BMS1	BMS1 homolog, ribosome assembly protein (yeast)	9790	yellow	0.27276115	2.73E-24	0.270196673	7.54E-24	-0.090927478	0.000861342	-0.043528345	0.111234936	-0.272297062	3.29E-24	-0.060723383	0.026228091	-0.11509243	2.41E-05	-0.12168091	7.94E-06	-0.117299059	1.67E-05	0.192416977	1.22E-12	-0.041446002	0.1294161	0.072508576	0.007924537	-0.096682761	0.000393847	0.18392764	1.16E-11	-0.149764004	3.62E-08	-0.134525109	7.72E-07	-0.072991631	0.007517515	0.084759505	0.00190021	-0.032078317	0.240609248
TRIM22	tripartite motif-containing 22	10346	yellow	-0.242283286	2.36E-19	-0.297170589	1.00E-28	-0.090938665	0.000860069	-0.01663921	0.542810293	0.320305561	2.40E-33	0.086132302	0.001600126	0.287703841	5.93E-27	0.29562116	1.97E-28	0.273206335	2.29E-24	-0.100491518	0.00022916	0.004885661	0.858189973	0.164518298	1.38E-09	0.21597346	1.32E-15	0.071595562	0.008748034	0.171475221	2.65E-10	0.252785989	5.57E-21	0.092985779	0.000654294	0.0914715	0.000801397	0.240268139	4.75E-19
C8orf68	chromosome 8 open reading frame 68	619343	yellow	0.080028905	0.003373208	0.389854708	7.04E-50	-0.091270861	0.00082304	0.387373967	3.24E-49	-0.411335704	7.36E-56	-0.378733677	5.94E-47	-0.266682585	2.98E-23	-0.146780794	6.77E-08	0.121165278	8.68E-06	0.023956148	0.380896115	-0.182891752	1.52E-11	-0.163350455	1.80E-09	0.101968298	0.000184814	0.171951139	2.36E-10	0.066865817	0.014359318	0.095585428	0.000458737	-0.070282386	0.010066412	0.017520396	0.521651044	0.23328444	5.09E-18
LILRB4	leukocyte immunoglobulin-like receptor, subfamily B (with TM and ITIM domains), member 4	11006	yellow	-0.150449443	3.13E-08	-0.238099275	1.00E-18	-0.092417922	0.00070624	-0.018450106	0.499795259	0.367820391	3.44E-44	0.055956774	0.040555353	0.274946498	1.14E-24	0.239285364	6.66E-19	0.415268132	5.30E-57	-0.024545094	0.36929501	0.065127607	0.017108454	0.249214927	2.03E-20	0.295627344	1.97E-28	0.152396188	2.07E-08	0.132751071	1.08E-06	0.241070436	3.60E-19	-0.017421622	0.524001575	0.028993883	0.28887951	0.382605534	5.86E-48
KIAA1609	KIAA1609	57707	yellow	0.050939675	0.062298064	0.234012652	3.99E-18	-0.09356669	0.000604845	0.24045844	4.45E-19	-0.351851553	2.46E-40	-0.198109797	2.52E-13	-0.174015302	1.43E-10	-0.077011616	0.004792694	-0.028955338	0.289521319	0.21484014	1.86E-15	-0.089887179	0.00098769	-0.141954919	1.81E-07	0.035509524	0.193923819	0.206767532	2.10E-14	-0.158106002	5.92E-09	-0.107733689	7.77E-05	-0.234825171	3.04E-18	-0.045902936	0.093027262	0.067299673	0.013737028
STRN3	striatin, calmodulin binding protein 3	29966	yellow	0.096409357	0.000409161	0.349020943	1.13E-39	-0.094570498	0.000527499	-0.029847359	0.274913833	-0.385547845	9.86E-49	-0.100117454	0.000241881	-0.131399346	1.39E-06	-0.091125024	0.00083911	-0.126924056	3.15E-06	0.09769896	0.000341493	-0.161142671	2.99E-09	-0.047384366	0.08293444	0.028496523	0.297234512	0.269668918	9.28E-24	-0.247438536	3.83E-20	-0.127858722	2.66E-06	-0.070206705	0.010147517	0.130267427	1.71E-06	-0.047949718	0.079324481
GTF2H1	general transcription factor IIH, polypeptide 1, 62kDa	2965	yellow	0.044137524	0.106315484	0.304164686	4.43E-30	-0.095447507	0.000467564	0.12602174	3.70E-06	-0.244791061	9.80E-20	-0.290139329	2.11E-27	-0.1718271	2.43E-10	-0.153257031	1.72E-08	0.058110935	0.033418267	-0.254661958	2.80E-21	-0.415820261	3.65E-57	0.055581409	0.041922616	0.237371334	1.28E-18	0.294217751	3.63E-28	-0.05642033	0.038919142	0.160685444	3.32E-09	0.041095834	0.132688045	0.089074062	0.001098151	0.181149661	2.38E-11
EML6	echinoderm microtubule associated protein like 6	400954	yellow	0.271853165	3.92E-24	0.459100182	8.01E-71	-0.096997935	0.000376858	0.012253523	0.654044373	-0.485360224	4.01E-80	-0.382349148	6.83E-48	-0.383109843	4.32E-48	-0.304183747	4.39E-30	-0.087890952	0.001279366	-0.072343584	0.00806801	-0.292016638	9.41E-28	-0.144303248	1.13E-07	0.129563912	1.95E-06	0.112745259	3.53E-05	0.135463214	6.45E-07	0.194769799	6.38E-13	0.278703794	2.49E-25	0.386625166	5.11E-49	0.048434605	0.076330959
SFTA1P	surfactant associated 1 (pseudogene)	207107	yellow	-0.273983976	1.68E-24	-0.194013389	7.86E-13	-0.097170446	0.000367851	0.232207835	7.29E-18	0.216236261	1.21E-15	-0.086506599	0.001526229	0.099420994	0.000267346	0.262362143	1.57E-22	0.312920551	7.93E-32	-0.11641771	1.94E-05	-0.065687662	0.016176145	0.118039427	1.48E-05	0.251137957	1.01E-20	0.139374494	3.02E-07	0.074261268	0.006535547	0.212805281	3.46E-15	-0.06600936	0.015661043	-0.014243342	0.602414292	0.315508209	2.35E-32
HBB	hemoglobin, beta	3043	yellow	-0.095886266	0.00044002	-0.402834469	1.93E-53	-0.097603996	0.000346095	-0.076829661	0.004893491	0.536251529	1.24E-100	0.334713042	1.95E-36	0.471873483	3.03E-75	0.567883354	2.92E-115	0.131371254	1.40E-06	0.1118965	4.04E-05	0.113350745	3.20E-05	0.279619281	1.72E-25	0.089220765	0.001077414	0.069600548	0.010818367	-0.026440357	0.333473145	0.024702602	0.366229992	-0.075381795	0.005766345	-0.057736369	0.034576065	-0.002089389	0.939090602
IL18	interleukin 18 (interferon-gamma-inducing factor)	3606	yellow	-0.271077526	5.33E-24	-0.314383755	4.00E-32	-0.098363748	0.000310843	-0.018113251	0.507657609	0.4579757	1.92E-70	0.130616946	1.61E-06	0.297814527	7.53E-29	0.288513223	4.21E-27	0.237951078	1.05E-18	-0.082270649	0.002579128	-0.040227523	0.141077431	0.347701943	2.28E-39	0.243032259	1.82E-19	0.196456504	4.00E-13	0.047394566	0.082868152	0.120800265	9.24E-06	-0.064190756	0.018773491	0.016289484	0.55132483	0.232098711	7.56E-18
CAP1	CAP, adenylate cyclase-associated protein 1 (yeast)	10487	yellow	-0.437047757	1.29E-63	-0.421060649	1.03E-58	-0.100246586	0.000237417	0.425592978	4.46E-60	0.370644043	6.79E-45	0.043632045	0.110385051	0.213464497	2.83E-15	0.383635081	3.15E-48	0.022772925	0.404869548	-0.196565715	3.88E-13	-0.148238515	4.99E-08	0.302869884	7.94E-30	0.133436971	9.49E-07	0.181771415	2.03E-11	0.126976525	3.12E-06	0.114064501	2.85E-05	-0.103910928	0.000138667	-0.11709346	1.73E-05	-0.105572623	0.00010803
HLA-DPB1	major histocompatibility complex, class II, DP beta 1	3115	yellow	0.053699812	0.04937727	-0.31922144	4.03E-33	-0.100540121	0.000227554	-0.330502047	1.62E-35	0.494255778	1.84E-83	0.348720752	1.32E-39	0.387981456	2.23E-49	0.398246195	3.66E-52	0.224586854	8.79E-17	0.411242577	7.83E-56	0.376142621	2.75E-46	0.42366722	1.70E-59	0.01424921	0.602264795	0.107641036	7.88E-05	-0.083982625	0.002092099	-0.096798442	0.00038753	-0.185809058	7.12E-12	-0.073638544	0.00700178	0.180899315	2.54E-11
PPP1R1C	protein phosphatase 1, regulatory (inhibitor) subunit 1C	151242	yellow	-0.22461582	8.71E-17	-0.334494156	2.17E-36	-0.103989347	0.000137054	-0.057315007	0.03591925	0.322231065	9.46E-34	0.166676416	8.32E-10	0.188868072	3.17E-12	0.28945569	2.82E-27	0.087205265	0.00139663	0.066107058	0.01550749	0.101080412	0.000210398	0.236699114	1.61E-18	0.076784782	0.004918644	0.051361925	0.060156993	-0.010588492	0.69856998	0.017547853	0.520998615	-0.121165225	8.68E-06	-0.031095678	0.255328703	0.13392796	8.65E-07
FYB	FYN binding protein	2533	yellow	-0.317746917	8.14E-33	-0.445468963	2.64E-66	-0.104010483	0.000136622	-0.04968115	0.069055851	0.593688854	1.99E-128	0.160982194	3.10E-09	0.354610981	5.51E-41	0.364711056	2.02E-43	0.139593865	2.89E-07	-0.156872071	7.79E-09	-0.03259705	0.233084356	0.396885782	8.67E-52	0.286916155	8.27E-27	0.153506248	1.63E-08	0.199997173	1.48E-13	0.252958665	5.23E-21	0.100016078	0.000245441	0.133316609	9.71E-07	0.022217232	0.416432779
SH3RF3	SH3 domain containing ring finger 3	344558	yellow	-0.03933167	0.150153731	0.393887498	5.73E-51	-0.105671922	0.000106418	0.315526865	2.33E-32	-0.328050345	5.48E-35	-0.420975416	1.09E-58	-0.292747535	6.87E-28	-0.111069369	4.61E-05	0.083709755	0.002163604	-0.152996448	1.82E-08	-0.356623957	1.83E-41	-0.060533106	0.026702481	0.282320653	5.64E-26	0.296262771	1.49E-28	-0.048566313	0.075533925	0.107896738	7.57E-05	-0.113406497	3.17E-05	-0.005376856	0.844106924	0.256472151	1.43E-21
RSRC1	arginine/serine-rich coiled-coil 1	51319	yellow	0.114397084	2.70E-05	-0.13523364	6.74E-07	-0.106328825	9.63E-05	-0.314892506	3.15E-32	0.372147023	2.84E-45	0.223152422	1.39E-16	0.310111006	2.93E-31	0.200143761	1.42E-13	0.01635313	0.549770424	0.112202854	3.85E-05	0.113041113	3.36E-05	0.475377298	1.72E-76	0.064621944	0.017990334	0.208100514	1.41E-14	-0.020276638	0.45831131	-0.019878258	0.467191359	-0.065875086	0.015874263	0.0476246	0.081384539	-0.013169505	0.630051729
MFHAS1	malignant fibrous histiocytoma amplified sequence 1	9258	yellow	0.1951203	5.79E-13	0.333248489	4.08E-36	-0.106995287	8.70E-05	-0.027104413	0.321470467	-0.318901382	4.70E-33	-0.275706014	8.41E-25	-0.209792142	8.56E-15	-0.12845873	2.39E-06	0.082420794	0.002532599	0.135147411	6.86E-07	-0.04356822	0.110907525	-0.021425822	0.43323267	0.09139346	0.000809752	0.163334248	1.81E-09	-0.025973059	0.342090377	0.0418955	0.125308163	-0.084153132	0.002048524	0.05977057	0.028678603	0.244624654	1.04E-19
LOC100288165	similar to hCG2040565	100288165	yellow	-0.356944095	1.54E-41	-0.625068832	3.88E-146	-0.10800605	7.45E-05	-0.212901364	3.36E-15	0.498986172	2.80E-85	0.585141147	6.19E-124	0.451077882	3.86E-68	0.339205179	1.95E-37	0.070904019	0.00942175	0.214369932	2.15E-15	0.153551089	1.61E-08	0.289260458	3.06E-27	-0.02332468	0.393580171	-0.109029742	6.35E-05	0.040919469	0.134360047	0.055008451	0.044084637	0.243631689	1.47E-19	0.347481073	2.56E-39	-0.006589945	0.809548064
TMPPE	transmembrane protein with metallophosphoesterase domain	643853	yellow	0.378626199	6.33E-47	0.357273224	1.28E-41	-0.108790296	6.59E-05	-0.142678315	1.56E-07	-0.360437985	2.22E-42	-0.134511936	7.74E-07	-0.088042983	0.001254627	-0.071304904	0.009025778	-0.0010834	0.96839454	0.148671469	4.56E-08	-0.127074656	3.07E-06	-0.0704115	0.009929374	-0.006845141	0.802322567	0.182577694	1.65E-11	-0.112029425	3.96E-05	0.03581375	0.190129761	-0.065818557	0.015964788	0.083778774	0.002145309	0.138915417	3.31E-07
MTHFR	methylenetetrahydrofolate reductase (NAD(P)H)	4524	yellow	0.150383235	3.18E-08	0.287284474	7.08E-27	-0.109003248	6.38E-05	0.101732818	0.000191298	-0.439019944	3.07E-64	-0.15579695	9.88E-09	-0.217202897	9.01E-16	-0.109629185	5.78E-05	-0.029338737	0.283180117	0.253756353	3.90E-21	-0.14291652	1.49E-07	-0.304595461	3.65E-30	0.172287381	2.18E-10	0.117179165	1.71E-05	-0.015032058	0.58246945	0.055566006	0.041979545	0.111460263	4.33E-05	0.293880932	4.20E-28	0.020158749	0.460929216
LOC401533	hypothetical gene supported by BC049217	401533	yellow	0.003165198	0.907844784	0.344848687	1.03E-38	-0.109174615	6.21E-05	0.262763701	1.34E-22	-0.351218098	3.47E-40	-0.277140759	4.71E-25	-0.274823847	1.20E-24	-0.210331807	7.29E-15	-0.075908537	0.005433758	-0.015560465	0.569281879	-0.253296915	4.62E-21	0.114900232	2.49E-05	0.037353518	0.171761979	0.329177645	3.13E-35	-0.180196459	3.04E-11	-0.104388124	0.000129121	-0.191500045	1.56E-12	0.012694348	0.642451115	0.100845509	0.000217702
C19orf66	chromosome 19 open reading frame 66	55337	yellow	0.193655733	8.67E-13	0.367230094	4.82E-44	-0.109302109	6.09E-05	0.297603683	8.27E-29	-0.314346912	4.07E-32	-0.34432054	1.36E-38	-0.224749365	8.34E-17	0.033294853	0.223227015	0.008454478	0.757168307	0.165404053	1.12E-09	-0.154726468	1.25E-08	-0.154245658	1.39E-08	0.189286037	2.83E-12	0.237192797	1.36E-18	-0.012397245	0.650255271	0.050831442	0.062856898	-0.257973297	8.19E-22	-0.145390649	9.01E-08	0.10271569	0.000165573
IFI30	interferon, gamma-inducible protein 30	10437	yellow	-0.132533589	1.12E-06	-0.41493411	6.63E-57	-0.109469916	5.93E-05	-0.150132975	3.35E-08	0.604171071	4.00E-134	0.289107926	3.27E-27	0.490591742	4.48E-82	0.511238674	4.06E-90	0.223081109	1.42E-16	0.120017745	1.06E-05	0.182703353	1.60E-11	0.361339785	1.34E-42	0.17227241	2.18E-10	0.146161349	7.69E-08	0.015648379	0.567101692	0.048554046	0.075607875	-0.16136548	2.84E-09	-0.109731359	5.69E-05	0.157070217	7.46E-09
MNDA	myeloid cell nuclear differentiation antigen	4332	yellow	-0.211279369	5.48E-15	-0.322774998	7.27E-34	-0.110100687	5.37E-05	-0.005785254	0.832435335	0.517983677	7.23E-93	0.154037932	1.45E-08	0.35418172	6.96E-41	0.395881239	1.64E-51	0.183799227	1.20E-11	-0.064878738	0.017537633	-0.021917658	0.422746432	0.383969693	2.57E-48	0.281605485	7.58E-26	0.224960816	7.80E-17	0.05367191	0.049495674	0.128211865	2.50E-06	-0.053243465	0.05134391	0.006194072	0.820788574	0.129832499	1.86E-06
GRID2	glutamate receptor, ionotropic, delta 2	2895	yellow	-0.429584731	2.70E-61	-0.477475358	3.03E-77	-0.110115775	5.36E-05	0.125972597	3.74E-06	0.459093433	8.05E-71	0.167747172	6.47E-10	0.23015908	1.44E-17	0.385207153	1.21E-48	0.13394759	8.61E-07	0.1674822	6.88E-10	0.175711311	9.39E-11	0.429726431	2.44E-61	0.064109725	0.018923944	0.120362741	9.96E-06	-0.063917774	0.019284559	-0.055878263	0.040838163	-0.28234247	5.59E-26	-0.092086093	0.00073834	0.121279975	8.51E-06
S100A10	S100 calcium binding protein A10	6281	yellow	-0.430659796	1.26E-61	-0.522742032	7.63E-95	-0.111786478	4.11E-05	0.21275318	3.52E-15	0.465501629	5.13E-73	0.139969744	2.69E-07	0.262713108	1.37E-22	0.490648409	4.26E-82	0.075780339	0.00551307	-0.137785571	4.12E-07	-0.103420912	0.000149158	0.296294884	1.47E-28	0.141819438	1.86E-07	0.11955971	1.14E-05	0.112591652	3.61E-05	0.14033453	2.50E-07	-0.016015089	0.558050934	-0.014272087	0.601682034	-0.014383674	0.598843223
IL1B	interleukin 1, beta	3553	yellow	-0.356949167	1.53E-41	-0.27136014	4.76E-24	-0.115394705	2.29E-05	0.05324936	0.051318094	0.385756773	8.69E-49	0.01718047	0.529762955	0.164501003	1.38E-09	0.186702586	5.63E-12	0.148505525	4.72E-08	-0.163665919	1.68E-09	-0.107979172	7.48E-05	0.375572225	3.85E-46	0.246952095	4.56E-20	0.194235909	7.39E-13	0.135159574	6.84E-07	0.227179061	3.81E-17	0.03702159	0.175604883	0.12030923	1.01E-05	0.16556899	1.08E-09
HMGN2	high-mobility group nucleosomal binding domain 2	3151	yellow	-0.390615481	4.40E-50	-0.567065629	7.31E-115	-0.11584692	2.13E-05	-0.091373819	0.000811868	0.675716228	2.03E-179	0.563762499	2.90E-113	0.540025976	2.69E-102	0.52805227	4.35E-97	0.123396448	5.89E-06	0.335761571	1.14E-36	0.226313848	5.04E-17	0.509765884	1.59E-89	0.059897008	0.028342488	0.161616649	2.69E-09	-0.254124713	3.41E-21	-0.211788326	4.71E-15	-0.314632901	3.55E-32	-0.10410938	0.000134619	0.112376866	3.74E-05
LOC728056	IQ motif and Sec7 domain 3 pseudogene	728056	yellow	0.153131358	1.77E-08	0.349560498	8.45E-40	-0.116480349	1.92E-05	0.014791823	0.588511777	-0.386477043	5.60E-49	-0.25920673	5.16E-22	-0.231712821	8.60E-18	-0.239803532	5.57E-19	0.18687353	5.38E-12	0.191023137	1.78E-12	-0.05598659	0.040448386	-0.074282928	0.006519844	0.112437722	3.71E-05	0.144300058	1.13E-07	-0.141194564	2.11E-07	0.032325255	0.237006044	-0.164718674	1.32E-09	0.050179047	0.066313694	0.417764724	9.78E-58
C19orf53	chromosome 19 open reading frame 53	28974	yellow	-0.088138156	0.001239365	0.023624261	0.38753104	-0.116935542	1.78E-05	0.14633949	7.41E-08	0.261439727	2.22E-22	-0.239955534	5.29E-19	0.108361938	7.05E-05	0.254059218	3.49E-21	0.103940095	0.000138065	-0.186253908	6.34E-12	-0.159258704	4.58E-09	0.37778888	1.04E-46	0.339009768	2.16E-37	0.434297932	9.38E-63	0.048057615	0.078650243	0.164414861	1.41E-09	-0.314817278	3.26E-32	-0.244410031	1.12E-19	0.050081027	0.066846333
DPY19L2	dpy-19-like 2 (C. elegans)	283417	yellow	0.287370728	6.83E-27	0.342621381	3.32E-38	-0.118081461	1.47E-05	0.223890174	1.10E-16	-0.37592264	3.13E-46	-0.210563664	6.80E-15	-0.210963699	6.03E-15	-0.032581204	0.233311727	-0.023318594	0.393703643	0.21403711	2.38E-15	-0.112885532	3.45E-05	-0.125879084	3.80E-06	-0.014550642	0.594606854	0.148659525	4.57E-08	-0.044350027	0.104640517	-0.038299152	0.161158799	-0.074328374	0.006487007	0.033913026	0.21474657	0.084005998	0.002086076
SH3GLB1	SH3-domain GRB2-like endophilin B1	51100	yellow	-0.452196372	1.65E-68	-0.500957157	4.81E-86	-0.118214712	1.43E-05	-0.030415671	0.265873939	0.598476011	5.29E-131	0.293335609	5.33E-28	0.524047416	2.16E-95	0.449742532	1.06E-67	0.039793934	0.145416285	-0.168976257	4.83E-10	-0.037032077	0.175482498	0.508141645	7.09E-89	0.13594966	5.88E-07	0.238653185	8.27E-19	0.00437242	0.872953342	-0.0029609	0.913768971	-0.18557681	7.57E-12	-0.097858166	0.000333906	-0.027798581	0.309228595
COL8A2	collagen, type VIII, alpha 2	1296	yellow	-0.224207385	9.93E-17	-0.290452894	1.84E-27	-0.119686631	1.12E-05	-0.128219045	2.49E-06	0.323399548	5.37E-34	0.183332023	1.36E-11	0.203591573	5.29E-14	0.187308357	4.80E-12	0.328981264	3.45E-35	0.159348691	4.49E-09	0.068875086	0.011672808	0.379316085	4.20E-47	0.176569595	7.58E-11	0.152493214	2.03E-08	-0.020779726	0.44723364	0.112462568	3.69E-05	-0.09095121	0.000858643	0.103128003	0.000155781	0.387495185	3.00E-49
TFEC	transcription factor EC	22797	yellow	-0.330330959	1.76E-35	-0.341047626	7.53E-38	-0.121609143	8.04E-06	0.009207183	0.736319824	0.550415928	5.46E-107	0.106197549	9.83E-05	0.33171604	8.82E-36	0.324289725	3.48E-34	0.12476875	4.63E-06	-0.199158051	1.88E-13	-0.132183374	1.20E-06	0.479547956	5.39E-78	0.304882313	3.20E-30	0.276311287	6.58E-25	0.097851329	0.000334228	0.176153655	8.41E-11	-0.044716477	0.101801362	0.044342988	0.104695668	0.09069202	0.000888553
C5AR1	complement component 5a receptor 1	728	yellow	-0.230885683	1.13E-17	-0.150071472	3.40E-08	-0.124748992	4.65E-06	0.036420232	0.182729694	0.190341734	2.13E-12	-0.053408731	0.050624257	0.077033333	0.004780789	0.13833989	3.70E-07	0.246779914	4.85E-20	-0.04187163	0.125523723	-0.077997528	0.004278453	0.238813633	7.83E-19	0.251783054	8.02E-21	0.190115213	2.27E-12	0.091517325	0.000796529	0.178509695	4.66E-11	-0.052788779	0.053368107	0.073654653	0.006989353	0.306950314	1.25E-30
MGA	MAX gene associated	23269	yellow	-0.274854861	1.18E-24	-0.482966108	3.05E-79	-0.124964792	4.47E-06	-0.224054613	1.04E-16	0.568136482	2.20E-115	0.537119557	5.17E-101	0.558678075	7.70E-111	0.468583401	4.34E-74	0.116665222	1.86E-05	0.309083804	4.70E-31	0.244604024	1.05E-19	0.380819645	1.71E-47	0.094501806	0.000532483	0.104020288	0.000136422	-0.077913811	0.004320093	-0.075617011	0.005615626	-0.062710144	0.021693866	0.082575015	0.002485605	0.040907021	0.134478671
MESDC2	mesoderm development candidate 2	23184	yellow	-0.348313763	1.65E-39	-0.491583658	1.89E-82	-0.127408974	2.89E-06	-0.058748385	0.031524025	0.554165278	1.01E-108	0.366905357	5.80E-44	0.517932987	7.59E-93	0.46857225	4.38E-74	-0.036678477	0.179644242	0.108067407	7.38E-05	0.177602174	5.86E-11	0.471777642	3.27E-75	0.076114061	0.005308753	0.195381906	5.39E-13	-0.058015834	0.033709044	-0.173485071	1.62E-10	-0.243586247	1.50E-19	-0.103338208	0.000151001	-0.098960884	0.000285524
TRIM44	tripartite motif-containing 44	54765	yellow	0.459329607	6.70E-71	0.507938496	8.54E-89	-0.128033147	2.58E-06	-0.162589888	2.15E-09	-0.444830694	4.24E-66	-0.253184583	4.81E-21	-0.066725678	0.014565562	-0.106102527	9.97E-05	0.013772794	0.614457842	0.194123559	7.62E-13	-0.091168167	0.000834326	-0.167470733	6.90E-10	0.099032688	0.000282613	0.268422544	1.51E-23	-0.247345196	3.96E-20	-0.116916973	1.78E-05	-0.273265194	2.24E-24	-0.05501887	0.044044496	0.108040598	7.41E-05
RPL4	ribosomal protein L4	6124	yellow	-0.286599177	9.45E-27	-0.400046015	1.16E-52	-0.129647274	1.92E-06	0.07645868	0.005104958	0.507219708	1.65E-88	0.183621848	1.26E-11	0.275038148	1.10E-24	0.298142745	6.52E-29	0.229017703	2.09E-17	0.187614682	4.42E-12	0.191892699	1.40E-12	0.382926777	4.83E-48	0.217038264	9.48E-16	0.197261564	3.19E-13	-0.143157452	1.42E-07	-0.060517312	0.026742187	-0.242252079	2.39E-19	-0.043492228	0.111532142	0.163012281	1.95E-09
RPL27A	ribosomal protein L27a	6157	yellow	-0.330361713	1.74E-35	-0.523849519	2.62E-95	-0.129790328	1.87E-06	-0.042659034	0.118563814	0.757805353	2.24E-250	0.391951264	1.92E-50	0.482889844	3.26E-79	0.527145152	1.06E-96	0.09892379	0.000287039	0.153663365	1.57E-08	0.117931969	1.50E-05	0.555641836	2.06E-109	0.235510012	2.41E-18	0.230501998	1.28E-17	-0.061506322	0.024351877	-0.013722972	0.615739202	-0.174940928	1.14E-10	-0.014643943	0.592245544	0.032970738	0.22776785
CD86	CD86 molecule	942	yellow	-0.195138866	5.76E-13	-0.285946303	1.24E-26	-0.13082722	1.55E-06	0.004684524	0.863970071	0.382165835	7.63E-48	0.103222439	0.000153616	0.289722696	2.51E-27	0.280433876	1.23E-25	0.262626994	1.42E-22	-0.100505587	0.000228694	-0.106417837	9.50E-05	0.308207547	7.03E-31	0.298005187	6.93E-29	0.183115135	1.44E-11	0.168484292	5.43E-10	0.230162825	1.43E-17	0.070421869	0.009918441	0.154357457	1.35E-08	0.223276371	1.34E-16
ARHGAP39	Rho GTPase activating protein 39	80728	yellow	0.290776363	1.60E-27	0.555180424	3.39E-109	-0.131533069	1.36E-06	-0.063076135	0.020937454	-0.52000702	1.05E-93	-0.436748946	1.60E-63	-0.273688517	1.89E-24	-0.254150345	3.38E-21	0.026321808	0.335645904	0.084272068	0.002018623	-0.162680146	2.11E-09	-0.235156609	2.72E-18	0.239980991	5.24E-19	0.254442026	3.03E-21	0.003842164	0.888252662	0.103636126	0.000144462	-0.087308816	0.001378308	0.071090747	0.009235424	0.199238649	1.83E-13
MED12L	mediator complex subunit 12-like	116931	yellow	0.149231046	4.06E-08	0.30170581	1.34E-29	-0.131866652	1.27E-06	0.090534967	0.000907143	-0.496377862	2.84E-84	-0.290882187	1.53E-27	-0.242108645	2.51E-19	-0.078068772	0.004243305	-0.065809372	0.01597954	-0.032182321	0.239086997	-0.266887068	2.75E-23	-0.266080127	3.76E-23	0.075768893	0.005520202	0.066309506	0.015193506	0.149199593	4.08E-08	0.190251112	2.19E-12	0.262912179	1.27E-22	0.340115713	1.22E-37	-0.007551073	0.782424679
RPL14	ribosomal protein L14	9045	yellow	-0.036347431	0.183606546	-0.089538051	0.001033795	-0.132030431	1.24E-06	0.078162887	0.004197273	0.374263626	8.28E-46	0.063974744	0.019176911	0.118355771	1.40E-05	0.266987312	2.64E-23	0.058600869	0.031954002	0.124548452	4.81E-06	-0.055806307	0.041098824	0.483645965	1.72E-79	0.210366438	7.21E-15	0.355795886	2.88E-41	-0.124336097	5.00E-06	-0.040824446	0.135267614	-0.342121496	4.31E-38	-0.162706444	2.09E-09	0.109448602	5.95E-05
CD74	CD74 molecule, major histocompatibility complex, class II invariant chain	972	yellow	-0.177700723	5.71E-11	-0.43613462	2.50E-63	-0.133020561	1.03E-06	-0.161244725	2.92E-09	0.66361071	7.20E-171	0.299569526	3.47E-29	0.485542354	3.43E-80	0.500280363	8.83E-86	0.162290159	2.30E-09	0.115652834	2.20E-05	0.108594171	6.80E-05	0.451653175	2.49E-68	0.223597344	1.21E-16	0.189706142	2.53E-12	0.057695646	0.034703979	0.095757352	0.000447952	-0.073187877	0.007357579	0.013190106	0.629516463	0.06667622	0.01463897
AOAH	acyloxyacyl hydrolase (neutrophil)	313	yellow	-0.194169543	7.53E-13	-0.284782859	2.03E-26	-0.133090177	1.01E-06	0.021521946	0.431171519	0.38095427	1.58E-47	0.062677081	0.021763354	0.269632082	9.41E-24	0.288605324	4.05E-27	0.267029678	2.60E-23	-0.056779973	0.037688616	-0.019620866	0.47297904	0.320018069	2.75E-33	0.248286391	2.83E-20	0.176377806	7.95E-11	0.115571571	2.23E-05	0.218186251	6.64E-16	-0.029272093	0.284275565	0.053245683	0.051334197	0.250216384	1.42E-20
ADAM28	ADAM metallopeptidase domain 28	10863	yellow	-0.224362806	9.45E-17	-0.253714579	3.96E-21	-0.133960639	8.59E-07	-0.055907638	0.040732156	0.358675498	5.91E-42	0.054968114	0.044240325	0.295308146	2.26E-28	0.22017177	3.57E-16	0.283443836	3.54E-26	-0.115926276	2.10E-05	-0.077193297	0.004693925	0.323690664	4.66E-34	0.302703995	8.56E-30	0.192324158	1.25E-12	0.149253584	4.04E-08	0.250143592	1.45E-20	0.004768055	0.861568723	0.090108632	0.000959438	0.285257524	1.66E-26
C3orf51	chromosome 3 open reading frame 51	711	yellow	0.178087337	5.18E-11	0.516295622	3.58E-92	-0.133998062	8.53E-07	-0.03775863	0.167157389	-0.506301551	3.82E-88	-0.423179068	2.39E-59	-0.30034749	2.45E-29	-0.309564897	3.77E-31	-0.004525159	0.868554941	0.101496395	0.000198024	-0.178596215	4.56E-11	-0.192958026	1.05E-12	0.257181055	1.10E-21	0.213709106	2.63E-15	0.080803426	0.003076673	0.24353118	1.53E-19	0.108588522	6.80E-05	0.313674751	5.57E-32	0.098148314	0.000320482
BCAS4	breast carcinoma amplified sequence 4	55653	yellow	0.113439152	3.15E-05	0.357595794	1.07E-41	-0.134065054	8.42E-07	0.322579627	7.99E-34	-0.375375551	4.32E-46	-0.398302823	3.53E-52	-0.300039479	2.81E-29	-0.06802671	0.012747443	0.078173721	0.004192003	0.069769007	0.010628087	-0.161775638	2.59E-09	-0.041296395	0.130806274	0.128230617	2.49E-06	0.262239967	1.64E-22	-0.090323502	0.000932743	-0.050941002	0.062291235	-0.201488092	9.67E-14	-0.065051124	0.017239361	0.200843835	1.16E-13
BCL9	B-cell CLL/lymphoma 9	607	yellow	0.267041954	2.59E-23	0.601886586	7.27E-133	-0.136793391	5.00E-07	-0.125697108	3.93E-06	-0.527577072	6.93E-97	-0.313244464	6.82E-32	-0.296941685	1.11E-28	-0.263340256	1.08E-22	-0.07875216	0.003919201	0.244142974	1.23E-19	-0.163183397	1.88E-09	-0.043299218	0.113131053	0.142836951	1.51E-07	0.323111958	6.17E-34	-0.095485583	0.000465111	-0.06062554	0.026471113	-0.194773439	6.38E-13	0.119071047	1.24E-05	0.176197009	8.32E-11
C5orf22	chromosome 5 open reading frame 22	55322	yellow	0.242809388	1.96E-19	0.395309166	2.35E-51	-0.137691117	4.20E-07	0.177749316	5.64E-11	-0.45457357	2.67E-69	-0.230887556	1.13E-17	-0.150358709	3.20E-08	0.008265087	0.762442695	-0.248705807	2.44E-20	-0.008836406	0.746566501	-0.32843943	4.52E-35	-0.093339606	0.000623746	-0.013699885	0.616333391	0.283449813	3.53E-26	-0.134945375	7.13E-07	-0.065466686	0.016538533	-0.072957685	0.007545493	0.045943075	0.092741378	-0.19056023	2.01E-12
ARHGAP15	Rho GTPase activating protein 15	55843	yellow	-0.251826571	7.90E-21	-0.219386209	4.57E-16	-0.138005561	3.95E-07	-0.048624136	0.075186162	0.300057544	2.79E-29	0.028147759	0.303188624	0.238229981	9.56E-19	0.182069028	1.88E-11	0.311828126	1.32E-31	-0.123994022	5.31E-06	-0.111422184	4.36E-05	0.305705079	2.21E-30	0.288040122	5.14E-27	0.201738692	9.01E-14	0.087248537	0.001388947	0.255779245	1.85E-21	-0.055462227	0.042364804	0.047154817	0.08443764	0.382692682	5.56E-48
SLC16A8	solute carrier family 16, member 8 (monocarboxylic acid transporter 3)	23539	yellow	-0.535068725	4.09E-100	-0.52749658	7.50E-97	-0.138134976	3.85E-07	0.178973621	4.15E-11	0.474624371	3.19E-76	0.082238516	0.002589187	0.284935279	1.90E-26	0.246130398	6.11E-20	0.186741337	5.57E-12	-0.100453374	0.000230428	0.017727943	0.516729761	0.378382062	7.32E-47	0.225603778	6.34E-17	0.139700587	2.83E-07	0.26002448	3.79E-22	0.309512245	3.86E-31	0.092873273	0.000664295	0.180364024	2.91E-11	0.083920226	0.002108257
CUL5	cullin 5	8065	yellow	0.304786377	3.35E-30	0.270229882	7.44E-24	-0.138528143	3.57E-07	-0.078492039	0.004039821	-0.365687387	1.16E-43	0.137063173	4.74E-07	0.041533346	0.128609796	-0.031107076	0.255154461	-0.161824183	2.56E-09	0.226376266	4.94E-17	-0.205231321	3.28E-14	-0.057250094	0.036130075	-0.073060861	0.007460742	0.214356394	2.16E-15	-0.261430027	2.23E-22	-0.126444163	3.43E-06	-0.035568939	0.193178508	0.159334624	4.50E-09	-0.06900111	0.011520218
ITGA11	integrin, alpha 11	22801	yellow	0.250557176	1.25E-20	0.309487318	3.90E-31	-0.139031285	3.23E-07	-0.139785864	2.78E-07	-0.345297911	8.14E-39	-0.222152816	1.91E-16	-0.055804459	0.041105537	-0.138118892	3.86E-07	0.090723349	0.000884887	0.094444156	0.0005367	-0.060708109	0.0262659	-0.118993777	1.26E-05	0.13240015	1.15E-06	0.113986646	2.89E-05	0.141252219	2.08E-07	0.281855596	6.84E-26	0.060970335	0.025623265	0.140705303	2.32E-07	0.164874712	1.27E-09
PTPRC	protein tyrosine phosphatase, receptor type, C	5788	yellow	-0.332141463	7.13E-36	-0.441268678	5.91E-65	-0.141176118	2.11E-07	-0.06457884	0.018067315	0.622792561	8.75E-145	0.211392996	5.30E-15	0.431340942	7.77E-62	0.448254562	3.27E-67	0.130019863	1.79E-06	-0.100615487	0.000225085	-0.030173458	0.269701403	0.495932805	4.20E-84	0.265437053	4.82E-23	0.253498611	4.29E-21	0.092526723	0.000696	0.134337586	8.00E-07	-0.02004567	0.463448118	0.077127325	0.004729575	0.052529147	0.054553522
RPL13AP3	ribosomal protein L13a pseudogene 3	645683	yellow	-0.221907763	2.06E-16	-0.392949155	1.03E-50	-0.141521795	1.97E-07	-0.193793069	8.35E-13	0.506729777	2.58E-88	0.328051728	5.48E-35	0.345120187	8.94E-39	0.19801029	2.59E-13	0.117303459	1.67E-05	0.094222123	0.000553234	0.002770175	0.919303878	0.409698494	2.18E-55	0.249942788	1.56E-20	0.130943106	1.51E-06	0.066528801	0.014859714	0.178442669	4.74E-11	0.144395005	1.10E-07	0.340235458	1.15E-37	0.090370281	0.000927023
UNC13C	unc-13 homolog C (C. elegans)	440279	yellow	0.419985406	2.15E-58	0.502945589	8.04E-87	-0.141709365	1.90E-07	-0.157962543	6.12E-09	-0.438663045	3.98E-64	-0.295014092	2.57E-28	-0.191629182	1.51E-12	-0.203065631	6.15E-14	0.035437486	0.194830286	0.156900058	7.74E-09	-0.147351396	6.01E-08	-0.093968232	0.00057272	0.123738506	5.55E-06	0.183531756	1.29E-11	-0.033163864	0.225054315	0.119511065	1.15E-05	0.030138693	0.270253846	0.209445695	9.49E-15	0.195562308	5.13E-13
HAVCR2	hepatitis A virus cellular receptor 2	84868	yellow	-0.260889919	2.74E-22	-0.311077515	1.87E-31	-0.141728484	1.89E-07	-0.056379354	0.039061482	0.522075699	1.45E-94	0.153107466	1.77E-08	0.411485731	6.66E-56	0.305325911	2.62E-30	0.202728578	6.78E-14	-0.056035562	0.040273217	-0.014259749	0.601996304	0.483680236	1.67E-79	0.279348957	1.92E-25	0.288327109	4.55E-27	0.071672003	0.008676269	0.145148546	9.47E-08	-0.102873708	0.000161754	0.011045684	0.686232287	0.183032941	1.47E-11
CSF2RA	colony stimulating factor 2 receptor, alpha, low-affinity (granulocyte-macrophage)	1438	yellow	-0.302413887	9.75E-30	-0.280254094	1.32E-25	-0.143124359	1.43E-07	0.008120489	0.766477046	0.447234025	7.04E-67	0.031299174	0.252230224	0.304521355	3.77E-30	0.29806529	6.74E-29	0.233401877	4.90E-18	-0.172267901	2.19E-10	-0.076101209	0.005316493	0.417391876	1.26E-57	0.307106305	1.16E-30	0.258706823	6.23E-22	0.06661191	0.014734909	0.188987525	3.07E-12	-0.111981791	3.99E-05	-0.037785694	0.166853114	0.23725633	1.33E-18
DSCAM	Down syndrome cell adhesion molecule	1826	yellow	0.357160155	1.36E-41	0.580466422	1.56E-121	-0.143918936	1.22E-07	0.044963873	0.099919491	-0.425465618	4.87E-60	-0.396069826	1.45E-51	-0.10486861	0.000120137	0.011576358	0.672015848	-0.049821642	0.068272831	0.069228905	0.011248886	-0.241992692	2.61E-19	-0.229573268	1.74E-17	0.299588677	3.44E-29	0.347366094	2.73E-39	-0.014852985	0.58697071	0.08914205	0.001088495	-0.18430938	1.05E-11	-0.079498835	0.003590891	0.041012308	0.133477888
AVL9	AVL9 homolog (S. cerevisiase)	23080	yellow	0.123091204	6.22E-06	0.467523062	1.02E-73	-0.144956498	9.85E-08	0.267860149	1.88E-23	-0.521420138	2.72E-94	-0.36373523	3.50E-43	-0.30910886	4.65E-31	-0.080806459	0.00307556	-0.197774511	2.77E-13	-0.124929733	4.50E-06	-0.469108037	2.85E-74	-0.084783423	0.001894567	0.09521203	0.000483001	0.308499828	6.15E-31	-0.084049761	0.002074841	-0.004902359	0.857710465	-0.093254176	0.000630998	0.023262395	0.394844954	-0.026955717	0.32413334
RPS27	ribosomal protein S27	6232	yellow	-0.307555045	9.49E-31	-0.567978483	2.63E-115	-0.145150874	9.46E-08	0.027468392	0.315012702	0.780653832	1.99E-275	0.382439955	6.47E-48	0.513646987	4.31E-91	0.619255398	1.05E-142	0.100291052	0.000235897	0.086715137	0.001486433	0.079114225	0.003756745	0.536049775	1.52E-100	0.20917715	1.03E-14	0.216611897	1.08E-15	-0.016812733	0.538610087	0.014115432	0.605677604	-0.154906592	1.20E-08	-0.020955798	0.443392863	-0.015763606	0.564250227
RPLP1	ribosomal protein, large, P1	6176	yellow	-0.279449696	1.84E-25	-0.46328363	2.99E-72	-0.145248806	9.28E-08	-0.02540428	0.352769151	0.644121919	6.45E-158	0.327145531	8.57E-35	0.441486179	5.04E-65	0.531278854	1.80E-98	0.036612884	0.180424241	0.071901563	0.008463897	0.006105408	0.823311264	0.40365239	1.14E-53	0.248738003	2.41E-20	0.217915556	7.22E-16	-0.06741216	0.01357962	0.004787367	0.861013741	-0.149330141	3.97E-08	-0.009668684	0.723631247	-0.029669986	0.277777667
KBTBD8	kelch repeat and BTB (POZ) domain containing 8	84541	yellow	0.095535565	0.00046191	0.230111045	1.46E-17	-0.145571845	8.68E-08	0.162054657	2.43E-09	-0.316721698	1.33E-32	-0.201236739	1.04E-13	-0.152105318	2.20E-08	-0.139114501	3.18E-07	-0.039511709	0.148294837	-0.007436697	0.785639316	-0.246891056	4.66E-20	0.031132456	0.25476676	0.056680065	0.03802709	0.207399325	1.74E-14	-0.000261377	0.992373095	0.064209442	0.018738944	0.033725424	0.217295312	0.187002653	5.20E-12	0.108309953	7.10E-05
SERF1B	small EDRK-rich factor 1B (centromeric)	728492	yellow	-0.155115975	1.15E-08	-0.029439932	0.281522203	-0.147580425	5.73E-08	0.206083833	2.56E-14	0.319205529	4.06E-33	-0.1744352	1.29E-10	0.123162353	6.14E-06	0.287247241	7.19E-27	0.012876437	0.63768743	-0.25923476	5.11E-22	-0.315866238	1.99E-32	0.465362855	5.74E-73	0.378844631	5.56E-47	0.511144982	4.43E-90	-0.022424201	0.412103471	0.11335825	3.19E-05	-0.232214804	7.27E-18	-0.111505292	4.30E-05	0.018817146	0.49130244
ADAP2	ArfGAP with dual PH domains 2	55803	yellow	-0.310757176	2.17E-31	-0.384691357	1.66E-48	-0.148921015	4.33E-08	0.016936961	0.535613091	0.629288598	1.12E-148	0.091437402	0.000805038	0.397424307	6.17E-52	0.568184686	2.08E-115	0.199235312	1.83E-13	-0.028777775	0.292490236	0.010939223	0.689097915	0.448296632	3.17E-67	0.370955411	5.67E-45	0.316064281	1.81E-32	0.041293079	0.130837218	0.133933218	8.64E-07	-0.240859729	3.87E-19	-0.130303667	1.70E-06	0.106928565	8.79E-05
GLTSCR2	glioma tumor suppressor candidate region gene 2	29997	yellow	0.090181687	0.000950283	-0.284621503	2.17E-26	-0.151712054	2.40E-08	-0.291486619	1.18E-27	0.563308279	4.79E-113	0.37869667	6.07E-47	0.492231843	1.08E-82	0.447257418	6.91E-67	0.162192542	2.35E-09	0.545340644	1.12E-104	0.375194027	4.80E-46	0.423171499	2.40E-59	0.170064273	3.72E-10	0.225435067	6.69E-17	-0.134032162	8.48E-07	-0.096901061	0.000382005	-0.306336709	1.65E-30	-0.076993323	0.004802742	0.120845141	9.17E-06
OR2AK2	olfactory receptor, family 2, subfamily AK, member 2	391191	yellow	0.32700431	9.19E-35	0.461275595	1.46E-71	-0.152055596	2.23E-08	-0.098375773	0.000310313	-0.435300486	4.56E-63	-0.214290118	2.20E-15	-0.125436821	4.11E-06	-0.201315942	1.02E-13	-0.016961629	0.535018985	0.204715383	3.82E-14	-0.129339687	2.03E-06	-0.046356871	0.089835063	0.077164236	0.004709598	0.242202284	2.43E-19	-0.17340113	1.66E-10	-0.040085678	0.142485767	-0.192693228	1.13E-12	0.021179761	0.43853474	0.217469881	8.29E-16
ATP8B2	ATPase, class I, type 8B, member 2	57198	yellow	0.385965817	7.65E-49	0.44824067	3.30E-67	-0.152523448	2.01E-08	0.033337087	0.222640122	-0.487031552	9.61E-81	-0.260261277	3.47E-22	-0.272511535	3.02E-24	-0.129865398	1.85E-06	0.009869466	0.71813428	0.50141246	3.20E-86	0.044358669	0.104572848	-0.150965867	2.81E-08	0.065326466	0.016772163	0.235287902	2.60E-18	-0.088481178	0.00118577	-0.069515965	0.010915043	-0.201416689	9.87E-14	0.06034628	0.027175449	0.13824792	3.77E-07
FAU	Finkel-Biskis-Reilly murine sarcoma virus (FBR-MuSV) ubiquitously expressed	2197	yellow	-0.331927725	7.93E-36	-0.412353559	3.74E-56	-0.153491098	1.63E-08	0.015019732	0.582778763	0.700899188	1.38E-198	0.183073876	1.45E-11	0.404122151	8.41E-54	0.452798481	1.04E-68	0.098783291	0.000292845	-0.000433879	0.9873399	0.019330624	0.479552357	0.586146812	1.86E-124	0.359479567	3.78E-42	0.325457323	1.97E-34	0.093013507	0.000651851	0.161914262	2.51E-09	-0.169764448	4.00E-10	-0.058670429	0.031750628	0.029625098	0.278505624
RPLP2	ribosomal protein, large, P2	6181	yellow	-0.271781949	4.03E-24	-0.407641482	8.45E-55	-0.154035013	1.45E-08	-0.006201629	0.820573652	0.691125432	6.50E-191	0.30116399	1.71E-29	0.500642243	6.38E-86	0.518542394	4.26E-93	0.100474509	0.000229725	0.044020935	0.107243427	-0.028163817	0.30291275	0.55017231	7.07E-107	0.317341174	9.88E-33	0.354860035	4.81E-41	-0.066634675	0.014700885	0.044282351	0.10517166	-0.226446732	4.83E-17	-0.056957266	0.037094271	0.041056489	0.133059649
SUPT3H	suppressor of Ty 3 homolog (S. cerevisiae)	8464	yellow	-0.071977882	0.008394328	0.167361498	7.08E-10	-0.154780897	1.23E-08	0.008473532	0.756638296	0.118304027	1.41E-05	-0.207716613	1.58E-14	-0.005395499	0.843573356	0.075462699	0.005714098	-0.141638481	1.93E-07	-0.239168854	6.93E-19	-0.345690892	6.62E-39	0.416536298	2.25E-57	0.340926233	8.02E-38	0.445431095	2.71E-66	0.040548979	0.137925351	0.110723986	4.87E-05	-0.153437944	1.65E-08	0.044503659	0.103442669	-0.02511161	0.358345217
RPS6	ribosomal protein S6	6194	yellow	-0.199267719	1.82E-13	-0.49969032	1.50E-85	-0.15550925	1.05E-08	-0.223787039	1.14E-16	0.738041102	7.39E-231	0.444536124	5.28E-66	0.618573926	2.63E-142	0.528880552	1.93E-97	0.125333367	4.19E-06	0.183603942	1.27E-11	0.161301252	2.89E-09	0.509286312	2.47E-89	0.233332866	5.01E-18	0.211255164	5.52E-15	-0.011214934	0.681685808	0.058448651	0.032402938	-0.135391526	6.54E-07	0.010567566	0.6991366	0.025764524	0.345981379
HIST2H2AA4	histone cluster 2, H2aa4	723790	yellow	-0.385965571	7.65E-49	-0.568740075	1.11E-115	-0.155567136	1.04E-08	-0.091675129	0.000779972	0.6364641	4.41E-153	0.355996288	2.58E-41	0.563291255	4.88E-113	0.347735708	2.24E-39	0.06486431	0.017562801	0.106371253	9.57E-05	0.157575594	6.67E-09	0.527726963	5.99E-97	0.100673349	0.000223206	0.136471088	5.32E-07	0.119326604	1.19E-05	0.03823048	0.161911777	-0.141107421	2.14E-07	-0.027222734	0.3193618	0.011897839	0.663459807
PLD4	phospholipase D family, member 4	122618	yellow	-0.079707491	0.003503723	-0.158836391	5.03E-09	-0.156348256	8.75E-09	-0.034049226	0.212909703	0.315495251	2.37E-32	0.012486499	0.647906705	0.261187965	2.44E-22	0.331153215	1.17E-35	0.240233954	4.80E-19	-0.005591721	0.83796188	-0.03607867	0.186870629	0.290732755	1.63E-27	0.325093234	2.35E-34	0.248357578	2.76E-20	0.079040484	0.003789327	0.198000407	2.60E-13	-0.098779793	0.000292991	0.00465268	0.864885847	0.248138538	2.99E-20
C20orf177	chromosome 20 open reading frame 177	63939	yellow	0.324191239	3.65E-34	0.587073106	6.14E-125	-0.158080563	5.96E-09	-0.029139574	0.286462323	-0.459045816	8.36E-71	-0.353025672	1.31E-40	-0.157182866	7.27E-09	-0.172524647	2.05E-10	-0.040111445	0.142229137	-0.113949093	2.90E-05	-0.389330067	9.73E-50	-0.062809353	0.021486514	0.244035122	1.28E-19	0.354015101	7.63E-41	-0.119659804	1.12E-05	0.084177991	0.002042241	-0.089573858	0.001028977	0.066239974	0.015300709	0.109094497	6.29E-05
VAMP8	vesicle-associated membrane protein 8 (endobrevin)	8673	yellow	-0.189603644	2.60E-12	-0.480427927	2.58E-78	-0.160509599	3.45E-09	-0.149461863	3.86E-08	0.66815579	4.95E-174	0.319716901	3.18E-33	0.585928292	2.42E-124	0.600999003	2.23E-132	0.174771606	1.18E-10	0.100936692	0.000214839	0.116873103	1.80E-05	0.428246449	6.94E-61	0.222918286	1.50E-16	0.211361792	5.35E-15	0.03093565	0.257783818	0.107431315	8.14E-05	-0.153910602	1.49E-08	-0.097254257	0.000363548	0.087672492	0.001315702
RPL34	ribosomal protein L34	6164	yellow	-0.130980596	1.50E-06	-0.355255557	3.88E-41	-0.160645535	3.35E-09	-0.177169103	6.53E-11	0.611631773	2.61E-138	0.347627879	2.37E-39	0.417329155	1.31E-57	0.407573958	8.84E-55	0.00851559	0.755468807	0.089098135	0.001094723	-0.071643183	0.008703264	0.487646522	5.67E-81	0.298519679	5.52E-29	0.274787669	1.22E-24	-0.039935891	0.143984645	0.093370763	0.000621121	-0.002716469	0.920863176	0.162176776	2.36E-09	-0.018121091	0.507473895
HPGDS	hematopoietic prostaglandin D synthase	27306	yellow	-0.204776113	3.75E-14	-0.198270071	2.41E-13	-0.163342877	1.81E-09	-0.010700137	0.695549636	0.332712232	5.35E-36	0.010688832	0.69585525	0.2405515	4.31E-19	0.256325802	1.51E-21	0.273109795	2.38E-24	-0.101475824	0.000198619	-0.130484753	1.65E-06	0.35867154	5.92E-42	0.332420403	6.19E-36	0.262633289	1.41E-22	0.084634081	0.001930055	0.256816747	1.26E-21	-0.091921192	0.000754791	0.030802306	0.259842013	0.321729072	1.21E-33
CACNB4	calcium channel, voltage-dependent, beta 4 subunit	785	yellow	0.346611604	4.07E-39	0.344973851	9.66E-39	-0.163677903	1.67E-09	0.12947112	1.98E-06	-0.418120146	7.68E-58	-0.251422275	9.15E-21	-0.237829873	1.10E-18	-0.111953985	4.00E-05	-0.110015003	5.44E-05	0.139535517	2.93E-07	-0.219572768	4.31E-16	-0.026847945	0.326072266	-0.005883379	0.829636411	0.184488254	1.01E-11	-0.1019814	0.000184459	0.006708307	0.806194784	0.015732769	0.565012645	0.199435071	1.73E-13	-0.061260871	0.024927157
MPEG1	macrophage expressed 1	219972	yellow	-0.274791332	1.21E-24	-0.310817851	2.11E-31	-0.167485773	6.88E-10	-0.017275265	0.527494371	0.412535811	3.31E-56	0.048341388	0.07689919	0.278041313	3.27E-25	0.302562358	9.12E-30	0.081727341	0.002754097	-0.119836845	1.09E-05	-0.079218711	0.003711013	0.411274494	7.67E-56	0.227702437	3.21E-17	0.221060102	2.70E-16	0.175718297	9.37E-11	0.242889905	1.91E-19	-0.021954121	0.421974978	0.075477135	0.005704821	0.068889784	0.01165492
ANAPC7	anaphase promoting complex subunit 7	51434	yellow	-0.003291895	0.904173407	0.027950662	0.306588254	-0.168904462	4.91E-10	0.13358288	9.23E-07	-0.297087925	1.04E-28	-0.154379684	1.35E-08	-0.030571059	0.263438247	-0.002293462	0.93315481	0.143605372	1.30E-07	0.056642515	0.03815497	-0.047957569	0.079275266	-0.15091281	2.84E-08	0.065350548	0.016731832	0.083368207	0.002256258	-0.076647149	0.004996516	0.014393619	0.598590496	-0.045679248	0.094633416	0.052387408	0.055209875	0.170911382	3.04E-10
LAT2	linker for activation of T cells family, member 2	7462	yellow	-0.254305061	3.19E-21	-0.423034313	2.64E-59	-0.169138627	4.64E-10	-0.10715707	8.49E-05	0.604111012	4.32E-134	0.235893591	2.12E-18	0.446056643	1.70E-66	0.395619304	1.93E-51	0.157782319	6.37E-09	0.08920971	0.001078964	0.046082383	0.091754641	0.474894605	2.55E-76	0.309195919	4.47E-31	0.25667283	1.33E-21	0.076555211	0.005049153	0.136074216	5.74E-07	-0.086174133	0.001591707	0.068769959	0.011801462	0.093045798	0.000649017
ACY3	aspartoacylase (aminocyclase) 3	91703	yellow	-0.257512249	9.73E-22	-0.229806767	1.61E-17	-0.169588647	4.17E-10	0.01480136	0.588271352	0.384050674	2.45E-48	0.002229739	0.935007907	0.277940695	3.40E-25	0.254876562	2.59E-21	0.215047378	1.75E-15	-0.140579659	2.38E-07	-0.118995543	1.26E-05	0.405834251	2.76E-54	0.365131699	1.59E-43	0.287688485	5.97E-27	0.080776166	0.003086693	0.254131664	3.40E-21	-0.039584618	0.147547066	0.06265702	0.02180561	0.216492234	1.12E-15
APOC2	apolipoprotein C-II	344	yellow	-0.377236313	1.44E-46	-0.502329427	1.40E-86	-0.171678823	2.52E-10	0.246977352	4.52E-20	0.517237236	1.47E-92	0.015526842	0.570116754	0.252606981	5.94E-21	0.475182832	2.01E-76	0.12205144	7.45E-06	-0.149961687	3.48E-08	-0.03110534	0.255180985	0.370200257	8.77E-45	0.231589814	8.95E-18	0.148368873	4.86E-08	0.148751073	4.49E-08	0.214519684	2.06E-15	-0.079148044	0.003741887	-0.022784341	0.404634042	0.011817603	0.665591202
ACADM	acyl-CoA dehydrogenase, C-4 to C-12 straight chain	34	yellow	0.08278263	0.002423601	-0.118908772	1.28E-05	-0.172681445	1.98E-10	-0.17451794	1.26E-10	0.329339038	2.89E-35	0.184614314	9.74E-12	0.288592076	4.07E-27	0.415130845	5.81E-57	-0.10015592	0.000240543	0.153956044	1.48E-08	0.049315757	0.071126886	0.460575967	2.52E-71	0.080673834	0.003124573	0.337312091	5.17E-37	-0.200949848	1.13E-13	-0.218690793	5.67E-16	-0.277404643	4.23E-25	-0.07819564	0.00418136	-0.096903257	0.000381888
S100Z	S100 calcium binding protein Z	170591	yellow	-0.399041464	2.21E-52	-0.46795606	7.20E-74	-0.173695708	1.54E-10	0.119377179	1.18E-05	0.501896761	2.07E-86	0.111785273	4.11E-05	0.380321683	2.30E-47	0.414465919	9.09E-57	0.090239366	0.000943113	-0.117994363	1.49E-05	-0.0620543	0.023108873	0.394770625	3.29E-51	0.246753923	4.89E-20	0.201274654	1.03E-13	0.067998586	0.012784519	0.120616183	9.54E-06	-0.103536414	0.00014662	0.002042298	0.940460816	0.035482419	0.194264527
C12orf75	chromosome 12 open reading frame 75	387882	yellow	-0.333883635	2.96E-36	-0.390192813	5.71E-50	-0.175592448	9.67E-11	-0.134686672	7.49E-07	0.477586727	2.76E-77	0.150179747	3.32E-08	0.295225287	2.34E-28	0.349574497	8.39E-40	0.112418084	3.72E-05	-0.040634234	0.137098541	-0.077307082	0.004633008	0.545250704	1.23E-104	0.26225888	1.63E-22	0.277440878	4.17E-25	-0.004343767	0.87377891	0.129398415	2.01E-06	-0.076569785	0.005040776	0.119822045	1.09E-05	0.153853852	1.51E-08
DOCK8	dedicator of cytokinesis 8	81704	yellow	-0.163818817	1.62E-09	-0.199247274	1.83E-13	-0.175856393	9.05E-11	-0.077687822	0.004434336	0.340584874	9.58E-38	0.061390132	0.024622751	0.314926983	3.10E-32	0.253437058	4.39E-21	0.236750385	1.58E-18	-0.047668745	0.081102307	-0.074962635	0.006043984	0.378813256	5.66E-47	0.285247697	1.67E-26	0.270302363	7.23E-24	0.044386954	0.104351604	0.163591179	1.71E-09	-0.137433253	4.41E-07	0.01548768	0.571089907	0.260188742	3.57E-22
KIAA0182	KIAA0182	23199	yellow	0.267278192	2.36E-23	0.547515962	1.16E-105	-0.176088511	8.55E-11	-0.050791012	0.063066709	-0.541618741	5.27E-103	-0.335890231	1.07E-36	-0.274576399	1.32E-24	-0.163915215	1.58E-09	-0.048239113	0.077526593	0.157897103	6.21E-09	-0.260885369	2.74E-22	-0.076647305	0.004996427	0.174689401	1.21E-10	0.327074633	8.87E-35	-0.168163297	5.86E-10	-0.031715706	0.245969885	-0.161853127	2.54E-09	0.111179544	4.53E-05	0.175741529	9.31E-11
HK2	hexokinase 2	3099	yellow	-0.28075681	1.08E-25	-0.404117339	8.43E-54	-0.177607158	5.85E-11	-0.161442754	2.79E-09	0.544386862	3.02E-104	0.2656056	4.51E-23	0.516953662	1.92E-92	0.411396578	7.07E-56	0.131433135	1.38E-06	0.055807811	0.041093364	0.042937799	0.116173541	0.459336461	6.66E-71	0.25469624	2.76E-21	0.265156377	5.37E-23	0.029118046	0.286818638	0.055880575	0.040829812	-0.146932249	6.56E-08	0.035924775	0.188758836	0.097640715	0.000344309
PIK3CA	phosphoinositide-3-kinase, catalytic, alpha polypeptide	5290	yellow	0.460520266	2.64E-71	0.507106175	1.83E-88	-0.179227138	3.89E-11	-0.227074071	3.94E-17	-0.428063188	7.90E-61	-0.115147758	2.39E-05	-0.051770763	0.058142355	-0.096311469	0.000414778	-0.227589639	3.33E-17	0.131961308	1.25E-06	-0.279850265	1.56E-25	0.009686004	0.723156502	0.119754435	1.11E-05	0.361322255	1.36E-42	-0.144501109	1.08E-07	-0.034366926	0.208669133	-0.008346861	0.760163976	0.217522588	8.16E-16	-0.082852692	0.002402998
PHACTR2	phosphatase and actin regulator 2	9749	yellow	0.303623804	5.66E-30	0.39723488	6.95E-52	-0.187454535	4.61E-12	-0.183199036	1.41E-11	-0.324043995	3.92E-34	-0.231377426	9.61E-18	-0.042203301	0.122554252	0.072956191	0.007546727	-0.160358347	3.57E-09	-0.028982592	0.289067417	-0.329207134	3.09E-35	0.082368324	0.002548771	0.127261099	2.97E-06	0.368998785	1.75E-44	-0.028276578	0.30098027	0.095481477	0.000465375	-0.071159117	0.009168027	0.08545982	0.001741213	-0.035242644	0.197297588
SSH1	slingshot homolog 1 (Drosophila)	54434	yellow	0.261924366	1.85E-22	0.578006168	2.76E-120	-0.188035518	3.95E-12	-0.090581349	0.000901616	-0.518770588	3.42E-93	-0.414250649	1.05E-56	-0.302664742	8.71E-30	-0.268645214	1.39E-23	-0.050751387	0.063272901	0.086653953	0.001498009	-0.300596092	2.20E-29	0.05299535	0.052440376	0.26940333	1.03E-23	0.419766395	2.50E-58	-0.0183084	0.503094852	0.172272907	2.18E-10	-0.06186445	0.023533141	0.216188334	1.23E-15	0.150791043	2.92E-08
EEF1A1P24	eukaryotic translation elongation factor 1 alpha 1 pseudogene 24	645715	yellow	-0.318545167	5.57E-33	-0.617718021	8.28E-142	-0.188086431	3.90E-12	-0.045759572	0.094054123	0.707045359	1.41E-203	0.460572617	2.53E-71	0.561453128	3.70E-112	0.588767582	7.98E-126	0.085776301	0.00167345	0.244372208	1.14E-19	0.192314829	1.25E-12	0.510559513	7.62E-90	0.141489377	1.99E-07	0.165808612	1.02E-09	-0.059961303	0.028172872	-0.088729853	0.001148263	-0.14868666	4.55E-08	0.058741008	0.031545411	0.003204248	0.906712994
LY86	lymphocyte antigen 86	9450	yellow	-0.301114083	1.74E-29	-0.373793343	1.09E-45	-0.189421775	2.73E-12	-0.053097998	0.051984406	0.493404089	3.87E-83	0.034335175	0.209090167	0.31876368	5.02E-33	0.268957253	1.23E-23	0.151954825	2.27E-08	-0.169186854	4.59E-10	-0.137987384	3.96E-07	0.457409869	2.99E-70	0.359928348	2.95E-42	0.242746976	2.01E-19	0.316663632	1.36E-32	0.447408951	6.17E-67	0.119531	1.15E-05	0.229508146	1.78E-17	0.06347324	0.02014281
CYTIP	cytohesin 1 interacting protein	9595	yellow	-0.235338269	2.55E-18	-0.337538572	4.60E-37	-0.190535647	2.02E-12	-0.049081594	0.072480659	0.389456365	9.00E-50	0.099828671	0.000252151	0.329876631	2.21E-35	0.346668173	3.95E-39	0.281197307	8.97E-26	-0.021626447	0.428937199	-0.018884955	0.489741951	0.364336687	2.49E-43	0.221141959	2.63E-16	0.184745911	9.41E-12	0.112379582	3.74E-05	0.206568757	2.22E-14	-0.057196848	0.036303793	0.062008723	0.023210117	0.295276206	2.29E-28
C1orf114	chromosome 1 open reading frame 114	57821	yellow	0.110380272	5.14E-05	0.42845597	5.99E-61	-0.191401951	1.60E-12	0.227832161	3.08E-17	-0.438019477	6.37E-64	-0.433537288	1.62E-62	-0.387663385	2.71E-49	-0.049034087	0.072757866	-0.129189446	2.09E-06	0.065479215	0.016517797	-0.310306502	2.67E-31	-0.05605123	0.040217309	0.227023362	4.01E-17	0.337767182	4.10E-37	-0.079884067	0.003431464	-0.013518743	0.621003946	-0.136211537	5.59E-07	0.086910842	0.001449956	0.078183712	0.004187148
FPR1	formyl peptide receptor 1	2357	yellow	-0.211470057	5.18E-15	-0.258875889	5.84E-22	-0.194393053	7.08E-13	-0.068024318	0.012750594	0.37462578	6.70E-46	-0.027425745	0.315764915	0.285407309	1.56E-26	0.237071365	1.42E-18	0.302272089	1.04E-29	-0.152874088	1.87E-08	-0.121474659	8.23E-06	0.380368466	2.24E-47	0.412440651	3.53E-56	0.261830934	1.92E-22	0.232082678	7.60E-18	0.430039219	1.96E-61	0.04815887	0.078021755	0.165220846	1.17E-09	0.279279155	1.97E-25
HLA-DMA	major histocompatibility complex, class II, DM alpha	3108	yellow	-0.236376096	1.80E-18	-0.337726495	4.18E-37	-0.196237081	4.25E-13	-0.119371685	1.18E-05	0.420807507	1.22E-58	0.035974912	0.188142149	0.339225841	1.93E-37	0.314750326	3.36E-32	0.12851912	2.36E-06	-0.010993848	0.687627005	0.054887355	0.044553424	0.419562453	2.87E-58	0.248601796	2.53E-20	0.221840986	2.11E-16	0.17218695	2.23E-10	0.307543912	9.54E-31	-0.082272312	0.002578609	0.039306424	0.150415807	0.072276046	0.008127407
PLCB2	phospholipase C, beta 2	5330	yellow	-0.572664495	1.30E-117	-0.381466454	1.16E-47	-0.196532314	3.92E-13	0.388436905	1.69E-49	0.420431912	1.58E-58	-0.153372818	1.68E-08	0.163051246	1.93E-09	0.378527625	6.71E-47	0.163375153	1.79E-09	-0.248807602	2.35E-20	-0.160066351	3.82E-09	0.415772809	3.77E-57	0.394724678	3.39E-51	0.337745024	4.14E-37	0.052090986	0.05660378	0.164685737	1.33E-09	-0.218131548	6.75E-16	-0.091561183	0.000791895	0.150928227	2.83E-08
CAMTA2	calmodulin binding transcription activator 2	23125	yellow	0.437025557	1.31E-63	0.363907004	3.18E-43	-0.197666549	2.85E-13	-0.041236613	0.131365006	-0.509450731	2.12E-89	-0.324872852	2.62E-34	-0.158162124	5.85E-09	-0.135062765	6.97E-07	-0.081689341	0.002766731	0.013259297	0.627720098	-0.279287091	1.97E-25	-0.238191662	9.69E-19	0.13813446	3.85E-07	0.100083702	0.000243061	0.253575056	4.17E-21	0.325495609	1.93E-34	0.311855213	1.30E-31	0.419297756	3.44E-58	-0.072347346	0.008064713
SCIN	scinderin	85477	yellow	-0.385670327	9.16E-49	-0.589466151	3.43E-126	-0.199903918	1.52E-13	0.045855431	0.093366524	0.580119632	2.34E-121	0.247036868	4.42E-20	0.447486008	5.82E-67	0.452369278	1.44E-68	0.160270259	3.64E-09	0.017641457	0.518777554	0.034255793	0.2101455	0.456145867	7.95E-70	0.171847768	2.42E-10	0.183860478	1.19E-11	0.037925278	0.165290364	0.085242455	0.001789205	-0.076369169	0.005157201	0.080889944	0.003045067	0.096039722	0.000430749
MS4A6E	membrane-spanning 4-domains, subfamily A, member 6E	245802	yellow	-0.196473425	3.98E-13	-0.310841429	2.09E-31	-0.202274903	7.72E-14	-0.104968919	0.000118337	0.37437855	7.74E-46	0.085050117	0.00183268	0.300742763	2.06E-29	0.325402655	2.02E-34	0.158687618	5.20E-09	0.0166128	0.543450982	-0.012903553	0.636979299	0.383043503	4.50E-48	0.215083641	1.73E-15	0.214082847	2.35E-15	0.086677788	0.001493489	0.141195941	2.11E-07	-0.152961498	1.83E-08	0.02923259	0.284926245	0.216155955	1.24E-15
CXCL16	chemokine (C-X-C motif) ligand 16	58191	yellow	-0.172131334	2.26E-10	-0.243095426	1.78E-19	-0.204726178	3.80E-14	-0.106342264	9.61E-05	0.332484408	6.00E-36	0.027776826	0.309607528	0.30646729	1.56E-30	0.34011805	1.22E-37	0.294593282	3.09E-28	-0.001038382	0.969707169	-0.022551015	0.409464035	0.335132804	1.57E-36	0.322021021	1.05E-33	0.25054658	1.26E-20	0.112238346	3.83E-05	0.284024269	2.78E-26	-0.059766004	0.028690805	0.075917048	0.005428529	0.315310721	2.58E-32
RAB11FIP2	RAB11 family interacting protein 2 (class I)	22841	yellow	0.110430037	5.10E-05	0.430886247	1.07E-61	-0.205534397	3.01E-14	0.399517437	1.63E-52	-0.517473116	1.17E-92	-0.372795558	1.95E-45	-0.31508428	2.87E-32	-0.089698006	0.00101243	-0.134078171	8.40E-07	0.019921186	0.466229919	-0.383524253	3.36E-48	-0.077255614	0.004660473	0.178637791	4.51E-11	0.335041874	1.65E-36	-0.028028056	0.305250329	0.036209802	0.185272731	-0.02869169	0.293936929	0.15433754	1.36E-08	-0.031033453	0.256281415
RERE	arginine-glutamic acid dipeptide (RE) repeats	473	yellow	0.195279072	5.54E-13	0.390726018	4.10E-50	-0.211758328	4.75E-15	-0.06079036	0.026062848	-0.470791828	7.29E-75	-0.298685292	5.13E-29	-0.204987805	3.53E-14	-0.146722952	6.85E-08	-0.06751664	0.013434846	0.111333769	4.42E-05	-0.228754177	2.28E-17	-0.094539195	0.000529765	0.207535332	1.67E-14	0.245089034	8.82E-20	0.056974122	0.037038183	0.188311855	3.67E-12	0.198544628	2.23E-13	0.415242367	5.39E-57	0.053925366	0.048428792
KIAA1841	KIAA1841	84542	yellow	0.420533056	1.48E-58	0.453891301	4.51E-69	-0.211877901	4.58E-15	-0.224078857	1.03E-16	-0.440395875	1.12E-64	-0.120752923	9.32E-06	0.026076852	0.340164189	-0.088459908	0.00118903	-0.150320394	3.22E-08	0.100348836	0.000233937	-0.31145943	1.57E-31	-0.10041021	0.000231871	0.170368829	3.46E-10	0.351935297	2.36E-40	-0.041504391	0.128876657	0.091527895	0.00079541	0.078346639	0.004108701	0.272894163	2.59E-24	-0.028809608	0.291956469
GPR183	G protein-coupled receptor 183	1880	yellow	-0.334125027	2.62E-36	-0.435442571	4.12E-63	-0.215106764	1.72E-15	-0.094062642	0.0005654	0.457253125	3.37E-70	0.09996495	0.000247255	0.34177095	5.17E-38	0.286298446	1.07E-26	0.10439217	0.000129043	-0.096583814	0.000399326	-0.03856534	0.158265061	0.466136407	3.09E-73	0.216380633	1.16E-15	0.192508757	1.19E-12	0.228977568	2.12E-17	0.282121323	6.13E-26	0.009767526	0.72092337	0.129221374	2.08E-06	0.086580084	0.001512095
TAF4B	TAF4b RNA polymerase II, TATA box binding protein (TBP)-associated factor, 105kDa	6875	yellow	0.337539015	4.60E-37	0.413309923	1.97E-56	-0.215153168	1.69E-15	-0.006888292	0.801102462	-0.456078519	8.37E-70	-0.286663491	9.20E-27	-0.092364838	0.000711287	-0.062788734	0.021529465	-0.118126477	1.46E-05	0.096991232	0.000377212	-0.207719007	1.58E-14	-0.036852093	0.177591781	0.091883153	0.000758634	0.314734081	3.39E-32	-0.012927784	0.636346811	0.091414799	0.00080746	0.012684512	0.642708863	0.199208091	1.85E-13	-0.03729508	0.17243394
SUPV3L1	suppressor of var1, 3-like 1 (S. cerevisiae)	6832	yellow	0.249048196	2.16E-20	0.328691775	3.99E-35	-0.217553894	8.08E-16	-0.102226698	0.000177936	-0.465975998	3.52E-73	-0.266150834	3.66E-23	-0.191078373	1.75E-12	-0.220684529	3.04E-16	-0.067401679	0.013594219	-0.045076812	0.09906966	-0.384282824	2.13E-48	-0.117455861	1.63E-05	0.272156741	3.47E-24	0.216462204	1.13E-15	0.21740013	8.47E-16	0.390079118	6.12E-50	0.366704849	6.50E-44	0.529908115	7.00E-98	0.047664404	0.081130022
POM121B	POM121 membrane glycoprotein B (pseudogene)	100288540	yellow	0.14129731	2.06E-07	0.368476021	2.36E-44	-0.217675876	7.78E-16	0.202114259	8.09E-14	-0.542508985	2.11E-103	-0.396022142	1.50E-51	-0.208773104	1.16E-14	-0.086854209	0.001460426	-0.063196978	0.020692797	0.198651007	2.16E-13	-0.140086175	2.62E-07	-0.236148978	1.94E-18	0.181363956	2.26E-11	0.228423766	2.54E-17	0.114755993	2.55E-05	0.116495821	1.91E-05	0.002254815	0.934278668	0.232003848	7.80E-18	0.007300387	0.789475162
RPL13	ribosomal protein L13	6137	yellow	-0.31642573	1.53E-32	-0.404225445	7.86E-54	-0.227606533	3.31E-17	-0.014478473	0.596436255	0.677239317	1.59E-180	0.151821385	2.34E-08	0.458128925	1.71E-70	0.524118405	2.02E-95	0.140089113	2.62E-07	0.107577009	7.96E-05	0.050077872	0.066863538	0.620206982	2.92E-143	0.383686738	3.05E-48	0.40901417	3.43E-55	0.039313905	0.150338109	0.128616264	2.32E-06	-0.305645934	2.27E-30	-0.088173539	0.001233736	0.093476281	0.000612305
SYK	spleen tyrosine kinase	6850	yellow	-0.255896118	1.77E-21	-0.240070076	5.08E-19	-0.229125881	2.02E-17	-0.015417075	0.572846381	0.316320091	1.60E-32	0.000308767	0.990990321	0.290446134	1.85E-27	0.272860577	2.63E-24	0.303713202	5.43E-30	-0.046625786	0.087985913	-0.102141059	0.000180188	0.41168712	5.83E-56	0.345085827	9.11E-39	0.309966816	3.13E-31	0.09716388	0.00036819	0.273408191	2.11E-24	-0.138397605	3.66E-07	0.048814195	0.074052276	0.363892571	3.20E-43
HBA1	hemoglobin, alpha 1	3039	yellow	-0.118781366	1.30E-05	-0.33261192	5.62E-36	-0.231538793	9.11E-18	-0.091844117	0.000762597	0.436118399	2.53E-63	0.120825864	9.20E-06	0.48780188	4.97E-81	0.544433062	2.88E-104	0.111007857	4.65E-05	0.042291297	0.121775695	0.002639147	0.923108652	0.384771953	1.58E-48	0.243485633	1.55E-19	0.260828623	2.80E-22	0.085389952	0.001756509	0.185799027	7.14E-12	-0.167167446	7.41E-10	0.001061906	0.969021228	0.008255718	0.762703896
HBA2	hemoglobin, alpha 2	3040	yellow	-0.12069815	9.41E-06	-0.323972313	4.06E-34	-0.233414216	4.88E-18	-0.093346186	0.000623191	0.446365043	1.35E-66	0.105418728	0.000110574	0.488179004	3.59E-81	0.548389604	4.63E-106	0.123623151	5.66E-06	0.022538667	0.40972059	-0.012534326	0.646649657	0.410409431	1.36E-55	0.259227636	5.12E-22	0.28113265	9.21E-26	0.085165141	0.001806565	0.190770824	1.90E-12	-0.176905172	6.97E-11	-0.006847297	0.80226159	0.025930004	0.34289144
CCL5	chemokine (C-C motif) ligand 5	6352	yellow	-0.207921539	1.49E-14	-0.241099173	3.56E-19	-0.233535477	4.68E-18	-0.101853395	0.000187952	0.273341415	2.17E-24	0.013048109	0.633209893	0.291768757	1.05E-27	0.27820247	3.06E-25	0.323750293	4.52E-34	-0.000808565	0.976409414	-0.041616796	0.127843084	0.353177961	1.20E-40	0.299305945	3.90E-29	0.236334354	1.82E-18	0.112292502	3.79E-05	0.270934991	5.64E-24	-0.067459205	0.013514262	0.110521421	5.03E-05	0.384798347	1.56E-48
FCGR2A	Fc fragment of IgG, low affinity IIa, receptor (CD32)	2212	yellow	-0.281240557	8.81E-26	-0.361474957	1.24E-42	-0.24327094	1.67E-19	-0.124866528	4.55E-06	0.450918884	4.36E-68	0.10400736	0.000136686	0.407740293	7.92E-55	0.359083889	4.71E-42	0.19841792	2.31E-13	-0.069463896	0.010974936	-0.070204331	0.01015007	0.474904184	2.53E-76	0.286750296	8.87E-27	0.272783499	2.71E-24	0.144916753	9.93E-08	0.282899546	4.44E-26	-0.070539373	0.009795292	0.083647768	0.002180157	0.222360339	1.79E-16
GAL3ST4	galactose-3-O-sulfotransferase 4	79690	yellow	-0.308581556	5.92E-31	-0.21260551	3.68E-15	-0.248175932	2.95E-20	0.027914911	0.307207606	0.276567957	5.94E-25	-0.122734708	6.62E-06	0.206974157	1.97E-14	0.275357275	9.67E-25	0.158060711	5.99E-09	-0.131555938	1.35E-06	-0.161946914	2.49E-09	0.381812133	9.44E-48	0.390680417	4.22E-50	0.328248784	4.97E-35	0.145344881	9.10E-08	0.313928549	4.95E-32	-0.099377187	0.000269029	0.09516602	0.000486072	0.212300619	4.03E-15
NAA16	N(alpha)-acetyltransferase 16, NatA auxiliary subunit	79612	yellow	-0.164981535	1.24E-09	-0.284085761	2.71E-26	-0.249438079	1.87E-20	-0.1605389	3.43E-09	0.260256276	3.48E-22	0.236776394	1.57E-18	0.248029441	3.11E-20	0.19117923	1.70E-12	-0.010616863	0.697801999	0.132788526	1.07E-06	-0.058160591	0.033267295	0.399308248	1.86E-52	0.186151359	6.51E-12	0.243897856	1.34E-19	-0.010498317	0.701012966	0.08599538	0.00162797	0.108597494	6.79E-05	0.41285358	2.68E-56	0.019679073	0.471666751
LGALS9C	lectin, galactoside-binding, soluble, 9C	654346	yellow	-0.2147533	1.91E-15	-0.467265616	1.25E-73	-0.249983039	1.54E-20	-0.153425685	1.66E-08	0.579461204	5.06E-121	0.215243467	1.65E-15	0.57830961	1.94E-120	0.603878853	5.81E-134	0.143159192	1.42E-07	0.168316118	5.65E-10	0.1415832	1.95E-07	0.406277984	2.07E-54	0.276046225	7.33E-25	0.244550457	1.07E-19	0.156743364	8.02E-09	0.192079675	1.33E-12	-0.173710617	1.54E-10	-0.021685969	0.427667581	0.035462662	0.19451314
GOLGA8C	golgin A8 family, member C	729786	yellow	0.244228499	1.19E-19	0.22599736	5.58E-17	-0.253440656	4.38E-21	-0.140005695	2.67E-07	-0.446316571	1.40E-66	-0.168144081	5.88E-10	-0.02945253	0.281316267	-0.04350707	0.111409929	-0.028061344	0.304676052	0.098916055	0.000287356	-0.216001555	1.30E-15	-0.112598164	3.61E-05	0.078942975	0.003832806	0.162222746	2.34E-09	0.154730178	1.25E-08	0.246418693	5.51E-20	0.226146076	5.32E-17	0.427672631	1.04E-60	0.033457406	0.220974169
PAR5	Prader-Willi/Angelman syndrome-5	8123	yellow	0.3759801	3.03E-46	0.538629307	1.12E-101	-0.255228121	2.27E-21	0.032848396	0.229498834	-0.614076832	1.05E-139	-0.334265708	2.44E-36	-0.248718793	2.43E-20	-0.179234905	3.88E-11	-0.229818229	1.61E-17	0.020733673	0.448241328	-0.481058651	1.52E-78	-0.011097839	0.684830058	0.136152878	5.65E-07	0.388443935	1.68E-49	-0.101191034	0.000207038	0.067154212	0.013942962	0.004169645	0.878798676	0.32304799	6.37E-34	-0.041125023	0.132412889
CD69	CD69 molecule	969	yellow	-0.224675589	8.54E-17	-0.381717733	9.99E-48	-0.255629202	1.96E-21	-0.182175713	1.83E-11	0.418586557	5.59E-58	0.156414706	8.62E-09	0.43337476	1.82E-62	0.314724371	3.40E-32	0.143961001	1.21E-07	0.003938025	0.885483556	-0.029153578	0.286230699	0.468117195	6.32E-74	0.233806617	4.28E-18	0.242728136	2.02E-19	0.085654736	0.001699187	0.163855769	1.61E-09	-0.098517999	0.000304109	0.089580176	0.001028129	0.198265427	2.41E-13
NCRNA00188	non-protein coding RNA 188	125144	yellow	-0.302024939	1.16E-29	-0.403926293	9.54E-54	-0.268405222	1.52E-23	-0.073573747	0.007051968	0.466028101	3.37E-73	0.142312535	1.68E-07	0.261049837	2.58E-22	0.384151079	2.30E-48	0.066354438	0.015124581	0.182349092	1.75E-11	0.055977455	0.040481132	0.5213812	2.82E-94	0.247969688	3.17E-20	0.317787253	7.99E-33	-0.133034279	1.02E-06	-0.043570532	0.110888567	-0.277054757	4.87E-25	0.027293574	0.318103636	0.131568391	1.35E-06
RPS28	ribosomal protein S28	6234	yellow	-0.143353814	1.36E-07	-0.348690937	1.35E-39	-0.273299004	2.21E-24	-0.121280515	8.51E-06	0.584927038	7.99E-124	0.234756943	3.11E-18	0.519410006	1.86E-93	0.563744038	2.96E-113	0.040212352	0.141227539	0.05205031	0.056797319	-0.134156003	8.28E-07	0.53971154	3.71E-102	0.366126949	9.04E-44	0.415070267	6.05E-57	-0.008370382	0.759508931	0.151491186	2.51E-08	-0.198254298	2.42E-13	0.020295182	0.457900287	0.034089435	0.212369595
HLA-DRB1	major histocompatibility complex, class II, DR beta 1	3123	yellow	-0.269679284	9.24E-24	-0.409502598	2.48E-55	-0.296055196	1.63E-28	-0.144905276	9.95E-08	0.377945638	9.48E-47	0.039582536	0.147568384	0.323342282	5.52E-34	0.285025129	1.83E-26	0.212225498	4.12E-15	0.020620394	0.450725463	-0.024285831	0.374374695	0.428533937	5.67E-61	0.32101967	1.70E-33	0.210957866	6.04E-15	0.299244771	4.00E-29	0.446431228	1.28E-66	0.139054829	3.22E-07	0.324604844	2.98E-34	0.151038762	2.77E-08
TRIM34	tripartite motif-containing 34	53840	yellow	-0.37034049	8.09E-45	-0.419740325	2.54E-58	-0.301190032	1.69E-29	-0.086997695	0.001434034	0.466774319	1.86E-73	0.064516543	0.018179083	0.457903192	2.03E-70	0.520282111	8.10E-94	0.104831784	0.000120804	-0.017379817	0.524998034	-0.022959031	0.401040215	0.483513935	1.92E-79	0.384470758	1.90E-48	0.350037171	6.55E-40	0.099544203	0.000262666	0.166043141	9.66E-10	-0.206698248	2.14E-14	0.014949256	0.584548808	0.096956406	0.000379057
RGPD1	RANBP2-like and GRIP domain containing 1	400966	yellow	0.18366269	1.25E-11	0.451423457	2.97E-68	-0.319198181	4.07E-33	0.074938509	0.006060325	-0.620415955	2.20E-143	-0.476549025	6.52E-77	-0.256560141	1.39E-21	-0.168404755	5.53E-10	-0.226843115	4.25E-17	-0.02169289	0.427520085	-0.393905937	5.66E-51	-0.105775774	0.000104756	0.242062713	2.55E-19	0.341013902	7.66E-38	0.096063115	0.000429352	0.229977667	1.53E-17	0.107687357	7.82E-05	0.392035448	1.82E-50	-0.106856779	8.89E-05
FEM1A	fem-1 homolog a (C. elegans)	55527	turquoise	-0.037331056	0.172020027	0.12180536	7.77E-06	0.000670997	0.980422202	0.11737308	1.65E-05	-0.090455263	0.000916714	-0.186882744	5.37E-12	-0.130005353	1.80E-06	-0.119171036	1.22E-05	0.249732937	1.68E-20	0.086746418	0.001480546	0.078826384	0.003885386	-0.059634123	0.029045169	0.332763182	5.21E-36	0.077832462	0.004360906	0.039062734	0.152963473	0.099941987	0.000248074	-0.039600822	0.147381268	0.029301613	0.283789974	0.229545377	1.76E-17
BTC	betacellulin	685	turquoise	-0.116863747	1.80E-05	0.193789656	8.36E-13	-0.113000992	3.38E-05	0.116169215	2.02E-05	-0.088743996	0.001146163	-0.336899165	6.39E-37	-0.137313441	4.52E-07	-0.015867194	0.56169268	0.11172131	4.15E-05	-0.174699906	1.21E-10	-0.194413765	7.04E-13	0.000685913	0.979987063	0.564857606	8.59E-114	0.240823126	3.92E-19	0.111617912	4.22E-05	0.246046568	6.29E-20	-0.019189452	0.482767507	0.055601139	0.04184979	0.197685643	2.84E-13
SMARCA4	SWI/SNF related, matrix associated, actin dependent regulator of chromatin, subfamily a, member 4	6597	turquoise	-0.117389382	1.65E-05	0.081064306	0.002982268	-0.17056728	3.30E-10	0.096784671	0.000388277	0.042389929	0.120907627	-0.294922532	2.67E-28	-0.031558534	0.24831922	0.100522578	0.000228133	0.112396267	3.73E-05	-0.100005745	0.000245806	-0.206061668	2.58E-14	0.057410678	0.03561044	0.747216878	1.08E-239	0.332784407	5.16E-36	0.094092501	0.000563104	0.25769859	9.08E-22	-0.086946053	0.001443481	0.068119681	0.012625556	0.114018159	2.87E-05
NDP	Norrie disease (pseudoglioma)	4693	turquoise	-0.217612724	7.93E-16	-0.224142804	1.01E-16	-0.179691024	3.46E-11	-0.026760262	0.327655324	0.137984581	3.97E-07	-0.040928953	0.134269717	0.14846063	4.77E-08	0.253955044	3.63E-21	0.227220456	3.76E-17	0.077262491	0.004656795	0.0827083	0.002445635	0.070806638	0.009520244	0.436806416	1.54E-63	0.108864237	6.52E-05	-0.034677497	0.204583154	0.146734643	6.83E-08	-0.067430695	0.013553837	0.079059857	0.003780743	0.192551505	1.17E-12
TMSL3	thymosin-like 3	7117	turquoise	-0.286651413	9.25E-27	-0.083415872	0.002243114	-0.197379914	3.09E-13	0.17991515	3.27E-11	0.237910712	1.07E-18	-0.111585682	4.25E-05	0.132466655	1.14E-06	0.192404081	1.22E-12	0.116367869	1.95E-05	-0.142468456	1.63E-07	-0.285779727	1.33E-26	0.360037002	2.77E-42	0.471901401	2.96E-75	0.41581825	3.65E-57	0.221900616	2.07E-16	0.294645868	3.02E-28	-0.109227379	6.16E-05	0.075506975	0.005685686	0.158402212	5.55E-09
SPTY2D1	SPT2, Suppressor of Ty, domain containing 1 (S. cerevisiae)	144108	turquoise	-0.107322162	8.27E-05	0.020683966	0.449330409	-0.212302082	4.03E-15	-0.003898842	0.886615255	-0.066112717	0.015498636	-0.201658129	9.22E-14	-0.013738431	0.615341495	0.040515041	0.138255551	0.18007103	3.14E-11	0.007551501	0.782412678	-0.125123722	4.35E-06	0.03995912	0.143751413	0.647423494	4.81E-160	0.247343854	3.97E-20	0.09126111	0.000824106	0.308371097	6.53E-31	0.087599877	0.001327989	0.309299051	4.26E-31	0.208585623	1.23E-14
CNPY3	canopy 3 homolog (zebrafish)	10695	turquoise	-0.200530024	1.27E-13	0.050074202	0.066883554	-0.25629483	1.53E-21	-0.020967875	0.443130121	0.158207406	5.79E-09	-0.265022338	5.65E-23	0.152720142	1.93E-08	0.177920633	5.41E-11	0.211536167	5.08E-15	-0.012288755	0.653114673	-0.091710746	0.00077628	0.326978424	9.31E-35	0.548691089	3.37E-106	0.51300366	7.86E-91	-0.055732506	0.04136763	0.166547465	8.58E-10	-0.319277608	3.92E-33	-0.072892373	0.007599587	0.289783151	2.45E-27
LMTK2	lemur tyrosine kinase 2	22853	turquoise	-0.02054734	0.452331615	0.219399461	4.55E-16	-0.286917309	8.27E-27	0.005433923	0.842473884	-0.147713127	5.57E-08	-0.413139854	2.21E-56	-0.062063508	0.023088465	0.0115603	0.67244434	0.103436774	0.000148807	-0.108071913	7.37E-05	-0.27410912	1.60E-24	0.084303336	0.002010828	0.786442044	2.95E-282	0.41318224	2.15E-56	0.164369253	1.43E-09	0.366863828	5.94E-44	-0.051257464	0.060680918	0.220271756	3.46E-16	0.165814791	1.02E-09
AFF3	AF4/FMR2 family, member 3	3899	turquoise	-0.106574222	9.28E-05	0.173410447	1.65E-10	-0.304629009	3.59E-30	0.094497068	0.000532829	-0.216255281	1.21E-15	-0.510223839	1.04E-89	-0.156735819	8.03E-09	-0.081243759	0.00291887	0.147167729	6.24E-08	-0.082332152	0.002559975	-0.240175922	4.90E-19	0.134580595	7.64E-07	0.596529829	5.97E-130	0.394163472	4.82E-51	0.086339824	0.001558759	0.364214457	2.67E-43	-0.125760412	3.88E-06	0.169298459	4.47E-10	0.269415894	1.02E-23
LOC149832	hypothetical protein LOC149832	149832	turquoise	-0.157856173	6.26E-09	-0.010586909	0.698612825	-0.332784046	5.16E-36	-0.019610137	0.47322114	0.022453233	0.411498312	-0.293447796	5.07E-28	0.104432931	0.000128257	0.208976678	1.09E-14	0.187959181	4.04E-12	0.025950587	0.342508332	-0.131246798	1.43E-06	0.127547956	2.82E-06	0.836827401	0	0.420477453	1.53E-58	0.067152644	0.013945197	0.344744912	1.09E-38	-0.105720359	0.00010564	0.198136945	2.50E-13	0.182472083	1.70E-11
CABP7	calcium binding protein 7	164633	turquoise	-0.183380438	1.34E-11	0.030928341	0.257896346	-0.364528613	2.24E-43	-0.00200295	0.941605869	0.018355828	0.501989226	-0.304780299	3.36E-30	0.121807084	7.77E-06	0.14843471	4.79E-08	0.091156484	0.000835619	-0.071316064	0.00901497	-0.275738046	8.30E-25	0.261801823	1.94E-22	0.775654141	1.08E-269	0.516989503	1.86E-92	0.117591797	1.59E-05	0.350202204	5.99E-40	-0.086861457	0.001459082	0.226999928	4.04E-17	0.16472777	1.31E-09
LOC400590	hypothetical LOC400590	400590	turquoise	-0.054728386	0.045175194	0.07011252	0.010249264	-0.381066182	1.48E-47	-0.047790948	0.080325152	0.054734383	0.045151607	-0.237635304	1.17E-18	0.161962048	2.48E-09	0.248590154	2.54E-20	-0.033921394	0.21463339	-0.150092109	3.38E-08	-0.485245267	4.42E-80	0.418736347	5.05E-58	0.535449168	2.79E-100	0.556225878	1.10E-109	0.228229051	2.71E-17	0.46267277	4.85E-72	-0.067316403	0.013713516	0.253157333	4.86E-21	0.082802446	0.002417758
PPM1F	protein phosphatase, Mg2+/Mn2+ dependent, 1F	9647	turquoise	-0.138684997	3.46E-07	0.040183747	0.141510919	-0.390568781	4.52E-50	-0.020893126	0.44475782	-0.021175949	0.438617178	-0.331223607	1.13E-35	0.115792857	2.15E-05	0.222870422	1.52E-16	0.161345406	2.86E-09	-0.014331456	0.6001709	-0.223292846	1.33E-16	0.174770738	1.18E-10	0.867286741	0	0.506771253	2.49E-88	0.093981171	0.000571711	0.403249359	1.48E-53	-0.112342786	3.76E-05	0.23986399	5.46E-19	0.2115337	5.08E-15
IL26	interleukin 26	55801	turquoise	-0.132804459	1.07E-06	-0.008974465	0.742745797	-0.397588542	5.56E-52	-0.100417355	0.000231631	0.018022777	0.509780311	-0.27741962	4.20E-25	0.146317526	7.45E-08	0.158272905	5.71E-09	0.081041701	0.002990343	-0.112783181	3.51E-05	-0.355082582	4.26E-41	0.358994126	4.95E-42	0.530428372	4.18E-98	0.468505605	4.63E-74	0.231373787	9.62E-18	0.478998709	8.53E-78	-0.091806185	0.000766465	0.247430018	3.85E-20	0.251373942	9.31E-21
TMED10P1	transmembrane emp24-like trafficking protein 10 (yeast) pseudogene 1	286102	turquoise	-0.313294123	6.66E-32	-0.19744072	3.04E-13	-0.425199109	5.87E-60	-0.066714046	0.014582798	0.054963938	0.044256469	-0.24516122	8.60E-20	0.246106286	6.16E-20	0.244373406	1.14E-19	0.164567798	1.36E-09	-0.11270983	3.55E-05	-0.206841559	2.05E-14	0.216455849	1.13E-15	0.760946586	1.19E-253	0.393135372	9.17E-51	0.221358072	2.46E-16	0.497973976	6.90E-85	0.013680522	0.616831889	0.303612676	5.69E-30	0.198792289	2.08E-13
PRPF40B	PRP40 pre-mRNA processing factor 40 homolog B (S. cerevisiae)	25766	turquoise	-0.034395423	0.208291778	0.197616556	2.89E-13	-0.426465521	2.42E-60	-0.081882139	0.002703173	-0.18731753	4.78E-12	-0.400641658	7.93E-53	0.085768327	0.001675127	0.128745758	2.27E-06	0.117950159	1.50E-05	0.074610714	0.006286313	-0.226782921	4.33E-17	0.197347266	3.12E-13	0.600988749	2.26E-132	0.539678376	3.84E-102	0.043379372	0.112464875	0.295044197	2.54E-28	-0.24071592	4.07E-19	0.125945969	3.75E-06	0.292700085	7.01E-28
MARCH10	membrane-associated ring finger (C3HC4) 10	162333	turquoise	-0.224545216	8.91E-17	-0.116474147	1.92E-05	-0.430584047	1.33E-61	0.016058118	0.556993553	-0.020222835	0.459505057	-0.322249545	9.38E-34	0.10645739	9.44E-05	0.215903083	1.35E-15	0.15124922	2.64E-08	-0.102251856	0.000177279	-0.284428476	2.35E-26	0.270858174	5.81E-24	0.620160305	3.11E-143	0.407319856	1.04E-54	0.23042123	1.32E-17	0.490212783	6.22E-82	-0.08167905	0.002770161	0.234963466	2.90E-18	0.285209257	1.69E-26
CECR4	cat eye syndrome chromosome region, candidate 4 (non-protein coding)	100130717	turquoise	-0.145835641	8.22E-08	-0.016083897	0.556360553	-0.438063928	6.16E-64	-0.080940635	0.003026687	0.046380919	0.089668437	-0.366751838	6.33E-44	0.163612897	1.70E-09	0.174535241	1.26E-10	0.164556241	1.37E-09	-0.023274559	0.394597751	-0.241794509	2.80E-19	0.437810104	7.41E-64	0.615687732	1.24E-140	0.527219074	9.85E-97	0.391811971	2.09E-50	0.544402275	2.98E-104	-0.143142373	1.42E-07	0.267580221	2.10E-23	0.270064771	7.94E-24
TRIOBP	TRIO and F-actin binding protein	11078	turquoise	-0.174885499	1.15E-10	-0.004045605	0.882377617	-0.454148406	3.70E-69	-0.14112465	2.14E-07	-0.044225833	0.105616865	-0.360895101	1.72E-42	0.164912868	1.26E-09	0.198903287	2.02E-13	0.099760045	0.000254651	-0.074271334	0.006528245	-0.293989719	4.01E-28	0.322286357	9.21E-34	0.613928452	1.27E-139	0.520404806	7.20E-94	0.230956889	1.10E-17	0.539734449	3.63E-102	-0.065121139	0.01711949	0.315084419	2.87E-32	0.239016326	7.31E-19
RN28S1	RNA, 28S ribosomal 1	100008589	turquoise	-0.137523268	4.34E-07	0.081228084	0.002924358	-0.455567569	1.24E-69	-0.054561968	0.045833915	-0.055921135	0.040683526	-0.47375205	6.52E-76	0.097590822	0.000346738	0.159286356	4.55E-09	-0.030912764	0.258136265	-0.137263205	4.56E-07	-0.377675811	1.11E-46	0.425162801	6.02E-60	0.616593955	3.72E-141	0.599378338	1.71E-131	0.412160838	4.25E-56	0.538742185	9.97E-102	-0.090714481	0.000885923	0.330408037	1.70E-35	0.04080112	0.135491119
HHEX	hematopoietically expressed homeobox	3087	turquoise	-0.26561408	4.50E-23	-0.23500061	2.86E-18	-0.458615819	1.17E-70	-0.11037411	5.14E-05	0.268614963	1.40E-23	-0.135091078	6.93E-07	0.396226027	1.32E-51	0.455785588	1.05E-69	0.032770207	0.230609998	-0.072024824	0.008351792	-0.265987694	3.89E-23	0.476841373	5.12E-77	0.669936029	2.76E-175	0.540912603	1.09E-102	0.131578227	1.34E-06	0.329489974	2.68E-35	-0.238128052	9.90E-19	0.115181991	2.37E-05	0.125873966	3.80E-06
REP15	RAB15 effector protein	387849	turquoise	-0.021778463	0.425698985	0.241538581	3.06E-19	-0.461723775	1.02E-71	-0.034087953	0.212389489	-0.253851182	3.77E-21	-0.403992609	9.14E-54	0.083872508	0.00212069	0.136804689	4.99E-07	0.056012302	0.040356334	-0.026616838	0.330255462	-0.396361326	1.21E-51	0.123505571	5.78E-06	0.817362155	9.88131291682493e-323	0.59964436	1.23E-131	0.150189769	3.31E-08	0.434700991	7.02E-63	-0.069940753	0.010437159	0.312975308	7.73E-32	0.171845355	2.42E-10
HCG9	HLA complex group 9	10255	turquoise	-0.167495199	6.86E-10	-0.073985722	0.006738295	-0.462478436	5.65E-72	-0.106723231	9.07E-05	-0.051110937	0.061422187	-0.301948331	1.20E-29	0.127955529	2.62E-06	0.167270923	7.24E-10	0.105132262	0.00011546	-0.025167604	0.357274138	-0.266731858	2.92E-23	0.249804113	1.64E-20	0.729213813	1.06E-222	0.43554981	3.81E-63	0.211543275	5.07E-15	0.500471487	7.44E-86	-0.024406464	0.372005817	0.355430088	3.52E-41	0.242422652	2.25E-19
PIK3AP1	phosphoinositide-3-kinase adaptor protein 1	118788	turquoise	-0.190166742	2.24E-12	-0.018352522	0.50206627	-0.468821216	3.59E-74	-0.058686985	0.031702386	-0.036350045	0.183575014	-0.361838026	1.02E-42	0.116061138	2.05E-05	0.200804327	1.18E-13	0.000814192	0.976245285	-0.087343282	0.00137226	-0.329472692	2.71E-35	0.270011435	8.11E-24	0.850413185	0	0.524020628	2.22E-95	0.191281466	1.66E-12	0.442725284	2.02E-65	-0.116245385	1.99E-05	0.286132742	1.15E-26	0.150417924	3.16E-08
EIF4BP3	eukaryotic translation initiation factor 4B pseudogene 3	100128771	turquoise	-0.198476062	2.27E-13	-0.102751347	0.000164704	-0.471490872	4.13E-75	-0.144512236	1.08E-07	-0.048176207	0.077914554	-0.271248338	4.98E-24	0.191774033	1.45E-12	0.123978053	5.32E-06	0.138530903	3.56E-07	-0.040814841	0.135359609	-0.241533488	3.06E-19	0.242427722	2.24E-19	0.690150141	3.64E-190	0.420274245	1.76E-58	0.205246597	3.27E-14	0.489757347	9.22E-82	0.042787769	0.11745523	0.415010075	6.30E-57	0.266962756	2.67E-23
GPR179	G protein-coupled receptor 179	440435	turquoise	-0.162500848	2.19E-09	0.024082979	0.378379082	-0.479594907	5.18E-78	-0.055436654	0.042460199	-0.043278895	0.113300453	-0.355194758	4.01E-41	0.151150384	2.70E-08	0.232688884	6.21E-18	0.056136318	0.039914834	-0.042147268	0.123052035	-0.323977393	4.05E-34	0.275544929	8.97E-25	0.906757091	0	0.581564654	4.28E-122	0.210631504	6.66E-15	0.486921219	1.06E-80	-0.049493039	0.070115789	0.364888102	1.82E-43	0.146883394	6.62E-08
CISH	cytokine inducible SH2-containing protein	1154	turquoise	-0.149306002	3.99E-08	0.013905222	0.611057695	-0.495130732	8.51E-84	-0.092821779	0.00066892	-0.028883239	0.290724379	-0.334487912	2.18E-36	0.140156709	2.59E-07	0.22245312	1.74E-16	0.02676003	0.327659506	0.021022316	0.441946787	-0.30065387	2.14E-29	0.323499643	5.11E-34	0.883938693	0	0.585644845	3.39E-124	0.174307201	1.33E-10	0.426592596	2.22E-60	-0.128208887	2.50E-06	0.323617268	4.83E-34	0.15903731	4.81E-09
SLAMF7	SLAM family member 7	57823	turquoise	-0.189796723	2.47E-12	-0.01194004	0.66233987	-0.519205155	2.26E-93	-0.081710727	0.002759614	-0.040594427	0.137484114	-0.375822438	3.32E-46	0.152851718	1.88E-08	0.230652961	1.22E-17	-0.014171017	0.604258518	-0.061654394	0.024010419	-0.351349149	3.23E-40	0.311693084	1.41E-31	0.915541929	0	0.587826401	2.48E-125	0.263410012	1.05E-22	0.502309596	1.43E-86	-0.047903311	0.079615916	0.390593497	4.46E-50	0.094323252	0.000545646
C7orf52	chromosome 7 open reading frame 52	375607	turquoise	-0.189001884	3.06E-12	-0.000433421	0.987353263	-0.525197376	7.08E-96	-0.063787777	0.019532175	-0.011213765	0.681717177	-0.346830539	3.62E-39	0.178156953	5.09E-11	0.280526414	1.18E-25	-0.03155134	0.248427137	-0.010272148	0.707153809	-0.337678139	4.29E-37	0.359448959	3.85E-42	0.911866208	0	0.648780313	6.31E-161	0.165706598	1.04E-09	0.418145217	7.55E-58	-0.166698305	8.28E-10	0.299532041	3.53E-29	0.089346656	0.001059908
PPP6R1	protein phosphatase 6, regulatory subunit 1	22870	turquoise	-0.188757204	3.26E-12	-0.006735859	0.805414697	-0.52562382	4.67E-96	-0.052660333	0.053951847	-0.021615098	0.429179525	-0.365411685	1.36E-43	0.169397251	4.37E-10	0.279576007	1.75E-25	0.01328785	0.626979449	-0.026614819	0.330292166	-0.339886927	1.37E-37	0.319378207	3.74E-33	0.941020763	0	0.630885755	1.20E-149	0.203337501	5.69E-14	0.469699808	1.76E-74	-0.109442213	5.96E-05	0.342420099	3.69E-38	0.117635038	1.58E-05
GOLGA8E	golgin A8 family, member E	390535	turquoise	-0.171877184	2.40E-10	0.022740472	0.405539534	-0.527845154	5.33E-97	-0.12394233	5.36E-06	-0.123862804	5.43E-06	-0.428215579	7.10E-61	0.071692743	0.008656888	0.142465191	1.63E-07	0.004097189	0.880888959	-0.056012761	0.040354695	-0.355277168	3.83E-41	0.279086542	2.13E-25	0.864339183	0	0.545101177	1.44E-104	0.266365176	3.37E-23	0.555077296	3.78E-109	-0.019548195	0.474620199	0.431654729	6.22E-62	0.173150426	1.76E-10
RPA4	replication protein A4, 30kDa	29935	turquoise	-0.216066903	1.28E-15	-0.037318719	0.17216188	-0.533147542	2.80E-99	-0.023344994	0.393168192	-0.013121131	0.631309404	-0.356437068	2.03E-41	0.161822955	2.56E-09	0.29085265	1.55E-27	0.010803088	0.692768781	-0.027304156	0.317915989	-0.344196373	1.45E-38	0.324404164	3.29E-34	0.919136281	0	0.620632033	1.64E-143	0.185522107	7.68E-12	0.452249729	1.58E-68	-0.120723061	9.37E-06	0.33448831	2.18E-36	0.121490421	8.21E-06
OAS1	2',5'-oligoadenylate synthetase 1, 40/46kDa	4938	turquoise	-0.20543555	3.09E-14	-0.030747081	0.260697735	-0.541336122	7.04E-103	-0.06675435	0.014523154	-0.026313414	0.335800085	-0.347820679	2.14E-39	0.207327715	1.78E-14	0.295890945	1.75E-28	0.034849573	0.202344444	-0.030044285	0.271757982	-0.341165914	7.08E-38	0.33365552	3.32E-36	0.929640374	0	0.62412233	1.42E-145	0.222952821	1.48E-16	0.497183726	1.39E-84	-0.08511632	0.001817607	0.371312717	4.61E-45	0.132096193	1.22E-06
CD226	CD226 molecule	10666	turquoise	-0.198146342	2.49E-13	-0.025175744	0.357118592	-0.543452785	7.96E-104	-0.058528982	0.032165351	-0.020047958	0.463397077	-0.355408102	3.57E-41	0.192573621	1.17E-12	0.28704797	7.82E-27	0.002705365	0.921185605	-0.026558099	0.33132418	-0.352461777	1.77E-40	0.345038588	9.34E-39	0.93279712	0	0.641825777	1.88E-156	0.205831651	2.76E-14	0.473072022	1.14E-75	-0.11597618	2.08E-05	0.353047055	1.29E-40	0.116021377	2.07E-05
FAM193B	family with sequence similarity 193, member B	54540	turquoise	-0.148593193	4.64E-08	0.041304533	0.13073036	-0.545919541	6.15E-105	-0.105238779	0.00011362	-0.1148227	2.52E-05	-0.343741523	1.85E-38	0.165512099	1.09E-09	0.207677203	1.60E-14	0.032257302	0.237993765	0.108753597	6.63E-05	-0.268610141	1.40E-23	0.309199351	4.46E-31	0.840730765	0	0.621156241	8.08E-144	0.092280145	0.000719408	0.36972755	1.15E-44	-0.205933078	2.68E-14	0.318601705	5.42E-33	0.195716001	4.91E-13
C4orf10	chromosome 4 open reading frame 10	317648	turquoise	-0.204337921	4.26E-14	-0.052001416	0.057030689	-0.548767097	3.11E-106	-0.118751985	1.31E-05	-0.006927287	0.80000028	-0.266094163	3.74E-23	0.237754906	1.12E-18	0.281938373	6.61E-26	0.083426218	0.00224027	0.065949739	0.015755405	-0.295553612	2.03E-28	0.359507885	3.72E-42	0.901788619	0	0.624053115	1.56E-145	0.132432606	1.15E-06	0.426448954	2.45E-60	-0.150633577	3.01E-08	0.355301011	3.78E-41	0.197523954	2.97E-13
CCDC66	coiled-coil domain containing 66	285331	turquoise	-0.155237273	1.12E-08	0.001262386	0.963176512	-0.554566547	6.55E-109	-0.148706009	4.53E-08	-0.082411596	0.002535427	-0.322844281	7.03E-34	0.167171987	7.41E-10	0.215400601	1.57E-15	0.084285587	0.002015249	0.082553903	0.002491991	-0.28892848	3.53E-27	0.313966244	4.86E-32	0.899448864	0	0.6036143	8.13E-134	0.143888299	1.22E-07	0.466529233	2.26E-73	-0.080705325	0.003112871	0.430009644	2.00E-61	0.212530679	3.76E-15
ZNF423	zinc finger protein 423	23090	turquoise	0.073469763	0.007133183	0.046436168	0.08928657	-0.580840999	1.00E-121	-0.434560159	7.77E-63	-0.062865676	0.021369564	-0.238185145	9.71E-19	0.312969677	7.75E-32	0.32951247	2.65E-35	-0.028158737	0.303000003	0.115630906	2.20E-05	-0.295778823	1.84E-28	0.437632624	8.43E-64	0.701687381	3.21E-199	0.651786674	6.76E-163	0.118003518	1.49E-05	0.394693132	3.46E-51	-0.211081774	5.82E-15	0.32027652	2.43E-33	0.148935513	4.32E-08
SCLY	selenocysteine lyase	51540	tan	0.471713223	3.45E-75	-0.032480376	0.234762153	0.234196144	3.75E-18	-0.312146534	1.14E-31	0.283871438	2.96E-26	0.593064739	4.28E-128	0.305457521	2.47E-30	0.050338473	0.065454832	0.152547225	2.00E-08	0.494675124	1.27E-83	0.44222115	2.93E-65	0.026276079	0.33648645	-0.224362399	9.45E-17	-0.149732899	3.65E-08	-0.130329511	1.69E-06	-0.260407385	3.28E-22	0.041638402	0.127645152	-0.039598197	0.147408119	0.031488614	0.249369384
PPP2R5C	protein phosphatase 2, regulatory subunit B', gamma	5527	tan	-0.099724311	0.000255962	0.170492532	3.36E-10	0.226389985	4.92E-17	0.406724828	1.54E-54	-0.052547254	0.054470144	-0.101360754	0.000201981	-0.278891593	2.31E-25	-0.16235038	2.27E-09	-0.126943152	3.14E-06	-0.559205831	4.33E-111	-0.381696216	1.01E-47	-0.013106742	0.631683701	-0.054783073	0.044960479	0.012336742	0.651849277	0.071192055	0.009135714	0.001662088	0.951529898	0.312604813	9.19E-32	0.062749748	0.021610883	-0.188800498	3.23E-12
CDC42SE1	CDC42 small effector 1	56882	tan	0.304725735	3.44E-30	-0.069226386	0.011251855	0.219670161	4.18E-16	-0.39064395	4.32E-50	0.178740079	4.40E-11	0.61367559	1.78E-139	0.38790301	2.34E-49	0.081193068	0.002936653	0.214377632	2.15E-15	0.503391545	5.38E-87	0.54671267	2.69E-105	-0.146297941	7.48E-08	-0.282794021	4.64E-26	-0.255911631	1.76E-21	-0.148112584	5.13E-08	-0.25704977	1.16E-21	0.053374332	0.050773349	-0.076984987	0.004807327	0.063907306	0.019304396
PLCXD1	phosphatidylinositol-specific phospholipase C, X domain containing 1	55344	tan	0.236288646	1.85E-18	0.145903884	8.11E-08	0.205996655	2.63E-14	-2.38E-05	0.999305673	0.05403438	0.047975885	0.271979742	3.73E-24	0.116695063	1.85E-05	-0.148873285	4.37E-08	0.233393995	4.91E-18	0.509048225	3.08E-89	0.506638886	2.81E-88	-0.161602227	2.69E-09	-0.116551394	1.89E-05	-0.116846997	1.80E-05	-0.096978747	0.000377872	-0.18888065	3.16E-12	-0.046843021	0.086514623	-0.089619618	0.001022849	0.073263229	0.007296984
CRYGS	crystallin, gamma S	1427	tan	0.212718457	3.55E-15	0.113612765	3.07E-05	0.204497783	4.07E-14	-0.116209635	2.00E-05	0.098105756	0.000322419	0.260271285	3.46E-22	0.042558069	0.119438973	-0.105680313	0.000106283	0.306345128	1.65E-30	0.511798451	2.41E-90	0.528047345	4.37E-97	-0.063427197	0.020233578	-0.138619071	3.50E-07	-0.119392	1.18E-05	-0.12489172	4.53E-06	-0.216215693	1.22E-15	-0.051656682	0.058698799	-0.077984359	0.004284979	0.270324447	7.17E-24
PAG1	phosphoprotein associated with glycosphingolipid microdomains 1	55824	tan	0.402574234	2.29E-53	-0.053842666	0.048774764	0.202916309	6.42E-14	-0.227028716	4.00E-17	0.193534474	8.96E-13	0.590000225	1.80E-126	0.287820042	5.64E-27	0.142229237	1.71E-07	0.238134188	9.88E-19	0.600748387	3.06E-132	0.50347268	5.00E-87	-0.037337818	0.171942312	-0.287171306	7.43E-27	-0.201517692	9.59E-14	-0.211275284	5.49E-15	-0.315132215	2.81E-32	-0.044196744	0.105846586	-0.0629569	0.021181323	0.079221388	0.003709848
AP2B1	adaptor-related protein complex 2, beta 1 subunit	163	tan	-0.087362052	0.001368976	0.205409478	3.12E-14	0.19086971	1.85E-12	0.234091266	3.89E-18	-0.101133957	0.000208765	-0.173000831	1.83E-10	-0.275353021	9.69E-25	-0.31912533	4.22E-33	-0.031609506	0.247555603	-0.508274191	6.28E-89	-0.321854204	1.14E-33	-0.000957995	0.972051316	0.019916167	0.46634227	-0.004008903	0.88343703	0.17586468	9.03E-11	0.169511057	4.25E-10	0.412316329	3.83E-56	0.19727681	3.18E-13	-0.068271162	0.012429167
STK11IP	serine/threonine kinase 11 interacting protein	114790	tan	0.07414787	0.006618312	-0.042354953	0.121214893	0.187334665	4.76E-12	0.192925889	1.06E-12	0.128961301	2.18E-06	0.260905475	2.72E-22	-0.067374468	0.013632187	-0.030877216	0.258684363	0.241094593	3.57E-19	0.62884721	2.08E-148	0.517841914	8.28E-93	-0.047108946	0.084740645	-0.195223325	5.63E-13	-0.126582193	3.35E-06	-0.119807561	1.10E-05	-0.288598522	4.06E-27	-0.136575247	5.21E-07	-0.145821013	8.25E-08	0.16628058	9.13E-10
PDIA2	protein disulfide isomerase family A, member 2	64714	tan	0.270281	7.29E-24	0.119831017	1.09E-05	0.187183481	4.96E-12	-0.346917264	3.46E-39	0.100369863	0.000233227	0.360978508	1.64E-42	0.289800248	2.43E-27	-0.216434877	1.14E-15	0.260271922	3.46E-22	0.510160719	1.10E-89	0.559142009	4.64E-111	-0.057795099	0.034392296	-0.080439055	0.003213086	-0.102240516	0.000177575	-0.064240739	0.018681207	-0.114407073	2.69E-05	0.028300712	0.300567732	-0.000274666	0.991985359	0.133195899	9.93E-07
LOC100272217	hypothetical LOC100272217	100272217	tan	0.165960425	9.84E-10	-0.130086284	1.77E-06	0.171110646	2.89E-10	-0.178154005	5.10E-11	0.245764837	6.95E-20	0.512878507	8.83E-91	0.262746549	1.35E-22	0.113347914	3.20E-05	0.188749638	3.27E-12	0.410711419	1.11E-55	0.355633312	3.15E-41	0.011294546	0.679551213	-0.203247581	5.84E-14	-0.124288396	5.04E-06	-0.19069052	1.94E-12	-0.248815888	2.34E-20	-0.052483121	0.054765939	-0.086137297	0.001599119	0.122248105	7.20E-06
SLC39A13	solute carrier family 39 (zinc transporter), member 13	91252	tan	0.579416799	5.32E-121	0.107444871	8.12E-05	0.165803056	1.02E-09	-0.270321202	7.18E-24	0.09318459	0.000636963	0.377344759	1.35E-46	0.19408008	7.72E-13	0.177000752	6.81E-11	0.111291571	4.45E-05	0.624340471	1.05E-145	0.494220373	1.89E-83	-0.216762894	1.03E-15	-0.166400234	8.88E-10	-0.134609165	7.60E-07	-0.167408533	7.00E-10	-0.268458109	1.49E-23	-0.10745939	8.10E-05	-0.168789046	5.05E-10	-0.029721153	0.276949463
LOC729227	similar to hCG1984118	729227	tan	0.127328488	2.93E-06	0.022734406	0.405664853	0.155826081	9.81E-09	-0.028456662	0.297911038	0.023863758	0.382736091	0.248131296	2.99E-20	0.073038447	0.00747908	-0.080384766	0.003233876	0.262507749	1.48E-22	0.504709073	1.63E-87	0.540197275	2.26E-102	-0.063832374	0.019446917	-0.270502182	6.68E-24	-0.142809355	1.52E-07	-0.041948288	0.124832469	-0.223466245	1.26E-16	-0.046134797	0.09138557	-0.041151678	0.132161998	0.165841562	1.01E-09
NR2C2AP	nuclear receptor 2C2-associated protein	126382	tan	-0.082223684	0.002593842	-0.000285684	0.991663867	0.151688352	2.41E-08	0.139869373	2.74E-07	0.180824646	2.59E-11	0.192091585	1.33E-12	0.020527887	0.45275986	-0.014116938	0.605639136	0.244846164	9.61E-20	0.419486093	3.03E-58	0.377476894	1.25E-46	0.006793808	0.803774664	-0.063202928	0.020680815	-0.073763227	0.006906108	-0.11012082	5.35E-05	-0.147437536	5.90E-08	-0.184765326	9.36E-12	-0.224035374	1.05E-16	0.233433598	4.84E-18
CBS	cystathionine-beta-synthase	875	tan	0.278942395	2.26E-25	-0.02291219	0.40200198	0.148874245	4.37E-08	-0.235760059	2.22E-18	0.217771688	7.55E-16	0.311131651	1.82E-31	0.198027633	2.58E-13	0.336680753	7.14E-37	0.149191286	4.09E-08	0.384529763	1.83E-48	0.365660387	1.18E-43	-0.048503475	0.075913342	-0.068365592	0.012308114	-0.105544428	0.000108492	-0.150929816	2.83E-08	-0.215719838	1.42E-15	-0.061830862	0.023608902	-0.12198974	7.53E-06	0.036653964	0.179935444
SNHG1	small nucleolar RNA host gene 1 (non-protein coding)	23642	tan	0.45822828	1.58E-70	-0.059940713	0.028227095	0.136667565	5.12E-07	-0.411114582	8.53E-56	0.335817116	1.11E-36	0.650881255	2.66E-162	0.443655168	1.02E-65	0.129712082	1.90E-06	0.151641763	2.43E-08	0.66745152	1.54E-173	0.548067496	6.50E-106	0.138424472	3.64E-07	-0.24704554	4.41E-20	-0.089379142	0.001055433	-0.228047694	2.87E-17	-0.330103336	1.98E-35	-0.1289308	2.19E-06	-0.103314163	0.00015154	0.053238541	0.051365482
ARHGEF10L	Rho guanine nucleotide exchange factor (GEF) 10-like	55160	tan	0.510593614	7.39E-90	0.04143124	0.129552754	0.135854166	5.99E-07	-0.277853156	3.53E-25	0.13517534	6.82E-07	0.338404642	2.95E-37	0.09265115	0.000684458	0.212525576	3.77E-15	0.153854215	1.51E-08	0.542095164	3.23E-103	0.361163887	1.48E-42	-0.106683573	9.12E-05	-0.133104627	1.01E-06	-0.106977599	8.72E-05	-0.171807422	2.44E-10	-0.228178031	2.75E-17	-0.015328358	0.575057075	-0.027069271	0.322098513	0.093624942	0.000600083
MTMR14	myotubularin related protein 14	64419	tan	0.415135334	5.79E-57	0.191625007	1.51E-12	0.135390613	6.54E-07	-0.169441228	4.32E-10	0.017378286	0.525034549	0.160080467	3.80E-09	0.07865201	0.003965249	-0.012386025	0.650550742	0.22238379	1.78E-16	0.480614358	2.21E-78	0.355306769	3.77E-41	-0.141656676	1.92E-07	-0.030531954	0.26404975	-0.044072862	0.10682935	-0.079046419	0.003786695	-0.132952458	1.04E-06	-0.157990267	6.08E-09	-0.213405459	2.89E-15	0.174282411	1.34E-10
DOK7	docking protein 7	285489	tan	0.416738425	1.96E-57	0.01117748	0.682690945	0.133639761	9.13E-07	-0.242607923	2.11E-19	0.16071252	3.30E-09	0.257037211	1.16E-21	0.158176912	5.83E-09	0.201360125	1.00E-13	0.173314639	1.69E-10	0.364384827	2.42E-43	0.306761721	1.36E-30	-0.014824982	0.587676055	-0.120140225	1.03E-05	-0.091142216	0.000837201	-0.110192928	5.29E-05	-0.121539534	8.14E-06	0.001550246	0.954787854	-0.054886171	0.044558026	0.062163115	0.022868701
CHTF18	CTF18, chromosome transmission fidelity factor 18 homolog (S. cerevisiae)	63922	tan	-0.162075478	2.42E-09	-0.093908318	0.00057741	0.132413859	1.15E-06	0.278590528	2.61E-25	0.170200924	3.60E-10	0.165608025	1.07E-09	-0.032905882	0.228684329	-0.061393707	0.024614376	0.268207098	1.64E-23	0.54400759	4.48E-104	0.502646005	1.05E-86	0.027646224	0.311888761	-0.059790573	0.028625202	-0.037825547	0.166405794	-0.036228156	0.185049892	-0.155889765	9.68E-09	-0.137889055	4.04E-07	-0.087517574	0.001342043	0.1757447	9.31E-11
DPY19L1P1	dpy-19-like 1 pseudogene 1 (C. elegans)	100129460	tan	0.401409556	4.84E-53	0.144263375	1.13E-07	0.120343371	1.00E-05	-0.29981371	3.11E-29	-0.059603264	0.029128627	0.384430597	1.94E-48	0.066696144	0.014609359	-0.072152131	0.008237402	0.025909762	0.343268468	0.300189487	2.63E-29	0.118904373	1.28E-05	-0.057551024	0.035161521	-0.250834371	1.13E-20	-0.13815366	3.84E-07	-0.210790127	6.35E-15	-0.200261946	1.37E-13	0.160184642	3.72E-09	0.177294278	6.33E-11	0.044642697	0.102368016
KLHL21	kelch-like 21 (Drosophila)	9903	tan	0.224316734	9.59E-17	-0.046507202	0.088797518	0.117498996	1.62E-05	-0.11806012	1.47E-05	0.158435878	5.50E-09	0.402316987	2.70E-53	0.323091828	6.23E-34	0.186458501	6.00E-12	0.174682703	1.21E-10	0.444538925	5.27E-66	0.376620847	2.07E-46	-0.120318685	1.00E-05	-0.129810222	1.86E-06	-0.104007133	0.000136691	-0.029974636	0.272871299	-0.152428681	2.05E-08	-0.091859981	0.000760984	-0.200849166	1.16E-13	0.087644776	0.001320379
C17orf56	chromosome 17 open reading frame 56	146705	tan	0.320279114	2.43E-33	0.083177323	0.002309609	0.107450851	8.11E-05	-0.215554895	1.50E-15	0.121063311	8.84E-06	0.407875702	7.25E-55	0.309684084	3.57E-31	0.017211339	0.529023656	0.240785619	3.97E-19	0.748404449	7.28E-241	0.561373987	4.04E-112	-0.01435889	0.599473203	-0.099698818	0.000256901	-0.007265014	0.790471425	-0.096581605	0.00039945	-0.200227715	1.39E-13	-0.210071536	7.88E-15	-0.156789924	7.94E-09	0.143371434	1.36E-07
ZBTB34	zinc finger and BTB domain containing 34	403341	tan	0.323339757	5.53E-34	-0.046729173	0.087283196	0.105892008	0.000102926	-0.260783332	2.85E-22	0.061130594	0.025237243	0.500361639	8.21E-86	0.272767459	2.73E-24	0.135623233	6.26E-07	0.210619313	6.69E-15	0.541535491	5.74E-103	0.476098645	9.46E-77	-0.128495605	2.37E-06	-0.310114807	2.92E-31	-0.209420863	9.56E-15	-0.308443838	6.31E-31	-0.311467902	1.56E-31	-0.066749918	0.014529702	-0.105373535	0.000111332	0.141330533	2.05E-07
IFFO2	intermediate filament family orphan 2	126917	tan	0.575615891	4.40E-119	0.459320567	6.74E-71	0.104007164	0.00013669	-0.272155927	3.48E-24	-0.327794031	6.22E-35	0.144269992	1.13E-07	-0.063341621	0.02040323	-0.162300782	2.30E-09	0.066401542	0.015052622	0.542931844	1.36E-103	0.197693182	2.83E-13	-0.347339591	2.76E-39	-0.071991679	0.008381806	-0.044873898	0.100600672	-0.106369147	9.57E-05	-0.136237066	5.56E-07	0.023913146	0.381751838	0.081200394	0.002934077	0.099116238	0.000279261
ZNF143	zinc finger protein 143	7702	tan	0.248822116	2.34E-20	0.01422787	0.602808606	0.103126584	0.000155813	-0.294320897	3.47E-28	0.108594279	6.80E-05	0.476789963	5.34E-77	0.1665059	8.66E-10	0.000398331	0.988377061	0.070805506	0.009521394	0.285534944	1.48E-26	0.131688236	1.32E-06	0.048347177	0.076863799	-0.118761593	1.31E-05	-0.057482781	0.035379199	-0.202309168	7.65E-14	-0.150286078	3.25E-08	0.185746894	7.24E-12	0.199391743	1.76E-13	0.060646815	0.026418106
KIAA0240	KIAA0240	23506	tan	0.402821272	1.95E-53	0.317391437	9.65E-33	0.099650224	0.0002587	-0.212253004	4.09E-15	-0.156017163	9.41E-09	0.335161183	1.55E-36	0.066610677	0.014736755	-0.12344472	5.84E-06	0.043522337	0.11128433	0.552431393	6.43E-108	0.24848852	2.63E-20	-0.024347869	0.373155295	-0.234439469	3.46E-18	0.019338865	0.479365032	-0.358158105	7.86E-42	-0.38490142	1.46E-48	-0.267422338	2.23E-23	-0.200039884	1.46E-13	0.146595273	7.03E-08
TRIM67	tripartite motif-containing 67	440730	tan	0.429013513	4.04E-61	0.211221507	5.58E-15	0.095841897	0.000442735	-0.197880299	2.69E-13	-0.106561077	9.30E-05	0.117397572	1.64E-05	-0.021925476	0.422580968	0.022057152	0.4197996	0.111292242	4.45E-05	0.288600923	4.05E-27	0.12087661	9.12E-06	-0.237414524	1.26E-18	0.020495269	0.453478411	-0.070575751	0.009757443	-0.03877339	0.156030844	-0.012935478	0.636146017	0.17055453	3.31E-10	0.12790795	2.64E-06	0.060061896	0.027909257
SLC15A4	solute carrier family 15, member 4	121260	tan	0.318736131	5.08E-33	0.009900443	0.71728748	0.094879402	0.000505617	-0.328416312	4.57E-35	0.223177281	1.38E-16	0.53055727	3.68E-98	0.345961915	5.74E-39	0.113536381	3.10E-05	0.166777736	8.13E-10	0.57180954	3.45E-117	0.402066618	3.17E-53	0.206878741	2.03E-14	-0.182595533	1.64E-11	0.036363212	0.183416207	-0.294060152	3.89E-28	-0.352723947	1.54E-40	-0.254802372	2.66E-21	-0.167698681	6.54E-10	0.184148927	1.10E-11
ZNF506	zinc finger protein 506	440515	tan	0.074424155	0.006418288	-0.067469287	0.013500291	0.09025246	0.000941492	-0.099929672	0.000248514	0.173526811	1.61E-10	0.251310492	9.52E-21	0.194119311	7.63E-13	-0.036528192	0.181435067	0.250163213	1.44E-20	0.414725514	7.63E-57	0.383907661	2.67E-48	0.084055567	0.002073355	-0.102892433	0.000161307	-0.056987022	0.036995304	-0.050862208	0.062697625	-0.071110367	0.009216038	-0.262630476	1.41E-22	-0.201479518	9.70E-14	0.205711855	2.85E-14
LOC100133150	hypothetical LOC100133150	100133150	tan	0.347865042	2.09E-39	0.131184525	1.45E-06	0.088533908	0.001177724	-0.198929914	2.00E-13	-0.072760904	0.00770953	0.277034761	4.91E-25	0.192727831	1.12E-12	0.028710669	0.293617558	0.184001009	1.14E-11	0.468604177	4.27E-74	0.357279997	1.28E-41	-0.267546335	2.13E-23	-0.095571608	0.000459615	-0.134103873	8.36E-07	-0.047193193	0.084184811	-0.088534274	0.001177668	0.073041317	0.00747673	0.041687573	0.127195594	0.090969347	0.000856585
KIAA2013	KIAA2013	90231	tan	0.127336764	2.93E-06	0.100247237	0.000237394	0.085066631	0.001828909	-0.216802792	1.02E-15	0.125781982	3.87E-06	0.214357437	2.16E-15	0.236785034	1.57E-18	-0.007402151	0.786610966	0.243828498	1.38E-19	0.580463826	1.56E-121	0.551915921	1.11E-107	0.064987478	0.017348963	-0.025355716	0.353690606	0.09800639	0.000326984	-0.071529954	0.008810052	-0.176404089	7.90E-11	-0.260156726	3.61E-22	-0.17090845	3.04E-10	0.188091055	3.90E-12
LOC100129361	similar to mCG115122	100129361	tan	-0.045868832	0.093270718	0.197451643	3.03E-13	0.084154503	0.002048177	0.291563111	1.14E-27	-0.09209409	0.000737551	-0.193403075	9.29E-13	-0.164561138	1.36E-09	-0.147147282	6.27E-08	-0.098091896	0.000323052	-0.472504045	1.81E-75	-0.403320293	1.41E-53	6.02E-05	0.998243364	0.105670686	0.000106438	0.162887953	2.01E-09	0.129831766	1.86E-06	0.117179899	1.71E-05	0.26973135	9.05E-24	0.134731832	7.42E-07	-0.139481757	2.96E-07
TRIM52	tripartite motif-containing 52	84851	tan	0.376550914	2.16E-46	0.22854165	2.44E-17	0.081711556	0.002759338	-0.191584469	1.52E-12	-0.099639005	0.000259117	0.214021677	2.39E-15	0.045250676	0.097772656	-0.132819283	1.07E-06	0.12691045	3.16E-06	0.5428957	1.41E-103	0.357245077	1.30E-41	0.01646143	0.547130391	-0.174284022	1.34E-10	0.037689152	0.167940439	-0.209745813	8.68E-15	-0.280719649	1.09E-25	-0.170127436	3.67E-10	-0.043830953	0.108769234	0.120708057	9.39E-06
VARS2	valyl-tRNA synthetase 2, mitochondrial (putative)	57176	tan	-0.041605321	0.1279483	-0.11742014	1.64E-05	0.078799418	0.00389764	0.201152364	1.06E-13	0.213688614	2.65E-15	0.156223719	8.99E-09	0.048344643	0.076879293	0.190530391	2.03E-12	0.200002144	1.48E-13	0.615034913	2.95E-140	0.56131874	4.29E-112	0.004086945	0.881184555	-0.067369266	0.013639454	-0.008762018	0.748627733	-0.075993007	0.005382064	-0.224175672	1.00E-16	-0.253972506	3.61E-21	-0.234200403	3.75E-18	0.073301556	0.007266334
HAUS8	HAUS augmin-like complex, subunit 8	93323	tan	0.178612288	4.54E-11	-0.137554684	4.31E-07	0.078404824	0.00408101	-0.161746769	2.61E-09	0.16640535	8.87E-10	0.433719675	1.42E-62	0.230249791	1.39E-17	0.163701368	1.66E-09	0.174337072	1.32E-10	0.545782611	7.09E-105	0.459651808	5.21E-71	-0.018173707	0.506241796	-0.217142873	9.18E-16	-0.130335975	1.69E-06	-0.148800952	4.44E-08	-0.219745819	4.08E-16	-0.036404595	0.182917764	-0.038493557	0.15904152	0.12967726	1.91E-06
PDDC1	Parkinson disease 7 domain containing 1	347862	tan	0.130948724	1.51E-06	0.095833517	0.00044325	0.074202184	0.006578553	-0.027673125	0.311417965	0.145379264	9.03E-08	0.078079835	0.00423787	0.043719364	0.109673407	0.235658563	2.29E-18	0.140250795	2.54E-07	0.488513261	2.69E-81	0.330572614	1.56E-35	-0.064654536	0.017932316	0.12819025	2.51E-06	0.092235582	0.000723715	0.05212941	0.056421458	-0.082529553	0.002499375	-0.17268909	1.97E-10	-0.120568573	9.62E-06	0.088961475	0.001114315
SEC31B	SEC31 homolog B (S. cerevisiae)	25956	tan	0.1641643	1.50E-09	0.038845786	0.155259025	0.073865344	0.006828628	0.055107029	0.043706099	-0.017784093	0.51540249	0.328504708	4.38E-35	0.031628928	0.247265082	0.002280013	0.9335459	0.145021859	9.72E-08	0.741660658	2.68E-234	0.431122216	9.08E-62	-0.127232701	2.98E-06	-0.143426894	1.34E-07	-0.063221596	0.020643262	-0.241667197	2.92E-19	-0.32268824	7.58E-34	-0.128814552	2.24E-06	0.038215172	0.162079984	0.127542019	2.82E-06
PAXIP1	PAX interacting (with transcription-activation domain) protein 1	22976	tan	0.174188435	1.37E-10	-0.00776652	0.776379508	0.073589645	0.007039625	-0.058381229	0.032603502	0.041606823	0.127934529	0.3230584	6.33E-34	0.119850413	1.09E-05	0.031444845	0.250028337	0.216684171	1.06E-15	0.614542882	5.66E-140	0.498737428	3.50E-85	0.030198316	0.269306864	-0.186470762	5.98E-12	-0.061720239	0.023859915	-0.147585303	5.72E-08	-0.208878807	1.12E-14	-0.112995764	3.39E-05	-0.024498322	0.370208216	0.146272049	7.52E-08
PIGC	phosphatidylinositol glycan anchor biosynthesis, class C	5279	tan	0.31147281	1.56E-31	-0.068370071	0.012302398	0.071248469	0.009080608	-0.203072643	6.14E-14	0.178994943	4.12E-11	0.503691037	4.10E-87	0.25113783	1.01E-20	0.119508444	1.15E-05	0.085294913	0.001777513	0.512083398	1.85E-90	0.309749449	3.46E-31	0.133471738	9.43E-07	-0.245674093	7.18E-20	-0.013901065	0.6111643	-0.307452926	9.94E-31	-0.381505287	1.13E-47	-0.150951775	2.82E-08	-0.095382308	0.000471791	0.094808313	0.000510576
ESCO1	establishment of cohesion 1 homolog 1 (S. cerevisiae)	114799	tan	0.264547354	6.79E-23	-0.045010458	0.099568253	0.069655973	0.010755432	-0.273659846	1.91E-24	0.059294387	0.029975413	0.513981932	3.15E-91	0.25741668	1.01E-21	0.135456721	6.46E-07	0.038499693	0.158975037	0.456197809	7.63E-70	0.242366694	2.29E-19	-0.05715004	0.036457097	-0.228340684	2.61E-17	-0.095567885	0.000459851	-0.353887167	8.18E-41	-0.332156136	7.07E-36	-0.136675124	5.11E-07	-0.079787137	0.003470961	0.048465073	0.076145976
GAA	glucosidase, alpha; acid	2548	tan	0.266348553	3.39E-23	0.068901183	0.011641063	0.068318599	0.012368226	-0.12325012	6.05E-06	0.0706862	0.009643326	0.269982548	8.20E-24	0.230404381	1.33E-17	0.208937347	1.10E-14	0.042617202	0.1189258	0.487149537	8.69E-81	0.341460239	6.08E-38	-0.160347611	3.58E-09	-0.050098035	0.066753661	0.027524109	0.314031714	-0.079614362	0.003542388	-0.185794832	7.15E-12	-0.134074111	8.41E-07	-0.213594826	2.72E-15	-0.052973969	0.052535771
[truncated: 15,475 more rows]
