# Supplementary material
Source: publisher figshare collection journal article supplement (https://plos.figshare.com/articles/dataset/_/127846)
Supplement: Supplementary file 1 [file 1 › Table_S2.xlsx]

## Sheet: Table S2
	Table S2. Eigengene levels across the different samples
Individual	Region Name	MEgrey60	MElightgreen	MEred	MEsalmon	MEyellow	MEgreenyellow	MEblue	MEmagenta	MEcyan	MEtan	MElightyellow	MEblack	MEturquoise	MEgreen	MEmidnightblue	MElightcyan	MEbrown	MEpink	MEpurple
H0351.2002	Short Insular Gyri, Right	-0.00088384	0.00493843	0.0137131	0.0194454	0.00696532	0.00237724	-0.0138769	0.0142536	0.0301247	0.00250487	0.00487501	-0.0140041	0.00222652	-0.00790161	0.0147354	0.02628	0.0311955	0.0208367	0.0209688
H0351.2002	Head of Caudate Nucleus, Right	-0.0503167	-0.0890683	-0.025302	0.0491247	0.0588434	0.0278841	0.037194	0.0543973	0.0236393	0.0224327	0.017009	0.0570007	0.00178648	0.0165686	0.026272	0.0307234	0.0167917	0.0361368	-0.0116052
H0351.2002	Putamen, Right	-0.0516247	-0.105244	-0.0218702	0.0429521	0.0532491	0.0546943	0.0549398	0.0652168	0.0365226	0.0396483	0.0302655	0.0319438	-0.0165655	0.00147562	-0.0344951	-0.0225327	-0.016624	-0.00348477	0.0126563
H0351.2002	inferior frontal gyrus, opercular part, Right	0.023467	0.0198632	0.029991	0.0230812	0.0126776	0.00143581	-0.0209347	-0.00600415	0.0344769	0.00781591	0.0156456	-0.00570219	-0.00730497	-0.00397694	0.00131995	0.00167468	0.0213693	-0.00581144	0.0140045
H0351.2002	posterior orbital gyrus, Right	-0.0452719	-0.0285102	-0.00904523	-0.0116908	0.0379368	0.0406307	0.0579064	0.0421309	0.0313579	0.0231533	0.0249571	0.0323304	0.0140456	0.0302754	-0.027631	-0.0180095	-0.0195835	-0.00176064	0.0308416
H0351.2002	temporal pole, Right, superior aspect	-0.0103308	0.00383857	0.025828	0.0324366	0.0203655	-0.00882239	-0.038512	0.00860389	0.0398484	-0.00309039	0.0156488	-0.00634088	-0.0042514	-0.0111552	0.0218815	0.0219242	0.0310157	0.00448394	0.0297146
H0351.2002	precentral gyrus, Left, inferior lateral aspect of gyrus	0.0243297	0.0180819	0.00491247	-0.00177104	0.010971	0.00220674	0.00427222	0.0064761	0.0245549	0.0131757	0.0111428	0.00532415	0.0149218	0.0215902	0.00764349	0.0135919	0.0183353	0.0240653	0.0122899
H0351.2002	parolfactory gyri, Left	-0.0347396	-0.0202154	0.0035691	0.00626198	0.0221375	0.0121331	0.0225997	0.0228971	0.0338932	0.00294164	0.0196505	0.00849624	-0.00119537	0.00425153	0.0188033	0.0215673	0.0183816	0.0112189	0.0214021
H0351.2002	Short Insular Gyri, Left	0.000350123	0.00983856	0.0142849	0.017453	0.0194346	0.00803608	0.00722915	0.0179282	0.0294409	0.0127274	0.0139366	0.00541613	0.00480413	0.0137775	-0.00249851	0.00140508	0.014535	0.0124498	0.0144598
H0351.2002	temporal pole, Left, superior aspect	0.0134044	0.0185739	0.0218249	0.0281962	0.00326522	0.000555506	-0.0279281	0.00562848	0.031709	0.0177575	0.00972516	-0.0116664	0.00769913	0.000756294	-0.0129449	-0.0149896	-0.00240812	-0.00843317	0.0212063
H0351.2002	temporal pole, Left, inferior aspect	-0.000200817	0.0118873	0.0108392	0.00818467	0.0166002	-0.00695626	0.00551923	0.00537693	0.0254212	-0.0142281	0.00749517	0.0121496	0.0217065	0.015818	-0.0138702	-0.00466587	-0.00412249	0.00118903	0.010354
H0351.2002	temporal pole, Right, inferior aspect	-0.0108526	-0.000434604	0.00524273	0.00594608	0.000893936	0.00445236	0.0247629	0.00516392	0.0405198	0.012008	0.0341967	0.000930687	-0.000734412	0.00334359	-0.0123935	-0.0129396	-0.0228222	-0.0166466	0.0205771
H0351.2002	temporal pole, Right, medial aspect	-0.0123227	0.0128256	0.0154219	0.0340516	0.0129975	-0.00802252	-0.0226838	0.00438813	0.0294351	-0.00651204	0.00324752	-0.00588283	0.017009	0.0142623	0.00973362	0.0172823	0.0255867	0.0154145	0.0193691
H0351.2002	temporal pole, Right, inferior aspect	0.00124246	0.0131992	0.00836679	0.0169648	0.00178174	0.00328166	0.00699226	0.00729071	0.0272415	0.0104817	0.0123864	-0.00149495	0.00438101	0.0144505	0.00732561	0.00161487	0.00652	0.0119768	0.00866079
H0351.2002	precentral gyrus, Left, bank of the precentral sulcus	0.0321989	0.0238434	0.0129655	0.0012079	0.004504	0.00816241	0.0080852	-0.00125249	0.026753	0.00943786	0.00895629	-0.00145839	0.00702863	0.0120507	-0.0146575	-0.0108533	0.000267591	0.000412427	0.0151835
H0351.2002	superior frontal gyrus, Left, lateral bank of gyrus	0.035423	0.0189151	0.0134507	0.000113191	0.00370875	0.0115182	0.0116643	-0.0054376	0.027685	0.0181493	0.0143363	-0.00811887	-0.000494962	0.00907953	2.60887e-05	0.00160939	0.0157667	0.0106162	0.0113907
H0351.2002	middle frontal gyrus, Left, superior bank of gyrus	0.0310415	0.0169864	0.0150734	-0.00391345	0.00398043	0.0234063	0.0239293	-0.00683784	0.033765	0.0123682	0.019721	-0.00577082	0.00500651	0.0105213	-0.0421655	-0.0279663	-0.0164844	-0.0285012	0.0241616
H0351.2002	superior frontal gyrus, Right, lateral bank of gyrus	0.0257191	0.0186706	0.0122739	0.00448302	-0.000295972	-0.00738955	-0.00442943	-0.00488018	0.0282192	0.00196241	0.0127591	-0.00862865	0.000463962	0.00395778	0.0371948	0.0274604	0.0304532	0.0208298	0.00943335
H0351.2002	middle frontal gyrus, Right, superior bank of gyrus	0.0336797	0.0176296	0.0151958	-0.00219543	0.00689076	0.00990366	0.0142525	-0.00635991	0.0328739	0.019115	0.0221985	-0.0116904	-0.00157356	0.00435524	0.00557582	0.00470238	0.0126084	-0.000321811	0.00826489
H0351.2002	middle frontal gyrus, Right, inferior bank of gyrus	0.0434945	0.0172416	0.0174855	-0.00301056	0.00163186	0.00248722	-0.00627168	-0.011738	0.032058	0.00607456	0.0136391	-0.0193687	0.00379894	-0.0107539	0.0227396	0.0333658	0.0440208	0.0338227	0.0220773
H0351.2002	superior frontal gyrus, Right, medial bank of gyrus	0.00486371	0.0102733	0.0161196	0.0172134	0.00777322	0.0151932	0.00664629	0.00962088	0.0298482	0.0156832	0.0151822	0.00401413	-0.00476328	0.00342489	-0.013116	-0.0197406	-0.00249188	-0.0110122	0.015561
H0351.2002	gyrus rectus, Right	0.00131141	0.0104363	-0.000393916	0.00424297	0.00202117	0.004191	0.0138202	0.00471977	0.0279133	0.0103421	0.00525826	0.0101651	0.0231645	0.0141557	-0.00607415	-0.000755855	-0.00278302	0.00515742	0.020367
H0351.2002	medial orbital gyrus, Left	0.0179698	0.0160789	-0.00316945	-0.0104037	0.00547191	0.0173994	0.0271602	0.00311063	0.0282394	0.0328342	0.0182412	0.0224192	0.0141488	0.0281906	-0.0222801	-0.00301031	-0.00627239	0.0154842	0.0175985
H0351.2002	medial orbital gyrus, Right	0.0189814	0.0236381	0.0231711	0.024534	0.0051162	-0.00939745	-0.0332802	0.00647421	0.0338367	0.00841394	0.0137433	-0.0102033	0.0135898	-0.000108766	0.00795567	0.00825526	0.0129793	-0.00376536	0.0233024
H0351.2002	superior rostral gyrus, Left	0.0119452	0.014821	0.00574136	0.00585682	0.00132242	0.012791	0.0103175	0.011001	0.0273956	0.0246395	0.0129343	0.00261566	0.00901755	0.0165328	-0.0302872	-0.021873	-0.00880992	-0.0121664	0.0135965
H0351.2002	superior rostral gyrus, Right	0.00428844	0.00838211	0.0181089	0.0192741	0.00456394	-0.00532625	-0.021375	0.0146036	0.0391272	0.00410547	0.0176354	-0.0168066	-0.00594864	-0.00984016	0.00312432	0.0123565	0.0187855	-0.00407269	0.0294248
H0351.2002	inferior rostral gyrus, Left	0.00878851	-0.0019396	0.0139229	0.00630047	-0.0139643	0.0336197	0.00887906	-0.000699101	0.031463	0.0254607	0.0121523	-0.0445505	0.0118434	-0.016581	0.00186169	-0.00922839	0.0194052	-0.0121284	0.0148503
H0351.2002	middle frontal gyrus, Right, inferior bank of gyrus	0.0257268	0.0151132	0.0201002	0.00687247	0.00755776	0.0124865	0.00263229	0.0055397	0.0353879	0.0213108	0.020748	-0.00440949	-0.00801863	-0.00522756	-0.0166266	-0.0133986	-0.00310142	-0.0196111	0.0243208
H0351.2002	inferior frontal gyrus, orbital part, Right	0.0239749	0.018628	0.024696	0.0210501	-0.0120742	0.00374139	-0.0335819	-0.00457872	0.0305084	0.00178648	-0.000766438	-0.0316301	-0.00344974	-0.0204151	-0.00621188	0.00853114	0.027962	0.0126222	0.0317404
H0351.2002	lateral orbital gyrus, Right	0.00895	0.00554226	0.00895998	0.000732882	0.00536362	0.0281873	0.0266719	0.0165256	0.0350108	0.0297762	0.0263598	0.00139498	-0.00450252	0.00213762	-0.0518408	-0.0352857	-0.0348975	-0.0277855	0.0243015
H0351.2002	superior frontal gyrus, Left, medial bank of gyrus	0.0105304	0.00530107	0.00665523	0.000525405	-0.00624032	0.00298328	0.00946774	-0.00209154	0.0301152	0.00798234	0.0155279	-0.00386555	0.000821931	-0.00129333	-9.4214e-05	0.0187634	0.0218377	0.0103324	0.0269788
H0351.2002	superior frontal gyrus, Left, lateral bank of gyrus	0.0270494	0.0239975	0.0182038	0.00774121	-0.00344288	0.00163616	-0.00450006	-0.00470778	0.0359834	0.0163492	0.0207828	-0.00801254	-0.00366406	0.00120834	-0.0315182	-0.0247664	-0.0279895	-0.0332227	0.0263416
H0351.2002	superior frontal gyrus, Right, lateral bank of gyrus	0.0160791	0.0185344	0.0153669	0.0150387	0.00269137	0.0174757	0.00695778	0.00951165	0.0268035	0.0153239	0.0102712	-0.00177669	-0.00486038	0.0102557	-0.0345383	-0.026992	-0.0267554	-0.0334728	0.0218576
H0351.2002	middle frontal gyrus, Left, superior bank of gyrus	0.0207562	0.0173928	0.0162699	0.0102105	0.0060372	0.0223292	0.0122647	0.0119162	0.0280534	0.0210986	0.0122733	0.000376054	-0.0093795	0.00693096	-0.0364669	-0.0352583	-0.0282815	-0.0395431	0.0134452
H0351.2002	middle frontal gyrus, Right, superior bank of gyrus	0.0138946	0.0164117	0.00389457	0.00631548	-0.00198388	0.00143844	0.00776826	0.00778559	0.028718	0.0043844	0.00608393	0.0100003	0.0139983	0.0172425	-0.0157241	0.00126352	-0.00582112	0.00363395	0.0284741
H0351.2002	superior frontal gyrus, Left, lateral bank of gyrus	0.0333243	0.0254539	0.0208459	0.0146702	-0.00241107	0.00137789	-0.0181256	0.00560348	0.0438735	0.015109	0.0180903	-0.0175133	0.0196594	-0.000375028	-0.0394628	-0.0081423	-0.00798315	-0.0233732	0.0487793
H0351.2002	middle frontal gyrus, Left, superior bank of gyrus	0.00446046	0.0106254	-0.00481548	-0.00469466	-0.00806699	0.000905653	0.0132669	-0.00180482	0.020496	0.00341361	0.0046978	0.0135195	0.00953295	0.0145581	0.0299865	0.0410209	0.0373117	0.0483982	0.00999346
H0351.2002	middle frontal gyrus, Left, inferior bank of gyrus	-0.00744742	-0.00420265	-0.000127832	-0.0151712	0.0165638	0.0258022	0.0427876	0.00197769	0.0310391	0.0177028	0.0259312	0.0292777	0.00270974	0.0163575	0.00894724	0.0168842	0.0125948	0.0149726	0.0074226
H0351.2002	superior frontal gyrus, Right, medial bank of gyrus	0.0130584	0.0114662	0.0131645	0.00315682	-0.0065781	0.0134751	0.00462835	-0.00741068	0.0266442	0.00905954	0.00440227	-0.0147985	0.00257944	-0.0111295	-0.0122661	0.00637685	0.0126267	0.00916196	0.0198077
H0351.2002	frontal pole, Left, inferior aspect	-0.0109997	-0.0223669	-0.00632889	-0.026564	0.0206629	0.0414094	0.0533715	0.00175117	0.0241224	0.0272692	0.0201922	0.0325928	0.0127299	0.00487846	0.0392299	0.0300654	0.0386649	0.0608669	0.00446054
H0351.2002	frontal pole, Left, medial aspect	0.0263881	0.0254322	0.0204908	0.019884	-0.00844764	-0.0151308	-0.0382732	-0.00908699	0.0325676	0.00336028	0.00635487	-0.0224195	0.0330319	-0.00855955	-0.000486	0.00554783	0.00910734	0.00387179	0.0360565
H0351.2002	frontal pole, Right, inferior aspect	0.0161051	0.0237714	0.0163099	0.019549	0.000502556	0.00782417	-0.00783798	0.00261737	0.0319033	0.0172707	0.0100245	-0.00755284	0.00767676	0.00899905	-0.0354776	-0.0230706	-0.0131387	-0.013804	0.0253012
H0351.2002	frontal pole, Right, medial aspect	0.0154014	0.0234821	0.0185003	0.0168041	0.0207629	0.00110954	-0.0146187	0.00597859	0.0203614	-0.0118114	0.00137808	0.0324998	-0.0030273	0.015919	0.0294853	0.0295841	0.0258065	0.00640179	0.00129276
H0351.2002	frontal pole, Left, inferior aspect	-0.000138439	-0.00247739	0.000788858	-0.0142929	0.0204146	0.0464276	0.055768	0.00831996	0.0288919	0.0395619	0.0253857	0.0358437	0.000817743	0.0280507	-0.018162	-0.0246193	-0.0235722	-0.00684416	0.0186533
H0351.2002	superior frontal gyrus, Left, lateral bank of gyrus	0.0243492	0.0207764	0.015053	0.00906605	0.00426304	-0.00195319	-0.00988571	0.00788459	0.0308233	0.0151661	0.0147997	0.000757275	0.00053702	0.00441124	0.0173945	0.0101758	0.0148469	0.00142567	0.0124542
H0351.2002	superior frontal gyrus, Left, medial bank of gyrus	0.00450646	0.0110451	0.00662821	0.00531289	0.0160952	0.0127783	0.0183465	0.0118093	0.0284769	0.0242248	0.0182212	0.0149918	0.00533649	0.017884	0.0100055	0.00574534	0.00647807	0.00401807	0.0185756
H0351.2002	superior frontal gyrus, Right, lateral bank of gyrus	0.00240417	-0.00376933	0.00942468	-0.00144906	0.0202709	0.0386448	0.0388039	0.0186409	0.035008	0.0334234	0.0306826	0.0146448	-0.00495867	0.000626309	-0.0175652	-0.0115885	-0.00280339	-0.00203146	0.0201177
H0351.2002	middle frontal gyrus, Right, superior bank of gyrus	-0.00233972	-0.011826	-0.00160642	-0.0191051	0.0145337	0.0164902	0.0367507	0.00481191	0.0347125	0.010816	0.0267027	0.0204983	0.0107071	-0.0016664	0.0314037	0.0297911	0.0274027	0.0274841	0.00921348
H0351.2002	middle frontal gyrus, Right, inferior bank of gyrus	0.0213202	0.0166485	0.0123964	0.00790338	-0.001028	0.0115988	-0.00431497	0.00531925	0.0241752	0.0164673	0.00675855	-0.00281606	0.00530753	0.00180717	-0.00465472	0.0106696	0.0136208	0.00557012	0.014919
H0351.2002	frontal pole, Right, superior aspect	0.0136922	0.0117092	0.013681	0.00733972	0.00648886	-4.6501e-06	-0.00328889	0.00303027	0.033306	0.0124892	0.0209882	0.00355359	0.00124776	-0.00141855	0.0127568	0.0186558	0.0234854	0.00881724	0.00824483
H0351.2002	frontal pole, Right, superior aspect	0.0155808	0.0116762	0.0155363	0.00678506	-0.000557702	0.00548347	0.00373205	0.00209468	0.0353733	0.0145219	0.0205763	-0.00974266	0.00153619	-0.00559272	-0.0139823	-0.013954	-0.00610992	-0.0161647	0.0221811
H0351.2002	Head of Caudate Nucleus, Left	-0.0566794	-0.0976279	-0.0233254	0.0501332	0.055067	0.0416838	0.0445699	0.0611873	0.0333553	0.0314688	0.0237723	0.0426399	-0.00319367	0.0129187	-0.0266595	-0.0232958	-0.032083	-0.0169993	0.0209517
H0351.2002	Putamen, Left	-0.0616624	-0.0847812	-0.0528394	0.033214	0.0488437	0.000890984	0.049872	0.0516661	0.0171935	0.0173817	0.0146647	0.0762273	0.0452607	0.062018	0.030038	0.0436631	0.000603924	0.0507794	-0.0121966
H0351.2002	superior frontal gyrus, Left, medial bank of gyrus	0.00840715	0.0105437	0.0127143	0.0234814	0.00796542	0.00827403	-0.00311687	0.0325956	0.0297296	0.0143367	0.00924985	-0.0106717	-4.75694e-05	0.00742887	-0.0128271	-0.00662401	0.00413764	0.00470924	0.0258898
H0351.2002	superior frontal gyrus, Right, medial bank of gyrus	0.0349637	0.0300089	0.0146316	0.0100672	-0.00378841	0.0105666	-0.0061313	-0.0103123	0.0124614	-0.00745864	-0.0176026	-0.012284	0.0166244	0.0191383	-0.0148235	0.00815849	0.0130523	0.0129346	0.0122096
H0351.2002	Cingulate gyrus, frontal part, Right, superior bank of gyrus	0.00634731	0.00902282	0.0119684	0.0170169	0.012379	0.00524842	0.00143809	0.0174069	0.0287813	0.00818961	0.00712582	0.0114411	0.00142143	0.00846361	0.00450647	-0.00956991	0.00266354	-0.00631397	0.0218234
H0351.2002	Putamen, Right	-0.0527158	-0.0773776	-0.0465541	0.0515852	0.0427303	-0.00226261	0.0254167	0.0534961	0.00836214	0.0078082	-0.00644259	0.0698224	0.0362283	0.0561255	0.0438956	0.0479822	0.0131626	0.0652969	-0.0053173
H0351.2002	middle temporal gyrus, Right, inferior bank of gyrus	0.00224279	0.0147684	0.00548874	0.0131538	0.00556819	-0.0149967	0.00194319	0.00346669	0.0279364	0.00197203	0.0122643	0.0151209	0.00722161	0.0160627	0.0164575	0.030066	0.0207286	0.0120995	0.00848812
H0351.2002	inferior temporal gyrus, Right, bank of the its	0.0181793	0.0322429	0.0208646	0.0257875	-0.00575893	0.0183734	-0.00765724	-0.00302108	0.0182536	0.0122246	-0.00347509	-0.00989712	-0.000154543	0.0192431	-0.0430892	-0.0409495	-0.0290652	-0.0210148	0.0205965
H0351.2002	inferior temporal gyrus, Right, bank of mts	-0.00877976	0.0121144	0.000293777	0.00649583	0.00951266	0.00321673	0.0177941	0.00695248	0.0129672	-0.00170843	0.00333038	0.0376289	0.0052583	0.0314132	0.020029	0.0197569	0.0134979	0.0173639	-0.0153075
H0351.2002	middle temporal gyrus, Right, superior bank of gyrus	0.00550136	0.0193063	0.00427828	0.0102293	0.00208029	0.0150764	0.0179426	0.00390726	0.0194082	0.0165021	0.00446433	0.0147425	0.00475802	0.028946	-0.0121347	-0.0163422	-0.00730288	0.00115252	0.0171452
H0351.2002	middle frontal gyrus, Left, superior bank of gyrus	0.026578	0.0104941	0.00573569	-0.00845351	0.00904749	0.0223405	0.0256294	-0.00923403	0.0197261	0.00917681	0.00116053	0.0166855	0.0230601	0.0122681	0.0246514	0.0330591	0.0350341	0.0511226	0.00865424
H0351.2002	posterior orbital gyrus, Right	0.0110856	0.0193618	0.0186036	0.0182253	0.00836973	-0.012406	-0.0178202	-0.00978843	0.0283336	-0.00639939	0.00437665	-0.00807891	0.00780684	0.0109121	0.0211033	0.0249026	0.0286248	0.0181268	0.0119032
H0351.2002	inferior frontal gyrus, opercular part, Left	0.0347074	0.0199333	0.0201728	0.00179007	0.00282672	-0.0126074	-0.0146237	-0.0241544	0.0374338	-0.000899671	0.0164893	-0.0175337	0.00723375	-0.00741865	0.0387727	0.0363994	0.0373551	0.0206538	0.01734
H0351.2002	superior frontal gyrus, Left, medial bank of gyrus	0.00512891	0.00577212	0.00906565	0.0108931	0.00725141	0.011413	0.000875072	0.0126075	0.0225469	0.00166115	-0.00628526	-2.48092e-05	0.0151451	0.00349481	0.00332524	0.0168251	0.0142891	0.018199	0.0195658
H0351.2002	superior frontal gyrus, Right, medial bank of gyrus	0.00654582	0.00320197	0.0135412	0.00888694	-0.00320746	-0.0101402	-0.00425782	-0.005795	0.0411313	-0.0097073	0.0122463	-0.0200465	0.0125152	-0.013237	0.0284159	0.0325497	0.0330358	0.0115221	0.0286228
H0351.2002	superior frontal gyrus, Right, lateral bank of gyrus	0.0219752	0.0081738	0.00836892	-0.0159322	0.0166899	0.027088	0.0335737	-0.00573936	0.0222904	0.0169092	0.0172377	0.0180396	0.00735394	0.0132302	0.0240865	0.0170886	0.0228654	0.0230825	-0.0063193
H0351.2002	superior frontal gyrus, Left, lateral bank of gyrus	0.023451	0.0146876	0.0211246	0.00988334	0.00298687	-0.00695534	-0.0248016	0.00804892	0.0328566	-0.00348015	0.0116006	-0.0113595	-0.00337854	-0.0153802	0.028775	0.0265501	0.0361141	0.017216	0.0170765
H0351.2002	medial orbital gyrus, Left	0.0133312	0.0161254	0.0176683	0.0160312	0.0118944	0.00901993	-0.00102214	0.0138431	0.0276545	0.00969756	0.00856721	0.00744486	-0.0022742	0.0028181	-0.0122481	-0.0166044	-0.011263	-0.0143518	0.0231427
H0351.2002	inferior rostral gyrus, Right	-0.00318796	0.00456044	0.0137073	0.00921856	0.0132479	0.00416437	-0.00403728	0.00119079	0.0257592	-0.00292895	0.00986568	0.00864348	-0.00169295	-0.00622629	0.0328205	0.0352778	0.0406171	0.0300258	0.00762751
H0351.2002	inferior frontal gyrus, orbital part, Right	0.0234043	0.012485	0.0115791	-0.000890691	0.0232233	0.0130899	0.0108237	0.0156783	0.0310427	0.0217598	0.0167054	0.0252471	0.0181584	0.00955962	0.0162145	0.00858164	0.0111655	0.00449721	0.0106068
H0351.2002	lateral orbital gyrus, Left	0.0160385	0.0125042	0.0116099	0.00247376	0.00389432	0.0194698	0.012617	-0.00314534	0.0270486	0.00943991	0.00921293	0.000928987	-0.0122109	0.00328876	-0.0046754	0.0162366	0.0233885	0.0175214	0.0162034
H0351.2002	Cingulate gyrus, frontal part, Left, superior bank of gyrus	-0.00368261	0.00821946	0.0225769	0.0262678	0.00126495	0.00908594	-0.0223525	0.0060923	0.0210806	-0.00591053	0.00138298	-0.0116479	0.0059138	-0.00534289	0.00454263	-0.0184811	0.00271212	-0.0151181	-0.0146429
H0351.2002	Cingulate gyrus, frontal part, Right, superior bank of gyrus	-0.0015708	0.00329486	0.0149736	0.0146317	0.0154541	-0.000437502	0.00297029	0.0110637	0.0334585	0.00682448	0.0187641	0.00609494	-0.00246768	-0.00017058	0.0126982	0.0261501	0.0255492	0.00532532	0.0153243
H0351.2002	superior frontal gyrus, Right, lateral bank of gyrus	0.014849	0.0089827	0.0124462	0.00303624	0.0021233	0.0113838	0.0137522	0.00586351	0.0353423	0.0175571	0.0233477	-0.00511069	0.000730639	-0.00239867	-0.00726285	-0.0128686	-0.00381624	-0.000373413	0.0275173
H0351.2002	superior frontal gyrus, Left, lateral bank of gyrus	0.018865	0.0185682	0.0231875	0.0157002	0.0162336	0.00854865	-0.00795676	0.00722478	0.0314938	0.0127108	0.0171937	0.0120598	-0.00814442	0.00131069	0.0134173	-0.00130699	0.00864934	-0.00702827	0.0197462
H0351.2002	middle frontal gyrus, Left, superior bank of gyrus	0.00612317	0.0153331	0.00526978	0.0133313	-0.00112432	0.0283418	0.0204129	0.01885	0.021407	0.0238001	0.0134857	0.0183194	-0.00320418	0.028662	-0.0490236	-0.0289538	-0.015046	-0.00214489	0.01246
H0351.2002	frontal pole, Left, inferior aspect	-0.0246632	-0.0298378	-0.0270279	-0.0271656	0.0153617	0.0388205	0.0544998	0.00960998	0.00130639	0.0151935	-0.00771924	0.0633239	0.015791	0.0325169	0.029426	0.0607809	0.0286337	0.0696702	-0.0180757
H0351.2002	superior temporal gyrus, Left, inferior bank of gyrus	0.00302196	0.0104438	0.0106323	0.0125492	0.0197698	0.0203543	0.0246199	0.0131996	0.0300915	0.0274726	0.0223452	0.0163358	0.00511144	0.0182133	-0.00937981	-0.0147872	-0.0127614	-0.00860879	0.0160375
H0351.2002	middle temporal gyrus, Left, superior bank of gyrus	-0.00550479	0.00024537	0.00678058	0.0147066	0.00738503	0.0132479	0.00783277	0.0168765	0.030261	0.00722308	0.00826542	0.00427769	0.000480581	0.00387655	-0.0106443	-0.0025595	0.0222308	0.0239524	0.0275488
H0351.2002	middle temporal gyrus, Left, inferior bank of gyrus	-0.00570252	0.00627512	0.0105203	0.0237814	0.00574126	0.00954631	0.00636678	0.0167238	0.0295089	0.0166494	0.0182719	0.00285592	0.00314483	0.0108315	-0.0161607	-0.00807347	0.00163916	-0.00745166	0.0162024
H0351.2002	inferior temporal gyrus, Left, bank of mts	-0.0191635	-0.00816553	-0.00236958	0.0125924	-0.0028283	-0.00626956	0.00299216	0.011527	0.0292117	-0.00296921	0.00828814	0.0132347	0.0147432	0.0027441	0.0425757	0.0404657	0.020792	0.0262604	0.0187071
H0351.2002	inferior temporal gyrus, Right, lateral bank of gyrus	-0.00585781	0.0303364	-0.010932	0.0227471	0.0130207	-0.00639823	0.00537519	0.0212182	0.00017348	-0.00177803	-0.0220111	0.0438767	0.142735	0.0692331	-0.021328	0.00481401	-0.00316904	0.00830342	0.0137563
H0351.2002	inferior temporal gyrus, Right, lateral bank of gyrus	-0.0158071	-0.000288757	-0.018474	0.00891542	-0.00823205	-0.02162	-0.000205016	0.0065251	0.0170273	-0.00925015	-0.0100901	0.0130976	0.0513572	0.0239634	0.0602961	0.0620389	0.0193072	0.0458942	0.00233076
H0351.2002	fusiform gyrus, Right, bank of the its	-0.0193434	0.00238955	0.0173324	0.0391702	0.0146565	0.0120017	-0.00660826	0.0245973	0.0241064	0.00316161	-0.000427818	-0.00661529	0.013762	0.0128562	-0.0411628	-0.0231111	0.0035128	0.0125954	0.0166982
H0351.2002	inferior temporal gyrus, Right, bank of mts	-0.0013013	0.0179688	0.0200819	0.0375801	0.00252263	-0.0102579	-0.0244792	0.00853897	0.0307924	-0.00202612	0.00867044	-0.00237759	0.00840811	0.00867641	-0.00453894	0.00110481	0.00101163	-0.0156428	0.0167009
H0351.2002	post central gyrus, Right, inferior lateral aspect of gyrus	0.014065	0.0209559	-0.000347138	0.00988218	-0.00370221	0.0146414	0.0166331	0.00126643	0.0237957	0.0337595	0.0129802	-0.00771545	0.0113906	0.0256902	-0.0144383	-0.000214247	0.0142292	0.0316713	0.0161183
H0351.2002	superior temporal gyrus, Right, inferior bank of gyrus	-0.0024885	0.000786788	0.00973415	0.0194839	0.0121034	0.0272334	0.0208686	0.0195968	0.0305988	0.0331181	0.0185548	0.00432857	-0.000449364	0.0136923	0.00193782	-0.0175335	-0.0207874	-0.0327423	0.0211681
H0351.2002	planum temporale, Right	-0.00158412	0.00830484	0.00509352	0.0138278	0.00560695	0.00948807	0.00758319	0.00103801	0.0250351	0.0149746	0.0116623	0.0137177	0.00756968	0.0151362	0.0130879	0.00256909	0.00990184	0.0103749	0.0117738
H0351.2002	middle temporal gyrus, Right, superior bank of gyrus	-0.00155592	0.0176214	-0.000200268	0.0221149	0.0106263	0.00248706	0.0117382	0.0240075	0.022105	0.0188122	0.00504863	0.0266281	0.0161066	0.0410139	-0.0138562	-0.00680706	-0.0208721	0.000128639	0.0199637
H0351.2002	superior frontal gyrus, Left, lateral bank of gyrus	0.0180751	0.0105032	0.0180995	0.0132315	0.00536171	-0.000828473	-0.00876185	0.000817732	0.0273361	-0.00772771	0.00860319	0.00728968	-0.0150126	-0.00255716	0.0231205	0.025387	0.023527	0.0116665	-0.00521747
H0351.2002	superior frontal gyrus, Right, lateral bank of gyrus	0.00345005	-0.0121762	-0.000448774	-0.0083254	-0.00138211	0.0181335	0.0284622	-0.000887982	0.0277395	0.00165331	0.0138862	0.0154649	0.00318281	-0.00208878	0.0361948	0.0241903	0.0218259	0.0280097	0.00146881
H0351.2002	middle frontal gyrus, Right, superior bank of gyrus	0.0306228	0.0100883	0.0108535	0.00866382	-0.00790757	0.0183538	0.00765825	0.00707666	0.0185854	0.0121044	-0.000308227	-0.0263718	0.00844853	-0.00129979	0.00208267	0.00059754	0.0358779	0.0329062	0.0138995
H0351.2002	superior frontal gyrus, Right, lateral bank of gyrus	-0.000715591	-0.0189882	-0.00671324	-0.0219197	0.0247634	0.0352968	0.063192	0.0141579	0.0310777	0.0275389	0.0326121	0.0469682	0.00137018	0.0258685	0.0117674	0.00666488	0.00282458	0.0119993	0.0119599
H0351.2002	temporal pole, Right, superior aspect	-0.0244895	-0.0122511	-0.0163291	0.0138249	-0.0133591	0.0122494	0.0163769	0.0149923	0.0111568	0.00976438	-0.0174572	-0.020722	0.0392857	0.0212417	-0.0119737	0.0346027	0.0314309	0.0543954	0.00720745
H0351.2002	temporal pole, Left, superior aspect	-0.00957465	0.00946206	0.0240276	0.0387698	0.00745805	0.00319705	-0.0107525	0.0149437	0.0335064	-0.00219924	0.0120195	-0.00882342	-0.00250542	-0.000249967	-0.0254026	-0.0117387	-0.0145781	-0.035423	0.0255891
H0351.2002	gyrus rectus, Left	-0.0174315	0.00443174	0.018302	0.0363565	0.0147325	-7.14992e-05	-0.013146	0.0117097	0.0288451	6.66435e-05	0.007559	0.0127136	0.00254574	0.00933095	0.00404431	0.00571181	0.00378591	-0.00599446	0.0204989
H0351.2002	gyrus rectus, Right	-0.033291	-0.028281	0.00796782	0.0101157	0.0310126	0.0268603	0.0319988	0.0171747	0.0391524	0.0158002	0.0285022	0.0209789	-0.00833798	0.00118709	-0.00781968	-0.00778773	0.00394877	-0.00564296	0.0167911
H0351.2002	medial orbital gyrus, Left	-0.00548652	-0.0249493	0.00657781	-0.000879079	-0.0106912	0.0390115	0.0221467	-0.00173921	0.022725	0.0197353	0.00247654	-0.0509858	-0.00243523	-0.0294144	-0.00730524	0.0180243	0.0407103	0.0417263	0.000525554
H0351.2002	medial orbital gyrus, Right	-0.00441812	0.00915009	0.0226951	0.0327957	0.00791331	0.0133522	-0.00391795	0.0147712	0.0288904	0.00794583	0.00858777	-0.00330446	-0.0064492	2.91284e-05	-0.0180359	-0.02221	0.00367415	-0.0179532	0.0196047
H0351.2002	middle frontal gyrus, Left, inferior bank of gyrus	0.00651181	-0.000182849	-0.0079036	-0.00532679	0.0023565	0.00141942	0.020161	0.00355708	0.0242185	-0.00260994	0.00150511	0.0306742	0.00559607	0.0159616	0.0409859	0.0359771	0.0182319	0.0343833	0.0169481
H0351.2002	frontal operculum, Left	-0.0013388	0.000484066	0.00600614	0.0120528	0.0152222	0.0096361	0.0154822	0.0145764	0.0306036	0.00510189	0.0105893	0.0146857	0.00191019	0.0180583	-0.00813309	0.00931647	0.00840457	0.00822868	0.0188143
H0351.2002	subcollosal gyrus, Left	-0.0247633	0.000530336	0.0141469	0.0265799	0.0283923	0.00835146	0.00757112	0.0198623	0.0340497	0.00863621	0.0196531	0.0196861	0.00389069	0.0219056	-0.0345649	-0.0247633	-0.00909039	-0.0172103	0.0311443
H0351.2002	subcollosal gyrus, Left	-0.027158	-0.0155611	0.0118342	0.0196529	0.0183037	0.0127737	0.00548319	0.012335	0.0342681	0.00692727	0.0139498	-0.00137754	-0.00492081	-0.00315296	-0.017897	-0.000271786	0.0222564	0.0099325	0.0241211
H0351.2002	subcollosal gyrus, Right	-0.0315633	-0.0185324	0.0150986	0.0262916	0.0176475	-0.00217466	-0.0185282	0.010789	0.0360602	-0.0119101	0.00758535	-0.00971364	0.0117204	-0.0102082	0.00795504	0.0170177	0.0280487	0.00686315	0.0212473
H0351.2002	superior frontal gyrus, Left, lateral bank of gyrus	0.0167595	0.0292059	0.00191013	0.0181774	-0.00992566	-0.0208718	-0.0201301	0.00399112	0.01336	-0.0152422	-0.0115292	0.0431775	0.0131282	0.0214747	0.0848017	0.0302636	0.00883658	0.019418	-0.00596881
H0351.2002	middle frontal gyrus, Left, superior bank of gyrus	0.0115764	0.0137376	0.00809984	0.0142868	-0.00783221	0.00295587	-0.00456913	0.0012116	0.0206587	-0.00789049	-0.00469936	0.0056815	-0.00257585	0.00736864	0.0245613	0.0207105	0.0247834	0.0276181	-0.001428
H0351.2002	Cingulate gyrus, frontal part, Left, superior bank of gyrus	-0.0227392	-0.0128616	0.0166031	0.0243349	0.0269247	0.0201678	0.00752001	0.0308232	0.0319005	0.00937773	0.0181035	0.0197551	-0.0120907	0.00568277	-0.0113224	-0.0115035	-0.0098063	-0.0252884	0.0138086
H0351.2002	middle frontal gyrus, Right, superior bank of gyrus	0.0198387	0.00685594	0.0189272	0.00855185	0.00516079	0.0071232	0.00155081	-0.000246301	0.0307317	0.000747366	0.0138907	0.00164661	-0.00657518	-0.00957899	0.0475327	0.0175064	0.0224731	0.00545811	0.0115058
H0351.2002	middle frontal gyrus, Left, inferior bank of gyrus	0.0171422	0.000764382	0.013438	0.00524959	0.0190938	0.00255349	0.00732222	0.0158142	0.0389824	0.0192596	0.0253077	0.0121488	-0.00258958	-0.00738206	0.0226604	0.00947371	0.0100769	-3.80893e-06	0.0235324
H0351.2002	gyrus rectus, Left	-0.0214164	-0.0229155	0.00383697	0.00535385	0.0148531	0.0180065	0.0167546	0.014502	0.0276406	-0.00470471	0.00547834	0.0148376	0.000373044	-0.00771762	0.0210969	0.010318	0.0282879	0.0331621	0.00374751
H0351.2002	gyrus rectus, Right	-0.00998288	-0.00837926	0.0105346	0.0123174	0.0268305	0.0256952	0.0341081	0.0163786	0.041917	0.0294712	0.0361613	0.0145049	-0.00048679	0.0106952	-0.0495556	-0.0244685	-0.0343012	-0.0400173	0.0313242
H0351.2002	medial orbital gyrus, Right	0.00421653	-0.000528979	0.0191009	0.0283449	-0.00225572	-0.00429123	-0.0434672	0.0198879	0.0334234	0.00396868	0.00112904	-0.0383439	0.00179781	-0.0278181	0.00263923	0.0303965	0.0485961	0.0316041	0.0175326
H0351.2002	lateral orbital gyrus, Right	0.019513	0.00968076	0.0189609	0.0115807	-0.00569535	-0.00141956	-0.0208114	0.00316523	0.0353122	0.00160265	0.01535	-0.0178343	-0.00851459	-0.0174654	0.00612082	0.015875	0.0223143	0.00647926	0.0272866
H0351.2002	Cingulate gyrus, frontal part, Left, inferior bank of gyrus	-0.0261264	-0.0169854	0.0211822	0.0339672	0.0106256	0.000136166	-0.0273489	0.00948886	0.036294	-0.00742615	0.00476506	-0.0192487	0.00727738	-0.0232757	0.00353141	0.0235277	0.0318825	0.00329794	0.0389244
H0351.2002	Cingulate gyrus, frontal part, Right, inferior bank of gyrus	-0.0312652	-0.0228959	0.00354109	0.0139425	0.0227439	0.0139272	0.017661	0.0315619	0.0346851	0.015047	0.0171552	0.0076612	0.0132776	0.00369066	-0.0124803	-0.00518588	0.00138815	-0.0057643	0.02507
H0351.2002	superior rostral gyrus, Left	0.00133435	0.0144031	0.0240246	0.0329895	0.0157723	-0.00892148	-0.0378895	0.0213214	0.0345545	-0.00217196	0.010165	0.00564423	-0.00250939	0.000423022	0.00516695	0.00107849	0.0114176	-0.0084756	0.0236125
H0351.2002	inferior rostral gyrus, Left	-0.02465	-0.0191332	-0.00533824	0.00354374	0.00254046	0.0110733	0.0240378	0.00131854	0.0322011	0.00922674	0.0160576	0.0167022	-0.00253242	-0.00042347	0.0316746	0.0262208	0.017545	0.0264353	0.0069477
H0351.2002	gyrus rectus, Right	-0.0130933	-0.0124572	0.0116954	0.0154185	0.0239418	0.0133347	0.00421797	0.0149117	0.0301657	0.00221552	0.0111773	0.00907044	0.029678	-0.0032662	-0.00573784	0.00923798	0.0152158	0.00973675	0.0156378
H0351.2002	middle frontal gyrus, Right, inferior bank of gyrus	0.0298772	0.0208263	0.0254984	0.0244541	0.00367469	0.00285976	-0.0239586	0.0206318	0.0410198	0.0248397	0.0252946	-0.0169827	-0.0143053	-0.00839235	-0.0481848	-0.0292965	-0.0223864	-0.02799	0.0303392
H0351.2002	Inferior frontal gyrus, triangular part, Right	-0.00205287	-0.0212159	0.00559073	-0.0165559	0.0285871	0.0455208	0.0432801	0.0128133	0.0313223	0.0238325	0.0235783	0.0327711	-0.00654434	-0.00449248	0.0083338	0.0123062	0.0259757	0.0241332	0.00322254
H0351.2002	lateral orbital gyrus, Right	0.0025531	-0.0170622	0.00445736	-0.00445933	-0.00459241	0.0135421	0.0138375	-0.000869978	0.0377943	0.00617858	0.0166413	-0.0191595	-0.00565329	-0.0258486	0.0250919	0.0366846	0.0239747	0.0180984	0.024857
H0351.2002	Inferior frontal gyrus, triangular part, Left	0.0121253	0.00214127	0.00214539	-0.000186367	0.0103644	0.0277644	0.0374696	0.0095784	0.0250973	0.0254436	0.0164662	0.0239468	-0.000625158	0.0210038	-0.0241899	-0.0140634	0.000399484	-0.000955379	0.0140039
H0351.2002	Inferior frontal gyrus, triangular part, Left	-0.00106898	-0.0182232	-0.0131237	-0.0198295	0.00676417	0.0211234	0.0385069	-0.000165535	0.0232504	0.00602732	0.00587808	0.0298212	0.00102632	0.00566578	0.0429862	0.0441897	0.0256748	0.0470178	0.0126289
H0351.2002	superior frontal gyrus, Left, medial bank of gyrus	0.00162015	0.00516948	0.02593	0.0350444	0.00343906	0.0080949	-0.0114438	0.0120718	0.0372942	0.00155421	0.0132933	-0.0307442	-0.0112618	-0.00612549	-0.0557788	-0.0317237	0.00308195	-0.0142522	0.0338775
H0351.2002	superior frontal gyrus, Right, medial bank of gyrus	0.00263633	0.0102551	0.0200623	0.0322162	0.008638	0.00989179	-0.00147308	0.0289769	0.0361423	0.0133409	0.0243843	-0.00814128	-0.00955292	0.00846239	-0.0538441	-0.0365929	-0.0312807	-0.0420029	0.0283353
H0351.2002	middle frontal gyrus, Right, superior bank of gyrus	0.0158134	0.000581803	0.0162893	0.0128946	-0.0123406	0.00375291	-0.0297438	0.0123398	0.0302633	0.00643	0.00184072	-0.0481239	-0.00546204	-0.0309417	-0.00998176	0.0305221	0.0499349	0.0369553	0.0222503
H0351.2002	middle frontal gyrus, Right, inferior bank of gyrus	0.0402609	0.0211895	0.0207419	0.0104203	0.00478806	0.00323944	-0.0115949	0.00192023	0.0317534	0.00582545	0.00772251	-0.0133827	-0.00223213	-0.00509157	0.000530843	-0.00937817	0.0222058	0.0181019	0.0268894
H0351.2002	Inferior frontal gyrus, triangular part, Right	0.0339675	0.0258844	0.0189498	0.00868339	0.0164182	0.00321598	0.00904976	-0.00493776	0.0323342	0.0159059	0.0220707	0.0180801	-0.00681696	0.0119177	0.0221352	-0.0102424	-0.00621885	-0.0157177	0.0163142
H0351.2002	frontal operculum, Right	0.00787731	0.00305318	0.013612	0.0140055	0.0289476	0.0160696	0.0265628	0.0243622	0.0375639	0.0187116	0.0279428	0.019641	0.0055071	0.0150587	-0.0352853	-0.0192566	-0.0229991	-0.0302041	0.0173268
H0351.2002	Short Insular Gyri, Right	-0.00630702	-0.000388402	0.0243918	0.0325007	0.0238174	0.00828844	-0.00375593	0.0321839	0.0376578	0.0059815	0.0219196	-0.012277	0.00358502	0.00172339	-0.0533643	-0.0148609	-0.0241807	-0.0487707	0.0174706
H0351.2002	post central gyrus, Left, superior lateral aspect of gyrus	0.0141509	0.00347261	-0.0204726	-0.0323075	0.0252346	0.0373902	0.0611062	0.0102558	0.0266007	0.0383515	0.0242023	0.0536535	0.0278495	0.0471135	0.00972513	0.0084206	-0.00782611	0.0150641	0.021148
H0351.2002	post central gyrus, Left, inferior lateral aspect of gyrus	0.0122159	0.0148606	0.00801664	0.00624815	0.0296865	0.0230781	0.0268783	0.01198	0.0266348	0.0216823	0.0217535	0.027544	0.00800003	0.0356221	-0.0417976	-0.00716758	-0.0384683	-0.034249	0.012387
H0351.2002	Heschel's gyrus, Left	0.0311117	0.0188996	-0.00371733	-0.00537934	-0.000992492	0.0134265	0.0108645	-0.0149647	0.0246588	0.0262296	0.00635076	0.0112456	0.0172447	0.0172228	0.00960447	0.0131527	0.00768408	0.0178747	0.0142757
H0351.2002	planum temporale, Left	0.0235297	0.0210098	0.00272209	-0.00236999	0.0213745	0.00924625	0.0185959	-0.00178935	0.0258417	0.0229847	0.0188825	0.0401244	0.00658872	0.0324611	0.0160678	0.000740246	-0.00392371	8.16061e-05	0.00521782
H0351.2002	planum polare, Left	0.0157393	0.0171413	0.0136638	0.0106985	0.0316234	0.00405024	0.0185007	0.00751859	0.0365726	0.0269178	0.033638	0.0118112	0.00774373	0.0205597	-0.0143982	-0.00941403	-0.0305787	-0.0431893	0.0256275
H0351.2002	precentral gyrus, Right, bank of the precentral sulcus	0.0373134	0.0241536	0.00969182	0.0015271	0.0153069	0.0172359	0.0292005	0.00983026	0.0306742	0.0277348	0.0191541	0.0118442	0.0205469	0.030587	-0.0201776	-0.0144138	-0.0187682	-0.012121	0.0240932
H0351.2002	precentral gyrus, Right, superior lateral aspect of gyrus	0.0259601	0.014489	0.00204084	-0.00282966	-0.000653478	0.00786345	0.0112379	-0.00730119	0.0103653	0.000253539	-0.012329	-0.00431383	0.0245926	0.0134854	0.0388327	0.0234619	0.0546436	0.0590704	0.00526538
H0351.2002	middle frontal gyrus, Right, inferior bank of gyrus	0.0439783	0.0341252	0.0352258	0.0195858	0.0107402	-0.0105768	-0.0262648	-0.00458629	0.0346851	-0.0021725	0.0141035	-0.00858274	-0.00691947	-0.00172828	0.00629907	-0.00438982	0.011289	-0.018006	0.0204418
H0351.2002	post central gyrus, Right, bank of the central sulcus	0.0478467	0.0141417	0.0015082	-0.0282614	-0.000840533	-0.000215544	0.000344492	-0.0381945	0.0367205	0.0225061	0.019262	-0.00726324	0.00748818	-0.00862292	0.0482178	0.0356831	0.0349161	0.0400189	0.0159028
H0351.2002	post central gyrus, Right, superior lateral aspect of gyrus	0.0363182	0.0319389	0.00283291	-0.00243589	0.00369648	0.0026181	0.00923003	-0.0188555	0.0262896	0.0216904	0.013098	0.0197141	0.0145153	0.0280215	0.012664	0.00678725	0.00571847	0.00614975	0.0144603
H0351.2002	precentral gyrus, Left, bank of the central sulcus	0.0415433	0.0171799	0.000716766	-0.0223209	0.0183229	0.0224863	0.0353516	-0.0120854	0.0252221	0.0199697	0.0205066	0.0292901	0.0137814	0.0279045	0.0141299	0.0134088	0.00540156	0.011179	0.00311759
H0351.2002	paracentral lobule, anterior part, Left, superior bank of gyrus	0.046608	0.0224505	0.00984483	-0.0102627	0.0188162	0.00238147	0.0172213	-0.0170702	0.0325349	0.0185967	0.0287475	0.0162111	0.00931355	0.0193441	0.0253079	0.0104649	0.0061634	-0.00197656	0.00878881
H0351.2002	paracentral lobule, anterior part, Left, inferior bank of gyrus	0.0334337	0.0160849	0.0117301	-0.00040551	0.00299832	-0.00623558	-0.00867658	-0.014829	0.0344561	0.0078915	0.0170922	-0.011333	0.00968879	-0.00584099	0.0305816	0.0305441	0.0268416	0.0124322	0.0213803
H0351.2002	post central gyrus, Left, bank of the central sulcus	0.0484982	0.0153391	0.00394456	-0.0189848	0.00282132	-0.00218234	0.000898375	-0.0216353	0.0376319	0.0215133	0.0243534	-0.0147865	0.00821277	-0.00175866	0.0287247	0.0188667	0.01066	0.0104802	0.0134813
H0351.2002	supraparietal lobule, Right, inferior bank of gyrus	0.0352307	0.0203562	0.018012	0.000644097	0.0041148	-0.00610168	-0.0118783	-0.0113051	0.0362905	0.00222175	0.0174794	-0.0245148	0.00331437	-0.00607489	0.00462357	0.0301125	0.0245577	0.000409526	0.0180487
H0351.2002	supramarginal gyrus, Right, superior bank of gyrus	0.0243006	0.0119177	0.0124339	-8.55373e-05	0.00515696	-0.00972155	-0.00145629	-0.00309773	0.0356873	0.00301341	0.0203501	-0.00923992	-0.00129617	-0.00171048	0.016047	0.0209968	0.0216581	0.00459116	0.0184197
H0351.2002	supraparietal lobule, Right, inferior bank of gyrus	0.0215608	0.00896714	0.012043	-0.00739242	0.0141838	-0.0188676	-0.00385394	-0.0108174	0.0346161	-0.0116089	0.0184118	0.0114387	0.00737781	-0.00738827	0.0757216	0.049716	0.0317541	0.0142715	0.0041869
H0351.2002	middle frontal gyrus, Right, inferior bank of gyrus	0.0309781	0.0229552	0.0220937	0.00867531	0.00637917	-0.00877284	-0.0119533	9.81867e-06	0.0319967	0.00212531	0.0135689	-0.0031219	0.0106978	-0.00512128	0.00463083	0.0159588	0.0111358	-0.0161377	0.0230106
H0351.2002	middle frontal gyrus, Left, inferior bank of gyrus	0.00539114	0.00742218	0.0149522	0.0054922	-0.00791373	0.0225393	0.00855333	0.00625407	0.0329056	0.01234	0.0129906	-0.0149464	-0.0143487	-0.018327	-0.0369224	-0.0151066	0.0174305	0.0107502	0.0192709
H0351.2002	frontal pole, Left, inferior aspect	-0.00731575	0.000801753	0.00860057	-0.00270579	0.0130662	0.0271359	0.0349845	0.00676045	0.0317402	0.0184062	0.0229903	0.0259801	-0.0186612	0.00729912	0.00859057	0.00956745	-0.00477923	-0.00189348	0.0151312
H0351.2002	paracentral lobule, anterior part, Left, superior bank of gyrus	0.0400668	0.0295983	0.0142804	-0.00251267	-0.00252162	0.016025	0.0093916	-0.0161168	0.02704	0.0193357	0.0094052	-0.00263707	0.0127097	0.0142827	-0.00726208	-0.00456222	0.00337363	-0.00777709	0.0160572
H0351.2002	post central gyrus, Left, superior lateral aspect of gyrus	0.0396007	0.0172228	0.0220719	-0.0043803	-0.00851827	0.0156697	-0.000523268	-0.0292468	0.0450726	0.0182802	0.0338846	-0.044199	-0.0263431	-0.0230601	-0.0732633	0.000699588	0.0136134	-0.019229	0.0253532
H0351.2002	supraparietal lobule, Right, superior bank of gyrus	0.0182358	0.0266828	0.0111264	0.000178897	0.00342797	0.0170666	0.0129798	-0.0105206	0.0242072	0.0138889	0.00730033	0.0064313	0.0494667	0.0197728	-0.0203729	-0.0118399	0.00268958	0.0028204	0.0180052
H0351.2002	precuneus, Right, inferior lateral bank of gyrus	0.0210785	0.00934163	0.0160101	-0.000705495	-0.00662214	0.0233678	0.0153266	-0.00527454	0.0420505	0.0187544	0.0295511	-0.0286388	-0.0255101	-0.0164486	-0.0442602	-0.0053365	0.0108794	-0.00750089	0.0289067
H0351.2002	Cingulate gyrus, parietal part, Left, superior bank of gyrus	0.0259218	0.0323767	0.0210397	0.0107791	-0.00640364	-0.00872672	-0.0195061	-0.0125015	0.0347328	0.0010459	0.0103887	-0.0128476	0.00261214	0.0059384	-0.0163639	0.00115222	0.00109177	-0.0213534	0.0229939
H0351.2002	Cingulate gyrus, parietal part, Right, superior bank of gyrus	0.0150835	0.0187567	0.00407299	-0.000789576	0.00623433	0.0171492	0.0256026	0.00610929	0.0267649	0.0224081	0.0130993	0.0155739	0.00614451	0.0210684	-0.00429127	0.00904745	-0.00231755	0.006154	0.0216615
H0351.2002	Cingulate gyrus, parietal part, Right, inferior bank of gyrus	0.0230994	0.0268467	0.0177213	0.0073166	-0.0121541	-0.00489126	-0.0152751	-0.00476547	0.0266688	0.00445849	0.00544008	-0.0184387	-0.00630933	-0.00268401	-0.00286735	0.00172224	0.0201956	0.0119503	0.00325181
H0351.2002	Cingulate gyrus, retrosplenial part, Right, superior bank of gyrus	0.00761508	0.0182999	0.00154926	8.7384e-05	-0.0118349	0.00845855	0.0130454	0.0057423	0.0259273	0.0125748	0.00730139	0.00422115	-0.00411036	0.012178	0.00364606	-0.00582237	0.0067751	0.0246239	0.0149795
H0351.2002	Cingulate gyrus, retrosplenial part, Right, inferior bank of gyrus	0.0308751	0.0261792	0.00574687	-0.000661416	0.000307112	-0.00892005	-0.00554402	-0.00140311	0.0251976	0.0165003	0.00916776	-0.0148064	0.0487428	0.0151855	0.0193439	0.0134615	0.0158657	0.0300092	-4.45117e-05
H0351.2002	middle temporal gyrus, Left, inferior bank of gyrus	0.0173811	0.0303458	0.0196061	0.0146929	0.00168127	-0.00585308	-0.016775	-0.00349044	0.0247593	-0.00422826	0.00189084	0.00249789	0.0128135	0.0110438	0.000669952	-0.00834499	0.0167427	0.00601356	0.0137122
H0351.2002	occipito-temporal gyrus, Left, superior bank of gyrus	0.0158205	0.0179119	0.0118461	0.00308245	-0.00354512	0.0103228	0.00295637	-0.00357946	0.0332832	0.00683293	0.0101002	-0.0148601	0.00295548	-0.0034149	0.00323504	0.0144635	0.0117452	0.0114979	0.0289327
H0351.2002	occipito-temporal gyrus, Left, inferior bank of gyrus	0.0293087	0.0386017	0.0104619	0.0123337	-0.0107973	-0.00674254	-0.0207538	-0.00185637	0.0239313	0.0120469	-0.000572076	-0.00695554	0.00824455	0.0252052	-0.0290675	-0.0254062	0.00274338	0.0119318	0.0164165
H0351.2002	middle temporal gyrus, Left, inferior bank of gyrus	0.0105673	0.0202247	0.0231371	0.0158734	-0.000849433	0.0121236	-0.00255533	-0.00127698	0.031288	0.00842426	0.0144616	-0.0216731	0.00673281	-0.00487205	-0.0392948	-0.0257281	0.00972949	-0.00361138	0.0155903
H0351.2002	middle temporal gyrus, Right, inferior bank of gyrus	0.0178816	0.0304683	0.0179432	0.0172035	-0.00273969	-0.0194544	-0.0301543	-0.00962138	0.0208269	-0.0107241	-0.00563714	-0.00847039	0.0545888	0.0102128	0.0235875	0.0165015	0.0318154	0.0239927	0.00150302
H0351.2002	inferior temporal gyrus, Right, bank of the its	0.0140809	0.0326082	0.0128994	0.0135699	-0.00227982	-0.0150061	-0.00941532	-0.00676553	0.0236822	-0.00606587	-0.00187776	0.00945389	0.0276956	0.0264066	0.00838791	0.00978203	0.0227822	0.0174581	0.0152976
H0351.2002	lingual gyrus, Right, peristriate	0.00806217	0.0123252	0.0148027	0.00357371	0.0150715	0.0129572	0.0193746	-0.00159713	0.0325932	0.0190468	0.024376	0.00288579	-0.00715992	0.00194144	0.0110458	0.0140028	-0.000840722	-0.00921392	0.0118134
H0351.2002	occipito-temporal gyrus, Right, inferior bank of gyrus	0.0132194	0.0163347	0.0186897	0.00750114	-0.00369151	0.00766827	0.00300042	-0.012867	0.0316742	0.00569583	0.0120858	-0.015644	-0.0178325	-0.00956746	-0.000749102	0.0013397	0.0217804	0.00455259	0.0157235
H0351.2002	supramarginal gyrus, Left, inferior bank of gyrus	0.0183695	0.0175701	0.0167554	0.00461154	-0.00897406	0.00969044	-0.0037534	-7.41687e-05	0.0305165	0.00863884	0.00942532	-0.0172068	-0.0123954	-0.0129869	-0.00568917	-0.0120309	0.0236092	0.0154561	0.00522685
H0351.2002	middle temporal gyrus, Left, superior bank of gyrus	0.0181576	0.0135686	0.00692712	-0.00592625	0.015857	0.0220028	0.0259594	0.00684467	0.0205345	0.0264705	0.0103779	0.0136988	-0.00426986	0.00749603	0.0485629	0.0105175	0.011612	0.031248	0.00496844
H0351.2002	lingual gyrus, Left, peristriate	0.0247631	0.0250946	0.012213	-0.000748575	0.00447529	0.00702126	0.00310276	-0.00654185	0.0347209	0.0185606	0.0131325	-0.00614738	-0.0009168	0.00954456	-0.0122347	-0.00884319	0.0118865	0.0105231	0.0288553
H0351.2002	lingual gyrus, Left, striate	0.044729	0.0311579	0.0146272	-0.0079408	-0.00455178	-0.00915309	-0.0235125	-0.0278567	0.0366372	0.0288355	0.0184556	-0.0148994	-0.000757393	-0.00188227	0.0128149	-0.000436908	0.0267795	0.0186477	0.027962
H0351.2002	Cingulate gyrus, retrosplenial part, Left, inferior bank of gyrus	-0.00970851	0.00414421	0.0120017	0.0125023	0.0118635	-0.0058544	0.000193388	0.0128696	0.0403095	0.00918655	0.0203507	-0.00854621	0.0119475	0.00294881	-0.0186481	0.0189878	0.00584048	-0.00881514	0.0235609
H0351.2002	Cingulate gyrus, retrosplenial part, Right, inferior bank of gyrus	-0.0105554	0.00545693	0.0166492	0.0129184	0.0208756	0.0083744	0.0175354	0.00788172	0.0359318	0.019427	0.026835	0.0026944	0.00969161	0.00292318	0.0120536	0.0045967	0.00217338	-0.0294295	0.0146303
H0351.2002	angular gyrus, Right, inferior bank of gyrus	0.0191187	0.0279268	0.0178675	0.0142029	-0.00732232	-0.00333794	-0.0150918	-0.0108732	0.0245264	-0.00204009	0.0014677	-0.0125371	0.037364	0.00538313	0.0157846	0.00990688	0.0103966	0.00255516	0.00199073
H0351.2002	superior temporal gyrus, Right, inferior bank of gyrus	0.031787	0.0306596	0.0240564	0.0119906	-0.014393	3.9041e-05	-0.0261844	-0.0164724	0.0293	0.00316206	0.00244002	-0.031249	0.000167149	-0.00752091	-0.0163959	-0.0178056	0.0250841	0.0122684	0.0191579
H0351.2002	middle temporal gyrus, Right, superior bank of gyrus	0.0260026	0.0273411	0.0112942	0.00419746	-0.0088129	0.0047316	-0.00430462	-0.00496593	0.0259229	0.0132721	0.00174878	-0.011606	0.005284	0.00798357	-0.00330689	-0.0112406	0.0191451	0.0353959	0.0295461
H0351.2002	post central gyrus, Left, inferior lateral aspect of gyrus	0.0310592	0.0280536	0.0217558	0.00753293	-0.0129326	0.0048857	-0.0131609	-0.0175719	0.0303288	0.00625287	0.00595076	-0.0255707	-0.00887252	-0.00670526	0.00154891	-0.020262	0.030039	0.0141615	0.0227708
H0351.2002	post central gyrus, Left, bank of the posterior central sulcus	0.0298049	0.0276359	0.0217579	0.0106013	-0.00681981	0.00192095	-0.0150465	0.00374674	0.0346161	0.0110328	0.0115754	-0.0131877	-0.00888792	-0.00598384	-0.0148981	-0.0126128	0.00311005	-0.0235573	0.0280115
H0351.2002	paraterminal gyrus, Right	-0.0274382	0.00041493	-0.0119543	0.0173881	0.0272191	-0.00979217	-0.00592835	0.0467316	0.0239098	0.0127192	-0.000658506	0.0449866	0.0414189	0.0467332	-0.00443124	0.00821166	-0.0108623	0.00433789	0.0466536
H0351.2002	parolfactory gyri, Left	-0.0318119	-0.00398501	-0.00670745	0.0165594	0.0193892	-0.0144337	-0.00903277	0.033762	0.029085	0.00351273	0.000810759	0.0240607	0.0340308	0.022484	0.00299093	0.0349439	0.0113328	0.0122171	0.0399079
H0351.2002	Head of Caudate Nucleus, Left	-0.0392661	-0.0648837	-0.00634117	0.0480746	0.04002	0.0252013	0.024586	0.0454395	0.0314287	0.0214658	0.0281583	0.0137643	-0.0244719	-0.00583538	0.00979538	-0.000647047	-0.0111621	0.0025476	0.00403266
H0351.2002	Putamen, Left	-0.046862	-0.0616044	-0.0186716	0.0388561	0.0342095	0.0246209	0.0285514	0.0394818	0.0251107	0.0132986	0.00975995	0.0378402	0.021031	0.0118458	0.00866886	0.0146109	0.0055489	0.0379037	0.00103583
H0351.2002	precentral gyrus, Left, superior lateral aspect of gyrus	0.0196595	0.00347069	0.0319752	0.00938543	-0.00570022	0.0058759	-0.00107991	-0.0068254	0.0470414	0.00652113	0.0368261	-0.048635	-0.00719522	-0.0384668	-0.0183663	-0.0148511	0.0203857	-0.0381869	0.0117269
H0351.2002	Putamen, Right	-0.0234634	-0.0486049	-0.0171375	0.0370067	0.0309458	0.0288933	0.0343166	0.0435892	0.0219616	0.0237633	0.0114327	0.0416971	0.00770462	0.0274263	0.0164274	0.00368004	-0.0131148	0.00975614	0.0107573
H0351.2002	globus pallidus, external segment, Right	0.00649983	-0.0466289	-0.0237685	-0.0701797	0.074051	0.0721251	0.0872082	0.0692492	0.0259824	0.0551132	0.0386586	0.0700263	0.0616516	0.0501995	0.0140701	0.0160767	-0.0127131	0.0293606	0.0139479
H0351.2002	Putamen, Left	-0.0265724	-0.0611095	-0.0078902	0.0373924	0.0301892	0.0223198	0.0317721	0.0400011	0.0380673	0.0234888	0.0389391	0.0150604	-0.0225445	-0.00257219	0.00238907	0.00978287	-0.0149366	-0.0203079	0.00979634
H0351.2002	globus pallidus, external segment, Left	0.00193915	-0.0340455	-0.0356407	-0.0616588	0.0633084	0.0515482	0.0826015	0.0575075	0.0104863	0.0411069	0.0121988	0.0838514	0.0364695	0.0642199	0.0586451	0.0736288	-0.0167653	0.0478057	0.0198095
H0351.2002	globus pallidus, external segment, Left	0.00115552	-0.0379533	-0.034337	-0.0726407	0.0616581	0.0536405	0.0822326	0.056476	0.0181021	0.0270904	0.0194764	0.0873001	0.0619691	0.0636267	0.0270054	0.0475777	-0.00135597	0.0617937	0.00754796
H0351.2002	Body of Caudate Nucleus, Left	-0.0309535	-0.0566977	-0.00995655	0.0461515	0.028145	0.0164436	0.00964795	0.0422586	0.0262412	0.00610695	0.00237975	0.022107	0.00645955	-0.00109013	-0.0069694	-0.00163188	0.0112272	0.0318027	0.0146268
H0351.2002	Body of Caudate Nucleus, Right	-0.0319107	-0.0478759	-0.0153377	0.0421509	0.0355366	0.006976	0.0167665	0.0443185	0.018661	0.00199432	0.000327285	0.0535831	0.00171928	0.0272206	0.027578	0.017395	-0.00181369	0.019271	0.00417438
H0351.2002	Head of Caudate Nucleus, Right	-0.0438091	-0.0554667	-0.0357598	0.0206081	0.0243894	0.0261411	0.0493558	0.0323759	0.0160461	0.0185655	0.00379782	0.0410475	0.0427037	0.0416542	0.0130897	0.0385333	-0.00700768	0.0611433	-0.000506561
H0351.2002	Putamen, Right	-0.0336805	-0.0572549	-0.0140211	0.0396232	0.0327615	0.032945	0.0341854	0.0410059	0.0273952	0.0244717	0.0164145	0.0250342	-0.00600232	0.0112303	0.0106479	0.00446883	-0.00532329	0.0204584	0.0131119
H0351.2002	precentral gyrus, Left, bank of the central sulcus	0.0337817	0.0133792	0.013157	-0.0113821	0.005417	0.0203075	0.0240427	-0.000984609	0.034203	0.0126642	0.0158896	-0.00580931	-0.00416938	-0.000354099	-0.0146978	0.0169052	0.0173668	0.00200962	0.022534
H0351.2002	post central gyrus, Left, bank of the central sulcus	0.044783	0.0260286	0.0202357	-0.00864348	0.0178798	0.000879051	-0.00131398	-0.0146374	0.0263139	0.0153193	0.020136	0.0123824	-0.00339386	-0.00537935	0.0630349	0.026628	0.0271547	0.0159599	0.005983
H0351.2002	post central gyrus, Left, superior lateral aspect of gyrus	0.0439711	0.0303176	0.0148217	-0.00630092	-0.000214689	0.0152589	0.0060468	-0.0185026	0.0304976	0.0232742	0.0145928	-0.00310471	0.00460402	0.00731526	-0.0133088	-0.00987733	0.00706175	0.00400254	0.0138024
H0351.2002	Head of Caudate Nucleus, Left	-0.0414262	-0.0615237	-0.0180619	0.0335396	0.0399605	0.0215159	0.036026	0.0399328	0.0241281	0.0165324	0.0167008	0.0404335	0.00208738	0.0144438	0.0282235	0.0215483	0.00280836	0.0298209	-0.00674207
H0351.2002	Putamen, Left	-0.0384068	-0.0567028	-0.0172675	0.0360899	0.0329916	0.0403767	0.0418642	0.041281	0.0274693	0.0259653	0.0176898	0.0362584	-0.0177911	0.0192491	-0.00902379	-0.0116873	-0.015165	0.0157779	0.0108661
H0351.2002	Nucleus Accumbens, Left	-0.0396628	-0.0325485	-0.0236475	0.0552451	0.0144119	-0.0193838	-0.0227358	0.042641	0.00464788	-0.00739753	-0.0132804	0.0497372	0.0230655	0.0328476	0.0363016	0.0346023	0.00110236	0.0352297	0.00700828
H0351.2002	Amygdaloid Transition zone, Left	-0.0323044	-0.0430912	-0.0166102	0.0234095	0.0474392	0.015254	0.0166191	0.0557973	0.0241906	0.0325592	0.0111702	0.0418226	0.0372265	0.026236	-0.0141623	0.0139262	-0.0116038	0.0125104	0.0255026
H0351.2002	post central gyrus, Right, superior lateral aspect of gyrus	0.0251625	0.0166244	0.0131683	0.00103435	0.00404875	0.0225114	0.015484	-0.00658254	0.0392617	0.0282693	0.0277728	-0.0163924	0.0314483	0.00685897	-0.0404013	0.000266801	-0.006329	-0.0219917	0.024166
H0351.2002	Putamen, Left	-0.0372366	-0.060409	-0.0180048	0.0367254	0.0276469	0.0158094	0.0353737	0.0350274	0.0323296	0.0193426	0.0280047	0.0243112	-0.00766791	0.0104815	0.0226756	0.0219047	-0.0159468	0.00512361	0.00886655
H0351.2002	superior temporal gyrus, Right, inferior bank of gyrus	0.0124636	0.018929	0.0112237	0.00498692	-0.00208372	0.0184004	0.0148841	0.000997388	0.0303022	0.013063	0.0135766	0.000244965	-0.0119241	0.00917138	-0.0308292	-0.0074322	-0.00675243	-0.00514938	0.0216813
H0351.2002	middle temporal gyrus, Right, superior bank of gyrus	0.00867477	0.0213366	0.0246414	0.0169126	0.00916133	-0.00914202	-0.0123995	0.00396246	0.0334427	-0.00879136	0.0100258	-0.00217374	-0.014542	-0.00210956	0.0227395	0.0182665	0.0105378	-0.023474	0.0230964
H0351.2002	inferior temporal gyrus, Right, lateral bank of gyrus	0.00743946	0.030412	0.0181577	0.0230367	-0.0105338	-0.00633523	-0.025934	-0.00647604	0.0187241	-0.0119158	-0.0155043	-0.00696527	0.0242317	0.0102363	0.0100314	-0.0044595	0.0231253	0.0221115	0.0131925
H0351.2002	supraparietal lobule, Right, superior bank of gyrus	0.0199198	0.0216007	0.0141334	0.00216431	0.00284663	0.0159046	0.0153731	-0.0132033	0.0293494	0.0137055	0.0144932	-0.00147878	-0.00218892	0.00914365	-0.00183435	0.00212178	0.00612428	0.00570774	0.0171934
H0351.2002	angular gyrus, Right, superior bank of gyrus	0.0172001	0.0132408	0.0207155	0.00115503	0.0143935	0.00399717	0.00922125	0.00162984	0.0340443	0.00492737	0.0259745	0.00860051	-0.0207511	-0.00798262	0.050861	0.0179703	0.0122497	-0.0124625	0.00887426
H0351.2002	superior temporal gyrus, Left, lateral bank of gyrus	0.0330964	0.0303098	0.0142948	0.000744312	-0.00624581	-0.00641624	-0.00957363	-0.0204695	0.0297824	0.00356888	0.00409214	-0.0111737	0.0143838	0.00366469	0.0153377	0.0284581	0.0275052	0.0266782	0.0258733
H0351.2002	superior temporal gyrus, Left, inferior bank of gyrus	0.0165386	0.0122213	0.0271839	0.0165171	-0.00689539	-0.00378109	-0.0221313	0.00855431	0.0418836	0.00323985	0.0268934	-0.0428934	-0.0322892	-0.0274897	-0.0509344	-0.00207427	0.0156979	-0.025781	0.0311189
H0351.2002	inferior temporal gyrus, Left, lateral bank of gyrus	-0.00985115	0.00787461	0.0142207	0.00902366	0.0212288	0.0147237	0.0239738	0.0121055	0.0288809	0.016817	0.0264435	0.0192808	0.0107544	0.00643341	0.0189894	0.00406295	-0.00758328	-0.0138185	0.00182558
H0351.2002	inferior temporal gyrus, Left, bank of mts	-0.00576781	0.0119979	0.00655751	0.00867019	0.00206696	0.0105915	0.0217625	0.0090383	0.0260633	0.0102131	0.0144018	0.0206557	-0.0174699	0.0177188	-0.00298912	-0.00171815	-0.00361235	-0.00716903	0.0196023
H0351.2002	supraparietal lobule, Left, superior bank of gyrus	0.0150257	0.0226851	0.0147025	0.00457697	0.0067221	0.0176535	0.0127251	-0.0055368	0.0291842	0.0164727	0.0152848	0.000745111	0.0124533	0.0124756	-0.016334	-0.0141532	0.000559916	-0.00296403	0.0201454
H0351.2002	inferior temporal gyrus, Right, bank of the its	0.0164297	0.0316021	0.0253579	0.0248028	-0.00358232	-0.0185026	-0.0287561	-0.00537335	0.0270207	-0.00265491	0.00908065	-0.0174813	-0.0118371	-8.27738e-05	0.0223204	0.0109863	0.00803059	-0.0155344	0.0109801
H0351.2002	fusiform gyrus, Right, bank of the its	-0.0136912	0.00314157	0.0157976	0.0139334	0.0109359	0.0105475	0.00747836	0.00407342	0.0250898	0.000334597	0.00762197	-0.00339547	0.0373696	-0.00598135	0.000119829	-0.00228156	0.0213785	0.0136856	-0.00141228
H0351.2002	paracentral lobule, anterior part, Left, superior bank of gyrus	0.0266282	0.0319471	0.0255982	0.0145807	0.000718419	-0.0205153	-0.028724	-0.0179141	0.0226201	-0.0207516	-0.00348151	0.000446916	0.0314851	0.00686318	0.057159	0.0267767	0.0352007	0.0147324	0.000551291
H0351.2002	paracentral lobule, anterior part, Left, inferior bank of gyrus	0.0176289	0.0145451	0.0199301	0.00814793	0.00976425	0.00568681	0.00526731	0.00689314	0.0315837	0.0076925	0.0137588	-0.00645041	0.0138036	0.000981077	0.00517077	0.00261329	0.0122156	-0.0041323	0.0125413
H0351.2002	paracentral lobule, anterior part, Right, superior bank of gyrus	0.0275651	0.0210187	0.0265881	0.0144608	0.000529101	0.00467433	-0.0116941	-0.00947458	0.0268962	-0.00316304	0.0047788	-0.0165324	0.000534144	-0.00528483	0.0263018	0.005877	0.0297095	0.00990839	0.0157925
H0351.2002	paracentral lobule, anterior part, Right, inferior bank of gyrus	0.0217568	0.0231523	0.0154342	0.00372579	-0.00325376	0.00499553	0.00487812	-0.00876176	0.0237761	0.000411222	0.00204458	-0.00336124	0.00539751	0.0090037	0.0182375	0.00613242	0.0273862	0.0250333	0.000710327
H0351.2002	Cingulate gyrus, frontal part, Left, superior bank of gyrus	0.010071	0.0188987	0.0288478	0.0215532	-0.000136151	-0.00603089	-0.0254768	-0.00319754	0.0281982	-0.00801399	1.43691e-05	-0.0111109	-0.0133601	-0.0116549	0.0115112	0.000740039	0.0299738	-0.0082287	0.0180967
H0351.2002	Cingulate gyrus, frontal part, Left, inferior bank of gyrus	0.00477499	0.000266453	0.0296019	0.0152907	0.00817866	0.0175919	0.000986125	0.00712027	0.0442631	0.00436862	0.0271969	-0.0301837	-0.00756471	-0.0252295	-0.0395326	-0.00236983	0.0176397	-0.040262	0.0319508
H0351.2002	Cingulate gyrus, frontal part, Right, superior bank of gyrus	0.00354906	0.0143916	0.0230277	0.0234643	0.0123399	-0.00418148	-0.0164701	0.018654	0.0362598	0.0119532	0.0128425	-0.00219198	0.00914812	-0.00348823	0.00892014	0.000483032	0.00161296	-0.0417144	0.0318377
H0351.2002	Cingulate gyrus, frontal part, Right, inferior bank of gyrus	0.0150812	0.0168403	0.0157002	0.00614498	0.0083603	0.0188339	0.0094302	0.00321672	0.0259985	0.0128945	0.00419859	-0.000370186	0.0279063	0.00752337	0.00713158	0.00274759	0.0230185	0.0186962	0.0151534
H0351.2002	inferior temporal gyrus, Right, bank of mts	0.0123163	0.0106458	0.0141427	0.01556	-0.00245348	-0.00357495	-0.0221696	0.00913402	0.0166295	-0.0025539	-0.00780922	-0.0100345	0.00920835	-0.0106706	0.0375272	0.0393106	0.0443809	0.0171321	0.00278469
H0351.2002	precuneus, Right, inferior lateral bank of gyrus	0.00665395	0.00415415	0.0128929	0.00554295	0.0262296	0.00441735	0.0115341	0.0104851	0.0287458	0.0121741	0.0152214	0.0123153	0.0157986	0.00796761	0.0362173	0.019358	0.0283068	0.020012	0.0125992
H0351.2002	inferior rostral gyrus, Right	-0.00605232	0.0021365	0.0262982	0.0244363	0.0183362	0.0169379	-0.00501277	0.0142731	0.0272443	-0.00735137	0.00769944	0.00441669	-0.0200452	-0.01797	-0.00226194	-0.00785406	0.0260829	0.00056764	0.0193955
H0351.2002	frontal operculum, Right	0.00281113	-0.00159963	0.0172197	0.0159336	0.00529105	0.0233901	0.0150339	0.0124582	0.0303098	0.0167465	0.0143648	-0.0133137	-0.0119627	-0.0162877	-0.0218941	-0.015935	0.0139046	0.00474656	0.0170926
H0351.2002	angular gyrus, Left, inferior bank of gyrus	0.0138366	0.0244994	0.0118358	0.0160293	0.00377291	-0.00761629	-0.00478717	0.0117855	0.0306252	0.0109401	0.0122358	0.00706802	0.0139878	0.0223488	-0.016257	-0.0115485	-0.0111493	-0.00521744	0.0168037
H0351.2002	middle temporal gyrus, Left, superior bank of gyrus	0.0126339	0.0207562	0.00923848	0.0168988	0.00641738	-0.0114426	-0.00961776	0.0151247	0.0344853	0.01128	0.0162984	0.00628328	0.0098467	0.0193048	0.00134691	0.00525716	-0.0060278	-0.00183806	0.0202017
H0351.2002	middle temporal gyrus, Left, inferior bank of gyrus	0.0154842	0.0167243	0.00543508	0.00516882	0.000115805	-0.000974148	0.000715153	-0.00458626	0.0277636	0.00482661	0.00207906	0.00135593	0.0214328	0.0140061	0.0102201	0.0337978	0.0367352	0.042176	0.00976527
H0351.2002	middle temporal gyrus, Left, superior bank of gyrus	0.0126798	0.0184822	0.0165823	0.0165466	0.0121849	0.00119946	0.000628516	0.0144524	0.0328926	0.00997641	0.0188404	0.00389394	-0.00125172	0.0135751	-0.0221584	-0.0140498	-0.01402	-0.0287495	0.0246795
H0351.2002	inferior temporal gyrus, Right, lateral bank of gyrus	-0.0025267	0.0262027	0.0220314	0.0247379	0.00302966	0.0010168	-0.0186859	0.00217186	0.0199239	-0.0328224	-0.00971577	0.0141347	-0.0117191	0.0177877	-0.028356	0.0020818	-0.00377027	-0.0105498	0.00877688
H0351.2002	precuneus, Left, , superior lateral bank of gyrus	0.014256	0.018022	0.0233815	0.0183585	0.00189034	-0.00385541	-0.0136546	-0.00514628	0.035783	0.0034209	0.0170067	-0.0130316	0.00117463	-0.00426835	-0.00423199	-0.00524985	-0.00583741	-0.0258621	0.0172137
H0351.2002	precuneus, Left, , inferior lateral bank of gyrus	0.0279708	0.0198904	0.0217939	0.0129628	-0.00200643	0.00665483	-0.0123513	-0.00484403	0.016508	0.011284	0.0019179	-0.0165653	0.00300617	-0.00594761	0.0265327	0.0089305	0.0252892	0.00304175	0.0069764
H0351.2002	precuneus, Right, superior lateral bank of gyrus	0.00905062	0.0282264	-0.010355	0.0112657	-0.0132623	-0.0288657	-0.0211344	-0.00663653	0.00819317	-0.0124323	-0.0194183	0.00962856	0.0473537	0.0390518	0.0549027	0.0632544	0.0377597	0.0704968	-0.0103374
H0351.2002	angular gyrus, Right, inferior bank of gyrus	0.0100352	0.0157205	0.0105	0.0137913	-0.00316892	-0.0185368	-0.0221235	-0.00645408	0.0276967	-0.0122202	0.00122026	-0.00276629	0.01024	-0.00187137	0.0537697	0.0577298	0.0448803	0.0438779	0.00825984
H0351.2002	middle temporal gyrus, Right, inferior bank of gyrus	0.0174718	0.0218407	0.00752672	0.0119109	-0.0012991	0.00966743	0.0071286	0.00554186	0.0223045	0.0192505	0.0106288	0.00384712	0.00216618	0.0176079	0.00884123	-0.00309401	0.00884979	0.0165466	0.0015816
H0351.2002	cuneus, Left, peristriate	0.0187243	0.0281167	0.0196118	0.0231292	0.00364108	-0.00484041	-0.0188847	-0.00619025	0.0230836	0.011291	0.004936	-0.00029784	0.0204077	0.0233829	0.0047131	-0.00500236	-0.0063665	-0.0191925	0.0171541
H0351.2002	lingual gyrus, Left, peristriate	0.0258661	0.0174746	0.0150879	0.00223123	-0.000866672	-0.0184125	-0.0211132	-0.0218518	0.0405224	0.00737877	0.0241643	-0.0213697	-0.00460948	-0.0133486	0.034963	0.0516741	0.0426985	0.0245528	0.0144428
H0351.2002	lingual gyrus, Left, striate	0.046676	0.0243861	0.0239902	-0.000327985	0.00908911	-0.00238369	-0.0216106	-0.0275211	0.0336932	0.0300796	0.0252541	-0.0143861	0.00420717	-0.00747747	0.0258253	0.015074	0.0220758	-0.0105502	0.0244053
H0351.2002	lingual gyrus, Right, striate	0.0351507	0.0178918	0.00610685	-0.00754253	0.00760332	0.0126709	0.0135393	-0.0105906	0.0398759	0.04301	0.0303342	0.000552511	0.00579721	0.00805288	0.0021503	-0.00519573	-0.00566344	-0.005475	0.0279346
H0351.2002	Cingulate gyrus, retrosplenial part, Right, inferior bank of gyrus	0.0181935	0.00865482	0.0149026	0.00974812	0.00934768	0.0222857	0.00898337	0.00454386	0.0220402	0.0237346	0.00847225	-0.0108206	0.00521738	-0.00168037	-0.0179519	-0.0193584	0.0107994	-0.0143239	0.0188489
H0351.2002	inferior temporal gyrus, Right, bank of the its	0.0112396	0.0134754	0.0175031	0.0138654	0.0121031	0.00545743	0.00671267	0.0118281	0.0323574	0.0143996	0.0214286	0.00709246	0.00246652	0.00338425	-0.00825963	-0.00981304	-0.00875604	-0.0253625	0.0115435
H0351.2002	lingual gyrus, Right, peristriate	0.0291934	0.0176378	0.0121317	0.000572488	0.0123071	-0.00551445	-0.00179806	0.00136925	0.0405189	0.0242646	0.0269021	0.00241702	0.00809096	0.00372403	-0.00192505	0.00335492	-0.0048979	-0.0161954	0.0162957
H0351.2002	occipito-temporal gyrus, Right, superior bank of gyrus	0.0110232	0.0041651	0.0133885	0.00359674	0.0139906	0.0261284	0.0264223	0.00424726	0.0290783	0.0270184	0.0250684	0.000723633	-0.00676019	-0.00277939	3.38706e-05	-0.0148561	0.0134478	0.00354857	0.0112393
H0351.2002	occipito-temporal gyrus, Right, inferior bank of gyrus	0.0147706	0.0106991	0.0126749	0.00470911	-0.00894857	-0.00314415	-0.00661058	-0.0211988	0.0380989	0.0011016	0.0141739	-0.0288149	-0.00968501	-0.0173072	0.0184942	0.0414289	0.0443987	0.0333353	0.019468
H0351.2002	inferior temporal gyrus, Left, bank of the its	0.00323573	-0.00284046	0.00787387	-0.00178262	0.0161076	0.0297367	0.031557	0.00826792	0.0305272	0.0221849	0.0207997	0.0131681	0.0066598	-0.0048725	0.00264406	-0.00352852	0.0213136	0.0136508	0.0260207
H0351.2002	inferior temporal gyrus, Left, lateral bank of gyrus	0.0230715	0.0245321	0.0176944	0.010212	0.0104221	-0.00229624	0.000752521	-0.00700834	0.0354054	0.01392	0.0230233	0.00683933	-0.00154585	0.00821296	0.0163651	0.00430837	-0.00307346	-0.0127394	0.0227067
H0351.2002	precentral gyrus, Right, inferior lateral aspect of gyrus	0.0215018	0.0143551	0.00931195	0.000301448	0.000222524	0.0141571	0.0221783	-0.0085366	0.0312776	0.00739816	0.0145638	-0.000211015	0.00480472	0.00995113	0.00353155	0.00113923	0.0170501	0.0186107	0.0031294
H0351.2002	precentral gyrus, Right, bank of the central sulcus	0.0314902	0.0175078	0.0168125	0.00119985	0.00410705	0.0201226	0.0221103	-0.00206844	0.0345627	0.0143985	0.0188842	-0.00794887	0.00083776	0.00825098	-0.0417319	-0.0241731	-0.0130859	-0.0230135	0.0159755
H0351.2002	post central gyrus, Right, bank of the central sulcus	0.0347953	0.0165824	0.00717712	-0.00240965	-0.00206345	0.0291907	0.013941	-0.00573694	0.0226132	0.0304906	0.00423087	0.000432061	0.00793772	0.0051106	-0.0464986	-0.0285865	-0.00859254	-0.0154908	0.0187308
H0351.2002	post central gyrus, Right, superior lateral aspect of gyrus	0.0296994	0.0134162	0.00773741	-0.00236684	0.00151259	0.0190933	0.0159811	-0.0137491	0.0285934	0.0259906	0.0168968	-0.0076285	0.00441633	-0.0025031	0.0120731	0.00618067	0.0224981	0.0302086	0.0140986
H0351.2002	precentral gyrus, Left, bank of the precentral sulcus	0.0143038	0.00723816	0.00226366	-0.00274175	-0.00705818	0.00128915	0.0106757	-0.0065363	0.0290466	-0.0133428	0.00408588	-0.00536083	0.000101073	-0.00225529	0.0354337	0.0483822	0.0428941	0.0495739	0.00160019
H0351.2002	middle frontal gyrus, Left, inferior bank of gyrus	0.00795662	0.0073962	0.0188707	0.0138852	0.0104178	0.00960142	0.00771159	0.0121742	0.0360808	-0.0002077	0.0135115	0.00497022	-0.00960968	-0.00605044	0.00190651	0.0057969	0.0101002	-0.00224077	0.0187591
H0351.2002	Heschel's gyrus, Right	-0.00172405	0.0124238	0.00289933	0.0168926	-0.00783578	0.00551227	0.00634015	-0.00152119	0.0359247	0.0110258	0.00804875	-0.00369849	0.0100576	0.0135583	-0.00741452	0.0113766	0.0118513	0.0234392	0.037538
H0351.2002	planum polare, Right	-0.00197227	0.0121049	0.0137279	0.0199061	-0.00225604	0.0202347	0.00877253	0.00533515	0.0276448	0.0210164	0.0114125	-0.011047	-0.0143647	0.00549961	-0.0497959	-0.02116	-0.0113147	-0.0152669	0.0225537
H0351.2002	Long Insular Gyri, Right	-0.0111019	0.0113285	0.020048	0.0306248	0.000832331	-0.00637675	-0.0270914	0.00339864	0.0320418	-0.00450918	0.00433908	-0.014013	0.00253734	-0.00623808	-0.00204301	0.000482618	0.0236315	0.0147419	0.00924198
H0351.2002	Putamen, Right	-0.0429178	-0.0736145	-0.0279688	0.0377793	0.0257484	0.0220563	0.0340691	0.0413552	0.0259237	0.00656548	0.0103351	0.0289563	8.71211e-05	0.0101985	0.00970797	0.0410993	0.0195303	0.0533708	-0.00181075
H0351.2002	globus pallidus, external segment, Right	-0.000569381	-0.0597129	-0.016683	-0.0585169	0.0669455	0.0750097	0.0851512	0.0670375	0.0319324	0.0437572	0.0386653	0.0481061	0.00468413	0.031993	-0.0115509	-0.00494395	-0.00566545	0.016265	0.0250034
H0351.2002	superior frontal gyrus, Left, medial bank of gyrus	-0.00234838	0.00521835	0.00914004	0.0134831	0.00158829	0.00519978	0.014357	0.00794029	0.0342251	0.0021576	0.0161297	0.00311669	0.00379027	0.00554753	0.0253717	0.00179981	-0.00358372	-0.00414785	0.0190773
H0351.2002	superior frontal gyrus, Right, medial bank of gyrus	0.0128728	0.0116323	0.0209597	0.0207944	0.00124806	0.00652061	-0.00619606	0.0107246	0.027092	0.00605612	0.00911725	-0.0192968	-0.00701599	-0.00899589	0.00867587	0.00242025	0.0209527	0.00770023	0.02173
H0351.2002	Cingulate gyrus, frontal part, Left, superior bank of gyrus	-0.0064569	0.0128114	0.0117028	0.024787	0.00434067	0.00702226	0.000584408	0.0172665	0.0237175	0.00240935	-0.000513285	0.00764021	0.00328756	0.0145158	-0.0165527	-0.0229412	-0.0118317	-0.00796805	0.0197131
H0351.2002	Cingulate gyrus, frontal part, Left, inferior bank of gyrus	-0.0247251	-0.00539864	0.00272604	0.0143832	0.0172925	0.0127117	0.0237779	0.0139387	0.0275334	-0.000922257	0.00743637	0.0232693	0.0242606	0.0170882	0.00129801	0.00738521	0.0165523	0.0166669	0.0145003
H0351.2002	Cingulate gyrus, frontal part, Right, superior bank of gyrus	8.50369e-06	0.0112337	0.011351	0.0174607	0.00770338	0.0054099	0.00885567	0.0139144	0.0271741	-0.00139454	0.00506951	0.0178387	0.00919948	0.0175895	-0.0125109	-0.00941414	-0.00777307	-0.00869087	0.0142989
H0351.2002	Cingulate gyrus, frontal part, Right, inferior bank of gyrus	-0.0127626	0.0153628	0.00759754	0.0277575	0.010322	-0.0107386	-0.00825583	0.0213796	0.0256974	-0.00538125	0.00142406	0.0237213	0.0291366	0.0334577	0.00955839	0.00030362	-0.0101886	-0.00199183	0.0123402
H0351.2002	Body of Caudate Nucleus, Left	-0.0490139	-0.0759436	-0.0174625	0.0523385	0.0376844	0.00806928	0.00166193	0.0645076	0.0350474	0.00591102	0.0108012	0.0406502	-0.00401755	-0.00214171	-0.0018974	0.00916555	0.00444543	0.0152149	0.0248012
H0351.2002	Body of Caudate Nucleus, Right	-0.0440974	-0.078821	-0.0116925	0.0528277	0.038979	0.028043	0.0201516	0.0554209	0.0261821	0.0133887	0.00952022	0.0295402	-0.00290126	-0.0118295	0.0151484	-0.001121	0.0108215	0.0148933	0.0160912
H0351.2002	corpus callosum	-0.0867038	-0.100982	-0.0578863	-0.0770789	0.0700189	0.0787379	0.100504	0.0737307	0.0298498	0.0682974	0.0498979	0.109742	0.0789032	0.0610775	0.000535595	0.0135127	-0.0103714	0.0577157	0.0278606
H0351.2002	middle temporal gyrus, Right, superior bank of gyrus	0.0213134	0.0248524	0.0205403	0.0189581	0.00990327	0.00546791	-0.00701799	-0.0020556	0.0272177	0.0183621	0.0134126	-0.00390369	0.00285464	0.0115292	-9.16305e-05	-0.00296567	-0.00118291	-0.0107974	0.0225287
H0351.2002	Nucleus Accumbens, Right	-0.0108075	-0.0304992	-0.00621973	0.0228534	0.0241822	0.00614028	0.0111102	0.0258882	0.0296623	0.00683526	0.0127421	0.0266221	0.0214883	0.0108021	0.00477732	0.00212954	0.00781944	0.0259312	0.00905289
H0351.2002	Claustrum, Right	-0.00195148	0.00382575	0.000649521	-0.00992421	0.00977418	0.0139188	0.0356141	0.00686377	0.0316798	0.0175126	0.02337	0.0043198	0.0337028	0.0192664	0.00944346	0.0185476	-0.00522629	0.00346599	0.000863371
H0351.2002	Claustrum, Left	0.00345243	0.0107363	0.00880645	-0.00381163	0.0186416	0.0188576	0.0258469	0.0156735	0.0295922	0.007287	0.0144644	0.00691501	0.0207646	0.0213453	-0.0367672	0.000398328	-0.0117	-0.00592731	0.0126867
H0351.2002	Nucleus Accumbens, Left	-0.0101456	-0.0298256	0.00165629	0.0257011	0.0302628	0.0178404	0.0153584	0.0275246	0.0311354	0.00780021	0.0171359	0.0258269	0.0140185	0.00737944	-0.0279823	-0.0243919	-0.00891811	0.000873326	0.00892034
H0351.2002	Claustrum, Right	0.0138446	0.0240796	0.0132657	0.00206353	-0.000306729	-0.00280483	0.00736405	-0.00398196	0.0268021	-0.00594965	0.00999509	0.00380201	0.0074399	0.0144205	0.00369631	0.00224266	0.00139535	-0.000154955	0.0080139
H0351.2002	Claustrum, Left	0.00871049	0.0206489	0.0103871	0.00216005	0.00749927	0.0023143	0.0137489	0.0045615	0.0271658	0.00364404	0.0097784	0.005291	0.0366382	0.0220975	0.00136407	-0.000105073	-0.000647443	0.00207714	0.0126613
H0351.2002	Nucleus Accumbens, Left	-0.00540821	-0.0273563	-0.00465879	0.0298771	0.015031	0.00121722	0.00625368	0.0295508	0.0313901	0.0331463	0.0242167	-0.00283714	0.0299481	-0.00130436	-0.00517823	0.0128011	-0.00301966	-0.0029807	0.0198486
H0351.2002	Nucleus Accumbens, Right	-0.0147822	-0.0338564	-0.00357129	0.0223107	0.0267457	-0.00270786	-0.00184211	0.0266605	0.0303178	0.00159677	0.012416	0.0339434	0.00795016	-0.00775163	0.0351903	0.0371639	0.047267	0.0476391	0.00886662
H0351.2002	Nucleus Accumbens, Right	-0.0100079	-0.0345785	0.013152	0.0249819	0.0279846	0.014682	0.0048288	0.0264557	0.0458279	0.0246212	0.0350291	0.00799068	-0.0271518	-0.029096	-0.0134949	-0.0248039	0.00662345	-0.0147017	0.0260075
H0351.2002	Substantia Innominata, Right	-0.00561946	-0.018235	0.00396264	0.0185702	0.0294126	0.00413994	0.0087814	0.0232537	0.0307765	0.00436988	0.0167695	0.0208007	0.0230467	-0.000419674	-0.00356042	0.0119781	0.000308848	-0.00146449	0.00984497
H0351.2002	Claustrum, Right	0.0156618	0.0263289	0.00635845	0.00113529	-0.0119819	-0.00458965	0.00501846	-0.013285	0.0226724	-0.00325726	0.00150349	-0.0100335	0.0457918	0.0213507	0.0216366	0.0189185	-0.0040346	0.00656125	0.0102105
H0351.2002	globus pallidus, external segment, Right	0.0164929	-0.022843	-0.00858807	-0.0440659	0.0469578	0.0487436	0.0608711	0.0451841	0.0257565	0.0232744	0.0190096	0.0459661	0.00469965	0.0271764	-0.0359644	0.00911293	-0.0133867	0.00633359	0.0203737
H0351.2002	Lateral Nucleus, Right	0.00267806	0.0167685	0.00498491	0.0055523	0.0020743	0.00437856	0.0148599	0.00720035	0.0227353	0.00132271	0.00664308	-0.000233777	0.0115578	0.0166779	0.00700399	0.00872964	0.0151625	0.0197309	0.00170791
H0351.2002	Amygdaloid Transition zone, Right	-0.00670867	0.00688088	0.00713561	0.00218983	0.0118179	0.0115288	0.0110314	0.0111487	0.0256338	-0.00483325	0.00482628	0.0069053	0.0143973	0.00830565	-0.00160718	0.00459233	0.0245373	0.022468	0.0159904
H0351.2002	Basolateral Nucleus, Right	0.00269916	0.0181141	0.0122606	0.00931218	0.0103331	0.011483	0.0129994	0.00764899	0.0221529	-0.000473059	0.00548269	0.0181774	1.36508e-05	0.0128876	-0.0286548	-0.0186612	-0.0117719	-0.0113054	0.0109562
H0351.2002	Basomedial nucleus, Right	0.00422512	0.0133232	0.0193027	0.0116827	0.00974021	0.0198	0.0102353	0.00966055	0.0233765	-0.00338233	0.0102917	-0.00727925	-0.0114892	-0.00405231	-0.0326064	-0.0114396	0.00732984	-0.00766484	0.005857
H0351.2002	Substantia Innominata, Left	-0.00329085	-0.0212933	0.00987101	0.016316	0.0308396	0.0162633	0.00663683	0.0240946	0.036069	-0.00103998	0.0168508	0.0283612	-0.00856741	-0.0122285	-0.00655825	-0.0184039	0.0122504	0.00502888	0.019045
H0351.2002	Septal nuclei, Left	0.00779156	-0.0112707	-0.00472875	-0.021526	0.02703	0.0191936	0.0345302	0.0355812	0.0294067	0.0112298	0.0134294	0.0417478	0.0130173	0.0219287	-0.0237159	-0.0107379	0.00484712	0.0193962	0.0372199
H0351.2002	Septal nuclei, Right	-0.00577625	-0.0213799	0.00172065	0.00774845	0.0236136	0.0127228	0.0212168	0.0350279	0.0438594	0.0270461	0.0354485	0.0107489	-0.013515	-0.00359426	-0.0276237	-0.0167961	-0.00389577	-0.0198083	0.0310569
H0351.2002	globus pallidus, external segment, Left	0.00762703	-0.0350303	-0.0059832	-0.0359102	0.0334725	0.0501006	0.0666757	0.0371004	0.0399959	0.0469412	0.0473381	0.0167053	-0.0180994	0.0060979	-0.0311345	-0.00933127	-0.00807323	0.0039883	0.0208919
H0351.2002	Claustrum, Left	0.026824	0.0375797	0.00451336	0.00726482	-0.0146602	0.0131983	0.0145285	0.000127897	0.0114916	0.0225085	-0.0161533	-0.0123944	0.00849042	0.0320885	-0.0147395	0.0111921	-0.000721878	0.00328388	0.00959066
H0351.2002	Claustrum, Right	0.0199911	0.0219841	0.00106022	0.000550649	0.00260375	0.0238401	0.0331989	0.00844161	0.0218872	0.037397	0.00368364	0.00561666	0.003583	0.0291918	-0.0138201	0.00487066	-0.0271964	-0.0025561	0.00881217
H0351.2002	Claustrum, Left	0.0143514	0.0185976	0.0108429	-0.00166647	0.00467306	0.0204231	0.0249875	0.00225958	0.0209294	0.0177578	0.0135294	-0.00647423	-0.0108981	0.0123304	-0.00111313	-0.00227991	0.0120829	0.0112069	0.00242283
H0351.2002	Septal nuclei, Left	0.0162699	-0.00624748	0.000163477	-0.00946024	0.0234001	0.028762	0.0211821	0.0422726	0.0154423	0.0283525	0.00137528	0.0262581	-0.0132425	0.0142111	-0.0489551	-0.00605706	0.00316698	0.00124293	0.0289683
H0351.2002	CA1 field, Right	-0.00268898	0.0181448	0.0145404	0.0207123	0.0128833	-0.0128996	-0.0163047	-0.00789279	0.028763	-0.0153407	0.00491261	0.0215597	0.0609542	0.0233063	0.0129025	-0.00148027	0.0223218	0.0114731	0.0146406
H0351.2002	CA2 field, Right	0.0122208	0.015551	0.0273009	0.0130241	-0.00263959	-0.0077995	-0.0122441	-0.0203281	0.0397211	-0.00944994	0.0206961	-0.029912	-0.00748146	-0.0157764	0.0372286	0.0214175	0.0334254	-0.00659252	0.0109373
H0351.2002	CA3 field, Right	0.0119245	0.0252857	0.0267036	0.0150074	0.00179833	-0.00682355	-0.0177323	-0.0118998	0.0321002	-0.00891779	0.0181483	-0.0016444	0.0124222	0.00669089	0.0368778	-0.00923782	0.0215787	-0.00953947	0.0103286
H0351.2002	CA4 field, Right	0.0125332	0.0236146	0.0197896	0.0153366	-0.00854057	-0.0159215	-0.019435	-0.0123284	0.0346936	-0.0036308	0.0176351	-0.007675	0.0035644	0.000865379	0.0394423	0.00383971	0.0153129	-0.00421595	0.01996
H0351.2002	Dentate gyrus, Right	0.00383706	0.0143273	0.022757	0.0255716	-0.00753538	0.0128713	-0.0232549	-0.021375	0.0371862	0.0306388	0.0325739	-0.0149478	-0.00727681	-0.0138623	-0.00825689	-0.0317176	0.0126658	-0.00740182	0.025674
H0351.2002	Body of Caudate Nucleus, Right	-0.00160824	-0.0266844	-0.00401405	0.0218064	0.0214105	0.0119089	0.011265	0.0190327	0.023629	0.0030422	0.00354602	0.0172452	0.00508437	0.0112839	0.00155662	0.00541376	0.0148313	0.0242931	-0.00564531
H0351.2002	subiculum, Left	0.0156777	0.0316702	-0.00841674	0.0179041	-0.00792802	-0.0179358	-0.0087994	-0.0080865	0.0303708	-0.00102167	-0.0288432	0.0260139	0.0692784	0.0456675	0.0308777	0.046455	-0.00112883	0.0229157	0.0425397
H0351.2002	CA1 field, Left	0.0198039	0.0366107	0.0114635	0.0318467	-0.00205475	0.0117407	-0.00996496	-0.0038402	0.0206933	0.0252803	-0.0123522	0.00139821	0.00917269	0.0358805	-0.0095255	0.00375819	-0.018879	0.00298829	0.0330921
H0351.2002	CA2 field, Left	0.023928	0.0276252	0.0218588	0.0181889	-0.00629209	0.00792719	-0.00712821	-0.0108243	0.015081	0.00548328	0.00198202	-0.0243814	-0.0238938	-0.00145621	0.02393	0.0145172	0.0357496	0.0227348	0.00781812
H0351.2002	CA3 field, Left	0.0215565	0.0254122	0.0129	0.0166752	-0.00724299	-0.00577826	-0.0146085	-0.00426792	0.0348597	0.00381947	-0.00271659	-0.0251177	-0.00653464	-0.00381573	0.0507063	0.0618842	0.0242883	0.0127761	0.0300937
H0351.2002	CA4 field, Left	0.0291209	0.0228847	0.0279099	0.0210793	-0.0050515	0.0241642	-0.014951	-0.000522251	0.0153537	0.019432	0.00745077	-0.0359785	-0.0295696	-0.0135012	-0.00715349	0.0191337	0.0284978	0.00180331	0.0077729
H0351.2002	Dentate gyrus, Left	0.0134013	0.0171189	0.0105269	0.0226733	-0.0124145	0.0174664	-0.0186742	-0.0102989	0.0188097	0.0366801	0.0109945	-0.0131681	-0.0209978	-0.0108299	-0.0133114	0.0210569	0.00925459	0.0137229	0.0198027
H0351.2002	Body of Caudate Nucleus, Left	0.00350811	-0.0256473	-0.0197913	0.019954	0.0110002	-0.00409009	0.00873499	0.017613	0.0265854	0.00693734	-0.0181131	0.0134497	0.00937717	0.00572232	0.0600658	0.0771748	0.0259848	0.0543887	0.0126165
H0351.2002	Head of Caudate Nucleus, Right	-0.0711452	-0.0931731	-0.0255292	0.0561181	0.0529539	0.0214379	0.0351342	0.0568688	0.0259576	0.0111769	0.0156462	0.0594948	0.00907993	0.015078	0.018882	0.0202888	0.0102815	0.0260444	0.00166496
H0351.2002	precentral gyrus, Left, superior lateral aspect of gyrus	-0.00635483	-0.00547424	0.00420729	0.000856205	0.011004	0.0137135	0.0284729	0.00554364	0.0317818	-0.000586674	0.0118069	0.013769	0.00999878	0.00512585	0.0206474	0.026915	0.0288804	0.0274757	0.0104142
H0351.2002	inferior frontal gyrus, orbital part, Left	-0.00965628	-0.000519048	0.0149872	0.0171605	0.0113964	0.0239836	0.0236648	0.0221942	0.0378184	0.0209747	0.0258734	0.00975202	-0.00215513	0.00144696	-0.0399907	-0.0258026	-0.0335325	-0.0360271	0.0300906
H0351.2002	frontal pole, Left, superior aspect	-0.00898331	-0.00182967	-0.00458037	0.00126874	-0.00844267	0.0253241	0.0347584	0.0145374	0.0235096	0.0250658	0.0140392	0.00858707	-3.7413e-05	0.0143158	-0.0302541	-0.00104033	0.00239791	0.0157139	0.0112282
H0351.2002	inferior frontal gyrus, opercular part, Left	0.0117988	0.0117813	0.0197001	0.0161673	-0.000764865	0.00289686	-0.00923776	-0.000485225	0.0293846	-0.00780379	0.00258769	-0.0191454	0.00468112	-0.00488483	-0.00765226	0.00481773	0.021223	0.00916479	0.0139761
H0351.2002	Cingulate gyrus, frontal part, Right, superior bank of gyrus	-0.0220797	-0.00305215	0.0165378	0.0264314	0.00896042	0.00176574	-0.000349825	0.0293246	0.0354201	0.000802424	0.0112197	0.00177415	-0.0144577	-0.00887192	-0.025595	0.00161792	0.00720164	-0.00888247	0.0222447
H0351.2002	Cingulate gyrus, retrosplenial part, Left, inferior bank of gyrus	0.0166411	0.016373	0.00399133	0.00534535	0.0033428	-0.00945362	-0.00286224	-0.00306417	0.022837	-0.00114281	0.00276848	0.0121695	0.0116949	0.016208	0.0402993	0.033869	0.0290962	0.0304029	0.00221248
H0351.2002	middle temporal gyrus, Left, inferior bank of gyrus	0.00958413	-2.51615e-05	0.0172008	0.0067263	0.0112646	0.0138667	0.00993939	0.00528784	0.0374091	0.0130993	0.020759	-0.00711414	-0.00372412	-0.00785704	-0.0197164	-0.00178914	-0.00403372	-0.00950121	0.0173347
H0351.2002	Putamen, Left	-0.0593914	-0.0827805	-0.0284111	0.0566149	0.0418423	0.00818484	0.0310625	0.0517635	0.0257143	0.0113588	0.013491	0.0566456	0.00124361	0.0249739	0.0294513	0.0225458	0.0106426	0.0210031	-0.000738742
H0351.2002	middle temporal gyrus, Left, superior bank of gyrus	0.000369496	0.00896398	0.0268599	0.0256815	0.0154044	0.0108203	0.000296589	0.0194412	0.0361612	0.00909034	0.0237317	-0.00967052	-0.00818623	-0.00470098	-0.0325238	-0.0226847	-0.0363905	-0.0485223	0.0244269
H0351.2002	Putamen, Left	-0.0584652	-0.09697	-0.0249463	0.0437894	0.0348749	0.0389535	0.0473455	0.0544036	0.0294904	0.0132852	0.0163796	0.0380887	-0.00867738	0.00510081	0.0115526	0.00371382	0.0121271	0.0180028	0.000275459
H0351.2002	globus pallidus, external segment, Left	-0.030024	-0.0884787	-0.031487	-0.0667023	0.0770172	0.0730248	0.0962556	0.0713334	0.0261859	0.0327823	0.0344374	0.0694794	0.0177285	0.0311333	0.0336874	0.0239567	0.018639	0.0423373	0.011111
H0351.2002	globus pallidus, internal segment, Left	-0.0122239	-0.0776494	-0.028307	-0.0805571	0.0766092	0.063596	0.0890089	0.0905264	0.0237356	0.0294961	0.0253946	0.0601221	0.0183831	0.0426348	0.00317792	0.0120617	0.017234	0.0369408	0.0205926
H0351.2002	supraparietal lobule, Left, inferior bank of gyrus	0.0150804	0.0180549	0.0113505	0.0106261	0.0156068	0.0204472	0.0217942	0.00951939	0.0225615	0.0242476	0.0110887	0.0109097	0.00137193	0.0249991	-0.0201042	-0.0225456	-0.0322937	-0.0208307	0.0136206
H0351.2002	angular gyrus, Left, inferior bank of gyrus	0.00782427	0.0186807	0.0137555	0.0222238	-0.000173744	-0.00960361	-0.0150312	0.00314997	0.0239097	-0.00199591	0.00305055	0.00010373	0.0114222	0.00738297	0.0198415	0.0159889	0.020612	0.0137127	0.0114739
H0351.2002	inferior temporal gyrus, Left, bank of the its	-0.0038811	0.0113536	0.0224871	0.028398	0.00780845	0.0103192	-0.00359948	0.0161122	0.0303489	0.000294147	0.0136367	-0.0021758	-0.00925593	-0.00032818	-0.0266945	-0.0330853	-0.0272706	-0.0304712	0.0229683
H0351.2002	fusiform gyrus, Left, bank of the its	-0.0222112	0.00817234	0.00191518	0.0269948	0.00109704	-0.00208148	0.00353073	0.0129061	0.013132	-0.0123404	-0.011831	0.0204384	0.0101899	0.0248348	0.00791243	0.0124556	0.0183016	0.0218598	0.0167989
H0351.2002	fusiform gyrus, Left, lateral bank of gyrus	-0.0226091	0.0132718	-0.00436997	0.0277653	0.00175856	-0.017305	-0.00428937	0.0116056	0.0197721	-0.0115832	-0.00764522	0.0199047	0.0337931	0.0357915	0.0245554	0.0344529	0.0224361	0.03226	0.014055
H0351.2002	fusiform gyrus, Right, bank of cos	-0.0240803	0.00358631	0.0053767	0.0262011	0.00602763	-0.00916327	0.00267264	0.0179913	0.0282256	-0.00460455	0.00487049	0.0150354	0.021964	0.0137986	0.0227846	0.0199915	0.023481	0.0167115	0.0134999
H0351.2002	parahippocampal gyrus, Right, lateral bank of gyrus	-0.0294042	-0.0214705	0.00455277	0.014937	0.0205101	0.0226197	0.0307618	0.0237282	0.0202902	-0.0019323	-0.000952191	0.0167264	0.0268001	0.00100405	0.0311609	0.0200726	0.0267858	0.0149811	0.0105096
H0351.2002	middle temporal gyrus, Left, inferior bank of gyrus	-0.0171988	0.00277115	0.00106197	0.0119252	0.0248621	0.00282907	0.0257326	0.0167855	0.0246372	0.0044516	0.014283	0.0498016	0.0145718	0.0260005	0.0325696	0.0314851	0.0183545	0.0106885	0.0120853
H0351.2002	inferior temporal gyrus, Left, bank of the its	0.00736275	0.0192063	0.0251704	0.0300417	0.0139385	0.00664835	-0.0177856	0.0236612	0.0321704	0.0136157	0.0195655	-0.00997765	-0.0113628	0.0087525	-0.0489079	-0.0285767	-0.050506	-0.0561323	0.0269604
H0351.2002	inferior temporal gyrus, Left, bank of mts	-0.016795	-0.00760622	0.0106446	0.0147341	0.0202118	0.0132071	0.020344	0.0188409	0.0328646	0.000724877	0.0193482	0.0165927	0.0109059	0.00323968	-0.0033254	0.00382135	0.0182062	0.00524137	0.0151473
H0351.2002	fusiform gyrus, Left, bank of the its	-0.00946219	-0.00777056	0.014065	0.00599864	0.0205382	0.035186	0.0339681	0.0202551	0.0320043	0.0171981	0.0284348	0.00394538	-0.0143464	0.000854743	-0.0490153	-0.0317555	-0.046187	-0.0523131	0.0137926
H0351.2002	precuneus, Right, superior lateral bank of gyrus	0.0153365	0.0146466	0.0199434	0.0139886	0.00590894	0.00893361	-0.00268016	0.00497938	0.0364128	0.00898015	0.0176951	-0.0123136	-0.0035733	0.00259182	-0.0215146	-0.0186817	-0.0227975	-0.0299705	0.0179958
H0351.2002	inferior temporal gyrus, Right, bank of the its	-0.00308742	0.00339106	0.0293241	0.025685	0.000795083	0.0045504	-0.015491	0.00767977	0.0373111	-0.000545841	0.0205926	-0.0314377	-0.0138457	-0.0215881	-0.0367674	-0.0179594	-0.0118484	-0.0345536	0.0150941
H0351.2002	fusiform gyrus, Right, bank of the its	-0.00503183	0.00830317	0.0114844	0.0207101	0.00498896	0.00983528	0.00608192	0.0205007	0.0301289	0.0120199	0.00862214	-0.00468648	-0.00983053	0.00400926	-0.0378373	-0.0145706	0.00897847	-0.00746971	0.025802
H0351.2002	superior temporal gyrus, Left, inferior bank of gyrus	0.0148399	0.0160257	0.0181073	0.0153463	0.0121795	0.0188682	0.0120108	0.00740082	0.0312037	0.0179221	0.0192771	-0.00317589	-0.00891341	0.00827559	-0.0359377	-0.0204781	-0.0372644	-0.0342879	0.0156522
H0351.2002	middle temporal gyrus, Left, superior bank of gyrus	0.00884015	0.0163522	0.021676	0.0233118	0.00640093	0.0101846	-0.00330746	0.00807231	0.0281938	0.00766352	0.0132294	-0.00778408	-0.00254875	0.00169513	-0.0235622	-0.0195701	-0.0306954	-0.030703	0.0112748
H0351.2002	superior temporal gyrus, Left, inferior bank of gyrus	0.009188	0.00895513	0.00885412	0.013655	-0.000547331	-0.0106151	-0.0131845	-0.00248355	0.0325378	-0.00108346	0.00687356	-1.49049e-05	0.00784185	-0.00379024	0.0230821	0.0294286	0.0295059	0.026334	0.0101074
H0351.2002	superior occipital gyrus, Left, superior bank of gyrus	0.0255473	0.0247832	0.0102723	0.00958928	-0.00345599	-0.00376172	-0.0155671	-0.00847979	0.028081	0.0136473	0.00951215	-0.00453853	0.00570121	0.00985808	0.0111481	0.00924177	0.0205608	0.0154351	0.00527419
H0351.2002	superior occipital gyrus, Left, inferior bank of gyrus	0.0313613	0.026584	0.0077147	0.00608938	-0.00506584	-0.00936372	-0.0127382	-0.0109808	0.0285723	0.0152059	0.0130154	-0.00598544	0.0115472	0.0105573	0.0186865	0.0157553	0.0185725	0.0167298	0.0183838
H0351.2002	middle temporal gyrus, Right, superior bank of gyrus	0.00111698	-0.000565625	0.0259567	0.0259314	0.00814391	0.000136047	-0.0151745	0.00713418	0.0353566	0.000746257	0.015474	-0.0225691	0.00037488	-0.0252153	0.0315814	0.00979903	0.0282733	-0.000787039	0.0229124
H0351.2002	transverse gyri, Right	0.0129792	0.00808273	0.00281992	0.00588554	0.00414234	0.00194405	0.0100409	0.00654362	0.030774	0.0077034	0.0140208	0.00254645	0.0111272	0.00511911	0.0190737	0.0216415	0.0262214	0.0184614	0.0156486
H0351.2002	superior temporal gyrus, Right, inferior bank of gyrus	0.00726451	-0.00306049	0.0118987	0.0083193	0.0158826	0.0371115	0.0311653	0.0160059	0.021392	0.0234215	0.00632702	0.000624533	0.00523188	-0.00124458	-0.00107174	-0.00671615	0.0193784	0.00581345	0.0155701
H0351.2002	post central gyrus, Left, bank of the posterior central sulcus	0.00369145	0.00670612	0.00889117	0.0134418	-0.00270832	0.000565219	-0.00423829	0.0100872	0.0295145	0.000807492	0.00955832	-0.0110978	0.00359512	-0.00364286	0.00594098	0.0144686	0.0278055	0.0135305	0.00647961
H0351.2002	supramarginal gyrus, Left, superior bank of gyrus	0.00990881	0.0132509	0.0167813	0.0205372	0.0077526	0.00556079	-0.000826761	-0.00102007	0.0297914	0.00280712	0.00655463	-0.000573917	0.0411347	0.00515071	-0.0020111	0.0103505	0.00980625	0.00331192	0.0237388
H0351.2002	superior temporal gyrus, Left, lateral bank of gyrus	0.00359707	0.0191976	0.00348278	0.0193869	0.00206903	-0.013823	-0.00633583	0.00342193	0.0229392	-0.000918498	-0.000116205	0.00849504	0.0302858	0.0213457	0.0247634	0.0260594	0.0250182	0.0279394	0.0142412
H0351.2002	cuneus, Right, peristriate	0.0311447	0.0147927	0.0131232	0.00204064	0.00115894	0.00654826	-0.000927138	-0.00917086	0.0354453	0.0249775	0.0278345	-0.0157779	-0.00443288	-0.0011633	-0.00183518	0.00453147	-0.00201904	-0.003508	0.00782049
H0351.2002	cuneus, Right, striate	0.0324196	0.0146545	0.0102677	-0.00495359	0.000964996	0.0148415	0.00556983	-0.013856	0.0377017	0.026954	0.0216226	-0.0183191	0.00194049	-0.0053953	0.00194536	-0.00293573	0.0201143	0.00893223	0.0234439
H0351.2002	lingual gyrus, Right, peristriate	0.0331099	0.0292174	0.0136705	0.00590073	-1.059e-05	0.0130268	-0.00260786	-0.00604535	0.0271785	0.0314459	0.0119129	-0.00984307	-0.00664125	0.0116979	-0.0497888	-0.0131695	-0.0123352	-0.00580375	0.015995
H0351.2002	precentral gyrus, Left, bank of the central sulcus	0.032743	0.00702502	0.0191859	0.000769915	0.0094405	0.00564945	0.00892201	-0.00370323	0.0321173	-0.00373308	0.0125987	-0.00755196	0.0111693	-0.006938	0.0363564	0.0212645	0.0346273	0.011578	0.00329248
H0351.2002	post central gyrus, Left, superior lateral aspect of gyrus	0.0295863	0.0213424	0.00918078	0.00177809	-0.00144896	0.0107058	0.0100871	-0.00982055	0.0197276	0.00355634	0.000492111	-0.00702726	-0.00705223	0.0155417	-0.00321586	0.00290295	0.0235834	0.0172164	0.0228581
H0351.2002	post central gyrus, Left, inferior lateral aspect of gyrus	-0.00288729	-0.0132083	0.00230122	-0.0151102	0.0114241	0.0332854	0.0462148	0.00206541	0.0333387	0.0171835	0.0195561	0.00733443	0.00387334	-0.00577002	0.0173058	0.015542	0.0234503	0.0189378	0.00128325
H0351.2002	cuneus, Left, peristriate	0.0292653	0.0123388	0.00611684	-0.00827667	-0.0020612	0.00625668	0.00604402	-0.00860396	0.0374999	0.0212611	0.019164	-0.00918825	0.00213651	-0.00275712	0.0120131	0.00968343	0.0280753	0.0242153	0.0289358
H0351.2002	lingual gyrus, Left, striate	0.0408578	0.017525	0.0131446	-0.00290154	0.00236867	0.00545158	-0.00878533	-0.0140573	0.0298251	0.027907	0.0161596	0.000442884	-0.00203861	-0.00730785	0.0368937	0.0165382	0.0266865	0.0147372	0.0237711
H0351.2002	inferior occipital gyrus, Left, superior bank of gyrus	0.0350443	0.0171976	0.0184697	0.00525927	-0.00825106	0.0277984	-0.00402314	-0.0110327	0.0337681	0.0303023	0.0187385	-0.0394453	-0.0126739	-0.00883168	-0.0417089	-0.0314178	-0.0278885	-0.0309283	0.0229349
H0351.2002	inferior occipital gyrus, Left, inferior bank of gyrus	0.0426118	0.0397536	0.00793847	0.00946005	-0.00777842	-0.00641952	-0.029605	-0.0239799	0.0202486	0.018356	0.000519772	-0.00670808	0.022335	0.0284575	-0.00446873	0.00544968	0.023149	0.0255797	0.0229595
H0351.2002	paracentral lobule, anterior part, Left, inferior bank of gyrus	0.0194851	0.0135962	0.0179652	0.0132378	-0.000737866	-0.00173326	-0.00623247	-0.00507552	0.0303666	-0.00804072	0.00626768	-0.00617245	-0.00912351	-0.00458921	0.00942978	0.00925729	0.0235064	0.00906977	0.0163022
H0351.2002	paracentral lobule, anterior part, Right, inferior bank of gyrus	-0.000855643	0.0121918	0.0170437	0.026	0.0116308	-0.00178543	-0.0144099	0.0204346	0.0299171	-0.00335897	0.00778193	-0.00342731	0.0105914	0.00871653	-0.000480615	-0.0014751	0.00366177	-0.00889809	0.0232255
H0351.2002	Cingulate gyrus, frontal part, Right, superior bank of gyrus	-0.00155912	0.0121752	0.0106009	0.0188718	-0.00212319	-0.0264992	-0.0278478	0.00213735	0.0230024	-0.0289225	-0.00904541	-0.00919841	0.0233428	0.00679219	0.0352094	0.0484007	0.0500705	0.0400056	0.0175357
H0351.2002	Cingulate gyrus, frontal part, Right, inferior bank of gyrus	0.0243079	0.0128924	0.020197	0.0130016	0.00677915	-0.00449256	-0.0141677	-0.00378524	0.0392298	0.00486626	0.0197334	-0.0132399	-0.0048838	0.00147549	-0.0132577	-0.00282781	-0.00653029	-0.0109004	0.019823
H0351.2002	supraparietal lobule, Right, superior bank of gyrus	0.020776	0.00286543	0.0173116	-0.000892852	0.0145574	0.0328086	0.0242027	-0.00218153	0.0280581	0.0287194	0.017374	-0.00947608	-0.0111924	-0.0111438	0.00781187	-0.00829434	-0.00407775	-0.0131892	-0.00408182
H0351.2002	supraparietal lobule, Right, inferior bank of gyrus	0.0158916	0.00394052	0.0152194	0.00548103	-0.00211286	0.0161986	0.00938841	0.0066072	0.0377592	0.020443	0.0210863	-0.026036	-0.00891795	-0.0165116	-0.00733412	-0.0127362	-0.0101163	-0.0131604	0.0301961
H0351.2002	post central gyrus, Right, bank of the central sulcus	0.0282394	0.0114187	0.00886815	-0.000881675	0.0129613	0.00337142	0.0118172	0.001475	0.031463	0.0163418	0.0156646	0.00584802	0.0221538	0.0044877	0.0200972	0.0203042	0.0239084	0.0184402	0.0145107
H0351.2002	post central gyrus, Right, bank of the posterior central sulcus	0.0136058	0.0091829	0.000115213	-0.00149849	0.00771829	0.00594583	0.0190005	-0.00114277	0.0258096	0.00506827	0.0112513	0.0139526	0.0201871	0.0126779	0.0236719	0.0273592	0.0257709	0.0308294	0.00606803
H0351.2002	supramarginal gyrus, Right, superior bank of gyrus	0.0166098	0.0138483	0.0244357	0.0191628	0.00181006	-0.00213137	-0.0173211	-0.006888	0.0383477	0.0048375	0.0211756	-0.0220462	-0.00710276	-0.0126339	-0.00697218	1.7817e-05	-0.000177652	-0.0137409	0.0106136
H0351.2002	supramarginal gyrus, Right, inferior bank of gyrus	0.010799	0.014506	0.0138327	0.0157936	0.00395371	0.000623866	-0.0117866	0.00267043	0.0298246	0.00789421	0.00946471	0.00454104	-0.00564436	0.0015205	0.0189034	0.0100234	0.0231678	0.015546	0.0119372
H0351.2002	supramarginal gyrus, Right, inferior bank of gyrus	-0.00601243	-0.0125315	0.0050159	0.00281411	0.00305501	0.00442953	0.0124695	0.00316096	0.0339132	-0.00127332	0.0160457	-0.00803699	0.021108	-0.0199667	0.0470868	0.0377902	0.0467502	0.0357454	0.0104241
H0351.2002	supraparietal lobule, Left, inferior bank of gyrus	0.0203512	0.0192906	0.0115734	0.0052037	0.0161969	0.0202212	0.0222999	0.00735121	0.0292436	0.0283017	0.0241376	0.00452425	0.00311902	0.0206166	-0.0327205	-0.0218108	-0.0435922	-0.0382945	0.0144776
H0351.2002	precuneus, Left, , inferior lateral bank of gyrus	0.0245297	0.0215113	0.0139294	0.00894796	0.0028549	-0.00472195	-0.0144972	-0.00838734	0.0315	0.00931917	0.0128452	-0.00478837	0.000374857	0.00426982	0.0104931	0.00946234	0.0226022	0.013976	0.0219815
H0351.2002	superior occipital gyrus, Right, superior bank of gyrus	0.0240507	0.0419735	0.00303681	0.016955	-0.00638981	-0.0251305	-0.0244919	-0.0145761	0.00875889	-0.0108223	-0.0155866	0.0184399	0.0626072	0.0438564	0.0255907	0.0267123	0.0174471	0.0315356	0.0183883
H0351.2002	lingual gyrus, Right, peristriate	0.0203497	0.00267503	0.0179286	-0.0036801	0.00550316	0.0419679	0.0275951	-0.00489119	0.0353252	0.0269989	0.0253226	-0.024511	-0.0135967	-0.0138198	-0.0342227	-0.0353451	-0.0279857	-0.0334503	0.0192367
H0351.2002	occipito-temporal gyrus, Right, inferior bank of gyrus	0.0160555	0.00551836	0.0224199	0.00727319	0.026956	0.0417293	0.0303448	0.012951	0.0314572	0.0392576	0.0309122	-0.00641279	-0.0141415	-0.00627159	-0.0299089	-0.0380412	-0.0332229	-0.0422051	0.00481153
H0351.2002	inferior occipital gyrus, Right, inferior bank of gyrus	0.00631218	0.00506195	-0.000702846	0.0022796	0.0051112	0.0133721	0.02098	0.0104088	0.0324713	0.0212971	0.0145018	0.00587731	0.0119642	0.00760366	-0.00615884	0.0176952	0.0197521	0.0171278	0.0203297
H0351.2002	inferior occipital gyrus, Right, inferior bank of gyrus	-0.00309668	-0.0186076	0.00463582	-0.0083414	0.0172949	0.0377577	0.0408089	0.0167444	0.0314566	0.0279326	0.0234247	-0.000189302	-0.00323856	-0.012798	-0.00458725	-0.00697526	0.0175368	0.00752477	0.00410173
H0351.2002	cuneus, Left, peristriate	0.0418271	0.0292483	0.00723718	-0.00120816	-0.00258493	-0.00797594	-0.0268319	-0.0265977	0.0335563	0.0324537	0.0184615	-0.00122699	0.00996546	0.00932487	0.0172832	0.0194931	0.02773	0.0294607	0.0200578
H0351.2002	cuneus, Left, striate	0.0371638	0.0214325	0.00823766	-0.00480986	-7.82046e-05	0.00323819	-0.0134741	-0.0113315	0.0325628	0.0300861	0.0157847	-0.0032617	9.34473e-05	0.000341236	0.0138167	0.00918246	0.0166225	0.018642	0.0228651
H0351.2002	cuneus, Right, striate	0.0386816	0.0303071	0.00185055	-0.00613667	0.0092108	0.00129012	-0.00495938	-0.0174289	0.0273476	0.0412308	0.0144766	0.0185017	0.021586	0.0262028	0.0114178	0.0181479	0.00637935	0.0193515	0.0238597
H0351.2002	lingual gyrus, Left, peristriate	0.0294767	0.0381612	-0.0114766	-0.0075488	-0.00613913	0.00232438	0.0146347	-0.0108101	0.00882261	0.00825454	-0.0121628	0.0452081	0.00498386	0.0526966	0.011749	0.0174429	0.0121503	0.0422213	0.0139962
H0351.2002	lingual gyrus, Left, striate	0.0420618	0.0300319	0.0103772	-0.00229457	-0.00386068	0.0109875	-0.0166315	-0.00127082	0.026628	0.037894	0.0123796	6.90171e-05	-0.0113558	0.000326196	-0.0312353	-0.0115989	-0.000415996	-0.00263475	0.030085
H0351.2002	lingual gyrus, Right, striate	0.0368409	0.0331436	-0.00664531	-0.00883213	-5.69734e-05	-0.0100189	-0.0109674	-0.0141277	0.0182449	0.01779	0.00236306	0.0360567	0.0148489	0.0357976	0.0438435	0.0343075	0.0253289	0.0471763	0.0278598
H0351.2002	inferior rostral gyrus, Right	0.0179014	0.0173447	0.0202626	0.0197534	-0.000836712	-0.00776442	-0.0336831	0.0152786	0.0272035	0.0140957	0.00953885	-0.0106111	0.000294026	-0.0139861	0.00561211	0.00193168	-9.85142e-05	-0.0142484	0.0227052
H0351.2002	inferior frontal gyrus, orbital part, Left	0.00576321	0.0241393	-0.00227592	0.0178044	-0.0190114	0.0096591	0.0150623	0.0113309	0.00434101	0.0196459	-0.00532561	0.00633809	-0.00773774	0.0242273	0.0105894	0.0181191	-0.0121302	0.00830928	0.0175551
H0351.2002	inferior temporal gyrus, Right, bank of the its	0.00447957	0.019483	0.00638684	0.0138346	-0.0110654	-0.0129099	-0.00915347	-0.00849924	0.0266607	-0.00359814	0.00372015	-0.00986828	0.00574655	0.0100593	0.0237481	0.0265958	0.0324983	0.0320862	0.0136722
H0351.2002	angular gyrus, Left, superior bank of gyrus	0.0305622	0.0318909	0.0169885	0.0144657	-0.0088382	-0.0218048	-0.0365609	-0.0249641	0.0262951	0.000406616	0.00136452	-0.0140291	0.00318873	0.00264856	0.0362911	0.0276018	0.0402373	0.0316969	0.0200478
H0351.2002	parahippocampal gyrus, Left, lateral bank of gyrus	-0.0262564	-0.0121521	-0.00316564	0.00622944	0.0293836	0.026879	0.0411826	0.0318623	0.0297297	0.0132523	0.0192283	0.0331272	0.0371775	0.0293483	-0.00108008	0.00194759	0.00204573	0.00488351	0.0215783
H0351.2002	parahippocampal gyrus, Left, bank of the cos	-0.02607	-0.00474361	0.0174131	0.0332076	0.021944	-0.00278287	-0.00931641	0.0216247	0.0271195	-0.00856026	0.00142772	0.0051018	0.033069	-0.00373254	0.0310029	0.0200203	0.0308294	0.00728812	0.011729
H0351.2002	superior temporal gyrus, Right, inferior bank of gyrus	0.00880658	0.011408	-0.000147052	0.00119752	0.0114333	0.0113624	0.0265866	0.0118199	0.0280383	0.0217556	0.0160009	0.0229681	0.00180751	0.0182667	0.0160819	0.00866733	-0.00542472	0.0105236	0.00420625
H0351.2002	inferior occipital gyrus, Right, superior bank of gyrus	0.0323972	0.0258775	0.0183525	0.00759997	0.00273233	-0.00273519	-0.0179787	-0.0112693	0.0277798	0.0126985	0.00902506	-0.0101143	0.000346465	-0.00429254	0.0211541	0.0140859	0.0395742	0.0354328	0.0205007
H0351.2002	superior occipital gyrus, Right, inferior bank of gyrus	0.0364338	0.033458	0.0189561	0.00900923	0.00582235	-0.0100971	-0.0216199	-0.00427411	0.027986	0.0148233	0.0149739	0.00359949	0.00685508	0.00878964	0.0108091	0.00151622	-0.000857469	-0.0236271	0.0148399
H0351.2002	supramarginal gyrus, Left, inferior bank of gyrus	0.0178459	0.023246	0.0271451	0.0210502	-0.00033004	-0.00295888	-0.0233309	-0.0129755	0.0288604	-0.00160304	0.0029733	-0.0119181	-0.00610533	-0.00804207	0.00941016	-0.00927034	0.00838191	-0.008169	0.0172303
H0351.2002	lingual gyrus, Right, striate	0.0473893	0.0325665	0.0173288	-0.00203349	-0.00719781	0.00273421	-0.0338299	-0.0230093	0.0341198	0.0317863	0.0165429	-0.0167333	-0.00437112	-0.00613434	-0.0060362	-0.0214858	0.00148936	-0.00320913	0.0302541
H0351.2002	inferior occipital gyrus, Right, inferior bank of gyrus	0.0336042	0.0191014	0.0096176	-0.00427975	0.00384355	0.0164702	0.00798332	-0.00652978	0.0316364	0.030634	0.0177187	-0.00877543	-0.00483357	-0.00332574	-0.0151227	-0.00411806	0.0153025	0.0157337	0.020017
H0351.2002	post central gyrus, Left, bank of the central sulcus	0.0295279	0.0106934	0.012542	-0.00793858	0.012685	0.0261368	0.0218821	-0.00276765	0.0325666	0.0216088	0.0198537	-0.00704084	0.00176413	-0.00352372	0.00140565	0.00667556	0.0261308	0.0127747	0.0159425
H0351.2002	paracentral lobule, anterior part, Left, superior bank of gyrus	0.0260675	0.0204741	0.0204365	0.00480182	0.0148187	0.00967563	0.0110552	-0.0044657	0.0264526	-0.0025002	0.00913197	0.00515589	0.0160154	0.012543	0.00398634	0.0145618	0.00136273	-0.0160795	0.00889336
H0351.2002	paracentral lobule, anterior part, Right, superior bank of gyrus	0.0354619	0.0224993	0.0193603	0.00634352	0.00773606	0.00143487	-0.0100367	-0.00221872	0.0275461	0.00787081	0.00551265	-0.0168539	0.00873888	5.18318e-05	0.0197359	0.0176953	0.0308206	0.0157962	0.0184596
H0351.2002	Cingulate gyrus, frontal part, Left, superior bank of gyrus	0.00302039	0.0200554	0.0168676	0.0192513	0.000772856	-0.00274895	-0.0101815	0.00870135	0.0281093	-0.00913024	0.00460084	-0.00167992	0.0104239	0.0113522	-0.0313705	-0.0211289	-0.00786115	-0.0199179	0.0205686
H0351.2002	angular gyrus, Right, superior bank of gyrus	0.0199844	0.0159793	0.0231976	0.0112661	-0.0152687	0.00515591	-0.0178944	-0.00761059	0.0398952	0.000106657	0.0232226	-0.0489	-0.0187935	-0.0200452	-0.0512727	-0.0210198	0.0285512	0.00127593	0.0213047
H0351.2002	precentral gyrus, Right, bank of the central sulcus	0.0394594	0.029193	0.0168669	0.00202736	0.0125608	-0.00168555	0.00133304	-0.0151807	0.0304861	0.0154076	0.0171802	0.000261431	0.0189096	0.0149489	0.0157042	0.0124174	-0.00262941	-0.0237306	0.0122248
H0351.2002	supraparietal lobule, Left, superior bank of gyrus	0.0144298	0.0147538	0.00927038	0.00331745	-0.00357053	0.0122769	0.010097	-0.00616718	0.0343606	0.0120299	0.0261771	-0.0240153	-0.00673919	0.00605918	-0.0317374	-0.00361477	0.0255215	0.0266242	0.0123055
H0351.2002	superior occipital gyrus, Left, superior bank of gyrus	0.0103813	0.0207322	0.00923697	0.00774758	-0.00184828	0.0205922	0.0117558	-0.00834458	0.0169357	-0.00172791	-0.00351338	-0.0013508	-0.0112798	0.0179281	-0.0302172	0.00534797	0.0277463	0.0240979	0.0209889
H0351.2002	angular gyrus, Right, inferior bank of gyrus	0.0149429	0.0170201	0.00937336	0.00830998	-0.000708832	0.00774014	0.00269144	0.00636746	0.0261059	0.0204568	0.0110674	-0.00662365	0.0073518	0.00826688	-0.0128921	-0.00609273	-0.00540961	0.00931113	0.0108068
H0351.2002	angular gyrus, Right, inferior bank of gyrus	0.0125676	0.0145887	0.0107284	0.00661927	0.0054376	-0.00765389	0.000297605	0.00472629	0.0314622	0.00630589	0.0218999	-0.00224082	0.00509312	0.00147932	-0.000707017	0.00676609	0.0223232	0.0241843	0.00381691
H0351.2002	Heschel's gyrus, Left	0.0276786	0.0180386	0.0109513	-8.71253e-05	0.000144602	0.0156812	0.00573638	-0.0135654	0.0360092	0.0330061	0.019761	-0.0138528	-0.0070605	-0.000946846	-0.0218569	-0.0216134	-0.00627577	-0.000478727	0.0267915
H0351.2002	Long Insular Gyri, Left	0.00857817	0.0202135	0.00570141	0.013489	-0.00588602	-0.00567615	-0.00783914	-0.00869105	0.0290312	0.00783138	0.00505151	-0.00277404	0.0063808	0.0143389	0.0047292	0.0160862	-0.00609594	0.00525391	0.0206119
H0351.2002	Putamen, Left	-0.0464201	-0.0842579	-0.0333323	0.0246215	0.0386651	0.062279	0.0667824	0.0514779	0.022547	0.0304294	0.0170609	0.0537699	-0.00740534	0.0308369	-0.0227648	0.000964195	0.00286024	0.0385782	0.0126278
H0351.2002	planum polare, Right	0.0161922	0.0142009	0.0021209	-0.00122254	-0.0086558	0.0197865	0.0122527	-0.0112727	0.0329781	0.0213695	0.0175904	-0.0114671	-0.0103913	0.00999055	-0.0152466	-0.00498865	0.0223765	0.0400034	0.0226613
H0351.2002	Long Insular Gyri, Right	0.00749715	0.0163858	0.0150932	0.018871	0.00729444	-0.00794212	-0.0108031	0.00169568	0.0338322	0.0110582	0.0128899	-0.00355163	0.00622517	0.00268489	0.00226262	0.0128943	-0.00172368	-0.0136063	0.0228616
H0351.2002	Body of Caudate Nucleus, Right	-0.039624	-0.0741022	-0.0268904	0.0410822	0.0454081	0.0289013	0.0413047	0.0517069	0.027841	0.0166018	0.0115433	0.0514527	0.0239259	0.0268725	-0.00787438	0.019196	-0.0197482	0.016938	0.00368092
H0351.2002	Putamen, Right	-0.0444877	-0.0822557	-0.032302	0.0324556	0.044446	0.0290147	0.0505835	0.0525041	0.0311713	0.021046	0.0195093	0.0636869	0.0324414	0.0235194	0.0518876	0.0248361	-0.0179293	0.0234799	0.00950134
H0351.2002	inferior occipital gyrus, Left, superior bank of gyrus	0.0230952	0.0161257	0.0161224	0.00248207	-0.0207722	0.0119288	-0.0064543	-0.0185862	0.0377185	0.011367	0.0206053	-0.0429872	-0.0275733	-0.0169784	-0.0341445	-0.0135951	0.0246924	0.00978861	0.0210784
H0351.2002	inferior occipital gyrus, Left, inferior bank of gyrus	0.0239524	0.0176888	0.00382964	-0.00521002	0.000348891	-0.00552753	0.00957474	-0.0109305	0.0397772	0.022432	0.0264272	0.00581848	0.00234755	0.00827671	0.012661	0.00439355	-0.00720653	-0.00652693	0.0177489
H0351.2002	superior occipital gyrus, Left, inferior bank of gyrus	0.0270365	0.0291363	0.0126579	0.0101809	-0.000717651	-0.00174637	-0.00708439	-0.0145475	0.027146	0.0188735	0.00830756	0.00158241	-0.00219301	0.0103493	0.00669383	-0.000156754	-0.00763157	0.00603428	0.0112256
H0351.2002	inferior occipital gyrus, Left, inferior bank of gyrus	0.0274879	0.0155194	0.00368235	-0.00813186	0.0146503	0.0190159	0.022375	-0.00318189	0.0256748	0.0387145	0.0209633	0.0160112	-0.0105696	0.00544946	0.0543606	0.0292009	0.0293861	0.0494365	0.00925749
H0351.2002	Lateral group of Nuclei, Left, Ventral division	0.0473803	-0.0209262	0.0120579	-0.0505808	0.0296325	0.0432487	0.0511206	0.0280072	0.0270097	0.0121731	0.018634	0.00951247	0.013286	0.0129641	-0.0118356	0.0121443	0.00339626	-0.0087702	0.00946441
H0351.2002	Lateral group of Nuclei, Right, Ventral division	0.0404884	-0.0269214	0.00785841	-0.0526374	0.0231204	0.0381063	0.0522467	0.0237712	0.0306334	0.00840294	0.022275	0.00808312	0.00543395	0.00729363	0.017094	0.0159181	0.0355425	0.01505	0.00605045
H0351.2002	Lateral group of Nuclei, Right, Ventral division	0.0455244	-0.0292855	0.0175166	-0.051658	0.0340702	0.0284928	0.0472562	0.0246242	0.0378626	0.0156297	0.0434935	0.0046049	-0.0164469	-0.0132625	0.0637185	0.0450935	0.0420258	0.0208684	0.000364395
H0351.2002	inferior temporal gyrus, Left, bank of the its	-0.00205026	0.0130682	0.0171129	0.0247071	-0.00134543	-0.013109	-0.0256425	0.00458499	0.0317703	-0.00615871	0.00258091	-0.00693312	0.0042932	-0.00470688	0.040117	0.00598807	0.0105992	0.000721319	0.0164533
H0351.2002	fusiform gyrus, Left, bank of the its	-0.0169704	-0.00196075	0.0160616	0.0254648	0.00169653	0.00269419	-0.00411599	0.0194241	0.0401379	-0.00382692	0.0190976	-0.0102533	-0.00336837	-0.00677736	-0.0320258	-0.00770366	0.0212724	0.00157229	0.0292302
H0351.2002	fusiform gyrus, Left, lateral bank of gyrus	-0.0179533	0.00503726	0.0256895	0.0315412	0.00578116	0.00838385	-0.00861373	0.00624067	0.0320592	-0.00757306	0.00408513	-0.00620341	-0.0075325	-0.00472423	-0.0170524	-0.0237646	-0.00680092	-0.0303965	0.0232167
H0351.2002	fusiform gyrus, Left, bank of cos	-0.0239774	-0.00507495	0.0186935	0.0317695	0.0202697	0.00103476	-0.00297755	0.0244593	0.0316946	0.000560913	0.00951277	0.00737083	0.0163817	-0.00652857	0.0019702	0.0123926	-0.00314258	-0.0221905	0.0130378
H0351.2002	parahippocampal gyrus, Left, lateral bank of gyrus	-0.0289301	-0.00953684	0.00523484	0.0193285	0.0363355	0.0038069	0.0205455	0.0372295	0.0262013	-0.00456576	0.00801593	0.0411039	0.0233309	0.0146932	0.0273048	0.0116645	-0.00122793	-0.00556417	0.00800448
H0351.2002	parahippocampal gyrus, Left, bank of the cos	-0.0312813	-0.0159631	0.0112268	0.0232834	0.0198868	0.00615018	0.00595227	0.0269688	0.0338233	-0.00760878	0.00554567	0.0140613	0.0118595	-0.0139158	0.0558683	0.0179412	0.00393552	-0.0123163	0.0163102
H0351.2001	frontal pole, Left, superior aspect	-0.0464631	-0.0351717	0.0196201	0.0138523	0.032195	0.015254	0.0020848	-0.00123026	-0.0060327	-0.0253269	0.0042356	-0.00963871	-0.0307489	-0.0329827	-0.012425	-0.00176299	0.0132916	-0.0118357	-0.0188075
H0351.2001	lingual gyrus, Left, peristriate	0.0565659	0.0266373	-0.0141702	-0.0308676	-0.033459	0.0292689	0.00156722	0.010795	-0.00787562	0.0800132	0.0323172	-0.0314707	-0.0303543	-0.00284941	-0.0512731	-0.0590586	-0.0598771	-0.0350067	0.0199132
H0351.2001	angular gyrus, Left, inferior bank of gyrus	-0.0275381	0.0290504	-0.0767851	-0.00630468	0.0128433	-0.0887716	-0.0111949	0.0382431	-0.0250864	-0.0250818	-0.117371	0.0875875	0.0845248	0.118418	-0.0641552	0.0282417	-0.0640328	0.00351891	0.0110977
H0351.2001	supraparietal lobule, Right, superior bank of gyrus	0.0395767	0.0087407	0.0393651	-0.000535301	0.0295734	0.0397516	-0.00177808	-0.0194052	-0.00140788	0.0103335	0.0131257	0.00351053	-0.00525184	-0.0188702	0.000856753	-0.0200293	-0.0129205	-0.0369548	0.00424669
H0351.2001	gyrus rectus, Right	-0.0407278	-0.0312358	0.0229382	0.020181	0.0278666	0.0326094	-0.000626316	-0.0128298	-0.0198666	-0.0234137	-0.0114639	0.00373931	-0.0295297	-0.0224855	5.41395e-05	-0.00813792	0.00274323	-0.0205924	-0.024042
H0351.2001	medial orbital gyrus, Right	-0.0392677	-0.0595454	0.0486776	0.0200016	0.0528714	0.0288951	-0.0397905	0.000588112	-0.000288636	-0.0535938	0.0062246	-0.0123896	-0.0221668	-0.0804528	0.0460824	0.0437458	0.0712713	-0.00338254	-0.0181526
H0351.2001	superior frontal gyrus, Right, medial bank of gyrus	-0.0263066	-0.04577	0.032469	0.0191448	0.0278592	0.007537	-0.030078	0.00906532	0.0267967	-0.0229325	0.0433655	-0.0465245	-0.0253411	-0.0637275	-0.00352334	-0.00150434	0.027283	-0.0149468	0.00729477
H0351.2001	inferior rostral gyrus, Right	-0.0201825	-0.0246121	0.0347082	0.0227897	0.0143706	0.0241932	-0.0257827	-0.00795938	0.00224985	0.000585855	0.0173805	-0.0103718	-0.0277609	-0.0460449	0.0136721	-0.0263622	0.0119537	-0.0145768	-0.015135
H0351.2001	superior frontal gyrus, Right, lateral bank of gyrus	-0.015312	-0.0161242	0.0142958	-0.000127289	0.0178996	0.00482316	-0.0158044	-0.0241165	-0.0233622	-0.0428567	-0.0297844	0.0217359	-4.91587e-05	-0.0164563	0.0256124	0.0453896	0.0276437	0.0090934	-0.0305157
H0351.2001	middle frontal gyrus, Right, superior bank of gyrus	-0.0185427	-0.031387	0.0327192	0.0121614	0.0386909	0.0180321	0.00277218	0.00726382	0.0108947	-0.0112079	0.0319296	-0.0296382	-0.00271396	-0.0335907	-0.0246304	-0.0184718	-0.0187985	-0.0433658	-0.000567635
H0351.2001	middle frontal gyrus, Right, superior bank of gyrus	-0.0168919	-0.0224949	0.0285271	0.0125446	0.0353764	0.0159506	0.00668641	0.00720377	0.0107881	-0.00328444	0.0273642	-0.01422	-0.00919685	-0.0200809	-0.00960749	-0.0368477	-0.00979401	-0.0317155	-0.00606475
H0351.2001	middle frontal gyrus, Right, inferior bank of gyrus	-0.0439	-0.02439	-0.00922613	-0.00596938	0.0134974	-0.00619342	0.021226	-0.0330945	-0.020532	-0.039347	-0.0335157	0.00888546	0.00631973	0.0048625	0.0370607	0.0340815	0.0398173	0.0430108	-0.0125581
H0351.2001	anterior orbital gyrus, Right	-0.059114	-0.0221586	0.00420631	0.00950364	0.0279195	-0.0103834	0.0342629	-0.00868394	-0.0047585	-0.0212753	0.0152104	0.0380925	-0.00501101	0.00330248	0.0330784	0.000207057	-0.0179737	-0.0259829	-0.0302461
H0351.2001	lateral orbital gyrus, Right	-0.0355541	-0.0218277	0.0104733	-0.00315529	0.0265425	0.0178014	-0.00535379	-0.00865249	-0.0426472	-0.109213	-0.0652551	0.0406356	-0.0272585	-0.0136989	0.0110692	0.00439213	0.0247352	0.0103816	-0.0338134
H0351.2001	inferior frontal gyrus, orbital part, Left	-0.0180287	-0.0192245	0.0306102	0.0174823	-0.00901889	-0.0108392	-0.0211806	-0.0208276	0.018982	-0.0330791	0.0361028	-0.059556	-0.0258453	-0.0512427	-0.0184831	-0.0403212	-0.00204761	-0.0300056	-0.0146416
H0351.2001	lateral orbital gyrus, Left	-0.0250874	-0.0186175	0.0268	0.0246959	0.009469	-0.00282159	-0.032845	-0.00653024	-0.0101461	-0.0277388	0.0052585	-0.00257741	-0.0297935	-0.0339304	0.0476481	-0.00209184	0.0215793	-0.00732683	-0.0263185
H0351.2001	gyrus rectus, Right	-0.0288795	0.001632	0.0039598	0.0222991	-0.00102466	-0.0215192	-0.0291508	-0.0166549	-0.0266733	-0.0146084	-0.0306452	0.00271465	-0.01997	0.00874129	-0.00242501	0.00134837	0.00797585	0.0130154	-0.023465
H0351.2001	inferior rostral gyrus, Left	-0.0537464	-0.0424758	0.0176762	0.00323336	0.0133757	0.0240625	0.00667602	-0.0471314	-0.0157812	-0.0400245	-0.0207963	-0.0245622	-0.0188471	-0.0374552	0.0202507	0.0362523	0.0616003	0.0369272	-0.00870216
H0351.2001	superior frontal gyrus, Left, medial bank of gyrus	-0.0358512	-0.0389864	0.0408742	0.0226795	0.0198889	-0.00707493	-0.0293563	-0.0315546	0.0261576	-0.0319036	0.0456799	-0.043245	-0.04641	-0.0677394	0.0158147	0.00432184	0.0369571	-0.0145557	-0.00875242
H0351.2001	superior rostral gyrus, Right	-0.0302449	-0.0194392	0.023601	0.0268316	0.0200994	-0.00937849	-0.0371575	-0.0109404	0.00567517	-0.0246816	0.0122433	-0.0138258	-0.0196924	-0.0272873	0.0326855	0.00375737	0.0135153	-0.017266	0.00190626
H0351.2001	middle frontal gyrus, Right, superior bank of gyrus	-0.0258987	-0.0547813	0.0450836	0.00326697	0.0381643	0.0426524	-0.0131144	0.00389065	0.00627421	-0.0479727	0.0211599	-0.0270241	-0.049068	-0.0848702	0.0110217	0.00266957	0.0701265	0.00684856	-0.0413558
H0351.2001	lingual gyrus, Left, peristriate	0.0412536	0.0515603	-0.0348555	-0.0114231	-0.0654319	-0.00834046	-0.0133174	0.0016299	-0.0304408	0.0479153	-0.0117225	-0.0161705	-0.0166319	0.0268714	-0.0385329	-0.03326	-0.0584802	-0.0212459	0.0214274
H0351.2001	occipito-temporal gyrus, Left, superior bank of gyrus	0.0199792	0.000600185	0.0206092	-0.0125964	0.0150747	0.0313577	0.0373817	-0.0107203	0.00976313	0.0226637	0.0435566	-0.0044936	-0.0195496	-0.019531	-0.0165769	-0.0354989	-0.0308957	-0.0412787	-0.00794338
H0351.2001	occipito-temporal gyrus, Left, inferior bank of gyrus	0.0215896	0.00269065	-0.00536736	-0.0104154	-0.0367658	0.00957894	-0.0147059	-0.00787829	-0.00307282	0.0300701	0.0251469	-0.0675494	-0.0202364	-0.0330758	-0.00856018	-0.00767442	0.0301391	0.0288175	-0.00285868
H0351.2001	lingual gyrus, Right, peristriate	0.0410667	0.0441382	-0.0299945	-0.0127908	-0.0497138	0.00171301	-0.00104501	0.00304093	-0.0310009	0.0429606	-0.0100712	0.0133449	-0.0116114	0.0289705	-0.0494155	-0.0597737	-0.0375204	-0.00884746	0.0169743
H0351.2001	lingual gyrus, Right, striate	0.0334589	0.00844368	-0.0690223	-0.0581667	-0.0699113	-0.0173322	0.0168276	0.0432554	-0.0109436	0.0815493	0.0267325	-0.055891	0.024385	0.0066327	-0.00911798	0.0248446	0.0177618	0.0632648	0.00161986
H0351.2001	cuneus, Right, peristriate	0.00407557	0.0390187	-0.0691458	-0.0380341	-0.0647453	-0.0221936	0.0393733	0.00790828	-0.0412704	0.0325214	-0.0316716	-0.000204339	0.000468205	0.0553206	-0.0130207	-0.00677998	-0.0556638	0.00712206	-0.0152976
H0351.2001	lingual gyrus, Right, striate	0.0340718	0.0560846	-0.105743	-0.0677697	-0.0903034	-0.0639921	0.0155186	0.0499775	-0.0253957	0.0825039	-0.0155594	0.0108189	0.0467539	0.0809891	-0.00521075	0.0308596	-0.0519802	0.0286247	0.0354306
H0351.2001	angular gyrus, Left, inferior bank of gyrus	-0.00869175	-0.006981	0.0199691	0.0251574	0.0212773	-0.00314601	-0.0220973	0.0193183	0.00209274	-0.00688929	0.0252205	-0.0147623	0.00908815	-0.00791387	-0.0565204	-0.0554463	-0.0523158	-0.0513531	-0.0143269
H0351.2001	superior occipital gyrus, Left, superior bank of gyrus	0.00238242	-0.0177232	-0.00873454	-0.0211456	-0.000430608	-0.00319538	-0.00737297	-0.0192261	-0.0137179	-0.0273147	-0.0301027	-0.0144608	0.0309279	-0.00520957	0.0182071	0.00501587	0.0464335	0.0609606	-0.0142718
H0351.2001	angular gyrus, Right, superior bank of gyrus	-0.0199328	-0.00901088	-0.0307727	-0.0286155	-0.00619397	-0.0282852	0.0407985	-0.0174749	-0.0239399	-0.0455254	-0.0289503	0.0255423	0.0172663	0.0297102	0.00361357	0.0340185	-0.0108751	0.00727676	-0.013566
H0351.2001	precuneus, Right, inferior lateral bank of gyrus	0.000457481	0.0330767	-0.023165	0.00775844	-0.0511002	-0.0303056	-0.0203064	-0.00567924	-0.0330619	-0.00447068	-0.0306911	-0.000751903	-0.0264783	0.0220936	-0.012454	-0.0178799	-0.0282463	-0.00655371	-0.0100835
H0351.2001	supraparietal lobule, Right, inferior bank of gyrus	-0.00904286	0.0127737	-0.0491268	-0.0331952	-0.0646435	-0.0109112	0.026575	-0.0267632	-0.052455	-0.0283225	-0.0798131	0.0129067	0.000610941	0.0264351	-0.00530137	0.00536756	0.0129658	0.0613132	-0.015214
H0351.2001	angular gyrus, Right, inferior bank of gyrus	0.0171512	0.00126333	-0.00229227	-0.0129837	-0.0236089	-0.00725375	-0.00987723	-0.00732309	-0.0031594	0.00132292	0.00995445	-0.0222313	-0.0147415	-0.0174531	0.00652069	0.0170701	0.0234489	0.0198332	-0.00795018
H0351.2001	superior occipital gyrus, Right, superior bank of gyrus	0.00821986	0.00611159	-0.0192687	-0.0245856	-0.0142098	-0.00343707	0.0432848	0.00160814	-0.0134704	0.0113207	0.0123252	0.00225292	0.00253805	0.015114	-0.00140454	-0.00228997	-0.0115711	0.00460837	-0.00911729
H0351.2001	supraparietal lobule, Left, inferior bank of gyrus	0.0279647	0.00869744	0.0210198	0.00366755	0.0132912	0.0166629	-0.0115301	-0.00571957	-0.00513769	0.00653695	0.0173708	0.00139012	-0.0251258	-0.0102644	-0.0135383	-0.0277722	-0.0178623	-0.0337301	-0.0116788
H0351.2001	angular gyrus, Left, superior bank of gyrus	0.00949275	0.00573397	0.0201569	0.00542918	0.00914604	0.0216107	-0.00543133	-0.00562251	-0.0216626	-0.0119387	0.00204117	-0.00583684	-0.0168564	-0.00471458	-0.0364494	-0.0486385	-0.0453768	-0.0450306	0.000556251
H0351.2001	supraparietal lobule, Right, superior bank of gyrus	0.0135516	0.0196711	0.00696481	0.0078276	0.00403534	-0.0254816	-0.0338135	-0.0170511	-0.0161486	-0.0108936	-0.00575498	0.0122397	0.0152562	0.0164188	-0.00500195	-0.00798124	-0.0158467	-0.0185786	-0.00574459
H0351.2001	precuneus, Right, superior lateral bank of gyrus	-0.0181725	-0.0398034	0.0085511	-0.0101751	0.00539538	0.00539786	0.00482806	-0.0174098	-0.00467184	-0.013639	0.00487193	-0.0300752	0.00930925	-0.0442797	0.0617642	0.0420572	0.0596832	0.0418827	-0.0199147
H0351.2001	lingual gyrus, Right, striate	0.0469444	0.0564998	-0.0820636	-0.0474321	-0.0816403	-0.0416522	0.00666074	0.0280648	-0.0265411	0.0816948	-0.0167867	0.00504903	0.0189748	0.0691107	-0.022212	-0.0102211	-0.0513745	0.0212193	0.0322866
H0351.2001	middle temporal gyrus, Right, superior bank of gyrus	0.0375513	0.0175029	-0.0215731	-0.0292694	-0.0378046	-0.00992702	0.00806264	-0.00809636	-0.0140068	0.00646207	-0.00938932	-0.00459113	-0.00357338	0.00735666	0.0137439	-0.00303433	0.019762	0.0292148	-0.00561293
H0351.2001	inferior temporal gyrus, Right, bank of mts	0.00534281	0.00501014	-0.00490215	-0.0145098	-0.00378115	-0.0153802	0.00789914	-0.00925722	0.00802813	0.00184155	0.0203831	0.00500424	0.0159737	0.00157085	0.00240596	0.00392539	-0.0174593	-0.00629645	-0.00455727
H0351.2001	supraparietal lobule, Right, superior bank of gyrus	0.000157952	-0.0180462	0.0342815	-0.000528682	0.0212621	0.034518	0.023929	-0.0107333	0.00996833	0.000791587	0.0430348	-0.0270216	-0.0138914	-0.0423857	-0.0351213	-0.0434321	-0.0202501	-0.0466163	-0.021657
H0351.2001	precuneus, Right, superior lateral bank of gyrus	0.0104437	0.044142	-0.0362103	0.00528789	-0.0135575	-0.0510701	-0.043927	-0.00548027	-0.036632	-0.0253823	-0.088534	0.0618483	0.0358198	0.0645426	-0.026251	0.0267795	-0.0265181	0.00544826	-0.0119247
H0351.2001	cuneus, Left, peristriate	0.0300532	0.0320229	-0.0414855	-0.0350187	-0.0570536	-0.0354721	-0.0117895	-0.0189615	-0.0271626	0.00421835	-0.0135893	-0.00231365	-0.0117359	0.0113285	0.019047	0.0166085	0.00941158	0.0278069	-0.010049
H0351.2001	lingual gyrus, Left, striate	0.0422246	0.0575376	-0.0832898	-0.051908	-0.0878594	-0.0335976	0.015034	0.0290522	-0.0393551	0.0677036	-0.0302295	-0.00134335	0.0255517	0.0679755	-0.0391351	-0.00945695	-0.0787419	-0.00447612	0.029782
H0351.2001	precuneus, Left, , inferior lateral bank of gyrus	-0.00843807	0.0120968	-0.0311622	-0.00508463	-0.0453008	-0.0386543	-0.0158315	-0.0166732	-0.0334035	-0.0241837	-0.0399286	-0.00143623	-0.00134603	0.0108149	0.0237541	0.0210365	0.0362945	0.0532919	-0.0161756
H0351.2001	gyrus rectus, Left	-0.035118	-0.0191327	0.0434387	0.0389715	0.041105	0.0138858	-0.0420655	-0.0147961	-0.00737203	-0.027212	0.0100118	-0.000775901	-0.030053	-0.036574	0.00974365	0.00373311	-0.0119094	-0.0565023	-0.00808508
H0351.2001	medial orbital gyrus, Left	-0.0446921	-0.0416767	0.0151705	0.0174439	0.0216142	0.0175001	-0.0201482	0.00472845	-0.0139098	-0.0322742	-0.0173298	-0.0110008	-0.00902407	-0.034602	0.0319035	0.00755633	0.050764	0.0330041	-0.0346769
H0351.2001	gyrus rectus, Left	-0.0554048	0.0137588	-0.0236553	0.0214118	-0.00563996	-0.0372294	-0.00661086	-0.0191321	-0.0513398	-0.0592141	-0.0883447	0.0721749	0.0100087	0.0587066	-0.0273263	-0.0153264	-0.0384943	-0.00228926	-0.00335054
H0351.2001	superior frontal gyrus, Left, medial bank of gyrus	-0.0200999	-0.00719297	0.0360286	0.0366229	0.0283725	0.0282704	-0.0392314	-0.0126507	-0.0164735	0.000856478	-0.00677153	0.0117945	-0.0371263	-0.0176728	0.00736433	-0.0286955	-0.0319308	-0.0482088	-0.0101557
H0351.2001	precuneus, Left, , superior lateral bank of gyrus	-0.00926534	-0.0119662	-0.0013353	-0.0062384	0.00181444	-0.00666148	-0.00719813	-0.000273059	-0.00286865	-0.0197625	0.00146277	-0.0019126	0.0477025	-0.0123292	0.0063098	0.0114812	0.0229536	0.0163987	-0.00237801
H0351.2001	precuneus, Left, , inferior lateral bank of gyrus	0.0399632	0.0385553	-0.0379668	-0.0271096	-0.0282243	-0.00692676	0.0240503	0.00480519	-0.0394794	0.0349539	-0.0312511	0.0235108	-0.0125386	0.0483928	-0.0414431	-0.0329059	-0.0379816	-0.00284474	0.00470428
H0351.2001	precuneus, Right, inferior lateral bank of gyrus	0.0320882	0.0262282	-0.00181694	-0.0038377	-0.0161867	0.00335071	-0.0116481	-0.00515468	-0.0135768	0.0139983	-0.0127639	-0.00101814	0.000906204	0.00945006	-0.00370205	-0.0121397	0.00272663	0.0119231	0.0146608
H0351.2001	cuneus, Left, striate	0.0458861	0.0377998	-0.0375988	-0.0330145	-0.0330871	-0.0156289	0.00616682	0.0322963	-0.0133126	0.0727836	0.0222557	-0.00497901	0.0437509	0.028662	-0.0120756	-0.0065083	-0.0335962	-0.00118757	0.021827
H0351.2001	cuneus, Right, striate	0.0349061	0.0491982	-0.0946043	-0.0592063	-0.0801339	-0.0560308	0.00931708	0.0113746	-0.0483397	0.0439762	-0.0643946	0.0372354	0.0340506	0.0770753	-0.0161535	0.0206343	-0.0170375	0.0482916	0.00460963
H0351.2001	supraparietal lobule, Left, superior bank of gyrus	0.0292436	0.0129193	0.0241417	0.00333903	0.0210218	0.0144719	-0.0265482	-0.00221556	-0.00876176	0.00418888	0.0124604	-0.00533592	-0.006067	-0.0027594	-0.0259579	-0.0340203	-0.0190385	-0.0322586	-0.00153724
H0351.2001	supraparietal lobule, Left, inferior bank of gyrus	0.019789	-0.0048351	0.018304	0.00456298	0.0236529	0.0101432	-0.0231417	0.0148971	-0.00116032	-0.00409802	0.0153002	-0.00211092	0.0105303	-0.0072239	-0.0192334	-0.0232245	-0.00285475	-0.0195599	0.0072877
H0351.2001	supraparietal lobule, Left, inferior bank of gyrus	0.0133244	-0.00203744	0.00862766	0.00213917	0.0268794	-0.0163087	-0.0279893	0.010026	-0.0118786	-0.00381333	0.00925858	0.0344635	-0.000199256	-0.00242579	0.032212	0.0208	-0.0233487	-0.0330142	0.00341115
H0351.2001	angular gyrus, Left, superior bank of gyrus	0.0214216	0.032728	0.000515036	0.00528624	-0.00691057	-0.0270001	-0.033999	-0.0204087	-0.0286879	-0.0117442	-0.0324234	0.00883868	0.00352189	0.0298728	-0.0288717	-3.02786e-05	-0.0431383	-0.0222342	0.00343635
H0351.2001	middle frontal gyrus, Left, superior bank of gyrus	-0.00681617	0.00105283	0.0267291	0.0211657	0.0415625	-0.000368519	-0.00919313	-0.0134395	-0.0213215	-0.0240917	-0.0181482	0.0492712	-0.0133605	0.00639999	0.0181257	0.0167123	-0.0252546	-0.0488855	-0.0305745
H0351.2001	superior frontal gyrus, Left, lateral bank of gyrus	-0.0174365	-0.0120654	-0.00147073	0.00607589	0.0100398	0.0163911	0.0140006	-0.000770864	-0.032854	-0.0150761	-0.0366231	0.0202359	0.0085066	0.0177491	-0.00268074	-0.0192736	-0.0111178	-0.00602878	-0.00479557
H0351.2001	middle frontal gyrus, Right, superior bank of gyrus	-0.0184306	-0.037907	-0.00044024	-0.00738742	-0.00993046	0.00451637	0.00416121	-0.0217455	-0.011327	-0.0217981	-0.0127886	-0.0415065	-0.0069214	-0.041822	0.0707318	0.042722	0.0512511	0.04622	-0.00259439
H0351.2001	superior frontal gyrus, Left, medial bank of gyrus	-0.0307691	-0.0447048	0.043572	0.020512	0.0417883	0.0246448	0.000794735	-0.00460269	0.0296675	0.00379244	0.0567132	-0.0378078	-0.025361	-0.0590984	-0.000739217	-0.0371424	0.0125471	-0.0289766	0.00217383
H0351.2001	lingual gyrus, Left, peristriate	0.028696	0.0160347	-0.0386409	-0.0485971	-0.0412583	-0.0123653	0.0253268	-0.0219834	-0.0191783	0.0298172	0.00533731	-0.000376268	-0.00457534	0.00176039	0.0331303	0.0335514	0.000814597	0.0224946	-0.00282718
H0351.2001	inferior rostral gyrus, Right	-0.0660762	-0.0511998	0.0150524	0.00862856	0.0376562	0.00256427	0.0237982	-0.00969162	0.00190148	-0.0332811	0.0249877	0.0227285	-0.0137441	-0.0363435	0.074593	0.0269985	0.0205459	-0.00535386	-0.0188717
H0351.2001	Short Insular Gyri, Left	-0.010067	0.00197695	-0.000399498	0.00872259	-0.00466079	-0.0241245	-0.0194738	-9.24166e-05	-0.025364	-0.0305375	-0.0228335	-0.00837838	-3.49358e-05	-0.000986775	0.00721265	0.00731634	0.0170933	0.00693441	-0.0241495
H0351.2001	post central gyrus, Right, bank of the central sulcus	0.0381904	0.0285225	-0.0312608	-0.0332725	-0.0227667	0.0135112	0.0331228	0.0192439	-0.0221681	0.0539936	0.014925	0.0136495	-0.0139347	0.0238924	-0.0157448	-0.0193493	-0.0291039	0.00128485	-0.00302851
H0351.2001	occipito-temporal gyrus, Left, inferior bank of gyrus	0.00726053	0.0183492	0.0030116	0.00795197	-0.00790963	-0.00146787	-0.0145549	-0.0087574	-0.0330857	-0.00818509	-0.0283484	0.00732428	-0.00301266	0.00646444	-0.0145582	-0.0181818	-0.00641369	-0.00460442	-0.0222278
H0351.2001	fusiform gyrus, Left, bank of the its	-0.00390768	-0.0134495	0.0285078	0.0161519	-0.0295482	0.00444741	-0.0217381	-0.00352421	0.0328942	0.00916228	0.0520703	-0.0929532	-0.0288158	-0.0649077	-0.0959358	-0.065473	-0.0221863	-0.0556558	0.00723435
H0351.2001	fusiform gyrus, Left, lateral bank of gyrus	-0.00482157	0.0112325	0.0183436	0.0223633	-0.00250284	-0.00978887	-0.0364475	-0.0190371	-0.0141936	-0.0235097	-0.0161976	-0.0149132	-0.00705151	-0.00960582	0.0172675	-0.0288027	0.00123618	0.00702068	-0.000468674
H0351.2001	fusiform gyrus, Left, bank of cos	-0.014758	0.0114475	0.00761005	0.0245126	-0.00628002	-0.0221087	-0.0182694	-0.0162222	-0.0128358	0.00346633	-0.00168082	-0.0123996	-0.0143953	0.00356302	-0.0195968	-0.0119839	-0.0348835	-0.0264192	-0.00730719
H0351.2001	fusiform gyrus, Right, bank of cos	-0.00363499	0.00775961	0.0286057	0.0234017	0.0136621	0.00141955	-0.0164109	-0.0118021	0.000328243	-0.000203297	0.0177948	-0.00187521	-0.0216812	-0.0172407	0.00691702	-0.00939001	-0.00327027	-0.0210788	-0.00248898
H0351.2001	fusiform gyrus, Right, lateral bank of gyrus	-0.00287708	0.0193816	0.0105713	0.0188066	-0.0142004	-0.0212527	-0.0259294	-0.0332107	-0.0226303	-0.0102901	-0.0113937	-0.00781077	-0.010434	0.00517091	0.00188277	-0.0197006	0.00431812	-0.00409867	-0.0161188
H0351.2001	Heschel's gyrus, Left	0.0218131	0.0192418	-0.022002	-0.018442	-0.0185703	0.00856427	0.023004	0.00407362	-0.0196381	0.0415164	0.0162849	-0.000558618	-0.0210438	0.0133274	-0.0326109	-0.0171986	-0.0431589	-0.0235132	-0.0126103
H0351.2001	Long Insular Gyri, Left	0.00860698	0.0008356	0.00156752	0.00534915	-0.0315411	-0.0175882	-0.0121802	-0.0166019	0.0587272	-0.00840403	0.0213334	-0.0506317	0.00619667	-0.0375048	-0.0164577	0.0160664	0.0266751	0.00285997	0.111029
H0351.2001	Putamen, Left	-0.0627752	-0.088446	-0.0837262	0.00413832	0.0598091	0.00509753	0.0532953	0.094586	-0.0337438	0.0146626	-0.0285719	0.0618694	0.0814654	0.0505485	0.00756576	0.0212147	-0.0333638	0.0216614	-0.0295564
H0351.2001	Heschel's gyrus, Right	0.0290146	0.0308798	-0.0436366	-0.0288354	-0.056583	-0.00718566	0.0106357	-0.000411675	-0.0404902	0.0185288	-0.0337907	0.00646932	-0.0147982	0.0232728	-0.0138566	-0.00877325	-0.00959577	0.018829	-0.0214119
H0351.2001	Long Insular Gyri, Right	0.0089524	0.0246853	-0.0158292	0.0125641	-0.0149613	-0.0394107	-0.0236763	0.0172675	-0.022343	0.026163	-0.00359364	0.0102181	0.000418536	0.0236745	-0.0244221	-0.0227335	-0.0452666	-0.0190505	-0.000128812
H0351.2001	superior temporal gyrus, Left, inferior bank of gyrus	0.00733912	0.00256378	0.00656673	0.00494529	-0.0155961	-0.0226661	-0.034359	-0.0196542	-0.00684113	-0.0158901	-0.00859403	-0.0198628	-0.0105304	-0.0295757	0.0604288	0.0323235	0.0564787	0.0282344	-0.00542992
H0351.2001	middle temporal gyrus, Left, superior bank of gyrus	-0.00420067	0.0015226	0.0060655	0.00271192	-0.020416	0.00602955	-0.00498679	-0.0243057	-0.0230555	-0.0187883	-0.00869447	-0.021724	-0.0269211	-0.0193104	-0.013902	-0.000781551	0.0328638	0.0137706	-0.0257625
H0351.2001	middle temporal gyrus, Left, inferior bank of gyrus	-0.00145426	0.0060953	0.0201079	0.0187317	0.0216016	-0.0405776	-0.0374584	-0.00909727	0.00829963	0.000732888	0.0308995	-0.00870419	0.0215153	-0.0152714	0.0393954	0.0189735	-0.0165202	-0.0277286	-0.00279768
H0351.2001	inferior temporal gyrus, Left, lateral bank of gyrus	-0.00975286	-0.00300682	0.0140719	0.00820983	0.0193443	-0.00331545	-0.0254318	-0.0096775	-0.0152126	-0.0206634	-0.00867615	0.0146415	-0.0060595	-0.0155195	0.0172484	0.00206588	0.0233523	-0.0070833	-0.00405793
H0351.2001	inferior temporal gyrus, Left, bank of mts	-0.00619089	0.00449777	0.0248625	0.0234222	0.00846834	-0.000979799	-0.0282705	-0.00150272	0.000239877	0.00204519	0.016229	-0.0247745	-0.0179302	-0.0231722	-0.0484074	-0.0427563	-0.0310505	-0.0478074	-0.000210547
H0351.2001	superior temporal gyrus, Right, lateral bank of gyrus	0.0116789	0.0070294	0.0233411	0.00747449	-0.00142925	0.00446952	-0.0206564	-0.0271935	-0.0039669	-0.00423768	0.0102768	-0.0101753	-0.026244	-0.0252395	-0.0205332	-0.0159444	-0.00503038	-0.0210824	-0.0177136
H0351.2001	superior temporal gyrus, Right, inferior bank of gyrus	0.0207909	0.0241423	0.0100873	0.0116035	-0.0235845	0.0299748	-0.0159759	-0.00656792	-0.0411598	0.0029325	-0.0501829	-0.00839249	0.00794956	0.00434586	-0.0846432	-0.0332735	-0.0259864	-0.0253403	-0.00873698
H0351.2001	middle temporal gyrus, Right, superior bank of gyrus	-0.00049082	0.000288314	0.032659	0.0125135	0.00919382	0.00741203	-0.0127484	-0.0143184	0.00582067	-0.00408836	0.0311473	-0.0232394	-0.0266409	-0.033309	-0.0244256	-0.0301337	-0.0132482	-0.0393103	-0.0160548
H0351.2001	middle temporal gyrus, Right, inferior bank of gyrus	-0.0105779	-0.00314169	0.00826133	-0.0057663	0.00352023	0.0231496	0.0181913	-0.0173653	-0.0195816	0.00225955	0.00791084	-0.00388319	-0.00586854	-0.00887109	-0.00669709	-0.021234	0.00807728	0.012955	-0.0338016
H0351.2001	inferior temporal gyrus, Right, bank of the its	-0.0136364	-0.00262554	0.00208461	0.00717991	-0.00436457	-0.00276338	-0.00567494	-0.0158266	0.0201147	-0.0327954	-0.0151019	-0.0062783	0.0060683	-0.00965374	-0.0159067	0.00325185	0.0169854	-0.00110821	0.06649
H0351.2001	inferior temporal gyrus, Right, lateral bank of gyrus	-0.00599005	0.00649135	0.0346902	0.0197941	0.0337564	-0.0176212	-0.0286606	-0.0200242	-0.00163185	-0.00726936	0.0250712	0.00926817	-0.0225165	-0.0129497	0.000760738	-0.000316123	-0.0230399	-0.0490344	-0.0179242
H0351.2001	inferior temporal gyrus, Right, bank of mts	-0.00617406	0.00267564	0.00613866	0.00853765	0.00549183	-0.0363735	-0.0356164	-0.00465371	-0.00754095	-0.0318472	-0.00489137	0.00255655	-0.00379247	-0.0110563	0.0226238	0.0269233	0.00822018	-0.00590216	-0.00689279
H0351.2001	fusiform gyrus, Right, bank of the its	-0.00753629	-0.0130499	-0.00362916	0.00346185	-0.0217353	-0.0247193	-0.0108658	-0.0166668	0.0515154	-0.0297314	0.00880057	-0.0394127	0.0156037	-0.0339925	-0.0111978	0.0297573	0.0275031	0.00511713	0.100485
H0351.2001	post central gyrus, Right, inferior lateral aspect of gyrus	-0.00637404	-0.00132586	-0.00364933	-0.000480201	-0.00143346	-0.0114745	-0.000484738	-0.0160811	-0.0216231	-0.0214287	-0.022659	0.000730445	0.00574641	-0.0084665	0.0171581	0.0221184	0.0372231	0.0281255	-0.0211686
H0351.2001	planum temporale, Right	0.0240806	0.00960282	-0.0114427	-0.0160704	-0.0350042	-0.00188952	-0.00931444	-0.0135122	-0.0199861	0.00267459	-0.0108997	-0.0154379	-0.0205446	-0.0237323	0.0288244	0.0108735	0.0428845	0.035634	-0.0150318
H0351.2001	precentral gyrus, Left, bank of the precentral sulcus	0.0171025	0.00962918	0.0217432	0.00661964	0.000825996	-0.0184001	-0.017024	0.000334443	-0.00469654	-0.0127203	0.0269971	-0.0142591	-0.0208086	-0.0241448	-0.0020553	-0.010261	-0.0288416	-0.046593	-0.0251711
H0351.2001	precentral gyrus, Left, superior lateral aspect of gyrus	0.0243381	0.016907	0.00916204	-0.000993339	-0.0113396	-0.00488899	-0.0173973	-0.0178487	-0.0322702	-0.0271164	-0.0288771	-0.00126241	-0.0152523	-0.00276527	0.00434411	0.00683914	0.0157224	-0.00826785	-0.0305806
H0351.2001	precentral gyrus, Left, inferior lateral aspect of gyrus	0.0336324	0.0237166	0.0101955	0.00437406	-0.0284899	-0.0317891	-0.0190629	0.000161659	-0.0275936	0.024439	-0.0167448	-0.074797	0.0261216	-0.0156483	0.095435	-0.0281704	-0.0308057	0.0693446	-0.0213218
H0351.2001	middle frontal gyrus, Left, inferior bank of gyrus	0.0171064	0.0052663	0.0168802	0.0033568	0.00988074	-0.0258074	-0.00867312	-0.00336111	-0.000418454	-0.0105606	0.0219858	-0.0151872	-0.00452535	-0.0196242	0.00932636	-0.0042573	0.00850323	-0.0118621	-0.0208434
H0351.2001	superior frontal gyrus, Left, medial bank of gyrus	0.0155331	0.0175399	0.0118224	0.00582065	-0.00426507	-0.042292	-0.0187383	-0.0123368	-0.0091416	-0.0249785	0.00409526	0.00313652	-0.00490437	-0.00781765	0.0400909	0.020439	-0.0204816	-0.0348988	-0.0136459
H0351.2001	superior frontal gyrus, Left, lateral bank of gyrus	0.0106736	0.0194822	0.0345932	0.0176467	-0.0159845	0.00274005	0.00800497	-0.014004	-0.00314078	-0.0340795	0.00574268	-0.0438326	-0.0259602	-0.0347401	-0.00541168	-0.0188139	0.0256227	-0.0280716	-0.0183742
H0351.2001	middle frontal gyrus, Left, superior bank of gyrus	0.0184784	0.00578658	0.0308252	0.00482483	-0.00399641	0.0108737	-0.0150673	-0.020255	-0.0110156	-0.0238971	0.00346201	-0.0252703	-0.0164116	-0.0377754	-0.0100427	-0.0204215	0.0249859	-0.0129662	-0.0288634
H0351.2001	superior frontal gyrus, Right, medial bank of gyrus	0.0125866	0.0111725	0.00391053	-0.00104267	-0.0219933	-0.0276008	-0.0143726	-0.0039029	-0.0189677	-0.0252884	5.57112e-05	-0.011776	-0.0169103	-0.00610334	0.0161597	0.0142693	0.0114511	-0.00700018	-0.0268035
H0351.2001	precentral gyrus, Right, bank of the precentral sulcus	0.0192913	0.00884512	0.0337873	0.00693857	0.00651451	0.0295911	-0.00389805	-0.00530571	-0.015254	-0.000259413	0.00686352	-0.0158797	-0.0379422	-0.0239623	-0.0296882	-0.0567142	-0.0214567	-0.027321	-0.0198172
H0351.2001	precentral gyrus, Right, superior lateral aspect of gyrus	0.0201588	0.0193673	-0.00275457	0.000622239	-0.0145803	-0.00826851	-0.0157266	-0.00651047	-0.0437625	-0.0217364	-0.0563924	0.00389774	0.000656684	0.0132091	0.00106174	0.00192682	-0.00701913	0.00744636	-0.0228176
H0351.2001	precentral gyrus, Right, inferior lateral aspect of gyrus	0.0303025	0.0176255	0.0131943	-0.00106261	-0.0139179	0.00108695	-0.0146768	-0.00879887	-0.0277994	-0.0163583	-0.0225148	-0.0122784	-0.0198206	-0.0128086	-0.0094964	-0.011092	-0.0061775	-0.0181743	-0.0318613
H0351.2001	precentral gyrus, Right, bank of the central sulcus	0.0390135	0.0438557	-0.0577705	-0.0196013	-0.0765351	-0.0337105	-0.0185556	0.00771802	-0.0448398	0.0221291	-0.0715221	0.00930615	0.00969146	0.0451806	-0.0217168	0.000614276	-0.022748	0.0225386	0.0155253
H0351.2001	superior frontal gyrus, Right, lateral bank of gyrus	0.0175294	0.00483919	0.0172872	0.00875468	-0.00372747	-0.00717683	-0.0237811	0.0117499	-0.00718713	-0.0150431	-0.00020259	-0.0109497	-0.0266145	-0.0313001	-0.00436478	-0.00079088	0.0202606	-0.0104856	-0.0123238
H0351.2001	middle frontal gyrus, Right, superior bank of gyrus	0.0169647	0.00976028	0.0141307	0.0017724	-0.0313566	0.00361726	-0.0169941	-0.018648	-0.0292839	-0.0319383	-0.0242134	-0.0146235	-0.0307244	-0.0336113	0.0181776	0.0111782	0.0446669	0.0165823	-0.0295462
H0351.2001	middle frontal gyrus, Right, inferior bank of gyrus	0.0187932	0.00863755	0.0287054	0.00939683	0.011546	-0.0107555	-0.0126892	-0.0103343	0.00143954	-0.00189191	0.0274921	-0.0161086	-0.0249628	-0.0239504	-0.012176	-0.0175726	-0.0216006	-0.046659	-0.0203809
H0351.2001	post central gyrus, Right, bank of the central sulcus	0.0405159	0.0141035	0.0259638	-0.0119838	0.0114875	0.044966	0.0262147	0.0124987	-0.0238877	0.0231709	0.0254987	-0.0218978	-0.0452554	-0.0266509	-0.0237064	-0.0526612	-0.00670902	-0.0324801	-0.030244
H0351.2001	precentral gyrus, Left, bank of the central sulcus	0.030071	0.0140243	0.00790067	-0.00171276	-0.0259523	-0.0101176	-0.0112656	0.0028389	-0.00750759	0.00342197	0.0194558	-0.0311546	-0.0243397	-0.0141435	-0.0233083	-0.0305343	-0.0253963	-0.0308625	-0.0106542
H0351.2001	post central gyrus, Left, bank of the central sulcus	0.0313592	0.0380293	-0.0596999	-0.0305832	-0.0618779	-0.0464275	-0.00855541	0.00374886	-0.0516671	0.0271915	-0.0505729	0.00735845	0.00297381	0.0461508	-0.00761753	-0.00797399	-0.0208835	0.0343851	-0.0298493
H0351.2001	superior frontal gyrus, Left, medial bank of gyrus	-0.0103457	-0.00774543	0.03535	0.0185887	0.0180149	0.0106056	-0.029185	-0.0269821	-0.00186647	-0.0237614	0.0143382	-0.00630149	-0.0347291	-0.0390507	0.0169854	-0.00843764	0.0151885	-0.0282805	0.00327654
H0351.2001	middle frontal gyrus, Right, superior bank of gyrus	0.0141001	0.00494911	0.0257232	0.00656131	-0.00902195	0.00981643	-0.00899992	-0.00956096	-0.004799	-0.0162137	0.0116849	-0.0311367	-0.030456	-0.0347745	-0.0323353	-0.0406571	-0.00774643	-0.0330059	-0.0157938
H0351.2001	middle frontal gyrus, Left, superior bank of gyrus	0.0133239	-0.0024236	0.0275792	0.00323394	-0.00320886	-0.0159951	-0.0272567	-0.0291637	6.01135e-05	-0.0328819	0.00562872	-0.028287	-0.0172942	-0.0450869	0.0495526	0.0241347	0.0409278	0.00189898	-0.034161
H0351.2001	inferior temporal gyrus, Right, bank of the its	-0.00823339	-0.00215254	0.0151346	0.00503711	-0.000304414	0.00682748	0.00576615	-0.02087	-0.00903169	0.0016324	0.0158955	-0.0254379	-0.00860417	-0.0262413	-0.0058929	-0.0146181	0.0217068	0.00107533	-0.0308785
H0351.2001	middle temporal gyrus, Right, superior bank of gyrus	-0.00372859	0.00586495	0.0237065	0.00967465	0.00286311	0.00666323	-0.0169257	-0.0209343	-0.0201857	-0.0158503	-0.00766623	-0.00711146	-0.0222178	-0.0261093	0.0112953	-0.0110146	0.00496998	-0.0156595	-0.0259883
H0351.2001	inferior temporal gyrus, Left, lateral bank of gyrus	-0.00646741	0.0051499	0.0175537	0.0186673	0.00747864	-0.00481488	-0.0335482	-0.0170836	-0.0238052	-0.0203772	-0.0181025	-0.00820879	-0.0089461	-0.0128844	-0.00276743	0.00336704	0.0229175	0.00313161	-0.020963
H0351.2001	middle temporal gyrus, Left, superior bank of gyrus	0.00422825	0.00737908	0.026964	0.0205205	0.00951746	-0.0025041	-0.0214656	-0.0123537	0.000676888	0.00900683	0.0171819	-0.0212477	-0.0145442	-0.0220906	-0.0320837	-0.0309814	-0.0154983	-0.0331494	-0.00299056
H0351.2001	Putamen, Left	-0.0495459	-0.0792838	-0.0660636	0.0321034	0.0400824	0.00620206	0.042314	0.0879432	-0.0319362	0.0400325	-0.0202133	0.0328795	0.0246485	0.0403864	-0.0180646	-0.026193	-0.0678752	0.0226931	-0.0265862
H0351.2001	precentral gyrus, Right, bank of the central sulcus	0.0234666	0.00953086	0.00906507	-0.0139718	-0.0214216	0.0236275	0.0223005	-0.0123935	-0.0118262	0.00678013	0.0230718	-0.025503	-0.0343944	-0.022603	-0.00926426	-0.0244869	0.0106781	-0.0130002	-0.0151566
H0351.2001	globus pallidus, internal segment, Right	-0.0298947	-0.0993729	-0.0727764	-0.130409	0.103289	0.0639444	0.098061	0.13561	-0.0163183	0.044668	0.0211579	0.0755807	0.0405689	0.0382106	0.044541	0.0482154	-0.0070418	0.0386899	-0.0158032
H0351.2001	inferior temporal gyrus, Left, bank of the its	-0.0170194	0.00556452	0.00634312	0.0247884	0.00236175	-0.0214597	-0.0276027	-0.00218649	-0.0219644	-0.01094	-0.0170902	0.00218879	0.00467357	-0.000590406	0.0236456	-0.00330822	-0.00760414	-0.0104679	-0.0127635
H0351.2001	fusiform gyrus, Left, lateral bank of gyrus	-0.0292141	-0.000195834	0.0140371	0.0301343	0.0164929	-0.014295	-0.0272637	-0.00572942	-0.0234834	-0.015489	-0.0257865	0.000356191	-0.00499542	0.00667467	-0.0212165	-0.00368902	-0.0194178	-0.0242042	-0.0233003
H0351.2001	parahippocampal gyrus, Left, lateral bank of gyrus	-0.0169515	0.0291491	-0.0589874	0.00680179	-0.0434729	-0.0491876	-0.00514555	0.0211608	-0.0577024	-0.0180472	-0.0867178	0.0445758	0.0129345	0.0667267	-0.000720733	0.00876378	-0.0476761	0.00287458	-0.00682286
H0351.2001	parahippocampal gyrus, Left, bank of the cos	-0.0133146	0.0135123	-0.0560419	-0.000952211	-0.044283	-0.0433892	-0.0114154	0.0294078	-0.0536537	-0.0154062	-0.0650609	0.00810858	0.00254555	0.0350981	0.0296921	0.039972	0.0107568	0.0342198	-0.0390774
H0351.2001	Cingulate gyrus, parietal part, Left, superior bank of gyrus	-0.0128816	0.00538664	0.00334002	0.00896238	-0.0170005	-0.0217553	-0.0112902	-0.0115574	-0.0256498	-0.027369	-0.0089026	0.011075	-0.0257717	-0.00720354	0.0177943	0.00962774	0.00189496	-0.0099819	-0.0331049
H0351.2001	Cingulate gyrus, parietal part, Left, inferior bank of gyrus	-0.00493384	0.0139052	-5.49317e-05	0.0103518	-0.0154966	-0.0285564	-0.0216615	-0.010721	-0.0359595	-0.0285329	-0.0316356	0.0190566	-0.00102899	0.00792686	0.028214	0.00847893	-0.0218437	-0.0213589	-0.0297264
H0351.2001	Cingulate gyrus, parietal part, Right, superior bank of gyrus	-0.00941469	0.00590331	0.0050307	0.0185565	-0.0263607	-0.0232514	-0.0282677	-0.0109459	-0.0174537	-0.0120382	-0.0170192	-0.0105415	0.00307156	-0.0201781	0.0416287	0.00119714	0.0172951	0.00370088	-0.0134426
H0351.2001	Cingulate gyrus, parietal part, Right, inferior bank of gyrus	-0.00501211	0.00805624	0.0194867	0.0174437	-0.0172041	-0.00832833	-0.0334721	-0.0180308	-0.0228397	-0.0330501	-0.0154075	-0.00561919	-0.018291	-0.0174516	0.00742868	-0.019519	0.0217009	-0.00783807	-0.0127886
H0351.2001	corpus callosum	-0.105768	-0.106365	-0.0640826	-0.137529	0.121602	0.148684	0.142878	0.0334046	-0.0175225	0.0803204	0.0645328	0.112166	0.0416716	0.0697986	0.0164497	-0.00298219	-0.025301	0.0369328	-0.0182297
H0351.2001	cingulum bundle, Left	-0.103625	-0.0762229	-0.0892014	-0.123556	0.0520743	0.0791476	0.135629	-0.0230606	-0.00658072	0.0680273	0.0328723	0.110478	0.132374	0.119802	0.0305618	0.0468989	-0.0497313	0.0587949	0.0189703
H0351.2001	cingulum bundle, Right	-0.0830732	-0.0449956	-0.0621256	-0.0793444	0.047269	0.0924732	0.139222	-0.014815	-0.0263987	0.0561043	0.0299768	0.0865986	0.0171231	0.0994927	0.0276628	0.00201651	-0.0556838	0.0217868	-0.0161498
H0351.2001	corpus callosum	-0.0906153	-0.103379	-0.068778	-0.11236	0.050722	0.101318	0.121386	-0.00598113	0.0728635	0.0501654	0.0593899	0.0465506	0.0395368	0.0239998	0.0410631	0.0563924	0.00596367	0.0694509	0.161838
H0351.2001	Cingulate gyrus, frontal part, Left, inferior bank of gyrus	-0.0861031	-0.0597221	-0.0211681	-0.00927685	0.0429716	0.00829465	0.0667151	0.00997118	-0.00193545	-0.0137284	0.00859813	0.0514019	0.00535119	0.0256479	-0.0112975	-0.00162354	-0.0429584	-0.0260201	-0.00859472
H0351.2001	Cingulate gyrus, frontal part, Right, superior bank of gyrus	-0.0609904	-0.0364657	-0.00809359	0.0121291	-0.0194411	-0.0232081	-0.00510399	-0.00235089	-0.00426398	-0.0324722	-0.00560174	0.00956172	-0.0108654	-0.0234558	0.0363216	0.0171975	0.0146582	0.00641354	0.0181263
H0351.2001	gyrus rectus, Right	-0.0286347	-0.0215893	0.0317481	0.0214802	0.0298141	-0.00166657	-0.0199462	-0.0280777	0.0128298	-0.0141436	0.024948	-0.0252644	0.000146188	-0.0349251	0.0176536	-0.0046803	0.0315453	0.0014486	-0.00186644
H0351.2001	medial orbital gyrus, Right	-0.0534842	-0.0472067	0.00757816	-0.00271311	0.0300772	0.0132964	0.0225454	-0.0230315	-0.00439459	-0.0303219	-0.00414879	0.016928	0.0110393	-0.0263814	0.0274341	0.023791	0.0367473	0.0216111	-0.0198781
H0351.2001	middle frontal gyrus, Left, inferior bank of gyrus	0.008981	-0.0203187	0.0271814	0.00242776	-0.0158016	0.0164472	-0.0224781	-0.0160295	0.0135209	-0.00922382	0.0147991	-0.0476819	-0.0455494	-0.0649174	-0.0238919	-0.036637	0.0245703	-0.0113498	0.0172503
H0351.2001	Inferior frontal gyrus, triangular part, Left	0.00299526	-0.010844	0.0413676	0.0187448	0.0017273	-0.00581871	-0.0307337	-0.0272705	0.0206919	-0.0307951	0.0332052	-0.0229983	-0.0385508	-0.0553551	0.00304421	0.0134051	0.0183874	-0.0155668	0.0123107
H0351.2001	inferior frontal gyrus, orbital part, Left	-0.0146442	-0.0169925	0.0302548	0.0221975	0.0464073	0.0089153	-0.0224934	0.0223315	0.0168822	0.00173399	0.0215916	0.0353803	-0.0323562	-0.0232576	-0.0344438	-0.0244649	-0.0340898	-0.0541812	0.0123843
H0351.2001	frontal operculum, Left	-0.0035778	-0.009573	0.0243826	0.012565	-0.013902	-0.00440254	-0.0352011	-0.0385397	-0.00638979	-0.0376297	-0.0166101	-0.0229199	-0.0389168	-0.0443499	0.0164615	0.00599217	0.0405789	0.0134636	0.0021642
H0351.2001	Short Insular Gyri, Left	-0.0172579	-0.00974446	0.0203983	0.0241009	0.0352927	-0.00305289	-0.00266556	0.0252382	-0.00183364	-0.0104635	0.0204571	-0.00233807	0.0333329	0.00528463	-0.052636	-0.040239	-0.0676555	-0.0684499	0.000757689
H0351.2001	superior frontal gyrus, Left, lateral bank of gyrus	-0.0135454	-0.0203387	0.0412323	0.0176988	0.0231445	0.00110245	-0.0149331	-0.0325168	0.0231489	-0.0135697	0.0451262	-0.0101224	-0.0368626	-0.0464606	-0.0035705	-0.0141179	0.00435302	-0.0317945	0.00636766
H0351.2001	middle frontal gyrus, Left, superior bank of gyrus	-0.0113514	-0.047826	0.0327439	-0.00350206	0.00162149	0.0302981	-0.00777606	-0.0137085	0.014827	-0.0263442	0.0149687	-0.0684559	-0.0356782	-0.0834518	0.0186725	0.00585056	0.0544986	0.00851469	0.000600674
H0351.2001	superior frontal gyrus, Right, lateral bank of gyrus	-0.0318832	-0.0487516	0.0245057	-0.017746	0.0376006	0.0735721	0.0877182	-0.0170513	0.0249755	0.0319516	0.07091	-0.00253158	-0.0463609	-0.0314848	-0.0633903	-0.0878232	-0.0552817	-0.071156	-0.00547382
H0351.2001	middle frontal gyrus, Right, superior bank of gyrus	-0.00418989	-0.0331555	0.0309797	0.00483378	-0.0200375	0.00303276	-0.0423988	-0.0463281	0.0105348	-0.0336801	0.00607148	-0.067683	-0.045938	-0.0849319	0.0619724	0.0278481	0.0547893	0.0220459	-0.0170596
H0351.2001	middle frontal gyrus, Right, inferior bank of gyrus	0.0152098	-0.00731296	0.0520295	0.020133	0.0276833	0.0282657	-0.015951	-0.00764053	0.0308665	0.0145657	0.0642649	-0.0163398	-0.049162	-0.0461622	-0.0417109	-0.0626972	-0.0640571	-0.093169	0.00550986
H0351.2001	posterior orbital gyrus, Right	-0.0418243	-0.0412675	0.0181646	0.00277373	0.0187903	0.0362107	0.0240657	-0.0213841	-0.00495714	-0.0210612	-0.00681251	-0.0044015	-0.0194121	-0.0292947	-0.00533921	-0.0129062	0.0271174	0.00748139	0.00137417
H0351.2001	temporal pole, Right, medial aspect	-0.0638501	-0.0544301	0.0284228	0.0395874	0.0792413	0.023202	-0.00708654	0.0504193	0.0245952	-0.000278259	0.0284095	0.0254035	-0.0317925	-0.0224424	-0.0431927	-0.074113	-0.0500036	-0.0765467	0.0301624
H0351.2001	temporal pole, Right, superior aspect	-0.0600584	-0.041705	0.053794	0.0462839	0.0503524	0.0440009	0.00317844	-0.010672	0.0278087	0.000804725	0.0466705	-0.0159435	-0.0477789	-0.0431726	-0.0530078	-0.0848958	-0.0497225	-0.0810975	0.0319805
H0351.2001	temporal pole, Right, inferior aspect	-0.0403846	-0.00562479	0.0371517	0.0347948	0.0320675	0.00923054	-0.0149811	-0.0303545	-0.00694866	-0.0268778	0.00201821	0.00858498	-0.0149486	-0.0120932	-0.0297338	-0.050705	-0.0426714	-0.0544157	-0.0187041
H0351.2001	temporal pole, Left, superior aspect	-0.0620528	-0.0237728	0.0336776	0.0415149	0.0564925	-0.00128511	-0.0234266	-0.0113779	0.000350958	-0.0293121	0.013116	0.0270302	-0.0114162	0.000452664	-0.0222128	-0.0482754	-0.0476967	-0.0617585	-0.00499007
H0351.2001	temporal pole, Left, inferior aspect	-0.0379402	-0.0147648	0.0437035	0.0475068	0.0281346	0.0102756	-0.022885	-0.0097079	0.0110396	-0.0254923	0.0304553	0.00508601	-0.0463586	-0.0282862	-0.0331132	-0.0650449	-0.0575876	-0.0743625	0.00283365
H0351.2001	temporal pole, Left, medial aspect	-0.0652578	-0.040455	0.0215344	0.0303512	0.0726931	-0.0158929	-0.0143397	0.0184413	0.0056819	-0.0493049	-0.00189424	0.0291854	0.0261664	0.00261119	0.010647	0.00301234	0.00644875	-0.0196977	0.00332917
H0351.2001	superior frontal gyrus, Right, medial bank of gyrus	-0.0108635	-0.0236734	0.0440572	0.0206451	0.00383345	0.0219599	-0.0202237	-0.021536	0.0116393	-0.019732	0.0226586	-0.0442325	-0.0335292	-0.0650248	0.0127705	-0.0144083	0.033732	-0.0111147	0.0112941
H0351.2001	Cingulate gyrus, frontal part, Right, superior bank of gyrus	-0.0213163	-0.0262555	0.014928	0.00540865	0.00162005	0.0166392	0.0154957	-0.000662743	-0.00894072	-0.0231988	-0.000626971	-0.0166661	-0.021041	-0.0350132	-0.00328233	-0.0249105	0.0243242	0.00510138	-0.00744546
H0351.2001	Short Insular Gyri, Right	-0.0397932	-0.0410008	0.0168913	0.00943424	-0.0137263	0.0150306	-4.51159e-05	-0.0249858	-0.000535052	-0.0393624	-0.00688318	-0.044717	-0.042401	-0.0581487	0.0432326	0.0165814	0.0473498	0.0207361	-0.00712455
H0351.2001	post central gyrus, Left, inferior lateral aspect of gyrus	-0.0105911	-0.000625499	-0.0230273	-0.0194178	0.0234436	-0.0107128	0.0172638	0.0136078	-0.0226381	-0.0145959	-0.0259382	0.0430865	0.0338801	0.0329998	-0.00751738	0.00631463	-0.0133917	0.00418162	-0.0214832
H0351.2001	post central gyrus, Left, bank of the posterior central sulcus	0.000114449	0.00734398	-0.0174062	-0.00656445	0.0218391	-0.0425617	-0.0333833	0.0184435	-0.0172476	-0.0263899	-0.0223129	0.0308436	0.0416292	0.0320058	-0.00467065	0.0123026	-0.00861517	0.00422675	-0.0125367
H0351.2001	supramarginal gyrus, Left, superior bank of gyrus	0.0131847	0.00719225	0.00432635	-0.00265143	0.0130089	-0.0148169	0.00910401	-0.0015728	-0.00165471	0.0149318	0.0280572	0.00676972	0.00401338	0.00274302	0.0350595	-0.0337289	-0.0458446	-0.0389026	-0.00615774
H0351.2001	middle temporal gyrus, Left, superior bank of gyrus	0.026629	0.0195821	0.0165473	0.0082381	0.0146621	0.0151044	-0.00671578	0.0117672	-0.0107458	0.0161837	0.0221011	-0.0129829	0.0233223	0.00865481	-0.0558443	-0.064726	-0.0590277	-0.0575277	-0.00466185
H0351.2001	middle temporal gyrus, Left, inferior bank of gyrus	-0.0120274	-0.00613619	-0.0190507	0.00209092	-0.00152212	-0.0295983	-0.0343215	0.0114233	-0.0290784	-0.0149174	-0.0264675	-0.011506	0.0334399	0.00343679	0.0374944	0.0442961	0.0260406	0.0358782	-0.0266682
H0351.2001	inferior temporal gyrus, Left, bank of mts	0.000692405	0.0268258	-0.00484835	0.0162867	-0.0393028	-0.0178138	-0.0269506	-0.0231168	-0.0332551	-0.00696928	-0.030221	-0.0201844	-0.00134275	0.00552608	0.00913473	-0.0018922	0.01753	0.0176113	-0.0116154
H0351.2001	supramarginal gyrus, Left, inferior bank of gyrus	0.0137393	0.00989581	0.0245952	0.014236	0.0138392	0.000890601	-0.0386138	-0.0155512	-0.0125901	-0.017355	-0.00154557	-0.0136211	0.016394	-0.00647066	-0.0268924	-0.0175618	0.00277757	-0.016939	-0.0165656
H0351.2001	inferior temporal gyrus, Left, bank of the its	-0.00950846	0.014379	-0.0406976	-0.0074347	-0.0603455	-0.0479003	-0.0426346	-0.0264371	-0.0403551	-0.0390048	-0.0708288	0.000290682	-0.016754	0.00812797	0.053326	0.0581708	0.0333606	0.0601776	-0.0303643
H0351.2001	lingual gyrus, Right, peristriate	0.0162839	0.031295	-0.0735521	-0.029845	-0.0752674	-0.0415934	-0.0235519	-0.013621	-0.0433104	0.0180305	-0.0651064	-0.0155124	0.0166812	0.0278529	0.0442051	0.0784257	0.0260911	0.0754292	-0.011492
H0351.2001	lingual gyrus, Right, striate	0.0187497	0.0456242	-0.104483	-0.0617529	-0.0654827	-0.0624354	0.018498	0.0311017	-0.0468536	0.0534647	-0.0384875	0.03821	0.0570991	0.0831708	-0.00246968	0.0277967	-0.0488286	0.0247856	-0.00836036
H0351.2001	occipito-temporal gyrus, Right, superior bank of gyrus	0.0201176	0.0242412	-0.0210041	-0.00697636	-0.0380438	-0.0187932	-0.0330025	-0.0113227	-0.0253118	0.0177377	-0.0224294	-0.0117123	-0.00418533	0.00713246	-6.97363e-05	0.016191	0.0247552	0.037966	0.00578006
H0351.2001	occipito-temporal gyrus, Right, inferior bank of gyrus	0.00601541	0.0165844	-0.00960877	-0.00459839	-0.0134523	-0.00512106	-0.0176146	-0.0223975	-0.0348316	-0.00896597	-0.0413696	0.0120778	0.0207339	0.0154775	-0.0111987	0.0123713	0.0157434	0.025348	-0.0234836
H0351.2001	superior temporal gyrus, Right, inferior bank of gyrus	-0.00280276	-0.00358736	0.0447449	0.0230974	0.0173375	0.0119454	-0.0192232	-0.0385689	0.00849202	-0.00348203	0.0308831	-0.0436542	-0.017507	-0.0547135	0.0477683	0.0100655	0.0485918	0.00791385	-0.0190851
H0351.2001	middle temporal gyrus, Right, superior bank of gyrus	-0.0145651	0.000292847	-0.062788	-0.0443517	0.0338627	-0.0418898	0.0313045	0.0419089	-0.0521911	-0.0168955	-0.0455791	0.0459864	0.120787	0.0753357	-0.0152551	0.0135249	-0.00683069	0.0363488	-0.0534785
H0351.2001	middle temporal gyrus, Right, inferior bank of gyrus	0.017805	0.0188598	0.0102637	0.0122692	0.00757885	0.00188418	-0.0308426	0.00917486	-0.0144384	0.0170959	-0.00185332	0.015678	0.00236155	0.0137341	-0.0237827	-0.0157281	-0.0319563	-0.0208983	0.00399952
H0351.2001	Long Insular Gyri, Right	-0.00481426	0.00368581	-0.00162348	0.00393032	-0.00979873	-0.0187377	-0.0252112	-0.0107717	-0.0219305	-0.0187908	-0.0244455	-0.0110001	0.0166656	0.00461736	-0.00644119	0.0094231	0.0183851	0.0207234	-0.0264487
H0351.2001	paracentral lobule, anterior part, Left, inferior bank of gyrus	-0.0085172	0.00795293	-0.02599	-0.00394718	-0.0540945	0.0158887	0.00785396	-0.0124889	-0.0428526	0.00967648	-0.0482777	-0.0294895	-0.0292044	0.00318152	-0.0237109	-0.0108294	0.0273279	0.0521348	-0.00965227
H0351.2001	precuneus, Right, superior lateral bank of gyrus	-0.0120916	0.00741335	-0.0352128	-0.00685364	-0.0329983	-0.0194395	-0.000154557	-0.00923874	-0.0324681	-0.0027053	-0.0306941	-0.00834833	0.00709287	0.00228252	0.0454453	0.0529894	0.0270591	0.0456324	-0.00667725
H0351.2001	precuneus, Right, inferior lateral bank of gyrus	-0.00791438	0.0216516	-0.023163	0.00705185	-0.0440411	-0.0124122	-0.0079072	-0.0203681	-0.0369512	0.0113855	-0.032398	-0.00997851	-0.00537618	0.0157223	-0.00860129	-0.00183788	0.0115023	0.0259147	-0.00620848
H0351.2001	Cingulate gyrus, parietal part, Right, inferior bank of gyrus	-0.00483563	0.029056	-0.100616	-0.0438668	-0.0410589	-0.0720609	0.0363772	0.0722606	-0.0268465	0.0578471	0.00954552	0.0323367	0.0477981	0.0785721	0.0180514	0.0456508	-0.0704485	0.00141307	0.00642463
H0351.2001	precentral gyrus, Left, superior lateral aspect of gyrus	0.0480658	-0.0179864	0.0167377	-0.0370089	-0.0300789	0.0276194	0.00111796	-0.0228139	-0.00714428	-0.02462	-0.0137696	-0.0622376	-0.0346136	-0.0588211	0.0376227	0.0123655	0.0556885	0.0283684	-0.0243077
H0351.2001	precentral gyrus, Left, inferior lateral aspect of gyrus	0.0587637	0.0100898	-0.00893974	-0.0366204	-0.0249235	0.014734	0.0188988	0.0314197	-0.0237756	0.0113045	0.00898424	-0.0215906	0.00676223	-0.00597333	-0.00674177	-0.0110621	0.0179097	0.00665037	-0.0100164
H0351.2001	precentral gyrus, Left, bank of the central sulcus	0.0324903	0.0233628	-0.0587025	-0.0378685	-0.0200655	-0.0251092	0.00755569	0.0656797	-0.0471086	0.0432074	-0.0348785	0.0410153	-0.00161489	0.0512514	-0.00502359	0.0136052	-0.0554165	9.56646e-05	-0.0169799
H0351.2001	post central gyrus, Left, bank of the central sulcus	0.036456	-0.00619739	-0.00524382	-0.0433515	0.0326769	0.0253485	0.0591291	0.0275623	0.00820828	0.0711522	0.0715565	-0.021694	0.0179126	-0.0105535	0.00925485	0.0209678	0.00486207	0.00121999	-0.0251396
H0351.2001	post central gyrus, Left, superior lateral aspect of gyrus	0.0415496	0.00446516	-0.00719373	-0.0324496	-0.0357814	0.0151724	-0.00277732	-0.0213149	-0.0180512	0.00478102	-0.0124921	-0.0348328	-0.00459939	-0.0284972	0.0143942	0.0115288	0.0380853	0.0311233	-0.018898
H0351.2001	precentral gyrus, Right, superior lateral aspect of gyrus	0.0563535	0.0093353	-0.00428707	-0.0454061	-0.0338984	0.00492986	0.00797769	-0.0191613	-0.0245378	-0.0190337	-0.0246965	-0.0138552	-0.0129773	-0.0129643	0.0187141	0.0192704	0.0368425	0.0298007	-0.00638714
H0351.2001	precentral gyrus, Right, bank of the central sulcus	0.0513664	0.009761	0.000475085	-0.0323578	-0.0120656	0.0361756	0.0475961	0.0307282	-0.0096206	0.0423066	0.0417985	-0.0244726	-0.0347341	-0.000890382	-0.0316486	-0.072323	-0.0558039	-0.0561866	-0.0136589
H0351.2001	paracentral lobule, anterior part, Right, superior bank of gyrus	0.0261816	-0.0162304	-0.0307204	-0.0478093	-0.0181407	0.00777138	0.0274553	0.0222449	-0.030512	0.000293691	-0.0209248	-0.0263548	0.0153068	-0.00318101	0.0499297	0.0362218	0.0404917	0.0531752	-0.0310513
H0351.2001	paracentral lobule, anterior part, Right, inferior bank of gyrus	0.0316711	0.0455244	-0.0532639	-0.0349981	-0.0456736	-0.0470799	0.00553409	0.00665249	-0.0594262	-0.00978583	-0.0667247	0.0457168	0.0235157	0.0676052	0.00957775	0.0235484	-0.0238861	0.0135894	-0.0270764
H0351.2001	post central gyrus, Right, superior lateral aspect of gyrus	0.0452979	0.00902402	0.0216097	-0.0220939	-0.00603522	0.0313267	-0.00333623	-0.0395447	-0.00393705	0.0169705	0.0222868	9.31317e-05	-0.0372718	-0.0295219	-0.00875928	-0.0337446	0.00697657	-0.0114238	-4.59957e-05
H0351.2001	Cingulate gyrus, parietal part, Right, superior bank of gyrus	-0.00837194	0.0211365	-0.0169015	0.00706549	-0.0245432	-0.0167758	-0.0212472	-0.0102481	-0.0376999	-0.00929661	-0.0321266	0.0227302	-0.0133333	0.0187845	-0.00274338	-0.0247859	-0.00574775	0.00389913	-0.00467277
H0351.2001	post central gyrus, Right, bank of the posterior central sulcus	0.00322544	0.0198544	-0.0470428	-0.020955	-0.0245547	-0.0576219	-0.0168411	0.00855446	-0.0313283	-0.0164366	-0.0476751	-0.00284972	0.0459225	0.0372864	0.0356953	0.0539087	0.018481	0.049713	-0.0224911
H0351.2001	supramarginal gyrus, Right, inferior bank of gyrus	-0.00149821	0.0132957	-0.0333099	-0.0158126	-0.0160916	-0.0381014	0.00575017	-0.0179145	-0.0351109	-0.0157732	-0.0307854	0.00291484	0.0704453	0.0275127	0.0328097	0.0360321	0.0192961	0.0405543	-0.0315923
H0351.2001	supramarginal gyrus, Right, superior bank of gyrus	0.00621777	0.00995689	-0.0429818	-0.0246462	-0.00743866	-0.0398343	-0.000309911	0.0187348	-0.033626	-0.00730569	-0.0396779	-0.00685721	0.0523487	0.0348225	0.012848	0.0342907	0.0193413	0.046845	-0.0253285
H0351.2001	gyrus rectus, Right	-0.00848712	0.0189613	-0.0123261	0.000345577	-0.0319655	-0.0433944	-0.0436911	-0.0426359	-0.0257184	-0.0409112	-0.0509384	0.00373482	-0.0116263	0.010801	0.0321847	0.0394366	0.0269497	0.0389801	-0.0118938
H0351.2001	precuneus, Left, , inferior lateral bank of gyrus	0.0141941	0.0212388	0.00398111	0.0157998	-0.0134868	-0.00547406	-0.0223842	0.0295282	-0.00385762	0.029618	0.0228088	-0.0178958	-0.0265264	0.0020383	-0.05199	-0.0486613	-0.0691753	-0.0580078	0.00839027
H0351.2001	medial orbital gyrus, Left	-0.0238173	-0.00752565	0.0257609	0.0331303	0.0181928	0.00733782	-0.0228509	0.00473255	0.0105011	0.00662434	0.0307774	-0.000248851	-0.0340321	-0.0150581	-0.0467864	-0.0678432	-0.0610835	-0.0668624	0.0236469
H0351.2001	paracentral lobule, anterior part, Left, superior bank of gyrus	0.030231	0.0193997	-0.00801282	-0.0237471	-0.0210426	0.00595788	0.0279728	-0.00888898	-0.0313057	-0.00168877	-0.00994145	0.0191655	-0.0187497	0.0151561	-0.00233213	-0.0184883	-0.0304866	-0.0195172	-0.0310573
H0351.2001	superior frontal gyrus, Left, medial bank of gyrus	-0.0185974	-0.0512587	0.0309378	0.00544541	0.0117098	0.00972516	-0.0332193	-0.0106032	0.0209168	-0.0317827	0.00468781	-0.0477532	-0.0356946	-0.0797573	0.0461328	0.0224137	0.056085	0.00885489	0.0152693
H0351.2001	precuneus, Left, , superior lateral bank of gyrus	0.00792957	0.0200579	0.0100232	0.0168505	-0.0100872	-0.0091265	-0.0257038	-7.05039e-05	-0.00774456	0.010114	0.0139211	-0.0269199	-0.00597432	-0.00398092	-0.0275389	-0.0123441	-0.0336768	-0.0287751	0.010059
H0351.2001	lingual gyrus, Left, peristriate	0.0090012	0.0185632	-0.0378178	-0.00880559	-0.0404342	-0.00989489	-0.0277	-0.00339559	-0.0588397	0.00147731	-0.0606884	0.00273462	0.00392741	0.0137065	0.0362272	0.0295628	0.0225462	0.050259	-0.0298494
H0351.2001	occipito-temporal gyrus, Left, inferior bank of gyrus	0.0111723	0.0159475	-0.00503724	0.00212639	-0.006291	-0.00618151	-0.0178804	0.000457935	-0.02139	0.00957102	0.0026628	0.00467418	0.00544115	0.00208426	-0.0112767	-0.018944	-0.00676196	-0.00158179	-0.014198
H0351.2001	lingual gyrus, Left, striate	0.0327561	0.068465	-0.111095	-0.0663111	-0.0647833	-0.0863947	0.0171272	0.0530259	-0.0453962	0.0785285	-0.0213607	0.0440899	0.0609906	0.101487	-0.00161203	0.0390587	-0.0682735	-0.0152653	-0.00244986
H0351.2001	lingual gyrus, Left, striate	0.0318116	0.0488804	-0.111537	-0.0640592	-0.0789283	-0.0603043	0.031492	0.0551023	-0.0218766	0.0932554	-0.00594239	0.0113286	0.0614243	0.0853827	0.0007304	0.0264394	-0.0613423	0.0356802	0.0251566
H0351.2001	angular gyrus, Right, superior bank of gyrus	0.0139942	-0.00170369	0.0263565	-0.0112642	0.00955256	0.0217644	-0.00337245	-0.0331563	0.00119983	-0.0181516	0.0109316	0.0054632	-0.020108	-0.0312491	-0.0160775	-0.0235288	0.00419959	-0.0163226	-0.0122237
H0351.2001	superior frontal gyrus, Left, lateral bank of gyrus	-0.0116842	0.00233654	-0.00923889	-0.001815	-0.00575639	-0.0245465	-0.00883581	-0.0215452	-0.0297299	-0.0267575	-0.034059	0.0404316	-0.00217699	0.0162683	0.00977969	0.00869329	-0.018387	-0.00571363	-0.0105838
H0351.2001	gyrus rectus, Right	-0.0513322	-0.0448224	0.0189088	0.0179698	0.016612	0.00148719	-0.0199724	-0.0322287	-0.00853249	-0.043546	-0.0194263	-0.0152727	-0.0275293	-0.0428942	0.0596372	0.0351468	0.0522309	0.0269325	-0.0260937
H0351.2001	temporal pole, Right, inferior aspect	-0.0420162	-0.0254766	0.0316653	0.0254499	0.0277091	0.00475864	-0.00661917	-0.0303449	0.010725	-0.0316077	0.011447	-0.0028262	-0.0229575	-0.0285046	-0.0103424	-0.0104829	-0.00400797	-0.0317884	0.000468471
H0351.2001	temporal pole, Left, medial aspect	-0.0556485	-0.0244155	0.0207529	0.030101	0.0404257	-0.0103547	-0.00724522	-0.0100739	-0.00104472	-0.0362245	-0.000898635	0.00576662	0.0145843	0.000438985	-0.0224718	0.00580053	-0.018811	-0.0291657	0.00560013
H0351.2001	superior frontal gyrus, Right, lateral bank of gyrus	-0.0490414	-0.0623019	-0.0132114	-0.0476545	0.0118683	0.0712976	0.100519	-0.0331709	-0.000244651	0.0233645	0.0344845	-0.000830629	-0.0321414	-0.027463	0.0253531	0.0104943	0.0302906	0.0301716	-0.0229923
H0351.2001	inferior frontal gyrus, orbital part, Right	0.00256691	-0.0169811	0.0203143	-0.00779924	0.0231954	0.035475	0.0370501	-0.0107116	-0.000134006	0.00613308	0.0265651	0.0161464	-0.0297449	-0.0219201	-0.011726	-0.0128115	-0.0304942	-0.0388934	-0.00868433
H0351.2001	Inferior frontal gyrus, triangular part, Left	0.0171594	-0.00187141	0.0495485	0.0245571	0.00530103	0.0218686	-0.0298651	-0.0173426	0.0126982	-0.00209989	0.0274435	-0.0498652	-0.0485785	-0.0452242	-0.0377162	-0.0484137	-0.0222848	-0.0546471	0.0176435
H0351.2001	supramarginal gyrus, Right, superior bank of gyrus	0.014212	0.025838	-0.0278946	-0.0146346	-0.000646203	-0.0339458	0.0127781	0.0186355	-0.0170828	0.00583201	-0.0075673	0.00949464	0.0474711	0.0436487	-0.0244331	-0.00933164	-0.0274991	0.000422181	-0.00147356
H0351.2001	middle temporal gyrus, Right, inferior bank of gyrus	0.0056099	-0.00103347	-0.00107936	-0.0089828	-0.0162931	-0.0087657	-0.0316772	-0.0225551	-0.0244038	-0.0329823	-0.0373717	-0.0116474	0.000545375	-0.0148943	0.0416805	0.0403864	0.0395782	0.0395422	-0.0319667
H0351.2001	middle temporal gyrus, Left, inferior bank of gyrus	-0.00760967	0.00494169	0.0131638	0.011385	-0.0153193	-0.00215228	-0.0328304	-0.0440459	-0.0221774	-0.0357692	-0.0318164	-0.00553194	0.00761473	-0.0139921	0.00725389	-0.00846265	0.0323692	0.0198495	-0.0147825
H0351.2001	middle frontal gyrus, Right, superior bank of gyrus	0.00258326	0.00764089	0.0129847	-0.00193749	-0.0149372	0.0318005	0.00795224	-0.0307234	-0.0237692	-0.0247163	-0.0303627	-0.00368342	-0.0116814	-0.00992439	-0.0160022	-0.015169	0.00644227	0.00586891	-0.00551048
H0351.2001	middle frontal gyrus, Right, inferior bank of gyrus	0.0229017	0.0161126	0.00401289	-0.00466004	-0.0285191	-0.00836108	-0.0211885	-0.0304492	-0.0231498	-0.0184496	-0.0257032	-0.0200317	-0.0234862	-0.00777228	0.00855466	-0.00874724	0.0228495	0.0189257	-0.0112022
H0351.2001	superior frontal gyrus, Right, lateral bank of gyrus	-0.00368744	-0.0058179	0.0200342	-0.00206903	-0.0108187	0.00660782	-0.00962131	-0.0164714	0.000623288	-0.0169641	0.0111148	-0.0305412	-0.0292666	-0.0305814	-0.0212796	-0.0207583	0.000559345	-0.012337	-0.0193058
H0351.2001	middle frontal gyrus, Left, inferior bank of gyrus	-0.0120097	-0.0197285	0.0153238	0.00159468	0.025573	0.0240258	0.0341405	0.00643498	0.000742647	0.0278333	0.0283903	-0.0141	-0.00577683	-0.0178646	-0.0211417	-0.0205392	-0.00721952	-0.0132711	-0.0104711
H0351.2001	Inferior frontal gyrus, triangular part, Left	-0.0255596	-0.0569059	0.0121558	-0.0168327	-0.022024	0.0119299	-0.0130374	-0.0178987	0.0134542	-0.0363818	0.0104578	-0.074206	-0.0508609	-0.0861686	0.000671074	0.0521276	0.0749181	0.0485936	-0.00500381
H0351.2001	lateral orbital gyrus, Left	-0.00865768	-0.000789376	-0.024937	-0.0208278	-0.0188692	-0.0258715	0.00950635	-0.00754127	-0.0167164	-0.0191114	-0.00240935	0.0350166	-0.0304799	-0.000512431	0.034666	0.0372329	-0.011553	-0.0073678	-0.0066219
H0351.2001	gyrus rectus, Right	-0.0246895	-0.0136774	0.0254368	0.0235597	0.0266054	0.00296664	-0.0315944	-0.0126637	-0.00183824	-0.0122851	0.012899	-0.0113766	-0.0179544	-0.0218728	0.0209416	-0.0213963	0.00795585	-0.0162695	-0.0148954
H0351.2001	medial orbital gyrus, Right	-0.0240556	-0.00897848	0.0289183	0.0263766	0.0304436	0.000698912	-0.0250417	-0.0193714	-0.00522665	-0.00847965	0.0141984	0.0119722	-0.0201092	-0.0196245	0.0401762	-0.0209002	-0.00297334	-0.0301961	-0.00317943
H0351.2001	Cingulate gyrus, frontal part, Right, inferior bank of gyrus	-0.0456183	-0.0452966	0.00720091	0.00284216	-9.19601e-05	0.0207416	-0.0220624	-0.0239098	-0.00325833	-0.0285151	-0.0274524	-0.0378476	-0.0297142	-0.0373917	0.00611162	0.0267894	0.0886425	0.0773027	-0.0144319
H0351.2001	Inferior frontal gyrus, triangular part, Right	-0.0233996	-0.0265132	0.00182609	-0.00751263	0.0176472	-0.0104584	0.0174422	-0.00920501	0.00993174	-0.0207287	0.0180699	0.00518549	-0.0160225	-0.0229238	0.0597749	0.0676976	0.036892	0.0174793	-0.000722082
H0351.2001	inferior frontal gyrus, orbital part, Right	-0.00140543	-0.0105283	-0.00960444	-0.0197341	-0.000835223	0.00584708	0.0282471	0.00463352	-0.00343118	0.00382909	0.0171926	0.00907844	-0.022786	-0.0151503	0.0223216	0.0170997	-0.00333061	0.000167543	-5.96642e-05
H0351.2001	temporal pole, Right, inferior aspect	-0.0529424	-0.0338597	0.0405485	0.0349658	0.0480688	0.0260502	0.00563337	-0.00405287	0.0130503	-0.0027264	0.0338016	-0.0208782	-0.0188484	-0.0340574	-0.0178005	-0.051672	-0.00664641	-0.0385324	-0.00526344
H0351.2001	superior frontal gyrus, Left, lateral bank of gyrus	0.00288098	0.0110957	0.00495689	0.0134835	-0.0118803	-0.00774023	-0.0204372	0.00158176	-0.0120714	0.00169546	-0.0023252	-0.00416416	-0.00803852	0.00483811	-0.00251706	-0.0202561	-0.0110596	-0.00869033	-0.010389
H0351.2001	superior frontal gyrus, Right, medial bank of gyrus	-0.0234254	-0.00867384	0.016174	0.0172682	0.0184246	-0.00868776	-0.0273436	0.00381096	-0.0165012	-0.0307158	-0.01008	0.013389	0.00640593	-0.0107282	0.0231264	-0.0174877	0.00740487	-0.0144403	-0.0296375
H0351.2001	superior frontal gyrus, Right, lateral bank of gyrus	0.00725963	0.0290516	-0.00341454	0.0249825	-0.0215041	0.014724	-0.0138235	0.0106528	-0.0761377	-0.0080336	-0.0876717	0.000528212	0.0244712	0.0259361	-0.0988177	-0.0175769	-0.0271573	-0.0217958	-0.000869487
H0351.2001	lingual gyrus, Right, peristriate	0.0325087	0.0522225	-0.0473062	-0.0273231	-0.053996	-0.0214642	-0.000820299	-0.0239801	-0.0445074	0.0193944	-0.0502157	0.0393977	0.000148271	0.0541815	0.000440781	-0.0155368	-0.0269299	0.0248562	-0.00513033
H0351.2001	precuneus, Left, , inferior lateral bank of gyrus	0.0310718	-0.0358816	0.0480928	0.0216125	0.0219901	0.0869504	0.00748003	0.072289	0.0108831	0.0936543	0.0680337	-0.126392	-0.0238689	-0.0860391	-0.0579951	-0.0547262	-0.00805406	-0.0824727	-0.0121111
H0351.2001	paracentral lobule, posterior part, Right, bank of cingulate sulcus	0.00370704	0.0177926	-0.0132896	0.000158582	-0.0124198	-0.0248063	-0.0257324	0.00880688	-0.024531	-0.00955454	-0.0165988	0.00849078	0.0337972	0.0185557	-0.00620153	-0.0106973	-0.00731291	0.00342141	-0.0263934
H0351.2001	cuneus, Left, peristriate	0.0260139	0.0350797	-0.053132	-0.0409099	-0.0698469	-0.0433398	-0.00122613	-0.00991507	-0.0217267	5.74051e-05	-0.00913806	0.0103376	0.0212562	0.024462	-0.00815715	0.00886899	-0.0397367	0.00296476	0.00736552
H0351.2001	gyrus rectus, Left	-0.0458361	-0.052835	0.0452916	0.0160388	0.0261156	0.02919	0.00440851	-0.0125898	0.042001	-0.00147252	0.064062	-0.0715924	-0.0465757	-0.0740515	-0.0521316	-0.0420661	-0.00409662	-0.0568405	0.000199546
H0351.2001	Cingulate gyrus, frontal part, Left, inferior bank of gyrus	-0.0340253	-0.0108052	0.00932724	0.0267582	0.0325323	-0.00829172	-0.0195865	0.00702929	-0.0145776	0.00247137	-0.0122773	0.00231335	0.0100464	0.00562524	-0.0261409	-0.0123556	-0.00666359	-0.0101719	0.00235916
H0351.2001	superior frontal gyrus, Left, medial bank of gyrus	-0.056634	-0.0620205	0.00275877	-0.0110479	0.00707204	0.00263857	-0.00310279	-0.0186503	-0.000432872	-0.0589185	-0.00338751	-0.0225253	-0.0514877	-0.0555102	0.0222319	0.0756092	0.079627	0.0490087	-0.00613146
H0351.2001	lingual gyrus, Left, peristriate	0.0466339	0.0451052	-0.0539244	-0.0165999	-0.053112	-0.0348066	-0.00495013	0.0148236	-0.00366186	0.0735072	-0.00804859	0.00349741	0.0148395	0.0445395	0.00905429	0.0122016	-0.0447664	0.00767051	0.0318569
H0351.2001	angular gyrus, Right, superior bank of gyrus	0.00948287	0.00648253	0.00570759	-0.0121301	0.00595673	-1.77578e-05	0.00963582	-0.0236555	-0.0117904	-0.0169937	-0.0104861	0.00834539	-0.00769996	-0.00390054	0.00816566	-0.00307331	-0.00070084	-0.00597924	-0.0161654
H0351.2001	angular gyrus, Right, inferior bank of gyrus	-0.0137668	0.0130333	-0.0134155	0.00349534	0.0126684	-0.037179	-0.0223893	-0.00334029	-0.0304987	-0.045698	-0.0453426	0.0416617	0.0581866	0.0443934	-0.0100666	-0.0239734	-0.0203251	0.000922374	0.00404179
H0351.2001	middle frontal gyrus, Right, superior bank of gyrus	0.00331088	0.00662345	0.0100882	0.00560235	-0.0127689	-0.00938315	0.0003606	-0.016298	-0.00317552	-0.00987707	0.0105056	-0.0151142	-0.0175051	-0.0170557	-0.000410516	-0.00493282	-0.0079013	-0.021658	0.00233703
H0351.2001	superior frontal gyrus, Right, medial bank of gyrus	-0.0270484	-0.00660148	-0.00262652	0.0120342	0.0169012	-0.0136701	-0.0170865	0.00482257	-0.0264944	-0.027846	-0.0328493	0.0212909	0.0156036	0.016715	0.0103455	-0.0033321	0.00241018	0.0048834	-0.0219265
H0351.2001	paracentral lobule, anterior part, Left, superior bank of gyrus	0.0294832	0.0193486	-0.0344979	-0.033684	-0.0246071	-0.0064055	0.0368989	0.00396359	-0.0317584	-0.00363333	-0.0361445	0.0238516	0.0189293	0.0418598	-0.0136633	-0.0102239	-0.0267181	0.0184132	-0.0130782
H0351.2001	paracentral lobule, posterior part, Right, lateral bank of gyrus	0.0118144	0.0116413	-0.000168658	-0.00592421	0.00317073	-0.0101413	-0.0309174	-0.029416	-0.0226688	-0.0178993	-0.0187262	0.0143831	0.0422891	0.0154392	0.0068981	-0.00842084	0.00344132	0.0155582	-0.0139306
H0351.2001	paracentral lobule, posterior part, Right, lateral bank of gyrus	0.0187603	0.0185127	0.00521844	-0.00459636	-0.0124002	0.0125244	0.00694227	-0.0134076	-0.0248455	-0.00104589	-0.00269544	-0.00700441	0.0182403	0.00886283	-0.037279	-0.0456675	-0.01202	-0.0111607	-0.0173418
H0351.2001	inferior temporal gyrus, Left, bank of the its	0.00869709	0.0157978	0.039183	0.0213361	0.0075832	0.0215751	-0.0188112	-0.0082618	0.00896536	0.0243137	0.0399057	-0.00916264	-0.0496754	-0.0199255	-0.0445897	-0.0676945	-0.0615338	-0.0757984	0.0115745
H0351.2001	occipito-temporal gyrus, Right, superior bank of gyrus	0.00944991	0.0152399	-0.0118548	-0.0166847	-0.0400599	-0.0341448	-0.0342222	-0.0250359	-0.0072116	-0.0179581	-0.018442	-0.0128141	-0.00533761	-0.00981198	0.0268098	0.0277426	0.0212265	0.0308987	-0.00147462
H0351.2001	occipito-temporal gyrus, Left, inferior bank of gyrus	0.0114656	0.00962269	0.0277219	0.00377425	0.00274867	0.0240604	0.00389932	-0.00826413	0.00651592	0.0204161	0.0395838	-0.0225132	-0.0158219	-0.0213345	-0.0460464	-0.060851	-0.0270651	-0.0432483	0.00723352
H0351.2001	inferior temporal gyrus, Right, bank of the its	0.00617035	0.00761721	0.020257	-0.00208933	-0.0194114	-0.00628755	-0.0332777	-0.0204331	0.00976036	-0.0136066	0.012781	-0.0127501	-0.0272732	-0.0401749	0.0338254	-0.0160229	0.00602528	-0.0121608	0.00477283
H0351.2001	occipito-temporal gyrus, Right, inferior bank of gyrus	0.0238105	0.0146236	0.0274861	0.00251282	0.00340847	0.0308433	-0.00428367	0.00739303	0.00319658	0.0376786	0.0365876	-0.0120677	-0.0384019	-0.0175675	-0.0430759	-0.0710735	-0.0405363	-0.0471929	0.0103618
H0351.2001	superior temporal gyrus, Right, lateral bank of gyrus	0.000245457	0.000618262	-0.000352651	-0.018878	-0.0303546	-0.029887	-0.0426284	-0.0556118	-0.0205545	-0.0527386	-0.0363674	-0.0267589	0.047915	-0.0384481	0.046886	0.0467353	0.0494465	0.0438242	-0.0383874
H0351.2001	middle temporal gyrus, Right, superior bank of gyrus	0.0178229	0.0109847	0.0329668	0.000595589	-0.00315517	0.0189538	0.00750262	-0.0248662	0.0129526	0.0301676	0.0472549	-0.0178854	-0.0476635	-0.0236927	-0.041419	-0.057803	-0.0477748	-0.0622539	0.0124498
H0351.2001	middle temporal gyrus, Right, inferior bank of gyrus	0.00771737	0.00351567	-0.0073488	-0.0219668	-0.0253675	-0.0182481	-0.0174749	-0.0270314	-0.021566	-0.0231989	-0.0262369	-0.0215614	0.00911154	-0.015622	0.0223555	0.0224223	0.037643	0.0376205	-0.0127174
H0351.2001	inferior temporal gyrus, Right, lateral bank of gyrus	0.000984676	0.00433523	0.00855558	-0.0103533	-0.00373289	-0.0121485	-0.0189962	-0.030982	-0.00286997	-0.0201943	-0.0153129	-0.0199325	-0.0036247	-0.0167771	-0.00482537	0.0187592	0.0301296	0.0205199	0.00057892
H0351.2001	inferior temporal gyrus, Right, bank of mts	0.0169033	0.0196223	-0.00716049	-0.00899162	-0.028725	0.00952531	-0.00594139	-0.0010025	-0.0217912	0.0149229	-0.0193259	-0.00264296	0.00653232	0.00492819	-0.0281097	-0.00822311	0.0061377	0.0183628	-0.00288388
H0351.2001	post central gyrus, Left, inferior lateral aspect of gyrus	0.0413466	0.0465206	-0.0363255	-0.0431871	-0.0464891	-0.0375103	-0.00530765	-0.0349024	-0.0449647	-0.0144386	-0.0534046	0.00787406	0.00993189	0.0375001	0.00675533	0.0207373	0.00905133	0.0414324	-0.0425965
H0351.2001	post central gyrus, Left, bank of the posterior central sulcus	0.0528215	0.0174845	0.0255016	-0.0236294	-0.00985028	0.05997	0.0189081	-0.00520495	0.00145942	0.0381164	0.0260733	-0.0319893	-0.0398948	-0.0264619	-0.0505599	-0.0502214	-0.00112439	-0.0187892	0.0122646
H0351.2001	supramarginal gyrus, Left, superior bank of gyrus	0.0040225	-0.00700556	0.00181648	-0.0333446	-0.0146408	0.0172854	0.0167412	-0.0360393	-0.00459541	-0.0134666	-0.0110314	-0.0306421	-0.00833819	-0.0338205	-0.0114432	0.0132276	0.04449	0.0363141	-0.0198241
H0351.2001	supramarginal gyrus, Left, inferior bank of gyrus	0.0189708	0.0177312	0.0286659	-0.000732268	-0.0107606	9.1762e-05	-0.0342953	-0.0331957	-0.00104419	0.00148849	0.0121184	-0.0158665	-0.0444666	-0.0209547	-0.00133208	-0.0287064	0.00305621	-0.0208223	-0.00492667
H0351.2001	precentral gyrus, Left, superior lateral aspect of gyrus	0.031737	0.0150614	0.00410874	-0.0294743	-0.0272609	0.0070162	0.0162592	-0.0119835	-0.0181409	-0.00774676	-0.00517038	-0.0227791	-0.000262625	-0.0062149	-0.0157756	-0.00837114	0.0190417	0.00933619	-0.0158668
H0351.2001	precentral gyrus, Left, inferior lateral aspect of gyrus	0.0455918	0.0174033	0.0283117	-0.0226417	-0.00355107	0.0191796	0.0145407	-0.00358327	0.00123521	0.00628833	0.0337014	-0.0192095	-0.0293278	-0.0233604	-0.0156525	-0.0347334	-0.00879857	-0.0387965	-0.00779897
H0351.2001	precentral gyrus, Left, bank of the central sulcus	0.0448469	0.0214849	-0.00435027	-0.0468639	-0.0211596	0.043139	0.0655236	0.0173808	-0.00489052	0.0482808	0.0399326	-0.0156622	-0.0392738	0.00113945	-0.0407674	-0.0324365	-0.0333634	-0.0270862	-0.00791537
H0351.2001	post central gyrus, Left, bank of the central sulcus	0.0470336	0.0246069	-0.0502656	-0.0576519	-0.069919	-0.0173439	-0.00609668	0.00588514	-0.0116003	0.0368189	-0.0104593	-0.0315812	-0.00574564	-0.00383352	0.0193194	0.032329	0.0256943	0.0511879	0.0111302
H0351.2001	post central gyrus, Left, superior lateral aspect of gyrus	0.0533586	0.0124972	0.0145609	-0.0311266	-0.0322855	0.0242781	-0.0164482	-0.030986	0.007155	0.0331974	0.0213784	-0.0456887	-0.0301722	-0.0519733	0.00168457	-0.000610849	0.0284206	0.0111234	0.00691503
H0351.2001	paracentral lobule, anterior part, Right, superior bank of gyrus	0.047315	0.0293868	0.00400675	-0.0283721	-0.00911378	-0.00556635	0.0238831	0.00965653	-0.000809009	0.0191736	0.0305769	0.00997984	-0.0191495	0.0157016	-0.0116856	-0.0267922	-0.0597654	-0.0524529	0.0119182
H0351.2001	paracentral lobule, anterior part, Right, inferior bank of gyrus	0.0308233	0.0217026	0.037191	0.0149338	0.000287977	0.0222147	-0.00647541	0.00213649	-0.0108445	0.0266936	0.0374934	-0.044019	-0.00626203	-0.0290905	-0.0182372	-0.0397756	0.0112408	-0.015891	-0.0260753
H0351.2001	precentral gyrus, Right, superior lateral aspect of gyrus	0.0569526	0.0215071	0.025507	-0.0272172	-0.0261761	0.0145621	-0.00801068	-0.0142521	-0.000814168	-0.0019665	0.0115012	-0.0232288	-0.041483	-0.0340351	0.00476748	-0.0383573	0.00491484	-0.0188358	-0.00693666
H0351.2001	precentral gyrus, Right, inferior lateral aspect of gyrus	0.0556794	0.0108767	0.0248062	-0.0336325	-0.0409262	0.0596928	0.0104391	-0.0225677	-0.0225904	0.00438889	-0.0192538	-0.0713985	-0.036114	-0.0521142	-0.0323892	-0.0367504	0.0269197	0.00916987	-0.0124315
H0351.2001	precentral gyrus, Right, bank of the central sulcus	0.053873	0.0407283	-0.050552	-0.0537186	-0.0798923	0.0138596	0.0331185	0.0184964	-0.0555842	0.0439594	-0.0465384	-0.0340718	-0.00278967	0.0377159	-0.00282936	-0.0111829	-0.00829485	0.0315331	-0.0405709
H0351.2001	post central gyrus, Right, bank of the central sulcus	0.0349592	0.0100805	-0.0541147	-0.0786079	-0.049584	0.00952539	0.0585157	0.0102824	-0.0125877	0.0445102	0.00826569	-0.0203572	-0.000809523	-0.00214608	0.0329835	0.0431065	0.0130625	0.036547	0.00975039
H0351.2001	post central gyrus, Right, superior lateral aspect of gyrus	0.0428632	0.0121631	0.0106639	-0.0420679	-0.0334081	0.0282332	-0.00137333	-0.0511765	-0.0092188	0.00586384	-0.00404158	-0.0407869	-0.0353732	-0.0486243	-0.00749636	0.0088644	0.0444299	0.0322295	-0.0176396
H0351.2001	post central gyrus, Right, inferior lateral aspect of gyrus	0.0456933	0.0547322	-0.0103126	-0.024718	-0.0416512	-0.0206752	0.0123894	-0.0457692	-0.0189192	0.0275975	0.0103276	0.00262866	-0.0101565	0.0519289	-0.0340544	-0.0491563	-0.0449196	-0.0308243	-0.00886327
H0351.2001	post central gyrus, Right, bank of the posterior central sulcus	0.0261851	0.0135304	0.0203942	-0.0085252	-0.0230487	0.0133237	-0.0138395	-0.0252638	0.0064189	0.0172362	0.0243323	-0.0249536	-0.0512164	-0.0385659	-0.0171583	-0.016276	0.0109196	-0.00737269	0.00684993
H0351.2001	supramarginal gyrus, Right, inferior bank of gyrus	0.00718445	-0.00403562	0.0121098	-0.0139214	-0.0293844	0.0121613	-0.0186437	-0.0415422	-0.0119119	-0.0154918	-0.018868	-0.0404005	-0.0361129	-0.0511859	-0.0079846	0.0104201	0.0419194	0.0235613	-0.00490796
H0351.2001	lateral orbital gyrus, Right	-0.00179234	0.0203965	0.0234061	-0.00701839	0.0137876	0.0133806	-0.00976487	-0.0164413	-0.0320303	-0.101655	-0.048963	0.0374053	-0.0534296	-0.00953572	-0.0215098	-0.0560168	-0.0392819	-0.04539	0.00294211
H0351.2001	lingual gyrus, Right, striate	0.0522207	0.0585365	-0.0943916	-0.0801962	-0.0954038	-0.0199625	0.0258735	0.0596594	-0.0355461	0.124618	0.0172507	-0.0174769	-0.00501646	0.0787572	-0.0359537	-0.0346326	-0.0731612	0.00959541	-0.00385881
H0351.2001	parolfactory gyri, Left	-0.039752	-0.0346217	0.00450233	0.000913915	0.0263036	0.00271034	-0.0375853	-0.00642538	-0.0132253	-0.0362946	-0.0356456	-0.0188991	0.0384305	-0.0271077	0.000870895	0.0330197	0.0526879	0.0289383	-0.00926461
H0351.2001	middle temporal gyrus, Left, inferior bank of gyrus	-0.0136562	0.0037682	0.0152864	0.0200781	0.000927821	-0.0167755	-0.0375186	-0.00909156	-0.00302209	-0.00420596	0.00297331	-0.00850135	-0.0104039	-0.0174204	0.0018995	-0.00180015	0.0123296	-0.00680367	0.00726118
H0351.2001	inferior temporal gyrus, Left, bank of mts	-0.0164126	-0.00339137	0.0163336	0.00691188	-0.0223381	-0.0114264	-0.0345215	-0.0514918	-0.012034	-0.0304336	-0.0173929	-0.0415498	-0.0152813	-0.0462234	0.0421962	0.0262343	0.044461	0.022476	-0.00999749
H0351.2001	fusiform gyrus, Left, bank of the its	-0.0327096	-0.00850885	0.0127999	0.0099338	0.00542472	-0.00504865	-0.0298355	-0.0265258	-0.0146539	-0.0381384	-0.0304571	-0.0142709	0.0355652	-0.0175268	0.000870321	0.0237623	0.0415189	0.0222159	-0.0211362
H0351.2001	fusiform gyrus, Left, lateral bank of gyrus	-0.0345244	-0.000406714	0.00027213	0.0152679	-0.000901042	-0.0501529	-0.0547766	-0.0372121	-0.00344722	-0.052815	-0.0396807	0.00154456	0.0480888	0.000501168	0.0498805	0.0574644	0.0300926	0.0190733	0.0193734
H0351.2001	fusiform gyrus, Left, bank of cos	-0.0421077	-0.0129179	0.0203068	0.0206264	0.0593931	-0.0217572	-0.00206053	0.0197083	0.00317737	-0.0176551	0.0362107	0.0406075	0.0172674	0.0119739	0.0313779	-0.00878624	-0.0615999	-0.0630497	-0.035187
H0351.2001	parahippocampal gyrus, Left, bank of the cos	-0.0364953	-0.00358804	0.00941549	0.0226995	0.0112478	-0.0206242	-0.0259649	-0.00294164	-0.0173027	-0.0413647	-0.0301275	-0.00045897	0.0324522	-0.00461621	0.0263294	0.0169773	0.0179092	0.000711172	-0.0110664
H0351.2001	middle frontal gyrus, Left, inferior bank of gyrus	0.0300034	0.012471	0.0299298	-0.00849358	-0.00690571	0.0233266	0.0106795	-0.0126359	0.0132759	0.0119167	0.0372168	-0.0236164	-0.0425281	-0.0253773	-0.0312311	-0.053232	-0.0262634	-0.0478774	0.0214952
H0351.2001	middle frontal gyrus, Left, inferior bank of gyrus	0.0212568	0.00159391	0.0126651	-0.0249373	-0.0244333	0.0128411	-0.00415209	-0.0316947	-0.0183704	-0.020832	-0.0102582	-0.0340068	-0.00737964	-0.0402911	0.00309056	0.0133876	0.0428295	0.0212292	-0.0255554
H0351.2001	superior frontal gyrus, Left, medial bank of gyrus	0.00180453	0.01481	0.0281458	0.0196538	0.0250532	0.0259997	-0.00320787	0.0243193	-0.00990575	0.0162866	0.0164666	-0.00817134	-0.000881527	0.0133921	-0.0944804	-0.0798469	-0.085666	-0.0769289	0.0133065
H0351.2001	superior frontal gyrus, Left, lateral bank of gyrus	0.00674006	-0.00380817	0.00432739	-0.00952644	0.0324961	-0.0212802	-0.0228051	0.0294079	-0.00842901	-0.0136487	0.00550052	0.00775585	0.0577883	0.00115299	0.0259055	0.00358086	0.00264886	-0.00865859	-0.0269286
H0351.2001	Cingulate gyrus, frontal part, Left, superior bank of gyrus	-0.0400776	0.0167073	-0.0664652	-0.0243092	-0.0322321	-0.0839584	0.0183403	-0.0236431	-0.0719129	-0.054208	-0.0852413	0.0553892	0.0483682	0.0813525	0.0274193	0.0641324	-0.00390253	0.0437735	-0.0334322
H0351.2001	subcollosal gyrus, Right	-0.0686882	-0.0567861	-0.0334129	-0.0415216	0.0949558	0.0512058	0.106318	0.0422368	-0.00614133	0.042023	0.0432404	0.0866244	0.0169865	0.0523646	-0.0392513	-0.0399642	-0.0880658	-0.0510525	0.0132513
H0351.2001	parolfactory gyri, Right	-0.0317644	0.00452609	0.010539	0.0263084	0.0209736	-0.0409013	-0.0549149	-0.0316102	-0.0182087	-0.0325434	-0.0254036	0.0179185	0.0200155	0.0204627	0.0109962	0.00649326	-0.00427762	-0.0161142	0.0103101
H0351.2001	Head of Caudate Nucleus, Right	-0.0931141	-0.118818	-0.0850026	0.0658695	0.0331202	-0.0239289	0.0339879	0.0768456	-0.0152263	0.0038447	-0.011511	0.0604047	-0.00385395	0.0287071	0.0325623	0.0367173	-0.0175844	0.0409727	-0.016303
H0351.2001	Putamen, Right	-0.0693648	-0.093779	-0.0682547	0.062454	0.0572334	-0.00716879	0.0287332	0.0837214	-0.029945	0.0346071	0.000569666	0.0648035	-0.0108425	0.0476198	-0.00584023	-0.0186288	-0.0820702	-0.0197316	-0.00143739
H0351.2001	superior temporal gyrus, Left, lateral bank of gyrus	-0.0136634	0.00973749	0.0054921	0.00553489	0.0297288	-0.00854853	-0.00700545	0.00626202	-0.00837433	0.00340933	0.00201702	0.0133981	0.0290619	0.0230947	-0.0242691	-0.0397464	-0.0266794	-0.0219912	-0.000591707
H0351.2001	superior temporal gyrus, Left, inferior bank of gyrus	-0.00465206	0.0115506	0.0206145	0.0153051	0.0110351	-0.00681892	-0.0133	-0.00269594	0.00363946	0.00364114	0.0306464	0.000831438	-0.0210344	-0.00374951	-0.0223407	-0.0349032	-0.0300092	-0.0395781	0.0126592
H0351.2001	middle temporal gyrus, Left, superior bank of gyrus	-0.0185875	0.00406326	0.0213782	0.0123677	0.00934011	-0.0199536	-0.00357006	-0.0353629	0.00940017	-0.0128243	0.0223794	0.00826002	-0.0186447	-0.00639785	0.0351589	-0.00710067	-0.00317913	-0.0228325	0.00622165
H0351.2001	planum polare, Left	-0.0395767	-0.0201918	-0.0561882	-0.0335122	0.0196242	-0.0551191	-0.0112649	0.0213774	-0.030069	-0.039243	-0.0545739	0.0181472	0.123875	0.0408886	0.0128771	0.0658176	0.0342133	0.0691829	-0.0351439
H0351.2001	inferior frontal gyrus, opercular part, Left	0.0128269	0.0126518	0.00363836	-0.0119655	-0.0112189	-0.00564724	-0.0128957	-0.0150175	-0.0219253	-0.022986	-0.0284744	-0.0197566	0.0200183	-0.00328056	-0.00493302	0.0198582	0.0234241	0.0189512	-0.0161422
H0351.2001	paracentral lobule, anterior part, Left, superior bank of gyrus	0.0338639	0.0197784	0.026245	-0.00852078	-0.0164414	0.0107554	0.000796554	0.00340682	-0.00545981	0.0015518	0.0235087	-0.0276798	-0.0436933	-0.0196329	-0.0312085	-0.057746	-0.0201738	-0.041088	0.0104645
H0351.2001	paracentral lobule, anterior part, Left, inferior bank of gyrus	0.029441	0.0102297	-0.00361352	-0.0243229	-0.0442433	-0.0136869	-0.00832322	-0.00634055	-0.00851923	-0.00932647	-0.005592	-0.0279869	-0.0356561	-0.0316416	0.0156503	0.0287684	0.0277524	0.016297	3.5638e-05
H0351.2001	occipito-temporal gyrus, Left, superior bank of gyrus	0.00552095	0.0148336	-0.00193371	-0.00593836	-0.0432492	-0.0220432	-0.0412272	-0.038523	-0.0202783	-0.0118486	-0.0226605	-0.0314391	-0.0267182	-0.0218811	0.0337244	0.022186	0.0412718	0.0350991	-0.014231
H0351.2001	inferior frontal gyrus, opercular part, Right	0.019869	0.0226909	0.0272636	0.000385846	0.00443652	0.00550388	-0.00703404	-0.0267151	-0.00792822	-0.015229	0.00202055	0.00192773	-0.0266782	-0.00776172	-0.0307708	-0.0404233	-0.0271493	-0.0398154	-0.00152144
H0351.2001	frontal operculum, Right	-0.00977081	-0.00921877	0.0120838	-0.00405317	-0.0194884	-0.00537601	-0.0223131	-0.0299816	-0.00741327	-0.0442737	-0.0254826	-0.0362781	-0.0277043	-0.0526074	0.0328321	0.0380005	0.0445812	0.0214653	-0.0218368
H0351.2001	superior temporal gyrus, Right, lateral bank of gyrus	-0.0435608	0.00460542	-0.0697642	-0.0267688	0.0210271	-0.0614102	0.0333074	0.00772421	-0.0196552	-0.0435906	-0.0752412	0.066184	0.104682	0.0889546	0.0279447	0.068913	0.00142138	0.0588058	0.00348466
H0351.2001	Heschel's gyrus, Right	-0.0117183	0.015111	0.0220545	0.0184288	0.0254923	-0.0131548	-0.0238364	-0.00877105	-0.00307915	0.000491252	0.0187802	0.00873246	-0.00431222	0.0105782	-0.0281845	-0.0228557	-0.0434695	-0.045111	-0.00738963
H0351.2001	Short Insular Gyri, Right	-0.0174815	-0.00870589	0.0283413	0.0221643	-0.00685477	0.0515416	-0.0317276	-0.0226458	-0.0213373	0.00138484	-0.0332365	-0.0475289	-0.0312972	-0.0381721	-0.0209432	-0.0370135	0.013645	-0.00367984	-7.02881e-05
H0351.2001	Cingulate gyrus, frontal part, Right, superior bank of gyrus	-0.0200308	0.00449865	0.00275484	0.0113811	-0.000185329	-0.00624495	0.00148288	0.0171497	-0.00747661	0.00306907	0.0157848	0.0179673	-0.032119	0.00916116	-0.0111059	-0.0333248	-0.0358056	-0.0359068	0.0123603
H0351.2001	middle temporal gyrus, Right, superior bank of gyrus	-0.0337495	0.0110306	-0.0441559	-0.0205226	-0.0446132	-0.077891	-0.0213558	-0.0525632	-0.0429351	-0.0759582	-0.0841306	0.0217236	0.0468693	0.0220295	0.0679969	0.0683215	0.029839	0.0658479	-0.0378515
H0351.2001	middle temporal gyrus, Right, inferior bank of gyrus	-0.0284381	0.00742826	-0.0436508	-0.000179326	-0.0335005	-0.0661695	-0.0362857	-0.00860092	-0.0343747	-0.02529	-0.0541416	-0.0060435	0.0410009	0.0259451	0.026427	0.0538986	0.0276792	0.0573847	-0.000198095
H0351.2001	inferior temporal gyrus, Right, bank of the its	-0.0255983	-0.0116381	0.0467542	0.0331217	0.018692	0.0203435	-0.0170327	-0.020173	0.0255964	0.0100487	0.0503618	-0.0159329	-0.0552418	-0.047498	-0.0181329	-0.0374487	-0.0221731	-0.0614342	0.0234171
H0351.2001	inferior temporal gyrus, Right, lateral bank of gyrus	-0.0167761	-0.00137731	0.0258167	0.00694079	0.018092	0.00704204	0.00347246	-0.0328092	-0.00161642	-0.0141534	0.0103811	0.00148547	-0.0149828	-0.0181812	0.00634297	0.00208189	0.0178025	-0.00920211	-0.00213745
H0351.2001	fusiform gyrus, Right, bank of the its	-0.0317	-0.00349488	0.0279141	0.0286425	0.00608308	0.00478489	-0.0276746	-0.0286201	0.00380526	-0.00946712	0.00964541	0.00994135	-0.0401986	-0.0235821	0.00947501	-0.00630551	0.0134343	-0.0165977	-0.00294109
H0351.2001	fusiform gyrus, Right, lateral bank of gyrus	-0.0445894	-0.0172779	-0.00950794	0.0039945	0.0287295	-0.0155511	-0.00164118	0.00620481	-0.0179897	-0.0157266	-0.023066	0.0162416	0.0161716	0.00246136	0.0366386	0.0311954	0.0245166	0.0160832	-0.0184906
H0351.2001	fusiform gyrus, Right, bank of cos	-0.0413748	-0.0144436	0.0366566	0.0281601	0.0344592	0.00689315	-0.0156195	-0.0131919	0.0104434	-0.0175236	0.0257582	0.0122176	-0.0207238	-0.0255115	0.0222604	-0.016311	-0.0364504	-0.0584429	0.0105446
H0351.2001	parahippocampal gyrus, Right, bank of the cos	-0.0438863	-0.0183724	0.0146295	0.0222885	0.0359001	-0.0105864	-0.0193159	0.0188564	-0.00265675	-0.0288095	0.000467622	0.0161433	0.0233598	-0.00780946	-0.000525332	0.00494984	0.0111927	-0.0166366	-0.00920927
H0351.2001	frontal operculum, Left	-0.00713153	0.00854127	-0.000687114	-0.000809363	0.0224686	-0.034085	-0.0133756	0.0147792	-0.0137354	-0.0247466	-0.00353057	0.0261871	0.090494	0.0273551	0.000213931	-0.00205854	-0.0283733	-0.0252976	-0.00289664
H0351.2001	Head of Caudate Nucleus, Left	-0.0753119	-0.116107	-0.0680457	0.0500098	0.0355704	-0.00382655	0.0276413	0.0727617	-0.0237476	0.00867931	-0.00852346	0.040066	0.00756907	0.00370988	0.0331663	0.0417166	-0.000592952	0.0297548	-0.0353558
H0351.2001	Putamen, Left	-0.0718103	-0.101544	-0.0527365	0.0747042	0.0651933	-0.0036721	0.0246149	0.0761823	-0.0149049	0.0329625	0.0258108	0.0599825	0.0112003	0.0350577	-0.021168	-0.0151743	-0.0919042	-0.0462604	-0.00251006
H0351.2001	Putamen, Left	-0.0655057	-0.0892451	-0.0728222	0.0632466	0.0498775	-0.0102994	0.039363	0.0858563	-0.0310275	0.0382482	0.00624454	0.0750217	-0.0136957	0.059592	-0.0173305	-0.0104545	-0.101327	-0.0371129	-0.00889496
H0351.2001	middle temporal gyrus, Right, inferior bank of gyrus	-0.00558711	0.0288688	0.0133529	0.0292843	0.0133558	-0.0209375	-0.0247476	0.00451627	-0.0148711	0.00683061	0.0126914	0.00959952	0.0104056	0.030966	-0.0452256	-0.0416262	-0.074249	-0.0665964	-0.000235268
H0351.2001	middle temporal gyrus, Left, superior bank of gyrus	-0.0146942	-0.00844376	0.0315386	0.0124152	0.00444357	0.00936373	-0.0241922	-0.0305064	0.00225645	-0.0217763	0.00359119	-0.0227903	-0.00456205	-0.0405101	0.0112863	-0.000498195	0.0320906	0.00134732	0.00287149
H0351.2001	Putamen, Right	-0.0727933	-0.0986276	-0.101302	0.0107081	0.0453746	-0.00977278	0.0572815	0.097061	-0.0380685	0.0289703	-0.0116443	0.0649486	0.0869032	0.0471855	0.0494143	0.0255972	-0.0330711	0.032636	-0.0188573
H0351.2001	supramarginal gyrus, Left, inferior bank of gyrus	0.00900663	0.0025179	0.0228474	-0.0120134	-0.0233559	0.0090939	-0.0170285	-0.0470378	2.07413e-05	-0.0256266	-0.00465256	-0.0320673	-0.0293492	-0.0451572	0.00885459	-0.000682788	0.033143	0.00702726	0.00164604
H0351.2001	middle temporal gyrus, Right, superior bank of gyrus	0.0149816	0.0233415	0.00995419	-0.0106859	-0.00666677	-0.00496201	-0.00479636	-0.0186198	-0.0195609	-0.0175679	-0.00227393	0.0160281	-0.0202252	0.0134788	-0.0176092	-0.0281696	-0.0306051	-0.0300959	-0.00950629
H0351.2001	inferior temporal gyrus, Right, bank of the its	0.00706232	-0.00511112	0.0286175	-0.00370133	-0.0256413	0.0115644	-0.0306427	-0.0293871	0.00969906	-0.00636976	0.013016	-0.0483616	-0.0436796	-0.0662821	0.00267419	-0.00219662	0.0361151	0.00353988	-0.000569092
H0351.2001	Head of Caudate Nucleus, Right	-0.0791982	-0.117373	-0.0614764	0.053626	0.0268061	0.0178594	0.0166674	0.0527526	-0.036031	-0.000108523	-0.0337885	0.0300571	-0.0157938	-0.0106031	0.0272254	0.0401757	0.0195624	0.0476663	-0.0362651
H0351.2001	Head of Caudate Nucleus, Left	-0.0716193	-0.114852	-0.0805836	0.0384979	0.016068	0.0205005	0.0410351	0.0696954	-0.0336717	0.0126827	-0.0366338	0.0274018	0.0105009	0.00677131	0.0295367	0.0348387	0.0137103	0.0572119	-0.0396095
H0351.2001	superior frontal gyrus, Right, medial bank of gyrus	-0.0275358	-0.0055814	-0.00581335	-0.00963388	0.0220779	-0.0125669	0.0271883	0.00651421	-0.016163	-0.0202167	-0.0026037	0.0231713	0.0277747	0.0174058	0.000627266	0.0151102	3.37926e-05	-0.00276455	-0.0156651
H0351.2001	superior frontal gyrus, Right, lateral bank of gyrus	0.00640603	0.00138005	0.00802793	-0.0054312	-0.0191339	-0.0149387	-0.0266905	-0.0195686	-0.00296075	-0.0240553	-0.00993856	-0.0210886	0.0133398	-0.0275285	0.0219803	0.0299308	0.0244086	0.0099016	-0.0113481
H0351.2001	superior frontal gyrus, Right, medial bank of gyrus	-0.0094642	0.0176396	-0.0395649	-0.015337	0.0136458	-0.0606848	0.00180943	0.0455255	-0.0259039	-0.0198519	-0.0183588	0.0324491	0.0400387	0.0648745	-0.0187514	0.00843831	-0.0465546	-0.0107339	-0.00356188
H0351.2001	Cingulate gyrus, parietal part, Left, inferior bank of gyrus	-0.00731142	0.00922626	-0.0233888	-0.00787511	-0.0535779	-0.0137639	-0.0057365	-0.0233114	-0.039099	-0.0188782	-0.03255	-0.0141123	-0.02107	-0.00323271	0.0180541	0.014436	0.0300058	0.046391	-0.0287083
H0351.2001	middle temporal gyrus, Left, inferior bank of gyrus	-0.0245253	-0.017124	0.016649	0.00489207	-0.00236786	0.0145845	-0.00761256	-0.0340267	-0.0197013	-0.0223051	-0.00731768	-0.0160469	-0.0346674	-0.0351588	0.0232717	0.0158874	0.0376738	0.0221254	-0.0255666
H0351.2001	inferior temporal gyrus, Left, bank of the its	-0.0260713	0.00644357	0.00179587	0.0129605	0.00804504	0.0118632	0.00366747	0.00340522	-0.0297537	-0.0132835	-0.0222932	0.0295882	-0.00824585	0.0185611	-0.0322608	-0.0579865	-0.0703617	-0.0572116	0.00330452
H0351.2001	inferior temporal gyrus, Left, bank of mts	-0.0352472	-0.026969	0.00965542	-0.0066486	-0.000981165	0.0290703	0.0202105	-0.0264742	-0.0173436	-0.0192615	-0.000392343	-0.0277414	-0.0240647	-0.0360265	0.00982481	-0.00647766	0.0297012	0.0307631	-0.0219261
H0351.2001	fusiform gyrus, Left, bank of cos	-0.0167129	0.000111986	0.0234194	0.0321864	0.00842268	-0.00332109	-0.0340543	0.00207308	-0.0165353	0.0190995	0.0154244	-0.0164226	-0.0392899	-0.0192646	0.0219514	-0.0279964	0.009411	-0.0184056	-0.0190297
H0351.2001	inferior temporal gyrus, Right, bank of the its	-0.0209388	-0.00867219	0.0313678	0.0277566	0.0068207	-0.00605465	-0.035525	-0.00980755	0.00724709	-0.00332624	0.0381895	-0.0249412	-0.0347872	-0.0337639	-0.0192663	-0.0316831	-0.0174319	-0.0367149	-0.00997609
H0351.2001	inferior temporal gyrus, Right, lateral bank of gyrus	-0.0112725	0.0242837	0.00957794	0.0162626	0.00473669	-0.0177237	-0.027413	-0.0362402	-0.0316393	-0.0361112	-0.0321555	0.017324	-0.0035896	0.0280925	-0.0230198	-0.0462275	-0.0570776	-0.0509596	-0.00867066
H0351.2001	fusiform gyrus, Right, bank of the its	-0.0152202	0.0011014	0.00464605	0.00191736	0.00192885	0.0275198	0.0276575	-0.0234638	-0.0273597	0.017226	0.00468447	0.00694253	-0.00641739	0.0118987	-0.0129123	-0.0437943	-0.0157528	-0.00315443	-0.00864036
H0351.2001	fusiform gyrus, Right, lateral bank of gyrus	-0.00763324	0.0115919	0.00887492	0.017215	-0.00470321	-0.0193171	-0.0276911	-0.013438	-0.0217009	-0.00696572	-0.00240459	0.0192382	-0.00889793	0.00347121	0.00108668	-0.00954855	-0.0287212	-0.0381461	-0.0098898
H0351.2001	parahippocampal gyrus, Right, lateral bank of gyrus	0.00786473	0.0249104	-0.00688808	0.00879186	-0.0198285	-0.0304054	-0.0326641	-0.0208918	-0.031231	0.0025875	-0.0243605	0.0109811	0.0103418	0.0179861	0.00620782	-0.0116601	0.00447881	0.00986559	-0.0279129
H0351.2001	parahippocampal gyrus, Right, bank of the cos	-0.0118219	-0.00231466	0.00831843	0.0155464	-0.0197551	0.0154399	-0.0321761	-0.0262997	-0.0336416	-0.0172848	-0.06119	-0.0110104	-0.0304151	-0.0256892	0.0237452	0.00582565	0.0236172	0.0169887	-0.0311753
H0351.2001	supramarginal gyrus, Left, inferior bank of gyrus	-0.0196861	-0.00296265	-0.0106747	-0.00810042	-0.0229836	0.0113701	-0.00336888	-0.0250116	-0.0398754	-0.01771	-0.0479988	0.0103064	-0.0362951	-0.00425163	-0.00767863	-0.0031287	0.0197102	0.0344889	-0.0150175
H0351.2001	superior temporal gyrus, Left, inferior bank of gyrus	0.0157284	0.0328049	-0.0346542	-0.0167498	-0.049811	-0.00564766	0.0058676	-0.0132404	-0.0439566	0.00160576	-0.0435134	0.0251399	-0.00653267	0.0374817	-0.0170228	-0.0327892	-0.0105048	0.0156477	-0.0112413
H0351.2001	transverse gyri, Left	0.0231332	0.0314888	-0.0745857	-0.0471801	-0.0570378	-0.0104949	0.0339674	0.031494	-0.0191604	0.0405973	-0.0344521	0.0133392	0.0274484	0.0503011	0.0105605	0.0158569	-0.0282986	0.0196977	0.016357
H0351.2001	planum temporale, Left	0.022704	0.0302541	-0.0534247	-0.0267924	-0.0430579	-0.0146048	0.0223755	0.0200065	-0.0282482	0.0440483	-0.0155742	0.0201855	0.0138935	0.0414415	-0.0111983	-0.0151245	-0.023414	0.0161899	0.00554796
H0351.2001	middle temporal gyrus, Right, superior bank of gyrus	-0.0188895	-0.00557779	0.0141368	0.00253378	-0.0160807	0.0127592	-0.00704505	-0.0390379	-0.0300181	-0.0242938	-0.0173306	-0.0158812	-0.0242092	-0.022407	0.0209922	-0.00833522	0.0334668	0.0242202	-0.0302822
H0351.2001	middle temporal gyrus, Right, inferior bank of gyrus	-0.0285391	0.00303626	-0.000132169	0.00619646	-0.00873773	-0.00503034	0.00903371	-0.0289352	-0.0308563	-0.0145189	-0.0107843	0.0243798	-0.00330306	0.0133824	0.00639184	-0.0126265	-0.00662381	-0.00687078	-0.011594
H0351.2001	inferior temporal gyrus, Right, bank of mts	-0.0376332	-0.0138678	0.00972656	0.00626989	0.0129356	0.00753126	0.0161357	-0.0146592	-0.0189207	-0.0115605	0.00512464	0.0138196	-0.0410929	-0.00102081	-0.0131215	-0.0219628	-0.0230325	-0.0257905	-0.0334778
H0351.2001	precentral gyrus, Left, inferior lateral aspect of gyrus	0.0375091	0.0133622	0.00512925	-0.0239808	-0.0254533	-0.00407805	-0.011429	-0.023733	-0.028457	-0.0416651	-0.0359475	-0.0037549	-0.0203077	-0.0149186	0.0561118	0.02605	0.0399529	0.0206762	-0.0321209
H0351.2001	precentral gyrus, Left, bank of the central sulcus	0.0396954	0.0152872	-0.0322184	-0.0395568	-0.040906	0.0111594	0.0091234	0.0185301	-0.0500589	0.00213391	-0.0504933	0.00644354	-0.0189553	0.00987475	0.0377673	0.0211141	0.0261821	0.0323691	-0.0305558
H0351.2001	post central gyrus, Left, bank of the central sulcus	0.0250297	0.0319787	-0.06293	-0.0376619	-0.0770378	-0.01018	-0.00996852	0.0016713	-0.0562388	0.0140087	-0.0685364	0.0210814	-0.0201068	0.0381778	-0.0239973	-0.00092426	0.00587051	0.0492374	-0.0135538
H0351.2001	post central gyrus, Left, bank of the posterior central sulcus	0.0127126	0.00256745	0.0302314	0.00120091	0.0144026	0.0287884	-0.00757197	-0.00440674	-0.0154007	0.000237118	0.00637829	-0.0103884	-0.0475829	-0.0458208	0.0150465	-0.0185854	0.0258127	0.0106299	-0.0109735
H0351.2001	supramarginal gyrus, Left, superior bank of gyrus	-0.00092296	-0.00193535	0.00994255	-0.00103582	0.00892114	0.0270546	0.00607166	-0.00846358	-0.0127389	0.00316673	-0.00502614	0.00915768	-0.0188568	-0.013994	-0.00934727	-0.00463517	0.0107388	0.00809148	-0.00156753
H0351.2001	precentral gyrus, Right, superior lateral aspect of gyrus	0.00658133	-0.0188098	0.00504394	-0.0262276	0.0303216	0.0284983	0.038472	0.0153184	-0.0194284	-0.00492807	0.0106002	0.0414739	-0.0157358	-0.0134402	0.0179548	-0.00249452	0.00598062	-0.00689092	-0.0144712
H0351.2001	paracentral lobule, anterior part, Right, superior bank of gyrus	0.015118	0.00889814	-0.0166207	-0.0122	-0.0180636	0.00781576	-0.0189095	0.00267109	-0.0416301	-0.0326245	-0.0822808	0.0264191	0.0184277	0.023961	-0.00477791	0.00555049	0.0186922	0.0260939	-0.00827086
H0351.2001	paracentral lobule, anterior part, Left, inferior bank of gyrus	-0.0232827	-0.0319122	-0.00851132	-0.0302574	-0.0165974	0.0389842	0.0610203	-0.00578433	-0.00496695	0.0205527	0.0407302	-0.0461787	-0.0297141	-0.0348755	0.0286435	-0.00582694	0.0288861	0.0227822	-0.0252917
H0351.2001	Cingulate gyrus, parietal part, Right, superior bank of gyrus	-0.00666221	0.00837906	0.0276307	0.0210248	0.00804087	0.0232145	-0.0244367	-0.000446218	-0.0279679	-0.0102972	-0.0045708	0.00657882	-0.0290749	-0.00634542	-0.0353997	-0.0599744	-0.0482561	-0.0555015	-0.00333661
H0351.2001	precentral gyrus, Right, inferior lateral aspect of gyrus	0.0378691	-0.00926901	0.00771763	-0.0302154	0.0200828	0.018213	0.0477763	0.0368356	0.00455098	0.0635009	0.0696826	-0.0316029	-0.0217245	-0.0320098	0.0140571	0.00114892	-0.028539	-0.0417662	-0.0297022
H0351.2001	precentral gyrus, Right, bank of the central sulcus	0.020302	0.00933235	0.00813698	-0.0147887	0.0120796	0.00587689	0.00879726	-0.000908228	-0.0243747	-0.0221199	-0.0167817	0.0292756	-0.0234611	0.00759587	0.0209055	-0.0183738	-0.0455927	-0.0465286	-0.0189228
H0351.2001	post central gyrus, Right, superior lateral aspect of gyrus	0.0427226	0.00848438	0.00705062	-0.0295364	0.00271015	0.0118426	-0.0306743	-0.0201133	-0.0261383	-0.00235775	-0.0144079	0.00442453	0.0208753	-0.017265	0.011061	0.0272648	0.0333121	0.0232122	-0.026503
H0351.2001	post central gyrus, Right, inferior lateral aspect of gyrus	0.0429273	0.00760382	-0.0161046	-0.0312417	-0.0173625	0.000327493	-0.0243192	-0.0207248	0.0294678	-0.0129688	-0.0302544	0.010833	0.0171365	-0.000208299	0.0146608	0.0519158	0.0353356	0.0443758	0.0640524
H0351.2001	supramarginal gyrus, Right, superior bank of gyrus	-0.00602553	-0.0067226	0.0358443	0.016507	0.0401045	0.0148834	-0.0248835	-0.00680363	-0.0102095	-0.00526493	0.0110309	0.00025244	-0.0224265	-0.023845	-0.0293584	-0.0236251	-0.012548	-0.0362508	-0.0147468
H0351.2001	supramarginal gyrus, Right, inferior bank of gyrus	-0.00666454	-0.000252567	-0.0313078	-0.0169111	-0.0136652	-0.028671	0.0097435	-0.00458018	0.0349461	-0.0335245	-0.0222807	0.0265195	0.0213893	0.0298217	-0.0354423	0.0141145	-0.0469044	-0.0291528	0.0868058
H0351.2001	angular gyrus, Left, inferior bank of gyrus	-0.0322902	-0.0088383	-0.0584196	-0.0323464	-0.00108689	-0.114123	-0.023378	0.0376736	0.0113759	-0.0356275	0.0161656	-0.0332645	0.0870209	0.0400795	-0.0765481	0.0386495	0.00300936	0.0576834	-0.00275762
H0351.2001	supraparietal lobule, Left, inferior bank of gyrus	0.0334109	0.010117	0.00587798	-0.0123369	-0.00631854	0.0141227	-0.0262426	-0.01358	-0.00158128	0.00143842	-0.0234011	-0.00546062	-0.0118717	-0.0157341	0.000477749	0.0213093	0.0410505	0.0333055	0.0241175
H0351.2001	paracentral lobule, anterior part, Left, superior bank of gyrus	0.0267323	-0.00330108	0.0226118	-0.00844086	-0.0141361	-0.0163844	-0.0336211	-0.0129951	-0.00468432	-0.0310753	0.00673951	-0.0639406	-0.0104913	-0.0552308	0.00475981	0.00638119	0.0419108	0.0132363	-0.0204419
H0351.2001	Cingulate gyrus, parietal part, Left, superior bank of gyrus	-0.0194952	-0.0132904	0.035535	0.0196264	0.0107023	-0.0113602	-0.0139337	-0.00984364	0.00964937	-0.00636303	0.0528213	-0.0305915	-0.0303807	-0.0458147	-0.0128416	-0.0220946	-0.0225273	-0.0481479	-0.0235849
H0351.2001	inferior temporal gyrus, Right, lateral bank of gyrus	-0.0423928	0.00295077	0.00312811	0.0194253	0.0282636	-0.0186966	-0.00335903	-0.0202437	-0.0286481	-0.0303901	-0.0279848	0.0538908	0.0107457	0.0386535	-0.00146825	0.0167903	-0.0415657	-0.0354482	-0.010124
H0351.2001	supramarginal gyrus, Right, inferior bank of gyrus	0.0147725	0.0168566	-0.0108438	0.00267596	-0.0249256	-0.0179215	0.00326927	-0.00758829	0.0443903	-0.0115309	-0.0144607	-0.00780771	0.0140864	0.00853366	-0.018191	0.029568	-0.00045466	9.55212e-05	0.0933812
H0351.2001	middle temporal gyrus, Left, superior bank of gyrus	-0.0117383	-0.0195405	0.031857	0.0177073	0.0370725	0.0179052	0.0289327	0.00255207	0.0335457	0.0389808	0.0611582	-0.0345291	0.0093319	-0.0415274	-0.00392266	4.78806e-05	-0.029125	-0.0514982	0.0322797
H0351.2001	supramarginal gyrus, Left, inferior bank of gyrus	0.00197802	0.00131997	0.026392	0.0100651	0.0166097	0.00695607	0.00111977	-0.0141348	0.000102329	0.0156434	0.0368317	-0.010401	-0.0191462	-0.0241608	-0.0101203	-0.0186171	-0.0232997	-0.0379803	-0.00685378
H0351.2001	inferior temporal gyrus, Right, bank of the its	-0.0170265	0.0282197	-0.0148757	0.0231584	-0.0413563	-0.0265417	-0.0401894	-0.0187094	-0.0381707	-0.0213472	-0.0429497	0.0206273	-0.0256273	0.0359501	-0.0279722	-0.049184	-0.0594597	-0.0388901	-0.00437685
H0351.2001	paracentral lobule, anterior part, Right, inferior bank of gyrus	-0.00213647	-0.0174272	0.0183461	0.00188964	0.0170789	0.0279329	0.0400117	0.0170218	0.00320438	0.0435804	0.0530361	-0.0252212	-0.0132727	-0.0346313	-0.00853322	-0.0169694	-0.031019	-0.0377536	-0.0199511
H0351.2001	superior temporal gyrus, Left, lateral bank of gyrus	-0.00780167	-0.010536	0.00999433	-0.00654521	-0.000654385	-0.0234976	-0.0450504	-0.0410607	-0.00376738	-0.0358783	-0.0088556	-0.0411715	0.0366085	-0.0369229	0.0267962	0.0348759	0.0365933	0.0363243	-0.0322572
H0351.2001	superior temporal gyrus, Left, inferior bank of gyrus	0.00764295	0.0239035	0.000417187	0.00724458	-0.0179509	-0.0270412	-0.0369128	-0.0106065	-0.0264783	-0.0231605	-0.0150806	0.0176272	0.00184294	0.0154114	-0.00126048	-0.0226779	-0.000672509	-0.00771429	-0.00790276
H0351.2001	middle temporal gyrus, Left, superior bank of gyrus	0.00502833	0.00724907	-0.0151573	-0.00454038	-0.0356971	-0.0235148	-0.0335555	0.00687709	-0.0253194	-0.00471225	-0.0172753	-0.03604	0.0204284	-0.00342258	-0.00747835	-0.00543479	0.0223384	0.0331191	-0.0286414
H0351.2001	middle temporal gyrus, Left, inferior bank of gyrus	-0.00171609	0.0251537	0.043355	0.0459896	0.017411	0.00413725	-0.0192768	-0.0244357	-0.0129525	-0.017598	0.0159614	-0.0233169	-0.000999822	-0.0237211	-0.00544213	-0.0472585	0.0189954	-0.0182659	-0.0230415
H0351.2001	inferior temporal gyrus, Left, lateral bank of gyrus	-0.0320657	-0.0281905	0.00884533	-0.0109573	0.0172307	0.0108526	0.0288075	-0.0159915	0.0222814	-0.0114169	0.0302529	-0.0383521	-0.00580746	-0.0212462	0.0200582	0.0209125	0.0291741	0.0123246	-0.00253405
H0351.2001	Heschel's gyrus, Left	0.00502714	0.0264319	-0.0348534	-0.00673229	0.000112647	-0.05484	-0.0214938	0.0218573	-0.0176354	-0.000148182	-0.0173051	0.017361	0.0445171	0.0629716	-0.0431578	-0.00411699	-0.0465832	-0.0128343	-0.00334803
H0351.2001	planum temporale, Left	0.00410265	-0.00400327	-0.00646893	-0.0149622	-0.000508394	-0.0326225	-0.0280387	-0.0178695	-0.00680724	-0.021233	0.00242366	0.00060403	0.0123034	-0.0141365	0.0429855	0.0310181	0.0321999	0.0250806	-0.00919263
H0351.2001	middle temporal gyrus, Left, inferior bank of gyrus	-0.0132058	-0.00618153	0.017995	0.00804745	0.0281983	-0.0340446	-0.0118586	0.0044732	0.00858478	-0.00936144	0.038132	-0.014315	0.0576919	-0.00852712	-0.0176614	0.00370707	-0.022374	-0.0379484	-0.00822188
H0351.2001	Cingulate gyrus, parietal part, Right, inferior bank of gyrus	0.0397837	0.0519583	-0.0723082	-0.0499862	-0.0641419	-0.044629	0.0270236	0.0476323	-0.0207952	0.0659173	0.00339734	0.00290085	0.0469049	0.075149	-0.0322703	-0.0163885	-0.0751073	-0.0317422	0.00624925
H0351.2001	post central gyrus, Right, superior lateral aspect of gyrus	0.0647931	0.0294019	-0.00452198	-0.050459	-0.051866	0.012044	-0.00174759	-0.0413681	-0.0302362	0.017767	-0.0126811	-0.0333342	-0.0031507	-0.0212479	0.0060085	-0.0144891	0.0324463	0.0421605	-0.00813571
H0351.2001	superior temporal gyrus, Right, inferior bank of gyrus	0.0700304	0.0374326	-0.0313491	-0.0588083	-0.0753189	-0.0303313	-0.00855071	-0.0063156	-0.0208312	0.0388585	0.00216602	-0.0429215	0.0141215	0.0036393	0.00623294	-0.00207197	0.0290573	0.0445704	-0.00856785
H0351.2001	parahippocampal gyrus, Left, bank of the cos	-0.0387188	-0.0113625	-0.00764012	0.00110173	0.00953504	-0.0204787	-0.024481	-0.00125905	-0.0288969	-0.0473524	-0.0417094	0.00537294	0.0595156	0.00586866	0.0367951	0.0213128	0.0443061	0.0426724	-0.0312111
H0351.2001	superior frontal gyrus, Left, medial bank of gyrus	0.0282994	0.0183194	0.0167075	-0.0115753	-0.022958	0.017303	-0.0146499	-0.0245458	-0.0384506	-0.0233867	-0.0319938	-0.0133479	-0.00853388	-0.0208575	0.0134288	-0.00342928	0.0389609	0.0270411	-0.0356927
H0351.2001	superior frontal gyrus, Right, medial bank of gyrus	0.0227245	0.0271463	-0.0157023	-0.0184158	-0.0370939	-0.0430562	-0.0413863	-0.0253898	-0.0342631	-0.0339464	-0.0530211	-0.0109406	0.0429401	0.0157661	0.0284591	0.0227506	0.0344137	0.0385812	-0.0154352
H0351.2001	superior frontal gyrus, Left, lateral bank of gyrus	0.0107805	0.00102245	0.0180087	-0.0196198	0.0235117	0.0371986	0.0339777	-0.013605	0.0139494	0.000204245	0.000210569	0.017317	-0.032711	-0.011075	-0.0269477	-0.0199834	-0.0292259	-0.0309744	0.0290517
H0351.2001	superior temporal gyrus, Right, lateral bank of gyrus	0.0299431	0.0213213	0.0330904	-0.00370961	0.0128211	0.0301499	-0.0108593	-0.0192418	-0.00700849	0.0128938	0.0148157	-0.011087	-0.0163628	-0.0220126	-0.0305707	-0.0368891	-0.027994	-0.0349408	-0.0182252
H0351.2001	superior temporal gyrus, Right, inferior bank of gyrus	0.00848575	0.00258713	0.0461775	0.0160497	0.0219547	0.0285245	-0.0233285	-0.00975906	0.00893693	0.0228782	0.0514821	-0.026914	-0.0428478	-0.0410501	-0.0339439	-0.0474175	-0.0308781	-0.0509628	-0.00106465
H0351.2001	middle temporal gyrus, Right, superior bank of gyrus	0.00463861	0.00487122	0.0323471	-0.000489678	0.0280597	0.0219602	0.0105252	-0.0121918	0.010356	0.00417934	0.0358123	-0.00391452	-0.0166971	-0.0190321	-0.0171509	-0.0267693	-0.0276083	-0.0402505	0.016732
H0351.2001	middle temporal gyrus, Right, inferior bank of gyrus	0.000701997	-0.00163171	0.0247784	0.00247744	-0.0102089	0.0149865	-0.0185899	-0.0278481	-0.0111532	-0.0185894	0.00363488	-0.0422949	-0.0246766	-0.0484741	0.0141837	-0.00882387	0.0430867	0.0256569	-0.0102173
H0351.2001	inferior temporal gyrus, Right, bank of mts	-0.00812671	-0.00787617	0.00967261	-0.00590382	-0.0058584	0.0210914	-0.00847365	-0.0197733	-0.0335947	-0.0224584	-0.0286037	-0.004796	-0.016029	-0.0361305	0.056968	0.0150588	0.0443025	0.0367231	-0.032792
H0351.2001	superior temporal gyrus, Left, inferior bank of gyrus	-0.00363389	-0.00622937	0.0025183	-0.0150986	-0.0100634	-0.0261145	-0.0252568	-0.0250388	-0.00536099	-0.0350177	0.00483405	-0.00770618	-0.0178138	-0.0308332	0.0287849	0.0619337	0.0330111	0.0179818	-0.0134858
H0351.2001	middle temporal gyrus, Left, superior bank of gyrus	0.00778851	0.0023899	0.0132842	-0.00630313	-0.0197037	0.000311365	-0.0331712	-0.0171637	-0.0175081	-0.0244775	-0.0134287	-0.0208847	-0.00932236	-0.036112	0.0277195	0.00432557	0.043438	0.0339634	-0.00900961
H0351.2001	middle temporal gyrus, Left, inferior bank of gyrus	0.00946082	0.0043157	0.0439807	0.00903541	0.0071647	0.0163772	-0.0165432	-0.0193582	0.0105564	0.00652758	0.0492309	-0.0426335	-0.0334642	-0.0377058	-0.0354389	-0.0495466	-0.0335664	-0.0466985	-0.0142905
H0351.2001	inferior temporal gyrus, Left, lateral bank of gyrus	0.00519938	0.00787974	0.0172256	-0.00726653	-0.0026063	0.0235454	0.0135613	-0.0309368	-0.0156727	0.00172008	-0.000150239	-0.0036684	-0.0202262	-0.0145224	0.00892226	-0.00104799	0.00934599	-0.00153348	-0.0100256
H0351.2001	inferior temporal gyrus, Left, bank of mts	-0.0162733	-0.00361786	-0.0107304	-0.0131331	-0.0249045	-0.0495939	-0.0286782	-0.0262638	-0.0132386	-0.0480863	-0.0101631	-0.00710487	-0.0252631	-0.0195215	0.0246496	0.0635773	0.0288696	0.0176626	-0.0324817
H0351.2001	inferior temporal gyrus, Left, bank of the its	-0.00894829	0.0116134	0.000414884	0.00276254	-0.0221592	-0.0293939	-0.0374997	-0.0238316	-0.0243229	-0.0224218	-0.0162471	-0.0135526	0.0147059	0.0045349	0.0075165	0.0112273	0.0324345	0.0263749	-0.0232263
H0351.2001	fusiform gyrus, Left, bank of the its	-0.0183164	-0.000633755	0.0162423	0.0146882	0.00724603	-0.031144	-0.0309763	-0.0182325	0.00738215	-0.00371419	0.025123	-0.00850214	-0.010103	-0.0166467	0.0108586	-0.00173678	-0.0265278	-0.040888	-0.00984468
H0351.2001	fusiform gyrus, Left, lateral bank of gyrus	-0.020467	0.00819563	0.0153722	0.0155158	0.0243257	-0.00813934	-0.0113614	-0.0103319	-0.0126232	-0.00166359	0.00616597	0.00030458	-0.00287652	0.0102656	-0.023852	-0.0223661	-0.0376902	-0.0358113	-0.0114342
H0351.2001	fusiform gyrus, Left, bank of cos	-0.0447596	-0.00971555	-0.0208357	-0.00644964	-0.0189541	-0.0817964	-0.034511	-0.00961805	0.00660119	-0.0388455	-0.00117302	-0.0120588	0.0320215	0.00912942	0.0332104	0.0527818	0.0396258	0.0431453	-0.00398459
H0351.2001	parahippocampal gyrus, Left, lateral bank of gyrus	-0.0186599	0.0305184	-0.0712068	-0.0227566	-0.00791058	-0.0545	0.0302748	0.0354153	-0.0233057	-0.00540208	-0.0941936	0.053621	0.0453452	0.102797	-0.0340871	-0.0169596	-0.0532192	-0.0116067	0.0322729
H0351.2001	parahippocampal gyrus, Left, bank of the cos	-0.00661803	0.0335532	-0.0546074	-0.0106266	-0.0217987	-0.075061	0.00529708	0.0344791	-0.0162006	-0.0155392	-0.051678	0.0390274	0.0371092	0.0705094	-0.0011598	0.0143794	-0.0500352	-0.0263467	0.0228828
H0351.2001	middle frontal gyrus, Left, inferior bank of gyrus	0.0354454	0.0221856	0.00403937	-0.0211867	-0.0424256	-0.0119893	-0.029731	-0.0203062	-0.0297393	-0.0237389	-0.0212682	-0.037925	0.000664897	-0.0137845	-0.00203846	-0.00493163	0.0344629	0.0292266	-0.0137684
H0351.2001	frontal operculum, Right	0.00255519	0.0105599	0.00313444	-0.00429913	-0.0278191	0.0125239	-0.0404865	-0.0149665	-0.0479651	-0.0244138	-0.0429668	0.00720563	-0.0416876	-0.0223722	0.0130319	-0.00856212	0.0357559	0.0300406	-0.0208595
H0351.2001	Putamen, Right	-0.0632234	-0.0788247	-0.102296	0.00665817	0.010781	-0.0290516	0.0594163	0.0736578	-0.0196845	0.0120977	-0.0415021	0.0934106	0.0583314	0.0780573	0.0064361	0.0191455	-0.0547309	-0.0067965	-0.00166067
H0351.2001	Head of Caudate Nucleus, Left	-0.049224	-0.0793386	-0.039456	0.0425705	0.0310864	0.00724807	0.0250501	0.0623574	-0.00347716	0.019907	0.00772697	0.0267899	-0.0215838	-0.00462786	-0.0171063	-0.0228558	-0.0450236	-0.0327398	0.000725497
H0351.2001	Head of Caudate Nucleus, Right	-0.0547838	-0.0829042	-0.0808609	0.0328193	0.0266399	-0.00810163	0.0458213	0.0751419	-0.0202678	0.0223247	-0.0264862	0.0763294	0.00524558	0.0544517	-0.0112824	-0.00201672	-0.0426691	-0.00351384	-0.00116311
H0351.2001	frontal operculum, Left	0.00248723	0.0113455	0.000349696	-0.00381729	0.0162417	-0.00307412	-0.0154031	0.014371	-0.0185612	0.00708567	-0.00805275	0.0147935	0.0261794	0.0277762	-0.0517738	-0.0177	-0.0452678	-0.0311607	0.00199553
H0351.2001	Short Insular Gyri, Left	0.00056082	0.0139	0.0252047	0.0159189	0.00858002	0.00363379	-0.0257812	-0.00335364	-0.0136898	0.0014135	0.0142083	-0.00601669	-0.0188357	-0.00440492	-0.0402467	-0.0456069	-0.0404752	-0.0399804	0.0119592
H0351.2001	Putamen, Left	-0.0471443	-0.0910211	-0.0887664	-0.00546759	0.0223057	0.0161515	0.0659726	0.0663431	-0.0387172	0.0123134	-0.039338	0.0462547	0.0341637	0.0396316	0.0164215	0.0084554	0.012166	0.0622815	-0.0394157
H0351.2001	middle frontal gyrus, Right, superior bank of gyrus	0.0391324	0.0319212	0.0222863	-0.00201215	0.0021954	-0.0172876	-0.0234009	-0.015632	-0.00957591	-0.000933182	0.0131158	-0.00957814	-0.00217229	-0.000556858	-0.00350836	-0.0205095	-0.021244	-0.0375522	0.0123582
H0351.2001	inferior frontal gyrus, opercular part, Right	0.0211982	-0.0103805	0.0371949	-0.0141361	-0.00705406	0.0135361	-0.0184983	-0.0342767	0.00107673	-0.0247984	0.0304464	-0.0547141	-0.0274304	-0.072667	0.0137142	-0.00349003	0.0490152	0.0193092	-0.0205816
H0351.2001	Heschel's gyrus, Right	0.0132388	-0.00222587	0.0190049	-0.0144303	-0.0107819	0.021721	-0.019481	-0.0244091	-0.00363422	0.00511578	0.0125482	-0.0433115	-0.0180228	-0.0512592	0.0204699	0.00362417	0.0492278	0.0338501	-0.0373004
H0351.2001	transverse gyri, Right	-0.034976	-0.0249756	-0.000263731	-0.0260628	0.00968859	0.0317591	0.0360466	-0.0248076	-0.0136548	-0.00617067	0.00304188	-0.00576697	0.0152939	-0.0221958	0.0175294	0.00234149	0.0367857	0.0375045	-0.0280699
H0351.2001	planum temporale, Right	0.0305403	0.0224954	0.017553	-0.0057087	0.0103577	-0.00325079	-0.0312339	0.00105923	-0.00474583	0.0110765	0.0154334	-0.00129392	-0.00763968	-0.00713663	-0.0167277	-0.011025	-0.0275366	-0.0327987	-0.00203947
H0351.2001	Short Insular Gyri, Right	-0.0125181	-0.0128937	0.0253769	0.00724406	0.0183831	0.0279654	-0.0215911	-0.0202968	-0.0292787	-0.00481216	-0.00854674	-0.0208707	-0.0130809	-0.0363731	0.0345113	0.0150449	0.0419832	0.0200213	-0.0197054
H0351.2001	inferior temporal gyrus, Left, bank of the its	-0.00771193	0.00385907	0.0283217	0.0204079	0.0059487	-2.01232e-05	-0.0306673	-0.0115162	-0.00533769	0.0098534	0.0328865	-0.0217243	-0.0420095	-0.0273807	-0.0269484	-0.0380828	-0.0275476	-0.0441054	-0.0231089
H0351.2001	fusiform gyrus, Right, bank of the its	-0.0306967	-0.0134953	-0.000420073	-0.0145112	-0.0088393	-0.000439075	0.0177163	-0.0409259	-0.0237099	-0.0217249	0.00188095	-0.00492946	-0.0417805	-0.0157854	0.022349	0.0352406	0.0299773	0.0162155	-0.0290889
H0351.2001	fusiform gyrus, Right, lateral bank of gyrus	-0.0350592	-0.00376425	-0.00243198	0.00251859	-0.0171504	-0.0234102	-0.00744496	-0.0344088	0.0120299	-0.0278514	-0.00804555	-0.0173099	-0.0016623	-0.00744475	0.024773	0.0232503	0.0378308	0.0317822	0.0176576
H0351.2001	fusiform gyrus, Right, bank of cos	-0.0125837	0.00395637	0.0396722	0.0304402	0.0235619	0.0283579	-0.0169082	0.00112851	-0.00458796	0.00612153	0.0265271	-0.0121516	-0.0327466	-0.0234282	-0.0173677	-0.0491257	-0.0510188	-0.0670224	0.0136776
H0351.2001	parahippocampal gyrus, Right, lateral bank of gyrus	-0.0225455	0.00731998	-0.0416466	-0.0125927	-0.0264567	-0.03933	-0.00283776	0.0112969	-0.0444481	-0.0248923	-0.0664167	0.0073485	0.0243945	0.0328259	0.0235696	0.0093027	0.0270536	0.043031	-0.0296241
H0351.2001	parahippocampal gyrus, Right, bank of the cos	-0.00713791	0.0143876	-0.0412881	-0.0226284	-0.0412472	-0.029347	0.0113485	0.011179	-0.0438521	-0.0113472	-0.0445434	0.00713142	0.00514914	0.0249322	0.0405918	0.0159077	0.0273913	0.0392423	-0.0264703
H0351.2001	superior frontal gyrus, Left, lateral bank of gyrus	-0.00771382	-0.0280056	0.000462166	-0.0466965	-0.00117639	0.0172899	0.0464294	-0.0362299	0.000109258	-0.0178064	0.0293491	-0.00979074	-0.040821	-0.0486794	0.052155	0.065236	0.034484	0.0232706	-0.0307961
H0351.2001	inferior temporal gyrus, Right, bank of mts	-0.00612571	0.0169231	0.00573904	2.38697e-05	0.00895898	-0.0149473	0.00774786	-0.0182827	-0.0155646	-0.0110244	0.00132403	0.039708	-0.0123859	0.0122099	0.00548979	0.00358491	-0.036286	-0.0383735	-0.00548451
H0351.2001	middle temporal gyrus, Right, inferior bank of gyrus	0.00281119	0.0234881	0.0168651	0.0246746	-0.0171373	-0.00535238	-0.0123112	-0.00885101	0.0208644	-0.00482771	-0.0137634	-0.00460174	-0.01524	-0.0104943	0.0220051	0.00573346	-0.00331215	-0.0289567	0.0419361
H0351.2001	inferior temporal gyrus, Left, bank of mts	-0.00205182	0.0116309	0.0231809	0.00696255	0.0228921	0.0169916	-0.012769	-0.00322869	-0.0183408	-0.02227	-0.000829207	0.0109478	-0.00462542	-0.00284187	-0.033566	-0.0434939	-0.0446514	-0.0442023	-0.0105774
H0351.2001	middle temporal gyrus, Left, inferior bank of gyrus	0.0122176	0.0254691	0.0574693	0.0324856	0.00937714	0.0330811	-0.0236041	-0.0324797	-0.00756277	0.00595792	0.0264887	-0.0272503	-0.0253634	-0.0310285	-0.0102706	-0.0551016	0.00509995	-0.0372389	-0.00774758
H0351.2001	Head of Caudate Nucleus, Right	-0.0517482	-0.07269	-0.060306	0.0526779	0.0286716	0.019769	0.0374416	0.0745987	-0.0188535	0.0327475	-0.02025	0.0578562	-0.00647758	0.0460664	-0.049593	-0.0374633	-0.083063	-0.0391408	0.00578154
H0351.2001	Putamen, Left	-0.0460011	-0.0729575	-0.0757068	0.0108162	0.0276145	0.0316199	0.0745487	0.0846684	-0.0269297	0.0486727	-0.0122717	0.0565124	0.0242237	0.0564879	-0.0345864	-0.0360197	-0.0754047	-0.0226146	-0.00216545
H0351.2001	VI, Left Paravermis	0.00964973	-0.00159072	-0.0029286	-0.0429407	-0.0130811	0.010694	-0.0181754	-0.0351587	-0.00840226	0.0292872	0.0181451	0.0270661	-0.0224729	-0.0107352	-0.0177114	-0.0115591	0.00155278	0.0268026	0.00100615
H0351.2001	Head of Caudate Nucleus, Left	-0.0381068	-0.0509373	-0.00490562	0.0578602	0.0208987	0.00160331	0.0139137	0.0386917	0.00634089	-0.0151258	0.00556073	-0.018493	-0.0233542	-0.0337139	0.0322325	0.0020305	0.0110239	-0.0103644	-0.0142196
H0351.2001	Putamen, Left	-0.0408821	-0.0254398	-0.0228849	0.0627526	-0.0049166	-0.0339552	0.00123506	0.02918	-0.0421804	-0.0533262	-0.0536895	-0.0106987	0.0104298	0.00824888	0.0305893	0.0255587	-0.00651656	-0.0108323	-0.0436832
H0351.2001	Nucleus Accumbens, Left	-0.0481259	-0.0266802	0.00625632	0.070219	0.0132528	-0.0273633	-0.0245986	0.0167785	-0.0336416	-0.0499613	-0.0321431	-0.0149643	-0.0266006	-0.0148246	0.0157083	-0.00724141	0.0111043	-0.0313655	-0.0462009
H0351.2001	Head of Caudate Nucleus, Right	-0.0364365	-0.0150627	-0.0347388	0.0587363	-0.0206912	-0.0402439	0.00629766	0.0296764	-0.0415417	-0.0550751	-0.0580726	-0.00784889	-5.71688e-05	0.0259187	0.025069	0.0190739	-0.0261135	-0.0094327	-0.0228784
H0351.2001	Putamen, Right	-0.0388944	-0.0273166	-0.0411616	0.0512376	0.0041662	-0.0455462	0.000827528	0.0363506	0.0218357	-0.0378441	-0.0432277	0.0122496	0.0305525	0.0224526	0.0338117	0.0265326	-0.0173438	0.00368825	0.062082
H0351.2001	Head of Caudate Nucleus, Left	-0.0301908	-0.037556	-0.0208807	0.0473407	0.0122105	0.00594332	0.0354848	0.0607153	-0.017295	-0.0144875	-0.0127409	-0.0197355	-0.00463857	-0.00178226	0.0304538	-0.0179637	-0.0361516	-0.0463946	-0.0453487
H0351.2001	Head of Caudate Nucleus, Right	-0.0407288	-0.0460506	-0.0236018	0.0449626	0.0104375	-0.0133445	0.0219084	0.055787	-0.0161399	-0.0355215	-0.0136049	-0.0153327	-0.011781	-0.0144749	0.0191317	0.0133266	-0.00180976	-0.0162285	-0.0328117
H0351.2001	angular gyrus, Left, superior bank of gyrus	0.0227823	0.0527735	0.0332114	0.035803	-0.03013	-0.0487836	-0.0403563	-0.0124267	-0.0311632	-0.0621061	-0.0433467	-0.0601746	0.0151166	-0.0147202	0.0259327	0.0292552	0.0406883	-0.0192825	-0.0298719
H0351.2001	planum temporale, Left	0.0125524	0.0310175	0.00228506	0.0190108	0.000442629	-0.0457257	-0.0234647	0.0107665	0.0239907	-0.0414935	-0.0214866	-0.0261193	0.048599	0.0141936	0.00427195	0.0409279	0.011373	-0.012442	0.0450199
H0351.2001	III, Right Paravermis	0.014547	0.0125101	-0.0147117	-0.0438393	-0.00183045	0.0246249	-0.0129457	-0.0274189	-0.0560986	-0.01068	-0.0590884	0.0883561	-0.0145706	0.0284443	-0.0610124	-0.000272696	0.00241329	0.0398881	-0.00299249
H0351.2001	paracentral lobule, anterior part, Right, superior bank of gyrus	0.0383786	0.055415	0.0106799	0.0209178	-0.0415036	-0.0446736	-0.00608003	0.00314593	-0.0316457	-0.0471041	-0.0374934	-0.062014	0.0147667	0.00466183	0.0162597	0.0238093	0.0252228	-0.00979035	-0.0352529
H0351.2001	post central gyrus, Left, superior lateral aspect of gyrus	0.0533198	0.0644565	0.0312316	0.0280614	-0.0429454	-0.0200435	-0.0291338	-0.0148023	-0.0437808	-0.0436084	-0.0502555	-0.0474882	-0.024355	-0.0114249	0.0124088	0.00226344	0.00772447	-0.0493427	-0.0298093
H0351.2001	VI, Right Lateral Hemisphere	0.00608083	-0.00908055	0.0095104	-0.0371049	-0.000833579	0.0183626	-0.0196304	-0.0326835	0.0067052	0.0476498	0.0393613	0.00910386	-0.0256862	-0.0254686	-0.0140449	-0.0160287	-0.0112748	-0.00363048	0.0171775
H0351.2001	Crus I, Right Lateral Hemisphere	0.00407491	0.00131561	-0.00695429	-0.0399407	-0.0168845	0.0203481	-0.0226595	-0.0399191	-0.0167621	0.0471199	0.00417516	0.0352203	-0.0189941	-0.00152312	-0.0081561	-0.0161863	-0.0128632	0.0322691	0.00508169
H0351.2001	Crus II, Right Lateral Hemisphere	0.00425136	0.00203383	-0.00204562	-0.0390737	-0.00240861	0.0140568	-0.0183025	-0.0330669	-0.0124536	0.0512813	0.0253509	0.0509327	-0.0180355	0.00272864	-0.0121009	-0.0354619	-0.0553633	-0.018589	0.0199561
H0351.2001	VIIB, Right Lateral Hemisphere	0.0017692	-0.00774355	0.00205641	-0.0412803	-0.00304184	0.0184109	-0.0226659	-0.0394037	0.000780786	0.0473158	0.0334054	0.0183537	-0.0119739	-0.0180837	-0.0176024	-0.0138008	-0.00661325	0.0194883	0.00844915
H0351.2001	VIIIA, Right Lateral Hemisphere	0.000145603	-0.00845113	0.00406227	-0.0455132	-0.00329957	0.0258744	-0.0269356	-0.0494457	-0.00934592	0.050762	0.0303261	0.0216763	-0.0206126	-0.0151207	-0.0123464	-0.0327561	0.00853822	0.0258933	0.00975157
H0351.2001	Head of Caudate Nucleus, Left	-0.0409125	-0.0321101	-0.0128531	0.0674107	0.00424595	-0.0418039	-0.00179822	0.0331985	-0.0263548	-0.0476361	-0.0237098	-0.0286336	-0.0103306	-0.000514881	0.0163732	-0.00692727	-0.000803532	-0.0189839	-0.0390705
H0351.2001	Putamen, Left	-0.0422488	-0.0256577	-0.0126743	0.0692327	0.00179302	-0.0298017	-0.00239104	0.0290454	-0.043872	-0.0544333	-0.0478768	-0.00340571	-0.0253887	0.00878797	0.0389761	0.0020145	-0.00754365	-0.0295604	-0.038034
H0351.2001	Head of Caudate Nucleus, Right	-0.0421668	-0.0436726	0.00559117	0.0667142	0.0173628	-0.0100352	0.00914124	0.0353068	-0.018356	-0.047034	-0.00782115	-0.0326471	-0.0264493	-0.032005	0.0153459	-0.00760541	0.0129427	-0.0338152	-0.0430817
H0351.2001	Putamen, Right	-0.0440811	-0.0277694	-0.0247513	0.0642718	-0.0068336	-0.0518402	-0.00678611	0.0234704	-0.0306034	-0.0640592	-0.048403	-0.0136268	0.00690716	0.00512079	0.0324574	0.039792	-0.00401412	-0.00760845	-0.016801
H0351.2001	I-II	0.021467	0.016456	-0.0269057	-0.0438654	-0.0467839	0.000223611	-0.01324	-0.0332892	-0.0218031	0.0437453	0.000194513	0.0202044	-0.0101002	0.0226762	-0.032634	-0.00843392	-0.0148976	0.0360529	0.0174859
H0351.2001	III	0.0276442	0.0124593	-0.0203057	-0.0387434	-0.0387718	-0.00699492	-0.00866272	-0.0294318	-0.01124	0.0497471	0.0164551	-0.00165963	-0.00555975	0.00467822	-0.0251143	-0.00232204	-0.0334349	0.0269665	0.00912083
H0351.2001	IX	-0.0022742	-0.0139277	0.00486116	-0.0478535	-0.0137086	0.021821	-0.022542	-0.0511552	0.00519189	0.0496047	0.0459664	0.00709454	-0.0279305	-0.0292802	-0.049149	-0.0440871	0.00335974	0.0209425	0.00635542
H0351.2001	III	0.0204537	0.00983378	-0.0196907	-0.0365141	-0.0377696	0.00639837	-0.0133853	-0.0253017	-0.0116662	0.046862	0.0140312	0.00436405	-0.0278495	0.0110652	-0.0424989	-0.00963641	-0.0393446	0.012335	0.00377469
H0351.2001	IV	0.0161318	0.00738269	-0.0235267	-0.0426046	-0.0455303	-0.000127535	-0.0121969	-0.0346407	-0.0196973	0.0351351	-0.00083864	0.0177907	-0.0177994	0.00387002	-0.00730693	-0.000845258	-0.0118653	0.0435361	0.0204846
H0351.2001	V	0.0134097	0.00405185	-0.00181021	-0.041511	-0.0171475	0.0157039	-0.0126719	-0.038683	-0.00287335	0.0539381	0.0368057	0.0172424	-0.0282283	-0.00501565	-0.0356025	-0.0499209	-0.0346735	-0.00417045	0.0116153
H0351.2001	VI	0.0139048	0.0118153	-0.0140396	-0.0380819	-0.0232698	0.0247394	-0.0248095	-0.0211138	-0.0436697	0.0251091	-0.0318463	0.0559405	-0.0224839	0.0188276	-0.0383113	-0.0286317	-0.0104135	0.039081	0.00721317
H0351.2001	VIIAf	0.0123904	0.000884429	0.00461726	-0.035306	-0.0070539	0.0341655	-0.02087	-0.0308494	-0.0187367	0.0453785	0.011728	0.0308019	-0.0356045	-0.00585006	-0.033999	-0.0246543	-0.0170696	0.00140898	0.00565726
H0351.2001	VIIAt	0.0105278	-0.0121116	0.00354596	-0.0485051	0.00712942	0.0391707	-0.0211714	-0.0432787	0.0244443	0.0958473	0.0569131	0.0394949	-0.021697	-0.0232561	-0.0180153	-0.0294374	-0.0273822	0.0175008	0.05354
H0351.2001	VIIB	0.0190611	0.00865175	-0.0149371	-0.0391879	-0.0308436	0.00393076	-0.0187665	-0.0327825	-0.014509	0.0424333	0.00942962	0.0149924	-0.00448807	0.0046813	-0.0360448	-0.0069336	-0.018683	0.0287829	0.0193666
H0351.2001	VIIIA	0.00893335	0.00273004	-0.000173154	-0.0410157	-0.00444222	0.0369277	-0.0234255	-0.045905	-0.0322194	0.0465528	-0.00145631	0.0413503	-0.0258803	0.00294359	0.00422129	-0.0277045	-0.0185988	0.0246611	0.00358199
H0351.2001	VIIIB	0.0145958	0.00707446	-0.0184655	-0.042328	-0.0348735	0.011692	-0.0124495	-0.0390187	-0.0233442	0.0263981	-0.00852254	0.0240962	-0.0150925	0.0114556	-0.0276053	-0.000993911	-0.0166198	0.0361253	0.0150973
H0351.2001	IV, Right Paravermis	0.00695941	-0.0052002	0.00554817	-0.0487644	-0.0129604	0.00398179	-0.00463021	-0.0294993	0.00331778	-0.0127883	0.0189575	-0.0129821	-0.0245364	-0.020801	-0.0869756	-0.0580539	-0.0158845	-0.00432872	0.0127588
H0351.2001	V, Right Paravermis	0.0154781	0.0105275	-0.00841839	-0.0396858	-0.00391973	0.0166758	-0.00493242	-0.0314434	-0.0321204	0.0346308	-0.00883999	0.0570244	-0.0152978	0.0168106	-0.00585194	-0.0280528	-0.0288793	0.0112766	0.0122075
H0351.2001	VIIIB, Right Paravermis	0.00405021	-0.00745483	0.00869138	-0.0406208	-0.000953052	0.0157629	-0.0142766	-0.0364258	0.0130403	0.0439625	0.0508878	0.00983748	-0.0156454	-0.0206926	-0.024338	-0.0496283	-0.0365163	-0.0239179	0.0293581
H0351.2001	IX, Right Paravermis	-0.000251469	-0.00451448	-0.00827231	-0.0478281	-0.0168926	0.0185068	-0.0123141	-0.0491517	-0.0131334	0.0375079	0.0123835	0.033126	-0.0203779	-0.00647891	-0.0308907	-0.0160681	0.00449035	0.04609	-0.00104463
H0351.2001	VI, Right Paravermis	0.0105829	-0.00910935	0.0111398	-0.0364762	-0.00252201	0.01914	-0.02946	-0.0300923	0.00997364	0.0441129	0.0410638	0.00503294	-0.0233383	-0.0312337	-0.0229558	-0.0203404	0.00835229	0.011505	0.00816614
H0351.2001	Crus I, Right Paravermis	0.00957371	-0.0151372	0.0044054	-0.0447432	0.0141713	0.0355249	-0.00290719	-0.0342951	0.0393538	0.0845554	0.0579726	0.0271974	-0.0217617	-0.0305606	-0.0293703	-0.0237565	-0.0162496	0.00857291	0.0698287
H0351.2001	Crus II, Right Paravermis	0.00380501	-0.0109204	0.0152214	-0.0405214	0.0016443	0.0310665	-0.0143822	-0.0360791	0.00722817	0.0605895	0.0522174	-0.00967452	-0.0280486	-0.0293302	-0.0721059	-0.0494206	-0.0213355	-0.0150256	0.0156946
H0351.2001	VIIB, Right Paravermis	0.00161003	-0.0103071	0.00305694	-0.0450229	-0.00389378	0.0165754	-0.0150014	-0.0392858	0.00302379	0.036941	0.0328465	0.0121717	-0.0177271	-0.023961	-0.023629	-0.00748846	0.0175341	0.0262222	0.00453188
H0351.2001	VIIIA, Right Paravermis	0.00314631	-0.0118643	0.00623676	-0.0432627	-0.00608964	0.0129441	-0.0203706	-0.043892	0.00859365	0.0519235	0.049273	-0.00799942	-0.0190457	-0.0293224	-0.0340324	-0.0361141	0.00160705	0.0150146	0.0124174
H0351.2001	Crus I, Left Lateral Hemisphere	0.00313869	-0.0168933	0.00942449	-0.0417565	-0.00275517	0.0177711	-0.0200451	-0.0361784	0.00830935	0.0502306	0.0485006	-0.0171252	-0.010281	-0.0392441	-0.0233238	-0.00713935	0.0147391	0.019374	0.00635277
H0351.2001	Crus II, Left Lateral Hemisphere	0.00573905	-0.00965586	0.0067025	-0.0399351	-0.00107622	0.0198392	-0.0204458	-0.0402056	-7.52939e-05	0.0420342	0.0347145	0.00665375	-0.0173382	-0.0215047	-0.0212607	-0.0158038	-0.000779836	0.0130445	0.00737002
H0351.2001	VIIB, Left Lateral Hemisphere	0.00331251	-0.00636494	-0.000203398	-0.0403933	0.000404479	0.0142441	-0.0193253	-0.0269952	-0.0116058	0.0323229	0.0174821	0.0248535	-0.0218825	-0.0135513	-0.00377852	-0.000824325	0.00628113	0.0204276	0.00226466
H0351.2001	VI, Left Lateral Hemisphere	0.00283603	-0.04006	0.0242793	-0.0627604	0.0256449	0.0548496	-0.00288089	-0.039264	0.037384	0.089778	0.104543	-0.00405299	-0.0470433	-0.0676684	-0.0374879	-0.051739	0.0130469	0.0120581	0.0220609
H0351.2001	III, Left Paravermis	0.014386	0.0013959	-0.00859782	-0.0410377	-0.020796	-0.00195139	-0.0244993	-0.0324901	-0.00677784	0.0352751	0.0209859	0.00928649	-0.0145941	-0.0113254	-0.0128617	-0.000192661	0.00569746	0.0331312	0.0155233
H0351.2001	IV, Left Paravermis	0.0145133	0.0117332	-0.00637735	-0.0400931	-0.0157563	0.0105165	-0.0142979	-0.0328936	-0.021363	0.0430185	0.0180152	0.0438783	-0.0242624	0.0154286	-0.0373093	-0.0483211	-0.0349759	-0.0053671	0.00896495
H0351.2001	VIIB, Left Paravermis	0.00644847	-0.0104828	0.00339821	-0.0399103	0.000916323	0.0180768	-0.0116025	-0.0317632	0.00286945	0.0495578	0.0336466	0.00632868	-0.00920119	-0.0218972	-0.0166595	-0.00106725	-0.0082845	0.0124977	0.0108334
H0351.2001	VIIIA, Left Paravermis	0.0154713	-0.006316	0.00621181	-0.0357396	0.0163284	0.0345525	-0.00733025	-0.0333112	0.0638211	0.0860338	0.0619995	0.0321923	-0.00829385	-0.0258043	-0.0193244	-0.00343108	-0.00683056	0.0230161	0.130336
H0351.2001	VIIIB, Left Paravermis	0.00150308	-0.00949092	0.00692551	-0.0435936	-0.00936757	0.0125108	-0.0289973	-0.0565049	0.00648863	0.0492117	0.0412637	0.00269071	-0.0227141	-0.0296747	-0.0213214	-0.0225759	0.00277637	0.0247252	0.0170582
H0351.2001	IX, Left Paravermis	0.00328834	-0.00452904	-0.000790555	-0.0430809	-0.00573039	0.0103462	-0.0228191	-0.0333013	-0.00440388	0.0474884	0.0289053	0.0140496	-0.00700576	-0.0153552	-0.0249472	-0.0295549	-0.00503042	0.0242764	0.00533821
H0351.2001	V, Left Paravermis	0.0103519	0.00556861	-0.0107595	-0.0379705	-0.0183357	0.0109788	-0.0214254	-0.0399289	-0.0160589	0.0306558	-0.00467918	0.031056	-0.0225404	-0.00187295	-0.0130378	-0.00612711	-0.00995918	0.0358039	0.000891381
H0351.2001	Crus I, Left Paravermis	0.00761051	-0.0104308	0.00495319	-0.0390487	-0.00390509	0.0133987	-0.0121095	-0.0273893	0.00910632	0.049047	0.0409188	-0.00551775	-0.0132279	-0.0298996	-0.0210624	-0.00823262	-0.00916624	0.00238016	0.0108163
H0351.2001	Crus II, Left Paravermis	-0.00188529	-0.0181821	0.00448495	-0.0437601	0.00199391	0.0162894	-0.00541726	-0.0323713	0.0140904	0.0411872	0.0500549	0.00241792	-0.0227545	-0.0341403	-0.00944174	0.0034083	0.00679494	0.0149493	0.0106355
H0351.2001	post central gyrus, Right, bank of the central sulcus	0.0405896	0.0547472	0.0276663	0.0182311	-0.0397046	-0.0101907	0.00718385	-0.00311815	-0.0367641	-0.055667	-0.0357558	-0.0534158	-0.0190375	-0.0097431	-0.00631651	-0.0171825	0.0139063	-0.0455424	-0.0334809
H0351.2001	Nucleus Accumbens, Right	-0.0410607	-0.00548274	-0.00374456	0.0573132	0.00373345	-0.036886	-0.0161615	0.020078	-0.0322198	-0.0483736	-0.0426846	-0.0194436	0.0179665	0.00690132	0.0034329	-0.00255616	-0.00770705	-0.0289126	-0.0155645
H0351.2001	frontal pole, Left, superior aspect	0.0113827	0.05174	0.037124	0.0364916	-0.036353	-0.037831	-0.0397997	-0.0250942	-0.0398942	-0.0755721	-0.0539073	-0.0414134	-0.0225962	-0.019982	0.0290229	0.0110582	0.040318	-0.0306431	-0.0299087
H0351.2001	superior temporal gyrus, Left, inferior bank of gyrus	0.00223192	0.0387094	0.0378321	0.0412523	-0.0273805	-0.0418182	-0.0342203	-0.0139496	-0.0258758	-0.0664345	-0.0380617	-0.0596029	-0.00440509	-0.0302646	0.0296597	0.0194348	0.0405702	-0.0287862	-0.0392937
H0351.2001	Head of Caudate Nucleus, Right	-0.0358705	-0.0228194	-0.0409948	0.0506452	-0.0139165	-0.0364784	0.0177404	0.0388857	-0.0406602	-0.0440881	-0.0544052	-0.0136187	0.0275411	0.0225023	0.0340158	0.0345846	-0.00963018	0.00505578	-0.0508511
H0351.2001	Putamen, Right	-0.0337896	-0.019938	-0.0512481	0.0431444	-0.0141721	-0.0403047	0.0268614	0.0493743	-0.0373958	-0.0422813	-0.0536998	0.00743791	0.0431532	0.0384036	0.0407153	0.0422562	-0.0412154	-0.0150558	-0.0364181
H0351.2001	globus pallidus, external segment, Right	-0.00711676	-0.0284498	-0.0273998	-0.0381788	0.0715972	0.0133652	0.066081	0.0780403	-0.0250988	-0.0413852	-0.0165709	0.0214196	0.0381107	0.03598	0.0296961	0.0256314	0.0106459	0.0051743	-0.029828
H0351.2001	Putamen, Left	-0.0334957	-0.0237381	-0.043337	0.0404122	-0.00646652	-0.0234711	0.031331	0.0475318	-0.0301251	-0.0405369	-0.042209	-0.0115459	0.0499075	0.0274782	0.0123713	0.0275882	-0.030836	-0.00800611	-0.0295537
H0351.2001	Head of Caudate Nucleus, Left	-0.0342326	-0.0285392	-0.0468213	0.0438243	0.00338949	-0.0348365	0.0156107	0.0432023	-0.00680233	-0.0283053	-0.041795	0.0183479	0.0212761	0.0299565	0.0458407	0.0286672	-0.0123382	0.011273	0.00181297
H0351.2001	Putamen, Left	-0.0390662	-0.0277308	-0.0610633	0.0302466	-0.020312	-0.0444059	0.0278674	0.0502759	-0.039098	-0.0528004	-0.0571524	-0.00431631	0.0552761	0.0328126	0.0418563	0.0600338	-0.0268638	0.00548601	-0.0473781
H0351.2001	globus pallidus, external segment, Left	-0.0339654	-0.0441042	-0.0544868	-0.0513279	0.0680918	0.0181834	0.0715729	0.0848759	-0.00763191	-0.0136653	-0.0177887	0.0527474	0.0711746	0.051901	0.0597695	0.0496303	-0.00136127	0.0334972	-0.00580593
H0351.2001	Head of Caudate Nucleus, Left	-0.0375738	-0.026012	-0.0227021	0.066889	-0.00739841	-0.0507749	-0.00655764	0.0312308	-0.0318304	-0.047516	-0.0425998	-0.0140487	0.00530743	-0.00242734	0.0445039	0.0381836	-0.00693723	-0.0103493	-0.0428
H0351.2001	globus pallidus, external segment, Left	-0.0128156	-0.0404263	-0.0189735	-0.0187649	0.0757	0.0463325	0.0732484	0.0781894	-0.0293871	-0.0195019	-0.00584866	-0.0184349	0.0371293	0.0186325	0.0206857	0.00833229	0.0116934	-0.0091088	-0.0756781
H0351.2001	globus pallidus, internal segment, Left	-0.011359	-0.0287378	-0.0239557	-0.0367886	0.0723609	0.00782162	0.0661838	0.0644312	-0.0176168	-0.0492049	-0.0169388	0.0228186	0.0521159	0.0338862	0.018372	0.0188703	0.00193508	0.00143543	-0.03649
H0351.2001	globus pallidus, internal segment, Right	-0.0137342	-0.0301913	-0.00839504	-0.031434	0.0842591	0.0303272	0.0794585	0.0607061	-0.0234074	-0.0326612	0.00145236	0.0352023	0.0566829	0.0307192	0.0112691	-0.0292542	-0.0210782	-0.045263	-0.0443086
H0351.2001	Head of Caudate Nucleus, Right	-0.0354313	-0.0242677	-0.0391128	0.0525403	0.000840503	-0.0419879	0.0170824	0.0520909	-0.0376888	-0.040081	-0.0393838	-0.0106498	0.0254014	0.0243745	0.0292438	0.0161224	-0.019148	-0.00964695	-0.0412844
H0351.2001	middle temporal gyrus, Right, inferior bank of gyrus	-0.00549633	0.0289848	0.0574203	0.0453683	-0.011032	-0.0196463	-0.0268075	-0.0112904	-0.00932523	-0.0690907	-0.0143447	-0.0681875	-0.0332221	-0.054349	0.0129016	-0.00724239	0.0484976	-0.0522299	-0.0302954
H0351.2001	supraparietal lobule, Left, superior bank of gyrus	0.027552	0.0485794	0.0458572	0.0378034	-0.017765	-0.0337355	-0.0374928	-0.000771349	-0.0130958	-0.0503202	-0.00639075	-0.0586672	-0.0183263	-0.021975	-0.01129	-0.0412646	-0.0065968	-0.0883342	-0.0264779
H0351.2001	Putamen, Right	-0.0359577	-0.0288937	-0.0406697	0.0381894	0.00434409	-0.0321707	0.0321558	0.0563533	-0.0337744	-0.0421171	-0.031304	-0.00967378	0.036538	0.0256399	0.0306313	0.0145433	-0.0114492	0.00390411	-0.0363449
H0351.2001	globus pallidus, external segment, Right	-0.035841	-0.0370504	-0.0572474	-0.0468002	0.0649318	0.0128841	0.0762551	0.0718946	0.00694917	-0.0132244	-0.0209163	0.0709879	0.0791962	0.0599997	0.0570802	0.0410095	-0.0146056	0.0190686	0.0197184
H0351.2001	inferior occipital gyrus, Right, superior bank of gyrus	0.044623	0.0701199	0.0143615	0.027001	-0.0643344	-0.0345448	-0.0293412	-0.00701802	-0.0300017	-0.0272065	-0.0320495	-0.051887	-0.040008	-0.0037874	0.0183196	-0.0310111	-0.00641383	-0.0459795	-0.055715
H0351.2001	inferior occipital gyrus, Right, superior bank of gyrus	0.0246036	0.0434805	0.0523064	0.0343239	-0.0222183	-0.0280421	-0.0412781	-0.0194675	-0.0136247	-0.0609123	-0.0197417	-0.0766287	-0.0153488	-0.0384794	0.0123999	0.00827706	0.0526756	-0.0343656	-0.0353971
H0351.2001	inferior occipital gyrus, Right, inferior bank of gyrus	0.0265331	0.0479529	0.021791	0.0254557	-0.0281306	-0.0572604	-0.0289866	0.00029477	-0.0164695	-0.0581933	-0.0216757	-0.0648423	0.0475035	-0.0121402	0.00639726	0.0245024	0.0176234	-0.0275585	-0.0416294
H0351.2001	superior frontal gyrus, Right, lateral bank of gyrus	0.016074	0.0436112	0.0459914	0.03984	-0.0219708	-0.0307775	-0.0345965	-0.00838769	-0.027504	-0.0618449	-0.0312256	-0.0636395	-0.0300439	-0.0292114	-0.0034625	0.000622104	0.0164338	-0.0619291	-0.0563178
H0351.2001	inferior frontal gyrus, orbital part, Right	0.0205098	0.0102043	0.0399722	0.0148546	-0.00708087	0.00530359	-0.0247673	-0.0195969	-0.0123004	-0.0136847	0.00951244	-0.0405299	-0.027936	-0.0560147	0.0323823	-0.00255767	0.0475991	-0.00415197	-0.0234239
H0351.2001	middle temporal gyrus, Left, superior bank of gyrus	0.0298579	0.0457466	0.0163372	0.0179425	-0.0310323	-0.00102079	-0.0234878	-0.00673907	-0.0318748	0.0033499	-0.0216102	-0.043144	0.0166449	0.015743	-0.0307544	-0.0824594	-0.090525	-0.0138709	0.0126414
H0351.2001	parahippocampal gyrus, Left, lateral bank of gyrus	-0.00925764	0.021185	-0.000704465	0.0181964	-0.0137476	-0.0229401	-0.0253513	-0.00533105	-0.0273952	-0.0181046	-0.0208421	-0.0220318	-0.0123125	0.00695381	-0.0626376	-0.0339864	-0.018858	0.00558797	-0.0142976
H0351.2001	parahippocampal gyrus, Left, bank of the cos	-0.00819652	0.00576837	0.0366289	0.02203	-0.0184483	-0.00380354	-0.0277965	-0.0347896	-0.00601505	-0.0320776	0.00142323	-0.0456974	-0.0375824	-0.049447	-0.00843224	-0.0164112	0.0453383	0.00770573	-0.0179461
H0351.2001	fusiform gyrus, Right, bank of cos	0.00598022	0.0103268	0.0281239	0.0162647	-0.0211655	-0.00956022	-0.0233014	-0.0331016	-0.0167359	-0.0246247	0.00500163	-0.0429323	-0.0284884	-0.043126	0.0276476	-4.7964e-05	0.0384129	0.00266672	-0.0383351
H0351.2001	middle temporal gyrus, Left, superior bank of gyrus	0.0034687	0.0175189	0.0268763	0.0174012	-0.0178307	0.0023957	-0.00896553	-0.0283871	-0.0227149	-0.0152253	0.000870177	-0.0209276	-0.0230033	-0.0280467	0.0130115	-0.0312443	0.00998241	-0.0223964	-0.0241748
H0351.2001	precentral gyrus, Left, superior lateral aspect of gyrus	0.0221386	0.0377206	0.0134869	0.012507	-0.0271131	-0.0247832	-0.0263038	-0.0236964	-0.0341134	-0.0395655	-0.0312421	-0.00445987	-0.0135088	0.00663338	-0.00219797	-0.00570717	-0.0127777	-0.0301044	-0.0037909
H0351.2001	post central gyrus, Right, inferior lateral aspect of gyrus	0.0172725	0.0269031	0.0137946	0.0143406	-0.022426	-0.020718	-0.0236951	-0.0119154	-0.0130724	-0.00680421	0.003958	-0.0231194	-0.0263447	-0.00791571	-0.0146353	-0.0275149	-0.0291064	-0.0420752	-0.00649534
H0351.2001	middle frontal gyrus, Right, superior bank of gyrus	0.00633571	0.0382086	-0.00229055	0.0102363	-0.0358103	-0.0409088	-0.0440602	-0.0333966	-0.0462688	-0.0622621	-0.0607978	0.000377929	-0.00261874	0.0162812	-0.00985038	-0.00322454	0.0276282	0.0169498	-0.0139359
H0351.2001	occipito-temporal gyrus, Left, superior bank of gyrus	0.00985059	0.0362153	-0.0124663	0.014989	-0.0469915	-0.0235831	-0.0157382	-0.0105757	-0.0365959	-0.000513808	-0.0266362	-0.00600983	-0.0209394	0.015083	-0.0225945	-0.0206687	-0.0444247	-0.0328499	-0.0101369
H0351.2001	Globose Nucleus, Right	0.0493415	-0.00945389	-0.0300066	-0.0722852	0.00177284	0.00322773	0.0487256	0.0237009	-0.002651	-0.0232519	-0.0351389	0.0332523	0.0397639	0.0352845	-0.043249	0.043678	-0.0175927	-0.00582426	-0.00176554
H0351.2001	inferior temporal gyrus, Left, bank of mts	-0.00120467	0.00813391	0.0333662	0.0184668	0.0029957	-3.6898e-05	-0.0181706	-0.0166155	-0.0112431	-0.0189745	0.00803792	-0.034088	-0.0260122	-0.0386014	-0.00177881	-0.0113254	0.0115568	-0.0155794	-0.0287538
H0351.2001	inferior temporal gyrus, Right, lateral bank of gyrus	-0.00392092	0.0109293	0.027346	0.0215381	-0.0150992	-0.0071382	-0.0233839	-0.0282665	-0.0197587	-0.0268896	-0.00932407	-0.0310576	-0.023521	-0.0363938	0.0377493	0.0073865	0.0399651	0.00366097	-0.0184779
H0351.2001	middle frontal gyrus, Right, inferior bank of gyrus	0.00746043	0.00894702	0.0190845	0.00732278	-0.0171742	-0.0072981	-0.00353338	-0.0242072	-0.0112062	-0.0207174	-0.00173575	-0.0259387	-0.00927032	-0.0321677	0.020187	0.00756785	0.0223164	-0.00432132	-0.0274992
H0351.2001	middle frontal gyrus, Right, superior bank of gyrus	0.0173557	0.0197739	0.0325337	0.0176516	-0.0102181	-0.0125283	-0.0346951	-0.0240783	-0.0157806	-0.0261748	-0.00428068	-0.0390992	-0.0284697	-0.0318082	0.000946884	-0.00858101	0.0141477	-0.0203592	-0.0221465
H0351.2001	globus pallidus, internal segment, Right	-0.015201	-0.0503463	-0.0310683	-0.0572056	0.0782427	0.0371899	0.063395	0.0558854	-0.00847713	0.000502991	-0.0055663	0.0576084	0.0227108	0.0230517	-0.00106826	0.0301269	-0.00240261	0.0158926	-0.00948583
H0351.2001	Lateral group of Nuclei, Left, Ventral division	0.0302318	-0.0113045	-0.0442402	-0.0533763	-0.0332204	-0.0444747	0.0183837	0.0511549	-0.0166525	-0.00811042	0.00381287	-0.0282213	0.0399849	0.00879802	-0.0189712	0.0465083	0.0128527	0.0272594	-0.0329933
H0351.2001	Medial Geniculate Complex, Left	0.0521919	0.0117685	-0.0446624	-0.0487417	-0.036296	-0.056949	0.0034032	0.0507312	-0.00815889	-0.0205293	-0.0255235	-0.000518101	0.0235675	0.0411748	-0.0357089	0.0355849	-0.0455514	-0.0361528	-0.0127812
H0351.2001	Amygdaloid Transition zone, Left	-0.0438023	0.0181527	-0.0569494	0.0211336	-0.044087	-0.0854822	-0.0423987	-0.0153527	0.0226977	-0.0680295	-0.105796	0.0222521	0.0868395	0.068214	-0.0247602	0.0727515	0.00676555	0.0415084	0.050758
H0351.2001	superior temporal gyrus, Left, lateral bank of gyrus	0.0181801	0.0207644	0.0312535	0.0153139	-0.0107955	-0.0139216	-0.0371426	-0.0296461	-0.00868545	-0.0177363	0.00610729	-0.0399696	-0.0235459	-0.0329459	7.4294e-05	8.93314e-05	0.0199319	-0.0156951	-0.0261282
H0351.2001	Dentate Nucleus, Right	0.0674875	0.0108422	0.0175777	-0.0346217	0.0151738	0.0292783	0.0158796	-0.0117511	-0.0197356	-0.0216726	-0.0438539	0.0074276	-0.0192158	-0.0103509	-0.0129573	-0.00147898	0.0154703	0.00174159	-0.0268962
H0351.2001	Emboliform Nucleus, Right	0.0303482	-0.037915	-0.00890833	-0.0836802	0.0562639	0.0472784	0.0724099	0.0132223	-0.0101135	-0.00888492	-0.0027213	0.0421261	0.0191335	0.000265262	0.00536905	0.0253873	-0.00493373	-0.00740577	-0.0164603
H0351.2001	CA2 field, Left	-0.000881442	0.0372009	-0.00470023	0.0239532	-0.0493065	-0.0348358	-0.0276643	-0.0364144	-0.0337187	-0.0115835	-0.0480603	-0.00741384	-0.00137906	0.0292126	0.000882115	-0.0190932	-0.019045	-0.00451613	-0.0223334
H0351.2001	CA3 field, Left	-0.0344429	0.00662282	-0.0717377	-0.00786361	-0.0630896	-0.120338	-0.0216143	-0.0283693	0.0350108	-0.0336103	-0.0500844	-0.00187296	0.105562	0.0436012	0.0707456	0.100351	-0.0623436	-0.00768841	0.0636935
H0351.2001	CA4 field, Left	-0.026106	-0.00247334	-0.068619	-0.0132709	-0.0467486	-0.0991795	-0.00291662	0.00256419	0.0387158	-0.029197	-0.0451794	-0.0232251	0.0894996	0.0389421	0.0392105	0.0861105	-0.040662	-0.0013787	0.072855
H0351.2001	Dentate gyrus, Left	-0.0390987	0.0328013	-0.0563061	0.0433955	-0.0988415	-0.0692521	-0.0541213	-0.088848	-0.0108877	0.0549781	-0.0190879	0.00793077	0.0185449	0.0623416	-0.00729335	0.0136538	-0.0507736	0.0436692	0.0309163
H0351.2001	subiculum, Left	-0.00702973	0.0188548	-0.0023323	0.0211764	-0.00381771	-0.0321657	-0.0289994	-0.0225621	-0.0140265	-0.0482665	-0.0545053	0.00747223	0.0324871	0.0125141	0.00471094	0.0152626	0.00756048	0.00229981	-0.0185881
H0351.2001	CA1 field, Left	-0.0224733	0.0124889	0.00854502	0.030318	-0.00127834	-0.0143564	-0.0375372	-0.0382503	-0.0378097	-0.0469504	-0.0480361	0.00694257	0.0275834	0.0114722	0.0107624	0.00299168	0.0461728	0.0339018	-0.042788
H0351.2001	CA2 field, Left	-0.0032374	0.0300997	0.0298447	0.0224028	-0.0218699	0.00432017	-0.0352729	-0.0548912	-0.0470421	-0.0589905	-0.0455386	-0.00743982	-0.0327749	-0.00274562	-0.00439193	-0.044464	0.0276009	-0.00972118	-0.0382949
H0351.2001	CA3 field, Left	-0.0166521	0.0233356	-0.0280219	0.0119674	-0.0501092	-0.0589491	-0.0281984	-0.0321903	-0.0220308	-0.0389866	-0.0547332	0.000104025	0.0750478	0.0314796	0.0295544	0.0486772	-0.0373727	-0.0180684	-0.0194278
H0351.2001	Dentate gyrus, Left	-0.0341053	0.0278316	-0.0530225	0.0276986	-0.0898654	-0.053938	-0.046775	-0.0809742	-0.0154822	0.0509192	-0.0182772	0.0211885	0.0102657	0.0568411	-0.000919086	0.0134922	-0.0432432	0.0405796	0.0298379
H0351.2001	Tail of Caudate Nucleus, Left	-0.0227662	-0.0427988	-0.0155147	0.0368677	0.0237655	0.00251956	-0.00352806	0.0202697	-0.028042	-0.0154831	-0.019461	0.0390722	-0.0222945	-0.0103555	-0.000406892	0.0120006	-0.0104417	-0.000234893	-0.0308963
H0351.2001	parahippocampal gyrus, Right, bank of the cos	-0.00781929	0.00372439	0.0307276	0.0233966	0.0332976	0.00575787	-0.0262373	0.00707873	0.00256328	0.00318606	0.0216706	-0.0168725	0.00935528	-0.0222483	-0.0164931	-0.0201091	-0.00422601	-0.0263754	0.00734279
H0351.2001	subiculum, Left	0.0119683	0.0103885	0.0364404	0.0260384	0.0049097	0.01179	-0.0172345	-0.0175595	-0.0197802	-0.00619725	0.0111321	-0.0270934	-0.024874	-0.0404678	-0.00867195	-0.033478	0.0240798	-0.0215722	-0.0223034
H0351.2001	CA1 field, Left	-0.0217221	0.00162504	0.0283291	0.035895	0.00253382	-0.0143886	-0.0365561	-0.0376898	-0.0180684	-0.0206665	0.0164672	-0.0321572	0.0211309	-0.0282023	0.0111405	-0.010921	0.0412367	0.00225172	-0.033231
H0351.2001	CA2 field, Left	-0.0223197	0.0103536	0.00977269	0.0323749	0.00179356	-0.0323923	-0.0272663	-0.0255951	0.0295828	-0.0401989	-0.021792	-0.00340123	0.00428005	0.00140546	0.00410133	0.00613687	-0.022152	-0.0257347	0.0475344
H0351.2001	CA3 field, Left	-0.0128575	0.0279308	-0.0180081	0.0179404	-0.0544091	-0.0436013	-0.0280414	-0.0398606	-0.0246674	-0.0119004	-0.0401616	-0.0105948	-0.00277173	0.0210033	0.0371595	0.0331215	-0.0200383	0.000426804	-0.00223619
H0351.2001	CA4 field, Left	-0.0156571	0.0119127	-0.0265757	0.00608134	-0.0441141	-0.0459918	-0.0146838	-0.0103693	-0.0225792	-0.0111109	-0.0224365	-0.0347482	0.0320587	0.00462268	0.0352323	0.0320172	0.00093607	0.0211503	-0.028496
H0351.2001	Dentate gyrus, Left	-0.0303793	0.0261688	-0.0364172	0.0318012	-0.0804374	-0.0361305	-0.0473147	-0.0778481	-0.028378	0.0414837	-0.0114368	0.0200246	0.0266049	0.0332079	0.0052149	-0.0136278	0.00551584	0.0494611	0.0146659
H0351.2001	Anterior Group of Nuclei, Left	0.00180798	-0.0349635	-0.00942739	-0.0516755	0.0392198	0.0314584	0.044496	0.053276	-0.00807454	0.00597685	0.0331069	-0.00338075	-0.0235705	-0.0299678	-0.0124612	-0.0120353	-0.0106469	-0.00837382	-0.0306121
H0351.2001	Medial Group of Nuclei, Left	0.0309307	-0.00971859	0.00898354	-0.0370721	0.0113815	0.0182971	0.0187863	0.0303692	-0.0218358	0.012802	0.0240065	-0.0244955	-0.0339797	-0.0242775	-0.0249551	-0.0272891	-0.0185241	-0.0329729	-0.0295212
H0351.2001	Lateral group of Nuclei, Left, Dorsal Division	0.0389692	-0.0139542	0.00992174	-0.0405981	0.00911125	0.0219514	0.0260034	0.0333368	-0.0165504	0.0273922	0.0388847	-0.0357492	-0.0297426	-0.0360207	-0.015344	-0.0428535	0.00459298	-0.0199162	-0.034215
H0351.2001	Posterior Group of Nuclei, Left	0.0320473	-0.00944252	0.00315159	-0.0450905	0.0101634	0.0147817	0.027187	0.0239971	-0.0270726	-0.000405899	0.0185393	-0.00929121	-0.03256	-0.0167332	-0.030061	-0.026226	-0.0184877	-0.0276931	-0.0277109
H0351.2001	Rostral Group of intralaminar Nuclei, Left	0.0247794	-0.0139411	-0.00100537	-0.0403786	0.00922473	0.0145658	0.0273992	0.0407851	-0.0132463	0.0256854	0.038517	-0.022391	-0.0305731	-0.019265	-0.0230125	-0.0257106	-0.0289617	-0.0337367	-0.0280338
H0351.2001	Superior Colliculus, Left	0.0270511	-0.0197226	0.00616591	-0.0472076	0.0212207	0.0394678	0.0452743	0.0367106	-0.0158754	0.0202515	0.0385075	-0.0116828	-0.0349448	-0.0276389	-0.0314619	-0.046527	0.000190859	-0.0103722	-0.0190562
H0351.2001	subiculum, Left	0.00685723	0.0110138	0.0172458	0.0154989	-0.0050622	-0.00138637	-0.0126414	-0.00586973	-0.0159489	-0.00508245	0.0149027	-0.0332097	0.0201002	-0.0246055	-0.0103294	-0.0295567	0.0195156	-0.00299807	-0.0279174
H0351.2001	CA1 field, Left	-0.0275008	0.0106775	0.00880627	0.0304523	-0.00355095	-0.0250505	-0.0324592	-0.0272133	-0.0336868	-0.0410069	-0.0252119	0.00856218	-0.00610129	0.00217128	0.0148569	0.00177512	0.00480309	-0.0100754	-0.0295131
H0351.2001	CA2 field, Left	-0.000845774	0.0195503	0.0254186	0.0305616	-0.029828	-0.0206553	-0.0290438	-0.0392203	-0.0103489	-0.00685222	0.0220652	-0.0523138	0.00459585	-0.0189634	0.0207328	-0.0106646	0.0181594	-0.020718	-0.0315329
H0351.2001	CA3 field, Left	-0.0316719	-0.0097829	-0.0640084	-0.0140701	-0.0363095	-0.0771783	-8.94571e-05	-0.00150526	0.0125141	-0.00348756	-0.0115919	-0.0266066	0.0835275	0.0237874	0.077265	0.0839805	-0.0303255	0.0423312	0.0172184
H0351.2001	CA4 field, Left	-0.0443001	-0.0469448	-0.0713591	-0.0358673	-0.0304492	-0.0732674	0.0158375	0.0231208	0.0660139	-0.015772	-0.0026386	-0.0436445	0.0933276	-0.0162122	0.0615338	0.0989244	-0.0191599	0.0198369	0.099047
H0351.2001	Dentate gyrus, Left	-0.0368949	0.0177521	-0.0574212	0.0219405	-0.0845387	-0.0566486	-0.0359653	-0.0562979	-0.00555307	0.0470804	-0.00537595	-0.00712684	0.0498422	0.0439538	-0.00382321	0.00972804	-0.0152497	0.0633285	0.0418794
H0351.2001	Substantia Innominata, Left	-0.00749738	-0.0224572	-0.0291574	-0.0360428	0.0123226	-0.00639918	0.0444714	0.0281658	-0.0190025	0.0117334	0.0189389	0.0111016	0.0286932	0.028062	-0.00234766	0.00156116	-0.0440866	-0.0170498	-0.00370354
H0351.2001	Central Nucleus, Left	-0.00120223	0.0195353	0.0315923	0.0276506	-0.0209683	-0.00240625	-0.0238913	-0.0314108	-0.0227148	-0.00895881	0.0156488	-0.0329371	-0.0297917	-0.0162108	-0.0127533	-0.0552394	-0.00642516	-0.0356271	-0.0278708
H0351.2001	Cortico-medial group, Left	-0.0221277	-0.0141881	-0.0342523	-0.0128048	-0.0118077	-0.0161179	-0.00589332	0.00966128	-0.0234062	0.000289894	-0.0252191	0.00822757	-0.00664231	0.0179151	-0.0139379	0.0157578	-0.0198296	0.0207567	-0.0116802
H0351.2001	Posterior Hypothalamic Area, Left	-1.98839e-05	-0.030907	0.00803532	-0.0377093	0.0316352	0.0323341	0.00708418	0.0186624	-0.0344093	-0.0273257	-0.0251692	0.0119055	-0.0307838	-0.0178918	-0.0245742	0.00752873	0.00949455	-0.00240386	-0.0262244
H0351.2001	Septal nuclei, Left	-0.0305095	-0.0262362	-0.0224511	-0.00973656	0.0280876	0.0167634	0.0216744	0.0178839	-0.0307828	-0.00239955	-0.0245065	0.0580828	0.016659	0.00154048	-0.0093088	-0.00189312	0.0170751	0.0299004	-0.0274074
H0351.2001	Septal nuclei, Right	-0.0223503	-0.0214034	-0.0217514	-0.0132017	0.0257374	0.0147738	0.0319816	0.0275111	-0.0341399	0.0106882	-0.00875189	0.0421825	0.0268857	0.0169411	-0.0395926	-0.022747	-0.0447653	-0.0212177	-0.0180276
H0351.2001	Substantia Innominata, Left	-0.0337295	-0.0298168	-0.00705454	0.0262857	0.0031063	-0.00701523	-0.0140451	-0.0095541	-0.0208159	-0.00146096	0.00924061	-0.000250218	-0.0145546	-0.0236408	-0.0184225	-0.00391448	0.00338446	0.00926498	-0.00577128
H0351.2001	Substantia Innominata, Right	-0.0197375	-0.032849	-0.010447	0.0050673	0.0243934	-0.00488406	0.0161578	0.0128351	-0.0174128	-0.00188713	0.0204075	0.0181905	-0.01517	-0.010655	-0.014778	0.00335504	-0.0299499	-0.0222499	-0.0176613
H0351.2001	Preoptic Region, Left	0.00433791	-0.0373929	0.0368133	-0.0166945	0.016763	0.0517443	-0.00987113	0.0055052	-0.00360577	0.0408894	0.0482574	-0.0564659	-0.0445902	-0.0653544	-0.0407529	-0.046031	0.0110751	-0.0280435	-0.0157969
H0351.2001	Preoptic Region, Right	-0.00456622	-0.0137918	0.0013494	-0.0197129	0.0162166	0.0137627	-0.0124175	-0.00144256	-0.0109891	0.00331065	-0.0247903	0.026101	-0.00515363	0.00305757	0.0568831	-0.0107213	-0.0242406	-0.0208386	0.00814853
H0351.2001	Supraoptic Nucleus, Left	-0.0266246	-0.0620807	0.00887555	-0.0569533	0.0708984	0.035354	0.0162832	0.047124	0.00480041	-0.0347709	0.00723753	0.0689691	-0.0190966	-0.0343388	0.0425001	7.24838e-05	0.0523724	0.0122196	0.00338376
H0351.2001	Supraoptic Nucleus, Right	-0.0337177	-0.0433188	-0.00577791	-0.000644584	0.0584989	0.012211	0.0030309	0.0320271	0.0168718	-0.0152766	-4.99261e-05	0.0617998	-0.0115206	-0.00687878	-0.0291454	-0.0191934	-0.0363583	-0.0260669	0.0306864
H0351.2001	subiculum, Left	0.00681746	0.0166261	0.00521798	0.0131656	0.00314048	-0.0141216	-0.0182212	-0.0104868	-0.0249781	-0.0319954	-0.033659	0.00180562	0.00291267	-0.000263035	0.014089	0.00926287	0.00446969	-0.00161749	-0.0266344
H0351.2001	CA2 field, Left	-0.00512572	0.0224036	0.0256251	0.0210747	-0.0249542	-0.00420171	-0.039179	-0.0555488	-0.0298067	-0.0612149	-0.031946	-0.029784	-0.0272515	-0.0174298	-0.00120492	-0.0174254	0.0425874	0.0212072	-0.041934
H0351.2001	CA4 field, Left	-0.0152485	0.0157979	-0.0391604	0.00316934	-0.0407794	-0.0626891	-0.0159923	-0.0104621	0.0015126	-0.0286285	-0.048408	-0.0205826	0.0418756	0.0226388	0.0250994	0.0548576	-0.00318525	0.0210625	0.0227245
H0351.2001	Dentate gyrus, Left	-0.0317409	0.0217272	-0.0404703	0.0269714	-0.0680779	-0.0381189	-0.0416263	-0.0636144	-0.0188469	0.0267182	-0.010978	0.0173575	0.000254597	0.0348274	-0.0216212	0.0283939	-0.0438637	0.0194056	0.0215773
H0351.2001	Lateral group of Nuclei, Left, Ventral division	0.0387665	-0.0239861	0.00676264	-0.0453097	0.0303353	0.0392311	0.0352958	0.0276126	-0.022699	0.0102144	0.0147361	-0.033501	-0.011577	-0.0335791	-0.00695755	0.00420069	-0.00209798	-0.0233016	-0.0575097
H0351.2001	Dorsal Lateral Geniculate Nucleus, Left	0.0712194	-0.000395035	-0.00757244	-0.0644707	-0.0106303	-0.00388324	0.0271549	0.0413267	-0.00573046	0.030418	0.0306258	-0.0337905	-0.0166156	-0.00814401	0.0123299	-0.0138	-0.00716362	-0.0180126	-0.0170302
H0351.2001	central gray substance of midbrain, Left	0.003849	-0.0234028	-0.0266134	-0.0495717	-0.00488553	0.0128286	0.0259649	0.0461811	-0.0189439	0.0147472	0.00453087	-0.0244832	-0.00339385	-0.00460592	-0.0159039	0.00410393	-0.0100559	0.0158541	-0.014015
H0351.2001	Pretectal Region	0.00320423	-0.026448	-0.028196	-0.0577941	0.00786262	0.0263189	0.0586153	0.0426581	-0.0241058	0.0321824	0.0150147	0.0112403	-0.00625816	0.0135653	0.00401078	0.00046419	-0.0288884	-0.00140625	-0.0131646
H0351.2001	subiculum, Right	-0.00181254	0.00665215	0.0382245	0.0336396	0.0103587	-0.00753164	-0.0174584	-0.0180006	0.00775767	0.00223014	0.0473564	-0.0295729	-0.0191211	-0.0383162	-0.00570558	-0.0352956	-0.011172	-0.0532941	-0.0182487
H0351.2001	CA1 field, Right	-0.0205031	0.000305	0.0434355	0.0352602	0.00617994	0.00262873	-0.0307698	-0.0391838	-0.00424495	-0.0237658	0.0315409	-0.0410818	-0.0277498	-0.0463902	-0.0150363	-0.0291734	0.0233016	-0.0273565	-0.0389081
H0351.2001	CA2 field, Right	-0.00425957	0.0231692	0.0329965	0.0217274	-0.0223713	0.00281389	-0.0361513	-0.0563945	-0.0489505	-0.0530045	-0.0284565	-0.0207712	-0.0349565	-0.0176881	0.00467157	-0.0189121	0.0400809	-0.00517335	-0.0474588
H0351.2001	CA3 field, Right	-0.0105326	0.0195228	-0.0032132	0.0178127	-0.0417408	-0.0320791	-0.0223971	-0.0288665	-0.0290127	-0.0048661	-0.00325099	-0.0356419	-0.00556173	0.00236445	0.0270331	0.0038135	0.0198671	0.0170622	-0.0359541
H0351.2001	CA4 field, Right	-0.0126073	0.00881512	-0.0213503	0.00949125	-0.0359565	-0.0458578	-0.00836804	-0.00197076	-0.0137784	0.00398392	0.00481653	-0.0370094	0.0149681	0.00223824	0.019279	0.0295989	-0.0185355	-0.0010751	-0.00452418
H0351.2001	Dentate gyrus, Right	-0.0449368	0.0339257	-0.0255782	0.0873907	-0.0908075	-0.0426771	-0.0678146	-0.0861104	-0.0146745	0.0677698	0.0120955	-0.00666056	0.00237981	0.0262663	-0.00281718	-0.0145392	-0.00111839	0.0520547	0.0114003
H0351.2001	Tail of Caudate Nucleus, Right	-0.0203328	-0.051182	0.00938257	0.0419305	0.0419053	0.0214873	0.0100653	0.0337041	0.00756423	0.00884267	0.0420354	0.00805239	-0.0358543	-0.0337616	-0.0432871	-0.0531042	-0.0368207	-0.0435881	-0.0192428
H0351.2001	Medial Group of Nuclei, Right	0.0216821	-0.00864998	-0.00974049	-0.0467568	0.00790157	0.0139281	0.0230861	0.0389434	-0.0329822	0.000317389	0.00414121	0.00692014	-0.0303753	-0.0051108	-0.0134179	-0.00849656	-0.0266828	-0.0266518	-0.0174599
H0351.2001	Lateral group of Nuclei, Right, Dorsal Division	0.0369567	-0.010775	-0.00536189	-0.0504808	0.0165714	0.0126703	0.0209024	0.031202	-0.0375132	-0.00869501	-0.00363086	-0.000205382	-0.0210849	-0.0142266	-0.00228655	-0.00871222	0.0203041	0.00864041	-0.0368517
H0351.2001	Lateral group of Nuclei, Right, Ventral division	0.0398373	-0.00595563	-0.0152462	-0.053389	0.00853892	0.00942282	0.0275377	0.0355472	-0.0299181	-0.00964451	-0.0161335	0.0127848	-0.000819519	0.00543674	-0.016168	0.0252348	-0.0454764	-0.0453592	-0.0253311
H0351.2001	Posterior Group of Nuclei, Right	0.0288116	-0.0154112	0.0224268	-0.0314328	0.00698185	0.026737	0.0171828	0.0257654	-0.0168162	0.0128388	0.0345677	-0.0365045	-0.0400463	-0.0406144	0.00234948	-0.0194398	0.0134409	-0.0218954	-0.0336066
H0351.2001	Rostral Group of intralaminar Nuclei, Right	0.0123212	-0.023558	-0.00112069	-0.0482273	0.00343833	0.0109349	0.0294806	0.0293569	-0.00986763	-0.00216797	0.0264227	-0.0216666	-0.017371	-0.028045	0.0133208	-0.00781854	0.0269474	0.0159356	-0.0344198
H0351.2001	Caudal Group of Intralaminar Nuclei, Right	0.0111699	-0.0193454	0.00216556	-0.0431257	0.014653	0.0208138	0.0373928	0.0384224	-0.0152207	0.00663893	0.0366859	-0.00927167	-0.00339769	-0.0153116	-0.0260032	-0.0245291	-0.0256728	-0.0361285	-0.032982
H0351.2001	Medial Habenular Nucleus, Right	-0.02774	-0.0588928	-0.0106505	-0.0617769	0.0561101	0.0443748	0.0326382	0.04438	-0.0197685	-0.0137614	0.00725089	0.0658188	-0.0286714	-0.0218804	-0.0112646	-0.0201687	0.024525	0.0288164	-0.00176501
H0351.2001	Lateral Habenular Nucleus, Right	0.00345291	-0.0359684	-0.00850799	-0.0577461	0.0401866	0.042689	0.0553632	0.0481318	-0.00548565	0.0297594	0.0407445	0.0224814	-0.0226669	-0.00592502	-0.0363702	-0.0449013	-0.027508	-0.015936	-0.00790087
H0351.2001	central gray substance of midbrain, Left	0.00914778	-0.0175086	-0.00388111	-0.0359506	0.0252605	0.0254354	0.0186612	0.0393881	-0.0372442	0.012281	-0.00526215	0.0182808	-0.0319382	0.000875903	-0.0534683	-0.0290593	-0.0293489	-0.0206816	-0.00713576
H0351.2001	central gray substance of midbrain, Right	0.00663584	-0.0182256	-0.003485	-0.0390475	0.0120908	0.0220604	0.0127279	0.0351966	-0.0228154	0.0170867	0.0181129	-0.00331665	-0.0287756	-0.0101222	-0.0436308	-0.0447971	-0.00862526	-0.00511927	-0.0126553
H0351.2001	Pretectal Region	0.00291656	-0.0267983	-0.0260204	-0.0545477	0.0206293	0.018551	0.0415571	0.0432861	-0.0174756	0.0147912	0.00053867	0.0165455	0.00512274	0.00197146	-0.00375128	-0.000899657	-0.0090849	0.0225318	-0.0233876
H0351.2001	Lateral group of Nuclei, Right, Ventral division	0.0386436	-0.0203207	0.00966777	-0.0534329	0.0270704	0.0391534	0.0393123	0.0537307	-0.00815959	0.00772101	0.0397277	-0.0225032	-0.0386071	-0.0320684	-0.0423692	-0.0460827	-0.0183512	-0.0425761	-0.0243922
H0351.2001	subiculum, Left	0.00278035	0.0321563	-0.00928903	0.0131289	-0.004201	-0.000704195	-0.0130252	-0.00494336	-0.0116427	-0.0315701	-0.081907	0.0439395	0.00569632	0.0333403	-0.0440418	-0.0225938	-0.0344213	-0.0253579	0.00719617
H0351.2001	CA1 field, Left	-0.0391197	0.024566	0.00779799	0.080237	-0.00571314	-0.0372928	-0.0540955	-0.0262844	-0.0321467	-0.0449128	-0.0446735	0.0155706	0.0235333	0.0132847	-0.0104226	-0.00400861	0.0273981	0.015219	-0.0129858
H0351.2001	Basolateral Nucleus, Left	-0.02184	0.00124716	-0.0446146	-0.000958944	-0.00390114	-0.0627541	-0.00420892	0.00939808	0.072121	-0.0362897	-0.0455784	0.0405561	0.040318	0.0397555	0.056456	0.070504	-0.00469438	0.0218173	0.134616
H0351.2001	Lateral Nucleus, Left	-0.0283308	0.00174713	-0.0350446	0.00625091	-0.00603695	-0.0295576	-0.00841562	0.00117301	-0.0151849	-0.0222086	-0.0609088	0.0157895	0.0522726	0.0271653	-0.00419185	0.0276448	0.00510981	0.0350061	-0.00354589
H0351.2001	subiculum, Right	0.0198128	0.0162238	0.00999674	0.00608975	-0.0165281	0.00818523	-0.0142231	-0.00724493	-0.044116	-0.00769529	-0.0139879	-0.0271408	-0.00233946	-0.01993	-0.0187255	-0.0148936	0.0380238	0.0146315	-0.0340051
H0351.2001	CA1 field, Right	-0.0145111	0.0221201	0.0262956	0.0312936	-0.00893898	0.00618105	-0.0393217	-0.0495317	-0.0475342	-0.0508682	-0.0323546	0.000132833	-0.036827	-0.0020203	-0.0237603	-0.0249609	0.0253692	-0.00680362	-0.0379347
H0351.2001	CA2 field, Right	-0.00462668	0.0343945	0.0106642	0.0225096	-0.0324547	-0.0227527	-0.0286326	-0.0555468	0.038397	-0.0596333	-0.0597306	0.00720021	-0.0109132	0.0056455	0.0247915	0.0136635	0.0354851	0.00314802	0.065616
H0351.2001	CA3 field, Right	-0.00607383	0.0314109	0.0175156	0.0233299	-0.0371297	0.000501284	-0.0372874	-0.0530793	-0.0489901	-0.045939	-0.045379	0.00503186	-0.0382512	0.00412563	-0.015171	-0.00384857	-0.00647126	-0.0205554	-0.0366105
H0351.2001	CA4 field, Right	-0.00315628	0.0231426	-0.0042538	0.0213967	-0.0529495	-0.0149726	-0.0315343	-0.0367157	-0.0404248	-0.0113728	-0.034352	-0.0425189	-0.00387486	-0.00253579	0.00437343	0.0033309	0.0270293	0.0301774	-0.0332799
H0351.2001	Dentate gyrus, Right	-0.0216026	0.0318602	-0.0255313	0.0521744	-0.0704256	-0.0263349	-0.0445654	-0.059063	-0.018997	0.0761704	0.0113444	-0.0147496	0.0198973	0.0323133	-0.01426	-0.0241906	-0.0253883	0.0360896	-0.0016183
H0351.2001	CA1 field, Right	-0.0187257	0.0167579	0.025115	0.0256514	-0.00451712	-0.0264526	-0.0376515	-0.0553457	0.00988507	-0.0769349	-0.0199615	0.0100927	-0.0329516	-0.0209736	0.0336158	0.022683	0.0248757	-0.0160322	0.0196217
H0351.2001	Dentate Nucleus, Left	0.0498255	0.0043938	-0.0060555	-0.0258478	-0.00604856	-0.000245519	0.0187688	-0.00815991	-0.00594762	0.0431345	0.0123488	-0.0211975	-0.0346006	0.00256366	0.0330866	0.023619	-0.0255184	-0.00172146	-0.0103511
H0351.2001	Fastigial Nucleus, Right	0.00725436	-0.0234824	-0.0149578	-0.0491877	0.0301652	0.0171322	0.0450125	-0.00584611	-0.0256349	0.000759622	-0.0122625	0.0380283	-0.0143248	0.00809949	0.0101728	0.0176097	-0.00315262	0.007198	-0.0274798
H0351.2001	Dentate Nucleus, Left	0.0502635	-7.54717e-05	0.0111766	-0.0320715	0.00327184	0.0190788	0.0189472	-0.00508968	-0.0347284	0.0190884	0.0141678	-0.00735989	-0.034086	-0.0141648	-0.00715263	-0.00229341	0.00667503	-0.00617619	-0.0393377
H0351.2001	Dentate Nucleus, Right	0.0392388	-0.00918266	0.0116467	-0.0455225	0.019494	0.01789	0.0241174	-0.00641827	-0.0416968	0.00568757	0.012254	0.00951895	-0.051516	-0.0235908	0.0334978	-0.0167501	0.0204215	0.00968066	-0.0671063
H0351.2001	Claustrum, Right	-0.0272738	0.0249774	-0.0042224	0.0312516	-0.0154434	-0.0497885	-0.0390318	-0.0405707	-0.0262206	-0.034699	-0.0347488	-0.00620425	0.00409427	0.0134592	0.0128417	0.00634918	0.00548966	0.0286026	-0.0309151
H0351.2001	Anterior Group of Nuclei, Right	0.00682221	-0.00201642	-0.0175508	-0.0184781	-0.00885636	-0.0128628	9.51973e-05	0.0172381	-0.0271352	0.00644882	0.00244152	-0.0142372	-0.00323529	-0.00335641	0.0227851	0.00758273	-0.00109698	0.0113175	-0.0329109
H0351.2001	Paraventricular Nuclei, Left of Thalamus, Left	-0.0635069	-0.0659219	-0.0130065	-0.029993	0.0221284	0.0041012	-0.00302196	0.0283268	-0.00797375	0.0249722	0.0708947	0.0318539	-0.0791392	-0.0246351	0.00456876	-0.0554924	-0.0743709	-0.0729585	0.00465442
H0351.2001	subiculum, Right	-0.00308463	0.0215445	0.00878069	0.0378051	-0.00811073	-0.00524283	-0.0306294	-0.0107447	-0.0537661	0.000712115	-0.00956123	-0.0339477	0.0416141	-0.00832161	-0.0466008	-0.0420555	0.0166399	0.00764303	-0.05974
H0351.2001	CA1 field, Right	-0.0207716	0.00993743	0.0407446	0.0657213	0.0127445	0.0226221	-0.0434911	-0.033403	0.00185634	-0.0150839	-0.00852489	-0.0431532	0.020148	-0.0387533	0.0295859	0.0007654	0.0405214	-0.0178086	0.00645234
H0351.2001	CA2 field, Right	-0.0201491	0.0357107	0.0269525	0.055077	-0.0390395	-0.0224791	-0.0595907	-0.0677643	-0.0609403	-0.0462737	-0.033502	-0.019662	-0.0222559	-0.00411211	0.0028351	-0.0231232	0.0264126	-0.00972002	-0.0651536
H0351.2001	CA3 field, Right	-0.0238632	0.0326069	0.0143449	0.053178	-0.0381664	-0.0322542	-0.0500739	-0.055099	-0.0402084	-0.0405522	-0.0314157	-0.0121962	0.000446269	0.00644058	0.0321283	-0.00548119	0.0175833	-0.00713137	-0.0326752
H0351.2001	CA4 field, Right	-0.0432851	0.00860416	-0.0533409	0.0116003	-0.0372113	-0.0695747	-0.0131664	-0.00713044	0.0129956	-0.031995	-0.0356898	-0.00272608	0.0975305	0.0353952	0.0262914	0.0420872	-0.0290443	0.0226444	0.0294551
H0351.2001	Dentate gyrus, Right	-0.0536728	0.0189931	-0.0544397	0.0426817	-0.0927532	-0.0831539	-0.0575337	-0.0764053	-0.00142116	0.00947925	-0.0166764	0.000140917	0.0302927	0.0264206	0.0408904	0.0530137	-0.0246954	0.0441743	0.0225792
H0351.2001	Tail of Caudate Nucleus, Right	0.00655298	0.00727266	0.0541004	0.0787388	0.0224067	0.0652782	-0.0205301	-0.0124419	0.0506027	0.0632677	0.0299197	-0.109189	0.037225	-0.071462	0.0345403	-0.0113724	0.022398	-0.0541442	0.0863473
H0351.2001	Lateral hypothalamic area, Left	-0.0112863	-0.00923918	0.00246713	-0.010794	0.00935162	-0.0219808	-0.00998696	-0.0154554	0.0102607	-0.0490071	-0.0185471	0.0162748	-0.0279291	-0.0150593	0.00110648	0.0242697	0.0134479	0.00457685	0.0164127
H0351.2001	Lateral hypothalamic area, Right	-0.00317468	-0.00726061	0.021135	-0.00522915	0.0085225	0.014923	-0.00471802	-0.00988641	-0.0375091	-0.0192214	-0.00334134	-0.0158074	-0.0267949	-0.0203194	-0.0436904	-0.0344405	0.0101372	-0.00960397	-0.0247364
H0351.2001	Posterior Hypothalamic Area, Left	-0.013796	-0.00752257	0.0265931	0.00470707	0.00790402	0.00681201	-0.0264025	-0.00923922	-0.0484236	-0.00871785	0.0260442	-0.000935653	-0.0307346	-0.01538	-0.0455654	-0.048533	-0.0469914	-0.0855458	-0.0442541
H0351.2001	Posterior Hypothalamic Area, Right	-0.00900459	-0.00116981	0.00417387	-0.00181676	-0.023049	0.00423137	-0.0240606	-0.0146056	-0.0503683	-0.00899077	-0.0295122	-0.0107482	0.0186118	-0.00265338	-0.0340566	-0.0201348	0.00760234	-0.000327795	-0.0415118
H0351.2001	Substantia Nigra, pars compacta, Right	-0.00437961	0.00376601	-0.00347884	-0.0121311	0.00532966	-0.0443424	-0.0175045	-0.00480254	0.0138843	-0.0568545	-0.0296701	0.033294	0.0140064	0.0053333	0.0275238	0.0244129	0.003668	-0.00974723	0.0196543
H0351.2001	Anterior Group of Nuclei, Left	-0.00262908	-0.015606	-0.0108736	-0.0247154	-0.00564953	-0.00804562	0.0168421	0.0122097	-0.0246799	0.00370326	0.0280163	-0.0289201	-0.0174341	-0.0242057	0.0118026	0.0105595	-0.00413437	0.0110716	-0.0483357
H0351.2001	Medial Group of Nuclei, Left	0.00453679	0.0116596	0.0015226	0.00961619	-0.0142696	0.00200724	-0.00203285	0.00513514	0.0267722	0.00146885	-0.0239281	-0.0187447	-0.00838721	0.0085219	-0.0304007	0.000832019	-0.00979782	-0.00943714	0.0359021
H0351.2001	Rostral Group of intralaminar Nuclei, Right	0.0117873	0.000850204	0.00765699	-0.0195266	-0.0125763	0.0122389	0.0197475	-0.016871	-0.0513659	-0.00543616	-0.00583377	-0.0104961	-0.0379535	-0.0092487	-0.0175879	-0.0185323	0.00677574	-0.00215295	-0.0441559
H0351.2001	Subthalamic Nucleus, Right	0.0363787	-0.00303988	0.0123472	-0.026011	0.0090815	0.0433472	0.0251979	-0.0130127	0.0140184	-0.000882845	-0.0310334	-0.02153	0.0360756	-0.0117972	-0.0405626	0.00412097	0.013988	-0.00408237	0.0296905
H0351.2001	Paraventricular Nuclei, Left of Thalamus, Left	-0.00954899	-0.0119162	-0.00742415	-0.00297472	0.00655179	0.00504454	-0.00481525	0.0154704	0.0248279	-0.00179741	-0.0212771	0.0175335	0.0129188	-0.00262964	-0.0468557	-0.021983	-0.033304	-0.0140985	0.0525984
H0351.2001	Paraventricular Nuclei, Right of Thalamus, Right	-0.0199401	-0.0263423	-0.0196407	-0.0203881	0.0107443	-0.00131577	-0.00252323	0.0169264	-0.0485144	-0.00907974	-0.0269119	0.0376997	-0.00456279	0.00331554	-0.0288204	-0.0280014	-0.00562791	0.00786343	-0.0334035
H0351.2001	central gray substance of midbrain, Left	-0.0101669	-0.00273132	-0.0294393	-0.0109385	-0.00308885	-0.0195008	0.00101807	0.0157132	0.0343855	-0.0171385	-0.0374861	0.0358762	0.0377997	0.0292874	-0.0285509	0.00818694	-0.0171445	0.015575	0.0638416
H0351.2001	ventral tegmental area, Left	-0.0128645	-0.00945899	-0.0203408	-0.0254622	0.00668609	-0.0101057	0.0174638	0.00911393	-0.037094	-0.0147843	-0.0217441	0.0188318	0.0475168	0.0164658	-0.0263583	-0.00651247	-0.0147059	-0.000317413	-0.0352128
H0351.2001	ventral tegmental area, Right	-0.00333823	-0.00382888	-0.0139473	-0.0123586	0.0170836	-0.00285384	0.028791	0.00952593	0.0588481	-0.0130859	-0.00664801	0.0047835	0.0168602	0.00697311	0.00139971	0.0374895	0.00430573	0.0136196	0.108539
H0351.2001	Anterior Group of Nuclei, Left	0.015594	0.00103947	-0.0205132	-0.026212	-0.0209943	-0.0185361	0.00330896	0.00500537	-0.0270384	-0.0209837	-0.0244384	0.00527832	-0.0105762	-0.00688835	0.0120385	0.0253227	-0.00251399	0.00840975	-0.0401645
H0351.2001	Medial Group of Nuclei, Left	0.00183441	-0.003261	-0.0240643	-0.0263337	-0.0217898	-0.0180071	0.00610773	0.0139312	-0.0437165	-0.00375305	-0.00396952	-0.00387735	-0.0229592	-0.00914429	0.0118017	0.0166494	-0.00681382	0.01432	-0.0470555
H0351.2001	Lateral group of Nuclei, Left, Ventral division	0.0381734	0.00951122	-0.00613467	-0.0248525	-0.00874777	0.0185369	0.0161238	0.00818771	0.00541409	-0.0198671	-0.0315262	-0.00721633	0.00623841	0.00376765	-0.030882	0.00888288	0.00697359	0.00147128	0.00543914
H0351.2001	Rostral Group of intralaminar Nuclei, Left	0.0300385	0.000510994	0.0154846	-0.013164	0.0120072	0.0376812	0.013201	0.0092933	-0.0186652	0.00280504	-0.00795178	-0.0249319	0.00513987	-0.0203814	-0.0624014	-0.0212646	0.00492437	-0.0307231	-0.0381802
H0351.2001	Anterior Group of Nuclei, Right	0.00411268	-0.00413344	-0.0243257	-0.033999	-0.0119511	-0.0167778	0.0158547	0.0168261	-0.0452151	-0.00930757	0.00399282	0.00354115	-0.0133585	-0.000805425	0.0324563	-0.00792884	0.00121687	0.0187543	-0.055769
H0351.2001	Medial Group of Nuclei, Right	0.0122587	0.00339484	-0.019955	-0.0172054	-0.0167135	0.00860745	0.0106577	0.0205	-0.00934849	0.0124003	-0.0192555	-0.00349918	-0.0414682	0.00298009	0.00953867	-0.00415258	-0.021427	-0.0112966	-0.00798735
H0351.2001	Lateral group of Nuclei, Right, Ventral division	0.0225589	0.00317637	0.00175906	-0.014373	-0.00510064	0.0224744	0.0119864	0.0169816	-0.0432326	0.0176527	0.00677623	-0.0226373	-0.0443799	-0.0149847	-0.00359467	-0.0294354	0.00200488	-0.0100958	-0.060355
H0351.2001	Rostral Group of intralaminar Nuclei, Right	0.0178595	0.00147658	0.00328793	-0.0290955	-0.0138904	-0.00500226	0.01221	-0.00231317	-0.0491661	-0.0238086	0.00869483	-0.00950133	-0.0174449	-0.00885533	0.00578617	-0.0302816	0.00729002	0.000783521	-0.0556639
H0351.2001	Caudal Group of Intralaminar Nuclei, Right	-0.00438104	-0.00248837	-0.0207966	-0.0284668	-0.00963776	-0.00234455	0.0275506	0.00623559	-0.0321643	-0.024353	-0.0227679	0.0205299	0.0133113	0.0135815	-0.0176362	-0.00660933	-0.0102659	0.0066268	-0.0368737
H0351.2001	Reticular Nucleus of Thalamus, Left	-0.0177202	-0.00342061	-0.0282154	-0.0162125	0.00865529	-0.0402998	0.000877801	0.00144451	0.0467688	-0.0387625	-0.0305554	0.0479774	0.0580374	0.0339214	-0.00197775	0.0196024	-0.0200939	-0.000712903	0.0871068
H0351.2001	Reticular Nucleus of Thalamus, Right	-0.00504641	0.00971868	-0.0222156	-0.0131013	-0.0485242	-0.0606797	-0.0154785	-0.0159171	0.00800835	-0.060492	-0.0407155	0.0181241	-0.0291513	0.0172652	0.0283896	0.0440434	-0.00875845	-0.00560843	0.0163163
H0351.2001	Paraventricular Nuclei, Left of Thalamus, Left	-0.0416621	-0.0704071	-0.00857425	-0.0248774	0.0465742	0.0807462	0.0181029	0.0517654	0.0321774	0.0896967	0.0608313	0.00279357	-0.0237114	-0.0285121	0.00424951	-0.0506852	-0.0482218	-0.0382917	0.0647398
H0351.2001	Paraventricular Nuclei, Right of Thalamus, Right	-0.0502115	-0.0551464	-0.0358727	-0.0394873	0.0435692	0.007194	0.00582095	0.0393068	-0.0305425	0.000427808	-0.000340434	0.0609655	-0.00201115	0.0100523	-0.0298194	-0.0233072	-0.0214739	0.0123537	-0.0184165
H0351.2001	central gray substance of midbrain, Left	-0.0181303	-0.00643428	-0.0429588	-0.0225398	-0.00667826	-0.0509817	0.00796977	0.0161532	0.0394035	-0.0258174	-0.031346	0.0405419	0.0575263	0.0363628	-0.0114954	0.0222145	-0.0468969	-0.000707866	0.0747221
H0351.2001	central gray substance of midbrain, Right	-0.00352983	-0.0146877	-0.00358147	-0.0209153	0.00383672	-0.00706275	0.00904666	0.017894	-0.0388705	-0.00660367	0.0190265	-0.00940116	-0.00534031	-0.0176939	3.36143e-05	-0.00423841	0.00075976	-0.00142415	-0.0437588
H0351.2001	Oculomotor Nuclear Complex, Left	0.00918114	0.00353039	-0.00984337	-0.0215732	-0.0299196	-0.0244109	-0.014224	-0.00684597	-0.037549	-0.0229593	-0.0219282	-0.00869052	0.016849	0.0111337	0.00545705	0.00382217	-0.00782249	-0.00761871	-0.033521
H0351.2001	Oculomotor Nuclear Complex, Right	0.00233236	0.00971244	-0.0173573	0.000129935	-0.0184202	-0.0380766	-0.00306457	0.00264056	0.0795752	-0.0191727	-0.00380251	0.00443153	0.0606714	0.024478	-0.00676233	0.0381507	-0.0272967	-0.0140327	0.150413
H0351.2001	Red Nucleus, Left	0.0087393	-0.0176635	-0.00712969	-0.028226	0.0216314	0.0592218	0.0484974	0.0437001	-0.00662276	0.0453385	0.00748843	-0.0276868	0.00562188	-0.0104965	0.0039012	-0.0198163	-0.0115347	-0.0143214	-0.0109884
H0351.2001	Substantia Nigra, pars compacta, Left	-0.0110866	-0.0200839	-0.0129095	-0.0255713	0.0318486	-0.0156553	0.00635879	0.0387581	0.00499343	-0.0278676	0.00444059	0.000854307	0.0148093	-0.00264323	0.00957907	0.0122403	-0.010244	0.00130059	0.00286933
H0351.2001	Claustrum, Right	-0.0221195	0.0275496	0.00721386	0.0298514	-0.0304407	-0.0254539	-0.0235239	-0.0559169	-0.0378074	-0.0202638	-0.0165674	-0.0227447	0.0205273	0.0115954	0.0150363	-0.00821666	0.0082582	0.0174208	-0.0479966
H0351.2001	Claustrum, Right	-0.0295729	-0.00421925	-0.00474652	0.0102906	-0.00272106	-0.011141	0.00649896	-0.0495399	0.0563814	-0.0252652	-0.0191769	-0.0202505	0.0336168	-0.0219622	0.0177823	0.0294779	0.0141333	0.00461103	0.0958847
H0351.2001	Dorsal Lateral Geniculate Nucleus, Left	0.0418483	-0.000644121	-0.0703473	-0.060077	-0.0470251	-0.0775921	0.0282649	0.0355772	0.0462597	-0.00510027	-0.0405261	0.0214097	0.0342554	0.0484056	0.0526602	0.0893522	-0.0268411	0.0101477	0.100651
H0351.2001	CA4 field, Right	-0.0287119	0.0250987	-0.0333966	0.0242304	-0.0401485	-0.0560924	-0.0163641	0.00300839	0.0129121	-0.00621769	-0.036906	-0.0129459	0.0394441	0.0365797	-0.0139602	0.00693525	-0.0401662	-0.0126679	0.030493
H0351.2001	Dentate gyrus, Right	-0.0419205	0.0470333	-0.0361846	0.0757347	-0.109455	-0.0667681	-0.0843805	-0.10884	-0.0315511	0.0368292	-0.0291758	-0.00448784	0.00347829	0.0414949	-0.000891743	-0.000144237	-0.0113747	0.0543191	-0.0083676
H0351.2001	Dentate Nucleus, Right	0.0576529	0.0132667	0.0187833	-0.0309322	0.00173367	0.0201804	0.0112764	-0.00832935	-0.0333244	0.0013895	-0.00902303	0.00285949	-0.0294929	-0.00835358	-0.00513059	-0.0152304	-0.00174187	-0.0220975	-0.0376972
H0351.2001	Fastigial Nucleus, Right	0.0248734	-0.0121316	-0.00460131	-0.0471413	0.0196087	0.0330741	0.0448686	0.0175273	0.00359432	0.00638544	-0.00277856	0.0343036	0.000459456	0.0117051	-0.00654276	-0.0062721	0.00062597	-0.0102499	0.000282667
H0351.2001	Emboliform Nucleus, Left	0.0337842	-0.0126064	0.00914076	-0.0483116	0.0375108	0.039219	0.042671	-0.00827446	-0.00689824	0.00772646	0.00388231	0.0322516	-0.0109063	-0.00144426	0.00589547	-0.00561945	-0.002212	-0.0177089	-0.00510045
H0351.2001	subiculum, Left	-0.00896294	0.0370062	0.00881549	0.0467862	-0.0366138	-0.031939	-0.0537975	-0.0454866	-0.0529121	-0.0435263	-0.0553415	-0.0102941	0.00300568	0.00777829	-0.0144637	-0.0137558	0.00430444	0.00121641	-0.0456898
H0351.2001	CA1 field, Left	-0.0238084	0.0386343	0.0116169	0.0646605	-0.0253272	-0.0303622	-0.0519695	-0.0532791	0.0162293	-0.0299006	-0.0552978	0.0164436	-0.00253054	0.0269468	-0.00188669	-0.0301715	0.000276022	0.00053651	0.0417317
H0351.2001	Tail of Caudate Nucleus, Left	-0.0287902	-0.0284374	-0.00662221	0.065799	-0.00768322	0.00644328	-0.0224578	0.00230096	-0.051532	0.00495442	-0.0114628	0.0174059	-0.0534544	-0.0175344	-0.0254707	-0.0396336	-0.0124807	0.0016777	-0.0490543
H0351.2001	Anterior Group of Nuclei, Right	-0.0073737	-0.0150736	-0.0129994	-0.0350139	0.0189944	0.0190097	0.0183745	0.0345238	-0.0376177	-0.00216163	0.00443996	0.0111278	-0.00367756	-0.0046525	0.00570035	-0.00269891	-0.00270728	-0.00619367	-0.0484894
H0351.2001	Lateral group of Nuclei, Right, Ventral division	0.0181755	0.000197531	-0.00742428	-0.029601	-0.0120035	0.00913627	0.0124092	0.0224942	-0.0524405	0.0112333	0.00591399	-0.0138347	-0.0287574	-0.00714669	-0.00976214	-0.011904	-0.0136555	-0.0020946	-0.0509224
H0351.2001	Rostral Group of intralaminar Nuclei, Right	0.0130065	0.00256693	-0.0109699	-0.0234774	-0.0336681	-0.0191296	-0.00957395	-0.00660706	-0.00344729	-0.0304897	-0.0253376	-0.00959014	-0.0239213	-0.0182984	0.0303733	0.0209951	0.00507273	-0.00808194	-0.014211
H0351.2001	Anterior Group of Nuclei, Left	-0.0137155	-0.0196385	-0.0290625	-0.0357954	0.00424799	0.00104298	0.0214064	0.0459377	-0.0246435	0.02787	0.0123351	0.0161178	0.0112718	0.0107726	0.00650391	-0.0120515	-0.0307796	-0.00713453	-0.0381338
H0351.2001	Medial Group of Nuclei, Left	0.00303412	-0.00531124	-0.0221736	-0.027648	-0.0246435	-0.00455815	-0.00015556	0.0187394	-0.030674	-0.0022746	-0.0206122	-0.000142172	0.0195866	-0.00229072	0.0105153	0.0138365	0.000848397	0.0124925	-0.0322664
H0351.2001	Lateral group of Nuclei, Left, Ventral division	0.0588144	0.0181485	0.00922023	-0.0263773	-0.0190476	-0.00718117	0.000309612	0.0103415	-0.034929	0.00487112	-0.00221783	-0.0174056	-0.0105307	-0.00329015	-0.00563281	-0.0237595	-0.0124456	-0.0353029	-0.0448296
H0351.2001	Rostral Group of intralaminar Nuclei, Left	0.0126772	-0.000328404	-0.0190921	-0.0296219	-0.0275577	-0.00635278	0.00451866	0.0203465	-0.0414876	-0.00179261	-0.0170826	-0.00114389	-0.0138725	0.000444109	0.0176949	0.0148522	0.00329498	0.00349391	-0.0416202
H0351.2001	Caudal Group of Intralaminar Nuclei, Left	-0.0049326	-0.00978268	-0.0107529	-0.0261912	-0.00497405	-0.0042564	0.0261517	0.0218836	-0.00713174	0.00349004	0.0244176	-0.00285167	-0.013638	-0.00147858	0.0203612	0.0192378	-0.0241927	-0.0222653	-0.00280322
H0351.2001	Claustrum, Left	-0.025689	0.016826	-0.0290877	0.0190817	-0.0110025	-0.0818717	-0.0289567	-0.0292739	0.050536	-0.0486867	-0.0404673	0.0107966	0.0759881	0.0465841	0.00986436	0.0393331	-0.0211594	0.0063499	0.0948809
H0351.2001	Medial Group of Nuclei, Right	0.00818758	-0.00273444	0.0200868	-0.00725368	-0.0121604	0.0114051	-0.0259087	-0.0169823	-0.0418762	-0.0218595	-0.0172675	-0.00576923	-0.0324126	-0.0339217	-0.00808881	-0.0180384	0.0285198	0.00999224	-0.0518413
H0351.2001	Lateral group of Nuclei, Right, Ventral division	-0.00893837	-0.010873	-0.0152445	-0.0261188	-0.0046733	0.011126	0.0140254	0.00941636	-0.0421076	-0.0183799	-0.0270803	0.024063	-0.0134297	0.00615237	-0.0199498	-0.0155089	-0.00531754	0.005699	-0.0354605
H0351.2001	Reticular Nucleus of Thalamus, Right	-0.0127201	-0.0250094	-0.00631366	-0.0443292	0.0197786	0.0418452	0.0511987	-0.0207005	0.0109833	-0.0156925	0.0178022	0.01646	-0.00478072	-0.00468436	-0.0234268	-0.00294189	0.00194805	0.0224901	0.0277747
H0351.2001	Paraventricular Nuclei, Right of Thalamus, Right	-0.0623091	-0.0795784	-0.0277187	-0.0445636	0.023074	0.0440157	-0.00278861	0.0350479	-0.0356566	0.0341269	0.0190516	0.0478158	-0.0369661	-0.00779128	-0.0190533	-0.0467084	-0.02825	0.00698402	0.0122637
H0351.2001	Substantia Innominata, Right	-0.0234841	-0.0177833	-0.0320622	-0.00535542	0.00499561	-0.0251475	0.00397362	0.0181106	-0.0131688	-0.00836007	-0.0090689	0.000960899	0.0101661	0.0156279	0.00656271	0.0281188	-0.013248	0.01209	-0.0111613
H0351.2001	Subthalamic Nucleus, Right	0.0279028	-0.00838538	0.0256092	-0.0327925	0.0134748	0.0394415	0.0177725	-0.0154577	-0.0472269	-0.0153725	-0.00390323	-0.00670768	-0.0162848	-0.0177882	-0.0263941	-0.029387	0.0218443	0.000145807	-0.0553772
H0351.2001	Substantia Nigra, pars compacta, Left	0.00858964	-0.00445747	0.0293472	-0.0135534	0.025496	0.0156065	-0.0203346	0.0022772	-0.0467917	-0.0461025	-0.0123269	0.00685763	-0.0290833	-0.0262506	-0.0129273	-0.00754675	0.0345674	-0.00185774	-0.0584986
H0351.2001	Lateral group of Nuclei, Left, Ventral division	0.0204134	-0.0196755	0.016815	-0.00902529	0.00785057	0.0440891	0.0192886	0.021535	-0.0195145	0.0633358	0.0469653	-0.0799467	-0.00679752	-0.0472207	0.0262251	-0.00113124	0.0112903	-0.013778	-0.0447137
H0351.2001	Anterior Group of Nuclei, Right	0.0223451	0.00326629	-0.0147362	-0.0208753	-0.0174324	-0.00386513	0.0122559	0.0130859	0.0188693	0.00484451	-0.00842796	-0.0135662	-0.00634847	-0.00442568	0.0217095	0.0147376	-0.0133272	-0.00458334	0.0405834
H0351.2001	Medial Group of Nuclei, Right	0.0201428	0.0114146	-0.00374916	-0.0132883	-0.0284802	-0.0235178	-0.00475294	0.00203441	-0.0296912	0.00990409	0.0107031	-0.00702151	-0.0352172	-0.00601693	0.0235818	-0.00264207	-0.0219916	-0.0275721	-0.0501104
H0351.2001	Lateral group of Nuclei, Right, Ventral division	0.0211438	0.00197824	-0.00902977	-0.0212639	-0.022044	-0.0460991	0.00626638	-0.0106902	0.016299	-0.00966062	0.00543769	-0.0192706	0.00338077	-0.00285455	0.0352488	0.0370986	-0.0204585	-0.0229487	0.0267441
H0351.2001	Reticular Nucleus of Thalamus, Left	0.00876732	-0.0117537	-0.00168817	-0.0271087	0.00404206	0.0067603	0.0247583	-0.00428266	-0.0291963	0.00322477	0.0167669	-0.00508708	0.00151997	-0.00787908	0.0150874	0.00679184	0.010105	0.00530393	-0.0402822
H0351.2001	Zona Incerta, Left	-0.00783321	-0.0271926	-0.00517922	-0.028158	0.0388029	0.0143525	0.0210803	0.0110873	0.0131994	-0.00365593	0.0129684	0.00481643	0.0122178	-0.0190255	0.018532	0.0383083	-0.000626895	-0.00285259	0.0170407
H0351.2001	Reticular Nucleus of Thalamus, Right	0.00769449	-0.0165303	-0.00859048	-0.0420782	0.0177057	0.0389064	0.0522964	-0.019832	0.00454889	0.00226903	0.00155562	0.00635321	0.00993505	0.016722	0.00279384	0.0107271	-0.00581079	0.000937205	0.00567757
H0351.2001	Zona Incerta, Right	-0.0106724	-0.0202871	-0.0308625	-0.0254438	0.0104561	-0.0268356	0.0414572	-0.0137929	0.0926119	-0.00563583	0.00403697	0.0546042	0.0393679	0.0250433	0.0417006	0.0513449	-0.00831623	-0.000519671	0.174047
H0351.2001	Subthalamic Nucleus, Left	0.0251927	-0.00919223	0.00490578	-0.0285401	0.0235646	0.000683668	0.00718021	0.0169934	-0.000618592	0.00334648	0.0154598	-0.00499246	0.00647099	-0.0089119	0.000109217	3.18443e-05	-0.00655059	-0.00482955	0.00136196
H0351.2001	central gray substance of midbrain, Right	0.00937572	-0.0165061	0.0157764	-0.00964215	0.00718158	0.022145	0.00302768	0.0234783	-0.0188547	0.0209382	0.0255253	-0.0470046	-0.0316741	-0.0420987	0.0163235	-0.0029276	0.00682673	-0.0106307	-0.020556
H0351.2001	Red Nucleus, Left	-0.00309169	-0.0197308	-0.0238818	-0.0387037	0.000900975	0.00687653	0.0337731	0.0213862	0.0298222	-0.00538275	-0.0109169	0.016455	0.00141696	0.00415169	0.00266233	0.0229932	-0.0172983	-0.00588605	0.0469839
H0351.2001	Red Nucleus, Right	0.00597878	-0.0239064	-0.00722345	-0.0367899	0.0206567	0.0324164	0.0392848	0.0385601	0.00819393	0.028866	0.0240585	-0.0138505	-0.0148656	-0.0175484	0.00810883	0.0122441	-0.0152472	-0.0116272	0.0129219
H0351.2001	Substantia Nigra, pars compacta, Left	0.0161923	0.00150175	0.025072	-0.0194044	0.00578606	0.00720252	-0.0145682	0.00930521	-0.0482236	-0.0352183	-0.0116105	0.00109855	-0.0201203	-0.0154125	-0.00535586	-0.00816732	0.0189239	-0.0109163	-0.0648727
H0351.2001	Substantia Nigra, pars reticulata, Left	-0.00942269	-0.0378037	-0.0157901	-0.0423643	0.0731888	0.00468401	0.0253988	0.0350121	0.0262893	-0.026161	0.00343218	0.0603048	0.0317089	0.00322163	0.0136879	0.0340244	-0.00336512	-0.00244632	0.0603316
H0351.2001	Amygdaloid Transition zone, Left	-0.0342371	0.00686354	-0.00528882	0.0280433	0.013444	-0.0128248	-0.0310183	-0.00468215	-0.0356045	-0.0308874	-0.028557	0.0140191	-0.00690239	0.00311822	-0.0233488	-0.013472	0.0179801	0.0239352	-0.0276668
H0351.2001	Basolateral Nucleus, Left	-0.0307786	0.0106313	0.000937192	0.040443	0.00356551	-0.0155241	-0.0387294	-0.0152889	-0.0387538	-0.0211659	-0.0246474	-0.00265755	0.00823122	0.00206134	-0.00496599	-0.00430551	0.0172486	0.0169172	-0.0550743
H0351.2001	Basomedial nucleus, Left	-0.0375878	0.00889061	-0.0363267	0.0186383	-0.0111905	-0.0430884	-0.0256458	0.00122138	-0.00670098	-0.0371497	-0.052513	0.0200103	0.0572778	0.0406712	-0.0249603	0.01705	-0.0288073	0.00961571	-0.00746444
H0351.2001	Lateral Nucleus, Left	-0.0234324	0.0196853	0.0101162	0.0437717	-0.00874729	-0.0241673	-0.0399549	-0.0137079	-0.0403767	-0.0161737	-0.00715826	-0.0144512	0.00319438	-0.00626198	0.00181617	-0.00493644	0.00855635	0.000942795	-0.0421632
H0351.2001	Lateral Nucleus, Left	-0.0225187	0.0158108	0.0160369	0.0438881	-0.000521699	-0.0113556	-0.0385908	-0.0119154	-0.0540765	-0.0191581	-0.0156994	-0.0135037	-0.0195267	-0.0123258	0.00244692	-0.00425899	0.0183349	0.00997683	-0.0597282
H0351.2001	Substantia Innominata, Left	-0.0122031	-0.00462017	-0.0146475	-0.00380751	0.0055387	-0.0138978	0.00159145	0.0130039	-0.02811	-0.00967792	-0.0163225	0.0141811	0.00204979	0.0224977	-0.0261138	-0.00857044	-0.0240858	-0.0108508	-0.0267627
H0351.2001	Central Nucleus, Left	-0.03473	-0.0098817	-0.012279	0.0203126	0.0139261	0.000231659	-0.011473	0.013403	-0.0403241	-0.00490295	-0.0125982	0.019797	0.013176	0.0142069	-0.060311	-0.0531802	-0.0293503	-0.0077844	-0.0411096
H0351.2001	Cortico-medial group, Left	-0.0577379	-0.055407	-0.0684092	-0.0211398	-0.0826436	-0.111447	-0.0475848	-0.0501029	0.060526	-0.0993458	-0.0391761	-0.0965368	0.00859885	-0.0789499	-0.0933665	-0.000479709	-0.0292448	-0.0394771	0.145346
H0351.2001	planum temporale, Left	0.0151519	0.013887	-0.013418	-0.0128917	-0.0133678	-0.0219636	-0.0230981	-0.0127043	-0.0156524	-0.00584028	-0.0111149	-0.0106258	0.0177661	0.00459528	0.0172686	0.0152422	0.020664	0.0228781	0.0284104
H0351.2001	planum polare, Left	-0.0220411	-0.00849204	0.0266288	0.011043	0.0154202	0.0248467	0.011092	-0.0111911	0.0114899	0.012292	0.036014	-0.0200582	-0.0380993	-0.0326513	-0.0257099	-0.0377179	-0.0156155	-0.0424542	-0.00236908
H0351.2001	Long Insular Gyri, Left	-0.0313729	-0.0168203	0.0243396	0.015652	0.0221416	0.000193852	-0.0283601	-0.0158205	-0.00127821	-0.0173385	0.0170463	-0.00892073	-0.0176912	-0.0390181	0.0569706	0.00321876	0.0446666	-0.00279424	-0.0176077
H0351.2001	superior temporal gyrus, Right, inferior bank of gyrus	-0.0107288	-0.00697526	0.0231951	-0.0112682	0.00743308	0.0386285	0.0301228	-0.0317339	-0.00749224	-0.00364967	0.0258657	-0.0112254	-0.0411921	-0.0355404	-0.00137633	-0.0175125	0.0467114	0.0104761	-0.0174417
H0351.2001	middle temporal gyrus, Right, superior bank of gyrus	0.00481836	0.0017621	0.0275443	0.0138484	-0.00798201	-0.00206755	-0.0211791	-0.0175991	0.00125703	0.00602618	0.0290433	-0.0322238	-0.0330757	-0.0569318	0.0496669	0.00366444	0.0351116	-0.00227041	-0.00362613
H0351.2001	middle temporal gyrus, Right, inferior bank of gyrus	-0.00235235	0.0102625	0.0278977	0.0110349	0.016601	0.0166368	-0.000800394	-0.0153467	-0.0110199	-5.22234e-05	0.00742177	-0.00355441	-0.00341555	-0.0134239	-0.0249049	-0.0343184	-0.017928	-0.0328108	-0.013823
H0351.2001	inferior temporal gyrus, Right, bank of the its	-0.00113863	0.00899802	0.0360637	0.0184047	0.0221731	0.0128098	-0.0200015	-0.00632122	-0.000610128	0.00534555	0.0238706	-0.0159497	-0.0246791	-0.0158773	-0.0422975	-0.0438814	-0.0225171	-0.0547852	-0.011312
H0351.2001	inferior temporal gyrus, Right, lateral bank of gyrus	0.0022064	0.0130929	0.0203663	0.0122703	0.0161776	0.0120238	-0.00925798	-0.0110596	-0.0171668	0.0081825	0.00630636	-0.00788679	-0.00685671	-0.00443234	-0.0351453	-0.0310593	-0.0227842	-0.0325088	-0.0234672
H0351.2001	inferior temporal gyrus, Right, bank of mts	-0.00527605	-0.001806	0.0243567	0.011192	0.0207331	0.00064246	-0.0295394	0.00196357	0.00179486	-0.0103306	0.0156146	-0.0162428	-0.0100208	-0.0264739	-0.000535206	-0.0162831	0.0084483	-0.0111391	-0.00722706
H0351.2001	superior temporal gyrus, Left, inferior bank of gyrus	0.000923207	0.0108844	0.00747455	0.00402317	-0.0103154	-0.0146015	-0.0196855	-0.0148316	-0.0119128	-0.0059006	0.00969605	-0.0161887	-0.0237487	-0.0142461	0.02086	-0.012139	-0.0137837	-0.0182046	-0.0164265
H0351.2001	middle temporal gyrus, Left, superior bank of gyrus	-0.0079829	0.016592	-0.0121267	0.00390999	-0.0213021	-0.0218289	-0.00940968	-0.0242679	-0.0396187	-0.0102294	-0.0299958	-0.00742103	0.00409445	0.00745656	0.015476	0.0170385	0.0166507	0.0284527	-0.020991
H0351.2001	middle temporal gyrus, Left, inferior bank of gyrus	-0.00889195	0.0266458	-0.00413345	0.0100673	-0.0112633	-0.0208828	-0.021625	-0.0139918	-0.04376	-0.0156365	-0.0254879	0.0099256	-0.0152736	0.0301719	-0.031512	-0.0345039	-0.038698	-0.0247972	-0.0019684
H0351.2001	Claustrum, Right	-0.0122548	0.0430672	-0.0322964	0.00352433	-0.0851471	-0.0595332	-0.0400401	-0.0490588	-0.0576899	-0.0370568	-0.0727101	0.00178529	0.0415919	0.0584657	-0.0398532	0.0226896	-0.00607775	0.0367354	-0.0388523
H0351.2001	Claustrum, Left	-0.0337102	0.0190069	-0.0549152	-0.0139049	-0.0673451	-0.0892429	-0.0338761	-0.0485738	0.00771902	-0.0857966	-0.101892	0.0284672	0.0846345	0.0590037	-0.0161914	0.0787321	-0.0156496	0.0294684	0.0205314
H0351.2001	supramarginal gyrus, Left, inferior bank of gyrus	0.0280454	0.0234655	0.0305023	0.0103383	-0.000392713	0.0106699	-0.0326261	-0.0218757	-0.0191253	0.00232013	0.00591574	-0.0254462	-0.0145694	-0.019593	-0.0256064	-0.0225055	-0.00517382	-0.0359291	-0.00759895
H0351.2001	superior frontal gyrus, Right, medial bank of gyrus	0.00616764	0.00530743	0.0411732	0.0177348	0.0119167	0.0155416	-0.0336465	-0.0056171	-0.00339201	-0.00485662	0.0196367	-0.0366603	-0.0249835	-0.0419297	-0.00495874	-0.0385469	0.000724055	-0.0372498	-0.00647033
H0351.2001	Claustrum, Right	-0.0249885	0.0247517	-0.0461337	-0.00781943	-0.0695678	-0.085799	-0.0507635	-0.0471879	-0.00383728	-0.106632	-0.117407	0.0455227	0.0617336	0.0457437	0.00940177	0.0754083	0.000306451	0.0314013	0.0104273
H0351.2001	Claustrum, Left	-0.0320984	0.0262474	-0.0502694	-0.0113299	-0.0671696	-0.0637116	-0.0282827	-0.044741	-0.0186271	-0.0747224	-0.0976914	0.0589877	0.0180598	0.0653049	-0.0291259	0.0562115	-0.0327181	0.0180796	-0.00837126
H0351.2001	Claustrum, Left	-0.043578	0.0200679	-0.0525627	-0.013538	-0.0476282	-0.0637883	-0.0132504	-0.0371542	-0.0113481	-0.0533111	-0.0905558	0.0579491	0.0167319	0.0683435	-0.0229438	0.0531763	-0.0390008	0.0233789	0.0210145
H0351.2001	Claustrum, Left	-0.0286673	0.0358356	-0.0662063	-0.00397921	-0.085892	-0.117462	-0.0452972	-0.0459482	-0.0216561	-0.0564157	-0.0974478	0.0152001	0.0739266	0.0806213	0.00820405	0.0675706	-0.0252715	0.0401149	-0.004497
H0351.2001	middle frontal gyrus, Right, inferior bank of gyrus	0.0327153	0.0124134	0.0332761	-0.00255696	0.000135095	0.00747807	-0.0164008	-0.0236715	-0.00357897	-0.0133565	0.0173146	-0.0235858	-0.0324072	-0.0369199	0.0376954	-0.00988194	0.011926	-0.0244449	-0.00911274
H0351.2001	superior frontal gyrus, Left, medial bank of gyrus	0.0169648	0.0225602	0.0161486	0.00567252	-0.0204398	-0.0069041	-0.0187296	-0.0112346	-0.0222241	-0.0167903	0.00521992	-0.013858	-0.0298289	-0.0109038	-0.0173211	-0.0402008	-0.0260759	-0.0436806	-0.0242137
H0351.2001	superior frontal gyrus, Right, medial bank of gyrus	0.0148775	0.0167587	0.0248727	0.0057966	-0.00277704	0.00867525	-0.000236488	-0.0140076	-0.018774	-0.00413823	0.0072882	-0.00895281	-0.0209091	-0.0188615	-0.00176807	-0.0239936	-0.017677	-0.0379814	-0.00679612
H0351.2001	Cingulate gyrus, frontal part, Left, superior bank of gyrus	-0.00264224	0.0159364	0.0147954	0.0184671	-0.0174182	0.0124297	-0.013001	-0.000849654	-0.0254387	0.00458606	-0.000301986	-0.0214968	-0.0354351	-0.00913821	-0.0439188	-0.0604222	-0.0291101	-0.0313135	0.00210104
H0351.2001	Cingulate gyrus, frontal part, Left, inferior bank of gyrus	-0.00126752	0.0117617	0.0303411	0.0161621	0.0117134	0.026326	-0.00905018	-0.00299342	-0.0259283	0.000710383	-0.000108707	-0.00987683	-0.0355049	-0.00938457	-0.0563578	-0.0679796	-0.0318682	-0.0422531	-0.00157374
H0351.2001	Cingulate gyrus, frontal part, Right, superior bank of gyrus	-0.0097361	0.00334135	0.0184141	0.011624	-0.00522521	0.0110676	-0.006896	-0.00192533	-0.0169141	0.00371069	0.0142223	-0.0197753	-0.0330328	-0.0206306	-0.0193965	-0.0325001	0.0109161	-0.0195822	-0.00724462
H0351.2001	Cingulate gyrus, frontal part, Right, inferior bank of gyrus	-0.0118833	-0.000509491	0.00873745	0.00532906	-0.00097843	-0.0204787	-0.0226296	-0.0101427	-0.0172826	-0.0236263	-0.00375322	-0.0115888	0.00162304	-0.0180545	0.0439052	0.0169785	0.0324708	0.0141545	-0.0145129
H0351.2001	superior frontal gyrus, Left, lateral bank of gyrus	0.0330598	0.0157008	0.0439288	0.0159187	0.0154458	0.0187415	-0.00994484	0.0010055	0.00108212	0.0248912	0.0335369	-0.0515603	-0.0240277	-0.0386325	-0.0452698	-0.0538123	-0.0266153	-0.0422326	-0.0034923
H0351.2001	middle frontal gyrus, Left, superior bank of gyrus	0.0311737	0.0175928	0.0386679	0.00570332	0.00534807	0.0143609	-0.0338674	-0.0244111	-0.0172156	-0.0158519	0.00272371	-0.0281567	-0.032964	-0.0290068	-0.000963501	-0.029835	0.0286927	-0.0221093	-0.0125697
H0351.2001	precentral gyrus, Left, bank of the precentral sulcus	0.0242464	0.0216677	0.010378	-0.00718109	-0.0183117	-0.0148047	-0.0151359	-0.0284966	-0.025017	-0.0327955	-0.0175557	-0.00350766	-0.0128978	-0.0121191	0.0301062	0.00495566	0.00464797	-0.00210734	-0.00985316
H0351.2001	precentral gyrus, Left, superior lateral aspect of gyrus	0.0290025	0.0217147	0.0285996	0.00953631	0.00456775	0.00286249	-0.0210636	-0.0150494	-0.0164756	0.00307502	0.00701322	-0.024001	-0.0107153	-0.0111982	-0.0245226	-0.033599	-0.0144471	-0.0396428	-0.0117705
H0351.2001	middle frontal gyrus, Left, inferior bank of gyrus	0.0243674	0.00725344	0.0221829	-0.00341476	-0.00724846	0.00425892	-0.00823251	-0.0123216	-0.00541783	-0.00168704	0.0192079	-0.0344456	-0.0255931	-0.0430495	0.0352228	-0.0127086	0.03266	0.000624384	-0.0221648
H0351.2001	precentral gyrus, Right, bank of the precentral sulcus	0.00399817	-0.00810901	0.0226861	-0.0137271	-0.00233859	0.0288417	0.0257804	-0.0293115	-0.00480938	-0.00390242	0.0279117	-0.0259999	-0.040663	-0.0432932	0.0158824	-0.00744653	0.0498025	0.0110474	-0.0282616
H0351.2001	precentral gyrus, Right, inferior lateral aspect of gyrus	0.0238999	0.00381204	0.0356863	0.00231399	0.00866149	0.0166612	0.00606176	-0.0132377	0.00564941	0.0204904	0.0366763	-0.0368793	-0.0281661	-0.0468468	-0.000489141	-0.0167455	0.0240215	-0.0179003	-0.00877362
H0351.2001	post central gyrus, Right, bank of the central sulcus	0.0317676	0.0229532	-0.00871832	-0.0172589	-0.0330218	-0.0081594	0.000231395	-0.00753955	-0.0245218	0.0156577	0.00630868	-0.0118418	-0.0234083	-0.00950364	0.0305479	-0.00495813	-0.0169408	-0.00942746	-0.00553304
H0351.2001	post central gyrus, Right, superior lateral aspect of gyrus	0.0259741	0.010179	0.0124442	-0.0143499	-0.0127206	0.0106285	-0.00628534	-0.0228873	-0.00794154	0.0096242	0.0203289	-0.0153352	-0.0363164	-0.0333714	0.00533242	-0.00466662	0.0394996	0.00485392	-0.00808624
H0351.2001	post central gyrus, Right, inferior lateral aspect of gyrus	0.0183034	0.00557202	0.0297287	-0.00282716	-0.000407299	0.0234568	-0.00747383	-0.0232351	0.00763248	0.0102865	0.0302264	-0.0300428	-0.0436751	-0.0404731	-0.0176965	-0.0435484	0.0213269	-0.0112788	-0.00160229
H0351.2001	Head of Caudate Nucleus, Right	-0.0571043	-0.0864717	-0.0494315	0.0369578	0.0272482	-0.00262694	0.0290704	0.0530327	-0.00871657	0.0297059	0.00817884	0.0191423	0.0096397	-0.0119149	0.0614997	0.0317992	-0.00742957	0.0303061	-0.0202127
H0351.2001	Putamen, Right	-0.0517968	-0.0731589	-0.0661942	0.0139971	0.0267181	0.00874853	0.0547311	0.0762323	-0.0239704	0.036846	-0.00523299	0.0445235	0.0598604	0.0376715	0.00168304	0.0049563	-0.0689992	-0.00815744	-0.0220471
H0351.2001	globus pallidus, external segment, Right	-0.0356862	-0.0822011	-0.0650795	-0.0766785	0.0748453	0.0455492	0.0943692	0.0939942	-0.0201331	0.0341237	0.00853079	0.0643963	0.0403494	0.0364792	0.0217221	0.0180265	-0.0175612	0.0418541	-0.0108202
H0351.2001	precentral gyrus, Left, inferior lateral aspect of gyrus	0.0187561	0.00831207	0.0195312	0.00156964	-0.0118977	-0.000156309	-0.0360572	-0.0224101	-0.00803754	-0.0098228	0.0101625	-0.0225003	-0.0133179	-0.0347943	0.0435537	0.000899424	0.0395753	0.00852783	-0.000710575
H0351.2001	superior temporal gyrus, Left, lateral bank of gyrus	0.0146723	0.0244707	-0.024797	-0.00734443	-0.00261981	-0.0433399	-0.0247383	-0.000434615	-0.0245874	0.00494796	-0.0240477	-0.00596493	0.0480498	0.031733	0.0145442	0.0225177	-0.00229247	0.0286302	0.00550516
H0351.2001	Heschel's gyrus, Left	0.027764	0.0302025	-0.00971536	-0.00768462	-0.0286991	-0.0132495	-0.0236353	-0.0217091	-0.028523	0.0123235	-0.0133715	0.00315969	-0.00496753	0.00220046	0.0347517	0.00365349	-0.0130917	0.000293453	-0.00930962
H0351.2001	inferior temporal gyrus, Left, lateral bank of gyrus	-0.00555977	0.00606253	0.0377571	0.020151	0.0152479	0.0200996	-0.0175164	-0.023099	-0.00800452	-0.00275752	0.0187151	-0.014998	-0.0384218	-0.0312711	-0.0147377	-0.0382785	-0.0106023	-0.0456913	-0.00197689
H0351.2001	Heschel's gyrus, Right	0.0421461	0.0387238	0.000191048	-0.0117417	-0.0344944	0.00428369	-0.0129747	-0.0206968	-0.0333141	0.0236261	-7.80619e-05	-0.00381071	-0.0387461	-0.00308207	-0.0246365	-0.0468664	-0.0299511	-0.0278372	0.00163196
H0351.2001	transverse gyri, Right	0.0334717	0.0168166	0.020848	-0.00886738	-0.014118	0.0237647	0.0036672	-0.0141992	0.0169795	0.0445173	0.0495219	-0.0486577	-0.0492032	-0.0380681	-0.0462809	-0.0549048	-0.0221929	-0.04019	0.00833085
H0351.2001	Short Insular Gyri, Right	-0.0158187	-0.00147217	0.038518	0.0214392	0.0309349	0.0185071	-0.0267182	-0.0151511	-0.00344992	-0.00104623	0.0209351	-0.00224083	-0.0405822	-0.0293649	-0.00370074	-0.038041	-0.00197777	-0.0427504	-0.00521629
H0351.2001	Head of Caudate Nucleus, Left	-0.0606356	-0.083167	-0.0510193	0.0293944	0.0298872	0.0217625	0.0423495	0.0639106	-0.0191664	0.0318979	0.00834614	0.0381324	-0.0259113	0.0139379	-0.026654	-0.0281152	-0.059323	-0.0150273	-0.0053089
H0351.2001	Putamen, Left	-0.0634454	-0.0769267	-0.0823778	-0.00383823	-0.00191438	-0.000507622	0.0571817	0.0564784	-0.039347	0.00665991	-0.0199924	0.049452	0.0630064	0.0349698	0.0462989	0.03173	-0.0182459	0.0435095	-0.0256098
H0351.2001	globus pallidus, internal segment, Left	-0.0268619	-0.086785	-0.0687484	-0.148332	0.088039	0.0474161	0.104249	0.0968873	-0.0241482	0.0216435	0.00184946	0.0866098	0.0341085	0.0444185	0.0374585	0.0278409	0.0109423	0.0559574	-0.0159847
H0351.2001	Claustrum, Right	-0.0363874	0.0241453	-0.0648877	-0.0171723	-0.0737341	-0.0874127	-0.0255961	-0.0429755	-0.00905565	-0.0763116	-0.109791	0.0460512	0.0610261	0.071396	-0.00153302	0.0692383	-0.0302825	0.0368788	0.0228086
H0351.2001	middle frontal gyrus, Left, inferior bank of gyrus	0.0367911	0.0112565	0.0405577	0.00638623	0.00749642	0.0124696	-0.00888085	-0.00826982	0.00535384	0.0168036	0.0331458	-0.0467335	-0.0301351	-0.0487299	-0.00928863	-0.0161692	-0.000500847	-0.0383802	-0.00183142
H0351.2001	inferior temporal gyrus, Right, bank of mts	-0.0131636	-0.000453914	0.0158033	0.00629605	0.00799305	-0.000491584	-0.0287863	-0.00876871	-0.0204438	-0.0227498	-0.00365347	-0.00494455	-0.00665525	-0.0217612	0.0271338	0.00493616	0.0290435	0.00743428	-0.0136651
H0351.2001	middle temporal gyrus, Right, inferior bank of gyrus	-0.0128686	-0.0129329	0.0377472	0.00771517	0.0250764	0.0227023	0.00955095	-0.00540424	0.0250962	0.00500406	0.0426957	-0.0390756	-0.0261241	-0.0448264	-0.0517114	-0.045663	-0.0120178	-0.040723	0.00717277
H0351.2001	inferior temporal gyrus, Left, bank of mts	-0.012621	0.020411	-0.00623171	0.00541985	-0.0176684	-0.0154607	-0.00797664	-0.0245796	-0.0437101	-0.0169041	-0.0304814	-0.00170184	0.00180389	0.0190331	-0.00834209	-0.0175271	-0.00423285	0.00900974	-0.0143725
H0351.2001	Head of Caudate Nucleus, Right	-0.0534467	-0.0743587	-0.0536051	0.0358384	0.00833701	0.0117116	0.0320643	0.0507569	-0.0326727	0.0190909	-0.0101725	0.0323934	-0.0141822	0.0169601	-0.00821449	-0.0154976	-0.0298115	0.0106595	-0.0248752
H0351.2001	Putamen, Left	-0.0637049	-0.0852967	-0.0693456	-0.00359023	0.0170833	0.0140936	0.0677571	0.0540916	-0.0176017	0.0256805	0.0102749	0.0288373	0.0365489	0.0185212	0.0596207	0.0240492	-0.0130933	0.0412912	-0.0314882
H0351.2001	Lateral group of Nuclei, Right, Ventral division	0.0587973	-0.0139555	-0.00407137	-0.0702728	0.0177003	0.0151029	0.0399583	0.0406502	-0.034283	-0.0140853	-0.0053655	0.00271655	-0.0292172	-0.00909687	-0.00427617	-0.000871512	0.00588906	-0.0148479	-0.0537092
H0351.2001	subiculum, Right	0.00630389	0.0119102	-0.00118718	0.00801397	-0.00258509	-0.0109496	-0.0141542	0.00141901	-0.0434519	-0.0128814	-0.0260802	0.00598301	-0.0277552	-0.00861171	0.000241143	0.0117269	0.00405147	-0.00577267	-0.0245009
H0351.2001	CA1 field, Right	-0.0305164	0.00349678	-0.0165942	0.0174028	-0.0104223	-0.0463651	-0.0207693	-0.0105049	-0.0180411	-0.0347837	-0.0343644	0.00821231	0.0372606	0.0157758	0.00864965	0.0211001	-0.0210916	-0.0195529	-0.0126681
H0351.2001	CA2 field, Right	-0.0141163	0.0309423	0.0198936	0.0634917	-0.0395838	-0.0304332	-0.0395814	-0.0436422	-0.0270844	-0.0149436	0.00604632	-0.0359989	-0.0270202	-0.00705832	0.0359193	-0.0148572	0.0204959	-0.00564026	-0.0315722
H0351.2001	CA3 field, Right	-0.0217271	0.00282139	-0.0477281	0.000414833	-0.0341709	-0.0637528	-0.00121653	0.00844664	0.00594393	0.00624089	-0.00737767	-0.025757	0.0531959	0.0282451	0.0440278	0.0411682	-0.048418	0.0037302	0.0182227
H0351.2001	Tail of Caudate Nucleus, Right	-0.0276116	-0.0489373	-0.0192452	0.038856	0.0311025	0.00253657	0.00382488	0.0367007	-0.0350803	-0.00351265	-0.0111057	0.0570272	-0.0297286	0.00313163	-0.0329602	-0.0235377	-0.0340982	-0.0220623	-0.0467381
H0351.2001	Fastigial Nucleus, Left	0.0251299	-0.0433792	-0.0148612	-0.0782614	0.0549656	0.0529101	0.0729108	0.0304144	0.0502598	-0.0138817	-0.0218512	0.0531482	0.0205491	0.000375994	-0.0123526	0.0352528	-0.00506092	-0.00247906	0.0838618
H0351.2001	Globose Nucleus, Left	0.0178101	-0.0544799	-0.0165965	-0.0819608	0.0605943	0.0525541	0.0770031	0.0489679	0.0269916	0.00168765	0.000837633	0.0436074	-0.00247044	-0.0133266	0.0152881	0.0285945	0.00544143	0.00586252	0.0326839
H0351.2001	Claustrum, Right	-0.00188462	0.00888977	0.0236123	0.00275689	0.00695753	0.0171428	-0.00553272	-0.00943162	-0.0453524	-0.0263781	-0.0152718	-0.00998647	-0.0259538	-0.0202386	-0.0367618	-0.012302	0.0178562	0.000713852	-0.0265623
H0351.2001	Claustrum, Right	-0.0156707	0.00130339	0.00997158	0.0105856	0.00201895	0.00922431	-0.0168535	-0.0111417	-0.00186465	-0.01252	-0.0284404	-0.0267599	0.0286982	-0.00574538	0.00871603	-0.00750558	0.00788785	0.00499753	0.00971506
H0351.2001	Claustrum, Left	-0.0303652	-0.00643801	-0.0109812	-0.00186495	0.0091254	-0.0134181	-0.00952222	-0.00472387	0.00515502	-0.0424638	-0.0443043	0.0240633	0.0562202	0.00971774	-0.0127756	0.00983082	0.00605207	0.0100134	0.00524136
H0351.2001	Claustrum, Right	0.000932316	0.0190734	0.0162674	0.00903012	0.000200792	0.00269653	-0.0160657	-0.00899437	-0.0347779	-0.00541415	-0.0139004	-0.00386199	0.0100782	0.00393385	-0.0173867	-0.0332882	-0.0219825	-0.0277139	-0.0463502
H0351.2001	subiculum, Right	0.0137982	0.00548952	0.0189873	0.00907352	0.00918417	0.0111212	-0.000527067	0.00989968	-0.0366669	-0.0019762	0.011957	-0.0209193	-0.0324389	-0.0295496	-0.0175326	-0.0359248	0.0113544	-0.0163178	-0.039784
H0351.2001	CA2 field, Right	-0.00673532	0.0154877	0.000582106	0.00835063	-0.010765	-0.0149718	-0.00376922	-0.0208785	0.0750229	-0.068214	-0.0350932	0.014072	-0.0028533	0.00186866	-0.0171199	0.0334414	-0.00217187	-0.0164033	0.147225
H0351.2001	CA3 field, Right	-0.0176126	0.0133794	-0.0278223	0.00765706	-0.0447526	-0.0482077	-0.0148752	-0.010884	-0.00407282	-0.0230537	-0.0266528	-0.0160622	0.0467029	0.024589	-0.00867841	0.0180596	-0.0286686	-0.00868099	0.00110555
H0351.2001	CA4 field, Right	-0.0243103	0.00439284	-0.044839	-0.00150323	-0.0386756	-0.0528638	-0.000231154	0.0156699	-0.00269997	-0.014722	-0.0294367	-0.0125851	0.0387273	0.0297836	0.00296046	0.0390821	-0.0536857	-0.0186213	0.00802124
H0351.2001	Dentate gyrus, Right	-0.0318912	0.0111387	-0.026698	0.0247987	-0.0454583	-0.0397587	-0.0384793	-0.0575998	-0.0134731	-0.00484334	-0.0371226	0.00953549	0.00582479	0.0171297	-0.00216125	0.015668	0.003484	0.0380516	0.00196823
H0351.2001	Tail of Caudate Nucleus, Right	-0.0297792	-0.0498891	-0.0311848	0.0301599	0.0116895	0.00437574	-0.00283063	0.0250379	-0.00917412	-0.0292638	-0.0450609	0.0466604	-0.0249276	-0.00120603	-0.0262585	0.00377313	-0.00272504	0.0245406	-0.0137149
H0351.2001	Dorsal Lateral Geniculate Nucleus, Right	0.0679095	-0.0091082	-0.0211235	-0.0687203	-0.0113977	-0.00717927	0.0296705	0.0560984	-0.0224474	0.0248281	0.0171372	-0.0355208	0.0226979	-0.00382185	0.0147728	0.02954	-0.035098	-0.0338099	-0.0336551
H0351.2001	Claustrum, Left	-0.00836265	0.0148237	-0.00638611	0.002613	-0.0141802	-0.02384	-0.00563296	-0.0134943	-0.0226142	-0.011537	-0.0264367	-0.00394698	0.0243801	0.0158632	0.0046675	0.0170329	-0.0241872	-0.0143907	-0.0166285
H0351.2001	Claustrum, Left	-0.00714914	0.00551589	0.00392506	-0.00412117	-0.00855114	0.000760038	-0.0156069	-0.0253477	-0.00293523	-0.043112	-0.0418892	0.00276986	0.0123204	-0.00541403	-0.0117476	0.00743775	0.0155585	0.0151794	-0.00126923
H0351.2001	subiculum, Right	0.00152984	0.00597965	0.00837951	0.00844231	0.011015	-0.00599059	-0.00555488	0.00745057	-0.0369855	-0.0196396	-0.00557542	0.00370665	-0.0138681	-0.00466907	-0.0307964	-0.0116931	-0.016298	-0.03584	-0.0292713
H0351.2001	CA1 field, Right	-0.0276085	0.000141384	0.0170039	0.0273042	0.00364908	-0.00843686	-0.030615	-0.032902	-0.0354826	-0.0231592	0.00490311	-0.0158824	-0.011382	-0.0106324	0.00214728	-0.0178132	0.0297302	0.00822748	-0.0270535
H0351.2001	CA2 field, Right	-0.0099038	0.00949486	0.0328206	0.0171112	-0.0159888	-0.00531659	-0.0284689	-0.043681	-0.0388601	-0.0394565	0.0135381	-0.041282	-0.0387613	-0.0295466	0.0236262	-0.0222561	0.0315972	-0.0173599	-0.0466917
H0351.2001	CA3 field, Right	-0.0148116	0.0180824	-0.00661415	0.0138742	-0.0472217	-0.0389395	-0.0284621	-0.0339087	-0.0245268	-0.0253049	-0.025507	-0.0217308	-0.00312135	0.00610379	0.0366444	0.00704072	0.00643205	0.00724506	-0.0272319
H0351.2001	CA4 field, Right	-0.0191834	0.00635932	-0.0335048	0.00701941	-0.0407131	-0.0611465	-0.0110512	0.00203142	0.00265995	-0.00728327	-0.0178732	-0.027279	0.0504163	0.0194189	0.0442921	0.03949	-0.0348581	-0.0198487	-0.00184811
H0351.2001	Dentate gyrus, Right	-0.0299976	0.0177515	-0.0420672	0.0270081	-0.0713547	-0.0355204	-0.0390417	-0.0554783	-0.022847	0.0477926	-0.0119655	0.0221284	0.00664316	0.0391232	-0.0125931	-0.0133464	-0.0260309	0.0406329	0.00571744
H0351.2001	Lateral group of Nuclei, Right, Dorsal Division	0.0343735	-0.0167661	-0.00291737	-0.0518986	0.0163891	0.022982	0.0248253	0.0453414	-0.036297	0.00095479	-0.000680855	-0.00470621	-0.0334644	-0.0172955	-0.0322457	-0.0210612	0.00833234	-0.00685377	-0.0320564
H0351.2001	CA1 field, Right	-0.0281763	-0.00241449	0.0136665	0.0257053	0.00703553	-0.017947	-0.0328117	-0.0364053	-0.00489536	-0.0343015	-0.0135451	-0.0123508	-0.00479277	-0.0158506	0.0173602	-0.000102422	0.0312473	0.0154952	-0.0113179
H0351.2001	central glial substance	-0.056894	-0.0568942	-0.0285688	-0.0335961	0.00490537	0.0152938	-0.00910951	0.0153996	-0.0525392	0.0182458	0.0190891	0.0252652	-0.0255585	0.000611351	-0.0235947	-0.0398892	-0.0112483	0.0209051	-0.0222104
H0351.2001	gracile nucleus, Right	5.09031e-05	-0.000679875	-0.0119288	-0.0194989	0.0178526	0.0203332	0.0259458	-0.00694602	0.0364057	-0.0352932	-0.0456154	0.0360507	0.0263793	0.0157956	-0.0146846	0.0142498	0.0247629	0.036547	0.0603603
H0351.2001	central medullary reticular group, Left	-0.0139762	-0.00725949	0.00165108	-0.0143953	0.0485437	0.0068657	0.0261545	-0.0223224	-0.00655523	-0.0280152	0.000165953	0.048206	0.062858	0.0126316	-0.00893662	0.00240509	-0.00702997	-0.030396	-0.00659081
H0351.2001	central medullary reticular group, Right	-0.0147303	-0.00628676	-0.005669	-0.0160161	0.024622	0.0224675	0.0286917	-0.0351244	0.0391873	-0.0367672	-0.0351414	0.0490011	0.00828148	0.00907102	0.01103	0.011051	0.0268561	0.0299309	0.0714063
H0351.2001	spinal trigeminal nucleus, Left	-0.00449067	0.0110332	-0.0159602	0.0177511	-0.0274564	-0.0223306	-0.0343767	-0.0310114	-0.0432506	-0.0285555	-0.0420542	0.00341905	0.0453103	0.00294872	0.0257787	0.00967386	0.0264283	0.0559346	-0.0360471
H0351.2001	spinal trigeminal nucleus, Right	-0.00398257	0.0161079	-0.0102001	0.0230242	-0.0193238	-0.0287428	-0.0323743	-0.0288923	-0.0308901	-0.0141164	-0.0174939	0.00714509	0.0572303	0.0115102	-0.00782601	-0.0130374	-0.0155063	0.00610913	-0.0198
H0351.2001	central glial substance	-0.0683437	-0.0617914	-0.0490443	-0.0326055	-0.0294073	-0.0192869	-0.0285833	0.00241889	-0.0352953	0.0411426	0.0187008	0.0172752	-0.0125396	0.00742381	0.0111351	-0.0041959	-0.0152791	0.0439294	0.0131898
H0351.2001	cuneate nucleus, Left	-0.00396542	-0.00503692	-0.0304637	-0.0183086	-0.0174307	-0.017505	0.0179009	0.000684567	0.0326604	-0.0150323	-0.0406466	-0.00528436	0.0487526	0.00612204	0.0262546	0.0516784	0.00442937	0.0185792	0.0508476
H0351.2001	cuneate nucleus, Right	-0.00249951	-0.00664787	-0.0162071	-0.0176074	0.000155554	0.00521549	0.0262918	0.0121524	0.0117873	0.0117815	-0.00245222	-0.0100914	0.018169	0.00375257	0.00938279	0.0216833	-0.0258759	-0.0290048	0.0213528
H0351.2001	lateral medullary reticular group, Left	0.0292645	0.0111967	0.0174759	-0.0132145	0.0317887	0.0240538	0.0163559	-0.0137632	-0.00204937	-0.0133965	-0.0179951	0.0197854	-0.0198053	0.000320374	-0.0180747	-0.0258421	-0.00437574	-0.0346955	0.0100242
H0351.2001	lateral medullary reticular group, Right	0.0330461	-0.000837136	0.0324489	-0.00983514	0.0373208	0.0381133	0.0145337	-0.0141234	-0.0178894	-0.0100856	0.0120473	0.00276297	-0.0363155	-0.0325571	-0.0195618	-0.0396345	0.0150776	-0.0197336	-0.0289191
H0351.2001	spinal trigeminal nucleus, Left	0.00523164	0.0121894	0.0066639	0.0248232	-0.0167097	0.0178078	-0.00549828	-0.00121736	-0.0426575	0.0320747	0.0209794	-0.0398308	-0.0222692	-0.0146296	-0.0753725	-0.0620495	-0.056872	-0.0344924	-0.0414095
H0351.2001	spinal trigeminal nucleus, Right	0.00468952	0.00155276	0.00688623	0.0210984	-0.0258687	0.0118165	-0.0122897	-0.00826981	-0.0478095	0.0282823	0.0157757	-0.0454585	-0.0382751	-0.0359199	-0.0360114	-0.024592	0.0121681	0.00894719	-0.0401134
H0351.2001	arcuate nucleus of medulla, Right	0.0670745	0.0110792	0.0861058	-0.00228349	0.047642	0.0317828	-0.0364861	-0.0531614	-0.00957844	-0.0306293	0.0402503	-0.03965	-0.0749392	-0.0847766	-0.0106218	-0.0679809	0.0316159	-0.043314	-0.048845
H0351.2001	cuneate nucleus, Left	0.00916619	-0.00658532	-0.00388375	-0.029899	0.0105571	0.0279469	0.0297542	0.0115242	-0.00187897	-0.00291527	-0.00208428	0.00198185	-0.00583215	-0.00606276	-0.0151313	-0.00148869	-0.0198254	-0.0250092	0.00771257
H0351.2001	cuneate nucleus, Right	0.0369522	-0.00500941	0.0453375	-0.0166888	0.040369	0.036199	0.0136799	-0.0113562	-0.0174374	-0.0110897	0.037213	-0.0205428	-0.0350225	-0.0531282	-0.00385325	-0.0309044	0.0237286	-0.0233415	-0.0417492
H0351.2001	dorsal motor nucleus of the vagus, Left	-0.0129144	0.00172357	0.00288577	0.00535393	-0.0301623	-0.0180835	-0.0318724	0.00638915	-0.0527272	-0.0239357	-0.0197388	-0.0250453	0.000114792	-0.0119907	0.00635321	-0.00201855	0.0213576	0.0098131	-0.0415116
H0351.2001	dorsal motor nucleus of the vagus, Right	-0.0037607	0.0080221	0.0113345	0.0133063	-0.0289534	-0.0035431	-0.0331896	0.0111017	-0.0595173	-0.0060037	-0.0201976	-0.0322173	-0.0194581	-0.00612811	-0.0245725	-0.037265	0.00271986	0.00545976	-0.0396934
H0351.2001	inferior olivary complex, Left	-0.0183528	-0.0138455	-0.00573949	-0.00850001	-0.000331948	-0.0147242	-0.0014939	0.0283167	-0.0202745	-0.00124671	0.0201552	-0.00739899	0.00632517	-0.01581	0.017234	0.0116264	-0.0113818	-0.0127708	-0.0278051
H0351.2001	inferior olivary complex, Right	-0.0203078	-0.0185233	-0.0121319	-0.0130419	-0.00589479	-0.014153	-0.00289087	0.0260085	-0.0325538	-0.0053428	0.00720911	-0.00783698	0.0076494	-0.0179233	0.045426	0.0181273	0.0174783	0.018278	-0.0415584
H0351.2001	central medullary reticular group, Left	0.00285868	0.00557006	-0.003268	-0.00908925	-0.00819591	0.0096737	0.0120067	-0.00619068	-0.0293529	-0.0121294	-0.0122188	0.00220812	-0.0168512	0.00280094	-0.00362139	-0.0215006	-0.00594045	-0.00277495	-0.03122
H0351.2001	central medullary reticular group, Right	0.00699913	0.00137687	0.0076425	-0.0062924	0.00287082	0.0294215	0.0142523	-0.00528259	-0.0361842	-0.000397778	-0.0105153	-0.0121987	-0.0396812	-0.010414	-0.0193504	-0.0197517	0.0116488	0.00273152	-0.0384811
H0351.2001	lateral medullary reticular group, Right	0.00817475	0.00034592	0.00108092	-0.0173971	0.00994766	0.0134158	0.0165864	-0.00365113	-0.0183046	-0.0209178	-0.00674478	0.00536577	0.00531377	0.000757296	-0.00641043	-0.0110227	-0.0133191	-0.0216865	-0.020752
H0351.2001	spinal trigeminal nucleus, Left	-0.00252806	0.00381973	-0.0155564	-0.00597815	-0.0121609	-0.00692086	0.00179057	0.00360342	-0.0128971	-0.00904443	-0.0104355	0.0112877	-0.00570666	0.00409546	-0.00225214	0.00250171	-0.0117843	-0.0019133	-0.0128548
H0351.2001	spinal trigeminal nucleus, Right	0.00228292	0.00685887	-0.00879185	-0.00354068	-0.00569686	0.00744329	0.00916108	0.00488088	-0.0436682	0.00363375	0.000884191	0.00113249	0.000370912	0.00828781	-0.0163761	-0.0243112	-0.0181206	-0.00780274	-0.0467289
H0351.2001	gracile nucleus, Right	-0.011274	-0.0151055	-0.013248	-0.022363	0.00911274	0.0148164	0.0255877	0.0231568	0.0168855	-0.00382585	-0.00908623	0.0172377	-0.0036574	-0.00469234	-0.000975261	0.0101839	-0.0216701	-0.0268316	0.0149788
H0351.2001	central glial substance	-0.0480119	-0.0447659	-0.0235199	-0.0168289	0.00882274	0.021955	-0.019837	0.0334094	0.00690494	0.0138727	-0.0142488	0.0447947	-0.026704	0.00720105	-0.0519992	-0.0366826	-0.032973	-0.0124199	0.0425255
H0351.2001	arcuate nucleus of medulla, Left	0.0599675	0.0315413	0.0464315	-0.00247529	0.0266302	-0.0262867	-0.0423293	-0.0520138	-0.0341713	-0.0397885	0.00534914	-0.00954291	-0.0278311	-0.0130278	0.00789654	-0.0107322	0.0479518	-0.0100904	-0.0471415
H0351.2001	central glial substance	-0.0581415	-0.0493333	-0.0503704	-0.0215781	-0.0373687	-0.026332	-0.0219998	0.0167081	-0.00793713	0.055992	0.0204207	-0.00563757	-0.0181133	0.0177496	-0.0031865	-0.0139794	-0.0511832	0.00246139	0.0333127
H0351.2001	cuneate nucleus, Right	0.0233511	-0.00196684	0.0058376	-0.023026	0.00681572	0.0357409	0.0333634	0.00696826	-0.0159582	0.00674322	-0.00121792	-0.0185845	-0.017303	-0.0154104	-0.0355976	-0.019704	-0.0321274	-0.0314523	-0.0189214
H0351.2001	dorsal motor nucleus of the vagus, Left	-0.0155998	0.00612236	-0.0241792	0.00257761	-0.0336361	-0.0195769	-0.0112283	0.0228678	-0.0274322	0.014974	-0.0225078	-0.00410377	-0.0062409	0.0215529	-0.0118063	-0.0115748	-0.0240947	0.00123501	-0.00540746
H0351.2001	dorsal motor nucleus of the vagus, Right	-0.0105143	0.0124617	-0.0220879	0.00659473	-0.0381756	-0.0232288	-0.0124323	0.0190976	-0.020581	0.0112648	-0.0419859	-0.0081302	-0.0112475	0.027364	-0.00719514	-0.0139199	-0.0289361	-0.00846204	-0.0138509
H0351.2001	gracile nucleus, Left	-0.0213718	-0.0271313	-0.0129568	-0.0282338	0.0340864	0.0242382	0.0349219	0.0412052	0.0128271	-0.00150771	0.00598908	0.0239571	0.0100862	0.00264886	-0.0272107	0.0118113	-0.017677	-0.0307674	0.0189947
H0351.2001	gracile nucleus, Right	-0.029338	-0.0424212	-0.0147382	-0.0335936	0.0332479	0.0205531	0.031651	0.0424296	0.00674726	0.000955225	0.0234317	0.00346663	0.0052227	-0.0215187	0.00537967	0.0331392	0.00300672	-0.00704426	-0.00440935
H0351.2001	hypoglossal nucleus, Left	-0.00119507	0.00343551	-0.0187364	-0.0154894	-0.0143803	-0.0041076	0.0141468	0.015999	-0.0135282	-0.000718258	-0.024586	-0.00467051	-0.00249691	0.014323	-0.0193484	-0.00319696	-0.029455	-0.0145132	0.011997
H0351.2001	hypoglossal nucleus, Right	0.00932972	0.00413815	-0.0135591	-0.01343	-0.0138531	-0.000452456	0.0129916	0.0101793	-0.0225651	-0.00265904	-0.0292578	-0.00700782	-0.0103435	0.0113503	-0.00696741	-0.00399371	-0.00833937	0.0044722	-0.0283943
H0351.2001	inferior olivary complex, Left	-0.000466483	-0.00200175	0.0189191	0.00112831	0.0106848	0.0193027	0.00157751	0.0172553	-0.0445293	0.00464572	0.0137004	-0.017064	-0.0368438	-0.0271293	-0.01574	-0.0326395	-0.00683095	-0.0293937	-0.0606226
H0351.2001	inferior olivary complex, Right	-0.0100581	-6.51607e-05	-0.0110945	-0.00471817	-0.0174943	-0.00369232	0.000386029	0.0194089	-0.00912488	-0.00284747	-0.0444077	0.00362767	-0.00808755	0.00314154	-0.027091	-0.00099136	-0.0173268	-0.0184671	0.00370426
H0351.2001	central medullary reticular group, Left	-0.0108389	0.00174143	-0.0421691	-0.00572273	-0.0423354	-0.0858075	-0.00728963	-0.0169868	0.0396276	-0.0136288	-0.0171002	-0.0156425	0.0449007	0.0280379	0.0768212	0.06784	-0.0115417	0.00621672	0.0625961
H0351.2001	central medullary reticular group, Right	-0.0100348	0.00133038	-0.0406694	-0.00346593	-0.0455333	-0.0817196	-0.00696726	-0.0193267	0.0354909	-0.00482894	-0.00284974	-0.0174286	0.050733	0.0247105	0.0697312	0.0707	-0.0161615	0.00938775	0.0590877
H0351.2001	lateral medullary reticular group, Left	0.00501516	-0.00253368	-0.021607	-0.0180003	-0.0155141	-0.0546643	0.00167066	-0.017199	0.00914162	-0.0178257	-0.00618463	0.00291515	0.0202158	0.0123016	0.0522948	0.0504352	-0.00168507	0.00267021	0.00562165
H0351.2001	lateral medullary reticular group, Right	0.00298669	-0.00289406	-0.0229432	-0.0184836	-0.0153507	-0.0436298	0.00565861	-0.0146451	0.0225333	-0.0227859	-0.0187792	-0.00177228	0.00935353	0.0132057	0.0280553	0.0419842	-0.00672585	-0.00478819	0.0434759
H0351.2001	spinal trigeminal nucleus, Left	-0.0115748	0.00298705	-0.0368892	0.00407684	-0.0381294	-0.0775084	-0.0131082	-0.0172941	0.00935252	-0.00175952	-0.00242025	-0.00330079	0.0425299	0.0159142	0.0444871	0.0579305	-0.024486	0.00163174	0.0100746
H0351.2001	spinal trigeminal nucleus, Right	-0.0138494	0.00196231	-0.0305983	0.00386735	-0.0367179	-0.0663636	-0.0164032	-0.0200307	-0.00643623	-0.00211868	0.00921077	-0.0172705	0.0374062	0.00706055	0.0449897	0.0469821	-0.0315487	-0.00290404	-0.00631823
H0351.2001	locus ceruleus, Right	-0.0206202	-0.014112	0.0362846	0.00367046	0.00148215	-0.00103907	-0.023777	-0.00242404	-0.0417058	-0.0219105	0.0284463	-0.0247824	-0.0615987	-0.0370329	0.0554804	-0.039655	0.0244786	-0.0256262	-0.0351643
H0351.2001	pontine nuclei, Right	0.0311933	-0.00184739	0.0261927	-0.02196	0.0299951	0.0200405	0.0238434	-0.0497809	-0.00681929	0.013132	0.0480431	-0.00301972	-0.00135704	-0.0275549	0.0182016	-0.00680692	0.0143957	-0.0111103	-0.0405771
H0351.2001	nucleus subceruleus, Left	-0.0186863	-0.0119684	-0.0184977	-0.0156982	0.0099696	-0.0217411	0.0209858	0.00243934	0.012677	-0.0137266	0.00724896	0.0181573	-0.00434195	-0.0012519	0.0271983	0.00327065	-0.0197655	0.00611326	0.0194517
H0351.2001	locus ceruleus, Right	-0.0153068	-0.0046391	0.0312364	0.00717222	-0.0145166	-0.00509266	-0.0325386	-0.0147992	-0.0538418	-0.0283016	0.0101007	-0.0243619	-0.0335587	-0.0256538	0.0182913	-0.0519029	0.027167	-0.0282769	-0.0564219
H0351.2001	Pontine Reticular Formation, Left	-0.0088973	0.000379706	-0.0265511	-0.0149185	-0.0110733	-0.000412644	0.00817308	0.0042735	-0.0102755	-0.0204071	-0.0437072	0.00651686	0.0402375	0.0164808	-0.0506475	-0.0179623	-0.0128212	0.00697981	-0.00441447
H0351.2001	ventral tegmental area, Left	-0.0294833	0.00115241	-0.0326209	-0.00902423	-0.0152065	-0.0452706	0.00263971	0.000963328	-0.0342323	-0.0163201	-0.013649	0.019681	0.0279224	0.0375396	0.0102619	-0.0067756	-0.0243056	-0.0116251	-0.0257709
H0351.2001	arcuate nucleus of medulla, Right	0.0550054	0.00924939	0.0632914	-0.00315632	0.0561244	0.0248853	-0.0217792	-0.0246366	0.0138472	0.00839916	0.0463196	0.000471027	-0.059429	-0.0525262	0.0292674	-0.0426698	0.0115236	-0.053573	-0.0152504
H0351.2001	pontine nuclei, Right	0.0457321	0.0236045	0.00918226	-0.0125823	-0.0122555	-0.0168747	-0.0149944	-0.043266	-0.0405602	0.00132997	-0.00549085	-0.0153588	0.0731091	0.00571761	0.011316	0.00310492	0.025296	0.0129608	-0.0526149
H0351.2001	pontine nuclei, Left	0.0594678	0.0357467	0.00730466	-0.00369945	-0.0308012	0.0114473	-0.011056	-0.0337998	-0.0203918	0.0225194	-0.0410482	-0.0398594	-0.0254638	-0.00109447	-0.0163486	0.0107257	0.0176261	0.0173472	-0.00827304
H0351.2001	pontine nuclei, Left	0.0301294	-0.00434919	0.0261456	-0.0207443	0.0257148	0.0171823	0.0206375	-0.0596425	-0.00335042	0.00466155	0.0462477	-0.0134737	-0.0174968	-0.0356111	0.0237715	0.0148456	0.0312837	0.00615189	-0.0180693
H0351.2001	lateral parabrachial nucleus, Left	-0.0498592	-0.0127542	-0.0435317	-0.0091654	-0.00436173	-0.0425879	-0.00414805	-0.00493458	0.0331702	-0.05787	-0.0526301	0.0603715	0.0166366	0.0287018	-0.0151966	0.0158383	-0.0136516	0.0362879	0.0643383
H0351.2001	lateral parabrachial nucleus, Right	-0.0370865	-0.0315164	0.00535569	0.00717885	0.0473376	0.0159172	0.00350112	0.000156994	0.0424662	-0.00242188	-0.000342449	0.0175191	0.00492418	-0.0297587	-0.0127812	0.0218104	0.0174796	0.00896632	0.0630909
H0351.2001	Pontine Reticular Formation, Left	-0.00111171	-0.00149332	-0.0348524	-0.0151636	-0.0248647	-0.0251305	0.00460197	-0.00046493	-0.00928297	0.00298687	-0.0255641	-0.00279932	-0.00890385	0.00840529	0.038795	0.025933	-0.012766	0.0314169	-0.00174984
H0351.2001	locus ceruleus, Left	-0.0199671	-0.002128	-0.0273606	-0.00283967	-0.0242915	-0.0191419	-0.0131238	0.0103801	-0.0144281	-0.0129336	-0.0274137	-0.0050334	0.00336451	0.0143779	-0.0265638	-0.00538712	-0.0124274	0.00671036	0.00275402
H0351.2001	pontine nuclei, Left	0.0352782	0.0132602	0.00878797	-0.0195948	-0.00012917	-0.0146831	0.0139038	-0.0541671	-0.00614986	0.00433106	0.0212713	0.00738747	-0.0174417	-0.00784262	0.0437393	0.00170684	0.0159979	0.0160848	0.0184103
H0351.2001	locus ceruleus, Right	-0.012045	-0.00842205	-0.00088522	-0.000890009	-0.00602166	0.0117128	-0.00660535	0.00603933	-0.0422951	-0.0121589	-0.0127716	-0.00746227	-0.0207259	-0.00810859	-0.042563	-0.0362957	0.0122435	0.0114285	-0.0324679
H0351.2001	principal sensory nucleus of trigeminal nerve, Right	0.0045027	-0.0100216	-0.0417654	-0.0246591	-0.00376907	-0.0217301	0.0131164	0.0331399	0.0068538	0.0186864	-0.0168935	0.0113692	0.0723978	0.0155561	0.0255985	0.024077	-0.0245685	0.006387	0.0173598
H0351.2001	locus ceruleus, Left	-0.0137745	-0.0133528	0.036415	0.00806887	-0.00759678	0.0212293	-0.030791	-0.0101393	-0.0425329	-0.0252382	0.00629717	-0.0318931	-0.045991	-0.0457086	-0.00695856	-0.0381631	0.0363658	-0.0188587	-0.0572306
H0351.2001	locus ceruleus, Left	-0.018205	0.0107952	-0.0256828	-0.00662418	-0.0394768	-0.0340457	-0.0204711	-0.00571983	-0.0286033	-0.040987	-0.0525764	0.0247372	0.0118886	0.028194	-0.0292918	-0.0132375	-0.00451656	0.0118231	-0.0199795
H0351.2001	Pontine Reticular Formation, Right	0.00815226	-0.0113458	-0.00643554	-0.0150371	0.00275928	0.00854059	0.0108811	0.0074945	-0.0412717	0.00700833	0.0139388	-0.0162673	-0.0331939	-0.0176722	-0.0193818	-0.00992646	0.0108553	0.0142895	-0.0350345
H0351.2001	Pontine Reticular Formation, Left	0.0217282	-0.00697738	-0.00857038	-0.0116521	-0.00305264	0.00319432	0.0140987	0.00664818	-0.00410916	0.0198233	0.00900942	-0.0387675	-0.00269088	-0.0198802	0.0208697	0.017629	0.0123653	0.0147625	-0.00624372
H0351.2001	principal sensory nucleus of trigeminal nerve, Right	-0.00151466	-0.0161632	-0.042301	-0.0305788	-0.0108387	-0.0059943	0.0243065	0.0456433	-0.0232758	0.030578	0.00406164	0.00352091	0.0302269	0.00898018	0.00162052	0.0125402	-0.0138022	0.0287143	-0.0174134
H0351.2001	nucleus subceruleus, Right	-0.0100703	-0.00876014	-0.00920835	-0.012687	-0.0013812	0.0107254	0.0126487	-0.0017159	-0.0246161	-0.00792541	-0.00667688	-0.011804	-0.00168202	-0.00710857	-0.0249823	-0.0190685	0.0168119	0.0225281	-0.0210713
H0351.2001	central gray substance of midbrain, Left	-0.0279086	-0.0203488	-0.0401343	0.00585182	-0.0440078	-0.0428727	-0.0130896	0.0369672	0.00849599	0.0576786	0.027408	-0.048729	0.0342795	-0.0123595	0.0274072	0.027122	-0.0304375	0.0300668	0.0309194
H0351.2001	subcuneiform nucleus, Right	-0.0246831	-0.0130058	-0.0326153	-0.0119383	-0.0158964	-0.00536954	0.00923692	0.010885	-0.00304239	-0.0049941	-0.0132848	0.00235784	-0.00301957	0.00779964	-0.0261103	0.00628159	-0.00496047	0.038205	0.0177797
H0351.2001	locus ceruleus, Right	-0.0150649	0.010238	-0.00746821	-0.000148999	-0.0264836	-0.0110002	-0.0161901	-0.00069043	-0.0511408	-0.0309217	-0.0355668	0.00685278	-0.00448564	0.0182052	-0.0573786	-0.0305175	-0.00995149	-0.00389535	-0.0305348
H0351.2001	central gray substance of midbrain, Left	-0.0186825	0.0101813	-0.0409972	0.00104617	-0.0405107	-0.0652446	-0.0286478	0.00553078	0.0360537	-0.0329293	-0.0445363	0.0246379	0.0424146	0.0439511	0.00214598	0.0360434	-0.0352537	-0.00205452	0.0718028
H0351.2001	Red Nucleus, Right	-0.0547001	-0.0583336	-0.00940895	-0.0517534	0.0777082	0.0996757	0.0900401	-0.00929041	0.0177801	0.0292413	0.0238845	0.0429548	-0.0147014	-0.00129748	-0.0267985	-0.00187954	-0.00348048	0.0216264	0.0472473
H0351.2001	Substantia Nigra, pars reticulata, Right	0.0139958	0.00505144	-0.0262232	-0.0169492	-0.00623245	0.00938927	0.0308683	-0.00178776	0.00845248	0.0215241	-0.0193319	-0.00113948	0.013526	0.0203968	-0.00638113	0.0153545	-0.0319368	-2.434e-05	0.0314243
H0351.2001	central gray substance of midbrain, Right	-0.0183704	-0.00210367	-0.0240025	0.00619141	-0.0304577	-0.0293531	-0.0235922	0.0252649	-0.0193392	0.0148876	-0.00591901	-0.0211483	0.0148405	0.0095691	-0.0208761	-0.0110141	-0.0258014	0.00178756	-0.00194422
H0351.2001	lateral parabrachial nucleus, Right	-0.0410458	-0.0200774	-0.0154962	0.00121041	0.0323172	-0.002837	0.0012706	0.00545206	0.0334374	-0.0305316	-0.0193	0.065242	-0.00507291	-0.00388593	-0.000445177	0.00541168	-0.01602	0.00535686	0.0585708
H0351.2001	Pontine Reticular Formation, Right	0.0248219	0.000990825	-0.00580661	-0.0123802	-0.00436714	0.00767294	0.0197774	0.0098478	-0.0297273	0.0397705	0.0200906	-0.0243212	-0.0169461	-0.0103297	0.0267994	0.00635322	-0.0070501	-0.00701791	-0.0334808
H0351.2001	Substantia Nigra, pars compacta, Left	-0.00468852	0.023488	-0.0172215	-0.00137646	-0.0364649	-0.0290016	-0.0273598	-0.00238983	-0.00852166	-0.0550597	-0.0794607	0.0291963	-0.000207113	0.0398666	-0.020784	0.0112346	-0.00589454	0.0130119	0.00629624
H0351.2001	nucleus subceruleus, Right	-0.0145978	-0.0169969	-0.0139283	-0.0191441	0.0169832	0.0182333	0.0273395	0.0106629	-0.0152471	-0.000760122	-0.00323597	0.0166781	-0.0269792	-0.00224749	-0.0249033	-0.00978243	-0.0178962	-0.006008	-0.0247295
H0351.2001	nucleus subceruleus, Left	-0.00617745	-0.0100559	-0.000742222	-0.00702134	0.0162951	0.00989077	0.0173034	0.00360621	-0.0175286	0.00677151	0.0158739	-0.00355095	-0.0393586	-0.0178067	-0.024914	-0.0137555	-0.00862962	-0.0112707	-0.0115339
H0351.2001	Substantia Nigra, pars compacta, Right	-0.019912	0.00280897	-0.0333493	-0.0110367	-0.0163307	-0.016322	0.0104255	0.0166156	0.0075528	-0.0161729	-0.0451273	0.0213143	0.0220861	0.0339725	-0.000868475	0.0201646	-0.0245008	-0.0175618	0.0379453
H0351.2001	Pontine Reticular Formation, Right	-0.006604	-0.00269037	-0.0215478	-0.00723868	-0.00408472	0.00537614	0.0085721	0.0165997	-0.0077393	-0.00421497	-0.0409761	0.00380402	0.0116191	0.0205329	-0.0411966	-0.00922402	-0.0274015	-0.015516	0.0117271
H0351.2001	ventral tegmental area, Right	-0.0293307	-0.00778969	-0.0285903	-0.0100341	-0.0122068	-0.0289843	5.50864e-05	0.00970658	-0.0123348	-0.0145538	-0.0272488	0.00935114	0.0445895	0.0215991	-0.0080147	0.00584422	-0.0251707	-0.00916254	-0.00603102
H0351.2001	Superior Olivary Complex, Left	0.0146324	-0.0112819	-0.0172099	-0.0271963	0.00506785	0.00680469	0.0181924	0.00128472	0.00988818	-0.0130356	-0.0249894	0.0126669	-0.00330006	-0.00583563	-0.00202062	0.012319	-0.0121483	-0.00415923	0.0215025
H0351.2001	trochlear nucleus, Right	0.0456547	0.020185	0.00127005	-0.0315021	-0.0298463	-0.00731369	-0.00546575	-0.00394088	-0.0289808	-0.0268813	-0.0342851	-0.00836203	0.0115918	0.0145933	-0.00689022	0.0110975	-0.00675236	-0.0330761	-0.0361571
H0351.2001	locus ceruleus, Left	-0.0185305	-0.018643	0.051964	0.00855647	0.00895739	0.0220964	-0.0204766	0.00358369	-0.0286312	-0.0118473	0.0442989	-0.0385122	-0.0605894	-0.0539493	0.0323425	-0.0431493	0.0225698	-0.055269	-0.0405349
H0351.2001	Superior Olivary Complex, Right	0.0204792	-0.0112372	-0.00598188	-0.023877	0.00921956	0.015802	0.02001	-0.00282134	0.000478733	-0.00190463	0.00478652	-0.0131201	0.00784051	-0.0210845	0.00509586	0.0197131	-0.00546176	0.00180216	0.0047903
H0351.2001	Midbrain Raphe Nuclei	-0.0281397	-0.00271958	-0.0164415	0.0045771	-0.0320821	-0.0149373	-0.0295568	-0.000176526	-0.0368067	-0.039001	-0.0456013	0.0100994	0.000525336	0.00881567	-0.0372116	-0.0104971	-0.008833	0.00859102	-0.0315989
H0351.2001	pontine nuclei, Right	0.0394226	0.00749901	0.020523	-0.0167364	0.00501577	0.0301361	0.0174215	-0.043524	-0.0212234	0.0196905	0.0176786	-0.0159707	-0.0340042	-0.0215484	0.0111116	0.00296504	-0.00409851	-0.0139673	-0.0203638
H0351.2001	Substantia Nigra, pars compacta, Right	-0.0084003	0.00873337	7.60379e-06	-0.0022886	-0.00316008	-0.0304665	-0.0277075	0.0106096	-0.0270382	-0.0446884	-0.0272898	0.0119412	-0.020639	0.00534857	0.0164329	0.0237251	0.00880455	-0.0085901	-0.0345123
H0351.2001	Midbrain Raphe Nuclei	-0.0289726	-0.0118661	-0.0112108	0.00423322	-0.0439596	-0.0146798	-0.0283132	0.0128305	-0.0358092	-0.015984	-0.015422	-0.0345817	0.0117658	-0.00754455	0.00197012	-0.00293088	-0.00541494	0.00268888	-0.0388908
H0351.2001	Midbrain Raphe Nuclei	-0.0293081	-0.0271169	0.0115403	0.00599476	0.00104467	0.00905979	-0.0279588	0.013621	-0.0536538	-0.0114833	-0.00255398	0.000397838	0.00344308	-0.025654	-0.00871002	-0.0207179	0.00182939	-0.01165	-0.0480141
H0351.2001	subcuneiform nucleus, Left	-0.0159318	-0.0210933	-0.0291126	-0.00470277	-0.0164702	-0.0105324	0.00984303	0.0261748	-0.00709245	0.0421172	0.0261615	-0.0345243	0.0276407	-0.0153511	0.0151663	0.0150109	-0.0292947	0.00857041	0.0128382
H0351.2001	trochlear nucleus, Left	0.0455553	0.00994062	0.0100482	-0.027035	-0.0260044	0.00290519	0.000516055	0.00310075	-0.0255013	0.00753858	0.00711561	-0.0438711	0.00399773	-0.00616327	-0.0333859	-0.00713936	-0.088733	-0.112208	-0.0383341
H0351.2001	arcuate nucleus of medulla, Left	0.0379862	0.0109051	0.0495223	-0.00214843	0.0233638	-0.00219684	-0.0384333	-0.0392026	0.0120911	-0.0314352	0.0206581	-0.0231497	-0.0460726	-0.0468094	-0.00194289	-0.0345106	0.0263611	-0.0226342	-0.00173498
H0351.2001	arcuate nucleus of medulla, Right	0.0349534	0.00818778	0.053235	-0.00281854	0.0390268	-0.00038873	-0.0398578	-0.0384641	0.00561502	-0.0463415	0.0210436	0.00280454	-0.0471735	-0.0470074	0.0156759	-0.030171	0.0269818	-0.0209583	-0.0078087
H0351.2001	gigantocellular group, Left	-0.0233535	-0.0188084	-0.0172873	-0.0175339	-0.00909795	-0.00123295	0.0197337	-0.011584	-0.0224451	-0.0246236	-0.0147057	-0.00487519	-0.0129184	-0.0121617	0.0176393	0.0203374	0.0146577	0.0285496	-0.0346203
H0351.2001	lateral medullary reticular group, Right	-0.00621439	-0.0143317	-0.0110416	-0.0223439	0.00889182	-0.0010334	0.0192585	-0.00170932	-0.0260684	-0.028851	-0.0012436	0.0151548	-0.0268959	-0.0108149	0.00908401	0.00210612	-0.00133091	0.0095134	-0.0273695
H0351.2001	raphe nuclei of medulla	-0.0462213	-0.0255654	-0.0145688	-0.00939587	9.60722e-05	-0.0137671	0.0249227	-0.0351752	0.0040135	-0.0277318	-0.0167566	0.0269361	-0.00403603	-0.00234036	0.0131959	-0.00572543	6.68145e-05	0.0205012	0.0134529
H0351.2001	spinal trigeminal nucleus, Left	-0.0144546	-0.00360936	-0.0292388	-0.00643314	0.00187481	0.028833	0.0301317	0.0272897	-0.0149518	0.0284357	-0.00494598	0.0107303	-0.0154462	0.0209753	-0.0486796	-0.0265682	-0.052481	-0.032804	0.0117606
H0351.2001	vestibular nuclei, Left	-0.0365269	-0.0214786	-0.035429	-0.0190295	0.00836546	0.0297064	0.0369087	0.0685157	0.00416117	0.031725	0.00776891	-0.00190804	-0.00827455	0.0154345	-0.0596048	-0.0359428	-0.066395	-0.0350755	0.0254532
H0351.2001	vestibular nuclei, Right	-0.0428203	-0.0301914	-0.0479734	-0.0244947	-0.00629133	-0.00798034	0.0116207	0.0433678	-0.00718949	-0.0133909	-0.0150769	0.0240006	0.00817581	0.00768173	-0.00280865	0.0317149	-0.018948	0.0218264	0.01664
H0351.2001	dorsal motor nucleus of the vagus, Left	-0.0360907	-0.0132135	0.0221943	0.0124171	-0.0060671	-0.00407669	-0.0392149	0.0135711	-0.0274836	-0.0464297	-0.00722434	-0.0158226	-0.0405966	-0.0184286	-0.0299091	-0.0486174	0.0144997	-0.0204403	-0.0190957
H0351.2001	dorsal motor nucleus of the vagus, Right	-0.0371475	-0.013545	0.022062	0.0140353	-0.00887319	-0.0118406	-0.0407164	0.00952118	0.00393962	-0.0481135	0.00724121	-0.00573673	-0.0387787	-0.0255097	-0.011268	-0.0320177	0.0102796	-0.019905	0.00573473
H0351.2001	abducens nucleus, Left	0.0186983	-0.00773784	0.0162258	-0.0191919	0.0209751	0.0666087	0.0226931	0.0321372	-0.0173127	-0.00225337	-0.00835326	-0.0128892	-0.0488996	-0.0126911	-0.0604141	-0.0694842	-0.0390596	-0.0524438	-0.0231957
H0351.2001	abducens nucleus, Right	0.015654	-0.00930816	0.00617377	-0.0320503	0.00766755	0.0123264	0.00639141	0.0122458	-0.0204862	-0.0408646	-0.0185503	0.0026369	-0.0297462	-0.00892432	-0.0182407	0.00157057	0.00269118	-0.0111217	-0.0240738
H0351.2001	pontine raphe nucleus	-0.0293053	-0.00880951	-0.0207858	0.000910452	-0.0184156	-0.0266737	-0.0050725	0.00713285	-0.0369334	-0.0270498	-0.034441	0.004027	0.0173088	0.0171193	0.00142277	0.0137655	-0.00983206	0.00727762	-0.0178625
H0351.2001	Superior Olivary Complex, Left	-0.00582304	-0.0236371	-0.0194173	-0.035485	0.0107844	0.0111719	0.0424763	0.0115312	-0.0163465	0.0229297	0.0341304	0.00816653	0.048756	0.000453984	0.00791955	0.0104092	-0.0151145	-0.00489747	-0.0327721
H0351.2001	Superior Olivary Complex, Right	-0.0408611	0.029088	-0.0417261	0.0725967	-0.0724049	-0.054302	-0.0295007	-0.0464174	-0.030443	0.0344129	-0.0170139	0.00485577	0.0237184	0.0375268	-0.0220273	-0.0172014	-0.0375177	0.0164375	-0.00561979
H0351.2001	pontine nuclei, Left	0.0319789	0.0214831	0.0161802	-0.00587159	-0.00702011	-0.0202475	-0.0208417	-0.0365853	-0.0119581	-0.0194458	-0.000840685	-0.014531	-0.0370584	-0.0179287	0.00843764	-0.0171742	0.0260234	0.0190853	-0.00636491
H0351.2001	pontine nuclei, Right	0.0333911	0.0182343	0.0210252	-0.0065054	0.00628594	-0.0127069	-0.021294	-0.0285848	-0.0150201	-0.0175608	0.00195547	-0.00992824	-0.0223339	-0.0146098	0.00673638	-0.0147939	0.0204341	-0.0012743	-0.0092704
H0351.2001	spinal trigeminal nucleus, Left	-0.0304696	-0.0191072	-0.0418602	-0.013801	-0.0169191	0.0036766	0.0263533	0.0268391	-0.0146416	0.0196595	0.00122177	-0.0117329	0.0566093	0.00961855	-0.000501509	0.0191035	-0.0195278	0.0199578	-0.0163808
H0351.2001	cochlear nuclei, Right	0.0368279	-0.000805801	0.0122312	-0.0310822	0.0254976	0.0179887	-0.00363924	0.000402816	-0.0251412	-0.0109332	-0.0198459	0.00404874	0.0238969	-0.0101054	-0.00475358	0.0090586	0.0183181	-0.00497546	-0.00754823
H0351.2001	inferior olivary complex, Left	-0.0509798	-0.0184155	-0.0592478	-0.0142562	-0.0253176	-0.0414564	0.00498181	0.0354078	-0.0134154	-0.0123236	-0.0419407	0.0181536	0.0504527	0.0323587	0.0106131	0.0553753	-0.037219	-0.00141979	-0.00489567
H0351.2001	inferior olivary complex, Right	-0.0495826	-0.0298965	-0.0496088	-0.00672537	-0.00894284	-0.0400745	0.0115266	0.042305	-0.00290219	0.0168805	-0.00349787	0.00513296	0.0649016	0.0195219	0.0381936	0.0649646	-0.0383033	-0.0316459	0.00175534
H0351.2001	arcuate nucleus of medulla, Left	0.0242992	0.0177589	-0.0146751	0.000545763	-0.045126	-0.0569211	-0.0330004	-0.0193268	-0.00390605	0.00456743	-0.0169548	-0.0231908	0.0510975	-0.00441433	0.0525181	0.0415773	-0.00371946	0.000699623	0.0139275
H0351.2001	pontine nuclei, Left	0.0401586	0.00907334	0.0455237	-0.000763993	0.0141078	0.0036279	-0.032055	-0.0428989	0.00204169	-0.00796794	0.02675	-0.0425448	-0.0212247	-0.0475949	0.0246365	-0.0124772	0.0550879	0.0125828	-0.0175251
H0351.2001	pontine nuclei, Right	0.0293102	-0.0029907	0.0451971	-0.00356936	0.0525587	0.0140991	-0.0264001	-0.0360377	-0.00689927	-0.0301917	0.00140235	0.00202339	-0.0110782	-0.0492743	0.0198941	-0.00759444	0.0397786	-0.0038538	-0.0276323
H0351.2001	arcuate nucleus of medulla, Left	0.037015	0.0165254	0.0256909	-0.00183356	-0.00261006	0.00237678	-0.0214247	-0.0162552	-0.0185706	0.00136607	0.0108361	-0.0257038	-0.0371511	-0.0287625	-0.00581901	-0.0281722	0.0123469	-0.00634841	-0.0176859
H0351.2001	arcuate nucleus of medulla, Right	0.0397601	0.0132227	0.0360441	0.000526527	0.00950255	0.00584485	-0.0271073	-0.0177747	-0.012554	0.0024306	0.0184896	-0.0299554	-0.020328	-0.0310221	-0.00323002	-0.0266497	0.0144667	-0.0265881	-0.0132051
H0351.2001	cochlear nuclei, Left	0.0145002	0.000977106	-0.00225959	-0.0148122	0.0260094	-0.0221877	-0.00876583	-0.0247734	-0.000205017	-0.0361161	-0.0373426	0.0520096	0.00919069	-0.00408494	0.0237013	0.0215575	0.0116971	0.017286	0.0139171
H0351.2001	gigantocellular group, Left	-0.0129867	-0.0137483	-0.0122637	-0.00791448	-0.0123936	-0.0012712	0.0280181	0.00408901	-0.0163291	0.0286247	0.0340087	-0.021894	-7.37061e-05	-0.00621736	0.0124605	0.004607	-0.0175664	-0.015895	-0.0157937
H0351.2001	gigantocellular group, Right	-0.0147922	-0.0082218	-0.0188738	-0.00917693	-0.0240707	-0.0167913	0.0139925	-0.00528357	-0.0173168	-0.0109895	-0.0109268	-0.0100322	0.0138974	0.00109476	0.0194118	0.0220297	0.00372712	0.014792	-0.00747716
H0351.2001	vestibular nuclei, Left	-0.010443	-0.0155765	-0.0320284	-0.0140684	-0.0116499	0.00136986	0.0059862	0.0354488	-0.0222198	0.017111	-0.0221924	-0.00448401	-0.00564259	0.00584549	-0.00456957	0.0122602	-0.0199478	0.00980616	-0.0185397
H0351.2001	vestibular nuclei, Right	-0.0268841	-0.0197644	-0.0478687	-0.0206517	-7.74343e-05	-0.027437	0.0103621	0.0417361	-0.0199363	0.00770011	-0.0120385	0.0191526	0.052359	0.0331035	0.0173678	0.0453766	-0.03978	-0.0121854	0.0128796
H0351.2001	Pontine Reticular Formation, Right	0.00755282	0.0265285	-0.023843	-0.00531056	-0.0307987	-0.0151841	0.0115839	-0.0176235	-0.00188943	-0.0184814	-0.0557326	0.0130371	-0.015931	0.0394467	-0.038775	-0.0279484	-0.0598659	-0.0284646	0.0215868
H0351.2001	Superior Olivary Complex, Left	-0.00206671	-0.00747373	-0.0264147	-0.0305213	0.00156203	0.0353075	0.0436414	0.0183082	-0.0176704	0.017494	-0.0258844	0.0149722	0.0152315	0.02468	-0.0454582	-0.0179671	-0.0437512	-0.0239559	0.0122861
H0351.2001	pontine nuclei, Right	0.0256421	0.00785122	0.013178	-0.0148831	-0.00261111	0.00676446	0.00657386	-0.0514026	-0.0229058	-0.0127041	-0.00073047	-0.00758289	-0.02874	-0.00590446	0.00779742	-0.00701608	0.0194535	0.0129608	-0.0239737
H0351.2001	spinal trigeminal nucleus, Right	-0.0316146	-0.0109823	-0.0421757	-0.00855017	-0.023396	-0.0133631	0.0259289	0.0111945	-0.0238664	0.0381328	0.00672862	-0.00307189	0.0275303	0.015638	0.00273	0.0264891	-0.0409804	0.00091365	-0.00785403
H0351.2001	abducens nucleus, Left	0.0304396	0.0126799	0.0013439	-0.0176761	-0.0107851	0.0235455	0.00522536	0.0172988	-0.0132757	-0.0123485	-0.0521823	0.00199316	-0.000754685	0.0173505	-0.0347883	-0.0227908	-0.0319698	-0.0350032	-0.00170241
H0351.2001	abducens nucleus, Right	0.0311606	-0.00065396	0.0168465	-0.0233486	0.0126378	0.0267492	0.00608607	0.0184711	-0.0358774	-0.0085315	-0.01591	-0.00533393	-0.0374894	-0.0114705	-0.0101034	-0.00762735	0.0108959	-0.0226144	-0.0446101
