# Supplementary material
Source: publisher figshare collection journal article supplement (https://plos.figshare.com/articles/dataset/_/127846)
Supplement: Supplementary file 1 [file 1 › Table_S3.xlsx]

## Sheet: Table S3
		Table S3 overlap of network with a previously published cortex network from Oldham et al.*
			Curent study
			Black	Blue	Brown	Cyan	Green	Greenyellow	Grey60	Lightcyan	Lightgreen	Lightyellow	Magenta	Midnightblue	Pink	Purple	Red	Salmon	Tan	Turquoise	Yellow
	Oldham et al.	Black	0 (NS)	0.44 (NS)	0 (NS)	0 (NS)	1.32 (NS)	1.09 (NS)	2.23 (NS)	0.8 (NS)	2.37 (NS)	0 (NS)	0.23 (NS)	3.59 (NS)	0 (NS)	0 (NS)	1.42 (NS)	1.45 (NS)	2.16 (NS)	0 (NS)	0.49 (NS)
		Blue	2.11 (NS)	0.34 (NS)	1.05 (NS)	0.45 (NS)	1.98 (P<2e-05)	1.07 (NS)	0.86 (NS)	0.74 (NS)	1.56 (NS)	0.7 (NS)	0.49 (NS)	0.7 (NS)	0 (NS)	0.74 (NS)	1.48 (P<2e-05)	1.03 (NS)	1.48 (NS)	0 (NS)	0.83 (NS)
		Brown	1 (NS)	0.28 (NS)	1 (NS)	1.07 (NS)	0.67 (NS)	0.2 (NS)	0.81 (NS)	0.49 (NS)	0.54 (NS)	0.66 (NS)	5.62 (P<2e-05)	1.33 (NS)	0 (NS)	0.7 (NS)	0.8 (NS)	0.57 (NS)	0.6 (NS)	4.51 (NS)	0.46 (NS)
		Darkolivegreen	0 (NS)	0 (NS)	0 (NS)	0 (NS)	0 (NS)	0 (NS)	83.44 (P<2e-05)	0 (NS)	0 (NS)	0 (NS)	0.62 (NS)	0 (NS)	0 (NS)	0 (NS)	0.65 (NS)	0 (NS)	0 (NS)	0 (NS)	0 (NS)
		Green	1.72 (NS)	0.39 (NS)	1.72 (NS)	2.23 (NS)	0.49 (NS)	1.95 (NS)	0.23 (NS)	0.95 (NS)	0.83 (NS)	0.38 (NS)	0.07 (NS)	1.14 (NS)	1.29 (NS)	3.06 (NS)	2.01 (P<2e-05)	1.65 (NS)	0.34 (NS)	0 (NS)	0.31 (NS)
		Greenyellow	0 (NS)	1.05 (NS)	0 (NS)	0 (NS)	0 (NS)	0 (NS)	0 (NS)	0 (NS)	4.85 (NS)	0 (NS)	0 (NS)	0 (NS)	0 (NS)	0 (NS)	2.56 (NS)	0 (NS)	0 (NS)	0 (NS)	0 (NS)
		Grey	0 (NS)	0.22 (NS)	5.51 (NS)	0 (NS)	0.79 (NS)	0.55 (NS)	0 (NS)	1.7 (NS)	0.32 (NS)	3.73 (NS)	0.48 (NS)	0 (NS)	4.13 (NS)	1.94 (NS)	1.14 (NS)	0.23 (NS)	3.35 (NS)	8.27 (NS)	4.05 (P=3e-05)
		Honeydew	0 (NS)	0 (NS)	0 (NS)	0 (NS)	0.53 (NS)	0 (NS)	1.52 (NS)	1.72 (NS)	0 (NS)	0 (NS)	0.24 (NS)	0 (NS)	0 (NS)	0 (NS)	2.82 (NS)	0.98 (NS)	0 (NS)	0 (NS)	2.17 (NS)
		Midnightblue	0 (NS)	0 (NS)	0 (NS)	0 (NS)	0 (NS)	0 (NS)	0 (NS)	0 (NS)	0 (NS)	0 (NS)	0.58 (NS)	0 (NS)	0 (NS)	0 (NS)	0 (NS)	0 (NS)	0 (NS)	0 (NS)	401.2 (P<2e-05)
		Orange	0 (NS)	1.61 (NS)	0 (NS)	0 (NS)	0.34 (NS)	0 (NS)	0 (NS)	2.29 (NS)	0.43 (NS)	0 (NS)	4.9 (P<2e-05)	4.86 (NS)	0 (NS)	0 (NS)	0.34 (NS)	0.31 (NS)	0 (NS)	0 (NS)	2.12 (NS)
		Palegreen	0 (NS)	0 (NS)	55.09 (P=0.00013)	0 (NS)	0 (NS)	0 (NS)	0 (NS)	0 (NS)	3.23 (NS)	0 (NS)	0 (NS)	0 (NS)	0 (NS)	0 (NS)	2.39 (NS)	0 (NS)	10.93 (NS)	0 (NS)	0 (NS)
		Pink	10.33 (NS)	0 (NS)	0 (NS)	4.49 (NS)	5.23 (P=1e-05)	0 (NS)	2.84 (NS)	0.5 (NS)	1.24 (NS)	0 (NS)	0.22 (NS)	0 (NS)	0 (NS)	3.63 (NS)	1.07 (NS)	1.87 (NS)	0 (NS)	0 (NS)	0.46 (NS)
		Powderblue	0 (NS)	0.53 (NS)	0 (NS)	0 (NS)	0 (NS)	0 (NS)	0 (NS)	0 (NS)	0 (NS)	0 (NS)	0 (NS)	0 (NS)	0 (NS)	0 (NS)	5.64 (NS)	1.76 (NS)	0 (NS)	0 (NS)	0 (NS)
		Purple	0 (NS)	0 (NS)	0 (NS)	5.86 (NS)	0 (NS)	0 (NS)	0 (NS)	1.34 (NS)	0 (NS)	0 (NS)	0 (NS)	0 (NS)	20.65 (NS)	0 (NS)	0.12 (NS)	0 (NS)	0 (NS)	0 (NS)	62.41 (P<2e-05)
		Red	0 (NS)	0.37 (NS)	0 (NS)	4.36 (NS)	0.76 (NS)	1.21 (NS)	0 (NS)	4.54 (P<2e-05)	0.47 (NS)	4.52 (NS)	0.52 (NS)	0 (NS)	5.99 (NS)	2.81 (NS)	0.9 (NS)	0.51 (NS)	3.23 (NS)	0 (NS)	0.73 (NS)
		Salmon	0 (NS)	0.35 (NS)	0 (NS)	0 (NS)	0 (NS)	0 (NS)	0 (NS)	1.34 (NS)	3.42 (NS)	0 (NS)	0 (NS)	0 (NS)	20.65 (NS)	0 (NS)	0.6 (NS)	9.73 (P=1e-05)	0 (NS)	0 (NS)	1.24 (NS)
		Tan	0 (NS)	0.94 (NS)	0 (NS)	0 (NS)	0 (NS)	0 (NS)	0 (NS)	0 (NS)	0 (NS)	3.65 (NS)	4.28 (NS)	0 (NS)	12.39 (NS)	0 (NS)	0.74 (NS)	1.45 (NS)	0 (NS)	0 (NS)	0.74 (NS)
		Tomato	0 (NS)	0.53 (NS)	0 (NS)	0 (NS)	0 (NS)	0 (NS)	20.02 (P=1e-05)	0 (NS)	8.73 (NS)	0 (NS)	0 (NS)	0 (NS)	0 (NS)	0 (NS)	0.64 (NS)	0 (NS)	0 (NS)	0 (NS)	1.86 (NS)
		Turquoise	0.78 (NS)	5.29 (P<2e-05)	0 (NS)	0.66 (NS)	0.6 (NS)	1.85 (NS)	0.53 (NS)	0.62 (NS)	0.65 (NS)	0.86 (NS)	0.17 (NS)	1.56 (NS)	0 (NS)	0.27 (NS)	0.42 (NS)	1.48 (NS)	0.78 (NS)	0 (NS)	0.61 (NS)
		Yellow	0 (NS)	0.23 (NS)	1.08 (NS)	0.69 (NS)	1.45 (NS)	0.77 (NS)	1.03 (NS)	1.5 (NS)	1.6 (NS)	1.45 (NS)	0.14 (NS)	0 (NS)	0.81 (NS)	1.14 (NS)	1.98 (P<2e-05)	0.52 (NS)	0.86 (NS)	0 (NS)	0.7 (NS)
		The table show the enrichment measured by relative risk (P-value). Bonferroni significant enrichment signals P<0.00013 are reported. Non significant values are reported as NS
		*Oldham MC, Konopka G, Iwamoto K, Langfelder P, Kato T, et al. (2008) Functional organization of the transcriptome in human brain. Nat Neurosci 11: 1271–1282. Doi:10.1038/nn.2207
