# Supplementary material
Source: publisher figshare collection journal article supplement (https://plos.figshare.com/articles/dataset/_/127846)
Supplement: Supplementary file 1 [file 1 › Table_S4.xlsx]

## Sheet: Table S4
Table S4
Module Name	GO terms	Corrected P values
Turquoise	NONE
Blue	Cytoskeletal protein binding	0.001
Brown	NONE
Yellow	Translational elongation	7.4e-98
Green	Nuclear lumen; Intracellular organelle lumen; RNA processing	5.8E-7; 4.7E-7; 4.6E-3
Red	Mitochondrion; DNA binding; Regulation of transcription	2.9E-40; 6.6×E-23; 2.2E-21
Black	Nucleosome core	1e-31
Pink	Krueppel-associated box	2.2e-46
Magenta	Glycoprotein; Signal peptide	1.1E-16; 4.6E-15
Purple	NONE	1
Greenyellow	Cell cycle	0.00054
Tan	Zinc ion binding	0.0053
Salmon	Synapse; synaptic transmission; Calmodulin binding	2.2E-6; 4.8E-3; 9.9E-4
Cyan	NONE	1
Midnightblue	Compositionally biased region: Poly-Gly	0.0017
Lightcyan	GPCR, Rhodopsin-like superfamily; Olfactory receptor activity; Secreted; Hormone activity; Homeobox; Keratin	2.6E-50; 2.2E-42; 1.1E-28; 2.2E-14; 1.6E-11
Grey60	Membrane	0.013
Lightgreen	Synapse; Transmission of nerve impulse	1.6E-5; 6.5E-2
Lightyellow	Intracellular organelle lumen; Enzyme binding	5.3E-7; 1.9E-2
Table S4. GO terms enriched in the different modules. For module Red, due to its size, the 3000 genes with the highest correlation with the module eigengene, and the 3000 genes with the lowest correlation with the module eigengene were tested apart.
