# Supplementary material
Source: publisher figshare collection journal article supplement (https://plos.figshare.com/articles/dataset/_/127846)
Supplement: Supplementary file 1 [file 1 › Table_S5.xlsx]

## Sheet: TableS5
	Table S5
	Module Name	Number of genes	The top 10 Regions with highest level of expression based on the module eigengene
	turquoise	38	inferior temporal gyrus, Right, lateral bank of gyrus,cingulum bundle, Left,planum polare, Left,middle temporal gyrus, Right, superior bank of gyrus,CA3 field, Left,superior temporal gyrus, Right, lateral bank of gyrus,CA4 field, Right,CA4 field, Left,frontal operculum, Left,CA4 field, Left
	blue	1423	corpus callosum,cingulum bundle, Right,cingulum bundle, Left,corpus callosum,subcollosal gyrus, Right,globus pallidus, internal segment, Left,superior frontal gyrus, Right, lateral bank of gyrus,corpus callosum,globus pallidus, internal segment, Right,globus pallidus, external segment, Left
	brown	52	Cingulate gyrus, frontal part, Right, inferior bank of gyrus,superior frontal gyrus, Left, medial bank of gyrus,Inferior frontal gyrus, triangular part, Left,medial orbital gyrus, Right,middle frontal gyrus, Right, superior bank of gyrus,inferior rostral gyrus, Left,precuneus, Right, superior lateral bank of gyrus,superior temporal gyrus, Left, inferior bank of gyrus,superior frontal gyrus, Left,…
	yellow	744	corpus callosum,globus pallidus, internal segment, Right,subcollosal gyrus, Right,globus pallidus, internal segment, Left,globus pallidus, internal segment, Right,temporal pole, Right, medial aspect,globus pallidus, internal segment, Right,Red Nucleus, Right,globus pallidus, external segment, Left,globus pallidus, internal segment, Left
	green	641	cingulum bundle, Left,angular gyrus, Left, inferior bank of gyrus,parahippocampal gyrus, Left, lateral bank of gyrus,lingual gyrus, Left, striate,cingulum bundle, Right,superior temporal gyrus, Right, lateral bank of gyrus,lingual gyrus, Left, striate,lingual gyrus, Right, striate,Cingulate gyrus, frontal part, Left, superior bank of gyrus,lingual gyrus, Right, striate
	red	7385	arcuate nucleus of medulla, Right,arcuate nucleus of medulla, Right,middle temporal gyrus, Left, inferior bank of gyrus,middle temporal gyrus, Right, inferior bank of gyrus,Tail of Caudate Nucleus, Right,temporal pole, Right, superior aspect,arcuate nucleus of medulla, Right,inferior occipital gyrus, Right, superior bank of gyrus,middle frontal gyrus, Right, inferior bank of gyrus,locus ceruleus,…
	black	59	corpus callosum,cingulum bundle, Left,corpus callosum,Putamen, Right,III, Right Paravermis,angular gyrus, Left, inferior bank of gyrus,globus pallidus, external segment, Left,subcollosal gyrus, Right,globus pallidus, internal segment, Left,cingulum bundle, Right
	pink	163	Cingulate gyrus, frontal part, Right, inferior bank of gyrus,lingual gyrus, Right, peristriate,precuneus, Right, superior lateral bank of gyrus,frontal pole, Left, inferior aspect,corpus callosum,precentral gyrus, Left, inferior lateral aspect of gyrus,planum polare, Left,middle temporal gyrus, Right, superior bank of gyrus,Putamen, Right,Dentate gyrus, Left
	magenta	1032	globus pallidus, internal segment, Right,Putamen, Right,globus pallidus, internal segment, Left,Putamen, Left,globus pallidus, external segment, Right,globus pallidus, internal segment, Left,Putamen, Left,Putamen, Left,globus pallidus, external segment, Left,Putamen, Left
	purple	180	Zona Incerta, Right,corpus callosum,Oculomotor Nuclear Complex, Right,CA2 field, Right,Cortico-medial group, Left,Basolateral Nucleus, Left,VIIIA, Left Paravermis,Long Insular Gyri, Left,ventral tegmental area, Right,Dorsal Lateral Geniculate Nucleus, Left
	greenyellow	174	corpus callosum,corpus callosum,Red Nucleus, Right,cingulum bundle, Right,precuneus, Left, , inferior lateral bank of gyrus,Paraventricular Nuclei, Left of Thalamus, Left,cingulum bundle, Left,corpus callosum,globus pallidus, external segment, Right,superior frontal gyrus, Right, lateral bank of gyrus
	tan	278	lingual gyrus, Right, striate,VIIAt,precuneus, Left, , inferior lateral bank of gyrus,lingual gyrus, Left, striate,VI, Left Lateral Hemisphere,Paraventricular Nuclei, Left of Thalamus, Left,VIIIA, Left Paravermis,Crus I, Right Paravermis,lingual gyrus, Right, striate,lingual gyrus, Right, striate
	salmon	569	Dentate gyrus, Right,CA1 field, Left,Tail of Caudate Nucleus, Right,Dentate gyrus, Right,Putamen, Left,Superior Olivary Complex, Right,Nucleus Accumbens, Left,Putamen, Left,Head of Caudate Nucleus, Left,Head of Caudate Nucleus, Left
	cyan	371	Zona Incerta, Right,Oculomotor Nuclear Complex, Right,CA2 field, Right,corpus callosum,Basolateral Nucleus, Left,CA4 field, Left,VIIIA, Left Paravermis,Cortico-medial group, Left,ventral tegmental area, Right,Long Insular Gyri, Left
	midnightblue	82	precentral gyrus, Left, inferior lateral aspect of gyrus,superior frontal gyrus, Left, lateral bank of gyrus,CA3 field, Left,central medullary reticular group, Left,supraparietal lobule, Right, inferior bank of gyrus,inferior rostral gyrus, Right,CA3 field, Left,middle frontal gyrus, Right, superior bank of gyrus,central medullary reticular group, Right,middle temporal gyrus, Right, superior bank…
	lightcyan	2251	CA3 field, Left,CA4 field, Left,Dorsal Lateral Geniculate Nucleus, Left,CA4 field, Left,CA3 field, Left,Claustrum, Left,lingual gyrus, Right, peristriate,Body of Caudate Nucleus, Left,superior frontal gyrus, Left, medial bank of gyrus,Claustrum, Right
	grey60	239	Dorsal Lateral Geniculate Nucleus, Left,superior temporal gyrus, Right, inferior bank of gyrus,Dorsal Lateral Geniculate Nucleus, Right,Dentate Nucleus, Right,arcuate nucleus of medulla, Right,post central gyrus, Right, superior lateral aspect of gyrus,arcuate nucleus of medulla, Left,pontine nuclei, Left,Lateral group of Nuclei, Left, Ventral division,Lateral group of Nuclei, Right, Ventral divi…
	lightgreen	480	inferior occipital gyrus, Right, superior bank of gyrus,lingual gyrus, Left, striate,post central gyrus, Left, superior lateral aspect of gyrus,lingual gyrus, Right, striate,lingual gyrus, Left, striate,lingual gyrus, Right, striate,lingual gyrus, Right, striate,paracentral lobule, anterior part, Right, superior bank of gyrus,post central gyrus, Right, bank of the central sulcus,post central gyru…
	lightyellow	137	VI, Left Lateral Hemisphere,post central gyrus, Left, bank of the central sulcus,superior frontal gyrus, Right, lateral bank of gyrus,Paraventricular Nuclei, Left of Thalamus, Left,precentral gyrus, Right, inferior lateral aspect of gyrus,precuneus, Left, , inferior lateral bank of gyrus,corpus callosum,middle frontal gyrus, Right, inferior bank of gyrus,gyrus rectus, Left,VIIIA, Left Paravermis
