# Supplementary material
Source: publisher figshare collection journal article supplement (https://plos.figshare.com/articles/dataset/_/127846)
Supplement: Supplementary file 1 [file 1 › Table_S6.xlsx]

## Sheet: TableS6
	Table S6. Top Association signals in the SSC sample
	Chromosome	SNP	bp position	A1	A2	T	U	OR	CHISQ	P
	13	rs9569548	56351332	C	T	220	328	0.6707	21.28	3.959e-06
	13	rs9569549	56355405	C	T	220	328	0.6707	21.28	3.959e-06
	6	rs3800143	1887537	C	T	221	329	0.6717	21.21	4.122e-06
	13	rs7319121	56336063	G	T	219	326	0.6718	21.01	4.575e-06
	1	rs10910078	2380448	C	T	248	359	0.6908	20.3	6.626e-06
	2	rs6436915	230742768	T	G	342	234	1.462	20.25	6.795e-06
	17	rs12947286	73057549	C	T	234	342	0.6842	20.25	6.795e-06
	13	rs6561901	56387777	A	G	221	326	0.6779	20.16	7.14e-06
	13	rs7989726	56337338	G	T	223	327	0.682	19.67	9.225e-06
	6	rs3800119	1830971	T	C	209	310	0.6742	19.66	9.276e-06
	T, Transmitted; U, Untransmitted; OR, Odds ratio; CHISQ, chi-squared statistics
