# Supplementary material
Source: publisher figshare collection journal article supplement (https://plos.figshare.com/articles/dataset/_/127846)
Supplement: Supplementary file 1 [file 1 › Table_S7.xlsx]

## Sheet: TableS7
	Table S7 Replication of association signals from previous studies
	SNP	Chromosome	Position	Proxyǂ	R2	P-value in SSC	P-value in AGP	Study
	rs17088254	4	68019960	rs356306	0.892	0.7472		Weiss and Arking et al*
	rs2632453	4	68189460	rs17088445	1	0.8059		Weiss and Arking et al*
	rs10513025	5	9676622					Weiss and Arking et al*
	rs13208655	6	15365718	rs6921502	0.967	0.07693	0.9764	Weiss and Arking et al*
	rs7766973	6	15376030					Weiss and Arking et al*
	rs4742408	9	7763723					Weiss and Arking et al*
	rs4742409	9	7764180					Weiss and Arking et al*
	rs6477233	9	7764774					Weiss and Arking et al*
	rs952834	9	86471331	rs4492454	1	0.7448	0.2291	Weiss and Arking et al*
	rs7923367	10	68842909					Weiss and Arking et al*
	rs12293188	11	22775950	rs7105185	1	0.7357	0.8042	Weiss and Arking et al*
	rs16910190	11	22785182	rs1019216	0.945	0.4762	0.8996	Weiss and Arking et al*
	rs16910194	11	22785488	rs16910190	0.943	0.4381	0.9347	Weiss and Arking et al*
	rs3763947	11	22791645	rs7111546	1	0.6969		Weiss and Arking et al*
	rs4307059	5	26003460			0.2702	0.8523	Wang et al**
	rs7704909	5	25934678			0.7371	1	Wang et al**
	rs12518194	5	25987318			0.3551	0.9759	Wang et al**
	rs4327572	5	26009578			0.3534	0.976	Wang et al**
	rs1896731	5	25934777			0.9654	0.5312	Wang et al**
	rs10038113	5	25938099			0.7029	0.6094	Wang et al**
	rs6731562	2	172506508			0.5994		Anney et al***
	rs10258862	7	39083323			0.5393		Anney et al***
	rs6557675	8	23396491			1		Anney et al***
	rs4078417	14	50826632			0.1172		Anney et al***
	rs7142002	14	101430498			0.4517		Anney et al***
	rs17284809	16	15730301			0.7797		Anney et al***
	rs205409	16	27971449			0.8707		Anney et al***
	rs4150167	16	82771185					Anney et al***
	rs4141463	20	14695471			0.2971		Anney et al***
	ǂFor SNPs not available in a cohort, a proxy with R2>0.8 (based on 1000 genomes project CEU data) was tested, if available.
	*Weiss LA, Arking DE (2009) A genome-wide linkage and association scan reveals novel loci for autism. Nature 461: 802–808. doi:10.1038/nature08490.
	**Wang K, Zhang H, Ma D, Bucan M, Glessner JT, et al. (2009) Common genetic variants on 5p14.1 associate with autism spectrum disorders. Nature 459: 528–533. doi:10.1038/nature07999.
	***Anney R, Klei L, Pinto D, Regan R, Conroy J, et al. (2010) A genome-wide scan for common alleles affecting risk for autism. Human Molecular Genetics 19: 4072–4082. doi:10.1093/hmg/ddq307.
	Replication in the AGP are not reported for the Anney et al study, as the AGP was the discovery cohort in that study. Replication in the AGP are not reported for the Anney et al study, as the AGP was the discovery cohort in that study.
