# Supplementary material
Source: publisher figshare collection journal article supplement (https://plos.figshare.com/articles/dataset/_/127846)
Supplement: Supplementary file 1 [file 1 › Table_S8.xlsx]

## Sheet: TableS8
	Table S8. candidate genes with gene-wide P-value < 0.05 that contributed to the enrichment score
	Module	Gene	Minimum P	Gene-wide P	Cohort
	Lightgreen	POU6F2	1.958e-06	0.000319154	AGP
	Salmon	IDS	7.9e-05	0.00055	AGRE
	Lightgreen	CDH18	1.1e-05	0.00083	AGRE
	Salmon	MACROD2	1.324e-06	0.000909588	AGP
	Salmon	GMDS	4.122e-06	0.00104287	SSC
	Lightgreen	ATP2B2	6.944e-06	0.00106938	AGP
	Salmon	SLC35F2	6.7e-05	0.0011	AGRE
	Salmon	GPR98	1.4e-05	0.0017	AGRE
	Lightgreen	SOST	0.0002218	0.0028834	SSC
	Lightgreen	CHODL	0.0001104	0.003864	AGP
	Lightgreen	TSPAN5	7.061e-05	0.00508392	AGP
	Lightgreen	GDI1	0.003	0.006	AGRE
	Lightgreen	XYLB	0.00056	0.0084	AGRE
	Lightgreen	C20orf26	9.294e-05	0.0117104	SSC
	Salmon	GLT8D2	0.00091	0.012	AGRE
	Lightgreen	SLC25A36	0.0042	0.012	AGRE
	Salmon	C17orf108	0.002	0.014	AGRE
	Salmon	PACRGL	0.0029	0.014	AGRE
	Lightgreen	MAPK9	0.0007353	0.014706	AGP
	Salmon	ZMAT2	0.002202	0.015414	SSC
	Salmon	BIRC3	0.001745	0.015705	SSC
	Salmon	YWHAZ	0.0002692	0.0158828	AGP
	Lightgreen	SETBP1	6.389e-05	0.0161642	SSC
	Salmon	RASL10B	0.005509	0.016527	AGP
	Lightgreen	CHRD	0.008415	0.01683	AGP
	Salmon	EFCAB6	0.0001927	0.0171503	SSC
	Salmon	RASGRF2	0.0001315	0.017884	AGP
	Lightgreen	BBS7	0.001626	0.017886	AGP
	Lightgreen	DMD	3.2e-05	0.018	AGRE
	Salmon	SPRY1	0.0003958	0.0182068	SSC
	Lightgreen	NCOR2	0.0002038	0.0199724	AGP
	Salmon	EGR3	0.0033	0.02	AGRE
	Lightgreen	ELAVL2	0.0004	0.02	AGRE
	Salmon	TRAIP	0.002521	0.020168	AGP
	Salmon	ICAM5	0.005205	0.02082	SSC
	Salmon	PDE2A	0.0003384	0.0209808	SSC
	Salmon	EPS8L2	0.0036	0.022	AGRE
	Salmon	FLJ36031	0.0007998	0.0223944	SSC
	Lightgreen	RSPO2	0.00061	0.023	AGRE
	Lightgreen	IQSEC3	0.0005552	0.0244288	SSC
	Salmon	CAMKV	0.003563	0.024941	SSC
	Salmon	C4orf44	0.013	0.025	AGRE
	Salmon	DGKH	0.00036	0.025	AGRE
	Lightgreen	TSHZ3	0.0004083	0.0253146	AGP
	Lightgreen	C6orf174	0.0019	0.026	AGRE
	Salmon	SNAP47	0.0045	0.027	AGRE
	Lightgreen	STX1B	0.014	0.028	AGRE
	Lightgreen	TCERG1L	0.00037	0.028	AGRE
	Salmon	DZIP3	0.001168	0.028032	SSC
	Lightgreen	TRAF3	0.0008416	0.0286144	AGP
	Lightgreen	GTDC1	0.0003681	0.0287118	SSC
	Salmon	SORCS3	8.008e-05	0.0293894	SSC
	Salmon	SEPT6	0.002	0.03	AGRE
	Lightgreen	PRKAR2A	0.001433	0.030093	AGP
	Lightgreen	RASSF5	0.0019	0.031	AGRE
	Salmon	FBXL18	0.011	0.033	AGRE
	Lightgreen	OXSR1	0.002583	0.036162	SSC
	Salmon	KLHL25	0.0004765	0.036214	AGP
	Salmon	LOC441461	0.00735	0.03675	AGP
	Lightgreen	ELMO1	0.0001959	0.0387882	AGP
	Lightgreen	PCDHA11	0.01319	0.03957	SSC
	Salmon	LOC729722	0.01984	0.03968	AGP
	Lightgreen	OLFM1	0.0013	0.04	AGRE
	Salmon	ZNF469	0.00118	0.04012	SSC
	Lightgreen	VIP	0.0041	0.041	AGRE
	Lightgreen	FBXW7	0.0003857	0.0416556	SSC
	Lightgreen	PBX3	0.0004581	0.0416871	AGP
	Lightgreen	KCNS2	0.001547	0.041769	AGP
	Lightgreen	AK7	0.001416	0.04248	SSC
	Salmon	FAM71F1	0.0072	0.043	AGRE
	Lightgreen	FBXW7	0.0047	0.043	AGRE
	Salmon	PLK2	0.0006697	0.0435305	SSC
	Salmon	MKL2	0.0029	0.044	AGRE
	Lightgreen	IQSEC3	0.001321	0.044914	AGP
	Salmon	LRPAP1	0.011	0.045	AGRE
	Lightgreen	RASGRF1	0.0006951	0.0458766	AGP
	Lightgreen	ABCC8	0.0018	0.046	AGRE
	Salmon	CDH11	0.0022	0.046	AGRE
	Salmon	FAM149A	0.00195	0.0468	AGP
	Lightgreen	HPGD	0.0007038	0.0471546	SSC
	Lightgreen	TSNAX	0.003188	0.04782	SSC
	Salmon	MACROD2	5.868e-05	0.0487044	SSC
	Lightgreen	ZNF252	0.016	0.049	AGRE
	Lightgreen	TM2D2	0.008332	0.049992	AGP
	Salmon	E2F3	0.0016	0.05	AGRE
