# Supplementary material
Source: publisher figshare collection journal article supplement (https://plos.figshare.com/articles/dataset/_/127846)
Supplement: Supplementary file 1 [file 1 › Table_S9.xlsx]

## Sheet: H0351.2001
Table S9.1: Microarray measurements in donor H0351.2001
structure_id	slab_num	well_id	slab_type	structure_acronym	structure_name	polygon_id	mri_x *	mri_y	mri_z
4890	2	97	CX	FP-s	frontal pole, Left, superior aspect	28028	85	96	19
4193	30	98	CX	LiG-pest	lingual gyrus, Left, peristriate	27908	98	123	160
4114	30	185	CX	AnG-i	angular gyrus, Left, inferior bank of gyrus	27902	126	82	161
4101	30	105	CX	SPL-s	supraparietal lobule, Right, superior bank of gyrus	27883	61	47	156
4049	4	115	CX	GRe	gyrus rectus, Right	27164	91	103	27
4052	4	107	CX	MOrG	medial orbital gyrus, Right	27163	84	103	29
4026	4	162	CX	SFG-m	superior frontal gyrus, Right, medial bank of gyrus	28033	86	79	22
4902	4	170	CX	IRoG	inferior rostral gyrus, Right	28034	90	86	22
4027	4	114	CX	SFG-l	superior frontal gyrus, Right, lateral bank of gyrus	27250	68	74	27
4033	4	209	CX	MFG-s	middle frontal gyrus, Right, superior bank of gyrus	27251	67	82	28
4033	4	130	CX	MFG-s	middle frontal gyrus, Right, superior bank of gyrus	27251	67	82	28
4034	4	138	CX	MFG-i	middle frontal gyrus, Right, inferior bank of gyrus	27253	52	90	28
4055	4	154	CX	AOrG	anterior orbital gyrus, Right	27255	74	96	29
4061	4	146	CX	LOrG	lateral orbital gyrus, Right	27254	60	91	29
4045	6	194	CX	orIFG	inferior frontal gyrus, orbital part, Left	27853	128	92	36
4060	6	281	CX	LOrG	lateral orbital gyrus, Left	27854	125	90	36
4049	6	273	CX	GRe	gyrus rectus, Right	27842	86	105	37
4901	6	257	CX	IRoG	inferior rostral gyrus, Left	27841	98	95	33
4023	6	225	CX	SFG-m	superior frontal gyrus, Left, medial bank of gyrus	27684	93	62	32
4899	6	233	CX	SRoG	superior rostral gyrus, Right	28093	89	75	32
4033	6	217	CX	MFG-s	middle frontal gyrus, Right, superior bank of gyrus	27644	63	76	30
4193	28	259	CX	LiG-pest	lingual gyrus, Left, peristriate	27602	103	120	150
4200	28	275	CX	OTG-s	occipito-temporal gyrus, Left, superior bank of gyrus	27600	126	114	154
4201	28	267	CX	OTG-i	occipito-temporal gyrus, Left, inferior bank of gyrus	27601	110	122	152
4196	28	251	CX	LiG-pest	lingual gyrus, Right, peristriate	27596	73	119	155
4197	28	243	CX	LiG-str	lingual gyrus, Right, striate	27595	79	118	152
4189	28	219	CX	Cun-pest	cuneus, Right, peristriate	27488	81	90	147
4197	28	211	CX	LiG-str	lingual gyrus, Right, striate	27489	80	98	147
4114	28	195	CX	AnG-i	angular gyrus, Left, inferior bank of gyrus	27442	133	79	154
4214	28	203	CX	SOG-s	superior occipital gyrus, Left, superior bank of gyrus	27443	132	89	154
4116	28	202	CX	AnG-s	angular gyrus, Right, superior bank of gyrus	27317	57	63	150
4124	28	274	CX	Pcu-i	precuneus, Right, inferior lateral bank of gyrus	27341	85	82	146
4102	28	250	CX	SPL-i	supraparietal lobule, Right, inferior bank of gyrus	27330	64	75	149
4117	28	258	CX	AnG-i	angular gyrus, Right, inferior bank of gyrus	27331	56	89	155
4217	28	266	CX	SOG-s	superior occipital gyrus, Right, superior bank of gyrus	27332	50	94	155
4099	28	234	CX	SPL-i	supraparietal lobule, Left, inferior bank of gyrus	27323	125	61	146
4113	28	242	CX	AnG-s	angular gyrus, Left, superior bank of gyrus	27324	128	49	149
4101	28	210	CX	SPL-s	supraparietal lobule, Right, superior bank of gyrus	27307	86	32	143
4123	28	226	CX	Pcu-s	precuneus, Right, superior lateral bank of gyrus	27306	87	53	143
4197	26	298	CX	LiG-str	lingual gyrus, Right, striate	36906	84	92	139
4145	26	377	CX	MTG-s	middle temporal gyrus, Right, superior bank of gyrus	27985	54	101	147
4155	26	290	CX	ITG-mts	inferior temporal gyrus, Right, bank of mts	27984	60	107	146
4101	30	113	CX	SPL-s	supraparietal lobule, Right, superior bank of gyrus	27868	81	53	153
4123	30	121	CX	Pcu-s	precuneus, Right, superior lateral bank of gyrus	27869	88	63	151
4186	28	227	CX	Cun-pest	cuneus, Left, peristriate	27487	94	86	146
4194	28	235	CX	LiG-str	lingual gyrus, Left, striate	27486	99	97	148
4121	28	282	CX	Pcu-i	precuneus, Left, , inferior lateral bank of gyrus	27342	97	81	143
4048	4	123	CX	GRe	gyrus rectus, Left	27165	94	102	26
4051	4	131	CX	MOrG	medial orbital gyrus, Left	27166	105	98	25
4048	6	265	CX	GRe	gyrus rectus, Left	27840	101	102	33
4023	4	178	CX	SFG-m	superior frontal gyrus, Left, medial bank of gyrus	28035	97	72	22
4120	28	218	CX	Pcu-s	precuneus, Left, , superior lateral bank of gyrus	27308	97	43	141
4121	30	161	CX	Pcu-i	precuneus, Left, , inferior lateral bank of gyrus	27894	90	69	149
4124	30	153	CX	Pcu-i	precuneus, Right, inferior lateral bank of gyrus	27893	97	76	150
4187	30	177	CX	Cun-str	cuneus, Left, striate	27890	97	88	155
4190	30	169	CX	Cun-str	cuneus, Right, striate	27892	84	101	170
4098	30	129	CX	SPL-s	supraparietal lobule, Left, superior bank of gyrus	27873	111	46	154
4099	30	193	CX	SPL-i	supraparietal lobule, Left, inferior bank of gyrus	28018	109	56	155
4099	30	137	CX	SPL-i	supraparietal lobule, Left, inferior bank of gyrus	28018	109	56	155
4113	30	145	CX	AnG-s	angular gyrus, Left, superior bank of gyrus
4030	4	99	CX	MFG-s	middle frontal gyrus, Left, superior bank of gyrus	28013	127	82	24
4024	6	241	CX	SFG-l	superior frontal gyrus, Left, lateral bank of gyrus	27725	119	55	42
4033	4	122	CX	MFG-s	middle frontal gyrus, Right, superior bank of gyrus	27251	67	82	28
4023	4	186	CX	SFG-m	superior frontal gyrus, Left, medial bank of gyrus	28035	97	72	22
4193	30	106	CX	LiG-pest	lingual gyrus, Left, peristriate	27908	98	123	160
4902	6	249	CX	IRoG	inferior rostral gyrus, Right	27843	85	92	36
4273	10	961	CX	SIG	Short Insular Gyri, Left	28153	127	84	57
4092	24	428	CX	PoG-cs	post central gyrus, Right, bank of the central sulcus	35008	78	40	124
4201	22	969	CX	OTG-i	occipito-temporal gyrus, Left, inferior bank of gyrus	37564	137	116	122
4158	18	973	CX	FuG-its	fusiform gyrus, Left, bank of the its	39559	133	117	105
4159	18	981	CX	FuG-l	fusiform gyrus, Left, lateral bank of gyrus	39560	126	121	105
4160	18	989	CX	FuG-cos	fusiform gyrus, Left, bank of cos	39561	123	111	103
4164	18	965	CX	FuG-cos	fusiform gyrus, Right, bank of cos	39527	62	112	107
4163	18	1052	CX	FuG-l	fusiform gyrus, Right, lateral bank of gyrus	39526	58	121	109
4166	18	1044	CX	HG	Heschel's gyrus, Left	39516	132	86	100
4270	18	1036	CX	LIG	Long Insular Gyri, Left	39515	126	77	99
4288	18	1028	CX	Pu	Putamen, Left	39517	122	87	100
4167	18	1020	CX	HG	Heschel's gyrus, Right	39483	52	86	104
4271	18	1012	CX	LIG	Long Insular Gyri, Right	39487	64	89	104
4136	18	1051	CX	STG-i	superior temporal gyrus, Left, inferior bank of gyrus	39467	152	94	104
4142	18	964	CX	MTG-s	middle temporal gyrus, Left, superior bank of gyrus	39466	147	102	105
4143	18	980	CX	MTG-i	middle temporal gyrus, Left, inferior bank of gyrus	39465	149	115	105
4150	18	996	CX	ITG-l	inferior temporal gyrus, Left, lateral bank of gyrus	39472	141	122	105
4151	18	988	CX	ITG-mts	inferior temporal gyrus, Left, bank of mts	39464	142	115	105
4138	18	1035	CX	STG-l	superior temporal gyrus, Right, lateral bank of gyrus	39451	27	92	104
4139	18	1027	CX	STG-i	superior temporal gyrus, Right, inferior bank of gyrus	39452	35	97	106
4145	18	1011	CX	MTG-s	middle temporal gyrus, Right, superior bank of gyrus	39454	43	99	108
4146	18	1043	CX	MTG-i	middle temporal gyrus, Right, inferior bank of gyrus	39448	42	108	109
4153	18	979	CX	ITG-its	inferior temporal gyrus, Right, bank of the its	39453	47	118	109
4154	18	1003	CX	ITG-l	inferior temporal gyrus, Right, lateral bank of gyrus	73248	34	118	109
4155	18	995	CX	ITG-mts	inferior temporal gyrus, Right, bank of mts	39446	42	111	109
4162	18	971	CX	FuG-its	fusiform gyrus, Right, bank of the its	39447	51	118	109
4094	18	1034	CX	PoG-il	post central gyrus, Right, inferior lateral aspect of gyrus	39410	28	77	104
4173	18	1042	CX	PLT	planum temporale, Right	39409	37	84	104
4012	18	1010	CX	PrG-prc	precentral gyrus, Left, bank of the precentral sulcus	39374	123	49	90
4013	18	1018	CX	PrG-sl	precentral gyrus, Left, superior lateral aspect of gyrus	39375	135	42	92
4014	18	1026	CX	PrG-il	precentral gyrus, Left, inferior lateral aspect of gyrus	39376	147	53	92
4031	18	1002	CX	MFG-i	middle frontal gyrus, Left, inferior bank of gyrus	39373	124	40	89
4023	18	970	CX	SFG-m	superior frontal gyrus, Left, medial bank of gyrus	39363	95	37	86
4024	18	978	CX	SFG-l	superior frontal gyrus, Left, lateral bank of gyrus	39362	111	39	86
4030	18	986	CX	MFG-s	middle frontal gyrus, Left, superior bank of gyrus	39361	115	39	86
4026	18	962	CX	SFG-m	superior frontal gyrus, Right, medial bank of gyrus	39345	84	48	100
4017	18	1017	CX	PrG-prc	precentral gyrus, Right, bank of the precentral sulcus	39319	58	46	97
4018	18	1025	CX	PrG-sl	precentral gyrus, Right, superior lateral aspect of gyrus	39329	51	43	97
4019	18	1033	CX	PrG-il	precentral gyrus, Right, inferior lateral aspect of gyrus	39330	45	48	97
4020	18	1041	CX	PrG-cs	precentral gyrus, Right, bank of the central sulcus	39331	48	54	99
4027	18	985	CX	SFG-l	superior frontal gyrus, Right, lateral bank of gyrus	39316	70	50	96
4033	18	993	CX	MFG-s	middle frontal gyrus, Right, superior bank of gyrus	39317	67	49	97
4034	18	1009	CX	MFG-i	middle frontal gyrus, Right, inferior bank of gyrus	39318	60	43	97
4092	18	1049	CX	PoG-cs	post central gyrus, Right, bank of the central sulcus	39332	47	57	100
4015	18	963	CX	PrG-cs	precentral gyrus, Left, bank of the central sulcus	39417	144	62	95
4087	18	1050	CX	PoG-cs	post central gyrus, Left, bank of the central sulcus	39416	148	61	96
4023	8	362	CX	SFG-m	superior frontal gyrus, Left, medial bank of gyrus	28050	94	55	46
4033	18	1001	CX	MFG-s	middle frontal gyrus, Right, superior bank of gyrus	39320	66	46	97
4030	18	994	CX	MFG-s	middle frontal gyrus, Left, superior bank of gyrus	39366	117	36	86
4153	18	987	CX	ITG-its	inferior temporal gyrus, Right, bank of the its	39444	49	116	109
4145	18	1019	CX	MTG-s	middle temporal gyrus, Right, superior bank of gyrus	39450	46	99	108
4150	18	1004	CX	ITG-l	inferior temporal gyrus, Left, lateral bank of gyrus	39463	143	122	105
4142	18	972	CX	MTG-s	middle temporal gyrus, Left, superior bank of gyrus	39471	150	101	105
4288	14	977	CX	Pu	Putamen, Left	39235	117	85	83
4020	16	946	CX	PrG-cs	precentral gyrus, Right, bank of the central sulcus	38934	39	72	88
4299	16	966	CX	GPi	globus pallidus, internal segment, Right	714243	73	92	93
4149	16	974	CX	ITG-its	inferior temporal gyrus, Left, bank of the its	39396	133	111	93
4159	16	982	CX	FuG-l	fusiform gyrus, Left, lateral bank of gyrus	39394	125	120	93
4244	16	998	CX	PHG-l	parahippocampal gyrus, Left, lateral bank of gyrus	39392	112	115	93
4245	16	990	CX	PHG-cos	parahippocampal gyrus, Left, bank of the cos	39393	117	116	93
4230	18	997	CX	CgGp-s	Cingulate gyrus, parietal part, Left, superior bank of gyrus	39592	100	59	86
4231	18	1005	CX	CgGp-i	Cingulate gyrus, parietal part, Left, inferior bank of gyrus	39593	96	67	90
4233	18	1021	CX	CgGp-s	Cingulate gyrus, parietal part, Right, superior bank of gyrus	39596	87	66	99
4234	18	1013	CX	CgGp-i	Cingulate gyrus, parietal part, Right, inferior bank of gyrus	39595	92	68	95
9222	18	1037	CX	cc	corpus callosum	81146	100	71	95
9241	18	1029	CX	cgb	cingulum bundle, Left	81148	109	58	90
9242	18	1053	CX	cgb	cingulum bundle, Right	81149	79	61	96
9222	18	1045	CX	cc	corpus callosum	81146	100	71	95
4224	10	410	CX	CgGf-i	Cingulate gyrus, frontal part, Left, inferior bank of gyrus	28221	94	75	53
4226	10	418	CX	CgGf-s	Cingulate gyrus, frontal part, Right, superior bank of gyrus	28220	86	76	49
4049	10	427	CX	GRe	gyrus rectus, Right	28188	84	107	57
4052	10	419	CX	MOrG	medial orbital gyrus, Right	28189	79	105	57
4031	10	450	CX	MFG-i	middle frontal gyrus, Left, inferior bank of gyrus	28162	138	67	55
4039	10	458	CX	trIFG	Inferior frontal gyrus, triangular part, Left	28161	146	88	61
4045	10	434	CX	orIFG	inferior frontal gyrus, orbital part, Left	28154	139	94	60
4079	10	442	CX	fro	frontal operculum, Left	28152	137	89	57
4273	10	426	CX	SIG	Short Insular Gyri, Left	28153	127	84	57
4024	10	465	CX	SFG-l	superior frontal gyrus, Left, lateral bank of gyrus	28130	119	42	52
4030	10	473	CX	MFG-s	middle frontal gyrus, Left, superior bank of gyrus	28129	124	58	52
4027	10	417	CX	SFG-l	superior frontal gyrus, Right, lateral bank of gyrus	41160	75	54	51
4033	10	409	CX	MFG-s	middle frontal gyrus, Right, superior bank of gyrus	28109	67	50	53
4034	10	433	CX	MFG-i	middle frontal gyrus, Right, inferior bank of gyrus	36703	44	63	55
4058	10	403	CX	POrG	posterior orbital gyrus, Right	32231	73	107	59
4908	10	411	CX	TP-m	temporal pole, Right, medial aspect	32232	70	115	61
4906	10	474	CX	TP-s	temporal pole, Right, superior aspect	36300	54	102	62
4907	10	387	CX	TP-i	temporal pole, Right, inferior aspect	41168	45	122	65
4903	10	451	CX	TP-s	temporal pole, Left, superior aspect	28194	138	99	62
4904	10	459	CX	TP-i	temporal pole, Left, inferior aspect	28195	133	123	62
4905	10	443	CX	TP-m	temporal pole, Left, medial aspect	36301	118	119	62
4026	10	441	CX	SFG-m	superior frontal gyrus, Right, medial bank of gyrus	28120	82	60	47
4226	10	457	CX	CgGf-s	Cingulate gyrus, frontal part, Right, superior bank of gyrus	28119	84	64	45
4274	10	394	CX	SIG	Short Insular Gyri, Right	36313	63	82	57
4089	24	469	CX	PoG-il	post central gyrus, Left, inferior lateral aspect of gyrus	35597	138	49	123
4090	24	477	CX	PoG-pcs	post central gyrus, Left, bank of the posterior central sulcus	35595	126	59	123
4106	24	390	CX	SMG-s	supramarginal gyrus, Left, superior bank of gyrus	35596	136	61	125
4142	24	506	CX	MTG-s	middle temporal gyrus, Left, superior bank of gyrus	35869	145	91	133
4143	24	498	CX	MTG-i	middle temporal gyrus, Left, inferior bank of gyrus	39692	140	105	133
4151	24	490	CX	ITG-mts	inferior temporal gyrus, Left, bank of mts	35871	132	102	133
4107	24	482	CX	SMG-i	supramarginal gyrus, Left, inferior bank of gyrus	35861	148	78	133
4149	24	569	CX	ITG-its	inferior temporal gyrus, Left, bank of the its	35846	130	109	133
4196	24	521	CX	LiG-pest	lingual gyrus, Right, peristriate	35843	87	102	129
4197	24	513	CX	LiG-str	lingual gyrus, Right, striate	35844	64	101	131
4203	24	537	CX	OTG-s	occipito-temporal gyrus, Right, superior bank of gyrus	35850	66	109	136
4204	24	545	CX	OTG-i	occipito-temporal gyrus, Right, inferior bank of gyrus	35849	73	115	136
4139	24	406	CX	STG-i	superior temporal gyrus, Right, inferior bank of gyrus	35832	39	112	134
4145	24	414	CX	MTG-s	middle temporal gyrus, Right, superior bank of gyrus	35829	57	116	137
4146	24	422	CX	MTG-i	middle temporal gyrus, Right, inferior bank of gyrus	35828	62	117	137
4271	24	398	CX	LIG	Long Insular Gyri, Right	35831	45	83	132
4074	24	437	CX	PCLa-i	paracentral lobule, anterior part, Left, inferior bank of gyrus	35039	109	62	117
4123	24	453	CX	Pcu-s	precuneus, Right, superior lateral bank of gyrus	35042	87	87	126
4124	24	461	CX	Pcu-i	precuneus, Right, inferior lateral bank of gyrus	35043	83	92	128
4234	24	445	CX	CgGp-i	Cingulate gyrus, parietal part, Right, inferior bank of gyrus	35041	84	76	125
4013	24	389	CX	PrG-sl	precentral gyrus, Left, superior lateral aspect of gyrus	35024	111	29	113
4014	24	405	CX	PrG-il	precentral gyrus, Left, inferior lateral aspect of gyrus	35025	119	45	116
4015	24	397	CX	PrG-cs	precentral gyrus, Left, bank of the central sulcus	35026	113	43	113
4087	24	413	CX	PoG-cs	post central gyrus, Left, bank of the central sulcus	35027	126	40	118
4088	24	421	CX	PoG-sl	post central gyrus, Left, superior lateral aspect of gyrus	35028	130	35	118
4018	24	444	CX	PrG-sl	precentral gyrus, Right, superior lateral aspect of gyrus	35010	85	30	123
4020	24	436	CX	PrG-cs	precentral gyrus, Right, bank of the central sulcus	35015	81	36	124
4076	24	452	CX	PCLa-s	paracentral lobule, anterior part, Right, superior bank of gyrus	35011	91	37	119
4077	24	468	CX	PCLa-i	paracentral lobule, anterior part, Right, inferior bank of gyrus	35012	92	49	120
4093	24	420	CX	PoG-sl	post central gyrus, Right, superior lateral aspect of gyrus	35009	68	33	126
4233	24	476	CX	CgGp-s	Cingulate gyrus, parietal part, Right, superior bank of gyrus	35013	82	63	123
4095	24	396	CX	PoG-pcs	post central gyrus, Right, bank of the posterior central sulcus	34998	55	58	128
4110	24	475	CX	SMG-i	supramarginal gyrus, Right, inferior bank of gyrus	35001	43	62	130
4109	24	388	CX	SMG-s	supramarginal gyrus, Right, superior bank of gyrus	34999	50	59	128
4049	6	481	CX	GRe	gyrus rectus, Right	27842	86	105	37
4121	26	401	CX	Pcu-i	precuneus, Left, , inferior lateral bank of gyrus	36851	96	64	134
4051	4	385	CX	MOrG	medial orbital gyrus, Left	27166	105	98	25
4073	24	460	CX	PCLa-s	paracentral lobule, anterior part, Left, superior bank of gyrus	35014	94	30	116
4023	10	449	CX	SFG-m	superior frontal gyrus, Left, medial bank of gyrus	28117	97	39	52
4120	24	429	CX	Pcu-s	precuneus, Left, , superior lateral bank of gyrus	35040	95	68	119
4193	24	529	CX	LiG-pest	lingual gyrus, Left, peristriate	35848	115	105	131
4201	24	561	CX	OTG-i	occipito-temporal gyrus, Left, inferior bank of gyrus	35845	131	114	133
4194	26	497	CX	LiG-str	lingual gyrus, Left, striate	36908	98	94	138
4194	26	306	CX	LiG-str	lingual gyrus, Left, striate	36908	98	94	138
4116	26	489	CX	AnG-s	angular gyrus, Right, superior bank of gyrus	36892	50	63	141
4024	6	393	CX	SFG-l	superior frontal gyrus, Left, lateral bank of gyrus	27725	119	55	42
4049	10	435	CX	GRe	gyrus rectus, Right	28188	84	107	57
4907	10	395	CX	TP-i	temporal pole, Right, inferior aspect	41168	45	122	65
4905	10	467	CX	TP-m	temporal pole, Left, medial aspect	36301	118	119	62
4027	10	425	CX	SFG-l	superior frontal gyrus, Right, lateral bank of gyrus	41163	74	57	52
4046	10	402	CX	orIFG	inferior frontal gyrus, orbital part, Right	39797	43	91	58
4039	10	466	CX	trIFG	Inferior frontal gyrus, triangular part, Left	41166	143	90	61
4109	24	412	CX	SMG-s	supramarginal gyrus, Right, superior bank of gyrus	39688	53	60	129
4146	24	505	CX	MTG-i	middle temporal gyrus, Right, inferior bank of gyrus	39690	63	118	137
4143	24	514	CX	MTG-i	middle temporal gyrus, Left, inferior bank of gyrus	39693	143	107	133
4033	12	530	CX	MFG-s	middle frontal gyrus, Right, superior bank of gyrus	36710	67	48	61
4034	12	522	CX	MFG-i	middle frontal gyrus, Right, inferior bank of gyrus	36711	47	66	64
4027	4	289	CX	SFG-l	superior frontal gyrus, Right, lateral bank of gyrus	27250	68	74	27
4031	8	371	CX	MFG-i	middle frontal gyrus, Left, inferior bank of gyrus	27932	134	68	45
4039	8	363	CX	trIFG	Inferior frontal gyrus, triangular part, Left	27931	134	86	45
4060	8	355	CX	LOrG	lateral orbital gyrus, Left	27939	124	95	45
4049	8	339	CX	GRe	gyrus rectus, Right	27944	85	107	45
4052	8	331	CX	MOrG	medial orbital gyrus, Right	27943	81	106	45
4227	8	315	CX	CgGf-i	Cingulate gyrus, frontal part, Right, inferior bank of gyrus	27945	88	99	46
4040	8	291	CX	trIFG	Inferior frontal gyrus, triangular part, Right	28103	45	94	48
4046	8	307	CX	orIFG	inferior frontal gyrus, orbital part, Right	27961	59	98	48
4907	8	299	CX	TP-i	temporal pole, Right, inferior aspect	27959	55	114	47
4024	8	378	CX	SFG-l	superior frontal gyrus, Left, lateral bank of gyrus	27925	115	51	49
4026	8	354	CX	SFG-m	superior frontal gyrus, Right, medial bank of gyrus	27968	87	57	45
4027	8	338	CX	SFG-l	superior frontal gyrus, Right, lateral bank of gyrus	27916	73	62	37
4196	26	314	CX	LiG-pest	lingual gyrus, Right, peristriate	36907	85	100	139
4121	26	361	CX	Pcu-i	precuneus, Left, , inferior lateral bank of gyrus	36851	96	64	134
4131	26	353	CX	PCLp-cs	paracentral lobule, posterior part, Right, bank of cingulate sulcus	36850	82	63	136
4186	28	305	CX	Cun-pest	cuneus, Left, peristriate	27487	94	86	146
4048	8	347	CX	GRe	gyrus rectus, Left	27947	102	106	46
4224	8	323	CX	CgGf-i	Cingulate gyrus, frontal part, Left, inferior bank of gyrus	27946	101	92	42
4023	8	370	CX	SFG-m	superior frontal gyrus, Left, medial bank of gyrus	28050	94	55	46
4193	26	322	CX	LiG-pest	lingual gyrus, Left, peristriate	36909	98	106	139
4116	26	321	CX	AnG-s	angular gyrus, Right, superior bank of gyrus	36892	50	63	141
4117	26	313	CX	AnG-i	angular gyrus, Right, inferior bank of gyrus	36893	39	74	143
4033	4	297	CX	MFG-s	middle frontal gyrus, Right, superior bank of gyrus	27251	67	82	28
4026	8	346	CX	SFG-m	superior frontal gyrus, Right, medial bank of gyrus	27968	87	57	45
4073	26	345	CX	PCLa-s	paracentral lobule, anterior part, Left, superior bank of gyrus	36827	98	47	129
4130	26	329	CX	PCLp-l	paracentral lobule, posterior part, Right, lateral bank of gyrus	36825	84	33	139
4130	26	337	CX	PCLp-l	paracentral lobule, posterior part, Right, lateral bank of gyrus	36825	84	33	139
4149	22	659	CX	ITG-its	inferior temporal gyrus, Left, bank of the its	37562	144	113	122
4203	22	580	CX	OTG-s	occipito-temporal gyrus, Right, superior bank of gyrus	37565	72	109	126
4201	22	667	CX	OTG-i	occipito-temporal gyrus, Left, inferior bank of gyrus	37564	137	116	122
4153	22	635	CX	ITG-its	inferior temporal gyrus, Right, bank of the its	37547	40	111	124
4204	22	651	CX	OTG-i	occipito-temporal gyrus, Right, inferior bank of gyrus	37546	52	116	126
4138	22	619	CX	STG-l	superior temporal gyrus, Right, lateral bank of gyrus	37527	29	61	119
4145	22	603	CX	MTG-s	middle temporal gyrus, Right, superior bank of gyrus	37526	30	77	119
4146	22	595	CX	MTG-i	middle temporal gyrus, Right, inferior bank of gyrus	37525	30	92	120
4154	22	627	CX	ITG-l	inferior temporal gyrus, Right, lateral bank of gyrus	37523	29	99	123
4155	22	587	CX	ITG-mts	inferior temporal gyrus, Right, bank of mts	37524	47	91	121
4089	22	642	CX	PoG-il	post central gyrus, Left, inferior lateral aspect of gyrus	38602	147	46	112
4090	22	650	CX	PoG-pcs	post central gyrus, Left, bank of the posterior central sulcus	38601	142	50	114
4106	22	658	CX	SMG-s	supramarginal gyrus, Left, superior bank of gyrus	38600	144	55	117
4107	22	666	CX	SMG-i	supramarginal gyrus, Left, inferior bank of gyrus	38604	153	74	119
4013	22	602	CX	PrG-sl	precentral gyrus, Left, superior lateral aspect of gyrus	37490	113	34	107
4014	22	610	CX	PrG-il	precentral gyrus, Left, inferior lateral aspect of gyrus	37489	127	35	111
4015	22	626	CX	PrG-cs	precentral gyrus, Left, bank of the central sulcus	37488	128	47	111
4087	22	634	CX	PoG-cs	post central gyrus, Left, bank of the central sulcus	37487	132	46	112
4088	22	618	CX	PoG-sl	post central gyrus, Left, superior lateral aspect of gyrus	37479	136	38	112
4076	22	665	CX	PCLa-s	paracentral lobule, anterior part, Right, superior bank of gyrus	37467	84	26	111
4077	22	594	CX	PCLa-i	paracentral lobule, anterior part, Right, inferior bank of gyrus	37470	87	52	116
4018	22	649	CX	PrG-sl	precentral gyrus, Right, superior lateral aspect of gyrus	37461	71	30	113
4019	22	657	CX	PrG-il	precentral gyrus, Right, inferior lateral aspect of gyrus	37460	62	35	115
4020	22	641	CX	PrG-cs	precentral gyrus, Right, bank of the central sulcus	37459	62	49	117
4092	22	633	CX	PoG-cs	post central gyrus, Right, bank of the central sulcus	37458	58	49	117
4093	22	625	CX	PoG-sl	post central gyrus, Right, superior lateral aspect of gyrus	37457	54	38	117
4094	22	609	CX	PoG-il	post central gyrus, Right, inferior lateral aspect of gyrus	36927	46	42	117
4095	22	617	CX	PoG-pcs	post central gyrus, Right, bank of the posterior central sulcus	36926	54	54	118
4110	22	601	CX	SMG-i	supramarginal gyrus, Right, inferior bank of gyrus	36928	42	51	118
4061	4	585	CX	LOrG	lateral orbital gyrus, Right	27254	60	91	29
4197	28	577	CX	LiG-str	lingual gyrus, Right, striate	27489	80	98	147
4069	12	565	CX	PaOG	parolfactory gyri, Left	38511	103	106	65
4143	12	564	CX	MTG-i	middle temporal gyrus, Left, inferior bank of gyrus	36796	140	119	71
4151	12	572	CX	ITG-mts	inferior temporal gyrus, Left, bank of mts	36801	137	123	71
4158	12	485	CX	FuG-its	fusiform gyrus, Left, bank of the its	36800	124	124	71
4159	12	493	CX	FuG-l	fusiform gyrus, Left, lateral bank of gyrus	36799	118	128	71
4160	12	501	CX	FuG-cos	fusiform gyrus, Left, bank of cos	36798	119	122	71
4245	12	509	CX	PHG-cos	parahippocampal gyrus, Left, bank of the cos	36797	117	120	71
4031	12	593	CX	MFG-i	middle frontal gyrus, Left, inferior bank of gyrus	36737	145	67	65
4031	12	491	CX	MFG-i	middle frontal gyrus, Left, inferior bank of gyrus	36737	145	67	65
4023	12	570	CX	SFG-m	superior frontal gyrus, Left, medial bank of gyrus	36726	94	62	57
4024	12	562	CX	SFG-l	superior frontal gyrus, Left, lateral bank of gyrus	36725	108	37	59
4223	12	483	CX	CgGf-s	Cingulate gyrus, frontal part, Left, superior bank of gyrus	36727	100	70	58
4064	12	517	CX	SCG	subcollosal gyrus, Right	39630	92	95	67
4070	12	525	CX	PaOG	parolfactory gyri, Right	39631	89	109	69
4284	12	549	CX	HCd	Head of Caudate Nucleus, Right	81050	83	87	66
4289	12	533	CX	Pu	Putamen, Right	81049	76	92	66
4135	12	532	CX	STG-l	superior temporal gyrus, Left, lateral bank of gyrus	36785	151	92	71
4136	12	540	CX	STG-i	superior temporal gyrus, Left, inferior bank of gyrus	36784	139	108	71
4142	12	548	CX	MTG-s	middle temporal gyrus, Left, superior bank of gyrus	36783	142	110	71
4178	12	524	CX	PLP	planum polare, Left	36787	144	93	71
4042	12	539	CX	opIFG	inferior frontal gyrus, opercular part, Left	36756	145	75	66
4073	22	578	CX	PCLa-s	paracentral lobule, anterior part, Left, superior bank of gyrus	37468	96	35	105
4074	22	586	CX	PCLa-i	paracentral lobule, anterior part, Left, inferior bank of gyrus	37469	98	51	106
4200	22	588	CX	OTG-s	occipito-temporal gyrus, Left, superior bank of gyrus	37566	95	99	121
4043	12	507	CX	opIFG	inferior frontal gyrus, opercular part, Right	36745	36	80	68
4080	12	523	CX	fro	frontal operculum, Right	36743	51	89	68
4138	12	499	CX	STG-l	superior temporal gyrus, Right, lateral bank of gyrus	36741	36	97	72
4167	12	515	CX	HG	Heschel's gyrus, Right	36744	49	95	69
4274	12	531	CX	SIG	Short Insular Gyri, Right	36742	58	89	67
4226	12	518	CX	CgGf-s	Cingulate gyrus, frontal part, Right, superior bank of gyrus	247253	85	70	55
4145	12	508	CX	MTG-s	middle temporal gyrus, Right, superior bank of gyrus	36777	40	106	73
4146	12	500	CX	MTG-i	middle temporal gyrus, Right, inferior bank of gyrus	36775	47	115	75
4153	12	484	CX	ITG-its	inferior temporal gyrus, Right, bank of the its	36773	59	127	75
4154	12	492	CX	ITG-l	inferior temporal gyrus, Right, lateral bank of gyrus	36774	49	130	75
4162	12	571	CX	FuG-its	fusiform gyrus, Right, bank of the its	36772	62	125	75
4163	12	563	CX	FuG-l	fusiform gyrus, Right, lateral bank of gyrus	36770	67	128	75
4164	12	555	CX	FuG-cos	fusiform gyrus, Right, bank of cos	36768	67	123	75
4248	12	547	CX	PHG-cos	parahippocampal gyrus, Right, bank of the cos	36767	69	120	74
4079	12	573	CX	fro	frontal operculum, Left	278277	125	79	68
4280	12	502	CX	HCd	Head of Caudate Nucleus, Left	39165	107	78	66
4288	12	486	CX	Pu	Putamen, Left	39166	114	89	66
4288	12	494	CX	Pu	Putamen, Left	39166	114	89	66
4146	12	516	CX	MTG-i	middle temporal gyrus, Right, inferior bank of gyrus	36778	44	115	75
4142	12	556	CX	MTG-s	middle temporal gyrus, Left, superior bank of gyrus	36792	143	107	71
4289	12	541	CX	Pu	Putamen, Right	81045	76	92	66
4107	22	579	CX	SMG-i	supramarginal gyrus, Left, inferior bank of gyrus	38603	154	74	119
4145	22	611	CX	MTG-s	middle temporal gyrus, Right, superior bank of gyrus	37531	34	78	120
4153	22	643	CX	ITG-its	inferior temporal gyrus, Right, bank of the its	37551	42	109	124
4284	12	557	CX	HCd	Head of Caudate Nucleus, Right	81046	83	87	66
4280	12	510	CX	HCd	Head of Caudate Nucleus, Left	278279	107	78	66
4026	12	554	CX	SFG-m	superior frontal gyrus, Right, medial bank of gyrus	36718	91	63	54
4027	12	546	CX	SFG-l	superior frontal gyrus, Right, lateral bank of gyrus	36717	70	51	61
4026	12	538	CX	SFG-m	superior frontal gyrus, Right, medial bank of gyrus	36721	91	60	54
4231	20	685	CX	CgGp-i	Cingulate gyrus, parietal part, Left, inferior bank of gyrus	39430	94	68	101
4143	20	677	CX	MTG-i	middle temporal gyrus, Left, inferior bank of gyrus	38466	148	102	116
4149	20	748	CX	ITG-its	inferior temporal gyrus, Left, bank of the its	38464	135	110	114
4151	20	756	CX	ITG-mts	inferior temporal gyrus, Left, bank of mts	38465	145	105	116
4160	20	716	CX	FuG-cos	fusiform gyrus, Left, bank of cos	37657	123	111	109
4153	20	755	CX	ITG-its	inferior temporal gyrus, Right, bank of the its	37645	48	116	121
4154	20	747	CX	ITG-l	inferior temporal gyrus, Right, lateral bank of gyrus	37642	36	118	121
4162	20	676	CX	FuG-its	fusiform gyrus, Right, bank of the its	37644	54	115	120
4163	20	684	CX	FuG-l	fusiform gyrus, Right, lateral bank of gyrus	37646	66	114	117
4247	20	708	CX	PHG-l	parahippocampal gyrus, Right, lateral bank of gyrus	37649	76	107	112
4248	20	700	CX	PHG-cos	parahippocampal gyrus, Right, bank of the cos	37648	64	109	115
4107	20	691	CX	SMG-i	supramarginal gyrus, Left, inferior bank of gyrus	37636	147	79	114
4136	20	723	CX	STG-i	superior temporal gyrus, Left, inferior bank of gyrus	37628	145	87	114
4169	20	739	CX	TG	transverse gyri, Left	37630	125	80	115
4172	20	731	CX	PLT	planum temporale, Left	37629	135	83	115
4145	20	683	CX	MTG-s	middle temporal gyrus, Right, superior bank of gyrus	37620	32	101	118
4146	20	675	CX	MTG-i	middle temporal gyrus, Right, inferior bank of gyrus	37619	37	106	119
4155	20	762	CX	ITG-mts	inferior temporal gyrus, Right, bank of mts	37614	39	108	120
4014	20	754	CX	PrG-il	precentral gyrus, Left, inferior lateral aspect of gyrus	39438	131	37	103
4015	20	746	CX	PrG-cs	precentral gyrus, Left, bank of the central sulcus	37604	127	55	103
4087	20	738	CX	PoG-cs	post central gyrus, Left, bank of the central sulcus	37603	129	57	104
4090	20	730	CX	PoG-pcs	post central gyrus, Left, bank of the posterior central sulcus	37602	139	63	109
4106	20	722	CX	SMG-s	supramarginal gyrus, Left, superior bank of gyrus	37601	143	64	111
4018	20	753	CX	PrG-sl	precentral gyrus, Right, superior lateral aspect of gyrus	37268	81	29	107
4076	20	761	CX	PCLa-s	paracentral lobule, anterior part, Right, superior bank of gyrus	37269	88	29	109
4074	20	706	CX	PCLa-i	paracentral lobule, anterior part, Left, inferior bank of gyrus	37274	105	58	100
4233	20	690	CX	CgGp-s	Cingulate gyrus, parietal part, Right, superior bank of gyrus	37272	87	60	109
4019	20	745	CX	PrG-il	precentral gyrus, Right, inferior lateral aspect of gyrus	37218	64	50	110
4020	20	737	CX	PrG-cs	precentral gyrus, Right, bank of the central sulcus	37217	57	36	110
4093	20	729	CX	PoG-sl	post central gyrus, Right, superior lateral aspect of gyrus	37216	44	44	111
4094	20	721	CX	PoG-il	post central gyrus, Right, inferior lateral aspect of gyrus	37214	40	47	111
4109	20	697	CX	SMG-s	supramarginal gyrus, Right, superior bank of gyrus	37202	34	54	112
4110	20	705	CX	SMG-i	supramarginal gyrus, Right, inferior bank of gyrus	37203	34	80	115
4114	30	673	CX	AnG-i	angular gyrus, Left, inferior bank of gyrus	27902	126	82	161
4099	28	681	CX	SPL-i	supraparietal lobule, Left, inferior bank of gyrus	27323	125	61	146
4073	20	674	CX	PCLa-s	paracentral lobule, anterior part, Left, superior bank of gyrus	37270	96	29	99
4230	20	698	CX	CgGp-s	Cingulate gyrus, parietal part, Left, superior bank of gyrus	37273	98	61	99
4154	12	689	CX	ITG-l	inferior temporal gyrus, Right, lateral bank of gyrus	36774	49	130	75
4110	20	713	CX	SMG-i	supramarginal gyrus, Right, inferior bank of gyrus	37208	36	83	115
4142	20	715	CX	MTG-s	middle temporal gyrus, Left, superior bank of gyrus	37637	145	91	114
4107	20	699	CX	SMG-i	supramarginal gyrus, Left, inferior bank of gyrus	37626	150	78	114
4153	20	763	CX	ITG-its	inferior temporal gyrus, Right, bank of the its	37643	50	112	121
4077	20	682	CX	PCLa-i	paracentral lobule, anterior part, Right, inferior bank of gyrus	37271	80	61	107
4135	22	604	CX	STG-l	superior temporal gyrus, Left, lateral bank of gyrus	37586	155	85	120
4136	22	612	CX	STG-i	superior temporal gyrus, Left, inferior bank of gyrus	37585	134	90	121
4142	22	620	CX	MTG-s	middle temporal gyrus, Left, superior bank of gyrus	37584	136	93	121
4143	22	628	CX	MTG-i	middle temporal gyrus, Left, inferior bank of gyrus	37582	147	97	121
4150	22	644	CX	ITG-l	inferior temporal gyrus, Left, lateral bank of gyrus	37583	144	108	122
4166	22	596	CX	HG	Heschel's gyrus, Left	37588	151	80	120
4172	22	652	CX	PLT	planum temporale, Left	37587	155	81	120
4143	22	636	CX	MTG-i	middle temporal gyrus, Left, inferior bank of gyrus	37596	145	98	121
4234	24	769	CX	CgGp-i	Cingulate gyrus, parietal part, Right, inferior bank of gyrus	35041	84	76	125
4093	22	785	CX	PoG-sl	post central gyrus, Right, superior lateral aspect of gyrus	37457	54	38	117
4139	26	369	CX	STG-i	superior temporal gyrus, Right, inferior bank of gyrus	27986	56	98	146
4245	12	777	CX	PHG-cos	parahippocampal gyrus, Left, bank of the cos	36797	117	120	71
4023	14	817	CX	SFG-m	superior frontal gyrus, Left, medial bank of gyrus	38672	94	49	63
4026	14	809	CX	SFG-m	superior frontal gyrus, Right, medial bank of gyrus	38671	90	39	65
4024	14	833	CX	SFG-l	superior frontal gyrus, Left, lateral bank of gyrus	38681	107	41	64
4138	14	850	CX	STG-l	superior temporal gyrus, Right, lateral bank of gyrus	38831	31	91	82
4139	14	842	CX	STG-i	superior temporal gyrus, Right, inferior bank of gyrus	38830	39	98	83
4145	14	834	CX	MTG-s	middle temporal gyrus, Right, superior bank of gyrus	38829	36	102	84
4146	14	826	CX	MTG-i	middle temporal gyrus, Right, inferior bank of gyrus	38828	40	112	86
4155	14	810	CX	ITG-mts	inferior temporal gyrus, Right, bank of mts	38827	40	115	86
4136	14	811	CX	STG-i	superior temporal gyrus, Left, inferior bank of gyrus	38864	139	101	83
4142	14	803	CX	MTG-s	middle temporal gyrus, Left, superior bank of gyrus	38863	146	104	83
4143	14	795	CX	MTG-i	middle temporal gyrus, Left, inferior bank of gyrus	38862	142	111	83
4150	14	858	CX	ITG-l	inferior temporal gyrus, Left, lateral bank of gyrus	38860	135	125	83
4151	14	779	CX	ITG-mts	inferior temporal gyrus, Left, bank of mts	38861	141	114	83
4149	14	844	CX	ITG-its	inferior temporal gyrus, Left, bank of the its	39146	132	117	83
4158	14	852	CX	FuG-its	fusiform gyrus, Left, bank of the its	39147	129	123	83
4159	14	789	CX	FuG-l	fusiform gyrus, Left, lateral bank of gyrus	39148	125	126	83
4160	14	860	CX	FuG-cos	fusiform gyrus, Left, bank of cos	39149	121	119	83
4244	14	781	CX	PHG-l	parahippocampal gyrus, Left, lateral bank of gyrus	39151	105	119	84
4245	14	773	CX	PHG-cos	parahippocampal gyrus, Left, bank of the cos	39150	118	118	83
4031	14	841	CX	MFG-i	middle frontal gyrus, Left, inferior bank of gyrus	38697	128	56	71
4080	14	819	CX	fro	frontal operculum, Right	38874	60	77	79
4289	14	827	CX	Pu	Putamen, Right	38875	69	85	84
4280	14	851	CX	HCd	Head of Caudate Nucleus, Left	247257	109	78	81
4284	14	835	CX	HCd	Head of Caudate Nucleus, Right	39085	79	79	81
4079	14	859	CX	fro	frontal operculum, Left	39232	129	78	81
4273	14	772	CX	SIG	Short Insular Gyri, Left	39234	125	79	82
4288	14	780	CX	Pu	Putamen, Left	39235	117	85	83
4033	14	801	CX	MFG-s	middle frontal gyrus, Right, superior bank of gyrus	38663	78	38	65
4043	14	786	CX	opIFG	inferior frontal gyrus, opercular part, Right	38718	34	76	78
4167	14	770	CX	HG	Heschel's gyrus, Right	38715	44	90	81
4170	14	849	CX	TG	transverse gyri, Right	38714	50	101	84
4173	14	778	CX	PLT	planum temporale, Right	38717	34	91	82
4274	14	857	CX	SIG	Short Insular Gyri, Right	38716	53	87	81
4149	14	828	CX	ITG-its	inferior temporal gyrus, Left, bank of the its	278610	53	116	87
4162	14	820	CX	FuG-its	fusiform gyrus, Right, bank of the its	39138	55	120	87
4163	14	836	CX	FuG-l	fusiform gyrus, Right, lateral bank of gyrus	39134	60	125	87
4164	14	812	CX	FuG-cos	fusiform gyrus, Right, bank of cos	39135	64	120	87
4247	14	796	CX	PHG-l	parahippocampal gyrus, Right, lateral bank of gyrus	39137	74	118	87
4248	14	804	CX	PHG-cos	parahippocampal gyrus, Right, bank of the cos	39136	68	119	87
4024	14	825	CX	SFG-l	superior frontal gyrus, Left, lateral bank of gyrus	38684	105	44	64
4155	14	802	CX	ITG-mts	inferior temporal gyrus, Right, bank of mts	38832	44	115	86
4146	14	818	CX	MTG-i	middle temporal gyrus, Right, inferior bank of gyrus	38833	44	112	86
4151	14	771	CX	ITG-mts	inferior temporal gyrus, Left, bank of mts	38868	144	115	83
4143	14	787	CX	MTG-i	middle temporal gyrus, Left, inferior bank of gyrus	38869	145	112	83
4284	14	843	CX	HCd	Head of Caudate Nucleus, Right	39080	79	79	81
4288	14	788	CX	Pu	Putamen, Left	39237	117	85	83
4722	67	1129	CB	PV-VI	VI, Left Paravermis	56041	98	120	139
4280	13	1225	CX	HCd	Head of Caudate Nucleus, Left	73304	104	83	71
4288	13	1233	CX	Pu	Putamen, Left	73305	113	91	69
4291	13	1241	CX	Acb	Nucleus Accumbens, Left	73303	100	96	70
4284	13	1209	CX	HCd	Head of Caudate Nucleus, Right	41669	80	78	71
4289	13	1217	CX	Pu	Putamen, Right	41668	74	90	70
4280	19	1234	CX	HCd	Head of Caudate Nucleus, Left	73376	110	74	104
4284	19	1226	CX	HCd	Head of Caudate Nucleus, Right	73256	76	77	108
4113	26	1235	CX	AnG-s	angular gyrus, Left, superior bank of gyrus	82236	145	62	143
4172	26	1243	CX	PLT	planum temporale, Left	82235	135	71	143
4751	71	1100	CB	PV-III	III, Right Paravermis	65130	81	119	109
4076	24	1153	CX	PCLa-s	paracentral lobule, anterior part, Right, superior bank of gyrus	35011	91	37	119
4088	22	1161	CX	PoG-sl	post central gyrus, Left, superior lateral aspect of gyrus	37479	136	38	112
4771	78	1130	CB	He-VI	VI, Right Lateral Hemisphere	56087	57	127	137
4772	78	1122	CB	He-Crus I	Crus I, Right Lateral Hemisphere	56086	57	138	141
4773	78	1114	CB	He-Crus II	Crus II, Right Lateral Hemisphere	56085	57	147	131
4774	78	1106	CB	He-VIIB	VIIB, Right Lateral Hemisphere	56084	57	148	123
4775	78	1098	CB	He-VIIIA	VIIIA, Right Lateral Hemisphere	56083	57	148	119
4280	11	1193	CX	HCd	Head of Caudate Nucleus, Left	41619	107	87	62
4288	11	1201	CX	Pu	Putamen, Left	41620	115	93	62
4284	11	1177	CX	HCd	Head of Caudate Nucleus, Right	41607	80	85	62
4289	11	1185	CX	Pu	Putamen, Right	41606	75	91	61
4700	68	1123	CB	Ve-I-II	I-II	64814	94	115	114
4701	68	1115	CB	Ve-III	III	64815	94	118	118
4711	68	1131	CB	Ve-IX	IX	64813	95	113	111
4701	68	1107	CB	Ve-III	III	64786	93	113	114
4702	68	1099	CB	Ve-IV	IV	64785	93	110	120
4703	68	1091	CB	Ve-V	V	64784	93	114	132
4705	68	1059	CB	Ve-VI	VI	64940	93	124	141
4706	68	1146	CB	Ve-VIIAf	VIIAf	64939	93	123	143
4707	68	1138	CB	Ve-VIIAt	VIIAt	64944	93	128	145
4708	68	1067	CB	Ve-VIIB	VIIB	64941	93	128	131
4709	68	1083	CB	Ve-VIIIA	VIIIA	64943	95	134	116
4710	68	1075	CB	Ve-VIIIB	VIIIB	64942	94	130	122
4752	71	1092	CB	PV-IV	IV, Right Paravermis	65131	80	113	111
4753	71	1084	CB	PV-V	V, Right Paravermis	65129	80	113	119
4760	71	1116	CB	PV-VIIIB	VIIIB, Right Paravermis	65133	83	157	117
4761	71	1108	CB	PV-IX	IX, Right Paravermis	65132	83	138	113
4755	71	1076	CB	PV-VI	VI, Right Paravermis	65134	80	117	134
4756	71	1068	CB	PV-Crus I	Crus I, Right Paravermis	65135	80	127	143
4757	71	1060	CB	PV-Crus II	Crus II, Right Paravermis	65136	81	141	142
4758	71	1147	CB	PV-VIIB	VIIB, Right Paravermis	65137	82	141	136
4759	71	1139	CB	PV-VIIIA	VIIIA, Right Paravermis	65164	83	150	128
4739	61	1097	CB	He-Crus I	Crus I, Left Lateral Hemisphere	51347	128	129	138
4740	61	1089	CB	He-Crus II	Crus II, Left Lateral Hemisphere	51349	129	142	132
4741	61	1081	CB	He-VIIB	VIIB, Left Lateral Hemisphere	51350	130	147	118
4738	61	1105	CB	He-VI	VI, Left Lateral Hemisphere	51346	126	123	122
4718	67	1090	CB	PV-III	III, Left Paravermis	51241	98	119	114
4719	67	1082	CB	PV-IV	IV, Left Paravermis	51239	98	105	126
4725	67	1074	CB	PV-VIIB	VIIB, Left Paravermis	56063	102	143	134
4726	67	1066	CB	PV-VIIIA	VIIIA, Left Paravermis	56062	102	145	128
4727	67	1058	CB	PV-VIIIB	VIIIB, Left Paravermis	56061	102	155	114
4728	67	1145	CB	PV-IX	IX, Left Paravermis	56059	102	145	103
4720	67	1137	CB	PV-V	V, Left Paravermis	56042	98	119	136
4723	67	1121	CB	PV-Crus I	Crus I, Left Paravermis	56040	98	127	142
4724	67	1113	CB	PV-Crus II	Crus II, Left Paravermis	56039	99	135	145
4092	18	1057	CX	PoG-cs	post central gyrus, Right, bank of the central sulcus	39332	47	57	100
4292	13	1154	CX	Acb	Nucleus Accumbens, Right	81073	83	96	70
4890	2	1195	CX	FP-s	frontal pole, Left, superior aspect	82233	70	86	19
4136	14	1065	CX	STG-i	superior temporal gyrus, Left, inferior bank of gyrus	38864	139	101	83
4284	15	1162	CX	HCd	Head of Caudate Nucleus, Right	41739	80	74	87
4289	15	1170	CX	Pu	Putamen, Right	41738	68	87	86
4298	15	1178	CX	GPe	globus pallidus, external segment, Right	41737	74	88	87
4288	15	1218	CX	Pu	Putamen, Left	49142	113	86	85
4280	17	1187	CX	HCd	Head of Caudate Nucleus, Left	41675	110	73	98
4288	17	1171	CX	Pu	Putamen, Left	41673	120	87	95
4295	17	1179	CX	GPe	globus pallidus, external segment, Left	41674	116	90	97
4280	15	1210	CX	HCd	Head of Caudate Nucleus, Left	38539	98	84	86
4295	15	1202	CX	GPe	globus pallidus, external segment, Left	38537	103	92	85
4296	15	1194	CX	GPi	globus pallidus, internal segment, Left	38538	104	95	85
4299	15	1186	CX	GPi	globus pallidus, internal segment, Right	38542	81	89	87
4284	17	1163	CX	HCd	Head of Caudate Nucleus, Right	692918	78	73	98
4146	14	1169	CX	MTG-i	middle temporal gyrus, Right, inferior bank of gyrus	38833	44	112	86
4098	28	1219	CX	SPL-s	supraparietal lobule, Left, superior bank of gyrus	82258	108	37	141
4289	17	1242	CX	Pu	Putamen, Right	41677	67	88	98
4298	17	1155	CX	GPe	globus pallidus, external segment, Right	863432	70	92	99
4210	28	1227	CX	IOG-s	inferior occipital gyrus, Right, superior bank of gyrus	863430	67	113	158
4210	30	1211	CX	IOG-s	inferior occipital gyrus, Right, superior bank of gyrus	82263	51	69	160
4211	30	1203	CX	IOG-i	inferior occipital gyrus, Right, inferior bank of gyrus	82264	57	70	161
4027	12	1073	CX	SFG-l	superior frontal gyrus, Right, lateral bank of gyrus	36717	70	51	61
4046	10	1257	CX	orIFG	inferior frontal gyrus, orbital part, Right	39796	41	89	58
4142	24	1265	CX	MTG-s	middle temporal gyrus, Left, superior bank of gyrus	35869	145	91	133
4244	20	1321	CX	PHG-l	parahippocampal gyrus, Left, lateral bank of gyrus	37659	104	106	112
4245	20	1313	CX	PHG-cos	parahippocampal gyrus, Left, bank of the cos	37658	119	108	109
4164	20	1305	CX	FuG-cos	fusiform gyrus, Right, bank of cos	37647	65	111	116
4142	20	1297	CX	MTG-s	middle temporal gyrus, Left, superior bank of gyrus	37627	147	90	114
4013	20	1289	CX	PrG-sl	precentral gyrus, Left, superior lateral aspect of gyrus	37577	117	31	99
4094	24	404	CX	PoG-il	post central gyrus, Right, inferior lateral aspect of gyrus	34997	55	47	128
4033	8	1249	CX	MFG-s	middle frontal gyrus, Right, superior bank of gyrus	27915	71	59	37
4200	24	553	CX	OTG-s	occipito-temporal gyrus, Left, superior bank of gyrus	35847	120	110	132
4790	70	2468	CB	Glo	Globose Nucleus, Right	73470	86	132	121
4151	20	1337	CX	ITG-mts	inferior temporal gyrus, Left, bank of mts	38473	147	106	116
4154	14	1258	CX	ITG-l	inferior temporal gyrus, Right, lateral bank of gyrus	38826	34	118	86
4034	14	793	CX	MFG-i	middle frontal gyrus, Right, inferior bank of gyrus	38658	67	55	71
4033	14	1250	CX	MFG-s	middle frontal gyrus, Right, superior bank of gyrus	38663	78	38	65
4299	15	1266	CX	GPi	globus pallidus, internal segment, Right	38542	81	89	87
4417	20	2553	CX	DTLv	Lateral group of Nuclei, Left, Ventral division	64577	116	90	108
4444	19	2556	CX	MG	Medial Geniculate Complex, Left	39969	114	99	104
4329	15	2450	CX	ATZ	Amygdaloid Transition zone, Left	73236	111	104	88
4135	22	1281	CX	STG-l	superior temporal gyrus, Left, lateral bank of gyrus	37586	155	85	120
4787	70	2452	CB	Dt	Dentate Nucleus, Right	73469	85	129	127
4788	70	2460	CB	Emb	Emboliform Nucleus, Right	73471	86	130	118
4255	17	2467	CX	CA2	CA2 field, Left	41209	121	104	100
4256	17	2475	CX	CA3	CA3 field, Left	41210	119	104	100
4257	17	2483	CX	CA4	CA4 field, Left	41208	118	105	100
4258	17	2491	CX	DG	Dentate gyrus, Left	41207	116	105	100
4251	18	2443	CX	S	subiculum, Left	65158	116	110	102
4254	18	2427	CX	CA1	CA1 field, Left	65159	125	106	102
4255	18	2469	CX	CA2	CA2 field, Left	65162	124	103	102
4256	18	2477	CX	CA3	CA3 field, Left	65161	123	103	102
4258	18	2485	CX	DG	Dentate gyrus, Left	40629	122	105	102
4281	18	2451	CX	TCd	Tail of Caudate Nucleus, Left	65163	127	103	102
4248	16	870	CX	PHG-cos	parahippocampal gyrus, Right, bank of the cos	39399	65	117	98
4251	20	2585	CX	S	subiculum, Left	56094	110	103	110
4254	20	2505	CX	CA1	CA1 field, Left	56093	122	104	109
4255	20	2513	CX	CA2	CA2 field, Left	56092	123	101	108
4256	20	2521	CX	CA3	CA3 field, Left	56091	121	101	109
4257	20	2529	CX	CA4	CA4 field, Left	56090	120	103	109
4258	20	2537	CX	DG	Dentate gyrus, Left	56089	119	103	109
4395	20	2497	CX	DTA	Anterior Group of Nuclei, Left	64568	103	83	107
4400	20	2561	CX	DTM	Medial Group of Nuclei, Left	64562	102	90	108
4409	20	2545	CX	DTLd	Lateral group of Nuclei, Left, Dorsal Division	64570	114	92	108
4428	20	2569	CX	DTP	Posterior Group of Nuclei, Left	81133	115	99	108
4432	20	2577	CX	ILr	Rostral Group of intralaminar Nuclei, Left	64569	104	89	108
9115	20	2498	CX	SC	Superior Colliculus, Left	247813	101	101	109
4251	16	2517	CX	S	subiculum, Left	82199	116	113	93
4254	16	2580	CX	CA1	CA1 field, Left	82198	123	108	93
4255	16	2581	CX	CA2	CA2 field, Left	82193	119	104	93
4256	16	2588	CX	CA3	CA3 field, Left	82196	120	107	93
4257	16	2501	CX	CA4	CA4 field, Left	82195	122	106	93
4258	16	2510	CX	DG	Dentate gyrus, Left	81178	121	106	93
4307	16	2525	CX	SI	Substantia Innominata, Left	82192	116	98	92
4360	16	2589	CX	CeA	Central Nucleus, Left	64846	117	99	93
4367	16	2502	CX	COMA	Cortico-medial group, Left	64848	115	99	93
4679	16	2509	CX	PHA	Posterior Hypothalamic Area, Left	67291	97	94	93
4301	14	2546	CX	SptN	Septal nuclei, Left	64823	96	91	83
4304	14	2554	CX	SptN	Septal nuclei, Right	247258	91	91	83
4307	14	2522	CX	SI	Substantia Innominata, Left	64824	101	96	83
4314	14	2530	CX	SI	Substantia Innominata, Right	64825	81	96	83
4542	14	2506	CX	PrOR	Preoptic Region, Left	394223	96	100	83
4556	14	2514	CX	PrOR	Preoptic Region, Right	394224	90	100	83
4593	14	2538	CX	SO	Supraoptic Nucleus, Left	394222	102	101	83
4624	14	2533	CX	SO	Supraoptic Nucleus, Right	394221	86	100	83
4251	19	2572	CX	S	subiculum, Left	39972	110	104	104
4255	19	2541	CX	CA2	CA2 field, Left	39939	124	105	104
4257	19	2557	CX	CA4	CA4 field, Left	39937	122	104	104
4258	19	2532	CX	DG	Dentate gyrus, Left	39936	121	103	103
4417	19	2540	CX	DTLv	Lateral group of Nuclei, Left, Ventral division	39970	112	96	104
4440	19	2548	CX	LGd	Dorsal Lateral Geniculate Nucleus, Left	39968	119	96	104
9004	19	2524	CX	CGMB	central gray substance of midbrain, Left	39971	100	102	105
9079	19	2564	CX	PTec	Pretectal Region	87394	104	100	105
4260	19	2587	CX	S	subiculum, Right	39548	67	105	107
4263	19	2562	CX	CA1	CA1 field, Right	39547	62	105	108
4264	19	2570	CX	CA2	CA2 field, Right	39478	62	103	109
4265	19	2578	CX	CA3	CA3 field, Right	39477	63	103	108
4266	19	2586	CX	CA4	CA4 field, Right	39475	64	104	108
4267	19	2515	CX	DG	Dentate gyrus, Right	39439	64	104	108
4285	19	2500	CX	TCd	Tail of Caudate Nucleus, Right	67111	63	100	108
4455	19	2539	CX	DTM	Medial Group of Nuclei, Right	67122	90	92	108
4464	19	2523	CX	DTLd	Lateral group of Nuclei, Right, Dorsal Division	67124	73	97	108
4472	19	2531	CX	DTLv	Lateral group of Nuclei, Right, Ventral division	67123	73	91	108
4483	19	2516	CX	DTP	Posterior Group of Nuclei, Right	67120	86	99	107
4487	19	2571	CX	ILr	Rostral Group of intralaminar Nuclei, Right	67125	85	93	108
4492	19	2563	CX	ILc	Caudal Group of Intralaminar Nuclei, Right	67170	87	94	108
4528	19	2555	CX	Hm	Medial Habenular Nucleus, Right	75014	95	96	106
4529	19	2547	CX	Hl	Lateral Habenular Nucleus, Right	87442	94	97	106
9004	19	2499	CX	CGMB	central gray substance of midbrain, Left	75016	96	102	106
9005	19	2507	CX	CGMB	central gray substance of midbrain, Right	67190	96	103	106
9079	19	2579	CX	PTec	Pretectal Region	87432	89	100	107
4472	19	2508	CX	DTLv	Lateral group of Nuclei, Right, Ventral division	75476	73	91	108
4251	15	2411	CX	S	subiculum, Left	41706	113	112	88
4254	15	2474	CX	CA1	CA1 field, Left	41707	120	109	88
4342	15	2458	CX	BLA	Basolateral Nucleus, Left	69037	116	104	88
4379	15	2403	CX	LA	Lateral Nucleus, Left	81015	119	105	88
4260	21	2401	CX	S	subiculum, Right	36873	-36	-58	15
4263	21	2413	CX	CA1	CA1 field, Right	36871	-36	-58	15
4264	21	2429	CX	CA2	CA2 field, Right	36870	-36	-58	15
4265	21	2437	CX	CA3	CA3 field, Right	36869	-36	-58	15
4266	21	2409	CX	CA4	CA4 field, Right	36868	-36	-58	15
4267	21	2445	CX	DG	Dentate gyrus, Right	36867	-36	-58	15
4263	21	2421	CX	CA1	CA1 field, Right	36874	-36	-58	15
4782	66	2721	CB	Dt	Dentate Nucleus, Left	41727	104	130	123
4789	70	2705	CB	Fas	Fastigial Nucleus, Right	73448	87	133	117
4782	67	2697	CB	Dt	Dentate Nucleus, Left	56001	102	130	122
4787	71	2713	CB	Dt	Dentate Nucleus, Right	65121	83	129	127
4323	12	2689	CX	Cl	Claustrum, Right	38505	71	96	67
4450	16	2658	CX	DTA	Anterior Group of Nuclei, Right	665539	89	79	91
4534	16	2682	CX	Pa	Paraventricular Nuclei, Left of Thalamus, Left	665538	91	89	93
4260	16	2667	CX	S	subiculum, Right	39174	68	109	98
4263	16	2611	CX	CA1	CA1 field, Right	64946	60	108	97
4264	16	2604	CX	CA2	CA2 field, Right	55429	65	105	95
4265	16	2612	CX	CA3	CA3 field, Right	55610	64	108	97
4266	16	2619	CX	CA4	CA4 field, Right	39211	62	107	96
4267	16	2627	CX	DG	Dentate gyrus, Right	39172	62	107	96
4285	16	2596	CX	TCd	Tail of Caudate Nucleus, Right	56066	57	106	98
4596	16	2635	CX	LHA	Lateral hypothalamic area, Left	240495	90	100	94
4627	16	2643	CX	LHA	Lateral hypothalamic area, Right	240497	79	100	96
4679	16	2651	CX	PHA	Posterior Hypothalamic Area, Left	240671	87	94	94
4693	16	2659	CX	PHA	Posterior Hypothalamic Area, Right	240496	82	95	94
9077	16	2683	CX	SNC	Substantia Nigra, pars compacta, Right	39267	71	103	97
4395	17	2685	CX	DTA	Anterior Group of Nuclei, Left	87539	100	82	98
4400	17	2598	CX	DTM	Medial Group of Nuclei, Left	87540	95	88	100
4487	17	2684	CX	ILr	Rostral Group of intralaminar Nuclei, Right	87522	87	88	103
4519	17	2637	CX	Sb	Subthalamic Nucleus, Right	87624	78	95	101
4534	17	2597	CX	Pa	Paraventricular Nuclei, Left of Thalamus, Left	420079	93	91	100
4537	17	2606	CX	Pa	Paraventricular Nuclei, Right of Thalamus, Right	420080	93	94	100
9004	17	2636	CX	CGMB	central gray substance of midbrain, Left	668916	95	97	100
9067	17	2622	CX	VTA	ventral tegmental area, Left	87534	95	101	101
9068	17	2661	CX	VTA	ventral tegmental area, Right	87535	92	100	101
4395	18	2593	CX	DTA	Anterior Group of Nuclei, Left	346197	100	80	99
4400	18	2649	CX	DTM	Medial Group of Nuclei, Left	346199	100	88	102
4417	18	2633	CX	DTLv	Lateral group of Nuclei, Left, Ventral division	346201	109	88	101
4432	18	2634	CX	ILr	Rostral Group of intralaminar Nuclei, Left	346198	104	86	101
4450	18	2601	CX	DTA	Anterior Group of Nuclei, Right	346196	89	82	104
4455	18	2657	CX	DTM	Medial Group of Nuclei, Right	246998	90	92	104
4472	18	2641	CX	DTLv	Lateral group of Nuclei, Right, Ventral division	346194	81	89	106
4487	18	2642	CX	ILr	Rostral Group of intralaminar Nuclei, Right	346195	86	87	106
4492	18	2609	CX	ILc	Caudal Group of Intralaminar Nuclei, Right	346205	85	96	104
4506	18	2618	CX	R	Reticular Nucleus of Thalamus, Left	690755	112	82	101
4512	18	2626	CX	R	Reticular Nucleus of Thalamus, Right	346193	78	82	106
4534	18	2681	CX	Pa	Paraventricular Nuclei, Left of Thalamus, Left	690753	94	95	103
4537	18	2594	CX	Pa	Paraventricular Nuclei, Right of Thalamus, Right	692725	94	96	103
9004	18	2617	CX	CGMB	central gray substance of midbrain, Left	690751	94	99	103
9005	18	2625	CX	CGMB	central gray substance of midbrain, Right	690752	91	99	103
9031	18	2665	CX	3	Oculomotor Nuclear Complex, Left	690749	93	102	103
9039	18	2673	CX	3	Oculomotor Nuclear Complex, Right	690666	93	102	103
9054	18	2610	CX	RN	Red Nucleus, Left	345251	98	99	103
9074	18	2650	CX	SNC	Substantia Nigra, pars compacta, Left	344708	106	101	102
4323	11	2985	CX	Cl	Claustrum, Right	40517	66	92	63
4323	18	2801	CX	Cl	Claustrum, Right	41516	66	81	104
4440	18	2273	CX	LGd	Dorsal Lateral Geniculate Nucleus, Left	41473	116	94	101
4266	17	2785	CX	CA4	CA4 field, Right	41142	63	104	106
4267	17	2793	CX	DG	Dentate gyrus, Right	41141	63	104	106
4787	72	2795	CB	Dt	Dentate Nucleus, Right	73345	81	130	121
4789	69	2787	CB	Fas	Fastigial Nucleus, Right	75936	91	125	124
4783	67	2874	CB	Emb	Emboliform Nucleus, Left	56000	101	127	114
4251	17	2858	CX	S	subiculum, Left	41212	114	108	100
4254	17	2850	CX	CA1	CA1 field, Left	41211	124	107	100
4281	17	2866	CX	TCd	Tail of Caudate Nucleus, Left	41213	124	102	98
4450	19	2809	CX	DTA	Anterior Group of Nuclei, Right	67019	84	85	109
4472	19	2817	CX	DTLv	Lateral group of Nuclei, Right, Ventral division	67020	75	86	108
4487	19	2825	CX	ILr	Rostral Group of intralaminar Nuclei, Right	73214	84	88	109
4395	19	2929	CX	DTA	Anterior Group of Nuclei, Left	66981	102	80	102
4400	19	2857	CX	DTM	Medial Group of Nuclei, Left	80127	100	92	105
4417	19	2849	CX	DTLv	Lateral group of Nuclei, Left, Ventral division	66985	112	87	105
4432	19	2865	CX	ILr	Rostral Group of intralaminar Nuclei, Left	80126	104	87	104
4437	19	2841	CX	ILc	Caudal Group of Intralaminar Nuclei, Left	66984	106	94	105
4322	12	2977	CX	Cl	Claustrum, Left	36307	121	90	67
4455	16	3001	CX	DTM	Medial Group of Nuclei, Right	665541	91	86	93
4472	16	2993	CX	DTLv	Lateral group of Nuclei, Right, Ventral division	665542	87	85	92
4512	16	3009	CX	R	Reticular Nucleus of Thalamus, Right	362512	82	84	92
4537	16	3050	CX	Pa	Paraventricular Nuclei, Right of Thalamus, Right	665540	91	88	93
4314	16	3017	CX	SI	Substantia Innominata, Right	56068	72	93	94
4519	16	2803	CX	Sb	Subthalamic Nucleus, Right	39177	73	98	95
9074	16	2811	CX	SNC	Substantia Nigra, pars compacta, Left	344600	93	104	95
4417	17	3041	CX	DTLv	Lateral group of Nuclei, Left, Ventral division	87542	105	84	98
4450	17	3033	CX	DTA	Anterior Group of Nuclei, Right	87520	86	80	101
4455	17	3057	CX	DTM	Medial Group of Nuclei, Right	692605	90	88	102
4472	17	3049	CX	DTLv	Lateral group of Nuclei, Right, Ventral division	87525	82	89	102
4506	17	3065	CX	R	Reticular Nucleus of Thalamus, Left	87541	110	83	97
4507	17	3018	CX	ZI	Zona Incerta, Left	690726	100	92	99
4512	17	2978	CX	R	Reticular Nucleus of Thalamus, Right	87521	76	85	101
4513	17	3026	CX	ZI	Zona Incerta, Right	87536	82	96	100
4518	17	3090	CX	Sb	Subthalamic Nucleus, Left	87528	107	95	99
9005	17	3025	CX	CGMB	central gray substance of midbrain, Right	668917	93	98	100
9054	17	3034	CX	RN	Red Nucleus, Left	87527	101	100	100
9057	17	2986	CX	RN	Red Nucleus, Right	668919	86	100	101
9074	17	3002	CX	SNC	Substantia Nigra, pars compacta, Left	87529	109	99	99
9075	17	3010	CX	SNR	Substantia Nigra, pars reticulata, Left	87530	111	99	99
4329	14	2786	CX	ATZ	Amygdaloid Transition zone, Left	73464	114	101	83
4342	14	2794	CX	BLA	Basolateral Nucleus, Left	81221	116	107	83
4351	14	2810	CX	BMA	Basomedial nucleus, Left	81220	117	102	83
4379	14	2873	CX	LA	Lateral Nucleus, Left	73461	122	109	83
4379	14	2802	CX	LA	Lateral Nucleus, Left	82143	122	109	83
4307	15	2842	CX	SI	Substantia Innominata, Left	41716	116	97	87
4360	15	2826	CX	CeA	Central Nucleus, Left	40336	118	100	87
4367	15	2834	CX	COMA	Cortico-medial group, Left	73235	113	99	88
4172	16	883	CX	PLT	planum temporale, Left	39008	154	88	88
4178	16	915	CX	PLP	planum polare, Left	39009	134	98	89
4270	16	907	CX	LIG	Long Insular Gyri, Left	39004	129	92	89
4139	16	868	CX	STG-i	superior temporal gyrus, Right, inferior bank of gyrus	39027	48	101	93
4145	16	955	CX	MTG-s	middle temporal gyrus, Right, superior bank of gyrus	39028	47	104	94
4146	16	939	CX	MTG-i	middle temporal gyrus, Right, inferior bank of gyrus	39029	38	110	95
4153	16	876	CX	ITG-its	inferior temporal gyrus, Right, bank of the its	39034	51	118	98
4154	16	884	CX	ITG-l	inferior temporal gyrus, Right, lateral bank of gyrus	39033	46	122	98
4155	16	923	CX	ITG-mts	inferior temporal gyrus, Right, bank of mts	39031	38	113	96
4136	16	892	CX	STG-i	superior temporal gyrus, Left, inferior bank of gyrus	39043	141	97	92
4142	16	900	CX	MTG-s	middle temporal gyrus, Left, superior bank of gyrus	39042	142	105	94
4143	16	908	CX	MTG-i	middle temporal gyrus, Left, inferior bank of gyrus	39044	142	109	94
4323	14	2209	CX	Cl	Claustrum, Right	38881	64	86	83
4322	14	2233	CX	Cl	Claustrum, Left	39255	124	87	82
4107	22	873	CX	SMG-i	supramarginal gyrus, Left, inferior bank of gyrus	38604	153	74	119
4026	8	865	CX	SFG-m	superior frontal gyrus, Right, medial bank of gyrus	27968	87	57	45
4323	15	2241	CX	Cl	Claustrum, Right	40536	61	92	86
4322	17	2265	CX	Cl	Claustrum, Left	41536	125	89	94
4322	18	2289	CX	Cl	Claustrum, Left	41476	124	80	99
4322	15	2249	CX	Cl	Claustrum, Left	40556	125	91	85
4034	16	897	CX	MFG-i	middle frontal gyrus, Right, inferior bank of gyrus	39323	55	54	81
4023	16	905	CX	SFG-m	superior frontal gyrus, Left, medial bank of gyrus	38618	100	45	74
4026	16	913	CX	SFG-m	superior frontal gyrus, Right, medial bank of gyrus	38619	87	48	77
4223	16	866	CX	CgGf-s	Cingulate gyrus, frontal part, Left, superior bank of gyrus	38632	102	65	73
4224	16	953	CX	CgGf-i	Cingulate gyrus, frontal part, Left, inferior bank of gyrus	38633	94	68	74
4226	16	937	CX	CgGf-s	Cingulate gyrus, frontal part, Right, superior bank of gyrus	38635	86	64	76
4227	16	945	CX	CgGf-i	Cingulate gyrus, frontal part, Right, inferior bank of gyrus	38634	91	68	75
4024	16	882	CX	SFG-l	superior frontal gyrus, Left, lateral bank of gyrus	38642	111	39	73
4030	16	874	CX	MFG-s	middle frontal gyrus, Left, superior bank of gyrus	81143	118	40	74
4012	16	898	CX	PrG-prc	precentral gyrus, Left, bank of the precentral sulcus	38652	139	62	83
4013	16	890	CX	PrG-sl	precentral gyrus, Left, superior lateral aspect of gyrus	38653	149	59	85
4031	16	906	CX	MFG-i	middle frontal gyrus, Left, inferior bank of gyrus	38650	136	62	79
4017	16	867	CX	PrG-prc	precentral gyrus, Right, bank of the precentral sulcus	38936	40	67	85
4019	16	954	CX	PrG-il	precentral gyrus, Right, inferior lateral aspect of gyrus	38935	34	67	87
4092	16	938	CX	PoG-cs	post central gyrus, Right, bank of the central sulcus	38933	40	76	89
4093	16	930	CX	PoG-sl	post central gyrus, Right, superior lateral aspect of gyrus	38932	32	76	88
4094	16	922	CX	PoG-il	post central gyrus, Right, inferior lateral aspect of gyrus	38930	30	80	89
4284	16	885	CX	HCd	Head of Caudate Nucleus, Right	248615	80	74	91
4289	16	901	CX	Pu	Putamen, Right	248612	72	84	93
4298	16	909	CX	GPe	globus pallidus, external segment, Right	248613	73	88	92
4014	16	875	CX	PrG-il	precentral gyrus, Left, inferior lateral aspect of gyrus	39007	153	81	86
4135	16	891	CX	STG-l	superior temporal gyrus, Left, lateral bank of gyrus	39006	157	92	91
4166	16	899	CX	HG	Heschel's gyrus, Left	39005	141	87	89
4150	16	932	CX	ITG-l	inferior temporal gyrus, Left, lateral bank of gyrus	39047	145	122	94
4167	16	948	CX	HG	Heschel's gyrus, Right	39657	45	91	90
4170	16	956	CX	TG	transverse gyri, Right	39658	38	89	90
4274	16	877	CX	SIG	Short Insular Gyri, Right	39660	51	88	90
4280	16	949	CX	HCd	Head of Caudate Nucleus, Left	40075	110	73	88
4288	16	933	CX	Pu	Putamen, Left	40074	119	88	91
4296	16	917	CX	GPi	globus pallidus, internal segment, Left	51234	111	90	92
4323	17	2257	CX	Cl	Claustrum, Right	40314	63	87	97
4031	16	914	CX	MFG-i	middle frontal gyrus, Left, inferior bank of gyrus	38654	140	60	79
4155	16	931	CX	ITG-mts	inferior temporal gyrus, Right, bank of mts	39244	40	112	96
4146	16	947	CX	MTG-i	middle temporal gyrus, Right, inferior bank of gyrus	39245	41	109	95
4151	16	916	CX	ITG-mts	inferior temporal gyrus, Left, bank of mts	39357	142	113	94
4284	16	893	CX	HCd	Head of Caudate Nucleus, Right	248616	80	74	91
4288	16	941	CX	Pu	Putamen, Left	40074	119	88	91
4472	18	2361	CX	DTLv	Lateral group of Nuclei, Right, Ventral division	41647	76	93	104
4260	17	2305	CX	S	subiculum, Right	41146	70	105	105
4263	17	2313	CX	CA1	CA1 field, Right	41145	61	107	106
4264	17	2321	CX	CA2	CA2 field, Right	41144	61	102	105
4265	17	2329	CX	CA3	CA3 field, Right	41143	64	103	106
4285	17	2353	CX	TCd	Tail of Caudate Nucleus, Right	41149	60	101	105
4784	68	2387	CB	Fas	Fastigial Nucleus, Left	73216	95	121	122
4785	68	2395	CB	Glo	Globose Nucleus, Left	73251	94	124	124
4323	13	2362	CX	Cl	Claustrum, Right	32180	64	88	70
4323	13	2378	CX	Cl	Claustrum, Right	82148	65	107	74
4322	13	2386	CX	Cl	Claustrum, Left	73224	121	110	73
4323	16	2371	CX	Cl	Claustrum, Right	39655	65	89	93
4260	18	2355	CX	S	subiculum, Right	64893	73	105	107
4264	18	2307	CX	CA2	CA2 field, Right	64890	70	112	106
4265	18	2315	CX	CA3	CA3 field, Right	64891	63	103	107
4266	18	2323	CX	CA4	CA4 field, Right	40614	64	105	107
4267	18	2331	CX	DG	Dentate gyrus, Right	40613	65	105	107
4285	18	2363	CX	TCd	Tail of Caudate Nucleus, Right	64895	60	102	104
4495	18	2339	CX	LGd	Dorsal Lateral Geniculate Nucleus, Right	40615	73	101	103
4322	13	2370	CX	Cl	Claustrum, Left	33431	122	94	69
4322	16	2379	CX	Cl	Claustrum, Left	40076	123	87	91
4260	20	2393	CX	S	subiculum, Right	38731	73	103	111
4263	20	2306	CX	CA1	CA1 field, Right	38730	63	104	111
4264	20	2322	CX	CA2	CA2 field, Right	38729	64	100	111
4265	20	2330	CX	CA3	CA3 field, Right	38728	66	100	111
4266	20	2338	CX	CA4	CA4 field, Right	38727	66	101	111
4267	20	2346	CX	DG	Dentate gyrus, Right	38726	67	101	111
4464	20	2385	CX	DTLd	Lateral group of Nuclei, Right, Dorsal Division	67276	81	92	111
4263	20	2314	CX	CA1	CA1 field, Right	38730	63	104	111
9525	92	4225	BS	CGS	central glial substance	973634	92	161	105
9556	92	4257	BS	Gr	gracile nucleus, Right	975008	92	161	110
9589	92	4265	BS	CMRt	central medullary reticular group, Left	973609	98	161	107
9593	92	4273	BS	CMRt	central medullary reticular group, Right	973608	90	161	107
9677	92	4281	BS	Sp5	spinal trigeminal nucleus, Left	973636	96	161	108
9684	92	4289	BS	Sp5	spinal trigeminal nucleus, Right	973635	89	161	108
9525	92	4348	BS	CGS	central glial substance	976677	92	156	105
9543	92	4356	BS	Cu	cuneate nucleus, Left	975206	94	156	108
9544	92	4364	BS	Cu	cuneate nucleus, Right	975207	91	156	107
9614	92	4404	BS	LMRt	lateral medullary reticular group, Left	976771	96	156	103
9619	92	4412	BS	LMRt	lateral medullary reticular group, Right	973512	89	156	103
9677	92	4325	BS	Sp5	spinal trigeminal nucleus, Left	973645	96	156	108
9684	92	4333	BS	Sp5	spinal trigeminal nucleus, Right	973644	89	156	108
9521	92	4329	BS	Arc	arcuate nucleus of medulla, Right	976022	91	149	96
9543	92	4337	BS	Cu	cuneate nucleus, Left	976131	97	149	108
9544	92	4345	BS	Cu	cuneate nucleus, Right	976128	87	149	109
9546	92	4353	BS	10	dorsal motor nucleus of the vagus, Left	977118	93	149	108
9547	92	4361	BS	10	dorsal motor nucleus of the vagus, Right	977117	91	149	108
9561	92	4393	BS	IO	inferior olivary complex, Left	933993	97	149	101
9565	92	4401	BS	IO	inferior olivary complex, Right	933991	87	149	100
9589	92	4409	BS	CMRt	central medullary reticular group, Left	974259	95	149	105
9593	92	4322	BS	CMRt	central medullary reticular group, Right	974262	88	149	105
9619	92	4338	BS	LMRt	lateral medullary reticular group, Right	974261	86	149	103
9677	92	4354	BS	Sp5	spinal trigeminal nucleus, Left	971139	98	149	106
9684	92	4362	BS	Sp5	spinal trigeminal nucleus, Right	971142	86	149	106
9556	92	4370	BS	Gr	gracile nucleus, Right	976129	91	149	110
9525	92	4378	BS	CGS	central glial substance	974263	92	149	108
9520	92	4386	BS	Arc	arcuate nucleus of medulla, Left	975500	95	152	98
9525	92	4402	BS	CGS	central glial substance	975522	92	152	106
9544	92	4323	BS	Cu	cuneate nucleus, Right	976018	89	152	107
9546	92	4331	BS	10	dorsal motor nucleus of the vagus, Left	977225	93	152	107
9547	92	4339	BS	10	dorsal motor nucleus of the vagus, Right	977226	92	152	107
9555	92	4347	BS	Gr	gracile nucleus, Left	976021	93	152	110
9556	92	4355	BS	Gr	gracile nucleus, Right	976019	91	152	110
9558	92	4363	BS	12	hypoglossal nucleus, Left	975521	93	152	105
9559	92	4371	BS	12	hypoglossal nucleus, Right	975520	92	152	105
9561	92	4379	BS	IO	inferior olivary complex, Left	959701	94	152	101
9565	92	4387	BS	IO	inferior olivary complex, Right	959700	90	152	101
9589	92	4395	BS	CMRt	central medullary reticular group, Left	973905	95	152	103
9593	92	4403	BS	CMRt	central medullary reticular group, Right	973904	89	152	104
9614	92	4411	BS	LMRt	lateral medullary reticular group, Left	973914	97	152	102
9619	92	4324	BS	LMRt	lateral medullary reticular group, Right	976865	87	152	101
9677	92	4332	BS	Sp5	spinal trigeminal nucleus, Left	976866	97	152	106
9684	92	4340	BS	Sp5	spinal trigeminal nucleus, Right	976864	87	152	105
9150	91	6249	BS	LC	locus ceruleus, Right	992750	85	127	105
9493	91	6243	BS	Pn	pontine nuclei, Right	983554	85	123	92
9155	91	6250	BS	SubC	nucleus subceruleus, Left	988478	98	127	104
9150	91	6282	BS	LC	locus ceruleus, Right	985016	87	123	107
9161	91	6164	BS	PRF	Pontine Reticular Formation, Left	983787	95	118	102
9067	91	6210	BS	VTA	ventral tegmental area, Left	995134	96	114	94
9521	92	4394	BS	Arc	arcuate nucleus of medulla, Right	975513	87	152	98
9493	91	6234	BS	Pn	pontine nuclei, Right	995667	89	114	88
9492	91	6148	BS	Pn	pontine nuclei, Left	983649	101	118	93
9492	91	6330	BS	Pn	pontine nuclei, Left	983555	99	123	93
9146	91	6180	BS	LPB	lateral parabrachial nucleus, Left	995606	101	118	105
9147	91	6266	BS	LPB	lateral parabrachial nucleus, Right	992744	82	123	105
9161	91	6306	BS	PRF	Pontine Reticular Formation, Left	983141	94	123	104
9149	91	6226	BS	LC	locus ceruleus, Left	997889	96	114	106
9492	91	6289	BS	Pn	pontine nuclei, Left	983196	98	127	93
9150	91	6147	BS	LC	locus ceruleus, Right	997888	90	114	104
9214	91	6329	BS	Pr5	principal sensory nucleus of trigeminal nerve, Right	979640	78	127	101
9149	91	6274	BS	LC	locus ceruleus, Left	985017	96	123	107
9149	91	6219	BS	LC	locus ceruleus, Left	985023	96	118	106
9169	91	6314	BS	PRF	Pontine Reticular Formation, Right	983139	90	123	104
9161	91	6257	BS	PRF	Pontine Reticular Formation, Left	983060	94	127	102
9214	91	6177	BS	Pr5	principal sensory nucleus of trigeminal nerve, Right	979581	84	132	106
9156	91	6153	BS	SubC	nucleus subceruleus, Right	988299	86	132	104
9004	91	6193	BS	CGMB	central gray substance of midbrain, Left	994968	94	114	106
9026	91	6217	BS	SubCn	subcuneiform nucleus, Right	997933	88	114	105
9150	91	6227	BS	LC	locus ceruleus, Right	985022	88	118	105
9004	91	6155	BS	CGMB	central gray substance of midbrain, Left	992558	94	118	106
9057	91	6225	BS	RN	Red Nucleus, Right	995128	91	114	92
9078	91	6211	BS	SNR	Substantia Nigra, pars reticulata, Right	998003	87	118	98
9005	91	6201	BS	CGMB	central gray substance of midbrain, Right	994967	92	114	106
9147	91	6188	BS	LPB	lateral parabrachial nucleus, Right	995607	83	118	102
9169	91	6265	BS	PRF	Pontine Reticular Formation, Right	983581	90	127	102
9074	91	6178	BS	SNC	Substantia Nigra, pars compacta, Left	991141	99	114	94
9156	91	6242	BS	SubC	nucleus subceruleus, Right	988514	84	127	103
9155	91	6145	BS	SubC	nucleus subceruleus, Left	988264	99	132	104
9077	91	6203	BS	SNC	Substantia Nigra, pars compacta, Right	995041	90	118	96
9169	91	6172	BS	PRF	Pontine Reticular Formation, Right	983982	90	118	102
9068	91	6233	BS	VTA	ventral tegmental area, Right	994469	90	114	94
9178	91	6273	BS	SOC	Superior Olivary Complex, Left	978919	100	127	102
9065	91	6202	BS	4	trochlear nucleus, Right	994758	92	114	99
9149	91	6241	BS	LC	locus ceruleus, Left	992749	99	127	107
9186	91	6281	BS	SOC	Superior Olivary Complex, Right	979026	82	127	100
9455	91	6235	BS	MBRa	Midbrain Raphe Nuclei	986843	92	118	105
9493	91	6297	BS	Pn	pontine nuclei, Right	983195	85	127	92
9077	91	6146	BS	SNC	Substantia Nigra, pars compacta, Right	991143	88	114	92
9455	91	6162	BS	MBRa	Midbrain Raphe Nuclei	997890	93	114	104
9455	91	6322	BS	MBRa	Midbrain Raphe Nuclei	986095	92	123	106
9022	91	6209	BS	SubCn	subcuneiform nucleus, Left	997935	99	114	105
9064	91	6194	BS	4	trochlear nucleus, Left	994759	94	114	98
9520	92	6913	BS	Arc	arcuate nucleus of medulla, Left	977417	92	146	97
9521	92	6921	BS	Arc	arcuate nucleus of medulla, Right	977416	90	146	95
9598	92	6945	BS	GiRt	gigantocellular group, Left	976699	94	146	104
9619	92	6969	BS	LMRt	lateral medullary reticular group, Right	977415	87	146	102
9642	92	6977	BS	RaM	raphe nuclei of medulla	976455	92	146	104
9677	92	6985	BS	Sp5	spinal trigeminal nucleus, Left	974802	98	146	104
9698	92	7001	BS	8Ve	vestibular nuclei, Left	976182	96	146	109
9703	92	6914	BS	8Ve	vestibular nuclei, Right	976185	89	146	110
9546	92	6930	BS	10	dorsal motor nucleus of the vagus, Left	976181	94	146	108
9547	92	6938	BS	10	dorsal motor nucleus of the vagus, Right	976180	91	146	108
9137	91	6842	BS	6	abducens nucleus, Left	978024	97	137	109
9138	91	6850	BS	6	abducens nucleus, Right	978026	91	137	109
9157	91	6874	BS	RPn	pontine raphe nucleus	983608	92	137	102
9178	91	6882	BS	SOC	Superior Olivary Complex, Left	978214	99	137	102
9186	91	6890	BS	SOC	Superior Olivary Complex, Right	978215	88	137	102
9492	91	6659	BS	Pn	pontine nuclei, Left	977564	96	137	91
9493	91	6667	BS	Pn	pontine nuclei, Right	977561	88	137	91
9677	91	6898	BS	Sp5	spinal trigeminal nucleus, Left	980188	99	137	105
9534	91	6843	BS	8Co	cochlear nuclei, Right	977569	80	137	104
9561	91	6859	BS	IO	inferior olivary complex, Left	933554	95	137	100
9565	91	6867	BS	IO	inferior olivary complex, Right	933555	88	137	100
9520	91	6883	BS	Arc	arcuate nucleus of medulla, Left	977563	92	137	96
9492	91	6817	BS	Pn	pontine nuclei, Left	977305	96	141	93
9493	91	6825	BS	Pn	pontine nuclei, Right	977306	89	141	92
9520	91	6833	BS	Arc	arcuate nucleus of medulla, Left	977268	94	141	95
9521	91	6841	BS	Arc	arcuate nucleus of medulla, Right	977267	90	141	95
9529	91	6849	BS	8Co	cochlear nuclei, Left	977269	102	141	104
9598	91	6881	BS	GiRt	gigantocellular group, Left	974986	94	141	102
9604	91	6889	BS	GiRt	gigantocellular group, Right	974985	89	141	103
9698	91	6826	BS	8Ve	vestibular nuclei, Left	979732	97	141	108
9703	91	6834	BS	8Ve	vestibular nuclei, Right	984454	88	141	108
9169	91	6635	BS	PRF	Pontine Reticular Formation, Right	982052	90	132	102
9178	91	6561	BS	SOC	Superior Olivary Complex, Left	978897	100	132	102
9493	91	6651	BS	Pn	pontine nuclei, Right	977911	86	132	93
9684	91	6617	BS	Sp5	spinal trigeminal nucleus, Right	985003	84	132	104
9137	91	6538	BS	6	abducens nucleus, Left	977815	96	132	106
9138	91	6860	BS	6	abducens nucleus, Right	977816	90	132	106
* the locations of all sampled structures are given in native MRI voxel coordinates
(mri_cx	mri_cy	mri_cz)

## Sheet: H0351.2002
Table S9.2: Microarray measurements in donor H0351.2002
structure_id	slab_num	well_id	slab_type	structure_acronym	structure_name	polygon_id	mri_x *	mri_y	mri_z
4274	10	4565	CX	SIG	Short Insular Gyri, Right	978419	62	81	69
4284	10	4549	CX	HCd	Head of Caudate Nucleus, Right	978418	81	77	69
4289	10	4557	CX	Pu	Putamen, Right	978378	74	87	69
4043	10	4588	CX	opIFG	inferior frontal gyrus, opercular part, Right	978447	44	84	66
4058	10	4596	CX	POrG	posterior orbital gyrus, Right	978444	66	103	69
4906	10	4604	CX	TP-s	temporal pole, Right, superior aspect	978446	59	104	69
4014	10	4581	CX	PrG-il	precentral gyrus, Left, inferior lateral aspect of gyrus	978624	139	83	71
4069	10	4573	CX	PaOG	parolfactory gyri, Left	978622	119	102	71
4273	10	4589	CX	SIG	Short Insular Gyri, Left	978621	124	80	71
4903	10	4597	CX	TP-s	temporal pole, Left, superior aspect	978623	138	94	71
4904	10	4541	CX	TP-i	temporal pole, Left, inferior aspect	979001	128	126	71
4907	10	4517	CX	TP-i	temporal pole, Right, inferior aspect	978916	56	119	71
4908	10	4525	CX	TP-m	temporal pole, Right, medial aspect	978913	72	127	71
4907	10	4533	CX	TP-i	temporal pole, Right, inferior aspect	983191	57	117	71
4012	10	4572	CX	PrG-prc	precentral gyrus, Left, bank of the precentral sulcus	978417	139	70	70
4024	10	4564	CX	SFG-l	superior frontal gyrus, Left, lateral bank of gyrus	982943	125	41	65
4030	10	4556	CX	MFG-s	middle frontal gyrus, Left, superior bank of gyrus	980080	130	43	65
4027	10	4524	CX	SFG-l	superior frontal gyrus, Right, lateral bank of gyrus	978329	70	42	64
4033	10	4516	CX	MFG-s	middle frontal gyrus, Right, superior bank of gyrus	978328	65	44	65
4034	10	4603	CX	MFG-i	middle frontal gyrus, Right, inferior bank of gyrus	978308	50	62	66
4026	4	4579	CX	SFG-m	superior frontal gyrus, Right, medial bank of gyrus	977536	82	78	29
4049	4	4539	CX	GRe	gyrus rectus, Right	977533	85	102	28
4051	4	4563	CX	MOrG	medial orbital gyrus, Left	981586	111	95	29
4052	4	4571	CX	MOrG	medial orbital gyrus, Right	977532	83	102	28
4898	4	4587	CX	SRoG	superior rostral gyrus, Left	977531	100	88	25
4899	4	4595	CX	SRoG	superior rostral gyrus, Right	977535	83	84	29
4901	4	4547	CX	IRoG	inferior rostral gyrus, Left	977530	99	91	25
4034	4	4523	CX	MFG-i	middle frontal gyrus, Right, inferior bank of gyrus	977494	58	76	28
4046	4	4531	CX	orIFG	inferior frontal gyrus, orbital part, Right	977493	64	93	28
4061	4	4515	CX	LOrG	lateral orbital gyrus, Right	977492	71	93	27
4023	4	4578	CX	SFG-m	superior frontal gyrus, Left, medial bank of gyrus	977475	102	80	25
4024	4	4562	CX	SFG-l	superior frontal gyrus, Left, lateral bank of gyrus	983142	108	59	25
4027	4	4570	CX	SFG-l	superior frontal gyrus, Right, lateral bank of gyrus	977462	85	50	29
4030	4	4546	CX	MFG-s	middle frontal gyrus, Left, superior bank of gyrus	977469	110	60	25
4033	4	4554	CX	MFG-s	middle frontal gyrus, Right, superior bank of gyrus	977458	82	50	29
4024	4	4586	CX	SFG-l	superior frontal gyrus, Left, lateral bank of gyrus	983143	108	60	25
4030	2	4538	CX	MFG-s	middle frontal gyrus, Left, superior bank of gyrus	976928	108	90	18
4031	2	4530	CX	MFG-i	middle frontal gyrus, Left, inferior bank of gyrus	976929	108	96	18
4026	2	4514	CX	SFG-m	superior frontal gyrus, Right, medial bank of gyrus	976924	87	87	15
4891	2	4577	CX	FPi	frontal pole, Left, inferior aspect	976920	102	97	18
4892	2	4593	CX	FPm	frontal pole, Left, medial aspect	976921	94	101	17
4895	2	4585	CX	FPi	frontal pole, Right, inferior aspect	976922	84	102	15
4896	2	4601	CX	FPm	frontal pole, Right, medial aspect	976923	90	92	15
4891	2	4522	CX	FPi	frontal pole, Left, inferior aspect	983172	102	95	18
4024	2	4569	CX	SFG-l	superior frontal gyrus, Left, lateral bank of gyrus	980066	112	72	17
4023	2	4553	CX	SFG-m	superior frontal gyrus, Left, medial bank of gyrus	977023	98	81	16
4027	2	4537	CX	SFG-l	superior frontal gyrus, Right, lateral bank of gyrus	980073	77	71	16
4033	2	4529	CX	MFG-s	middle frontal gyrus, Right, superior bank of gyrus	980074	74	72	16
4034	2	4521	CX	MFG-i	middle frontal gyrus, Right, inferior bank of gyrus	980072	75	87	15
4894	2	4513	CX	FP-s	frontal pole, Right, superior aspect	980071	74	90	15
4894	2	4545	CX	FP-s	frontal pole, Right, superior aspect	983153	71	90	15
4280	9	4518	CX	HCd	Head of Caudate Nucleus, Left	976995	105	86	59
4288	9	4526	CX	Pu	Putamen, Left	976993	113	89	58
4023	10	4540	CX	SFG-m	superior frontal gyrus, Left, medial bank of gyrus	982936	101	56	63
4026	10	4548	CX	SFG-m	superior frontal gyrus, Right, medial bank of gyrus	982939	92	48	62
4226	10	4532	CX	CgGf-s	Cingulate gyrus, frontal part, Right, superior bank of gyrus	982937	101	60	62
4289	9	4605	CX	Pu	Putamen, Right	991070	76	89	58
4146	12	4630	CX	MTG-i	middle temporal gyrus, Right, inferior bank of gyrus	992976	49	113	83
4153	12	4638	CX	ITG-its	inferior temporal gyrus, Right, bank of the its	992968	57	121	84
4155	12	4654	CX	ITG-mts	inferior temporal gyrus, Right, bank of mts	992970	50	116	83
4145	12	4701	CX	MTG-s	middle temporal gyrus, Right, superior bank of gyrus	992925	46	107	83
4030	12	4677	CX	MFG-s	middle frontal gyrus, Left, superior bank of gyrus	992845	116	35	79
4058	8	4676	CX	POrG	posterior orbital gyrus, Right	993198	75	104	54
4042	8	4660	CX	opIFG	inferior frontal gyrus, opercular part, Left	993105	144	64	59
4023	8	4683	CX	SFG-m	superior frontal gyrus, Left, medial bank of gyrus	991116	101	62	47
4026	8	4699	CX	SFG-m	superior frontal gyrus, Right, medial bank of gyrus	991117	88	60	53
4027	8	4667	CX	SFG-l	superior frontal gyrus, Right, lateral bank of gyrus	990441	77	48	53
4024	6	4681	CX	SFG-l	superior frontal gyrus, Left, lateral bank of gyrus	984859	115	56	37
4051	6	4658	CX	MOrG	medial orbital gyrus, Left	983527	103	105	43
4902	6	4619	CX	IRoG	inferior rostral gyrus, Right	983536	89	98	41
4046	6	4626	CX	orIFG	inferior frontal gyrus, orbital part, Right	983520	51	92	40
4060	6	4651	CX	LOrG	lateral orbital gyrus, Left	984943	115	98	43
4223	6	4665	CX	CgGf-s	Cingulate gyrus, frontal part, Left, superior bank of gyrus	982050	100	75	39
4226	6	4673	CX	CgGf-s	Cingulate gyrus, frontal part, Right, superior bank of gyrus	982035	87	67	39
4027	6	4633	CX	SFG-l	superior frontal gyrus, Right, lateral bank of gyrus	981937	73	57	39
4024	4	4801	CX	SFG-l	superior frontal gyrus, Left, lateral bank of gyrus	983142	108	59	25
4030	2	4625	CX	MFG-s	middle frontal gyrus, Left, superior bank of gyrus	976928	108	90	18
4891	2	4617	CX	FPi	frontal pole, Left, inferior aspect	976920	102	97	18
4136	12	4686	CX	STG-i	superior temporal gyrus, Left, inferior bank of gyrus	993003	138	98	89
4142	12	4694	CX	MTG-s	middle temporal gyrus, Left, superior bank of gyrus	993004	140	101	89
4143	12	4702	CX	MTG-i	middle temporal gyrus, Left, inferior bank of gyrus	993005	140	110	88
4151	12	4615	CX	ITG-mts	inferior temporal gyrus, Left, bank of mts	993006	140	114	88
4154	12	4817	CX	ITG-l	inferior temporal gyrus, Right, lateral bank of gyrus	992969	52	123	83
4154	12	4646	CX	ITG-l	inferior temporal gyrus, Right, lateral bank of gyrus	992969	52	123	83
4162	12	4662	CX	FuG-its	fusiform gyrus, Right, bank of the its	992967	61	120	86
4155	12	4678	CX	ITG-mts	inferior temporal gyrus, Right, bank of mts	992975	52	115	83
4094	12	4685	CX	PoG-il	post central gyrus, Right, inferior lateral aspect of gyrus	992959	36	81	82
4139	12	4693	CX	STG-i	superior temporal gyrus, Right, inferior bank of gyrus	992924	48	104	83
4173	12	4614	CX	PLT	planum temporale, Right	992926	46	95	84
4145	12	4622	CX	MTG-s	middle temporal gyrus, Right, superior bank of gyrus	992927	43	105	83
4024	12	4669	CX	SFG-l	superior frontal gyrus, Left, lateral bank of gyrus	992848	111	35	79
4027	12	4645	CX	SFG-l	superior frontal gyrus, Right, lateral bank of gyrus	992801	65	40	75
4033	12	4653	CX	MFG-s	middle frontal gyrus, Right, superior bank of gyrus	992800	62	42	76
4027	12	4661	CX	SFG-l	superior frontal gyrus, Right, lateral bank of gyrus	992805	64	38	75
4906	8	4684	CX	TP-s	temporal pole, Right, superior aspect	993197	70	112	56
4903	8	4637	CX	TP-s	temporal pole, Left, superior aspect	993223	131	105	58
4048	8	4692	CX	GRe	gyrus rectus, Left	993213	104	101	54
4049	8	4700	CX	GRe	gyrus rectus, Right	993212	88	100	54
4051	8	4613	CX	MOrG	medial orbital gyrus, Left	993214	112	101	54
4052	8	4621	CX	MOrG	medial orbital gyrus, Right	993211	81	97	54
4031	8	4652	CX	MFG-i	middle frontal gyrus, Left, inferior bank of gyrus	993103	141	62	59
4079	8	4668	CX	fro	frontal operculum, Left	993106	126	79	57
4063	8	4809	CX	SCG	subcollosal gyrus, Left	992922	97	93	54
4063	8	4636	CX	SCG	subcollosal gyrus, Left	992922	97	93	54
4064	8	4644	CX	SCG	subcollosal gyrus, Right	992919	92	92	54
4024	8	4691	CX	SFG-l	superior frontal gyrus, Left, lateral bank of gyrus	991120	106	41	50
4030	8	4612	CX	MFG-s	middle frontal gyrus, Left, superior bank of gyrus	991119	107	46	51
4223	8	4620	CX	CgGf-s	Cingulate gyrus, frontal part, Left, superior bank of gyrus	991115	101	66	47
4033	8	4675	CX	MFG-s	middle frontal gyrus, Right, superior bank of gyrus	990469	74	53	53
4031	6	4697	CX	MFG-i	middle frontal gyrus, Left, inferior bank of gyrus	984866	137	68	44
4048	6	4642	CX	GRe	gyrus rectus, Left	983528	101	104	43
4049	6	4650	CX	GRe	gyrus rectus, Right	983537	87	104	41
4052	6	4666	CX	MOrG	medial orbital gyrus, Right	983538	85	105	41
4061	6	4674	CX	LOrG	lateral orbital gyrus, Right	983539	74	95	40
4224	6	4682	CX	CgGf-i	Cingulate gyrus, frontal part, Left, inferior bank of gyrus	983531	98	85	39
4227	6	4690	CX	CgGf-i	Cingulate gyrus, frontal part, Right, inferior bank of gyrus	983534	90	90	40
4898	6	4698	CX	SRoG	superior rostral gyrus, Left	983530	99	96	41
4901	6	4611	CX	IRoG	inferior rostral gyrus, Left	983529	101	98	41
4049	6	4627	CX	GRe	gyrus rectus, Right	984902	88	107	41
4034	6	4610	CX	MFG-i	middle frontal gyrus, Right, inferior bank of gyrus	983522	54	76	41
4040	6	4618	CX	trIFG	Inferior frontal gyrus, triangular part, Right	983521	50	90	40
4061	6	4634	CX	LOrG	lateral orbital gyrus, Right	983519	55	97	40
4039	6	4635	CX	trIFG	Inferior frontal gyrus, triangular part, Left	984938	129	85	44
4039	6	4659	CX	trIFG	Inferior frontal gyrus, triangular part, Left	984944	132	86	44
4023	6	4649	CX	SFG-m	superior frontal gyrus, Left, medial bank of gyrus	982047	96	63	38
4026	6	4657	CX	SFG-m	superior frontal gyrus, Right, medial bank of gyrus	982034	85	66	39
4033	6	4641	CX	MFG-s	middle frontal gyrus, Right, superior bank of gyrus	981936	70	59	39
4034	8	4825	CX	MFG-i	middle frontal gyrus, Right, inferior bank of gyrus	992896	57	67	53
4040	8	4833	CX	trIFG	Inferior frontal gyrus, triangular part, Right	992895	58	70	54
4080	8	4841	CX	fro	frontal operculum, Right	992867	62	80	54
4274	8	4849	CX	SIG	Short Insular Gyri, Right	992864	64	83	54
4088	12	4802	CX	PoG-sl	post central gyrus, Left, superior lateral aspect of gyrus	992898	151	58	88
4089	12	4810	CX	PoG-il	post central gyrus, Left, inferior lateral aspect of gyrus	992899	138	83	87
4166	12	4818	CX	HG	Heschel's gyrus, Left	992901	135	86	88
4172	12	4826	CX	PLT	planum temporale, Left	992900	143	86	88
4178	12	4834	CX	PLP	planum polare, Left	992902	132	92	89
4017	12	4857	CX	PrG-prc	precentral gyrus, Right, bank of the precentral sulcus	992760	55	52	80
4018	12	4865	CX	PrG-sl	precentral gyrus, Right, superior lateral aspect of gyrus	993785	48	47	83
4034	12	4873	CX	MFG-i	middle frontal gyrus, Right, inferior bank of gyrus	992761	56	50	79
4092	12	4881	CX	PoG-cs	post central gyrus, Right, bank of the central sulcus	992758	39	64	83
4093	12	4889	CX	PoG-sl	post central gyrus, Right, superior lateral aspect of gyrus	992757	35	65	83
4015	18	4866	CX	PrG-cs	precentral gyrus, Left, bank of the central sulcus	997583	99	34	112
4073	18	4874	CX	PCLa-s	paracentral lobule, anterior part, Left, superior bank of gyrus	997594	95	38	111
4074	18	4882	CX	PCLa-i	paracentral lobule, anterior part, Left, inferior bank of gyrus	997595	101	52	109
4087	18	4890	CX	PoG-cs	post central gyrus, Left, bank of the central sulcus	997582	100	32	112
4102	18	4842	CX	SPL-i	supraparietal lobule, Right, inferior bank of gyrus	997552	61	52	121
4109	18	4850	CX	SMG-s	supramarginal gyrus, Right, superior bank of gyrus	997551	59	58	121
4102	18	4858	CX	SPL-i	supraparietal lobule, Right, inferior bank of gyrus	997553	60	49	120
4034	10	4905	CX	MFG-i	middle frontal gyrus, Right, inferior bank of gyrus	978308	50	62	66
4031	4	4594	CX	MFG-i	middle frontal gyrus, Left, inferior bank of gyrus	977482	128	77	32
4891	2	4913	CX	FPi	frontal pole, Left, inferior aspect	983172	102	95	18
4073	18	4897	CX	PCLa-s	paracentral lobule, anterior part, Left, superior bank of gyrus	997594	95	38	111
4088	18	4803	CX	PoG-sl	post central gyrus, Left, superior lateral aspect of gyrus	997581	98	27	113
4101	18	4811	CX	SPL-s	supraparietal lobule, Right, superior bank of gyrus	997575	82	24	116
4124	18	4819	CX	Pcu-i	precuneus, Right, inferior lateral bank of gyrus	997576	82	57	113
4230	18	4827	CX	CgGp-s	Cingulate gyrus, parietal part, Left, superior bank of gyrus	997596	101	57	109
4233	18	4835	CX	CgGp-s	Cingulate gyrus, parietal part, Right, superior bank of gyrus	997577	83	59	113
4234	18	4843	CX	CgGp-i	Cingulate gyrus, parietal part, Right, inferior bank of gyrus	997578	85	62	113
4240	18	4859	CX	CgGr-s	Cingulate gyrus, retrosplenial part, Right, superior bank of gyrus	997579	87	64	113
4241	18	4867	CX	CgGr-i	Cingulate gyrus, retrosplenial part, Right, inferior bank of gyrus	997580	92	70	113
4143	18	4813	CX	MTG-i	middle temporal gyrus, Left, inferior bank of gyrus	997661	151	94	131
4200	18	4821	CX	OTG-s	occipito-temporal gyrus, Left, superior bank of gyrus	997659	123	98	131
4201	18	4829	CX	OTG-i	occipito-temporal gyrus, Left, inferior bank of gyrus	997660	135	105	131
4143	18	4837	CX	MTG-i	middle temporal gyrus, Left, inferior bank of gyrus	997662	152	92	130
4146	18	4868	CX	MTG-i	middle temporal gyrus, Right, inferior bank of gyrus	997651	43	107	127
4153	18	4876	CX	ITG-its	inferior temporal gyrus, Right, bank of the its	997643	53	108	127
4196	18	4884	CX	LiG-pest	lingual gyrus, Right, peristriate	997640	71	99	125
4204	18	4892	CX	OTG-i	occipito-temporal gyrus, Right, inferior bank of gyrus	997641	68	101	125
4107	18	4852	CX	SMG-i	supramarginal gyrus, Left, inferior bank of gyrus	997629	139	66	127
4142	18	4860	CX	MTG-s	middle temporal gyrus, Left, superior bank of gyrus	997630	142	75	129
4193	18	4820	CX	LiG-pest	lingual gyrus, Left, peristriate	997625	111	96	126
4194	18	4828	CX	LiG-str	lingual gyrus, Left, striate	997621	104	94	121
4238	18	4836	CX	CgGr-i	Cingulate gyrus, retrosplenial part, Left, inferior bank of gyrus	997620	104	93	119
4241	18	4844	CX	CgGr-i	Cingulate gyrus, retrosplenial part, Right, inferior bank of gyrus	997619	84	92	120
4117	18	4891	CX	AnG-i	angular gyrus, Right, inferior bank of gyrus	997607	37	68	125
4139	18	4804	CX	STG-i	superior temporal gyrus, Right, inferior bank of gyrus	997606	42	82	125
4145	18	4812	CX	MTG-s	middle temporal gyrus, Right, superior bank of gyrus	997605	43	85	126
4089	18	4875	CX	PoG-il	post central gyrus, Left, inferior lateral aspect of gyrus	997601	124	36	119
4090	18	4883	CX	PoG-pcs	post central gyrus, Left, bank of the posterior central sulcus	997602	133	49	120
4067	10	4921	CX	PTG	paraterminal gyrus, Right	998634	91	86	69
4069	10	4929	CX	PaOG	parolfactory gyri, Left	998633	97	80	72
4280	10	4937	CX	HCd	Head of Caudate Nucleus, Left	998631	102	80	71
4288	10	4945	CX	Pu	Putamen, Left	998632	110	90	71
4013	14	4948	CX	PrG-sl	precentral gyrus, Left, superior lateral aspect of gyrus	998583	111	35	88
4289	13	4922	CX	Pu	Putamen, Right	998104	72	83	93
4298	13	4930	CX	GPe	globus pallidus, external segment, Right	999888	74	87	93
4288	13	4938	CX	Pu	Putamen, Left	998109	117	84	93
4295	13	4946	CX	GPe	globus pallidus, external segment, Left	998110	113	85	93
4295	13	4954	CX	GPe	globus pallidus, external segment, Left	999945	113	85	93
4282	13	4962	CX	BCd	Body of Caudate Nucleus, Left	998200	104	69	88
4286	13	4970	CX	BCd	Body of Caudate Nucleus, Right	998375	79	71	86
4284	11	4953	CX	HCd	Head of Caudate Nucleus, Right	1000256	85	79	73
4289	11	4961	CX	Pu	Putamen, Right	1000257	71	86	76
4015	14	4978	CX	PrG-cs	precentral gyrus, Left, bank of the central sulcus	998379	128	47	92
4087	14	4986	CX	PoG-cs	post central gyrus, Left, bank of the central sulcus	998380	129	50	94
4088	14	4899	CX	PoG-sl	post central gyrus, Left, superior lateral aspect of gyrus	998383	139	41	94
4280	11	4969	CX	HCd	Head of Caudate Nucleus, Left	990123	104	78	73
4288	11	4977	CX	Pu	Putamen, Left	990124	114	88	75
4291	11	4985	CX	Acb	Nucleus Accumbens, Left	990122	100	92	75
4329	11	4898	CX	ATZ	Amygdaloid Transition zone, Left	991129	107	103	75
4093	14	4907	CX	PoG-sl	post central gyrus, Right, superior lateral aspect of gyrus	998416	39	51	95
4288	11	4906	CX	Pu	Putamen, Left	987618	120	84	78
4139	14	4915	CX	STG-i	superior temporal gyrus, Right, inferior bank of gyrus	998459	51	96	94
4145	14	4923	CX	MTG-s	middle temporal gyrus, Right, superior bank of gyrus	998458	49	98	94
4154	14	4931	CX	ITG-l	inferior temporal gyrus, Right, lateral bank of gyrus	998457	36	106	94
4101	20	4980	CX	SPL-s	supraparietal lobule, Right, superior bank of gyrus	997811	64	37	128
4116	20	4988	CX	AnG-s	angular gyrus, Right, superior bank of gyrus	997810	58	50	131
4135	14	4939	CX	STG-l	superior temporal gyrus, Left, lateral bank of gyrus	998470	155	88	98
4136	14	4947	CX	STG-i	superior temporal gyrus, Left, inferior bank of gyrus	998471	143	93	100
4150	14	4963	CX	ITG-l	inferior temporal gyrus, Left, lateral bank of gyrus	998474	146	114	104
4151	14	4971	CX	ITG-mts	inferior temporal gyrus, Left, bank of mts	998473	140	108	103
4098	20	4901	CX	SPL-s	supraparietal lobule, Left, superior bank of gyrus	997817	103	30	129
4153	14	4964	CX	ITG-its	inferior temporal gyrus, Right, bank of the its	998590	56	113	94
4162	14	4972	CX	FuG-its	fusiform gyrus, Right, bank of the its	998589	59	115	94
4073	14	4979	CX	PCLa-s	paracentral lobule, anterior part, Left, superior bank of gyrus	998545	96	41	90
4074	14	4987	CX	PCLa-i	paracentral lobule, anterior part, Left, inferior bank of gyrus	998557	103	58	87
4076	14	4900	CX	PCLa-s	paracentral lobule, anterior part, Right, superior bank of gyrus	998541	89	32	92
4077	14	4908	CX	PCLa-i	paracentral lobule, anterior part, Right, inferior bank of gyrus	998542	86	55	85
4223	14	4916	CX	CgGf-s	Cingulate gyrus, frontal part, Left, superior bank of gyrus	998558	98	58	87
4224	14	4924	CX	CgGf-i	Cingulate gyrus, frontal part, Left, inferior bank of gyrus	998559	94	65	87
4226	14	4932	CX	CgGf-s	Cingulate gyrus, frontal part, Right, superior bank of gyrus	998543	87	59	84
4227	14	4940	CX	CgGf-i	Cingulate gyrus, frontal part, Right, inferior bank of gyrus	998544	90	65	84
4155	20	4957	CX	ITG-mts	inferior temporal gyrus, Right, bank of mts	997848	53	95	137
4124	20	4965	CX	Pcu-i	precuneus, Right, inferior lateral bank of gyrus	997857	85	71	130
4902	6	4993	CX	IRoG	inferior rostral gyrus, Right	983536	89	98	41
4080	8	5001	CX	fro	frontal operculum, Right	992867	62	80	54
4114	20	4918	CX	AnG-i	angular gyrus, Left, inferior bank of gyrus	997871	131	69	141
4142	20	4926	CX	MTG-s	middle temporal gyrus, Left, superior bank of gyrus	997872	134	71	142
4143	20	4934	CX	MTG-i	middle temporal gyrus, Left, inferior bank of gyrus	997874	135	75	143
4142	20	4942	CX	MTG-s	middle temporal gyrus, Left, superior bank of gyrus	997873	132	71	142
4154	14	5009	CX	ITG-l	inferior temporal gyrus, Right, lateral bank of gyrus	998457	36	106	94
4120	20	4909	CX	Pcu-s	precuneus, Left, , superior lateral bank of gyrus	997818	98	34	127
4121	20	4917	CX	Pcu-i	precuneus, Left, , inferior lateral bank of gyrus	997819	96	50	126
4123	20	4925	CX	Pcu-s	precuneus, Right, superior lateral bank of gyrus	997816	92	38	128
4117	20	4933	CX	AnG-i	angular gyrus, Right, inferior bank of gyrus	997853	49	65	134
4146	20	4949	CX	MTG-i	middle temporal gyrus, Right, inferior bank of gyrus	997849	54	93	137
4186	20	4973	CX	Cun-pest	cuneus, Left, peristriate	997862	97	77	126
4193	20	4981	CX	LiG-pest	lingual gyrus, Left, peristriate	997864	105	94	138
4194	20	4989	CX	LiG-str	lingual gyrus, Left, striate	997863	99	88	134
4197	20	4902	CX	LiG-str	lingual gyrus, Right, striate	997859	82	84	134
4241	20	4910	CX	CgGr-i	Cingulate gyrus, retrosplenial part, Right, inferior bank of gyrus	997858	72	80	133
4153	20	4950	CX	ITG-its	inferior temporal gyrus, Right, bank of the its	997900	56	100	137
4196	20	4958	CX	LiG-pest	lingual gyrus, Right, peristriate	997897	86	92	136
4203	20	4966	CX	OTG-s	occipito-temporal gyrus, Right, superior bank of gyrus	997899	57	103	137
4204	20	4974	CX	OTG-i	occipito-temporal gyrus, Right, inferior bank of gyrus	997898	73	98	137
4149	20	4982	CX	ITG-its	inferior temporal gyrus, Left, bank of the its	997957	140	95	144
4150	20	4990	CX	ITG-l	inferior temporal gyrus, Left, lateral bank of gyrus	997956	144	95	144
4019	14	5017	CX	PrG-il	precentral gyrus, Right, inferior lateral aspect of gyrus	998405	60	33	91
4020	14	5025	CX	PrG-cs	precentral gyrus, Right, bank of the central sulcus	998404	53	54	92
4092	14	5033	CX	PoG-cs	post central gyrus, Right, bank of the central sulcus	998403	50	52	93
4093	14	5041	CX	PoG-sl	post central gyrus, Right, superior lateral aspect of gyrus	998402	48	44	94
4012	12	5066	CX	PrG-prc	precentral gyrus, Left, bank of the precentral sulcus	995243	126	47	79
4031	12	5074	CX	MFG-i	middle frontal gyrus, Left, inferior bank of gyrus	995242	117	41	79
4167	12	5026	CX	HG	Heschel's gyrus, Right	995072	54	98	83
4179	12	5034	CX	PLP	planum polare, Right	995073	57	102	83
4271	12	5042	CX	LIG	Long Insular Gyri, Right	995074	55	88	83
4289	12	5050	CX	Pu	Putamen, Right	995068	68	83	84
4298	12	5058	CX	GPe	globus pallidus, external segment, Right	995067	73	85	84
4023	12	5049	CX	SFG-m	superior frontal gyrus, Left, medial bank of gyrus	993142	100	49	79
4026	12	5057	CX	SFG-m	superior frontal gyrus, Right, medial bank of gyrus	993139	86	51	75
4223	12	5065	CX	CgGf-s	Cingulate gyrus, frontal part, Left, superior bank of gyrus	993141	100	54	79
4224	12	5073	CX	CgGf-i	Cingulate gyrus, frontal part, Left, inferior bank of gyrus	993140	95	60	79
4226	12	5081	CX	CgGf-s	Cingulate gyrus, frontal part, Right, superior bank of gyrus	993138	86	55	76
4227	12	4994	CX	CgGf-i	Cingulate gyrus, frontal part, Right, inferior bank of gyrus	993137	88	64	79
4282	12	5002	CX	BCd	Body of Caudate Nucleus, Left	995477	101	72	81
4286	12	5010	CX	BCd	Body of Caudate Nucleus, Right	995474	78	73	83
9222	12	5018	CX	cc	corpus callosum	995484	87	68	81
4145	20	4941	CX	MTG-s	middle temporal gyrus, Right, superior bank of gyrus	997850	44	81	136
4292	9	5665	CX	Acb	Nucleus Accumbens, Right	979628	83	92	58
4323	9	5673	CX	Cl	Claustrum, Right	978486	71	90	59
4322	9	5689	CX	Cl	Claustrum, Left	977015	116	94	57
4291	9	5681	CX	Acb	Nucleus Accumbens, Left	978309	105	94	58
4323	10	5697	CX	Cl	Claustrum, Right	978365	68	94	69
4322	10	5705	CX	Cl	Claustrum, Left	978619	120	91	71
4291	10	5713	CX	Acb	Nucleus Accumbens, Left	998603	103	96	71
4292	10	5721	CX	Acb	Nucleus Accumbens, Right	998604	86	95	69
4292	11	5729	CX	Acb	Nucleus Accumbens, Right	999200	87	95	76
4314	11	5737	CX	SI	Substantia Innominata, Right	992030	79	97	76
4323	11	5745	CX	Cl	Claustrum, Right	992127	61	86	78
4298	11	5753	CX	GPe	globus pallidus, external segment, Right	991186	82	89	75
4382	11	5666	CX	LA	Lateral Nucleus, Right	992123	72	108	75
4335	11	5674	CX	ATZ	Amygdaloid Transition zone, Right	992126	77	102	76
4346	11	5682	CX	BLA	Basolateral Nucleus, Right	992121	78	108	75
4355	11	5690	CX	BMA	Basomedial nucleus, Right	992122	76	106	75
4307	11	5698	CX	SI	Substantia Innominata, Left	990119	102	97	75
4301	11	5706	CX	SptN	Septal nuclei, Left	990118	93	85	74
4304	11	5714	CX	SptN	Septal nuclei, Right	1000027	92	83	73
4295	11	5730	CX	GPe	globus pallidus, external segment, Left	991153	105	91	74
4322	11	5738	CX	Cl	Claustrum, Left	987617	124	88	78
4323	13	5667	CX	Cl	Claustrum, Right	997156	67	84	94
4322	13	5675	CX	Cl	Claustrum, Left	997493	122	88	92
4301	12	5683	CX	SptN	Septal nuclei, Left	996326	95	74	82
4263	17	5707	CX	CA1	CA1 field, Right	1001646	77	89	116
4264	17	5715	CX	CA2	CA2 field, Right	1001641	75	86	115
4265	17	5723	CX	CA3	CA3 field, Right	1001496	76	86	115
4266	17	5731	CX	CA4	CA4 field, Right	1001475	76	87	115
4267	17	5739	CX	DG	Dentate gyrus, Right	998739	76	87	115
4286	17	5747	CX	BCd	Body of Caudate Nucleus, Right	1001647	75	80	113
4251	17	5755	CX	S	subiculum, Left	1002563	108	85	113
4254	17	5668	CX	CA1	CA1 field, Left	1002584	111	82	114
4255	17	5676	CX	CA2	CA2 field, Left	1002583	111	79	112
4256	17	5684	CX	CA3	CA3 field, Left	1002649	108	77	110
4257	17	5692	CX	CA4	CA4 field, Left	1002282	108	77	110
4258	17	5700	CX	DG	Dentate gyrus, Left	998938	109	77	110
4282	17	5708	CX	BCd	Body of Caudate Nucleus, Left	1002812	116	80	116
4284	10	5089	CX	HCd	Head of Caudate Nucleus, Right	978418	81	77	69
4013	10	4580	CX	PrG-sl	precentral gyrus, Left, superior lateral aspect of gyrus	978416	143	77	71
4045	4	4602	CX	orIFG	inferior frontal gyrus, orbital part, Left	977483	129	81	34
4890	2	4561	CX	FP-s	frontal pole, Left, superior aspect	980065	107	78	18
4042	8	5097	CX	opIFG	inferior frontal gyrus, opercular part, Left	993105	144	64	59
4226	8	4628	CX	CgGf-s	Cingulate gyrus, frontal part, Right, superior bank of gyrus	991118	89	63	53
4238	18	4851	CX	CgGr-i	Cingulate gyrus, retrosplenial part, Left, inferior bank of gyrus	997597	95	70	109
4143	20	5105	CX	MTG-i	middle temporal gyrus, Left, inferior bank of gyrus	997874	135	75	143
4288	11	4914	CX	Pu	Putamen, Left	992170	120	84	78
4142	14	4955	CX	MTG-s	middle temporal gyrus, Left, superior bank of gyrus	998472	146	97	102
4288	12	5121	CX	Pu	Putamen, Left	994822	115	83	90
4295	12	5129	CX	GPe	globus pallidus, external segment, Left	994820	109	87	87
4296	12	5137	CX	GPi	globus pallidus, internal segment, Left	994815	106	89	86
4099	20	5114	CX	SPL-i	supraparietal lobule, Left, inferior bank of gyrus	997833	121	43	134
4114	20	5130	CX	AnG-i	angular gyrus, Left, inferior bank of gyrus	997836	132	57	139
4149	14	5169	CX	ITG-its	inferior temporal gyrus, Left, bank of the its	1007967	135	108	104
4158	14	5177	CX	FuG-its	fusiform gyrus, Left, bank of the its	1007966	130	106	104
4159	14	5090	CX	FuG-l	fusiform gyrus, Left, lateral bank of gyrus	1008009	124	112	104
4164	14	5145	CX	FuG-cos	fusiform gyrus, Right, bank of cos	1009765	64	113	94
4247	14	5153	CX	PHG-l	parahippocampal gyrus, Right, lateral bank of gyrus	1009762	73	113	94
4143	16	5133	CX	MTG-i	middle temporal gyrus, Left, inferior bank of gyrus	1011800	147	101	118
4149	16	5141	CX	ITG-its	inferior temporal gyrus, Left, bank of the its	1011809	133	105	116
4151	16	5149	CX	ITG-mts	inferior temporal gyrus, Left, bank of mts	1011802	147	105	118
4158	16	5157	CX	FuG-its	fusiform gyrus, Left, bank of the its	1011810	130	105	116
4123	22	5094	CX	Pcu-s	precuneus, Right, superior lateral bank of gyrus	1011288	86	56	144
4153	16	5101	CX	ITG-its	inferior temporal gyrus, Right, bank of the its	1011564	55	106	111
4162	16	5117	CX	FuG-its	fusiform gyrus, Right, bank of the its	1011529	58	107	111
4136	16	5172	CX	STG-i	superior temporal gyrus, Left, inferior bank of gyrus	1011437	152	85	115
4142	16	5180	CX	MTG-s	middle temporal gyrus, Left, superior bank of gyrus	1011433	155	90	116
4136	16	5093	CX	STG-i	superior temporal gyrus, Left, inferior bank of gyrus	1011443	150	85	115
4214	24	5159	CX	SOG-s	superior occipital gyrus, Left, superior bank of gyrus	1011996	101	71	161
4215	24	5167	CX	SOG-i	superior occipital gyrus, Left, inferior bank of gyrus	1012002	110	76	163
4145	16	5148	CX	MTG-s	middle temporal gyrus, Right, superior bank of gyrus	1011308	40	92	111
4170	16	5156	CX	TG	transverse gyri, Right	1011354	58	76	109
4139	16	5164	CX	STG-i	superior temporal gyrus, Right, inferior bank of gyrus	1011351	53	86	111
4090	16	5108	CX	PoG-pcs	post central gyrus, Left, bank of the posterior central sulcus	1011247	130	50	109
4106	16	5116	CX	SMG-s	supramarginal gyrus, Left, superior bank of gyrus	1011246	147	53	111
4135	16	5132	CX	STG-l	superior temporal gyrus, Left, lateral bank of gyrus	1011244	154	69	114
4189	24	5096	CX	Cun-pest	cuneus, Right, peristriate	1012026	84	82	162
4190	24	5104	CX	Cun-str	cuneus, Right, striate	1012025	95	89	161
4196	24	5112	CX	LiG-pest	lingual gyrus, Right, peristriate	1012006	81	103	164
4015	16	5171	CX	PrG-cs	precentral gyrus, Left, bank of the central sulcus	1011105	113	33	103
4088	16	5092	CX	PoG-sl	post central gyrus, Left, superior lateral aspect of gyrus	1011124	122	32	103
4089	16	5100	CX	PoG-il	post central gyrus, Left, inferior lateral aspect of gyrus	1011146	128	41	105
4186	24	5136	CX	Cun-pest	cuneus, Left, peristriate	1012033	106	86	161
4194	24	5152	CX	LiG-str	lingual gyrus, Left, striate	1012031	105	96	165
4207	24	5160	CX	IOG-s	inferior occipital gyrus, Left, superior bank of gyrus	1012030	125	91	166
4208	24	5168	CX	IOG-i	inferior occipital gyrus, Left, inferior bank of gyrus	1012029	120	105	166
4074	16	5115	CX	PCLa-i	paracentral lobule, anterior part, Left, inferior bank of gyrus	1011030	101	50	100
4077	16	5131	CX	PCLa-i	paracentral lobule, anterior part, Right, inferior bank of gyrus	1011027	82	59	97
4226	16	5147	CX	CgGf-s	Cingulate gyrus, frontal part, Right, superior bank of gyrus	1011024	84	61	96
4227	16	5155	CX	CgGf-i	Cingulate gyrus, frontal part, Right, inferior bank of gyrus	1011023	92	63	97
4101	22	5165	CX	SPL-s	supraparietal lobule, Right, superior bank of gyrus	1011272	71	53	145
4102	22	5173	CX	SPL-i	supraparietal lobule, Right, inferior bank of gyrus	1011271	67	67	146
4092	16	5091	CX	PoG-cs	post central gyrus, Right, bank of the central sulcus	1010952	82	33	102
4095	16	5146	CX	PoG-pcs	post central gyrus, Right, bank of the posterior central sulcus	1010595	58	40	105
4109	16	5154	CX	SMG-s	supramarginal gyrus, Right, superior bank of gyrus	1010582	49	42	107
4110	16	5162	CX	SMG-i	supramarginal gyrus, Right, inferior bank of gyrus	1010558	48	49	109
4110	16	5170	CX	SMG-i	supramarginal gyrus, Right, inferior bank of gyrus	1010573	48	51	109
4099	22	5110	CX	SPL-i	supraparietal lobule, Left, inferior bank of gyrus	1011441	117	63	147
4121	22	5126	CX	Pcu-i	precuneus, Left, , inferior lateral bank of gyrus	1011355	108	69	145
4217	22	5150	CX	SOG-s	superior occipital gyrus, Right, superior bank of gyrus	1011531	50	71	148
4196	22	5158	CX	LiG-pest	lingual gyrus, Right, peristriate	1011584	86	104	148
4204	22	5174	CX	OTG-i	occipito-temporal gyrus, Right, inferior bank of gyrus	1011583	78	99	149
4211	22	5182	CX	IOG-i	inferior occipital gyrus, Right, inferior bank of gyrus	1011562	62	100	149
4211	22	5095	CX	IOG-i	inferior occipital gyrus, Right, inferior bank of gyrus	1011563	60	101	149
4186	22	5103	CX	Cun-pest	cuneus, Left, peristriate	1011657	96	71	147
4187	22	5111	CX	Cun-str	cuneus, Left, striate	1011656	101	88	149
4190	22	5119	CX	Cun-str	cuneus, Right, striate	1011659	83	82	147
4193	22	5127	CX	LiG-pest	lingual gyrus, Left, peristriate	1011654	108	105	151
4194	22	5135	CX	LiG-str	lingual gyrus, Left, striate	1011655	100	94	149
4197	22	5143	CX	LiG-str	lingual gyrus, Right, striate	1011658	85	84	147
4902	4	4555	CX	IRoG	inferior rostral gyrus, Right	977534	85	92	28
4045	4	5185	CX	orIFG	inferior frontal gyrus, orbital part, Left	977483	129	81	34
4153	18	5193	CX	ITG-its	inferior temporal gyrus, Right, bank of the its	997643	53	108	127
4113	20	5122	CX	AnG-s	angular gyrus, Left, superior bank of gyrus	997834	121	46	135
4244	14	5098	CX	PHG-l	parahippocampal gyrus, Left, lateral bank of gyrus	1007964	111	104	103
4245	14	5106	CX	PHG-cos	parahippocampal gyrus, Left, bank of the cos	1007965	117	106	103
4139	16	5140	CX	STG-i	superior temporal gyrus, Right, inferior bank of gyrus	1011325	51	87	111
4210	24	5175	CX	IOG-s	inferior occipital gyrus, Right, superior bank of gyrus	1011999	62	89	163
4218	24	5183	CX	SOG-i	superior occipital gyrus, Right, inferior bank of gyrus	1012000	63	87	162
4107	16	5124	CX	SMG-i	supramarginal gyrus, Left, inferior bank of gyrus	1011245	151	60	111
4197	24	5120	CX	LiG-str	lingual gyrus, Right, striate	1012010	95	96	164
4211	24	5128	CX	IOG-i	inferior occipital gyrus, Right, inferior bank of gyrus	1012005	79	104	164
4087	16	5179	CX	PoG-cs	post central gyrus, Left, bank of the central sulcus	1011122	117	39	103
4073	16	5107	CX	PCLa-s	paracentral lobule, anterior part, Left, superior bank of gyrus	1011029	97	35	103
4076	16	5123	CX	PCLa-s	paracentral lobule, anterior part, Right, superior bank of gyrus	1011028	92	35	98
4223	16	5139	CX	CgGf-s	Cingulate gyrus, frontal part, Left, superior bank of gyrus	1011031	100	54	98
4116	22	5181	CX	AnG-s	angular gyrus, Right, superior bank of gyrus	1011270	66	59	145
4020	16	5178	CX	PrG-cs	precentral gyrus, Right, bank of the central sulcus	1010935	84	34	101
4098	22	5102	CX	SPL-s	supraparietal lobule, Left, superior bank of gyrus	1011292	112	44	145
4214	22	5134	CX	SOG-s	superior occipital gyrus, Left, superior bank of gyrus	1011442	124	61	153
4117	22	5201	CX	AnG-i	angular gyrus, Right, inferior bank of gyrus	1011530	60	70	148
4117	22	5142	CX	AnG-i	angular gyrus, Right, inferior bank of gyrus	1011530	60	70	148
4166	14	5241	CX	HG	Heschel's gyrus, Left	1015789	128	82	98
4270	14	5249	CX	LIG	Long Insular Gyri, Left	1015791	123	76	98
4288	14	5257	CX	Pu	Putamen, Left	1015792	121	88	99
4179	14	5209	CX	PLP	planum polare, Right	1012662	58	90	94
4271	14	5217	CX	LIG	Long Insular Gyri, Right	1012665	62	89	94
4286	14	5225	CX	BCd	Body of Caudate Nucleus, Right	1020986	74	65	87
4289	14	5233	CX	Pu	Putamen, Right	1012768	67	86	93
4207	22	5265	CX	IOG-s	inferior occipital gyrus, Left, superior bank of gyrus	1020404	138	89	154
4208	22	5273	CX	IOG-i	inferior occipital gyrus, Left, inferior bank of gyrus	1020390	125	101	153
4215	22	5186	CX	SOG-i	superior occipital gyrus, Left, inferior bank of gyrus	1020406	136	74	153
4208	22	5194	CX	IOG-i	inferior occipital gyrus, Left, inferior bank of gyrus	1020410	124	99	153
4417	14	5266	CX	DTLv	Lateral group of Nuclei, Left, Ventral division	1032704	102	81	95
4472	14	5250	CX	DTLv	Lateral group of Nuclei, Right, Ventral division	1029317	78	84	89
4472	14	5258	CX	DTLv	Lateral group of Nuclei, Right, Ventral division	1029329	78	84	89
4149	12	5202	CX	ITG-its	inferior temporal gyrus, Left, bank of the its	994879	130	117	86
4158	12	5210	CX	FuG-its	fusiform gyrus, Left, bank of the its	994881	128	116	86
4159	12	5218	CX	FuG-l	fusiform gyrus, Left, lateral bank of gyrus	994882	122	123	87
4160	12	5226	CX	FuG-cos	fusiform gyrus, Left, bank of cos	994883	122	118	86
4244	12	5234	CX	PHG-l	parahippocampal gyrus, Left, lateral bank of gyrus	994887	113	118	86
4245	12	5242	CX	PHG-cos	parahippocampal gyrus, Left, bank of the cos	994884	119	116	86
* the locations of all sampled structures are given in native MRI voxel coordinates
(mri_cx
