# Supplementary material
Source: publisher figshare collection journal article supplement (https://plos.figshare.com/articles/dataset/_/127846)

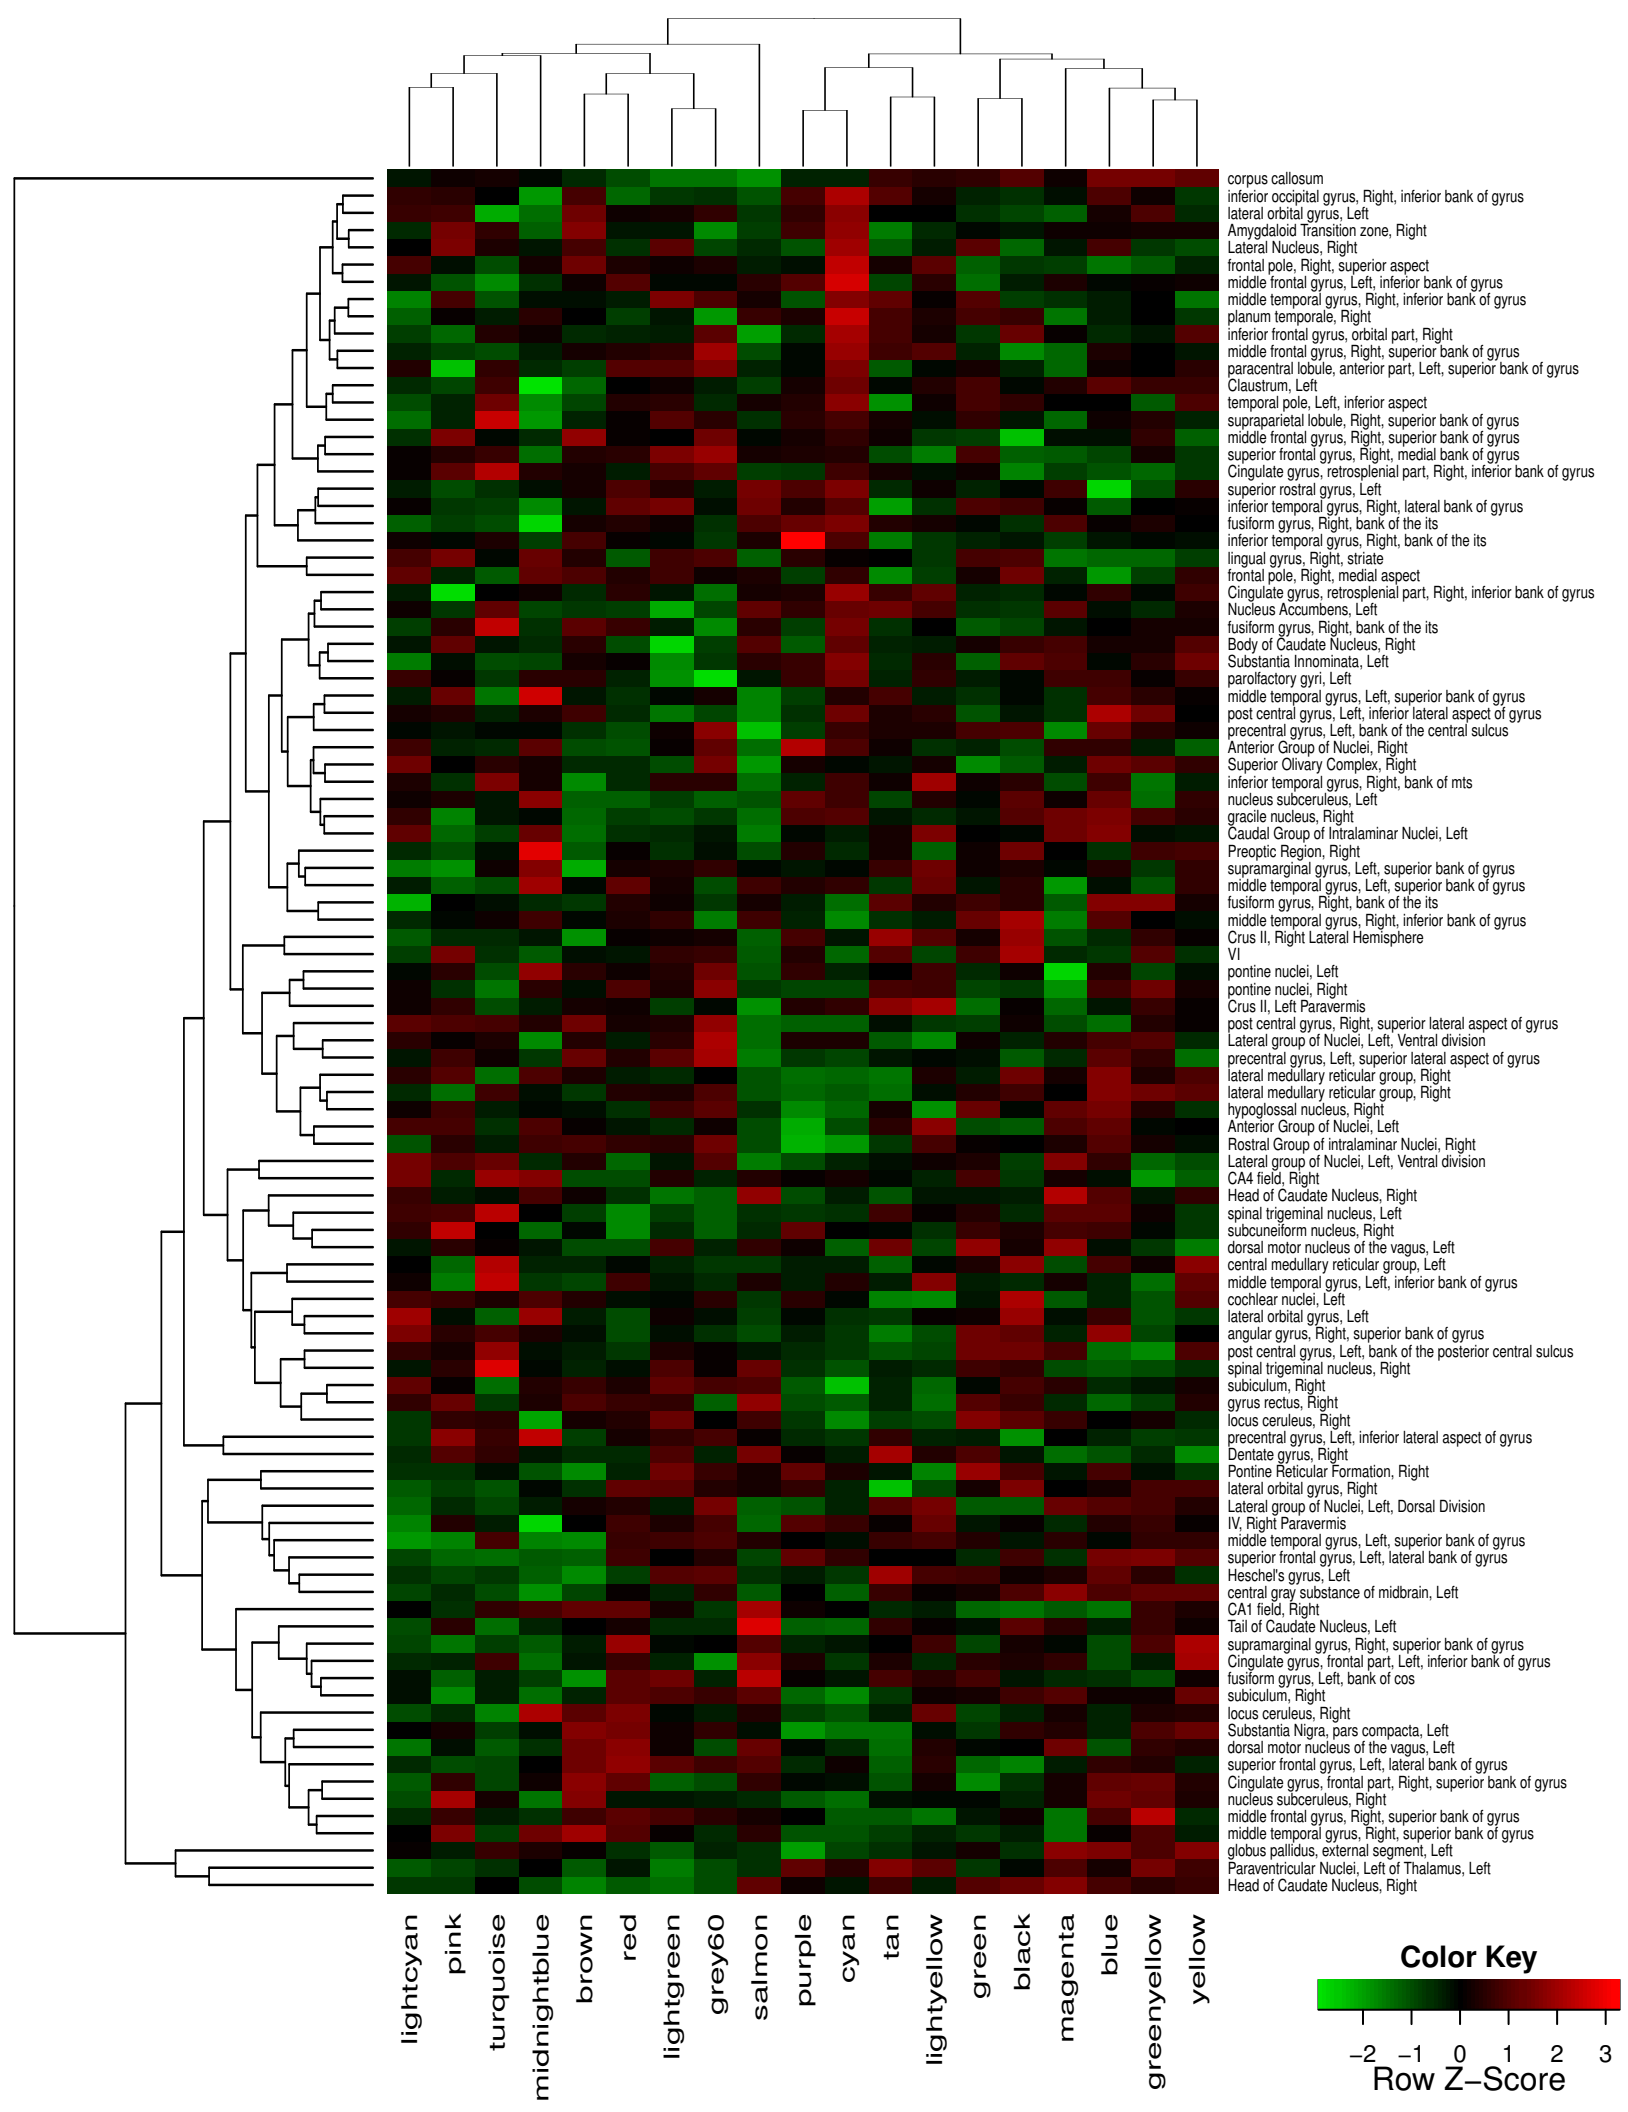

Supplement: Supplementary file 1 [file 1 › Figure_S2.pdf]

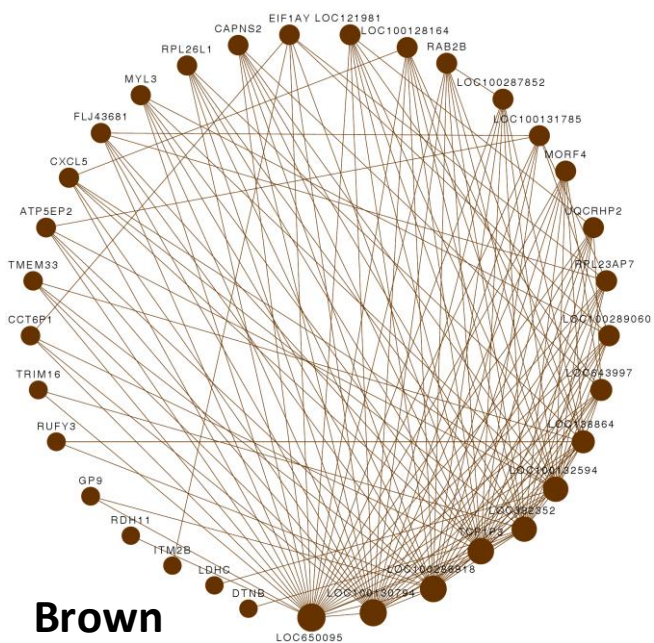

**Brown**

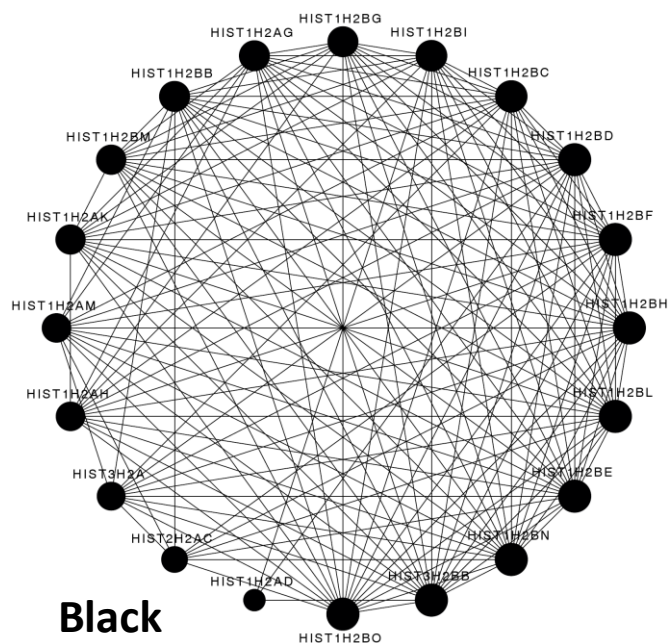

**Black**

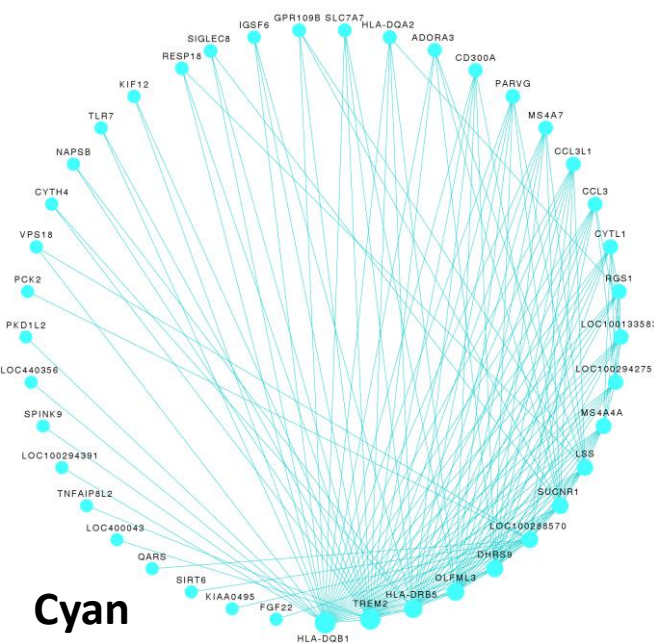

**Cyan**

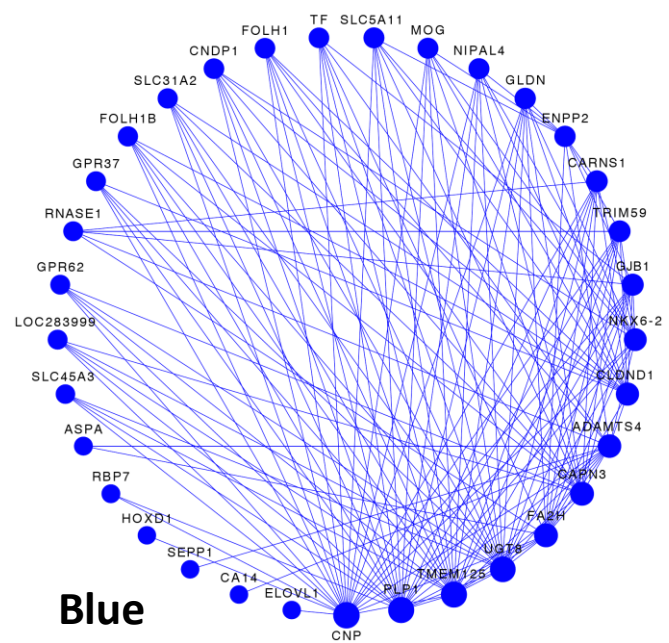

**Blue**



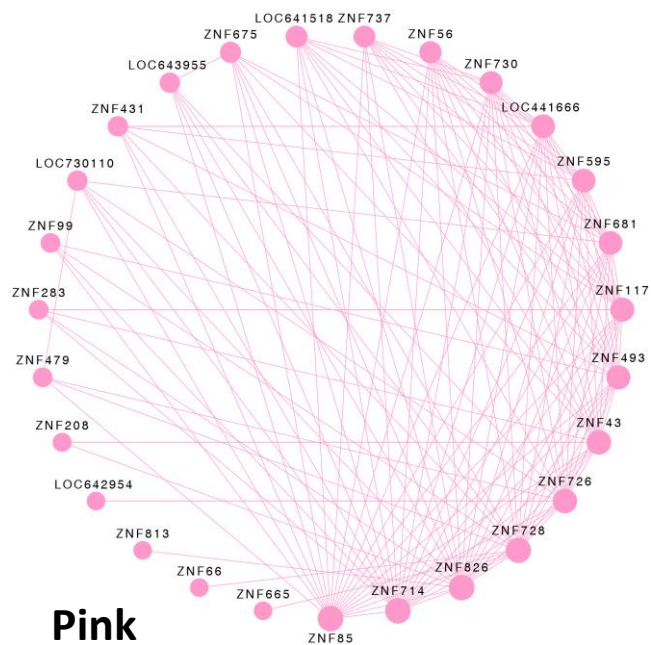

**Pink**

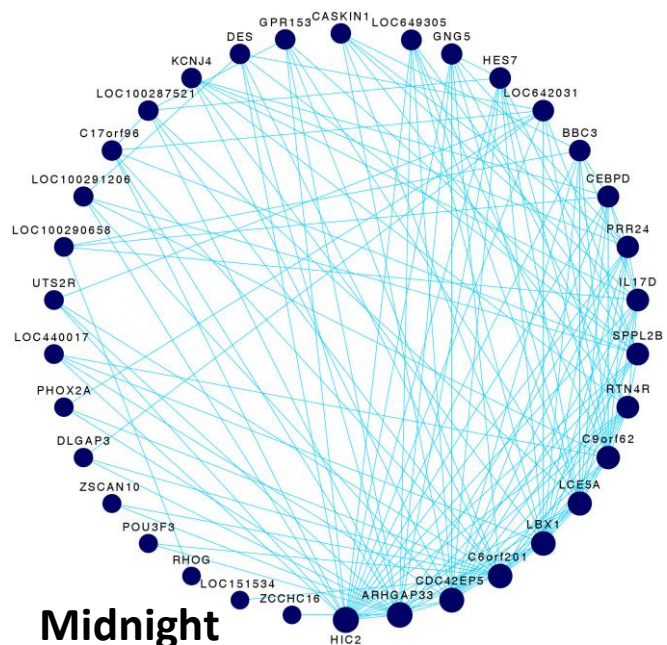

**Midnight-Blue**

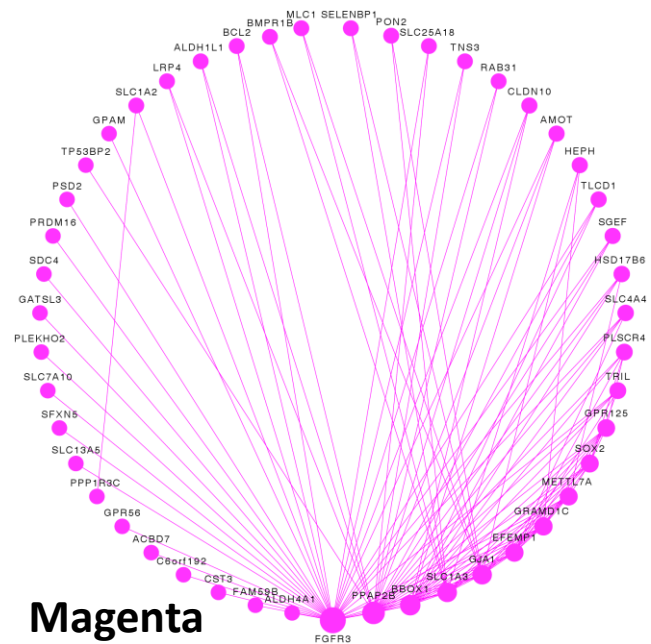

**Magenta**

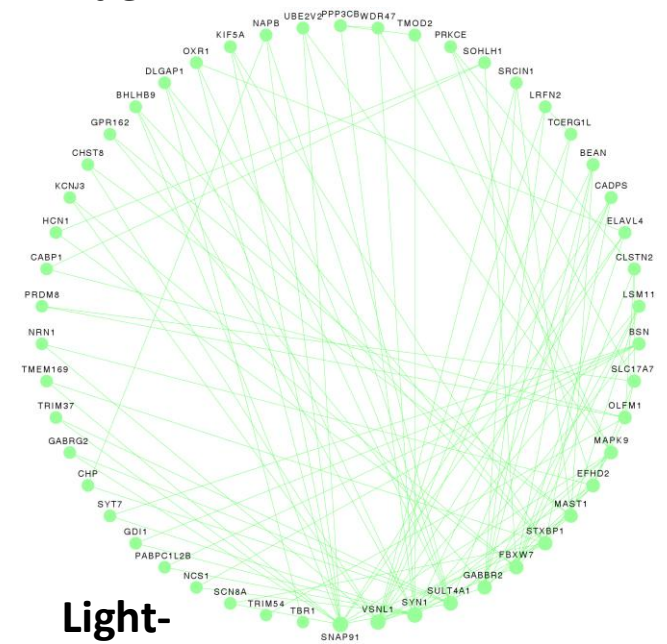

**Light-Green**

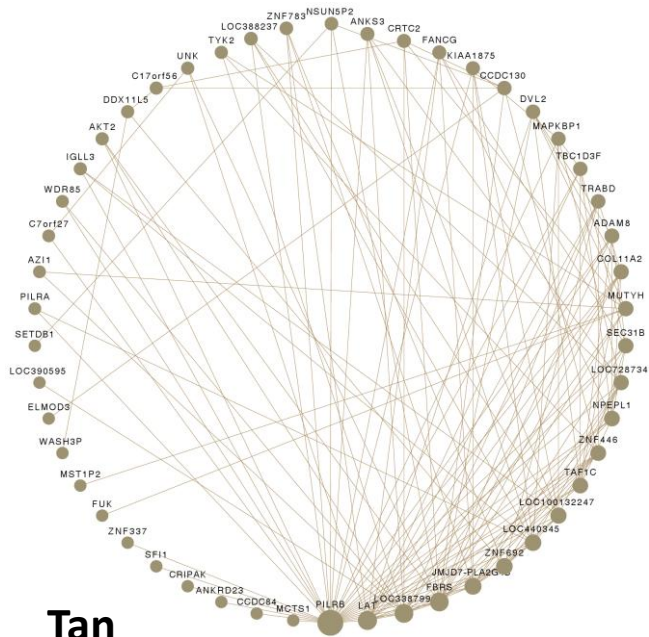

**Tan**

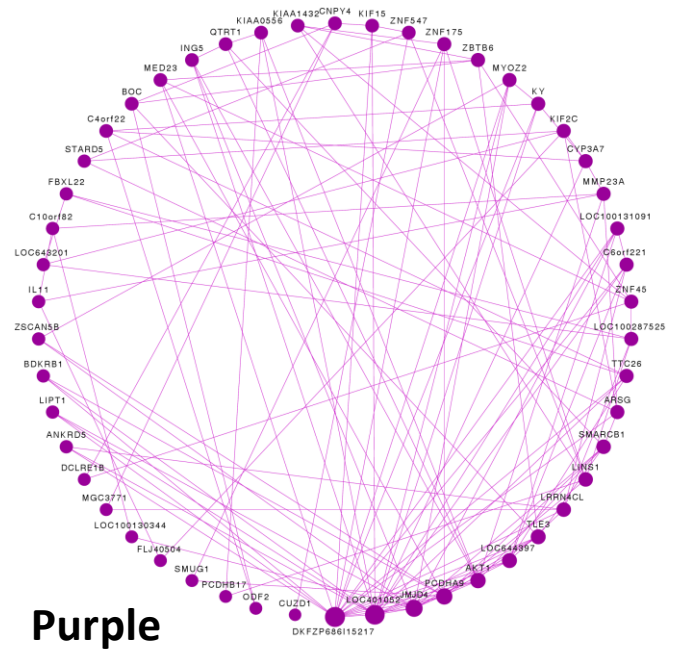

**Purple**

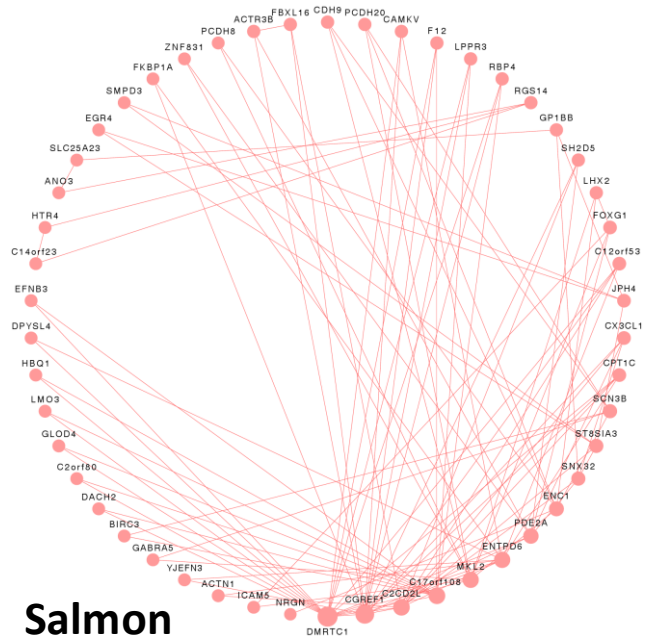

**Salmon**

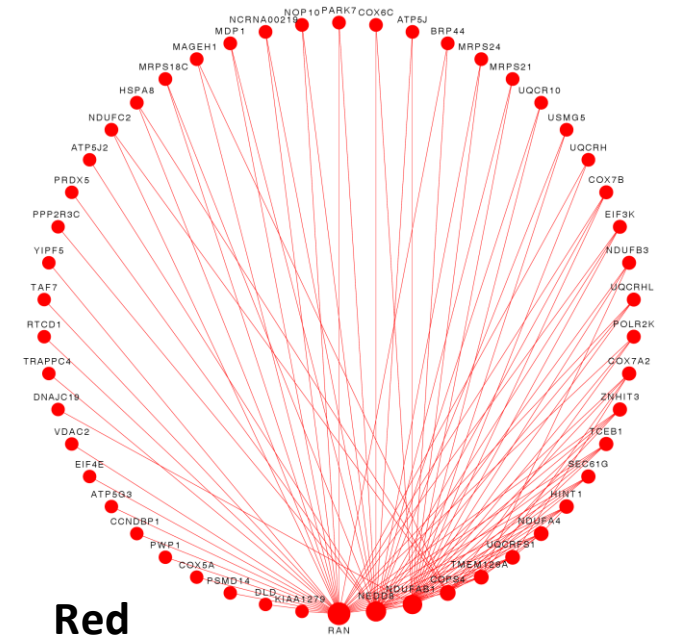

**Red**

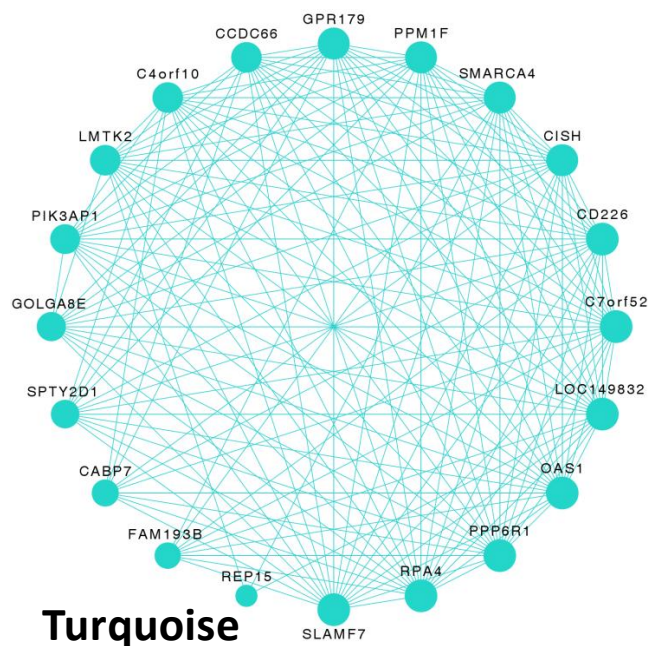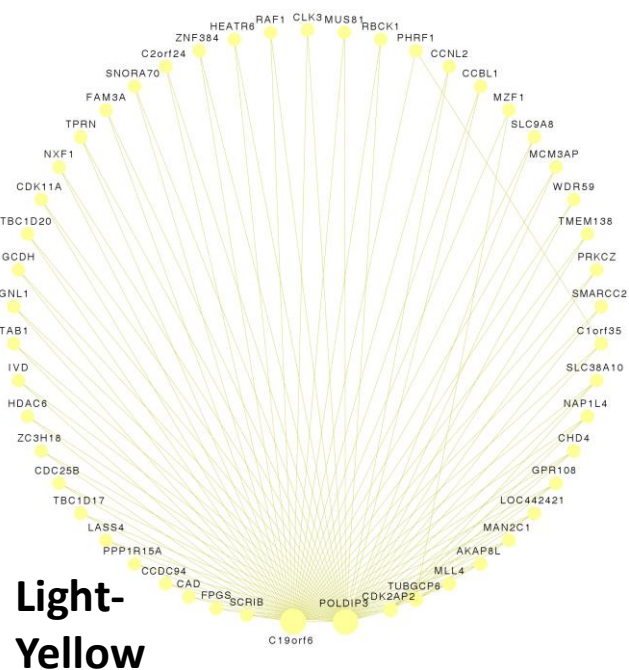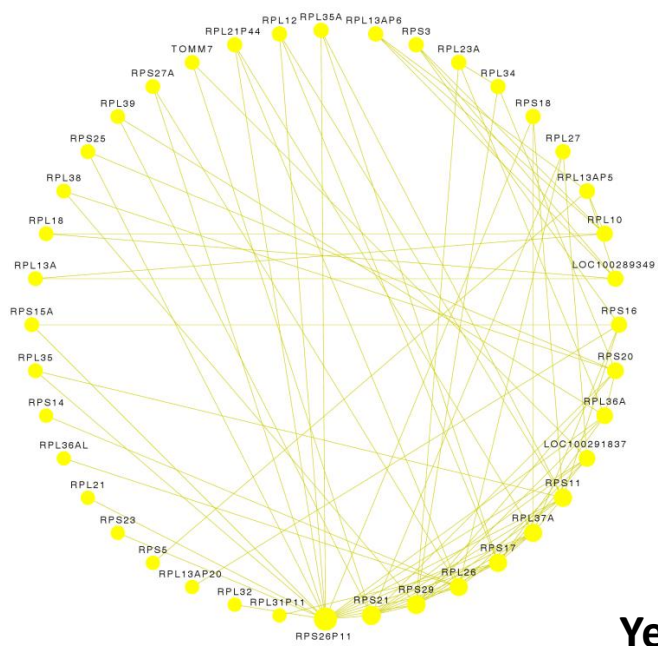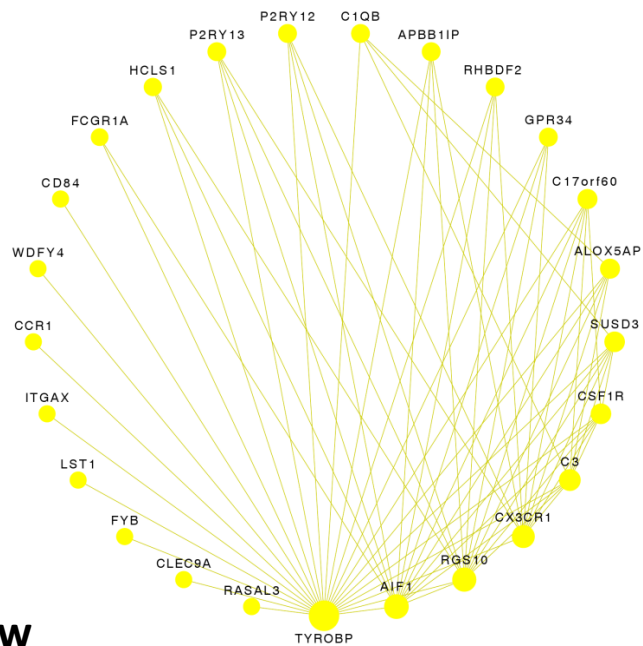

Supplement: Supplementary file 1 [file 1 › Figure_S4.pdf]

**A**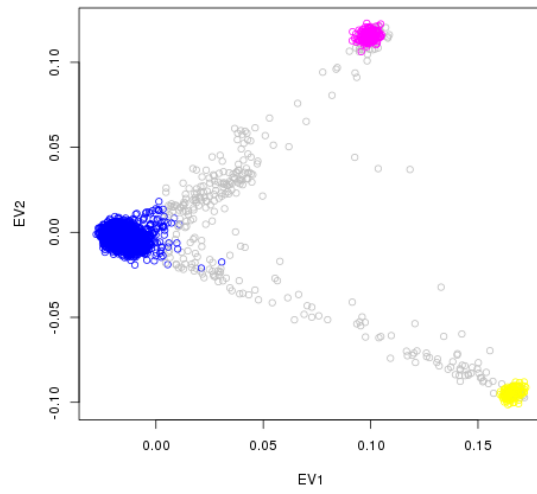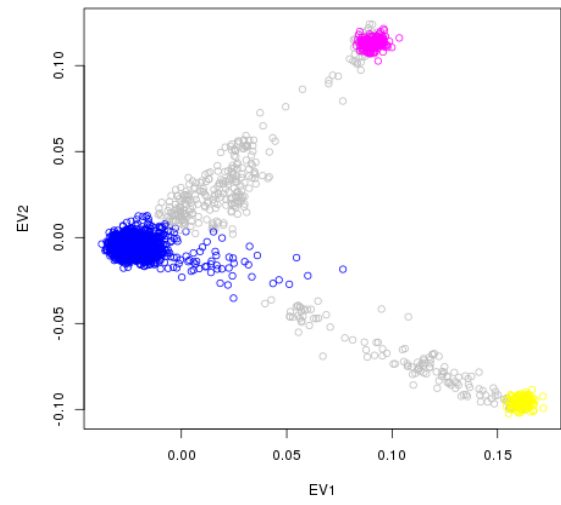**B**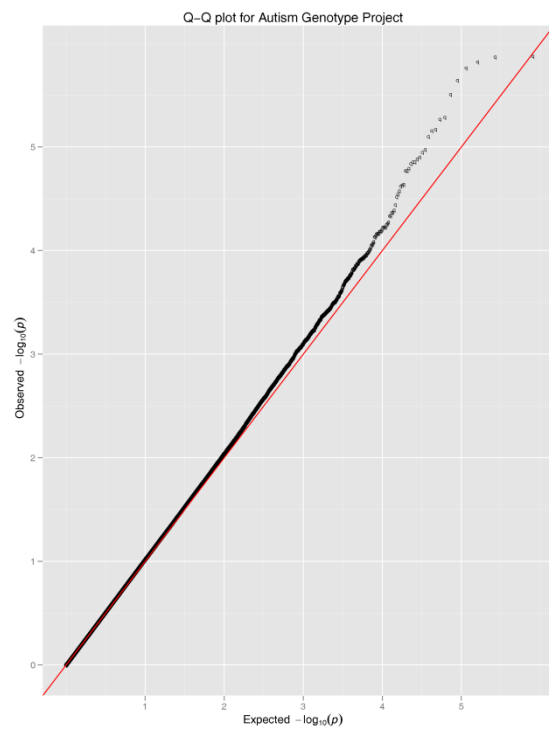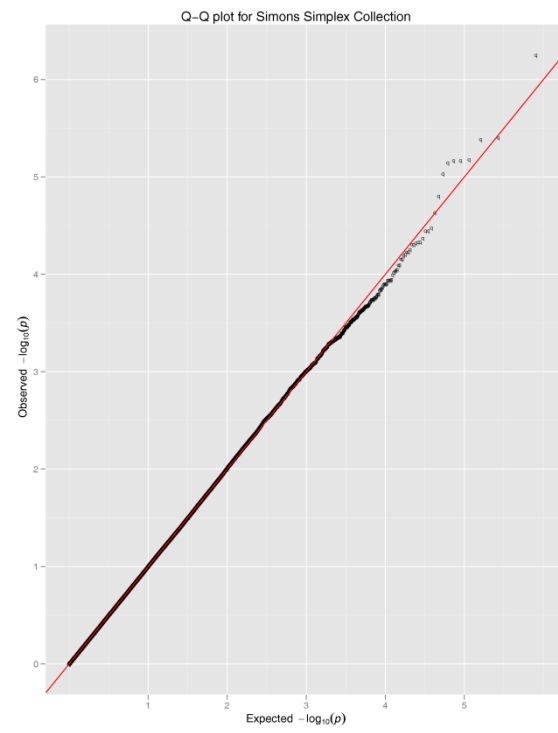

Supplement: Supplementary file 1 [file 1 › Figure_S5.pdf]
